# Supplementary material for: Plural molecular and cellular mechanisms of pore domain KCNQ2 encephalopathy
Source: eLife journal article supplement (doi:10.7554/elife.91204), 2024-03-12

WT

G256W/+

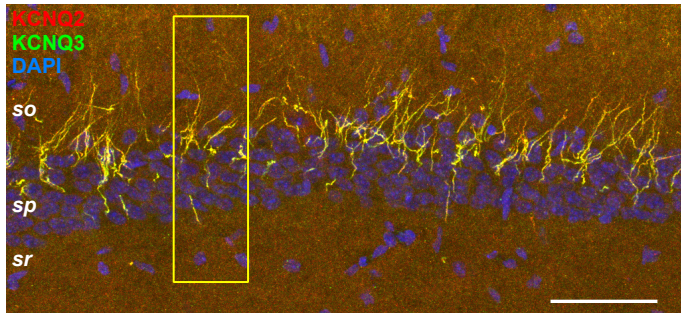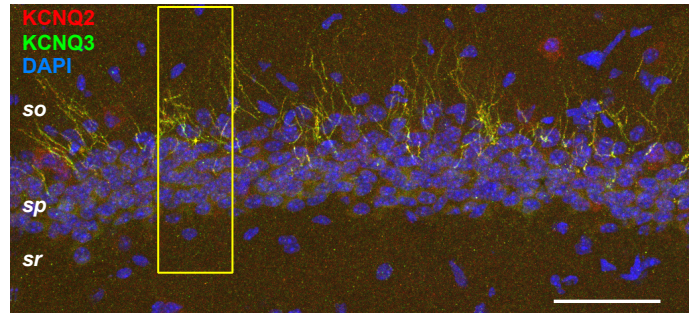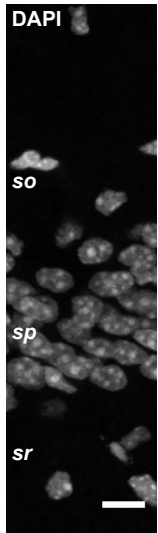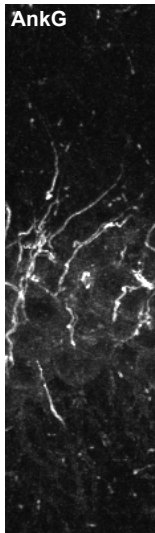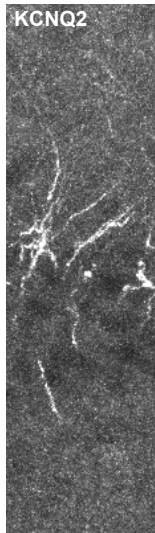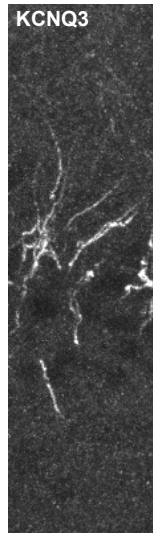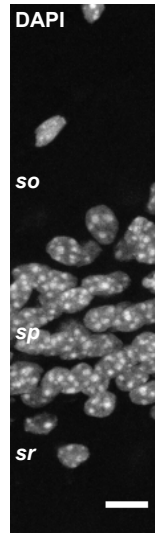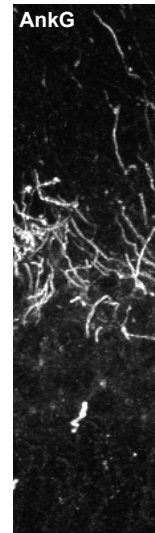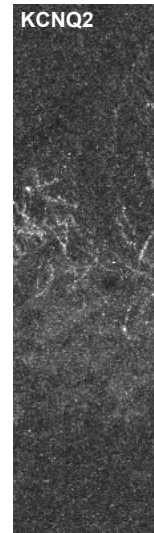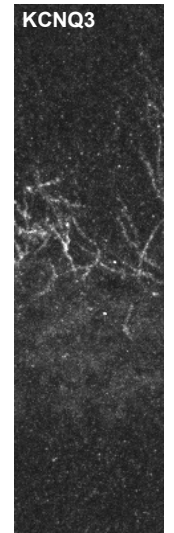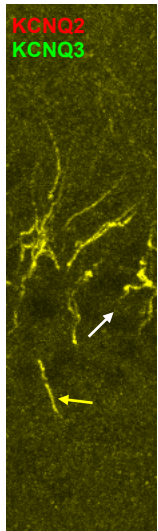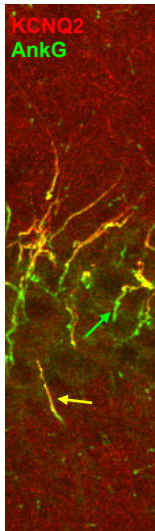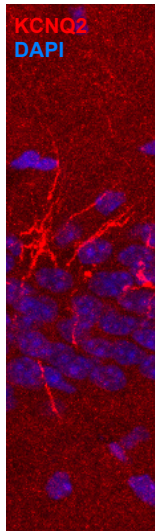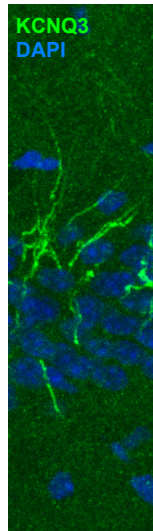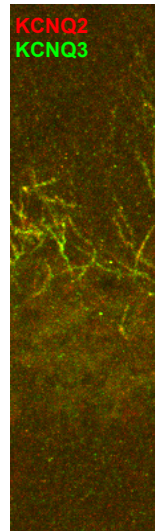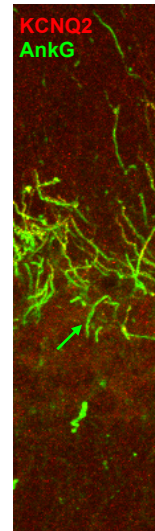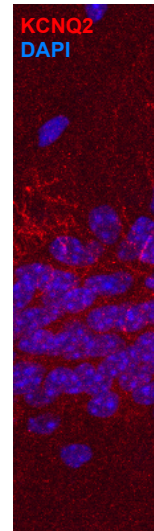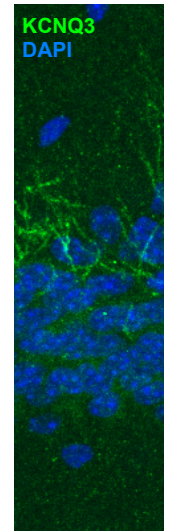

Supplement: data1 [file elife-91204-data1-v1.pdf]
