# Supplementary material for: Plural molecular and cellular mechanisms of pore domain KCNQ2 encephalopathy
Source: eLife journal article supplement (doi:10.7554/elife.91204), 2024-03-12

WT

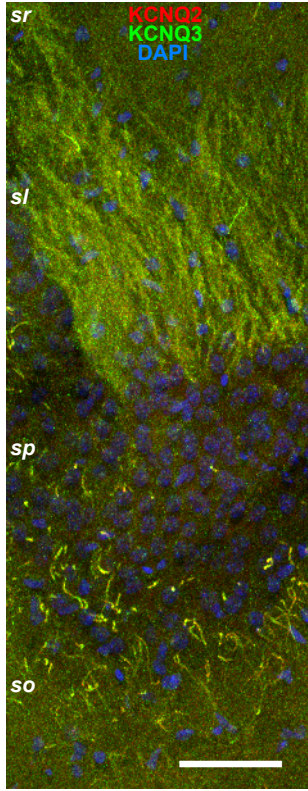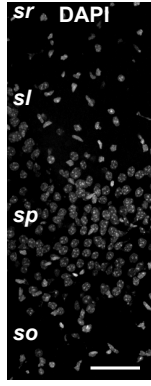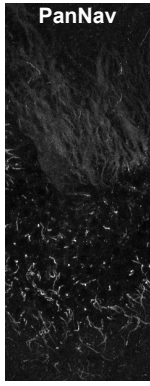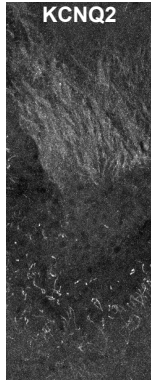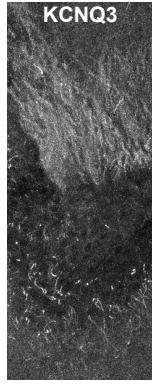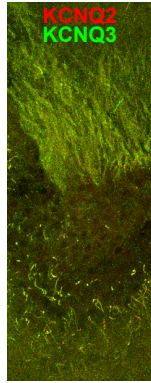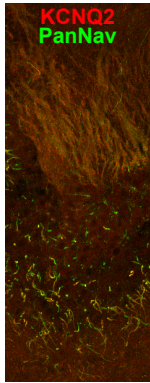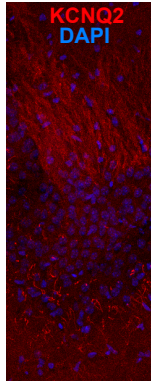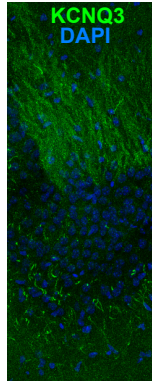

G256W/+

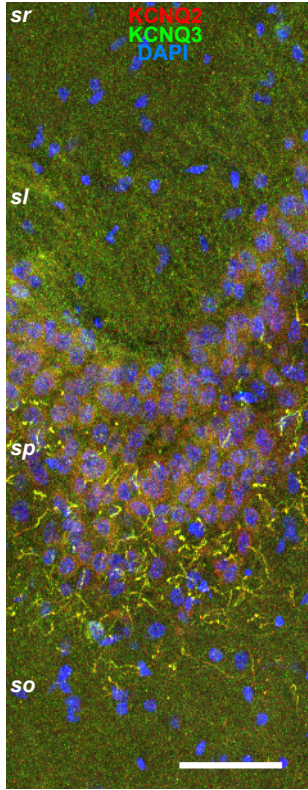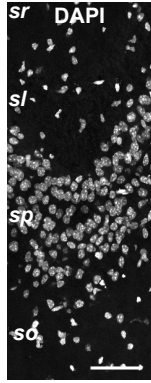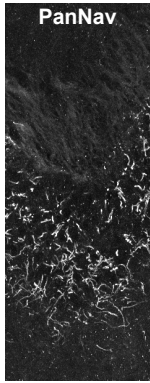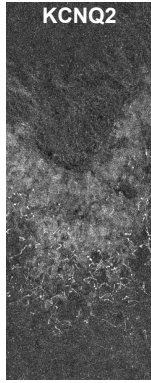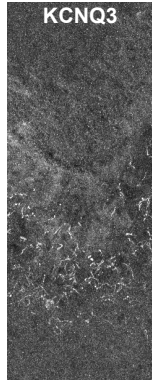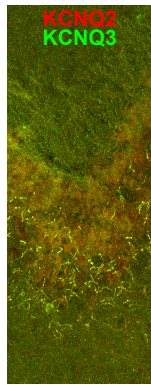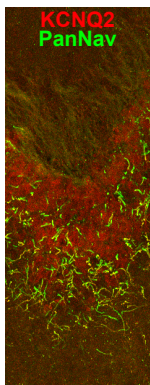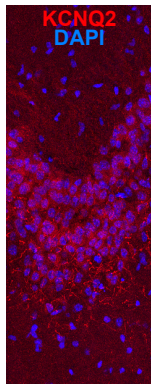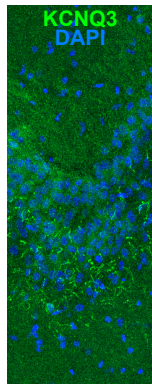

Supplement: data3 [file elife-91204-data3-v1.pdf]
