# Supplementary material for: Plural molecular and cellular mechanisms of pore domain KCNQ2 encephalopathy
Source: eLife. 2025 Jan 6;13:RP91204. doi: 10.7554/eLife.91204 (PMC11703504; doi:10.7554/eLife.91204)
Supplement: Figure 3—figure supplement 1—source data 1. [file elife-91204-fig3-figsupp1-data1.xlsx]

## Sheet: hetero curve summary
Q2Q3		2018.04.26.0012	2018.04.26.0012	2018.04.26.0014	2018.04.26.0017	2018.04.26.0019	2018.04.27.0014	2018.05.03.0001	2018.05.03.0005	2018.05.03.0006	2018.05.03.0007	2018.05.03.0008		error					Q2Q3	Q2Q3-G256W													2018.05.04.0000	2018.05.04.0001	2018.05.04.0008
n=11
-80		0.00444158	0.0062058	0.0054762	0.000358411	8.3743e-05	0.0063716	1.57284e-05	5.85648e-05	0.00372363	0.000962206	0.00213106	0.00271168	0.000782839					0.00271168	0.0197193													0.0748637	5.97241e-05	0.0144153
-70		1.66719e-05	0.00347786	0.00282998	0.0016247	0.000907986	0.000293917	0.000794362	0.00713816	0.00354247	0.000138149	0.000106877	0.00189738	0.000662081					0.00189738	0.00240319													0.0153172	0.00333727	0.000239415
-60		0.000730366	4.26771e-05	0.000448376	0.000105153	0.00132011	0.000141975	0.00205964	0.0276238	0.000100294	0.00407531	0.00415525	0.00370936	0.00243527					0.00370936	0.00376477													0.00157569	0.00534021	0.00732737
-50		0.0314192	0.0311614	0.000183754	0.0237848	0.00420496	0.0144245	0.0188003	0.0923946	0.0039048	0.0573643	0.0207059	0.0271226	0.00813666					0.0271226	0.0230627													0.0256233	0.0293755	0.0262286
-40		0.181295	0.193524	0.0393479	0.1513	0.109708	0.126406	0.147567	0.271041	0.0397759	0.244517	0.130607	0.148645	0.022032					0.148645	0.146874													0.157313	0.181053	0.21209
-30		0.444791	0.44399	0.185816	0.335165	0.324835	0.382125	0.335023	0.486894	0.216957	0.48505	0.349696	0.362758	0.030117					0.362758	0.413564													0.477948	0.470387	0.523173
-20		0.660327	0.64313	0.383092	0.509154	0.517502	0.635412	0.502818	0.673223	0.474395	0.673118	0.55902	0.566472	0.0292488					0.566472	0.654013													0.72644	0.721848	0.750775
-10		0.829472	0.8062	0.561977	0.64414	0.678023	0.792216	0.628665	0.796588	0.703572	0.823371	0.736315	0.727322	0.027296					0.727322	0.818397													0.882177	0.862418	0.86497
0		0.930389	0.913196	0.713076	0.748229	0.780435	0.883989	0.759768	0.88305	0.862817	0.92299	0.864196	0.842012	0.0233125					0.842012	0.910056													0.950884	0.949091	0.972077
10		0.974638	0.981394	0.806753	0.84548	0.875841	0.946893	0.825952	0.944206	0.956118	0.980034	0.932185	0.915409	0.0195546					0.915409	0.955404													0.931417	0.996433	0.943725
20		0.999903	0.999884	0.90334	0.917912	0.928387	0.980017	0.885322	0.979604	0.992171	0.999994	0.9866	0.961194	0.0130913					0.961194	0.970156													0.923401	0.999893	0.999641
30		0.988055	0.992407	0.947929	0.963245	0.982993	0.999769	0.930288	0.99542	0.999961	0.988915	0.989457	0.979858	0.00687818					0.979858	0.977895													0.977222	0.99443	0.972864
40		0.976922	0.967451	0.999927	0.999967	0.999684	0.978801	0.999879	0.999788	0.972786	0.963919	0.999817	0.987176	0.00454792					0.987176	0.986499													0.998979	0.998072	0.984677
Q2Q3-G256W		2018-04-19-0002	2018-04-19-0008	2018.04.19.0009	2018.04.19.0010	2018.04.19.0011	2018.04.20.0014	2018.04.20.0015	2018.04.20.0016	2018.04.26.0020	2018.04.26.0022	2018.04.26.0023	2018.04.27.0015	2018.05.04.0000	2018.05.04.0001	2018.05.04.0008		error
n=15
-80		7.74104e-05	0.019185	0.0229469	0.00890269	0.00302246	0.0152403	0.0150322	0.0134337	0.0307019	0.024386	0.00565674	0.0478662	0.0748637	5.97241e-05	0.0144153	0.0197193	0.00509984
-70		0.00109241	9.16482e-05	0.000151363	0.000285267	0.00148187	0.00023814	0.00458736	0.0028538	0.000330349	0.000226237	0.00539068	0.000424783	0.0153172	0.00333727	0.000239415	0.00240319	0.00102662
-60		0.00549073	0.019185	0.00471048	0.00177103	0.000221396	0.00023814	3.44946e-05	0.000300032	3.83149e-05	0.00810994	0.000335454	0.00179328	0.00157569	0.00534021	0.00732737	0.00376477	0.00131823
-50		0.010904	0.00963834	0.0229469	0.0516927	0.0210893	0.00537046	0.0396712	0.0670629	0.00529493	0.0185368	0.010712	0.00179328	0.0256233	0.0293755	0.0262286	0.0230627	0.00471777
-40		0.101577	0.0560989	0.135785	0.297735	0.126829	0.0902512	0.165009	0.273189	0.0888167	0.134758	0.0790905	0.103519	0.157313	0.181053	0.21209	0.146874	0.0180724
-30		0.317095	0.226666	0.395655	0.612717	0.334248	0.346078	0.393723	0.667564	0.322736	0.358808	0.345687	0.410975	0.477948	0.470387	0.523173	0.413564	0.03049
-20		0.513328	0.481245	0.721631	0.823101	0.519258	0.636646	0.586818	0.893755	0.530957	0.597099	0.633569	0.673727	0.72644	0.721848	0.750775	0.654013	0.0309881
-10		0.79685	0.707819	0.887469	0.948202	0.669395	0.822989	0.752462	0.964167	0.711142	0.7652	0.810501	0.830193	0.882177	0.862418	0.86497	0.818397	0.0223437
0		0.954851	0.843382	0.946738	1.01209	0.773875	0.897605	0.849679	0.999919	0.794663	0.872266	0.929166	0.904548	0.950884	0.949091	0.972077	0.910056	0.0183622
10		0.999511	0.999312	0.999737	1.02338	0.858887	0.931952	0.925605	0.996271	0.865044	0.93203	0.97759	0.950165	0.931417	0.996433	0.943725	0.955404	0.0128192
20		0.993421	0.935667	0.9872	0.992478	0.903844	0.999857	0.975419	0.986056	0.927831	0.972211	0.986104	0.969324	0.923401	0.999893	0.999641	0.970156	0.00818526
30		0.991391	0.963034	0.978082	0.999015	0.964067	0.989197	0.989345	0.969274	0.950318	0.97806	0.999673	0.952445	0.977222	0.99443	0.972864	0.977895	0.00411451
40		0.948085	0.977672	0.949017	0.99961	0.999781	0.977748	0.99979	0.973652	0.999672	0.999677	0.991159	0.999887	0.998979	0.998072	0.984677	0.986499	0.004663

## Sheet: hetero current density summary
Q2Q3		2018.04.26.0012	2018.04.26.0012	2018.04.26.0014	2018.04.26.0017	2018.04.26.0019	2018.04.27.0014	2018.05.03.0001	2018.05.03.0005	2018.05.03.0006	2018.05.03.0007	2018.05.03.0008
n=11
-80		-0.218496	-0.36767	0.246538	-0.431253	0.150852	-0.0677711	0.110143	-0.686695	-0.355271	0.0657174	-0.0304878	-0.144036	0.0875925
-70		0.0304878	0.136292	0.185748	-0.710299	-0.116788	0.32003	0.125512	0.55794	-0.355271	0.517525	0.0304878	0.0656058	0.110753									Q2Q3	Q2Q3-G256W	Q3G256W
-60		0.528455	0.291601	-0.0607903	1.98376	-0.180049	0.459337	0.422643	1.93133	-0.215492	0.232749	0.0609756	0.495866	0.23071
-50		2.94715	2.47544	0.45255	2.81583	0.681265	1.17093	1.51639	7.79506	-0.104834	4.52903	2.54065	2.43813	0.670369									-0.144036	0.108685	0.0399988
-40		19.3547	16.7132	3.23539	18.0518	8.13625	9.6988	11.4447	29.6674	3.73326	23.9841	17.8963	14.7196	2.50051									0.0656058	0.141624	0.0401513
-30		57.8404	47.9778	17.8521	53.6631	29.1971	34.8833	32.4103	65.9818	26.3075	57.9436	56.9411	43.7271	4.84142									0.495866	0.381413	0.178759
-20		104.487	84.8875	44.7315	93.5515	55.5085	68.942	58.4862	108.058	70.4892	94.477	107.398	81.0015	6.78426									2.43813	0.964328	0.410901
-10		153.516	125.515	74.8058	141.639	84.6472	100.444	86.7853	150.59	121.642	133.135	167.785	121.864	9.41763									14.7196	5.5313	0.717065
0		197.495	163.876	108.362	185.738	112.832	126.713	119.068	190.671	169.208	170.052	225.783	160.891	11.7563									43.7271	18.6738	1.47964
10		232.978	198.216	141.55	237.484	141.674	151.992	146.96	228.75	211.369	200.737	272.271	196.725	13.6494									81.0015	35.5401	2.78927
20		264.67	225.065	173.519	290.188	169.207	174.925	175.961	264.244	245.952	227.913	318.049	229.972	15.6299									121.864	53.4907	3.68826
30		291.032	248.241	201.307	338.899	197.421	194.066	204.275	298.267	268.596	247.081	349.151	258.031	16.9894									160.891	69.3941	4.63366
40		312.774	261.03	232.391	389.066	220.234	205.35	241.155	329.866	285.48	261.788	383.486	283.875	18.9838									196.725	83.5186	4.94914
																							229.972	95.219	5.64013
Q2Q3G256W		2018-04-19-0002	2018-04-19-0008	2018.04.19.0009	2018.04.19.0010	2018.04.19.0011	2018.04.20.0014	2018.04.20.0015	2018.04.20.0016	2018.04.26.0020	2018.04.26.0022	2018.04.26.0023	2018.04.27.0015	2018.05.04.0000	2018.05.04.0001	2018.05.04.0008							258.031	106.091	6.16204
n=15																							283.875	116.827	6.57053
-80		-0.0295858	-0.240432	0.182358	0.209364	0.87963	-0.166602	0.332551	0	0.503894	0	-0.0660308	0.214509	-0.200651	0.0800356	-0.0687679	0.108685	0.0764186
-70		0.512821	0.269872	0.0508906	0.186525	-0.406379	-0.0464936	0.144757	0.171629	0.10994	0.2053	0.0660308	0.167707	0.130152	0	0.561605	0.141624	0.0581097
-60		0.389546	-0.0883219	0.0763359	0.118005	3.98663	-0.0929872	0.453834	-0.192644	0.476409	-0.182904	-0.0880411	0.167707	0.298265	-0.053357	0.452722	0.381413	0.264891
-50		0.784024	0.0588813	0.131467	2.185	3.42078	0.143355	1.60016	0.297723	0.613834	0.522583	0.359501	0.26131	0.395879	1.62739	2.06304	0.964328	0.255798
-40		3.85108	0.598626	1.16624	12.1736	16.1368	2.88648	11.7019	2.30823	3.66468	5.90146	2.43947	2.07098	1.19306	11.8052	5.07163	5.5313	1.27581
-30		15.3501	3.14524	6.93808	30.5976	48.4465	12.7935	35.9859	10.6235	15.4879	18.589	14.4644	8.78315	5.42842	39.0262	14.447	18.6738	3.48522
-20		28.501	12.1295	16.8236	49.4404	85.9979	27.7644	67.1244	19.3485	31.9285	35.95	32.3551	18.2098	11.551	70.9693	25.0086	35.5401	5.88486
-10		54.7732	22.5221	25.4198	64.5679	129.918	42.2123	101.917	26.2312	50.0458	54.86	52.4615	27.0905	17.2451	100.849	32.2464	53.4907	8.63204
0		78.4024	33.6605	29.9746	78.1119	170.643	51.1275	134.988	32.6655	65.4512	72.4263	68.9618	33.2332	20.423	128.693	42.149	69.3941	11.3838
10		93.0276	43.9058	36.3401	88.9836	215.725	59.0236	167.703	35.5727	81.5025	87.7604	82.1497	39.6841	23.1345	153.388	44.8768	83.5186	14.367
20		101.302	46.6585	39.525	95.4663	254.311	69.5971	199.511	38.1821	97.9432	102.113	94.193	44.064	24.7234	169.453	51.2436	95.219	16.9987
30		112.983	52.6202	42.4003	103.993	300.874	75.3661	222.41	39.0578	109.739	112.979	102.66	46.014	27.077	187.368	55.8223	106.091	19.8726
40		117.318	57.2326	42.8117	114.263	342.191	79.4343	246.745	44.8932	126.294	125.943	111.324	52.656	31.0792	201.992	58.235	116.827	22.4284
Q3G256W		2018-04-20-0000	2018-04-20-0002	2018-04-20-0003	2018.04.20.0005	2018.04.20.0006	2018.04.20.0009	2018.04.20.0010	2018.04.26.0003	2018.04.26.0005	2018.04.26.0006	2018.04.26.0008	2018.04.26.0009	2018.04.27.0000	2018.04.27.0006
n=14
-80		-0.143785	0.0409137	0.115274	-0.0852273	-0.128686	0.269675	0.0287356	0.0344828	0.277778	0.375276	-0.217702	-0.0814111	-0.148833	0.223493	0.0399988	0.0500503
-70		-0.0834879	0.0818275	0.643612	0.696023	-0.294906	-0.506329	-0.114943	0.0344828	-0.379819	-0.189845	0.392577	0.248756	0.0965406	-0.0623701	0.0401513	0.0954178
-60		0.0556586	0	0.177714	0.56108	0.391421	0.302697	0.114943	0.103448	0.0340136	-0.189845	0.371163	-0.167345	0.269509	0.47817	0.178759	0.0609052
-50		0.394249	0.187521	0.850144	1.12926	0.718499	0.0330215	0.761494	0.735632	0.209751	0.216336	0.132049	0.497512	0.0482703	-0.161123	0.410901	0.100745
-40		0.621521	0.354586	1.29203	0.951705	0.75067	0.539351	0.847701	0.735632	0.413832	0.459161	0.546039	0.940751	0.442478	1.14345	0.717065	0.0767196
-30		0.310761	1.62291	2.28626	4.20455	1.53887	1.34287	0.905172	0.948276	0.623583	0.781457	0.960029	1.07644	1.00563	3.10811	1.47964	0.283489
-20		0.96475	3.74702	4.57253	7.10938	3.10992	2.71877	1.43199	2.45402	1.41723	1.56291	2.3733	2.26142	1.10619	4.22037	2.78927	0.450096
-10		0.649351	5.0358	5.48031	8.97017	2.81501	4.60099	1.81034	3.71839	2.31859	2.2649	3.98644	2.62325	1.71762	5.64449	3.68826	0.57474
0		2.00835	6.38936	5.77329	10.5753	4.18767	6.01541	2.65805	3.82184	2.69841	2.83002	4.70378	3.47806	2.62671	7.10499	4.63366	0.627749
10		1.89703	7.34743	6.97887	11.2287	3.89276	6.21354	2.13602	4.13793	2.90816	2.53422	5.6424	3.22931	2.79968	8.342	4.94914	0.739296
20		2.15213	8.05319	7.38713	12.3082	4.05898	7.55641	3.76916	5.33333	2.73243	2.66667	6.38116	3.83537	3.24216	9.48545	5.64013	0.801478
30		2.29128	9.23969	7.91547	13.0469	4.71314	9.0699	3.36207	5.92529	3.42404	3.2053	7.34118	2.78607	3.38697	10.5613	6.16204	0.906213
40		3.08442	8.82373	8.70797	13.6577	5.36729	9.43864	4.41571	5.57471	3.56576	3.90728	7.3626	3.72682	3.63234	10.7225	6.57053	0.870903

## Sheet: WT 2018.04.26.0014
0	-18.8492	-17.5945	-12.5655	-12.2162	-10.9486	-14.6954	-12.8775	-17.2947	-10.5252	-14.8795	-10.182	-9.03026	-10.2011
0.5	-19.14	-18.3294	-11.8926	-12.8766	-11.1858	-14.0198	-12.1904	-14.4767	-10.542	-15.202	-11.3934	-9.15649	-10.3155
1	-19.1587	-18.3159	-12.2322	-13.7933	-11.6863	-13.7202	-11.0332	-14.0336	-10.7471	-14.9709	-11.9176	-10.7005	-11.0432
1.5	-18.3863	-18.3246	-12.3162	-10.9136	-11.6532	-15.1484	-11.3139	-14.4138	-11.926	-13.2582	-12.6332	-9.72166	-10.6245
2	-19.5527	-17.4577	-13.0004	-11.5124	-10.755	-14.2332	-13.0602	-12.156	-11.3374	-13.9378	-13.07	-10.1663	-11.2704
2.5	-18.8532	-16.1102	-13.2497	-10.8614	-9.9119	-14.781	-13.7893	-11.973	-12.0921	-13.7352	-11.4172	-10.5912	-12.7245
3	-19.7191	-17.1327	-13.7015	-12.0207	-9.21693	-14.5662	-13.0336	-13.5194	-11.2966	-12.7585	-10.756	-11.775	-11.95
3.5	-19.0637	-17.5912	-13.2901	-12.1422	-10.8117	-13.3067	-13.8309	-13.4455	-11.2255	-14.0076	-11.0587	-10.923	-13.1357
4	-19.9677	-18.112	-14.4914	-10.4337	-11.7432	-12.8169	-13.6687	-14.5662	-11.9913	-14.0503	-13.7474	-10.705	-14.022
4.5	-19.9076	-16.8754	-12.9874	-12.0232	-11.1605	-12.6875	-12.922	-13.3547	-9.62586	-14.2051	-12.3297	-11.0784	-13.4056
5	-20.4067	-16.5497	-11.7196	-12.0342	-11.1568	-12.9361	-13.6915	-15.3354	-9.43015	-13.1125	-11.5725	-11.7923	-11.9553
5.5	-19.9038	-16.6524	-12.0963	-13.3769	-10.8195	-12.4715	-13.6021	-14.044	-11.5801	-14.2845	-10.7146	-11.3306	-13.0048
6	-18.7243	-16.2258	-13.6756	-12.7776	-11.3173	-13.4917	-13.8988	-15.1007	-11.7609	-13.1754	-11.8598	-9.95714	-12.5318
6.5	-17.745	-16.5979	-13.8915	-12.085	-10.8572	-13.7665	-12.8582	-15.1311	-10.4469	-13.0064	-12.0367	-9.83473	-12.2856
7	-19.0777	-14.964	-11.6491	-12.8284	-12.458	-13.4881	-12.8146	-15.1308	-10.6883	-15.407	-10.6066	-10.4034	-13.9871
7.5	-17.8455	-14.8156	-11.9561	-13.4181	-11.7919	-12.262	-12.1294	-15.8855	-12.6334	-14.5158	-11.3846	-10.006	-13.6369
8	-17.3581	-14.8096	-13.7085	-12.7198	-11.0903	-12.2896	-12.619	-15.4997	-12.2694	-12.5508	-11.0444	-10.2787	-11.6149
8.5	-18.4092	-15.1048	-13.1875	-13.6456	-10.0892	-12.7961	-13.6939	-15.2066	-12.155	-13.1919	-12.1018	-10.4974	-12.1954
9	-19.2488	-16.3493	-12.909	-12.4118	-12.6848	-13.0376	-13.2894	-13.9532	-12.1652	-15.644	-12.5168	-10.9094	-12.1642
9.5	-20.1024	-16.1731	-12.675	-11.4881	-14.125	-13.3077	-13.0853	-14.003	-12.4076	-15.6934	-12.0217	-11.1913	-12.9722
10	-18.5296	-16.2847	-13.1795	-12.4102	-12.7028	-14.4571	-11.2774	-15.0681	-11.8022	-14.8137	-13.2557	-9.25871	-12.8855
10.5	-16.8322	-17.914	-13.7757	-12.0405	-11.942	-13.7363	-12.6331	-15.3138	-10.4715	-15.6362	-13.4032	-9.61042	-12.0093
11	-17.9868	-16.9047	-14.5706	-11.104	-13.3608	-13.7553	-12.6314	-13.9709	-11.6672	-15.466	-14.3619	-10.0072	-11.2797
11.5	-18.4405	-16.525	-12.7482	-13.1716	-12.6256	-14.3622	-13.0187	-13.4085	-10.5978	-14.9179	-14.5627	-9.5158	-11.1993
12	-17.9516	-16.7548	-13.1074	-13.593	-12.0715	-15.1646	-12.6644	-14.9306	-11.3555	-15.3661	-13.7889	-10.1255	-11.1149
12.5	-17.4782	-16.3732	-12.9765	-14.2948	-11.1103	-14.9436	-12.2047	-14.9105	-11.6452	-14.3611	-12.7588	-10.0452	-10.5945
13	-17.1559	-16.2341	-13.5674	-14.5485	-11.2846	-13.1737	-12.5771	-15.1424	-9.5585	-14.4306	-14.0472	-10.4598	-11.1461
13.5	-19.4771	-15.5669	-12.6567	-13.9515	-12.312	-13.6404	-10.814	-14.6859	-10.848	-14.2088	-14.3925	-11.2088	-10.8216
14	-19.0852	-17.7201	-12.2243	-12.3763	-10.9341	-14.5177	-12.5624	-15.393	-10.0586	-13.7841	-12.3157	-11.0825	-10.3047
14.5	-19.7625	-17.0177	-12.7275	-11.9428	-11.4468	-13.1638	-11.9502	-14.5167	-10.1087	-14.5329	-12.8188	-11.6364	-11.703
15	-19.1384	-17.3724	-13.4188	-12.6267	-11.4736	-14.5324	-12.8575	-13.7524	-10.7642	-13.7607	-14.0388	-11.3698	-11.0012
15.5	-19.5502	-16.9631	-12.9864	-12.2289	-10.0092	-13.9296	-11.5221	-14.0178	-9.73517	-13.5651	-12.7724	-12.0141	-12.1414
16	-21.3881	-18.2819	-11.8984	-13.3498	-10.5685	-13.512	-12.3287	-11.242	-9.35773	-12.9658	-12.4659	-12.0332	-11.8317
16.5	-20.3357	-17.3539	-12.4813	-13.8972	-11.1013	-13.0106	-12.5579	-12.1733	-8.86283	-13.1393	-11.5392	-11.9682	-11.6953
17	-20.9138	-17.4665	-13.2063	-11.6077	-11.0469	-15.2844	-11.995	-11.9245	-10.9725	-12.7934	-12.5636	-11.8434	-13.2391
17.5	-19.4476	-16.749	-12.4435	-11.3248	-11.7478	-13.7637	-11.6186	-12.7082	-9.6356	-12.1954	-10.8456	-12.1084	-13.0479
18	-20.5015	-17.4074	-12.2036	-11.9236	-12.0042	-13.9895	-13.2876	-12.0644	-9.96266	-13.9319	-10.8035	-11.3173	-13.2401
18.5	-20.4816	-16.1903	-12.5657	-13.6114	-12.1887	-14.5937	-13.5129	-12.9001	-10.5613	-14.8178	-11.4328	-11.3629	-11.9863
19	-19.0268	-16.4315	-11.6852	-12.5899	-12.4655	-15.4821	-13.3833	-13.2402	-10.2257	-13.8106	-11.8831	-11.3075	-13.8003
19.5	-19.8927	-16.2288	-10.9059	-12.2635	-11.8134	-14.9744	-12.8207	-12.1577	-11.7292	-12.8991	-12.0654	-12.2247	-11.8092
20	-20.4528	-15.4034	-11.3278	-13.2928	-11.6053	-14.8695	-13.9766	-12.5027	-11.5293	-14.2226	-12.3105	-12.2579	-12.758
20.5	-19.2804	-15.253	-10.7855	-11.911	-11.2724	-13.7677	-14.205	-14.4519	-11.1664	-12.8019	-11.74	-11.2158	-13.2624
21	-19.6342	-15.654	-11.7874	-11.255	-11.5909	-14.0536	-14.5668	-13.6934	-10.7367	-12.7761	-11.0133	-9.6677	-12.4548
21.5	-18.2454	-18.0148	-12.3483	-11.438	-11.6887	-13.2167	-13.8634	-13.9001	-10.7924	-13.8932	-11.5263	-10.1093	-13.3331
22	-19.2169	-16.7732	-11.7874	-12.7669	-11.0841	-13.3927	-13.2701	-13.4015	-11.3746	-15.123	-10.7091	-10.3378	-11.3246
22.5	-19.5918	-14.9795	-11.1402	-13.1347	-12.1118	-14.2209	-12.9595	-12.6349	-11.0265	-14.9829	-11.7458	-9.46496	-12.2876
23	-20.0864	-16.1926	-11.8494	-14.5323	-12.0878	-13.1281	-13.4734	-14.0864	-10.8437	-13.6097	-12.1384	-11.5564	-12.2795
23.5	-19.448	-16.4592	-10.4501	-13.0768	-11.5242	-12.669	-13.7572	-15.5407	-11.367	-10.9829	-13.8203	-10.1666	-12.2891
24	-18.7615	-14.9562	-11.1055	-13.0745	-12.4075	-13.1287	-12.5964	-15.0353	-12.7411	-14.8257	-13.1951	-9.25628	-13.1275
24.5	-19.7504	-14.6556	-10.6601	-12.5023	-14.9053	-12.6973	-13.4761	-13.5572	-11.0529	-15.5661	-13.0661	-8.15696	-12.6637
25	-19.1492	-15.1576	-11.927	-11.9275	-13.5574	-13.4353	-12.8583	-14.2587	-11.6246	-15.4931	-13.3934	-9.66051	-11.5704
25.5	-18.5773	-15.9725	-12.5398	-14.1697	-12.6968	-13.8042	-12.5333	-14.6831	-10.3314	-14.7416	-13.013	-8.64678	-13.082
26	-19.2473	-15.5246	-12.4529	-15.2909	-13.2351	-13.0873	-13.4415	-16.0135	-12.4947	-15.2509	-12.9862	-9.06562	-12.3788
26.5	-18.6626	-14.4104	-13.4328	-13.9751	-13.0367	-12.9674	-12.4798	-15.2279	-11.2221	-14.708	-13.1701	-10.2459	-11.1317
27	-17.5616	-15.4102	-14.2211	-13.7155	-14.3323	-13.4585	-11.7171	-15.4759	-12.3298	-14.5882	-12.0148	-8.57683	-11.5072
27.5	-19.273	-15.8468	-14.241	-14.8525	-13.2951	-12.7859	-11.3753	-15.9188	-12.4699	-15.5813	-12.8553	-8.81928	-13.0755
28	-19.5687	-15.1371	-12.0346	-14.7467	-14.1521	-12.965	-10.6622	-14.4788	-11.4773	-15.9102	-13.0776	-9.30272	-12.2235
28.5	-18.3795	-15.4166	-11.7476	-13.3254	-14.0486	-13.4285	-11.1801	-14.8978	-12.0308	-14.9901	-13.7345	-9.64527	-11.3912
29	-20.4557	-16.4786	-14.0116	-12.8465	-12.8997	-14.3102	-12.1131	-14.9986	-11.4527	-14.5567	-13.725	-9.9111	-10.9903
29.5	-19.1771	-16.0677	-12.1615	-13.8707	-11.618	-14.5602	-11.6057	-14.772	-11.7246	-15.1091	-14.6249	-10.7837	-11.3361
30	-18.475	-16.6403	-14.0565	-14.0679	-12.6262	-14.496	-12.7314	-14.1157	-10.9771	-15.535	-12.5052	-10.4753	-12.0678
30.5	-19.2294	-16.3217	-14.2397	-12.6708	-12.6576	-14.1916	-13.3606	-13.5395	-11.839	-15.5838	-11.7386	-11.4031	-12.0423
31	-20.2982	-17.9187	-12.9582	-13.6278	-12.0225	-15.6096	-11.8362	-13.7834	-11.2323	-15.4421	-12.769	-9.99644	-11.047
31.5	-20.7247	-17.0578	-12.5126	-13.3408	-11.7042	-14.6997	-11.3084	-14.3859	-10.7937	-15.2896	-13.5739	-9.93743	-9.84502
32	-18.0688	-18.46	-12.0619	-12.2745	-13.3292	-15.4018	-10.3017	-14.1915	-11.6173	-15.359	-11.8262	-9.39745	-12.2971
32.5	-18.9102	-18.6391	-13.7212	-12.5812	-12.4665	-13.0268	-10.5072	-14.5	-9.55667	-14.3276	-12.2108	-10.6873	-12.1067
33	-19.2176	-15.5401	-13.7582	-12.3979	-9.92916	-13.3693	-12.4731	-15.298	-8.67673	-13.6269	-11.3481	-11.8138	-12.1844
33.5	-20.8395	-15.093	-13.1044	-12.1881	-8.99033	-12.8282	-12.6283	-15.5889	-8.71482	-13.272	-11.0266	-10.8546	-12.0413
34	-20.7468	-15.3531	-11.3187	-13.508	-9.64954	-13.8653	-10.4358	-14.1389	-11.047	-15.1559	-12.0129	-11.2879	-12.4138
34.5	-21.4551	-18.3247	-11.7346	-12.9742	-10.9999	-13.546	-11.9882	-13.2689	-11.4945	-14.6825	-13.2612	-10.808	-12.0316
35	-19.772	-17.9075	-12.3192	-12.5505	-10.8719	-13.063	-12.4419	-12.844	-10.9531	-13.8902	-12.1495	-11.581	-12.9498
35.5	-19.4967	-15.8253	-12.1326	-10.7336	-11.2246	-14.1428	-11.4918	-12.898	-9.92076	-15.043	-12.3465	-11.5886	-12.91
36	-19.559	-16.6677	-12.1006	-11.1046	-11.2414	-15.1523	-11.7086	-13.2269	-9.30294	-14.7895	-11.0802	-11.0604	-14.379
36.5	-20.3337	-16.11	-12.9034	-12.2367	-10.801	-13.3065	-13.6389	-13.6612	-9.74967	-13.3202	-12.8382	-11.3463	-13.46
37	-20.4392	-15.0931	-12.9223	-11.3936	-9.62741	-14.4755	-14.0888	-13.18	-8.84796	-13.4726	-13.3285	-10.4906	-13.584
37.5	-20.387	-14.6523	-10.9095	-10.7519	-10.1323	-13.7047	-13.3692	-12.8645	-10.868	-12.756	-12.6487	-11.387	-14.598
38	-20.1351	-14.6337	-11.549	-12.6151	-10.2842	-12.8324	-12.2576	-15.0263	-9.77759	-13.7505	-12.1021	-11.5218	-14.9339
38.5	-19.4966	-15.7916	-11.8198	-12.797	-8.46271	-13.0189	-12.4388	-15.118	-8.20891	-14.0923	-11.2911	-11.6714	-13.7909
39	-19.3189	-17.066	-12.2995	-13.7352	-9.8077	-13.4543	-13.0367	-14.4281	-10.4198	-13.6006	-11.587	-11.125	-13.1548
39.5	-18.9862	-17.0665	-11.7367	-12.837	-11.2807	-13.513	-13.7138	-13.026	-11.7029	-17.5538	-11.9327	-11.3793	-13.2049
40	-18.569	-16.7751	-11.3514	-12.6529	-10.2192	-12.3326	-12.8822	-14.7967	-10.8871	-15.8919	-12.2363	-10.0307	-12.3775
40.5	-18.908	-15.6971	-11.0551	-11.4987	-11.9188	-13.4576	-11.7733	-14.8267	-8.82676	-13.1948	-12.5008	-10.4957	-13.3845
41	-19.8159	-14.9965	-12.9144	-12.5285	-12.8375	-13.8274	-12.3008	-15.4673	-11.0885	-14.0797	-12.111	-10.1103	-13.4693
41.5	-20.1931	-14.3979	-11.6284	-14.4844	-12.8407	-13.0986	-12.0355	-15.2781	-10.8335	-12.7991	-13.8762	-10.3503	-12.6565
42	-18.9537	-15.7456	-11.9271	-13.0393	-13.9008	-14.1903	-11.362	-14.4076	-11.3493	-14.2599	-13.7789	-9.21397	-12.2276
42.5	-18.2998	-15.446	-12.7731	-12.7397	-13.1988	-14.9858	-10.8468	-13.7585	-11.2607	-14.2899	-13.8988	-9.63643	-11.6365
43	-17.8517	-15.3594	-10.8794	-12.4457	-12.3035	-14.3608	-10.0639	-14.278	-11.5057	-13.7685	-13.7806	-9.94399	-12.383
43.5	-19.3311	-15.2283	-11.6415	-13.3547	-13.7445	-13.5327	-12.3397	-15.8424	-11.7911	-14.4652	-12.5468	-10.3133	-11.6326
44	-16.6104	-15.3831	-11.8372	-13.8234	-13.2199	-12.929	-11.9523	-14.8654	-12.7466	-14.8368	-14.2314	-10.5897	-11.3744
44.5	-17.7193	-15.3768	-11.3153	-12.5352	-13.1845	-13.6116	-10.776	-13.3342	-12.2959	-15.1527	-13.4444	-8.67682	-11.6839
45	-18.3537	-16.0235	-12.3926	-11.3628	-11.6432	-13.4862	-11.2435	-15.289	-11.8619	-15.7486	-12.4733	-9.77918	-12.5117
45.5	-18.6898	-14.1935	-12.2834	-14.5172	-11.0261	-13.5612	-12.441	-14.3219	-12.4805	-16.2431	-12.973	-11.3577	-10.8374
46	-19.1064	-15.6776	-13.435	-13.5983	-10.7032	-15.1309	-12.4199	-14.5677	-12.4914	-16.5551	-12.0144	-11.6473	-10.7043
46.5	-17.5758	-16.4318	-13.0583	-12.2679	-10.9732	-14.5141	-12.5629	-14.5843	-11.7959	-14.776	-12.5003	-9.62885	-11.7449
47	-19.0837	-16.4386	-13.1508	-13.234	-11.5221	-14.335	-10.7071	-14.1211	-11.649	-15.386	-12.5451	-10.4841	-11.3248
47.5	-19.2809	-16.1236	-12.5378	-13.53	-11.6706	-15.2541	-10.8616	-14.2398	-11.2948	-16.5896	-13.2469	-10.2597	-11.5955
48	-19.4331	-17.2938	-12.6162	-12.6937	-11.1228	-15.8237	-11.8504	-12.6618	-11.603	-14.9768	-13.0726	-9.82007	-9.39409
48.5	-19.2656	-15.9634	-12.8057	-11.6464	-10.3669	-14.0736	-12.1012	-12.1571	-10.9996	-15.2848	-12.3727	-10.6154	-11.1716
49	-18.7616	-17.233	-11.8944	-12.6007	-10.3447	-14.8253	-11.7709	-14.7673	-11.2525	-14.3488	-13.5428	-10.526	-11.5071
49.5	-19.7303	-16.5447	-11.3538	-13.1999	-9.01765	-15.9205	-11.8046	-15.2034	-10.6546	-14.1478	-11.5043	-11.6877	-10.6796
50	-19.7464	-16.324	-11.6395	-13.0068	-10.4652	-15.9826	-12.1193	-14.0442	-11.5371	-14.5786	-9.97527	-12.2578	-10.6714
50.5	-19.2175	-15.716	-13.5643	-13.2044	-10.5223	-14.813	-12.7002	-13.7326	-10.882	-13.681	-11.0976	-13.0581	-11.4061
51	-19.3301	-15.1103	-11.4571	-12.1028	-10.998	-14.0817	-13.1431	-12.8125	-11.2161	-14.7486	-10.6458	-10.5401	-12.5658
51.5	-20.1424	-16.2639	-12.2899	-12.8964	-10.8037	-13.9446	-12.3412	-13.7304	-11.8352	-14.5945	-10.714	-12.1629	-11.7284
52	-20.2794	-17.7001	-12.5236	-11.3315	-10.8182	-15.1992	-13.8514	-13.4392	-9.97404	-14.8996	-12.5317	-11.5187	-12.9583
52.5	-19.6295	-16.1209	-11.5404	-11.7361	-10.0759	-14.9139	-13.4556	-14.5308	-11.122	-14.2542	-11.8706	-10.6273	-12.3233
53	-18.3425	-16.0295	-11.1206	-11.1665	-10.5444	-14.4109	-12.7676	-14.3824	-9.83658	-13.7146	-11.8301	-12.1828	-12.2433
53.5	-17.6541	-15.4556	-10.2379	-11.4654	-10.2991	-14.6398	-14.4926	-13.8059	-11.6855	-13.0027	-12.6201	-10.9444	-12.6685
54	-18.409	-15.8225	-10.189	-12.2074	-11.335	-14.8898	-14.1362	-15.3503	-11.4126	-13.964	-11.7035	-11.662	-12.6546
54.5	-18.9302	-15.359	-11.1162	-11.963	-11.2021	-14.7273	-13.2979	-14.2817	-9.63589	-15.3682	-13.639	-10.9387	-12.7497
55	-18.1428	-15.985	-10.0453	-11.8499	-9.99465	-12.8228	-13.8099	-12.4153	-9.78033	-16.6922	-13.8207	-11.114	-13.3282
55.5	-18.3096	-15.2541	-9.24062	-13.4098	-9.65552	-12.9237	-14.4613	-14.0799	-9.7746	-16.2948	-13.3553	-11.945	-11.6218
56	-17.7798	-14.9996	-11.2018	-12.6414	-12.5803	-13.2023	-13.5156	-15.4545	-11.2765	-16.9251	-11.8228	-10.1094	-12.7948
56.5	-18.5682	-16.6148	-13.5091	-13.1819	-11.5821	-13.1648	-13.6351	-14.2767	-10.3944	-16.1536	-12.023	-9.79939	-12.2574
57	-19.5526	-14.8816	-12.5303	-13.1163	-10.0978	-11.7669	-14.3003	-13.5072	-12.2441	-15.808	-11.7337	-10.3123	-11.7779
57.5	-19.5024	-15.0116	-11.6782	-14.1642	-11.3479	-14.3898	-14.2447	-15.0161	-11.1957	-15.2347	-12.0574	-10.1615	-11.725
58	-18.5774	-14.641	-10.9988	-14.4083	-11.1225	-14.3972	-13.4721	-15.6976	-10.8691	-16.2281	-11.575	-10.752	-11.5429
58.5	-17.9152	-14.5244	-10.9007	-14.9395	-11.2448	-12.3436	-12.5977	-16.0455	-11.8261	-15.4748	-11.7976	-10.4014	-11.4386
59	-20.0433	-15.287	-12.2162	-14.4311	-11.6816	-12.0267	-12.9159	-16.2638	-11.9221	-13.7907	-12.9489	-11.8176	-12.2511
59.5	-19.2287	-14.4061	-10.7751	-13.8746	-11.2035	-11.9224	-12.8547	-14.6047	-12.6124	-14.4455	-12.4719	-9.95287	-12.2651
60	-16.9684	-15.4175	-11.6036	-13.8211	-10.7703	-13.1247	-13.9032	-15.785	-11.899	-17.2946	-12.3506	-10.7973	-12.1497
60.5	-17.2684	-15.2888	-11.2185	-13.4741	-11.8221	-14.1943	-12.7202	-15.8694	-11.5872	-16.8354	-14.0234	-10.1778	-11.5896
61	-19.1367	-15.8743	-13.1926	-14.4276	-11.0147	-12.0771	-13.5145	-14.9657	-11.1499	-15.6701	-13.8244	-10.4167	-11.0248
61.5	-18.7114	-15.7231	-12.8023	-13.0891	-11.5713	-14.4731	-11.5083	-15.0897	-12.0862	-13.9751	-13.3015	-9.90229	-11.334
62	-18.9836	-16.9367	-11.5611	-13.0496	-12.1106	-13.9708	-11.4454	-13.1776	-10.6375	-13.1856	-13.5499	-11.3498	-9.98537
62.5	-17.2391	-16.2154	-12.0756	-12.9457	-11.7136	-14.6057	-12.0257	-14.1845	-11.0169	-13.774	-13.2844	-10.3405	-10.9712
63	-19.267	-15.2939	-12.9806	-13.752	-11.3976	-14.8129	-11.8288	-14.0838	-10.335	-14.8361	-12.658	-10.9078	-11.4023
63.5	-19.6649	-15.1051	-11.1182	-12.3194	-11.8712	-12.2474	-12.3491	-13.1632	-10.2362	-14.9047	-12.3596	-11.4842	-11.6682
64	-18.8135	-15.5864	-11.126	-14.1665	-10.6816	-15.4019	-12.106	-12.0667	-11.2101	-15.253	-11.8073	-11.6876	-11.7265
64.5	-18.5669	-16.6429	-11.7409	-12.3867	-10.918	-15.7782	-11.1633	-15.0631	-12.2788	-15.329	-13.5709	-12.1437	-10.6523
65	-18.2963	-16.6996	-11.6325	-13.7333	-11.6546	-14.6358	-11.3108	-13.9594	-10.6154	-14.0942	-14.4774	-11.1678	-11.7385
65.5	-19.2697	-15.6514	-11.4275	-12.7595	-11.4924	-14.7956	-12.0874	-14.0752	-11.0773	-13.2413	-14.0128	-11.4452	-11.8769
66	-18.9922	-15.3285	-12.1021	-13.9244	-10.4777	-14.386	-12.5003	-13.7395	-11.2099	-14.0684	-14.0535	-10.2804	-11.9585
66.5	-19.199	-16.6438	-11.7037	-14.6589	-9.54732	-13.7204	-13.0581	-14.7698	-11.1656	-12.3486	-13.0307	-11.5367	-11.9737
67	-19.2317	-15.7376	-10.5269	-12.7301	-10.3559	-14.1916	-12.3834	-14.73	-11.8312	-13.1877	-11.4937	-10.9171	-11.014
67.5	-19.7794	-16.6003	-11.7135	-13.3081	-11.1855	-14.9262	-12.4425	-13.8086	-10.659	-13.7927	-11.1687	-11.8535	-11.2447
68	-19.0764	-16.9216	-11.088	-12.5909	-11.2604	-14.2884	-13.4655	-14.971	-10.3772	-12.8059	-12.767	-10.8053	-11.2004
68.5	-19.7312	-16.5392	-9.85975	-12.7679	-12.3346	-15.3193	-11.9808	-14.7671	-9.3402	-13.1384	-13.4057	-11.7112	-11.873
69	-18.8883	-15.7439	-11.3567	-12.2354	-11.5191	-14.2298	-13.6065	-14.5151	-10.2414	-12.3388	-12.7791	-11.5417	-11.1334
69.5	-17.7442	-16.4939	-12.6672	-11.5376	-11.6109	-12.1659	-13.6665	-14.4945	-9.68307	-12.4528	-13.0542	-12.865	-12.551
70	-19.6947	-16.2273	-10.2089	-13.2074	-12.1533	-14.8643	-14.5355	-13.5964	-10.2639	-12.993	-12.4704	-11.9495	-12.6334
70.5	-19.8115	-14.3984	-9.78068	-13.271	-12.0149	-14.2291	-12.8689	-14.7423	-9.69806	-12.3425	-13.1139	-11.4538	-12.0942
71	-18.6166	-14.1455	-11.9042	-13.7124	-14.392	-12.8173	-13.5187	-14.0871	-9.80398	-12.7509	-11.6683	-12.7632	-13.2005
71.5	-18.4677	-14.4549	-11.4122	-13.4335	-13.8582	-12.9702	-13.5696	-13.5932	-9.94228	-13.2056	-12.5623	-12.2081	-14.4603
72	-16.671	-15.9602	-11.0596	-13.6527	-14.7819	-11.7028	-12.1921	-15.9841	-10.4942	-13.6203	-12.3847	-12.0479	-12.4476
72.5	-16.4366	-14.957	-12.012	-14.5901	-14.9344	-12.2304	-13.6469	-14.6757	-10.5945	-14.2951	-11.5145	-11.0106	-13.5478
73	-17.2807	-15.7521	-9.74144	-14.0764	-14.1471	-12.9354	-13.7973	-14.8483	-10.3738	-15.1765	-13.9816	-10.1151	-13.3859
73.5	-16.775	-14.3778	-11.0196	-13.9326	-13.989	-14.835	-13.1151	-15.1268	-10.5913	-15.4569	-13.708	-10.4818	-11.8702
74	-18.0328	-15.1999	-12.1147	-14.5024	-12.2103	-15.444	-14.5211	-14.135	-9.8287	-16.5418	-12.68	-9.88431	-11.8251
74.5	-17.8188	-15.2599	-11.4076	-13.0352	-10.8114	-15.7354	-13.2675	-15.2668	-10.6197	-14.87	-13.933	-9.1174	-11.2151
75	-16.1946	-15.0963	-10.9495	-14.0861	-13.0426	-14.005	-13.8814	-15.9203	-10.6353	-14.2656	-13.2466	-9.41061	-12.302
75.5	-17.4631	-14.9706	-12.2299	-15.249	-13.4458	-14.2222	-12.8956	-15.7906	-11.0054	-13.7373	-13.6995	-9.34759	-11.6238
76	-17.8005	-14.9845	-11.0395	-15.7024	-12.2649	-14.504	-12.7673	-15.4759	-10.862	-14.5366	-13.2857	-10.6171	-13.0473
76.5	-17.6819	-15.9232	-11.7972	-14.0732	-12.3048	-13.3543	-13.0555	-14.3023	-11.7959	-13.7414	-12.8122	-10.5606	-13.6354
77	-17.3346	-14.778	-11.6534	-14.599	-11.6844	-13.2732	-14.0581	-14.7785	-11.1309	-14.5797	-12.5816	-11.451	-14.9807
77.5	-18.9036	-16.432	-12.2843	-14.8847	-12.8673	-13.6268	-12.4959	-15.3586	-10.8029	-16.3748	-11.3836	-9.97202	-14.1359
78	-19.5668	-16.66	-12.0902	-15.8159	-12.3113	-13.7092	-11.9771	-14.6714	-10.7929	-14.6685	-12.612	-10.3315	-13.2114
78.5	-18.5125	-15.8117	-11.0789	-14.7063	-11.2217	-14.3394	-13.1509	-14.3743	-11.2274	-14.9298	-12.8876	-9.84741	-11.8539
79	-18.1512	-16.5077	-12.9956	-14.1616	-12.356	-14.4735	-11.9516	-13.0008	-10.0966	-15.4772	-12.8656	-11.3324	-12.288
79.5	-18.5344	-14.5361	-10.1254	-9.85813	-7.90383	-7.21619	-1.58656	-0.371671	4.96249	4.35217	6.76575	12.9349	12.7864
80	-18.1982	8.77287	48.6268	86.3531	149.789	226.752	290.808	357.699	452.856	544.231	601.121	659.664	729.297
80.5	-17.4104	13.1206	51.6046	86.3111	137.196	183.749	216.145	255.147	307.723	376.583	404.312	453.365	465.899
81	-18.0196	-16.304	-22.5233	-35.8762	-61.2704	-107.308	-148.294	-191.875	-255.685	-304.848	-365.609	-374.48	-427.643
81.5	-17.3206	-15.087	-15.2938	-21.2092	-29.7323	-47.7399	-61.6634	-93.9124	-145.371	-179.635	-202.341	-174	-172.663
82	-18.5209	-12.5246	-7.50959	-8.03225	-4.77532	-9.92424	-11.3765	-33.3889	-69.1451	-81.6975	-69.1611	-34.0937	-22.6985
82.5	-19.5762	-11.3196	-5.54178	-3.86076	3.12877	0.464112	-0.0220199	-17.6104	-41.8932	-37.7408	-17.187	7.42942	19.1468
83	-18.808	-11.0783	-5.19153	-2.85387	3.20256	2.06366	0.82472	-19.9797	-32.3347	-20.9575	1.83112	15.8765	28.5753
83.5	-18.5967	-11.6782	-6.46386	-3.48575	2.76236	-0.309959	-2.23843	-21.8229	-25.9361	-11.7115	8.91078	18.5029	27.8672
84	-19.0505	-11.5032	-6.67823	-2.2194	1.65902	-1.57359	-4.97311	-21.183	-22.5315	-7.1753	9.7235	17.0053	27.3853
84.5	-19.8877	-11.5991	-5.94949	-3.8307	0.968088	-2.37581	-4.82259	-19.938	-16.4995	-1.26125	11.8723	15.8333	26.9737
85	-17.9162	-12.4797	-5.62922	-5.4144	0.387758	-3.59045	-6.02907	-20.5913	-12.4157	0.92258	10.5207	13.8286	22.7305
85.5	-19.242	-12.4066	-4.91583	-4.29416	-0.272037	-5.13654	-8.9319	-17.9332	-13.7798	-0.495599	8.63537	12.3093	21.3741
86	-20.7714	-12.476	-7.27149	-5.30788	-1.27372	-5.19961	-8.93685	-15.93	-13.7101	-0.31632	8.4947	15.2938	22.0037
86.5	-20.4387	-13.8821	-6.65246	-6.63253	-0.994696	-5.73915	-10.1325	-18.4289	-8.0777	1.67388	8.59157	15.5732	22.1121
87	-20.8947	-12.805	-5.97218	-4.54061	-0.691594	-5.78803	-9.47755	-16.1292	-6.13784	3.93163	10.0364	15.407	19.1711
87.5	-20.4015	-11.3262	-6.06694	-5.22491	-0.997258	-5.14917	-8.39447	-11.9188	-6.50522	3.39372	8.55467	14.9657	19.322
88	-18.9769	-11.9373	-8.06672	-3.29914	-1.06454	-5.9263	-8.09502	-13.0163	-7.03947	5.19307	7.84783	14.8885	23.9815
88.5	-19.8405	-12.1885	-7.29276	-4.4553	-1.85168	-5.2908	-10.7814	-13.5728	-3.87607	5.94136	9.35062	14.6596	24.1579
89	-19.8562	-11.8074	-6.81403	-6.39849	-2.70569	-5.27375	-11.3833	-12.2672	-1.62136	5.78418	9.23865	15.2721	22.7304
89.5	-19.284	-11.9006	-7.08921	-5.50203	-4.08495	-5.75159	-10.0978	-11.0577	-2.97124	7.36029	8.97658	17.0649	27.3918
90	-19.6116	-13.2376	-6.64033	-6.2972	-5.11384	-6.50552	-8.63864	-10.9665	-2.87081	8.37374	8.73265	18.9538	31.7171
90.5	-18.0146	-12.5287	-9.00547	-6.06477	-4.64743	-6.86035	-7.89468	-9.04134	-0.501032	9.62801	6.97419	22.2806	38.8058
91	-18.9579	-14.4106	-8.11105	-7.35777	-3.61036	-8.02649	-10.6175	-7.90697	-2.02461	10.3146	7.35989	23.5729	41.998
91.5	-19.6077	-14.907	-7.7513	-7.08566	-4.62431	-10.0353	-7.95329	-9.48347	-3.44652	8.64785	10.1451	22.391	45.7778
92	-18.765	-13.0103	-9.26949	-7.4272	-3.53293	-8.70742	-9.07895	-8.24474	-6.05815	8.04597	11.2944	24.4139	45.0965
92.5	-17.9467	-11.876	-9.43997	-8.25306	-3.3261	-8.8071	-10.6706	-8.527	-5.93818	6.06607	12.4843	24.8501	49.1622
93	-18.5656	-12.7828	-9.61653	-8.9226	-3.83844	-8.91091	-10.662	-8.15507	-2.95252	6.84707	14.1268	24.9801	56.2932
93.5	-18.852	-15.5472	-9.51698	-7.76057	-6.08102	-9.63516	-12.0979	-8.9785	-3.55856	8.33818	14.8387	27.6531	65.6088
94	-18.3107	-14.9161	-8.60096	-6.91787	-5.194	-8.4383	-8.60488	-7.32969	-3.28247	12.0426	16.8594	30.1506	73.1323
94.5	-20.0429	-14.3092	-7.80587	-7.16544	-4.67517	-9.35642	-7.0432	-8.47629	-0.195575	10.0409	19.5519	32.3462	76.8993
95	-19.9355	-13.6516	-9.0545	-7.25113	-5.17053	-9.09192	-5.3698	-6.54353	0.0365111	9.72855	20.7014	37.5461	89.4787
95.5	-18.3283	-13.6284	-7.72646	-7.33755	-5.80582	-7.56278	-4.83455	-6.53253	1.77717	10.5303	21.9547	44.4037	97.6372
96	-19.4122	-13.2336	-8.49911	-7.23367	-6.36012	-9.34615	-5.42859	-5.47625	1.49121	12.6998	22.9696	52.3324	109.59
96.5	-19.8855	-13.5545	-8.42709	-7.50008	-4.78997	-10.8366	-5.71113	-4.48987	0.471942	16.055	25.3543	56.2699	126.764
97	-19.4067	-14.1308	-8.86081	-6.04026	-4.21918	-10.1544	-5.72897	-5.17908	-1.65653	17.2481	28.6944	59.3681	134.138
97.5	-19.8319	-15.4565	-9.24069	-6.93088	-4.35843	-7.68742	-6.16457	-4.62869	0.0371016	21.5933	33.3748	66.2548	141.15
98	-20.4953	-15.3607	-8.38015	-7.54454	-4.98915	-9.27368	-6.78789	-4.25573	0.334576	19.3667	40.3966	75.8729	153.336
98.5	-20.2642	-14.6871	-8.21205	-8.35403	-5.52321	-8.8759	-6.56862	-4.18667	-0.377154	17.4788	46.5896	84.3343	163.915
99	-18.6423	-14.6229	-8.07479	-6.64916	-4.23754	-9.31599	-6.07327	-1.66775	3.11002	20.2623	53.1913	92.6192	177.22
99.5	-19.3487	-14.1249	-7.51684	-6.0298	-4.42728	-9.90888	-4.80624	0.788922	5.3365	23.7035	58.6927	100.458	190.139
100	-19.9516	-14.8786	-8.69803	-5.8721	-3.00541	-9.90488	-4.65258	-0.830769	7.13607	29.9449	63.0216	107.408	203.867
100.5	-19.1566	-14.5415	-8.46315	-6.76066	-2.96869	-8.01275	-2.98604	0.0758549	9.87085	32.5896	69.014	118.275	216.223
101	-19.633	-14.8943	-8.88386	-6.58359	-3.48907	-9.03666	-4.29503	1.00976	10.9042	34.4893	77.7518	133.316	239.325
101.5	-18.7622	-14.4178	-8.90141	-7.40875	-5.22374	-9.39594	-3.25353	1.44969	12.0279	38.4259	90.5131	154.118	263.034
102	-20.6727	-13.6741	-8.37968	-6.56521	-5.40352	-10.2904	-2.80282	-0.236396	13.4835	43.1884	103.003	165.584	288.875
102.5	-18.892	-13.6953	-8.41916	-6.13668	-5.27498	-8.61236	-3.63183	1.35943	12.7148	47.6309	107.552	182.348	308.562
103	-18.3314	-14.407	-7.87224	-6.37966	-4.92815	-6.60136	-2.36263	2.88185	16.0813	52.0424	114.312	204.203	332.836
103.5	-20.4786	-14.7392	-8.47155	-5.87193	-5.41789	-8.07158	-3.62474	4.51853	19.136	51.7472	127.427	221.043	368.272
104	-19.8459	-14.3721	-8.17512	-5.82867	-4.99979	-7.30967	-2.36109	4.50711	20.7708	55.668	132.917	237.263	400.387
104.5	-19.9907	-13.2204	-9.69244	-6.43963	-4.0695	-6.67181	-3.39894	5.17116	21.1894	58.7273	142.827	258.108	427.713
105	-19.8967	-13.7725	-8.68072	-6.24924	-4.81206	-6.48453	-1.28978	6.00133	24.4353	62.5674	154.847	274.009	457.306
105.5	-18.3092	-13.2798	-7.3746	-6.39316	-4.47444	-7.15676	-1.84045	5.95779	25.7947	66.5643	162.072	290.35	490.88
106	-17.6383	-13.7684	-7.77548	-7.49714	-5.70259	-7.18183	-0.841091	7.0259	27.5828	71.2602	172.812	310.672	530.689
106.5	-18.2374	-13.1703	-9.79123	-5.77476	-7.09167	-8.19285	-0.245752	5.36567	32.6438	74.0374	183.213	336.197	574.34
107	-18.6775	-12.76	-7.4342	-6.17598	-6.18356	-8.26142	0.648847	4.13331	38.0825	76.9101	188.807	363.913	611.066
107.5	-18.1675	-12.7132	-7.39302	-7.1527	-5.90067	-7.60102	0.616524	2.95729	41.5836	83.9142	193.636	385.329	647.737
108	-20.4684	-12.5411	-8.36201	-6.71937	-6.29836	-8.01786	-0.0185276	4.06126	43.2803	94.5168	200.48	405.179	683.087
108.5	-19.3303	-12.9619	-8.65568	-6.93864	-7.41393	-6.64152	1.65418	4.60825	44.7543	99.0118	209.685	426.745	710.221
109	-18.8877	-12.9556	-9.53158	-7.60324	-8.86837	-7.53775	2.09138	4.20972	44.0207	101.422	231.745	449.121	740.642
109.5	-19.0124	-12.6065	-8.88727	-7.88872	-7.6272	-6.45681	1.17369	6.15981	47.4639	105.897	249.347	481.028	771.239
110	-18.4035	-12.9956	-10.1622	-5.94925	-6.77015	-6.34436	2.63343	7.95586	55.1517	112.852	261.691	514.912	812.515
110.5	-17.8288	-14.429	-10.0618	-7.00258	-6.48547	-5.59877	2.76549	9.40368	59.6946	121.891	275.143	547.492	854.326
111	-18.4979	-13.1873	-8.41923	-7.01669	-7.0862	-5.81362	1.29165	10.1045	65.758	127.769	293.659	584.053	895.827
111.5	-18.3486	-13.0859	-9.3131	-7.40694	-6.7317	-5.25663	1.67245	12.211	73.1741	133.842	319.318	604.029	941.736
112	-19.7919	-13.8014	-8.57455	-7.94695	-6.81705	-5.23248	3.1553	11.0906	74.761	142.32	340	629.738	991.426
112.5	-19.6997	-14.7748	-9.54789	-9.20052	-5.94701	-5.97611	3.29296	14.7792	72.5033	155.201	357.93	662.905	1040.85
113	-19.7315	-14.7216	-9.39209	-7.71035	-5.73517	-4.71765	1.60088	15.2446	71.097	165.549	379.397	686.537	1086.65
113.5	-20.1909	-14.1829	-9.12269	-7.01923	-6.42589	-6.25525	3.28501	16.678	75.1753	171.005	403.075	698.539	1135.19
114	-19.3588	-15.2013	-8.88442	-7.68071	-7.07884	-7.7706	3.65123	20.3213	79.2205	179.024	426.941	719.554	1182.15
114.5	-19.0511	-15.4506	-9.38752	-8.75971	-6.35481	-8.03513	1.89444	20.4234	84.8179	192.509	440.296	754.164	1222.35
115	-18.6527	-17.0081	-10.1061	-8.08154	-5.13776	-8.01142	3.15751	22.1635	87.9134	202.341	449.734	798.307	1265.58
115.5	-19.5419	-16.1051	-9.19263	-7.99034	-5.5307	-5.9654	6.10216	24.2281	93.4881	213.89	466.203	833.882	1311.88
116	-20.5662	-15.3287	-8.63749	-8.50446	-4.55194	-5.1995	7.48659	27.345	98.3549	223.942	493.515	852.923	1370.57
116.5	-20.1685	-14.7417	-8.39061	-9.25356	-4.48494	-5.59679	8.06754	27.7855	101.645	230.55	515.726	887.648	1425.26
117	-20.4444	-15.1584	-8.53153	-8.53223	-4.14265	-3.39675	8.75858	28.5838	104.362	241.409	536.325	923.181	1472.14
117.5	-21.1628	-15.4132	-8.51782	-7.5737	-3.87238	-2.92736	8.54334	31.3529	109.511	248.116	559.673	962.799	1529.48
118	-20.4966	-13.9739	-7.26406	-8.92214	-3.72604	-2.8107	7.79165	35.1942	117.777	257.258	578.027	1003.97	1602.6
118.5	-20.054	-15.1437	-8.64541	-7.86059	-5.19963	-3.17464	10.4288	36.6526	123.637	270.816	587.668	1039.65	1662.02
119	-20.0428	-15.8794	-9.63075	-6.68598	-5.29081	-2.41991	8.63608	37.7927	133.35	288.257	607.318	1090.68	1700.77
119.5	-19.6211	-14.0353	-8.42165	-7.87993	-5.02958	-2.60452	10.483	37.9482	143.66	308.752	632.579	1132.8	1736.87
120	-20.7451	-14.6376	-7.54471	-7.76276	-3.79161	-3.5752	9.0734	40.1548	146.225	321.75	647.552	1162.13	1777.88
120.5	-19.7379	-14.0213	-8.90418	-8.25221	-4.26667	-3.5161	7.88295	42.2488	144.299	339.627	667.647	1202.3	1830.56
121	-17.5725	-13.7639	-8.68307	-6.92274	-5.35822	-2.59112	6.99753	47.1607	145.924	348.594	689.831	1243.81	1877.12
121.5	-18.8366	-14.1235	-7.70905	-7.07145	-6.14294	-3.3141	8.64312	50.2517	148.58	360.959	710.537	1274.26	1920.86
122	-19.6518	-15.1116	-7.15543	-7.07992	-5.18911	-2.10645	13.9155	49.8959	153.558	375.945	739.497	1309.81	1976.25
122.5	-18.0536	-13.5741	-6.59846	-8.67383	-4.09714	-2.17121	16.9623	52.2041	160.174	388.764	765.766	1346.42	2031.54
123	-17.1289	-13.629	-7.72189	-9.1347	-5.98506	-1.02436	19.4356	52.7097	167.329	408.812	788.65	1386.38	2090.16
123.5	-19.2509	-11.5573	-8.6036	-8.39067	-4.91364	-0.792974	20.0474	52.2935	178.006	422.199	817.903	1417.58	2153.24
124	-19.7039	-12.8882	-8.38366	-8.20808	-5.26413	-0.864547	19.9165	56.2824	187.15	435.645	849.566	1458.84	2198.85
124.5	-19.2999	-13.9393	-9.42293	-9.23663	-5.2242	-1.64651	18.9674	63.6334	196.497	454.016	872.512	1506.65	2245.87
125	-19.3479	-13.7982	-7.51786	-8.00104	-5.23831	-2.06882	18.6742	66.6207	207.286	471.408	892.441	1565.08	2298.76
125.5	-19.8788	-14.0353	-9.06209	-9.47152	-5.19298	-1.7547	20.3122	65.9224	212.593	485.011	914.682	1614.25	2343.47
126	-18.3231	-13.9235	-8.02809	-9.74089	-5.47504	-0.713877	21.5157	69.8023	220.936	502.746	940.864	1658.15	2392.07
126.5	-17.4824	-13.9045	-8.35613	-9.48061	-4.3355	-0.113314	20.5281	76.8497	230.757	518.708	964.748	1705.79	2432.98
127	-18.4881	-15.5271	-10.033	-9.18546	-3.29953	0.907556	21.203	81.4434	242.392	536.467	1001.01	1741.07	2485.66
127.5	-17.6578	-15.6158	-8.63567	-7.67185	-3.71458	0.734464	22.5213	85.0642	251.626	553.039	1033.08	1767.77	2526.56
128	-17.9487	-14.7959	-10.1096	-7.92929	-4.8461	0.403389	24.0779	92.8749	260.811	568.937	1056.27	1803.33	2562.9
128.5	-18.6628	-14.3688	-10.2097	-8.85914	-4.46572	1.24971	25.9595	101.392	268.985	590.799	1083.86	1820.37	2613.44
129	-18.7639	-15.7137	-9.32769	-7.90658	-2.4916	1.81713	27.2154	105.413	275.375	608.221	1109.58	1836.77	2669
129.5	-17.9294	-16.5315	-9.67323	-6.87745	-1.96399	1.99965	28.7802	104.871	283.712	629.383	1131.61	1869.21	2734.6
130	-19.4598	-15.592	-10.5753	-8.25486	-4.20939	0.93769	29.3493	106.859	296.814	648.963	1157.66	1906.01	2782.98
130.5	-18.9305	-15.1787	-9.15435	-7.02266	-4.12504	2.20846	29.1288	107.489	305.236	667.977	1192.34	1940.77	2815.81
131	-19.5164	-15.6136	-9.38621	-7.74816	-4.5923	1.26806	33.1875	106.293	320.212	683.362	1226.27	1968.2	2856.09
131.5	-18.6486	-15.1991	-11.3144	-8.33505	-5.09061	3.13684	33.6566	111.519	339.229	695.697	1263.96	2008.72	2905.23
132	-18.4405	-16.5347	-10.2901	-7.87698	-3.53167	2.93371	39.1801	116.955	348.353	704.58	1291.58	2049.71	2950.78
132.5	-19.1865	-16.1598	-9.99363	-6.19357	-2.71229	1.97153	39.7346	117.887	354.258	721.947	1323.24	2082.41	3001.97
133	-19.0047	-15.8129	-9.71809	-7.71477	-1.03626	2.05197	39.8467	118.228	362.747	734.564	1353.14	2117.22	3055.33
133.5	-18.6257	-15.5247	-9.49287	-7.69304	-1.68962	2.3825	43.3436	117.682	374.294	746.65	1386.96	2159.55	3091.7
134	-19.9823	-14.6898	-9.81386	-6.93362	-3.12474	2.70811	45.3816	120.474	386.105	765.629	1415.06	2204.75	3125.85
134.5	-18.6808	-15.8777	-10.6086	-6.1905	-2.1784	2.64875	45.6797	124.976	397.759	785.804	1439.61	2241.56	3160.42
135	-19.5147	-15.0815	-9.99871	-6.76368	-2.4437	2.90527	45.5894	129.678	406.404	800.486	1470	2282.71	3196.86
135.5	-19.8423	-16.2337	-9.01568	-6.58971	-1.61812	4.59175	50.3267	135.73	421.315	823.086	1510.13	2321.22	3250.96
136	-20.2637	-14.8565	-8.21242	-6.6509	-2.24146	6.04385	53.5802	145.657	440.852	847.913	1547.04	2353.92	3295.22
136.5	-18.5237	-15.2736	-8.83104	-6.52227	-2.00698	7.07136	55.3954	156.182	444.576	872.014	1586.38	2390.88	3333.99
137	-18.673	-13.6121	-9.94608	-7.00625	-3.22419	8.88318	56.6502	161.836	441.236	889.812	1620.55	2439.55	3372.34
137.5	-17.8304	-12.3549	-9.03401	-6.48294	-3.96914	9.36282	56.2119	158.906	453.472	902.361	1643.48	2481.27	3403.14
138	-16.632	-15.2183	-7.76977	-6.26265	-1.95892	7.54595	55.9769	161.842	466.786	926.765	1667.07	2518.6	3447.11
138.5	-18.128	-16.5664	-9.20016	-7.07418	-1.72763	6.98182	56.9437	166.084	480.297	953.527	1690.67	2547.38	3485.75
139	-18.416	-14.8046	-9.14974	-6.9929	-2.46085	10.3188	62.49	170.473	493.5	971.305	1720.1	2576.32	3524.93
139.5	-19.2665	-15.0522	-9.28444	-7.86145	-2.91927	10.7523	66.4821	179.73	502.599	994.775	1749.28	2612.57	3557.13
140	-16.1784	-14.6877	-8.68615	-7.04434	-2.14928	9.88909	67.284	181.752	510.243	1006.79	1790	2656.61	3589.23
140.5	-16.5635	-12.8491	-8.66763	-8.39319	-0.74836	8.50575	68.2474	183.951	523.122	1016.83	1827.98	2697.71	3629.72
141	-17.9751	-13.2835	-9.5526	-6.58653	-1.42037	8.03612	69.4326	192.89	537.458	1028	1853	2733.23	3665.76
141.5	-18.9711	-13.829	-9.73754	-5.81661	-1.56898	9.20483	71.1765	199.861	550.755	1044.89	1877.4	2768.06	3698.06
142	-17.8023	-13.9279	-8.74511	-6.71411	-2.20206	8.13215	71.0017	203.47	562.956	1065.95	1895.44	2804.87	3731.97
142.5	-18.7881	-12.6061	-9.5396	-7.40619	-1.82313	7.86191	74.2823	208.73	574.936	1090.42	1915.56	2840.94	3748.09
143	-18.756	-14.6888	-8.30101	-7.34361	0.402386	10.6517	77.3647	214.278	586.421	1110.65	1947.77	2879.12	3768.87
143.5	-17.6832	-14.7528	-7.85934	-7.93368	-0.366812	11.0332	79.9474	219.204	602.524	1130.2	1976.53	2912.23	3808.88
144	-17.03	-13.6579	-10.0141	-6.27695	-1.0569	9.84517	83.6296	225.519	614.533	1149.45	2004.57	2943.47	3836.4
144.5	-17.7006	-14.9593	-9.37043	-5.44441	0.0525618	9.50128	85.2722	232.43	628.294	1166.69	2030.56	2971.89	3866.03
145	-16.9651	-14.6889	-8.26122	-6.7707	-0.73334	10.8258	84.3425	239.011	640.211	1181.49	2050.34	3010.16	3914.36
145.5	-17.3849	-14.3401	-8.89128	-6.51155	-1.13526	10.6041	84.6352	245.985	652.753	1205.8	2079.38	3047.51	3944.08
146	-18.9121	-15.1067	-10.0001	-5.74386	-0.189461	10.5791	84.806	257.276	665.604	1230.77	2105.45	3079.71	3968.38
146.5	-18.6254	-14.61	-9.13111	-6.48335	-0.158728	10.734	84.9835	266.559	674.489	1250.45	2138.74	3105.63	3996.75
147	-17.338	-13.9999	-9.93491	-7.35652	-1.72035	13.2474	84.491	271.353	688.418	1261.36	2184.54	3123.93	4026.52
147.5	-20.0839	-15.1626	-9.98205	-7.3966	-1.19578	13.6209	87.7977	277.071	715.558	1279.03	2217.37	3139.22	4052.58
148	-19.3779	-16.7827	-8.87287	-7.65292	0.197055	13.4704	90.4366	283.133	729.267	1311.59	2244.45	3179.52	4080.6
148.5	-19.2211	-15.3632	-9.16607	-8.88872	-0.315482	13.7839	90.8145	287.798	730.9	1333.98	2274.05	3216.04	4112.11
149	-19.541	-15.0287	-9.04245	-8.56525	-1.43094	13.506	93.6363	291.445	745.563	1353.69	2303	3238.51	4147.99
149.5	-19.5966	-14.6807	-9.51193	-7.70164	-0.338268	14.3306	95.9758	294.665	761.031	1381.32	2333.59	3271.49	4178.62
150	-18.1376	-14.8403	-10.5359	-6.66771	0.760382	14.0499	97.9114	303.285	769.574	1405.35	2348.76	3301.75	4203.56
150.5	-18.1178	-14.662	-8.7556	-7.31555	1.81058	16.187	98.1173	307.558	776.134	1428.18	2367.69	3324.07	4224.27
151	-19.0617	-13.3608	-8.08112	-5.62253	1.33023	17.0867	97.781	309.528	789.804	1450.63	2390.25	3346.86	4252.61
151.5	-19.0673	-13.4225	-8.26389	-7.32964	-0.421088	18.0477	99.1506	312.023	810.569	1469.73	2419.76	3368.36	4278.43
152	-18.0941	-14.1667	-9.09055	-6.29907	0.848614	19.676	102.912	315.708	823.233	1482.29	2444.33	3397.14	4297.91
152.5	-18.3031	-14.3803	-8.03287	-5.30477	2.43922	19.9786	104.467	319.179	833.361	1497.01	2463.59	3442.15	4327.86
153	-18.6816	-15.668	-7.83651	-4.51473	1.245	18.5525	105.736	326.942	847.852	1510.29	2479.83	3483.25	4354.31
153.5	-18.682	-14.3409	-8.13997	-6.30008	1.49437	20.8689	108.24	331.196	851.084	1529.58	2500.34	3502.03	4390.67
154	-18.3114	-14.5765	-8.60624	-7.77572	1.40612	21.4808	109.114	337.033	857.271	1548.73	2523.88	3519.79	4412.32
154.5	-19.028	-14.3406	-9.83894	-6.15255	0.703858	20.0898	113.167	347.504	866.866	1568.98	2543.1	3543.33	4426.07
155	-19.7474	-15.5988	-7.93372	-7.16167	0.890793	20.8471	119.561	357.009	879.87	1598.46	2570.11	3564.42	4453.13
155.5	-19.1725	-15.2075	-6.83967	-6.76742	-0.52417	22.2102	119.968	364.689	888.813	1623.27	2597.84	3584.47	4487.25
156	-17.3127	-14.9938	-8.11686	-5.66842	0.383128	22.6046	120.866	375.929	893.272	1646.91	2635.92	3604.65	4518.8
156.5	-19.0987	-14.0293	-9.61787	-6.17659	-0.563766	24.5202	121.41	386.465	900.231	1670.59	2674.77	3617.69	4545.98
157	-18.6853	-13.598	-9.14266	-5.92882	-0.0951686	26.9973	122.281	394.255	907.363	1696.36	2698.23	3636.6	4566.72
157.5	-20.4656	-14.5269	-7.6773	-5.8098	0.345774	26.8732	123.065	403.964	914.679	1718.65	2724.4	3665.38	4589.82
158	-19.9415	-13.5469	-8.56764	-5.93261	0.0401593	25.7917	125.696	405.83	924.44	1736.03	2754.81	3682.51	4605.76
158.5	-19.2871	-11.9418	-8.83714	-6.49097	0.467552	23.5871	126.962	407.197	936.796	1755.34	2769.89	3693.7	4618.03
159	-18.9765	-12.4097	-9.57081	-6.8578	0.102829	24.0411	130.434	414.792	952.087	1776.03	2777.31	3702.03	4642.49
159.5	-18.1779	-13.5141	-9.01456	-5.75484	-0.433618	22.9176	134.37	423.472	972.082	1793.04	2786.67	3740.24	4664.91
160	-19.0939	-13.8951	-7.69326	-4.79628	-0.804252	25.2133	138.271	427.951	990.778	1805.05	2808.24	3770.83	4680.77
160.5	-18.9096	-14.33	-8.86333	-5.90678	-0.0359275	26.5625	140.094	432.461	1007.79	1820.51	2826.43	3784.16	4708.4
161	-19.1906	-14.5893	-8.73367	-5.75703	-0.489013	28.0922	145.698	442.428	1021.05	1837.51	2847.84	3809.82	4754.9
161.5	-17.8166	-15.1737	-9.86539	-5.28987	0.0677283	26.5119	148.961	450.263	1039.29	1854.14	2868.83	3836.7	4785.33
162	-19.1667	-14.9527	-9.22965	-6.12305	0.873726	25.8419	151.464	455.609	1054.36	1870.52	2891.89	3856.69	4801.82
162.5	-19.2742	-15.5618	-8.8735	-8.41688	1.46945	26.6414	152.916	461.61	1064.95	1886.55	2911.85	3871.93	4833.27
163	-19.1949	-15.3642	-8.54018	-6.3861	2.01911	26.0069	154.796	471.699	1077.85	1904.55	2937.53	3877.72	4856.79
163.5	-18.4018	-16.098	-8.77688	-4.68622	1.07105	27.218	153.415	485.482	1090.18	1922.57	2952.39	3899.97	4879.76
164	-18.5549	-14.6005	-9.42529	-4.50455	-0.777191	24.1792	155.117	495.21	1108.65	1942.78	2960.14	3909.48	4908.83
164.5	-19.2738	-13.8222	-9.41516	-6.37785	-0.35947	24.1702	159.435	497.834	1124.69	1966.46	2975.53	3919.93	4938.84
165	-18.91	-14.4074	-9.95128	-5.42589	-0.23641	26.3862	162.712	509.535	1130.32	1979.53	2990.1	3938.86	4953.89
165.5	-20.7919	-14.8686	-7.72958	-5.44617	2.1978	26.6383	163.682	520.008	1130.11	1984.59	3010.55	3953.29	4966.5
166	-20.5853	-15.0387	-9.17108	-6.30496	1.88322	26.5212	168.948	528.938	1139.57	2000.25	3034.72	3978.43	4980.31
166.5	-20.0703	-13.9623	-10.4768	-6.61485	1.88135	26.0722	173.289	537.378	1158.77	2020.06	3041.18	4001.67	4993.97
167	-20.2678	-13.648	-10.0105	-5.51811	2.1937	26.8438	174.195	546.474	1175.44	2037.02	3048.43	4013.12	5018.9
167.5	-19.8351	-14.5845	-10.2029	-6.15261	2.00187	29.8935	174.467	551.843	1186.9	2049.6	3066.17	4022.14	5041.15
168	-21.2854	-15.2651	-9.67869	-6.90102	2.97415	29.9804	175.865	555.822	1206.21	2059.46	3083.93	4032.83	5055.69
168.5	-20.1808	-14.1659	-8.33738	-5.95187	4.4005	31.1612	180.31	566.163	1221.02	2085.62	3123.03	4049.94	5068.98
169	-19.9224	-13.9053	-8.38622	-5.32344	4.25771	30.8565	183.52	575.98	1235.62	2107.51	3157.6	4082.76	5087.66
169.5	-20.3334	-14.3908	-9.08518	-6.01908	3.93999	31.4599	183.872	581.097	1254.88	2130.32	3172.01	4105.04	5093.76
170	-20.9738	-13.9407	-8.38561	-6.88969	2.19856	32.8657	184.012	588	1272.7	2150.92	3185.36	4112.41	5113.35
170.5	-19.9916	-14.2228	-8.43027	-5.24689	2.00618	34.8165	187.178	590.95	1287.43	2176.89	3205.34	4118.49	5125.22
171	-18.701	-14.1032	-8.4693	-5.3612	4.35302	35.3199	193.939	595.444	1294.04	2198.05	3218.31	4115.9	5129.46
171.5	-19.3816	-13.4916	-8.05573	-5.32415	4.85444	33.7199	197.198	605.24	1306.81	2216.7	3228.64	4134.84	5143.59
172	-19.6626	-14.5319	-8.9832	-6.36256	2.98311	35.155	195.962	614.103	1315.46	2235.14	3241.75	4170.33	5160.94
172.5	-19.1122	-14.0797	-7.6594	-5.83154	3.36972	36.084	198.544	627.188	1331.48	2254.1	3260.2	4203.88	5170.61
173	-18.127	-14.6119	-8.71758	-6.76833	4.5381	37.9486	202.57	630.303	1351.97	2257.16	3277.63	4221.1	5186.25
173.5	-18.7347	-14.8765	-8.6894	-7.58584	3.93445	38.6113	205.263	635.826	1364.6	2259.23	3289.77	4225.07	5218.96
174	-19.2125	-13.8086	-8.48006	-9.32526	2.79453	40.3922	208.804	644.397	1368.4	2270.39	3320.07	4237.66	5247.13
174.5	-19.1498	-13.8231	-8.59987	-7.67721	3.61384	42.6615	217.861	647.487	1381.56	2288.01	3342.53	4244.33	5259.99
175	-19.0409	-15.4359	-9.23654	-7.32871	3.81277	41.8015	222.391	652.539	1397.53	2299.72	3357.06	4252.41	5270.2
175.5	-16.9842	-14.3957	-9.40843	-7.14049	3.25561	40.8929	226.052	655.61	1402.3	2319.35	3381.01	4279.91	5289.93
176	-18.2821	-13.7104	-8.95501	-7.65501	4.61542	42.3399	230.329	663.067	1408.83	2345.9	3405.63	4302.1	5309.88
176.5	-18.0572	-12.7164	-8.62077	-8.6163	5.08221	44.5721	235.026	675.205	1427.08	2362.24	3424.97	4315.85	5327.53
177	-19.0812	-14.4802	-8.83412	-8.11336	5.67324	46.4713	235.957	687.347	1452.97	2373.68	3433.91	4325.67	5344.74
177.5	-19.488	-14.4581	-8.90394	-6.16736	6.4858	46.6706	237.04	695.147	1469.42	2379.56	3439.63	4333.82	5359.73
178	-19.5218	-13.4384	-8.88993	-7.08834	6.10529	47.1721	243.877	692.363	1476.96	2386.35	3464.76	4354.91	5382.25
178.5	-18.099	-14.6501	-9.69745	-7.99512	7.36138	47.3493	249.013	695.636	1485.61	2398.98	3480.89	4367.81	5404.41
179	-18.5357	-14.3811	-9.62534	-9.30036	5.52486	50.4321	252.212	706.91	1495.02	2411.99	3490.63	4384.89	5418.45
179.5	-20.2222	-13.1702	-10.0941	-8.17156	4.51504	51.2996	252.229	721.384	1507.62	2430.39	3496.02	4398.28	5422.17
180	-19.3566	-13.1368	-10.3851	-7.41922	5.0628	52.6859	252.799	732.607	1518.22	2452.13	3511.56	4402.73	5432.16
180.5	-18.4418	-15.2082	-10.086	-8.32708	6.26322	52.3998	256.074	738.969	1523.68	2467.74	3527.98	4421.21	5441.28
181	-18.4697	-15.6592	-10.0179	-7.443	5.37513	53.9646	258.471	743.683	1538.92	2473.04	3539.36	4444.42	5457.4
181.5	-19.083	-15.3643	-9.64943	-8.04261	6.62184	54.497	256.591	753.923	1550.66	2494.62	3549.34	4459.15	5478.85
182	-20.443	-16.209	-9.55653	-9.18894	6.48684	54.4851	256.869	768.181	1558.83	2513.12	3552.96	4478.38	5489.12
182.5	-20.1869	-14.817	-9.55282	-8.72895	5.49475	55.7427	258.671	776.9	1575.83	2520.32	3556.58	4482.61	5487.7
183	-18.459	-14.7132	-10.3374	-8.21429	5.7893	56.6936	259.913	787.652	1587.69	2520.36	3559.46	4492.78	5491.37
183.5	-18.5381	-15.5126	-9.72481	-8.42283	4.64501	57.1528	258.912	798.45	1601.98	2538.75	3565.9	4503.88	5499.25
184	-19.5686	-15.823	-9.35021	-8.19762	4.95231	60.5525	261.808	804.691	1612.91	2561.83	3571.43	4525.75	5501.34
184.5	-17.7108	-15.4205	-9.73756	-8.29048	6.68309	62.9215	267.438	808.663	1627.99	2586.45	3576.36	4539.95	5504.66
185	-16.7152	-14.5453	-8.67031	-7.65581	7.28019	62.8764	267.625	820.05	1639.58	2607.47	3586.76	4549.52	5503.76
185.5	-18.1653	-15.0609	-8.13498	-7.19945	6.54262	62.1073	269.914	831.02	1652.89	2627.58	3595.28	4553.56	5510.99
186	-19.1887	-16.0423	-8.04133	-7.75582	4.84701	63.8262	277.763	829.952	1660.8	2630.53	3618.33	4565.56	5534.89
186.5	-19.0307	-15.1171	-9.10024	-6.90414	3.958	63.1024	286.98	831.218	1666.66	2646.43	3648.89	4575.49	5556.8
187	-16.2707	-13.9888	-8.88731	-5.67741	4.20241	65.606	296.711	840.438	1684.39	2653.16	3665.08	4588.4	5563.23
187.5	-17.3751	-14.1257	-9.33281	-6.34599	4.16363	67.9478	297.691	842.84	1691.53	2662.25	3679.3	4600.2	5579.37
188	-19.4709	-14.0891	-9.68117	-7.6408	4.26756	69.1499	300.993	853.518	1697.8	2674.06	3699.25	4609.13	5601.24
188.5	-20.6188	-14.6799	-7.37685	-7.63843	5.57251	69.1628	309.512	866.91	1705.56	2682.95	3706.81	4606.23	5605.05
189	-20.314	-13.439	-7.23983	-7.27909	7.69053	66.5654	314.393	876.153	1711.65	2692.23	3723.64	4618.12	5605.94
189.5	-19.4996	-12.4821	-8.64517	-7.4896	6.24738	67.5991	314.761	881.833	1728.72	2698.78	3745.37	4636.74	5603.8
190	-19.3765	-13.2568	-7.70937	-7.20145	4.15713	68.1914	315.808	885.52	1745.33	2710.64	3758.81	4654.49	5606.98
190.5	-18.335	-12.7978	-7.90079	-6.19837	4.83573	68.3244	318.871	893.13	1758.55	2723.97	3765.88	4666.22	5624.7
191	-18.4076	-13.4067	-7.68251	-8.29039	5.26801	70.602	320.745	898.091	1773.59	2736.63	3766.54	4685.57	5655.73
191.5	-17.5378	-13.8261	-8.22068	-7.46176	3.36431	72.4608	320.189	907.178	1781.12	2739.09	3780.06	4697.32	5675.37
192	-16.5622	-13.7457	-9.65558	-7.48144	4.33379	73.5358	324.503	921.731	1780.55	2749.26	3800.2	4704.88	5690.28
192.5	-17.4172	-13.9556	-8.61129	-7.225	4.30598	75.8254	329.747	932.751	1792.99	2761.62	3815.39	4723.19	5695.94
193	-16.4136	-14.1786	-7.64636	-7.60424	4.92515	74.6247	333.084	940.314	1809.59	2777.08	3818.48	4746.61	5704.87
193.5	-15.8463	-14.1061	-7.82196	-8.0122	6.12328	75.0648	336.736	937.318	1817.56	2791.37	3817.91	4751.8	5714.53
194	-17.051	-13.1574	-9.48505	-7.26489	6.74078	76.1515	335.584	939.226	1816.08	2793.42	3816.06	4756.18	5723.43
194.5	-17.0478	-13.7488	-10.385	-7.93889	7.78124	77.2405	341.746	940.58	1817.61	2797.82	3828.2	4771.56	5717.61
195	-17.067	-13.9318	-8.28091	-7.20755	9.11894	77.4888	346.939	945.629	1822.44	2809.37	3833.23	4798.61	5718.11
195.5	-18.1223	-14.5614	-8.10579	-6.60738	10.2796	79.0913	348.567	958.602	1834.28	2820.7	3844.71	4822.97	5731.11
196	-17.652	-15.5833	-8.21686	-6.55186	7.88575	79.3687	353.906	964.157	1850.41	2835.33	3859.53	4836.16	5749.07
196.5	-17.2197	-15.0906	-8.42086	-7.35666	7.95913	77.5307	358.75	978.057	1869.12	2847.05	3861.35	4840.24	5761.18
197	-17.3871	-14.1824	-9.68158	-6.78488	7.96061	78.3756	360.043	992.63	1884.41	2853.56	3876.24	4844.65	5762.14
197.5	-17.8573	-16.0296	-10.2509	-6.89157	7.8531	79.0201	359.137	1010.16	1898.89	2872.14	3891.73	4854.22	5772.81
198	-17.0982	-16.1045	-9.12729	-7.38178	8.78228	76.5161	361.153	1012.09	1908.44	2897.95	3897.55	4859.56	5784.18
198.5	-17.6569	-15.0407	-9.69478	-7.46763	8.49754	74.9589	364.07	1016.07	1915.91	2921.2	3908.88	4856.81	5788.61
199	-18.9071	-13.7678	-9.66333	-5.86765	7.78945	77.4435	362.058	1023.84	1926.74	2931.01	3921.97	4854.93	5801.04
199.5	-18.7332	-14.9795	-9.57124	-6.71849	7.68056	80.5198	364.407	1028.43	1941.37	2934.33	3926.3	4865.01	5813.62
200	-17.5292	-15.2144	-6.61329	-5.42525	8.38061	83.8179	369.946	1029.36	1957.44	2945.44	3935.34	4873.4	5824.24
200.5	-18.0062	-14.2664	-8.89527	-5.87628	8.36598	84.8964	374.862	1034.27	1964.93	2955.64	3957.83	4877.44	5822.87
201	-18.1031	-14.0842	-8.36082	-7.15091	8.55695	82.4784	380.318	1039.38	1975.77	2966.99	3971.92	4885.1	5830.47
201.5	-17.9101	-14.4777	-9.66889	-6.59745	9.63596	79.5061	383.193	1045.13	1983.75	2977.02	3986.41	4887.15	5837.87
202	-17.3075	-14.1107	-9.95223	-5.43898	8.81008	76.9832	383.55	1051.86	1989.23	2981.53	3998.54	4885.84	5842.04
202.5	-16.8505	-12.6187	-7.97932	-5.27642	9.75159	78.1196	386.623	1060.38	1993.39	2988.12	4008.49	4894.13	5853.28
203	-17.5229	-13.4982	-8.46237	-4.50566	8.6511	78.8535	391.297	1075.87	2004.02	3007.54	4012.19	4909.78	5852.42
203.5	-18.6947	-13.5075	-10.5524	-5.31655	7.83031	83.1352	389.309	1091.01	2006.22	3022.87	4007.47	4918.97	5867.35
204	-18.7103	-14.6997	-10.6265	-5.98237	7.49056	86.2335	386.752	1098.25	2010.53	3024.64	3998.22	4930.47	5870.92
204.5	-16.6817	-14.9077	-8.79323	-5.78103	9.77794	87.7491	390.979	1107.36	2014.63	3027.96	4000.48	4944.71	5869.04
205	-17.3079	-14.9518	-8.29897	-7.6663	9.80008	89.2068	395.852	1117.44	2021.91	3031.15	4012.42	4959.92	5871.37
205.5	-16.8205	-13.9495	-8.04335	-6.82887	8.33376	93.9328	395.502	1120.93	2033.68	3038.51	4014.99	4966.23	5874.39
206	-18.4693	-11.8145	-7.60589	-6.46829	8.06183	95.5444	395.751	1128.6	2045.81	3046.44	4020.82	4973.21	5879.08
206.5	-18.5406	-11.3071	-7.19622	-6.82675	7.72755	98.0329	400.048	1129.96	2045.96	3048.74	4024.01	4980.64	5881.77
207	-18.5423	-12.5981	-7.23369	-6.7329	7.60132	99.7194	398.609	1130.15	2057.35	3052.65	4036	4979.55	5881.81
207.5	-16.7601	-14.599	-9.21044	-7.30273	7.80429	100.009	406.594	1136.38	2070.69	3061.31	4042.64	4984.82	5888.98
208	-16.0719	-13.8877	-9.68631	-6.59157	9.81485	100.173	416.662	1149.1	2079.92	3069.54	4038.23	4998.94	5894.13
208.5	-17.7351	-12.859	-9.38787	-8.18932	9.86983	104.115	418.231	1156.34	2082.08	3069.72	4038.36	5008.76	5905.29
209	-15.7095	-12.3373	-8.33665	-6.63316	9.20555	108.07	421.731	1150	2094.3	3082.4	4054.83	5005.82	5919.35
209.5	-17.059	-13.5896	-7.85099	-4.70717	9.98813	107.158	430.322	1151.16	2110.96	3100.25	4069.08	5012.29	5930.97
210	-17.0456	-13.4093	-9.40297	-7.76719	11.8289	103.912	437.217	1157.6	2120.43	3109.51	4076.52	5017.02	5929.09
210.5	-16.264	-13.8599	-9.77269	-7.70475	10.7675	101.418	443.014	1160.2	2129.83	3117.78	4087.86	5022.52	5928.02
211	-16.3718	-14.2571	-9.79788	-7.11262	10.7557	102.187	450.727	1167.84	2137.29	3127.51	4105.4	5022.27	5930.83
211.5	-16.1081	-15.0028	-9.76929	-8.80498	11.4478	103.664	451.056	1181.64	2142.45	3141.33	4118.11	5021.64	5940.71
212	-17.0519	-14.3726	-11.2876	-6.55299	10.9324	103.126	447.784	1196.68	2150.64	3148.45	4133.4	5042.91	5949.38
212.5	-17.9608	-14.5378	-9.50119	-6.53684	9.99739	102.672	440.101	1201.89	2159.08	3149.21	4155.98	5062.35	5960.21
213	-17.0494	-14.5671	-8.83114	-6.97977	10.1897	101.636	441.626	1202.07	2161.11	3161.51	4171.82	5077	5966.28
213.5	-17.3137	-14.0579	-9.99858	-6.05083	11.5804	102.601	444.931	1203.2	2172.66	3170.98	4174.83	5084.03	5967.9
214	-16.9967	-14.7336	-9.57697	-6.96265	10.5147	104.962	446.475	1206.34	2180.33	3174.91	4176.89	5088.72	5966.27
214.5	-18.085	-13.9961	-8.96789	-6.53731	10.1419	104.262	450.461	1204.88	2178.94	3178.6	4182.76	5086.58	5982.25
215	-17.9345	-14.5432	-9.03841	-5.32949	10.8203	103.743	454.155	1208.31	2183.48	3190.86	4194.69	5087.15	6000.18
215.5	-17.2353	-14.3163	-10.1139	-5.68315	10.9335	105.205	456.703	1215.12	2196.24	3204.73	4214.3	5096.02	6013.35
216	-19.0044	-14.1843	-11.0801	-5.19615	9.99571	107.951	459.734	1224.51	2211.05	3217.91	4217.57	5096.01	6018.63
216.5	-19.3741	-13.4521	-10.1465	-6.11582	11.1695	110.56	465.028	1230.53	2222.22	3227.29	4214.12	5099.79	6029.98
217	-18.2341	-14.1564	-8.85762	-5.30052	10.5406	109.512	473.382	1234.62	2224.82	3230.36	4205.5	5105.22	6042.05
217.5	-17.7425	-15.6977	-8.62709	-6.04581	11.6775	111.082	478.727	1239.8	2237.91	3239.76	4200.78	5108.44	6046.5
218	-19.2114	-14.4995	-9.15883	-6.44263	11.9441	113.982	480.373	1244.52	2250.38	3245.02	4211.67	5116.18	6055.78
218.5	-18.9229	-14.2863	-8.94955	-4.65133	13.6516	116.373	480.595	1253.52	2250.33	3253.68	4228.3	5124.59	6064.6
219	-18.5543	-15.4053	-9.3604	-5.5147	14.2211	118.712	481.155	1260.21	2246.12	3265.1	4242.09	5134.9	6078.66
219.5	-19.0183	-15.9143	-9.05823	-6.25652	13.1405	116.404	487.265	1266.31	2247.23	3274.28	4251.9	5157.38	6101.42
220	-19.6451	-14.4772	-9.15583	-4.12373	12.4126	120.801	492.582	1272.87	2255.18	3272.55	4268.35	5175.86	6105.3
220.5	-18.0571	-14.7359	-7.7469	-5.80766	12.3325	122.111	499.922	1272.34	2262.36	3272.71	4279.01	5180.27	6103.71
221	-17.9881	-14.1452	-7.87648	-5.69337	12.0187	122.436	504.796	1282.45	2261.65	3264.22	4282.97	5192.31	6105.55
221.5	-19.5266	-13.1528	-7.15604	-5.45738	11.4551	122.965	506.431	1296.26	2258.95	3257.76	4288.45	5199.76	6110.73
222	-17.8721	-13.8058	-8.15591	-6.66341	10.6671	123.135	509.594	1300.96	2262.67	3266.21	4303.06	5208.43	6118.56
222.5	-18.6556	-15.7927	-9.22116	-5.96848	11.8194	122.639	514.578	1300.08	2271.13	3279.34	4308.61	5217.17	6122.69
223	-18.8354	-14.8341	-8.22701	-7.17481	13.5004	123.167	520.504	1294.82	2278.02	3293.46	4311.78	5211.83	6131.09
223.5	-17.919	-14.9879	-9.0465	-6.28291	13.3019	126.069	524.708	1301.68	2287.56	3306.19	4319.58	5198.21	6133.35
224	-16.8296	-14.6362	-9.61149	-6.09409	14.2289	128.512	532.957	1307.39	2294.58	3316.63	4322.86	5194.56	6133.06
224.5	-18.5169	-14.1182	-9.34379	-7.33171	15.1937	127.672	537.999	1314.79	2303.27	3324.15	4334.16	5207.56	6140.82
225	-18.0957	-15.5676	-8.15615	-5.86958	13.653	130.856	535.189	1326.71	2301.86	3329.73	4338.53	5222.05	6137.41
225.5	-17.1674	-14.5248	-7.88323	-6.99995	13.6647	127.926	533.782	1331.54	2312.65	3339.41	4339.11	5228.17	6139.94
226	-15.5915	-15.2318	-8.58964	-8.19059	15.402	128.553	535.298	1338.48	2324.45	3344.59	4348.68	5235.66	6141.59
226.5	-16.2199	-14.1394	-9.39461	-7.2211	13.4409	128.902	537.012	1346.02	2328.26	3352.99	4355.98	5244.73	6152.24
227	-18.3191	-14.0048	-9.09548	-7.65312	13.265	131.298	537.8	1350.93	2326.22	3365.26	4366.22	5241.98	6167.66
227.5	-17.9763	-14.606	-10.0214	-7.81018	13.7633	130.009	534.667	1354.06	2327.44	3382.95	4358.95	5241.69	6178.68
228	-17.0187	-15.1479	-8.70282	-5.40717	14.3294	135.816	535.67	1360.37	2331.65	3399.91	4351.83	5243.44	6180.33
228.5	-17.5945	-14.2191	-9.02259	-5.70737	15.7668	138.589	545.014	1371.98	2345.6	3393.7	4356.26	5245.61	6185.12
229	-18.0416	-15.6669	-8.80052	-6.08922	15.7814	137.327	558.972	1376.07	2356.39	3383.72	4369.86	5243.81	6192.44
229.5	-18.3771	-14.8085	-8.96884	-6.83464	16.0405	136.876	563.777	1375.41	2359.61	3383.72	4377.15	5248.87	6189.55
230	-17.7538	-14.9949	-9.2205	-6.60004	14.96	138.405	571.164	1371.33	2364.83	3392.15	4379.78	5258.26	6179.83
230.5	-17.6693	-14.9132	-9.87918	-5.95611	12.8925	140.402	576.333	1371.98	2371.76	3398.51	4377.74	5269.18	6179.37
231	-16.7432	-16.0969	-8.44863	-7.24892	11.1051	139.937	583.31	1370.71	2386.04	3404.15	4380.36	5279.91	6184.29
231.5	-17.1435	-15.6982	-8.90585	-6.25254	13.7687	141.985	582.985	1372.38	2390.83	3401.86	4383.82	5285.96	6192.2
232	-18.4543	-14.0952	-9.22828	-6.98235	13.6778	142.699	579.092	1383.42	2391.74	3409.57	4381.78	5297.09	6191.04
232.5	-18.5502	-15	-9.94504	-6.24917	12.7138	143.486	577.988	1388.86	2396.69	3411.88	4395.88	5299.08	6198.18
233	-19.0855	-16.4595	-8.14635	-5.48779	13.7879	142.244	581.201	1393.43	2403.97	3408.97	4402.28	5293.7	6209.32
233.5	-18.8509	-16.9114	-8.83161	-5.60147	15.7881	142.627	584.137	1399.02	2417.71	3412.71	4392.69	5289.44	6206.63
234	-18.7468	-14.352	-9.06523	-7.25366	17.3732	145.172	591.958	1404.38	2417.71	3417.56	4383.54	5285.07	6203.66
234.5	-19.741	-14.1431	-8.38746	-7.3079	19.7065	146.678	596.421	1411.75	2416.72	3422.75	4385.28	5293.7	6211.05
235	-17.1756	-15.223	-8.8653	-5.81349	18.7409	146.396	599.183	1412.21	2423.22	3421.62	4392.32	5306.95	6206.24
235.5	-19.4718	-15.2195	-6.12233	-6.08862	18.1539	147.003	602.102	1415.53	2427.54	3426.22	4407.18	5309.62	6197.13
236	-18.9132	-14.5586	-8.22599	-5.92268	19.1202	148.611	606.163	1420.03	2424.53	3430.41	4417.38	5309.44	6200.71
236.5	-17.5726	-14.8376	-8.30972	-5.70283	19.6397	147.53	606.347	1431.73	2434.83	3436.43	4418.88	5318.08	6206.62
237	-17.9958	-14.9633	-8.56421	-6.92541	19.7904	147.483	604.646	1444.54	2447.09	3449.82	4424.88	5332.59	6212.98
237.5	-17.6449	-14.66	-8.67836	-6.11469	20.1016	147.171	610.465	1456.83	2452.38	3459.01	4429.35	5345.35	6213.94
238	-18.0092	-14.3579	-7.98672	-5.69019	16.5773	146.771	615.459	1449.37	2452.8	3463.49	4432.85	5352.13	6213.75
238.5	-16.5139	-13.5202	-6.8804	-4.1142	16.2005	148.718	619.933	1444.59	2452.49	3473.7	4427.59	5361.31	6215.91
239	-16.7574	-13.7746	-8.4236	-4.55082	17.4811	149.005	627.271	1452.4	2461.28	3478.93	4420.95	5377.28	6213.11
239.5	-18.2334	-13.6524	-9.35149	-6.11665	17.741	148.545	630.068	1461.83	2474.26	3477.61	4433.45	5390.52	6211.29
240	-17.9382	-14.1347	-8.84896	-5.91509	16.8756	150.486	628.764	1471.36	2465.33	3477.06	4448.26	5388.8	6207.84
240.5	-17.7144	-12.6582	-9.77857	-7.22284	15.9133	152.479	634.288	1474.43	2457.28	3483.24	4444.15	5388.48	6217.55
241	-17.3277	-13.5406	-8.56974	-6.73279	16.0746	152.368	642.497	1474.34	2461.18	3487.3	4436.84	5390.46	6223.88
241.5	-17.4381	-14.0992	-8.33648	-7.1506	17.4956	153.613	646.392	1478.03	2470.31	3500.95	4430.74	5382.97	6234.44
242	-17.3591	-13.5458	-8.77535	-6.54991	16.6981	154.777	648.716	1482.53	2472.12	3502.21	4427.68	5385.92	6237.66
242.5	-17.2817	-14.4086	-8.08689	-7.03306	15.8377	153.596	649.794	1482.53	2465.32	3493.42	4431.59	5387.81	6229.73
243	-16.9822	-14.0083	-8.76488	-7.3049	17.0434	155.295	649.393	1479.57	2458.53	3495.89	4441.71	5383.84	6227.66
243.5	-15.4436	-14.626	-9.19289	-6.88545	17.1112	155.061	651.495	1483.17	2454.56	3512.99	4451.72	5388.68	6241.94
244	-16.8703	-14.2159	-8.30444	-7.04953	19.1559	160.308	649.327	1491.2	2460.33	3531.78	4468.96	5390.25	6244.82
244.5	-16.7786	-14.5256	-9.34151	-6.68026	17.8515	165.171	655.548	1490.51	2467.16	3542.17	4474.66	5399.94	6261.4
245	-16.9232	-15.2599	-9.31886	-6.29633	18.584	166.422	663.045	1495	2462.87	3552.7	4484.53	5416.65	6275.22
245.5	-16.39	-14.2447	-8.35073	-6.96773	20.2284	166.632	668.596	1498.2	2465.39	3561.99	4488.1	5426.35	6283.69
246	-17.9149	-15.2042	-10.0487	-6.59854	22.1334	165.353	675.437	1502.14	2475.08	3552.77	4485.3	5424.75	6292.41
246.5	-18.4915	-14.9932	-9.03886	-6.57336	22.6801	166.072	684.182	1508.54	2481.84	3542.43	4493.94	5425.28	6291.51
247	-18.7164	-14.6133	-9.17387	-5.80746	22.6154	167.805	686.266	1513.92	2486.48	3541.48	4495.72	5433.25	6286.3
247.5	-18.84	-15.673	-9.03589	-5.77708	22.7476	171.564	689.238	1514.85	2492.42	3546.59	4491.72	5448.24	6283.82
248	-18.7148	-14.8001	-9.23568	-7.95043	21.1919	176.503	690.968	1518.31	2498.75	3546	4500.39	5468.33	6297.11
248.5	-18.5908	-15.0518	-8.33898	-5.57727	21.0258	182.284	690.824	1532.03	2503.68	3543.51	4513.96	5471.03	6300.97
249	-17.3868	-15.0073	-8.52539	-5.88441	20.2595	182.182	692.087	1541.92	2505.37	3555.27	4523.64	5460.49	6298.85
249.5	-18.0522	-14.4839	-7.93027	-5.99012	21.2761	179.783	691.235	1544.39	2497.88	3563.14	4520.36	5452.35	6294.99
250	-18.4995	-13.8627	-7.93133	-5.35998	22.0698	180.589	690.282	1551.43	2488.03	3572.14	4528.94	5452.31	6304.37
250.5	-17.9896	-14.9359	-7.61122	-5.56751	21.1098	184.38	689.951	1559.23	2491.3	3581.14	4529.38	5446.45	6307.51
251	-18.3222	-15.4401	-8.96486	-4.16261	19.2413	182.356	688.917	1558.31	2500.31	3584.68	4530.64	5439.61	6309.39
251.5	-18.4864	-13.9678	-7.82403	-3.22887	18.8883	179.349	685.018	1560.98	2505.54	3590.94	4538.48	5433.05	6303.36
252	-17.9177	-13.7235	-8.73934	-5.04347	20.1523	184.523	684.338	1564.27	2511.39	3599.79	4541.2	5429.59	6300.56
252.5	-18.0071	-14.1525	-9.12735	-4.30332	20.6484	190.011	688.734	1563.77	2518.83	3612.4	4556.07	5438.15	6304.61
253	-18.1501	-14.5634	-10.0639	-3.1821	19.5195	188.862	694.682	1562.62	2531.34	3625.71	4565.15	5452.96	6309.47
253.5	-17.6573	-14.3477	-9.22849	-4.98894	20.0893	185.883	698.021	1569.61	2541.41	3630.89	4573.51	5459.91	6317.45
254	-17.9416	-14.7076	-7.91442	-3.93026	21.0849	188.838	706.03	1574.03	2543.13	3635.79	4576.24	5467.24	6313.86
254.5	-18.9708	-15.3499	-6.70841	-3.4917	22.2334	192.622	708.609	1582.75	2551.44	3631.42	4582.72	5482	6319.73
255	-18.783	-11.9161	-6.95627	-5.29782	23.6761	192.337	706.771	1587.72	2557.93	3626.09	4586.58	5486.31	6324.81
255.5	-19.4476	-13.1587	-6.87873	-5.55815	23.3718	191.278	707.217	1586.54	2556.14	3619.02	4581.29	5477.84	6338.93
256	-19.3395	-15.0054	-7.43426	-6.00972	22.8527	191.023	712.794	1587.29	2549.78	3621.75	4577.82	5475.9	6334.76
256.5	-18.8101	-14.2738	-8.70484	-6.02023	25.8386	192.973	719.486	1591.6	2557.69	3623.53	4588.94	5471.13	6324.66
257	-18.7724	-14.2429	-8.25739	-5.41597	25.8733	196.52	727.283	1592.04	2566.11	3624.33	4594.22	5461.67	6316.75
257.5	-18.4093	-14.4841	-8.21021	-6.37294	23.4907	196.16	736.129	1594.98	2568.05	3629.9	4594.47	5450.85	6317.18
258	-17.8339	-14.4508	-6.90613	-5.48854	24.9793	199.283	742.99	1608.45	2564.75	3635.98	4601.1	5441.5	6324.74
258.5	-18.454	-14.6197	-7.3219	-6.81294	24.7226	201.733	750.364	1612.91	2569.01	3637.1	4610.45	5440.1	6326.58
259	-19.3678	-15.0749	-7.95084	-6.51889	23.4665	201.608	757.181	1609.63	2574.71	3631.61	4619.27	5449.77	6330
259.5	-19.8933	-13.2845	-8.50565	-6.15218	22.0035	201.715	757.18	1612.21	2569.2	3621.26	4619.73	5461.61	6335.55
260	-17.8294	-13.83	-8.24129	-6.4387	19.9329	200.029	760.134	1620.57	2562.22	3615.55	4617.61	5468.63	6342.66
260.5	-18.6973	-15.2879	-7.62677	-6.15915	18.8248	198.15	765.008	1619.39	2566.43	3631.39	4610.28	5462.84	6347.42
261	-17.5011	-15.0426	-6.91443	-5.48197	18.4034	197.456	762.183	1625.6	2566.41	3652.72	4606.18	5455.83	6366.49
261.5	-17.5033	-15.4067	-6.87095	-6.17488	22.5576	202.566	757.858	1636.57	2579.23	3659.27	4611.68	5465.2	6365.96
262	-17.5507	-15.4932	-8.38245	-7.29757	22.5033	204.244	753.61	1644.46	2588.7	3659.29	4620.76	5477.54	6349.87
262.5	-18.3435	-14.9313	-8.74605	-6.04987	22.6132	205.961	746.825	1644.34	2587.11	3672.37	4628.43	5484.3	6339.42
263	-18.0699	-13.7843	-7.77461	-4.96948	22.2924	207.026	748.308	1641.56	2586.52	3683.65	4637.09	5486.08	6356.8
263.5	-19.2607	-14.854	-7.64096	-6.46338	20.4579	210.449	759.007	1640.75	2594.07	3696.82	4645.07	5495.41	6369.38
264	-19.6833	-15.131	-7.35314	-5.18402	19.2204	209.021	764.492	1640.82	2606.54	3699.08	4657.37	5496.82	6373.43
264.5	-18.9639	-14.3787	-7.7996	-4.05604	20.3036	212.477	767.888	1652.41	2617.78	3698.13	4666.26	5494.36	6382.97
265	-17.8812	-14.7305	-8.41627	-3.84255	21.5437	211.114	768.423	1659.44	2620.47	3695.43	4677.48	5494.67	6391.01
265.5	-18.7118	-15.5605	-8.25795	-4.73752	21.4082	207.627	771.13	1662.18	2627.87	3695.18	4677.62	5501.77	6391.46
266	-19.7372	-16.0927	-8.98371	-4.11167	21.264	204.51	775.902	1659.51	2633.3	3689.84	4682.16	5508.59	6386.01
266.5	-18.4446	-16.7397	-8.62413	-3.26935	21.1315	204.344	774.103	1658.22	2637.45	3687.58	4684.11	5517.09	6393.45
267	-18.3349	-17.2558	-7.84191	-3.57981	20.1764	207.87	774.238	1665.7	2636.45	3682.02	4682.2	5526.45	6410.88
267.5	-19.4213	-14.7892	-7.46991	-3.76672	21.5798	208.517	777.342	1668.15	2637.04	3682.83	4687.04	5518.14	6426.62
268	-19.2951	-15.5827	-7.89564	-4.76112	21.4368	206.083	779.395	1668.38	2642.28	3685.74	4693.41	5500.12	6423.43
268.5	-19.4498	-15.3457	-8.3084	-4.44047	22.2647	207.454	780.179	1668.78	2655.6	3687.66	4698.02	5484.48	6423.96
269	-18.7372	-14.1375	-7.88938	-4.4119	23.0407	211.6	780.439	1671.86	2675.5	3691.2	4695.71	5474.42	6425.45
269.5	-19.5714	-14.5278	-7.99869	-4.38663	24.2797	214.762	778.663	1680.22	2684.37	3699.36	4691.3	5485.95	6416.17
270	-19.6741	-13.5698	-7.76694	-3.99958	24.7808	218.268	778.961	1684.59	2677.43	3710.03	4695.77	5495.1	6413.46
270.5	-19.0958	-13.0047	-7.91046	-3.56267	24.6351	220.055	785.151	1681.17	2677.07	3709.89	4695.09	5501.03	6419.64
271	-19.6018	-12.7444	-7.51403	-3.47227	22.8958	220.158	791.452	1678.72	2680.5	3711.31	4688.85	5496.21	6437.29
271.5	-18.1486	-13.3501	-7.30348	-3.8724	25.1545	219.585	795.847	1678.05	2692.71	3714.11	4685.94	5494.44	6452.87
272	-19.5233	-13.3188	-8.81874	-3.36187	24.8188	216.871	798.323	1675.71	2704.53	3728.34	4685.58	5506.49	6448.42
272.5	-18.7844	-14.065	-8.52018	-4.9617	22.783	216.589	793.045	1669.75	2703.2	3734.97	4683.6	5519.56	6449.98
273	-19.5627	-14.3862	-9.40525	-4.12308	23.4147	221.617	789.895	1668.49	2695.65	3738.8	4688.16	5527.14	6454.73
273.5	-18.5501	-14.3028	-9.83549	-5.2097	23.5544	222.341	793.307	1670.76	2696.37	3748.59	4695.3	5527.68	6457.08
274	-19.185	-14.5007	-8.85144	-5.01565	23.5666	223.7	797.863	1671.17	2703.9	3754.09	4702.53	5534.8	6461.1
274.5	-18.0078	-15.5021	-8.28864	-4.44288	24.216	225.948	802.472	1671.14	2704.39	3758.1	4711.6	5531.51	6470.15
275	-18.2261	-13.7946	-8.69669	-3.93535	25.6351	227.565	798.257	1674.8	2702.42	3763.01	4715.22	5528.62	6474.52
275.5	-18.1707	-13.3736	-9.58299	-4.3493	24.6509	228.043	794.634	1679.24	2705.54	3765.27	4716.56	5530.22	6470.97
276	-18.6633	-12.686	-9.19685	-4.67545	23.906	229.807	796.522	1686.2	2703.68	3773.84	4710.71	5535.47	6474.34
276.5	-19.2913	-14.7712	-8.09524	-4.99044	25.1664	229.9	796.604	1696.17	2716.72	3778.45	4711.4	5543.75	6477.9
277	-17.4795	-14.7955	-7.5764	-5.82418	24.8214	224.785	798.485	1697.28	2725.81	3779.98	4715.89	5553.82	6491.53
277.5	-18.7198	-13.3954	-9.02418	-4.54195	24.9222	225.61	801.462	1692.06	2727.78	3780.48	4722.33	5559.87	6501.54
278	-18.9137	-13.6233	-10.5106	-4.34484	24.8399	227.471	807.916	1687.39	2733.4	3783.31	4734.43	5555.85	6503.97
278.5	-18.5715	-14.052	-8.4255	-4.00543	25.7215	227.939	808.861	1688.49	2728.76	3787.88	4736.8	5550.37	6501.93
279	-20.4553	-12.6211	-7.65971	-5.07141	25.7347	233.141	811.832	1688.81	2729.47	3790.09	4737.85	5556.44	6498.32
279.5	-19.7804	-13.3004	-8.98016	-4.94426	25.1815	236.296	812.139	1690.64	2731.64	3786.69	4733.32	5569.52	6497.72
280	-19.7788	-14.8541	-9.5886	-5.45569	26.4073	240.319	812.329	1699.39	2733.84	3786.13	4734.67	5572.8	6501.33
280.5	-18.705	-15.7674	-8.39502	-3.96271	25.572	242.46	816.582	1698.37	2732.36	3785.7	4737.28	5585.78	6495.77
281	-19.3515	-14.2229	-9.70318	-3.11788	25.7632	241.716	822.138	1698.51	2742.33	3789.33	4750.57	5592.48	6489.35
281.5	-19.2853	-14.5192	-9.12945	-3.65902	25.246	240.864	823.447	1695.23	2755.96	3790.38	4763.74	5601.29	6496.66
282	-18.1551	-14.8436	-8.8948	-6.47953	25.637	243.03	825.282	1705.78	2767.11	3789.73	4758.58	5599.3	6500.29
282.5	-19.216	-15.2279	-8.25701	-5.01915	25.8226	249.003	830.167	1710.06	2771.74	3788.41	4752.59	5595.66	6496.94
283	-18.8514	-14.2225	-8.29413	-4.3608	27.1531	254.496	835.258	1707.29	2772.69	3787.11	4762.97	5596.79	6494.85
283.5	-19.2618	-14.4105	-8.73269	-4.60191	27.7509	252.007	841.794	1712.27	2771.24	3789.52	4771.14	5593.85	6489.27
284	-20.2039	-13.9368	-7.92768	-3.87619	27.9352	250.825	843.31	1719.2	2772.62	3795.57	4776.82	5598.02	6484.05
284.5	-19.9627	-15.1676	-7.94764	-4.73566	28.6124	251.45	847.056	1717.98	2772.89	3803.4	4785.13	5608.25	6476.99
285	-19.4445	-14.3885	-8.16002	-3.33716	28.5689	251.857	850.687	1724.77	2768.03	3808.79	4783.02	5616.03	6487.71
285.5	-19.9879	-14.8331	-7.5467	-4.06725	28.1907	251.842	852.538	1728.28	2763.28	3806.64	4781.69	5609.2	6496.9
286	-20.2594	-15.0681	-7.25117	-3.96844	26.9335	252.488	848.478	1725.66	2768.86	3805.18	4794.15	5613.34	6480.28
286.5	-19.5306	-14.8204	-7.53426	-3.33266	27.6246	252.128	851.693	1727.92	2781.02	3801.85	4803.02	5615.11	6470.79
287	-18.3852	-13.4495	-8.93356	-2.36647	26.1251	251.456	858.027	1735.77	2782.71	3808.86	4795.84	5603.41	6473.57
287.5	-20.4204	-15.1952	-9.95414	-1.53514	26.9906	252.013	857.817	1743.85	2776.17	3818.04	4790.92	5606.33	6473.1
288	-19.0844	-15.5449	-9.29016	-2.54946	26.9312	250.916	863.184	1749.29	2769.63	3812.37	4799.42	5616.45	6476.41
288.5	-17.7587	-14.6518	-7.37634	-4.57201	28.6864	252.406	868.6	1749.06	2768.16	3799.5	4800.99	5617.38	6474.21
289	-19.2318	-14.3574	-8.7248	-3.95444	30.9281	252.959	866.156	1756.13	2775.7	3795.64	4795.26	5608.43	6467.84
289.5	-18.0601	-14.0941	-9.02711	-3.05414	29.8062	254.868	864.918	1763.07	2785.09	3794.58	4790.89	5602	6463.23
290	-18.8144	-13.6956	-9.52555	-2.47331	28.2953	257.162	866.453	1763.73	2797.67	3792.37	4788.53	5615.22	6452.47
290.5	-19.6244	-14.1576	-8.83443	-3.6867	28.9733	257.124	868.012	1758.76	2798.33	3793.06	4788.22	5618.59	6452.37
291	-18.4367	-13.491	-10.1566	-3.33331	28.2621	257.472	875.37	1761.58	2800.88	3795.38	4791.94	5617.5	6462.79
291.5	-18.9737	-14.2082	-9.59967	-3.35528	27.1875	258.912	877.564	1762.95	2807.46	3802.01	4788.34	5623.04	6469.42
292	-18.3486	-15.1054	-8.34638	-4.35983	29.3498	259.086	877.607	1763.63	2813.83	3807.45	4783.44	5630.27	6475.95
292.5	-18.0037	-13.9892	-9.73203	-4.10156	27.5245	258.156	880.723	1768.69	2820.17	3812.48	4785.22	5637.29	6490.03
293	-18.6402	-14.593	-9.06205	-3.34543	24.2164	259.173	883.01	1778.96	2830.08	3821.07	4784.26	5641.43	6496.36
293.5	-18.4465	-14.5577	-9.832	-4.80029	25.4692	259.105	887.253	1788.5	2829.71	3831.47	4775.26	5639.37	6493.08
294	-18.7726	-12.6176	-8.94422	-4.41729	27.3218	262.185	894.931	1797.08	2826.37	3837.47	4773.25	5631.72	6484.04
294.5	-19.3636	-14.3861	-8.1395	-3.19532	28.1821	266.579	901.938	1796.82	2824.48	3835.24	4774.87	5644.09	6479.93
295	-18.1074	-13.7031	-8.4459	-4.42211	29.1797	268.906	904.343	1794.57	2827.11	3830.17	4772.18	5655.77	6483.44
295.5	-18.969	-14.7704	-8.88228	-3.29213	29.9377	267.552	908.833	1795.92	2836.59	3822.92	4781.2	5664.08	6488.23
296	-16.9364	-16.1517	-10.3869	-4.48128	31.0112	267.021	913.687	1798.88	2841.43	3818.49	4789.37	5669.1	6494.71
296.5	-18.1219	-16.1745	-9.81114	-4.78881	29.9493	260.546	914.456	1802.71	2843.28	3827.53	4792.66	5670.92	6491.2
297	-17.9179	-14.5186	-10.1007	-4.5604	30.4249	259.697	916.94	1813.48	2840.29	3831.68	4784.23	5677	6472.01
297.5	-19.1284	-15.4093	-9.35081	-4.19524	31.2089	259.779	918.241	1816.62	2838.11	3832.18	4778.05	5669.02	6468
298	-17.001	-15.4951	-7.78304	-4.51402	32.4566	265.82	917.876	1814.09	2840.67	3834.34	4777.14	5666.23	6475.08
298.5	-17.597	-16.0234	-9.38279	-4.86624	31.6686	265.502	919.105	1807.94	2842.57	3837.95	4778.09	5659.22	6487.84
299	-18.2469	-14.8864	-9.90731	-5.00097	31.1288	259.922	918.499	1796.14	2856.5	3835.66	4774.99	5657.97	6498.97
299.5	-20.1396	-13.5473	-7.54104	-4.53307	31.2786	257.771	921.809	1795.66	2867.01	3828.13	4765.01	5657.58	6507.84
300	-19.9604	-15.1584	-8.12866	-5.64173	34.8457	261.2	922.243	1799.29	2869.1	3832.51	4767.09	5663.31	6511.68
300.5	-18.746	-14.9701	-10.2051	-4.94464	33.9345	263.533	924.17	1799.4	2869.42	3835.67	4773.16	5667.98	6521.4
301	-18.2481	-15.3307	-10.34	-5.53594	32.3506	263.718	925.339	1803.16	2866.82	3830.07	4779.51	5680.95	6534.43
301.5	-18.7014	-14.0852	-7.93083	-3.67974	30.0886	262.205	924.493	1806.57	2865.98	3831.8	4795.04	5695.36	6537.32
302	-18.1491	-13.7173	-7.17668	-4.36163	30.1003	260.366	927.842	1810.29	2861.1	3830.72	4802.29	5694.12	6539.7
302.5	-16.9067	-15.045	-7.82762	-3.12288	29.6219	262.059	933.902	1808.31	2868.28	3825.16	4811.94	5689.01	6555.19
303	-17.6771	-14.5608	-8.52053	-3.26303	29.7874	264.776	938.256	1813.32	2870.57	3830.38	4821.67	5688.68	6554.08
303.5	-18.679	-13.902	-9.37357	-3.14732	30.7658	266.66	939.744	1813.73	2871.47	3848.24	4830.38	5693.39	6552.94
304	-19.8114	-15.1226	-9.23666	-2.75754	30.9028	269.14	935.616	1820.93	2873.25	3860.27	4833.9	5702.91	6553.33
304.5	-19.0323	-16.0464	-7.89025	-3.7976	30.9968	269.163	930.847	1826.75	2870.62	3855.79	4836.19	5702.04	6555.31
305	-18.5024	-14.4555	-7.05581	-3.33362	27.9183	265.642	931.982	1825.5	2871.5	3853.39	4834.24	5694.31	6545.22
305.5	-17.0145	-13.5204	-8.29516	-3.04983	28.341	267.751	934.654	1826.95	2876.92	3861.07	4828.6	5695.42	6545.54
306	-17.2385	-13.4955	-7.76567	-4.32984	28.1209	271.82	937.355	1831.84	2874.1	3870.79	4823.53	5696.5	6550.35
306.5	-17.6331	-14.3503	-8.44812	-3.62229	27.8243	274.192	944.382	1837.55	2872.08	3874.46	4819.96	5695.56	6555.85
307	-17.3808	-13.0357	-10.0894	-3.2633	27.2113	275.334	950.145	1845.95	2875.8	3864.57	4815.66	5698.19	6558.83
307.5	-16.5578	-13.5607	-9.56187	-4.95548	27.238	276.312	954.871	1849.92	2879.91	3852.75	4825.13	5698.5	6549.4
308	-16.5556	-13.6146	-8.38406	-5.25043	28.0624	278.416	958.998	1854.91	2882.43	3842.36	4829.21	5700.3	6550.23
308.5	-16.4384	-12.9842	-9.08579	-5.61128	29.3134	277.958	961.012	1855.62	2886.2	3832.51	4817.64	5700.85	6557.85
309	-17.8829	-14.6403	-10.6498	-5.34613	29.315	278.112	958.588	1857.25	2889.79	3834.38	4823.42	5691.05	6549.3
309.5	-17.189	-14.161	-9.34476	-7.24563	28.1588	280.081	952.055	1853.31	2895.37	3843.81	4838.15	5695.61	6543.65
310	-16.8066	-13.627	-9.01204	-6.11246	27.0553	278.402	951.919	1844.75	2899.54	3831.38	4853.45	5695.79	6554.11
310.5	-18.2019	-13.1011	-8.26281	-6.08426	26.6969	277.468	953.391	1844.35	2895.17	3821.76	4868.58	5698.07	6547.32
311	-18.4854	-13.9273	-9.68097	-6.51254	27.6869	276.456	955.899	1847.23	2890.41	3825.56	4864.2	5710.83	6539.76
311.5	-19.1756	-13.2927	-8.88878	-5.53328	28.6356	278.392	960.419	1847.38	2897.65	3831.42	4861.46	5722.66	6545.78
312	-18.1948	-13.1122	-7.97746	-4.11571	27.1751	281.149	964.353	1845.99	2903.04	3837.4	4860.89	5719.87	6540.99
312.5	-18.0334	-14.7027	-9.20731	-4.01937	25.3648	283.727	966.427	1847.07	2910.31	3834.74	4857.51	5719.19	6538.71
313	-18.2073	-14.424	-8.38375	-4.74536	27.0411	287.964	967.21	1846.95	2916.94	3828.3	4851.9	5726.89	6542.67
313.5	-19.13	-15.3833	-9.86611	-4.87801	27.5603	288.767	965.544	1848.6	2919.6	3825.5	4845.24	5733.71	6549.96
314	-19.1377	-15.0403	-8.75091	-5.54627	28.9288	288.541	961.002	1852.17	2924.69	3829.8	4850.75	5738.16	6555.23
314.5	-19.8455	-13.8936	-9.28055	-7.05397	31.0454	289.114	959.208	1851.88	2936.8	3832.17	4849.37	5741.34	6570.96
315	-19.1776	-14.4881	-8.74008	-6.52908	30.124	290.093	963.268	1845.5	2943.41	3830.22	4840.89	5738.6	6587.03
315.5	-20.0979	-13.8797	-7.41292	-5.39394	29.2521	295.335	962.451	1841.09	2943	3823.69	4845.03	5735.77	6595.79
316	-19.4231	-13.076	-8.35973	-3.7219	29.0895	294.934	962.217	1840.45	2927.92	3819.41	4852.37	5731.63	6587.09
316.5	-20.6653	-14.3295	-8.99808	-3.62622	30.1229	293.425	961.781	1839.12	2917.12	3819.67	4855.16	5726.18	6581.48
317	-19.1552	-14.6197	-9.27733	-3.03118	32.8467	292.828	960.862	1845.12	2913.76	3825.6	4854.43	5724.07	6580.42
317.5	-20.0854	-13.9513	-9.40359	-4.41055	33.2101	294.292	957.799	1848.58	2911.01	3833.66	4857.5	5726.73	6571.51
318	-20.1183	-14.7312	-9.39798	-5.29869	32.5994	298.664	956.497	1858.07	2913.49	3833.68	4863.35	5729.27	6564.43
318.5	-19.3499	-14.5083	-8.89133	-5.07242	32.2362	303.835	959.778	1854.58	2914.13	3832.78	4866.28	5740.54	6565.13
319	-17.4549	-14.7969	-8.72519	-5.23336	33.2794	305.933	959.57	1846.74	2918	3829.62	4863.08	5749.18	6569.1
319.5	-18.507	-14.3017	-7.29011	-4.20206	32.1035	305.26	961.904	1855.8	2919.53	3829.81	4865.61	5756.42	6570.3
320	-19.524	-14.656	-8.04003	-3.14545	31.4635	309.013	961.908	1863.47	2922.24	3835.15	4873.56	5747.68	6577.51
320.5	-19.1355	-14.9985	-7.90505	-4.60123	29.9703	307.36	965.082	1868.32	2925.66	3849.55	4874.75	5732.99	6584.97
321	-18.8871	-14.0518	-7.14552	-5.21009	31.0303	308.511	965.288	1877.89	2932.69	3849.17	4861.49	5727.56	6582.04
321.5	-19.1036	-14.4916	-6.36216	-5.64044	32.2985	307.371	965.957	1883.01	2925.02	3853.51	4848.53	5727.57	6589.59
322	-18.8476	-12.6945	-7.78057	-6.3669	31.6997	305.309	967.169	1881.4	2917.52	3852.85	4844.63	5728.67	6598.6
322.5	-18.5571	-12.6638	-6.28127	-4.989	30.7248	304.874	965.209	1888.87	2908.99	3855.32	4846.6	5725.99	6601.33
323	-18.3338	-13.8621	-8.50648	-5.34528	30.2918	305.666	967.811	1895.99	2903.41	3865.84	4845.22	5720.66	6584.83
323.5	-18.3872	-14.1327	-9.58062	-5.55104	30.9457	301.839	966.512	1901.71	2904.35	3869.71	4850.12	5724.23	6569.65
324	-17.7202	-13.1374	-9.46485	-4.43701	31.7243	299.854	967.725	1896.68	2901	3861.96	4845.04	5719.89	6573.33
324.5	-18.0574	-12.6339	-8.91765	-5.45867	32.626	300.206	972.589	1894.1	2904.63	3862.6	4841.19	5710.08	6577.02
325	-18.1914	-13.2786	-9.84894	-4.99281	32.0577	299.255	976.991	1893.87	2906.67	3865.81	4842.6	5718.12	6570.72
325.5	-19.6472	-13.6415	-8.75199	-4.35946	31.4342	304.488	983.052	1899.12	2909.04	3854.06	4862.7	5723.87	6566.58
326	-19.4267	-12.9435	-8.79918	-5.91583	32.8145	306.329	984.004	1903.81	2911.51	3840.13	4877.51	5724.13	6567.1
326.5	-17.8148	-14.1276	-9.17892	-5.77738	31.4316	308.168	983.787	1904.46	2917.61	3834.45	4871.62	5717.27	6565.89
327	-18.8073	-13.0448	-8.60303	-5.38634	31.2774	308.531	984.169	1909.65	2924.82	3842.05	4867.07	5721.22	6563.12
327.5	-19.2144	-13.5514	-9.29837	-4.38404	30.8224	306.591	989.12	1909.21	2923.09	3854.89	4866.41	5717.24	6570.27
328	-19.2211	-14.7591	-9.16051	-3.62107	30.8281	306.872	992.834	1910.4	2916.13	3855.35	4862.58	5713.25	6585.33
328.5	-18.529	-14.8046	-9.60732	-3.96448	28.8122	306.47	991.754	1916.39	2911.92	3856.22	4862.75	5712	6579.55
329	-19.5406	-14.4508	-9.83531	-5.36638	27.413	310.191	994.696	1918.25	2914.14	3864.97	4864.77	5707.41	6584.87
329.5	-18.0538	-14.1106	-9.81017	-3.65921	28.5062	310.949	1001.04	1916.27	2916.25	3871.65	4869.31	5714.5	6597.33
330	-16.7513	-14.2158	-9.95884	-3.60321	28.6612	311.867	1006.41	1918.03	2914.45	3881.47	4870.51	5726.64	6598.3
330.5	-18.8079	-13.8405	-7.10779	-2.93657	29.601	313.878	1010.74	1915.96	2906.32	3883.67	4861.7	5735.62	6597.53
331	-18.4922	-14.9488	-9.23028	-4.15543	32.7716	319.013	1012.6	1916.94	2904.94	3879.74	4854.16	5741.37	6605.89
331.5	-18.6411	-16.0573	-10.0079	-5.23207	32.7365	320.05	1012.88	1918.07	2908.29	3869.1	4845.75	5737.01	6611.48
332	-18.1623	-15.1962	-8.96501	-4.04143	31.3725	321.625	1017.05	1924.64	2908.6	3866.96	4847.72	5737.16	6613.76
332.5	-19.6914	-13.603	-10.6412	-4.81878	32.4673	320.813	1014.21	1923.3	2906.23	3871.51	4845.87	5742.15	6616.09
333	-20.0023	-13.0421	-9.17874	-3.52606	31.9504	324.486	1009.82	1923.85	2908.14	3871.47	4843.28	5737.25	6610.87
333.5	-18.8967	-14.821	-9.01457	-3.60084	33.7095	327.275	1010.6	1919.76	2905.45	3875.52	4834.56	5743.04	6616.34
334	-19.0271	-15.0564	-7.5183	-3.21204	31.7545	326.093	1007.94	1916.54	2907.71	3880.11	4833.31	5752.03	6624.03
334.5	-17.3527	-15.191	-6.85928	-2.32461	32.0842	325.703	1004.38	1911.38	2909.56	3877.37	4840.67	5754.4	6632.89
335	-17.1827	-14.3947	-8.40964	-4.29362	31.3686	330.4	1000.7	1909.15	2920.89	3884.65	4840.27	5753.43	6635.96
335.5	-19.2517	-12.9147	-7.91187	-4.18231	32.8595	333.017	1001.69	1917.71	2930.64	3895.4	4845.5	5743.28	6631.98
336	-18.3338	-12.97	-7.483	-5.53254	32.9095	333.41	1008.41	1926.05	2930.59	3903.64	4846.8	5751.76	6629.96
336.5	-18.4039	-14.673	-7.59999	-4.89121	33.6607	335.513	1010.89	1932.56	2932.74	3908.52	4844.2	5760.8	6623.43
337	-19.702	-15.3005	-8.5286	-4.85767	32.0806	333.906	1012.65	1934.71	2931.8	3916.75	4847.94	5760.32	6624.69
337.5	-18.89	-13.9744	-8.89678	-4.47918	33.5198	335.933	1019.74	1932.63	2932.57	3933.56	4848.37	5759.19	6635.39
338	-19.5172	-12.2607	-8.84167	-5.63175	35.556	336.387	1022.58	1932.9	2934.03	3937.58	4854.74	5759.12	6639.67
338.5	-19.1808	-12.7699	-8.27367	-4.61315	35.3964	336.562	1022.04	1941.22	2936.68	3938.48	4858.11	5766.23	6636.28
339	-19.3087	-13.8369	-7.98848	-5.77931	36.239	334.061	1023.8	1943.7	2935.31	3938.91	4861.34	5772.52	6638.54
339.5	-18.5965	-13.6693	-8.16035	-3.6786	36.0903	335.168	1019.3	1942.02	2931.02	3933.49	4866.67	5774.56	6634.84
340	-17.9028	-12.7855	-9.45274	-3.91935	38.4026	334.562	1016.67	1948.14	2934.38	3920.67	4865.61	5761.86	6628.18
340.5	-18.8373	-12.987	-9.67626	-5.22436	39.8039	330.035	1013.69	1949.54	2931.45	3921.25	4877.18	5756.22	6622.81
341	-17.8266	-14.1013	-9.43537	-6.49312	38.2231	332.286	1022.76	1946.06	2924.97	3921.21	4887.62	5760.64	6624.79
341.5	-17.7607	-14.3037	-8.93855	-6.82573	36.1515	334.711	1033.91	1942.76	2924.26	3922.7	4893.72	5759.69	6620.05
342	-20.1735	-13.2514	-9.69199	-6.77373	36.1649	330.312	1034.29	1943.18	2931.48	3927.63	4902.83	5754.28	6621.83
342.5	-18.2204	-14.7041	-8.85774	-5.45919	35.8252	329.653	1024.78	1952.74	2936.79	3935.32	4897.29	5746.47	6622.22
343	-18.4884	-14.5845	-10.2054	-5.2093	35.7438	328.938	1021.45	1954.22	2939.32	3944.33	4888.61	5748.64	6610.32
343.5	-19.3685	-13.9675	-8.70835	-6.02408	36.3732	330.302	1023.45	1951.9	2943.3	3952.48	4889.5	5738.69	6599.85
344	-19.5146	-12.6107	-9.78319	-5.97383	37.6116	339.639	1029.8	1944.7	2946.44	3950.18	4891.81	5731.22	6603.31
344.5	-18.8937	-14.8247	-10.3522	-5.64555	36.9276	346.892	1031.09	1943.44	2941.97	3938.04	4891.37	5734.54	6605.08
345	-17.2518	-15.1298	-9.75426	-5.93303	39.3347	348.674	1029.81	1950.29	2949.2	3931.3	4897.33	5737.22	6605.24
345.5	-16.999	-14.5614	-9.64074	-4.56924	41.4959	345.989	1027.54	1952.52	2961.11	3946.94	4897.66	5745.28	6610.78
346	-17.3692	-13.7298	-10.0079	-4.32182	40.5224	345.261	1030.36	1949.07	2973.13	3965.26	4897.33	5759.33	6616.91
346.5	-19.3729	-14.4756	-9.3828	-6.33085	41.4604	346.392	1035.1	1948.21	2985.42	3973.59	4899.41	5757.93	6616.43
347	-19.7287	-13.9969	-9.25255	-6.31535	39.9566	343.461	1036.55	1950.94	2988.6	3976.14	4898.55	5755.31	6619.03
347.5	-20.2427	-13.4218	-9.5446	-5.71803	37.5969	343.232	1037.66	1952.67	2981.51	3968.72	4889.41	5764.31	6624.55
348	-19.7093	-14.2	-9.84919	-4.13602	37.7086	346.066	1034.06	1947.72	2978.08	3964.82	4877.77	5776.78	6614.36
348.5	-18.3678	-14.5789	-8.6739	-4.11578	38.3536	349.464	1034.03	1946.13	2975.69	3968.85	4880.97	5790.38	6607.09
349	-18.2619	-15.6238	-8.45913	-4.6169	39.2295	347.545	1035.7	1946.23	2971.76	3979.7	4881.56	5802.69	6615.19
349.5	-20.2121	-14.3339	-9.32395	-4.74241	40.595	348.255	1041.77	1953.77	2970.83	3993.29	4882.07	5806.26	6625.73
350	-21.0147	-14.5837	-8.73114	-4.49278	42.0825	349.581	1048.04	1960	2982.25	3996.24	4881.46	5805.05	6636.37
350.5	-20.2022	-15.2488	-9.39048	-3.58077	43.1833	350.288	1051.88	1963.36	2998.82	3991.33	4882.28	5806.57	6646.73
351	-20.9053	-14.7623	-8.73449	-3.36463	41.1812	350.059	1049.99	1973.93	3001.56	3988.17	4874.44	5807.06	6651.55
351.5	-19.6349	-13.5766	-8.39439	-2.46185	38.7402	348.331	1048.86	1974.02	3001.36	3990.93	4878.41	5813.15	6649.78
352	-19.845	-14.2663	-8.56506	-2.55186	39.465	346.305	1050.54	1979.95	2999.64	3990.67	4881.95	5814.74	6637.13
352.5	-19.7577	-14.6364	-7.26802	-4.4384	39.3097	344.702	1053.2	1986.21	2995.57	3987.45	4882.22	5816.1	6632.07
353	-19.3006	-14.2803	-7.85677	-3.80664	39.0818	345.251	1054	1989.5	2998.74	3981.2	4880.21	5807.29	6634.74
353.5	-19.6242	-13.4543	-7.63854	-4.80435	40.5508	348.328	1058.89	1993.7	3002.3	3968.69	4877.41	5805.02	6636.77
354	-20.1775	-13.341	-8.16035	-3.43443	42.5719	348.599	1068.2	1996.53	2999.9	3963.2	4871.46	5822.32	6643.77
354.5	-19.2712	-12.7005	-7.98591	-3.60165	44.3278	348.366	1069.31	1992.23	2991.18	3960.56	4873.42	5828.62	6643.92
355	-18.9219	-11.9575	-7.98119	-4.38464	44.9505	347.916	1066.13	1993.22	2989.92	3948.69	4869.36	5825.32	6645.36
355.5	-19.5129	-12.5426	-8.37793	-2.67138	43.7279	348.344	1067.25	1992.08	2993.05	3942.72	4869.78	5819	6646.37
356	-18.5187	-12.7724	-7.83854	-3.44659	42.9276	345.903	1064.51	1992.13	2978.3	3946.35	4875.43	5813.26	6650.94
356.5	-19.3046	-12.6988	-8.60785	-5.80428	43.9726	346.583	1059.98	1990.46	2965.12	3955.37	4877.53	5807.7	6659.45
357	-19.3275	-12.8577	-8.19491	-3.45525	43.4723	349.44	1061.4	1991.99	2958.44	3965.65	4879.5	5810.74	6650.95
357.5	-18.832	-12.1722	-8.11857	-4.24522	42.0005	350.585	1073.8	1995.08	2959.15	3967.77	4876.75	5809.59	6650.4
358	-19.1163	-13.9176	-9.2328	-5.29872	41.9431	350.802	1081.01	1995.73	2967.48	3976.27	4873.53	5813.22	6651.95
358.5	-19.2742	-13.2815	-9.70544	-5.29486	43.7725	354.539	1078.22	1994.45	2985.47	3991.84	4867.54	5816.09	6660.9
359	-19.4014	-13.8916	-9.14991	-5.35425	43.1475	355.794	1071.92	1991.99	3001.28	4000.18	4872.99	5819.6	6661.96
359.5	-19.6851	-13.7881	-8.66669	-5.18361	41.5869	354.43	1065.97	1990.26	3005.51	3996.84	4875.23	5812.28	6654.89
360	-19.432	-12.1134	-9.46005	-5.14815	41.5108	354.835	1064.45	1991.63	3008.65	3996.84	4875.76	5805.91	6654.05
360.5	-17.8349	-11.9924	-10.7947	-4.67391	43.1309	354.451	1067.72	1992.38	3016.39	3999.61	4869.13	5820.44	6639.62
361	-18.3491	-12.3476	-7.86856	-6.58683	43.0016	353.263	1074.06	1994.97	3008.95	4001.83	4863.77	5827.59	6640.06
361.5	-19.3632	-14.0042	-7.55336	-4.96448	43.3627	350.818	1066.29	2003.36	2992.53	3999.2	4860.73	5825.79	6652.35
362	-19.7473	-16.2812	-8.12034	-4.83629	44.5836	348.466	1054.61	1999.96	2981.9	4008.15	4856.37	5823.18	6658.61
362.5	-19.6295	-14.5097	-8.60069	-6.22627	47.8676	349.579	1056.09	1996.8	2983.81	4021.39	4851.78	5819.34	6652.91
363	-19.0105	-14.1996	-7.60406	-5.37915	47.5631	349.204	1061.85	2001.05	2975.68	4020.97	4847.03	5809.87	6649.45
363.5	-19.5275	-14.1978	-8.45475	-4.00908	49.3318	348.31	1063.58	1998.44	2972.05	4016.4	4856.67	5809.24	6648.59
364	-18.727	-15.9582	-8.41752	-4.72463	52.7514	346.472	1065.33	1999.58	2981.88	4012.11	4864.34	5811.24	6648.25
364.5	-18.1205	-15.9186	-9.92679	-5.65975	52.4181	343.517	1069.25	1999.28	2993.03	4016.62	4854.72	5816.41	6654.81
365	-18.6087	-15.7238	-9.08868	-4.00636	51.9861	342.128	1075.43	1997.35	2991.62	4025.21	4851.95	5822.24	6648.24
365.5	-20.239	-14.018	-7.55984	-3.66736	50.9998	340.93	1071.07	1995.04	2988.36	4017.75	4858.9	5808.49	6642.1
366	-20.2365	-15.4929	-8.00191	-2.25884	49.0261	341.498	1069.65	1989.63	2993.83	4002.25	4867.53	5802.7	6644.81
366.5	-19.0495	-14.5072	-8.3385	-2.7424	47.6598	343.926	1067.59	1983.28	2999.14	3990.54	4870.22	5798.86	6642.2
367	-18.9082	-13.9333	-9.3461	-3.49296	48.151	343.349	1062.21	1987.45	3011.13	3984.15	4876.21	5798.42	6634.67
367.5	-19.904	-13.2835	-9.65173	-3.31511	48.8119	341.722	1065.6	1997.43	3007.39	3988.33	4876	5801.4	6627.38
368	-19.288	-13.4181	-8.26115	-3.12469	48.0189	341.087	1073.39	2001.99	3005.71	3995.48	4885.18	5813.75	6626.37
368.5	-18.8289	-14.0643	-7.93052	-3.91624	48.6137	342.448	1079.72	2001.85	3012.21	3997.85	4895.12	5807.94	6635.3
369	-18.0378	-14.3615	-6.51296	-3.56633	48.952	347.959	1086.23	2006	3011.98	4001.16	4902.47	5806.65	6653.02
369.5	-19.933	-15.065	-8.1281	-3.2822	49.1296	354.085	1085.49	2011.47	3013.92	4010.07	4904.46	5811.98	6665.11
370	-21.507	-13.3727	-8.29819	-4.17449	46.6882	354.421	1083.47	2013.85	3016.62	4002.73	4907.85	5816.2	6672.54
370.5	-21.1236	-14.9434	-8.27587	-3.87609	47.453	353.301	1085.85	2016.48	3014.85	3994.25	4906.09	5824.83	6680.52
371	-19.5483	-14.7354	-9.66372	-3.93818	49.961	353.718	1081.68	2018.71	3013.04	3986.93	4917.33	5826.73	6669.58
371.5	-20.0797	-14.3289	-9.44196	-5.4912	50.4922	354.831	1078.38	2023.51	3016.71	3991.22	4922.44	5820.12	6667.85
372	-19.6007	-14.1682	-8.2857	-4.8646	49.0672	356.619	1078.76	2020.74	3016.02	3992.84	4926.13	5818.5	6676.51
372.5	-19.2073	-14.2187	-7.80223	-4.07422	47.9462	357.702	1080.33	2013.13	3020.53	3994.96	4929.39	5818.22	6688.61
373	-18.7775	-13.2832	-7.70709	-5.11683	47.6993	355.784	1085.54	2014.5	3022.59	3993.79	4932.7	5829.56	6693.52
373.5	-18.5269	-13.4858	-8.6915	-5.61979	48.9282	355.647	1090.27	2016.59	3035.81	3991.39	4938.65	5841.27	6693.08
374	-17.584	-13.1355	-9.02861	-4.29413	46.9826	356.686	1092.41	2015.13	3042	3993.11	4934.43	5849.8	6691.6
374.5	-18.1352	-14.7948	-7.90511	-5.23878	46.9148	358.237	1096.12	2009.48	3035.76	3985.79	4921.65	5847.31	6687.91
375	-17.0795	-15.6938	-7.90304	-3.15624	48.305	359.026	1104.65	2006.24	3030.09	3981.41	4911.59	5844.02	6689.66
375.5	-18.3439	-15.9088	-8.66184	-6.24612	47.9781	357.087	1110.37	2003.98	3030.22	3980.63	4914.13	5837.54	6689.17
376	-16.8619	-13.6992	-9.59931	-5.3488	45.2923	358.932	1111.74	2001.83	3028.38	3988.9	4916.92	5829.69	6699.66
376.5	-16.9308	-13.0078	-9.06008	-5.22521	46.5651	357.386	1111.89	2002.29	3024.78	3998.6	4918.09	5827.36	6708.57
377	-17.9444	-13.4386	-9.26989	-5.94137	46.491	354.692	1110.27	2003.45	3020.29	3995.8	4917.41	5841.26	6700.22
377.5	-17.2523	-13.7344	-9.03152	-3.73161	48.3342	354.375	1111.12	2002.35	3026.2	3995.74	4917.46	5850.22	6704.41
378	-17.1577	-13.5225	-9.75972	-4.47724	47.5843	352.089	1109.49	2001.03	3035	3986.98	4921.29	5851.22	6719.48
378.5	-18.1299	-14.1953	-9.71177	-5.24493	48.0846	352.809	1106.7	1999.01	3040.17	3977.66	4919.39	5848.6	6728.85
379	-18.3582	-14.7133	-9.0891	-4.73752	49.206	355.57	1103.84	1998.79	3037.91	3974.14	4913.47	5846.24	6729.68
379.5	-17.9263	-13.1948	-8.65643	-4.64961	47.4343	356.943	1099.73	2002.68	3042.6	3971.63	4914.17	5844.7	6716.72
380	-17.5335	-14.7122	-9.40423	-4.71504	46.2666	356.405	1096.88	2003.69	3049.72	3973.65	4915.71	5837.37	6706.94
380.5	-18.5641	-14.5748	-8.14272	-5.57781	49.4436	356.274	1099.68	2004.96	3045.46	3968.89	4910.61	5843.08	6697.01
381	-18.1394	-14.7605	-10.0693	-5.30584	52.1996	358.337	1105.71	2013.73	3046.6	3960.43	4909.44	5858.99	6690.29
381.5	-18.4648	-15.1536	-9.95899	-5.06252	50.8613	357.302	1108.92	2025.2	3048.76	3959.14	4913.92	5857.58	6699.94
382	-16.2037	-16.0254	-9.29502	-5.63143	50.3326	351.343	1106.72	2026.65	3051.02	3954.33	4919.69	5852.2	6701.62
382.5	-18.4646	-14.8115	-8.17191	-4.96696	48.482	351.435	1113.07	2021.79	3051.03	3949.94	4917.94	5840.34	6701.93
383	-20.6329	-14.3589	-8.03817	-5.23045	49.063	355.153	1117.29	2019.49	3040.75	3949.2	4923.39	5816.74	6693.47
383.5	-18.8665	-14.5577	-7.99744	-7.04471	51.1619	355.478	1121.22	2016.47	3034.88	3947.66	4923.27	5800.6	6695.36
384	-17.0776	-14.0183	-8.39204	-5.69903	54.9434	354.606	1124.52	2017.08	3026.2	3948.67	4925.2	5799.49	6685.33
384.5	-19.7395	-14.0593	-8.90177	-5.09749	53.8301	357.87	1125.56	2019.44	3023.91	3946.02	4928.71	5803.72	6676.19
385	-19.9083	-14.1645	-8.07046	-5.7929	54.2609	364.18	1128.69	2015.09	3027.67	3942.31	4931.09	5796.04	6683.27
385.5	-18.9649	-14.8184	-9.68389	-4.99603	52.5258	365.418	1125.2	2021.6	3021.96	3946.16	4938.75	5787.9	6690.22
386	-19.3066	-14.277	-8.35612	-6.06927	54.3471	368.321	1124.09	2031.61	3019.67	3952.17	4953.27	5789.69	6686.58
386.5	-20.9426	-14.6947	-8.38878	-4.53606	55.7281	376.277	1129.29	2034.1	3027.74	3957.08	4950.49	5805.34	6690.56
387	-19.3703	-13.2317	-7.48569	-3.58211	54.8018	378.649	1131.48	2037.42	3028.92	3969.14	4947.3	5819.3	6707.14
387.5	-19.8843	-14.0902	-8.3459	-4.03872	53.5746	380.434	1131.51	2038.49	3032.43	3969.85	4937.69	5819.81	6722.18
388	-18.1985	-14.0013	-8.01266	-4.77798	53.4351	384.011	1127.14	2034.73	3037.56	3963.75	4940.92	5815.85	6727.04
388.5	-17.8278	-13.9567	-7.20804	-3.15761	52.7845	384.614	1126.01	2032.54	3039.59	3968.35	4946.59	5821.79	6730.02
389	-17.1677	-12.7199	-7.68201	-3.64319	52.4363	383.592	1128.23	2036.3	3046.99	3967.16	4949.7	5826.53	6731.12
389.5	-17.4389	-13.6457	-8.89747	-3.64459	52.6394	384.162	1131.29	2034.13	3052.84	3974.09	4948.84	5830.65	6737.17
390	-17.8908	-12.8692	-8.23744	-4.30976	51.3405	390.075	1133.79	2032.14	3052.81	3986.07	4949.07	5824.1	6755.73
390.5	-18.4635	-12.7037	-7.99627	-5.05429	50.7288	390.832	1134.82	2030.15	3052.84	3988.31	4944.15	5806.45	6755.32
391	-19.4327	-13.3409	-8.0021	-5.46825	52.7392	389.745	1132.96	2027.52	3062.49	3991.28	4950.35	5809.1	6751.13
391.5	-19.7871	-13.7	-7.82421	-6.55497	54.1084	383.792	1129.78	2026.46	3072	3992.37	4951.59	5810.03	6746.68
392	-19.9437	-14.7064	-8.66116	-6.01943	54.8293	380.384	1124.73	2028.4	3070.37	3991.5	4954.69	5815.98	6748.18
392.5	-19.6031	-13.411	-8.95802	-6.7378	53.5948	380.878	1122.16	2030.49	3065.97	3991.49	4963.54	5821.95	6751.02
393	-19.0914	-12.7022	-9.01602	-5.89354	53.5795	380.143	1122.27	2030.29	3065.04	3988.38	4969.66	5825.72	6752.79
393.5	-18.7498	-13.527	-9.09612	-6.02001	54.3659	380.504	1120.27	2027.95	3069	3982.39	4966.61	5825.79	6754.73
394	-16.9112	-12.5139	-9.14013	-6.36494	56.239	380.776	1122.9	2030.12	3075.04	3978.5	4959.36	5822.27	6757.08
394.5	-16.6835	-12.4093	-9.27	-6.88585	55.6851	380.752	1128.95	2029	3076.32	3981.25	4945.05	5808.82	6742.91
395	-17.79	-12.9266	-9.73353	-6.72114	55.902	384.912	1126.75	2029.49	3064.23	3983.5	4945.36	5801.75	6735.02
395.5	-17.9662	-13.3645	-10.5754	-6.02788	53.8498	386.263	1118.93	2027.99	3059.32	3995.45	4955.41	5801.67	6726.01
396	-17.9249	-13.3823	-9.11511	-7.15478	52.1077	389.921	1118.44	2025	3061.75	4005.61	4964.82	5811.18	6725.3
396.5	-19.003	-13.3352	-8.69484	-7.47419	52.4867	393.992	1120.62	2026.49	3067.39	3995.72	4971.1	5813.5	6731.79
397	-19.3979	-13.8365	-8.42876	-7.14147	52.7891	393.662	1124.19	2029.01	3068.54	3987.65	4976.44	5809.24	6731.78
397.5	-17.7891	-14.0232	-9.20135	-5.88421	52.6524	392.79	1132.48	2026.94	3063.79	3981.53	4973.23	5806.8	6736.34
398	-18.9075	-14.2837	-8.68038	-5.43224	54.4637	396.51	1134.86	2027.27	3065.62	3972.61	4969.09	5812.23	6742.98
398.5	-18.7061	-13.9413	-8.58716	-6.1302	55.6258	399.513	1134.73	2025.2	3074.32	3976.24	4972.51	5810.36	6751.18
399	-19.99	-13.7637	-8.1015	-4.56732	57.7999	401.364	1130.96	2019.4	3071.08	3973.65	4980.42	5817.49	6756.77
399.5	-19.505	-13.7487	-9.03176	-4.75119	58.0949	401.456	1129.3	2010.23	3068.38	3971.58	4982.3	5827.79	6755.29
400	-18.479	-13.1311	-8.18658	-4.63932	57.6665	399.465	1127.76	2012.1	3071.81	3971.59	4983.17	5824.72	6750.57
400.5	-20.516	-13.0174	-8.02695	-3.40003	57.8816	398.135	1125.67	2014.16	3075.61	3964.27	4980.77	5807.81	6751.6
401	-20.4242	-14.0224	-8.0277	-5.78798	56.9552	395.156	1129.11	2011.76	3068.29	3956.79	4979.62	5817.73	6755.41
401.5	-18.9465	-13.8644	-9.43305	-5.39807	55.2738	395.054	1136.43	2011.35	3063.32	3964.26	4979.77	5835.91	6765.29
402	-19.758	-13.4826	-9.9443	-4.70782	56.4918	392.006	1144.66	2024.97	3056.71	3984.53	4975.06	5834.31	6769.17
402.5	-19.6367	-12.6334	-8.12783	-4.60607	56.9653	391.412	1144.64	2038.3	3069.61	3999.07	4978.99	5841.75	6773.27
403	-20.3838	-13.3745	-8.35363	-3.75682	56.2826	390.524	1143.51	2037.7	3081.55	4003.14	4984.76	5841.84	6768.7
403.5	-19.4562	-13.2874	-9.46734	-5.09648	56.357	391.651	1144.72	2031.48	3085.89	4007.87	4980.3	5837.55	6766.34
404	-17.591	-13.916	-10.0349	-5.69645	54.7752	388.306	1150.89	2038.45	3083.48	4010.25	4971.67	5839.73	6759.05
404.5	-17.3967	-14.0401	-10.2013	-7.06548	55.4737	386.363	1156.57	2044.05	3087.43	4012.65	4966.2	5839.12	6755.52
405	-18.0766	-12.9177	-8.61746	-5.10164	55.3322	391.49	1154.89	2049.74	3089.66	4010.43	4962.35	5834.67	6747.28
405.5	-17.6892	-13.335	-8.47511	-5.10474	54.3977	394.376	1151.73	2054.66	3096.25	4007.14	4967.32	5844.73	6747.24
406	-17.1415	-12.9028	-9.07447	-5.96817	56.7661	392.753	1143.69	2053.15	3102.85	4000.87	4964.89	5858.14	6746.15
406.5	-18.3099	-13.5328	-10.3862	-6.90098	57.1608	390.298	1140.94	2053.63	3101.48	3996.18	4958.6	5866.17	6744.68
407	-18.1185	-11.5789	-8.42502	-5.90808	55.8584	394.88	1141.25	2055.14	3095.85	3997.52	4964.46	5868.32	6740.01
407.5	-16.9305	-13.8827	-8.34729	-4.01877	56.4986	396.806	1137.43	2050.9	3103.86	4006.36	4967.78	5868.72	6737.36
408	-17.9906	-12.9852	-8.34006	-5.17527	55.3623	395.196	1134.13	2042.13	3117.61	4016.83	4965.25	5869.27	6742.49
408.5	-17.4567	-12.8477	-8.12519	-5.71153	55.3329	394.57	1139.23	2039.43	3121.08	4026.86	4965.09	5872.51	6747.16
409	-18.3154	-13.599	-8.25513	-5.56208	55.8438	389.225	1145.5	2037.3	3123.51	4030.54	4976.47	5877.2	6755.22
409.5	-19.1614	-13.9079	-9.28479	-6.0872	54.9821	386.561	1147.51	2038.46	3126.84	4027.09	4993.16	5882.99	6760.25
410	-17.2796	-12.828	-9.84683	-5.52974	54.2934	387.427	1147.4	2044.98	3126.87	4027.52	5000.03	5872.66	6767.43
410.5	-17.0049	-14.1147	-8.37919	-5.77365	53.3622	388.045	1144.74	2051.79	3130.76	4022.78	5009.07	5864.15	6766.6
411	-18.0076	-12.6997	-8.22728	-5.02508	53.8287	384.752	1146.27	2059.01	3132.63	4011.08	5013.13	5862.57	6749.38
411.5	-17.1067	-12.3332	-9.10096	-4.74329	54.3528	384.309	1147.09	2058.29	3128.37	4011.48	5005.52	5865.07	6746.86
412	-17.5122	-13.6269	-9.81888	-5.92423	55.7894	387.264	1147.53	2057.49	3119.87	4017.14	5011.2	5862.87	6755.67
412.5	-18.7662	-12.8978	-10.4249	-6.80757	54.4191	386.769	1144.51	2068.36	3109.29	4020.3	5015.67	5861.32	6775.64
413	-19.529	-13.3503	-9.98361	-5.50574	52.8966	385.808	1143.47	2072.99	3100.24	4028.75	5018.28	5851.14	6778.88
413.5	-17.9028	-15.7182	-9.77217	-4.97022	51.985	392.139	1143.06	2075.87	3097.97	4030.34	5021.98	5844.72	6777.22
414	-17.631	-16.687	-9.33335	-5.14666	53.6328	394.105	1146.44	2070.58	3097.28	4038.97	5022.57	5846.02	6780.69
414.5	-18.738	-15.3696	-10.8849	-5.25679	53.9952	391.611	1148.65	2065	3101.45	4035.54	5023.34	5845.34	6780.21
415	-19.2402	-14.7859	-10.7987	-2.58368	53.5095	389.118	1151.37	2062.58	3107.8	4030.66	5022.23	5853.01	6786.5
415.5	-19.6529	-15.4973	-8.7304	-2.07709	55.4917	384.408	1155.02	2059.52	3114.43	4035.2	5019.77	5861.87	6787.57
416	-19.7711	-14.4578	-9.16721	-4.25861	57.4096	381.543	1149.33	2064.54	3121.97	4040.52	5015.86	5858.96	6778.08
416.5	-19.7385	-14.4984	-9.24466	-3.82133	58.0854	382.408	1144.35	2063.14	3120.93	4038.35	5016.48	5845.81	6775.1
417	-19.4739	-14.3538	-8.10345	-3.03245	57.2644	386.216	1150.3	2060.85	3124.9	4037.26	5021.9	5833.25	6774.27
417.5	-18.8671	-15.7371	-9.73785	-1.95971	58.1909	388.267	1154.8	2052.65	3131.93	4038.33	5030.14	5837.38	6774.22
418	-19.088	-15.1795	-9.25912	-0.656654	60.2532	387.471	1158.24	2044.99	3137.71	4038.99	5027.69	5842.45	6774.66
418.5	-19.5448	-15.2845	-7.185	-0.957197	62.7235	384.596	1164.06	2047.27	3140.06	4039.38	5030.27	5851.35	6776.02
419	-20.4464	-14.866	-7.78976	-1.53981	63.5972	382.32	1162.43	2055.81	3143.02	4035.78	5034.04	5855.02	6776.73
419.5	-19.8852	-16.2885	-7.93782	-1.59263	62.1364	386.988	1161.1	2066.04	3144.25	4036.58	5040.47	5848.1	6769.64
420	-20.4083	-14.9293	-7.24642	-2.88589	62.6864	385.383	1161.03	2077.05	3137.18	4031.74	5044.59	5839.71	6767.93
420.5	-20.0522	-15.336	-8.90024	-2.01834	59.5636	385.714	1160.73	2078.28	3132.92	4022.96	5037.83	5836.16	6770.61
421	-19.0536	-14.5714	-8.42835	-2.22142	58.8989	387.555	1157.14	2073.07	3126.07	4012.68	5034.18	5831.79	6781.63
421.5	-19.9307	-14.3958	-8.56652	-3.33363	56.8251	385.057	1154.02	2073.24	3129.64	4014.53	5028.93	5842.2	6790.93
422	-18.6091	-15.7765	-8.08522	-2.73508	56.8673	380.5	1155.26	2070.01	3136.26	4025.19	5026.36	5852.86	6790.93
422.5	-20.4223	-14.5224	-7.81182	-2.16222	57.6746	376.156	1164.56	2066.81	3139.76	4034.36	5036.53	5848.1	6793.91
423	-20.8046	-13.5859	-8.21683	-3.36287	58.3246	378.803	1168.19	2069.99	3140.03	4036.88	5043.65	5843.07	6799.87
423.5	-19.1181	-12.8895	-7.95384	-3.77981	59.0682	382.533	1162.9	2074.95	3134.99	4035.51	5040.12	5852.41	6802.26
424	-18.9405	-13.9619	-8.37443	-3.10375	59.0482	385.379	1160.53	2074.07	3128.64	4036.77	5038.16	5861.58	6793.37
424.5	-19.8427	-12.6543	-9.4784	-4.51931	57.4121	388.259	1159.79	2069.42	3118.92	4026.1	5035.52	5866.87	6783.14
425	-19.5299	-13.9649	-10.3374	-4.56113	57.503	388.658	1157.44	2070.22	3113.58	4018.4	5029.72	5859.59	6768.44
425.5	-20.1671	-13.6568	-10.2823	-2.58244	58.6371	387.1	1158.2	2070.66	3119.14	4019.05	5028.73	5854.29	6761.11
426	-19.9017	-13.3718	-10.0385	-2.38078	58.7231	386.411	1156.32	2070.28	3128.84	4020.97	5027.72	5852.33	6756.2
426.5	-19.3883	-14.2876	-9.39682	-4.16239	58.4593	385.972	1156.95	2065.78	3137.39	4018.12	5025.68	5845.35	6741.16
427	-18.4733	-12.672	-8.55086	-4.18145	59.4607	383.146	1165.33	2064.36	3137.17	4014.17	5023.02	5846.22	6742.72
427.5	-17.5856	-13.3791	-9.76762	-4.29181	60.7817	384.52	1170.9	2065.52	3134.97	4016.59	5026.48	5860.75	6748.17
428	-18.6568	-14.1392	-10.5888	-4.55349	61.773	386.409	1170.33	2061.38	3135.34	4020.26	5025.83	5857.3	6757.81
428.5	-18.706	-13.8833	-9.96012	-4.34187	61.8939	387.499	1169.22	2058.96	3134.81	4020.47	5025.28	5857.96	6770.81
429	-18.0564	-14.6143	-9.56085	-4.72637	61.5205	385.065	1172.09	2063.84	3137.89	4022.95	5019.55	5863.61	6779.69
429.5	-19.3163	-14.7479	-10.013	-3.90478	62.4609	382.021	1172.94	2070.1	3134.58	4024.95	5010.93	5872.9	6782.57
430	-20.0685	-14.5699	-9.64495	-3.81228	64.5931	380.677	1179.94	2069.33	3132.46	4035.73	5021.62	5873.27	6790.31
430.5	-21.0369	-15.3458	-9.45057	-5.12351	64.2092	378.565	1182.98	2068.71	3133.61	4037.28	5036.42	5871	6799.77
431	-19.6293	-16.0676	-9.14869	-6.50446	62.9814	377.18	1180	2065.51	3136.19	4035.87	5045.8	5869.96	6795.7
431.5	-19.592	-15.345	-8.9725	-6.11135	63.3928	377.387	1179.04	2063.45	3131.37	4039.33	5052.66	5872.04	6790.29
432	-19.8882	-15.3317	-9.58142	-5.87143	63.6989	381.507	1184.56	2067.61	3132.9	4044.65	5047.86	5881.25	6784.24
432.5	-19.0937	-16.1154	-8.46423	-6.06132	62.2861	384.278	1184.48	2064.64	3137.23	4047.62	5051.85	5886.53	6775.48
433	-19.2058	-14.4348	-9.182	-5.20711	60.1042	388.784	1179.67	2066.82	3134.9	4044.66	5058.16	5897.35	6770.71
433.5	-18.899	-14.5962	-8.88748	-4.38391	59.5054	392.72	1180.31	2072.69	3133.1	4038.15	5062	5905.05	6760.83
434	-19.7709	-15.4531	-7.81687	-4.81607	59.5639	401.964	1181.53	2079.33	3138.86	4033.12	5069.45	5903.28	6766.55
434.5	-20.9358	-15.0781	-8.59871	-4.50829	58.6785	406.296	1182.95	2084.39	3137.37	4034.06	5071.3	5903.64	6776.12
435	-20.4425	-15.5906	-8.15936	-6.33551	60.6728	408.266	1188.37	2088.1	3134.38	4039.03	5063.1	5895.37	6785.75
435.5	-21.0721	-14.3209	-8.07826	-5.39729	61.9498	406.961	1192.93	2091.73	3131.71	4042.54	5052.58	5892.81	6792.82
436	-22.2293	-14.9592	-8.15837	-4.52799	61.6867	408.015	1199.67	2090.4	3134.78	4039.69	5054.79	5893.17	6789.94
436.5	-20.3019	-15.3583	-9.63344	-6.77401	61.2974	407.004	1203.56	2083.16	3137.5	4043.2	5061.93	5894.13	6798.37
437	-20.1337	-15.1491	-6.45205	-6.29483	60.8158	411.48	1203.03	2079.71	3139.08	4051.54	5062.53	5885.92	6795.42
437.5	-20.368	-15.064	-6.06446	-4.99095	58.7097	415.578	1197.88	2084.99	3137.6	4051.78	5057.09	5885.69	6790.78
438	-19.3629	-13.9904	-9.01922	-4.35796	58.9818	418.472	1195.12	2082.34	3135.7	4051.72	5050.74	5881.94	6791.3
438.5	-18.8966	-13.7503	-7.91793	-4.5058	56.3214	419.904	1188.58	2080.08	3136.65	4041.05	5046.54	5876.69	6782.19
439	-19.7581	-12.3291	-7.25401	-4.69976	55.706	425.183	1187.6	2078.21	3139.36	4042.7	5053.31	5878.98	6776.48
439.5	-19.6006	-13.1476	-8.47861	-5.7264	56.3227	430.136	1188.03	2067.55	3138.77	4046.35	5057.75	5869.47	6783.79
440	-20.4073	-13.7273	-8.22946	-7.15611	54.9138	431.174	1189.46	2066.9	3131.26	4051.68	5046.61	5872.47	6789.4
440.5	-20.7195	-14.279	-7.59831	-6.44386	54.0464	433.112	1195.23	2077.81	3121.03	4055.67	5043.29	5888.21	6790.66
441	-19.139	-14.8955	-8.24368	-4.59447	55.4507	431.482	1194.64	2094.18	3114.6	4053.32	5031.53	5897.73	6779.03
441.5	-18.9364	-14.4643	-9.00247	-5.3147	53.4369	428.988	1190.76	2104.45	3120.1	4061.52	5027.14	5900.91	6769.53
442	-16.473	-12.7151	-8.66003	-6.10359	55.0225	431.536	1191.1	2107.21	3125.93	4062.37	5030.97	5902.57	6774.13
442.5	-17.0498	-13.617	-9.36951	-5.17088	57.8786	430.211	1195.68	2110.51	3126.65	4065.86	5033.8	5902.17	6779.63
443	-19.7589	-13.1565	-7.82035	-3.90481	58.0525	429.064	1194.92	2112.63	3136.16	4064.99	5025.22	5910.11	6784.73
443.5	-19.3579	-14.0424	-7.78774	-2.61304	56.0332	424.455	1196.64	2107.62	3142.52	4066.4	5024.05	5923.2	6792.4
444	-19.2477	-12.5921	-8.35649	-4.49689	56.4342	420.394	1203.89	2105.69	3138.47	4068.93	5030.71	5920.88	6784.73
444.5	-18.6023	-14.0608	-9.43966	-4.94539	56.6775	414.828	1208.97	2098.98	3137.69	4060.06	5037.22	5918.82	6780.65
445	-18.898	-13.2788	-9.57121	-4.44496	56.766	416.392	1215.55	2094.8	3141.79	4056.08	5041.1	5917.49	6764.3
445.5	-18.6223	-13.4654	-9.12129	-5.09176	56.8742	418.873	1219.94	2101.75	3148.71	4058.65	5047.28	5912.87	6750.4
446	-17.8886	-14.4446	-8.54218	-5.38504	59.112	417.672	1220.71	2106.27	3148.86	4055.27	5044.31	5912.17	6759.32
446.5	-18.022	-14.5994	-9.01998	-5.26305	58.0504	412.507	1218.6	2107.81	3135.46	4054.56	5036.79	5920.7	6769
447	-19.4458	-15.2524	-9.75045	-3.87464	55.5227	413.688	1215.2	2113.26	3120.42	4065	5040.06	5933.04	6764.29
447.5	-19.3043	-16.0234	-9.75334	-5.61616	54.5811	414.091	1213.17	2116	3117.63	4067.2	5045.76	5951.02	6766.03
448	-19.4968	-15.3915	-8.99329	-5.86751	55.4084	408.342	1215.02	2108.91	3121.32	4068.84	5054.43	5951.38	6763.19
448.5	-19.5015	-15.8465	-8.85403	-7.30277	56.2553	400.711	1219.17	2106.75	3128.04	4068.24	5045.18	5944.61	6756.06
449	-18.4993	-15.9968	-9.12269	-5.08944	55.9729	400.5	1219.69	2100.32	3124.67	4065.89	5037.9	5940.04	6751.61
449.5	-18.5116	-15.5455	-7.94777	-4.70021	56.5303	401.382	1220.78	2095.85	3119.83	4063.14	5038.13	5938.5	6735.23
450	-18.9727	-14.7379	-7.82072	-5.90383	58.389	404.319	1221.34	2097.06	3118.16	4065.59	5035.59	5935.25	6720.71
450.5	-19.0761	-15.3984	-9.41241	-4.62381	58.692	412.019	1221.33	2104.55	3128.06	4065.29	5027	5923.14	6708.24
451	-19.4053	-14.5076	-6.85484	-2.238	58.6767	414.304	1216.13	2111.07	3135.93	4065.63	5024.55	5912.34	6704.27
451.5	-19.424	-14.8092	-6.58361	-4.01416	60.0429	418.519	1203.55	2111.9	3141.76	4061.87	5025.74	5907.68	6704.57
452	-18.9801	-15.6559	-7.51793	-4.15158	61.02	422.513	1202.92	2108.28	3141.49	4055.71	5019.17	5911.46	6712.09
452.5	-19.5273	-15.4174	-6.91778	-3.54422	59.8554	422.748	1203.19	2104.96	3134.35	4064.92	5013.37	5918.94	6710.12
453	-19.2141	-13.9827	-6.84947	-4.38201	59.5035	422.72	1199.94	2108.39	3128.49	4067.19	5002.95	5924.43	6714.57
453.5	-20.0199	-14.1264	-7.98919	-5.58243	60.3478	420.536	1193.22	2112.1	3124.5	4061.48	4992.22	5923.14	6712.9
454	-18.8437	-14.5304	-7.41087	-4.3885	63.0074	420.992	1188.95	2107.09	3115.44	4070.22	4996.55	5929.55	6712.42
454.5	-20.1241	-13.6303	-8.59514	-4.35081	64.7523	423.697	1193.42	2105.22	3110.96	4084.33	4994.54	5932.04	6713.38
455	-19.7747	-12.8526	-9.15333	-4.45962	64.4712	424.851	1196.47	2103.59	3109.67	4090.55	4997.02	5932.83	6703.97
455.5	-18.3096	-13.9342	-8.8346	-3.1606	63.5118	423.901	1193.2	2105.54	3109.63	4092.89	4993.59	5936.4	6702.17
456	-18.7565	-13.5349	-8.26192	-3.56143	64.2855	425.941	1188.24	2102.93	3107.18	4100.72	4990.76	5932.19	6711.45
456.5	-20.1896	-13.9487	-6.88875	-3.50938	64.8523	428.447	1187.5	2100.19	3102.36	4100.62	4996.6	5930.55	6722.82
457	-19.768	-14.3572	-7.82789	-5.16979	63.7312	432.398	1186.9	2097.03	3099.59	4089.14	4998.4	5927.95	6715.92
457.5	-19.3582	-13.5504	-8.04608	-3.93699	63.5688	434.629	1189.06	2088.74	3095.8	4081.17	5001.15	5923.27	6721.4
458	-18.868	-15.1111	-8.48654	-3.28719	62.8675	433.646	1187.14	2082.69	3091.74	4081.25	5007.31	5921.4	6723.72
458.5	-19.1252	-13.5493	-9.08643	-4.66621	61.4542	429.348	1186.36	2080.73	3092.16	4087.45	5008.69	5919.12	6729.08
459	-17.607	-12.9174	-7.21995	-3.17198	60.6287	429.481	1183.42	2084.7	3104.78	4088.16	5013.07	5918.41	6744.54
459.5	-18.2095	-11.6136	-8.86513	-2.61225	59.5872	429.868	1185.17	2092.75	3118.14	4083.3	5015.1	5921.62	6752.75
460	-18.8487	-14.3084	-10.1705	-2.58783	60.6315	431.498	1186.94	2097.19	3121.86	4100.39	5003.86	5923.51	6757.91
460.5	-17.9597	-15.024	-8.50923	-3.22327	59.2139	431.967	1186.55	2104.36	3125.37	4109.05	5007.45	5915.29	6759.69
461	-18.2529	-15.2411	-9.76419	-3.2136	58.9217	426.07	1181.59	2104.07	3128.95	4109.04	5013.8	5906.25	6758.27
461.5	-19.6885	-13.3326	-8.58568	-4.54124	57.9982	426.075	1180.24	2099.81	3125.63	4107.39	5012.42	5909.12	6744.29
462	-20.0514	-14.9326	-8.54574	-4.69387	60.8122	428.509	1180.05	2096.04	3111.9	4103.61	5008.83	5901.72	6746.29
462.5	-17.6139	-16.3886	-9.35604	-3.1764	62.8783	431.948	1184.43	2096.83	3103.69	4097	5009.49	5897.04	6751.98
463	-17.6375	-14.4164	-9.87464	-3.33097	61.5791	431.182	1183.37	2102.66	3104.12	4098.29	5020.23	5908.01	6752.88
463.5	-18.0191	-14.8929	-9.34914	-2.72244	62.0124	432.592	1182.84	2108.11	3114.08	4104.34	5019.47	5908.55	6757.83
464	-19.3039	-16.3328	-9.16406	-3.60735	61.8306	433.024	1185.41	2109.62	3115.49	4109.4	5013.64	5904.82	6758.49
464.5	-17.6882	-16.7033	-9.19512	-2.5544	65.1807	431.574	1189.34	2104.24	3116.78	4103.15	5013.3	5909.17	6769.61
465	-19.4249	-13.4454	-10.044	-1.08013	65.5204	431.518	1188.84	2097.88	3119.04	4103.65	5015.48	5913.78	6778.75
465.5	-19.3625	-13.2813	-10.0006	-1.23484	65.3118	431.113	1187.94	2101.4	3124.94	4098.51	5019.68	5914.42	6778.25
466	-17.5815	-13.5551	-9.73792	-1.28915	65.8887	433.558	1191.49	2105.69	3128.64	4092.96	5019.19	5909.28	6777.56
466.5	-18.5355	-14.7459	-8.27693	-2.44093	65.5203	437.995	1193.08	2107.21	3121.49	4093.59	5013.12	5916.51	6775.9
467	-18.5823	-15.2006	-8.82075	-2.90452	65.5451	439.722	1195.6	2112.13	3113.64	4091.77	5014.88	5924.06	6772.91
467.5	-19.2222	-15.9449	-8.32875	-4.19781	65.6737	437.146	1197.57	2115.49	3111.92	4089.1	5005.28	5928.47	6766.09
468	-18.4679	-15.0678	-8.5449	-1.34257	65.302	433.444	1203.05	2112.61	3112.97	4092.34	4994.08	5926.81	6763.75
468.5	-17.8384	-16.1696	-9.12927	-2.17338	64.7686	433.407	1211.13	2104.32	3116.39	4097.5	4995.59	5922.81	6763.54
469	-19.022	-15.5633	-8.60492	-2.7456	64.0025	433.944	1213.1	2102.45	3129.73	4109.43	4994.14	5926.43	6769.78
469.5	-17.6798	-14.1613	-6.87406	-4.21035	64.3849	433.586	1209.79	2103.14	3136.27	4108.38	4997.47	5940.3	6782.39
470	-18.2292	-15.3443	-7.66885	-3.13723	63.8437	435.103	1206.97	2101.17	3127.43	4093.55	5004.66	5943.39	6792.78
470.5	-18.5894	-15.2261	-8.64491	-2.25287	62.9544	433.12	1196.07	2101.26	3118.95	4089.64	5010.16	5932.6	6796.79
471	-17.6964	-14.8113	-6.457	-2.36916	62.1955	432.93	1190.77	2105.71	3117.11	4101.2	5017.32	5926.65	6803.29
471.5	-16.959	-14.279	-6.95011	-1.98438	62.4395	432.88	1192.54	2101.29	3112.14	4108.28	5021.26	5923.72	6802.43
472	-19.1263	-13.4061	-7.9618	-2.36824	61.7438	438.084	1196.22	2100.88	3101.86	4110.63	5022.47	5915.71	6802.03
472.5	-16.9546	-13.8545	-7.93006	-3.58684	60.8357	439.078	1202.55	2105.52	3100.39	4118.78	5023.88	5911.46	6813.7
473	-17.9203	-13.1262	-7.39948	-4.25626	59.7176	437.618	1202.12	2105.78	3105.26	4126.26	5033.81	5910.84	6836.13
473.5	-18.2455	-13.7641	-8.26934	-3.53482	61.4529	432.93	1207.73	2112.71	3109.41	4128.81	5042.63	5915.59	6841.1
474	-17.513	-15.0845	-8.52346	-2.68557	61.7327	430.032	1213.19	2116.79	3110.36	4127.43	5036.9	5927.2	6837.03
474.5	-17.4262	-14.0649	-7.77899	-1.63652	61.3504	428.851	1209.57	2115.7	3105.43	4121.02	5037.06	5933.26	6832.71
475	-17.3901	-14.1421	-7.70473	-3.44502	61.4251	428.749	1211.91	2120.97	3104.78	4122.14	5037.67	5932.82	6828.99
475.5	-16.7519	-14.6707	-8.92898	-2.09618	61.9034	430.108	1213.53	2124.17	3109.32	4118.44	5039.74	5928.48	6814.41
476	-16.2922	-14.0133	-9.23382	-3.80873	65.1412	428.966	1211.76	2124.08	3119.48	4118.03	5040.69	5931.16	6805.17
476.5	-17.5722	-14.9439	-8.83099	-3.74916	65.296	424.359	1216.5	2123.33	3120.88	4127.45	5039.8	5933.03	6810.99
477	-16.8384	-14.5035	-10.1328	-5.3395	65.0004	427.513	1224.61	2120.21	3124.56	4118.24	5037.73	5918.18	6816.84
477.5	-16.5405	-13.5775	-10.0163	-3.16409	64.3908	431.16	1223.46	2119.85	3130.13	4110.7	5042	5916.2	6821.94
478	-17.3348	-14.0737	-8.28674	-3.36754	64.2434	431.11	1218.46	2119.99	3128.68	4115.43	5046.75	5928.75	6821.98
478.5	-18.1472	-14.6723	-9.18789	-3.76156	60.7783	429.3	1217.13	2121.85	3124.63	4121.66	5049.27	5929.18	6819.32
479	-18.0575	-14.9192	-9.44158	-3.99803	58.94	429.866	1215.4	2123.43	3119.35	4127.28	5045.59	5925.46	6822.32
479.5	-18.4687	-13.5161	-9.4871	-1.95177	56.9688	430.697	1210.94	2120.76	3108.55	4135.67	5045.43	5924.98	6823.82
480	-19.8454	-14.1446	-10.0837	-1.90052	58.5086	430.444	1205.36	2112.83	3109.92	4134.69	5049.37	5918.67	6814.71
480.5	-18.04	-14.5552	-10.1551	-2.12496	61.222	430.965	1203.24	2112.5	3110.21	4124.73	5057.06	5908.59	6803.09
481	-17.8469	-14.9016	-8.16028	-3.16315	62.2306	427.714	1200.54	2118.23	3109.16	4119.26	5061.31	5921.22	6788.8
481.5	-17.9279	-16.1564	-9.06197	-3.42912	63.4189	427.834	1198.19	2118.37	3115.23	4125.81	5061.06	5931.49	6783.62
482	-17.9165	-15.1275	-9.89291	-3.1083	62.2919	430.248	1202.54	2120.59	3110.71	4124.57	5057.78	5934.67	6775.36
482.5	-17.8806	-13.9876	-10.1773	-1.79482	62.787	431.074	1206.77	2117.84	3113.86	4119.96	5065.08	5939.27	6766.61
483	-18.3367	-14.4164	-10.4593	-0.5962	63.3365	427.484	1205.4	2112.97	3120.88	4126.95	5072.07	5943.79	6763.56
483.5	-17.9977	-15.4043	-10.4441	-2.18092	62.0164	428.431	1208.72	2108.67	3124.35	4131.11	5074.26	5931.37	6759.46
484	-19.0307	-15.6053	-8.92232	-2.74381	63.3418	431.164	1205.6	2107	3129.36	4133.91	5061.72	5918.05	6770.83
484.5	-19.0174	-15.298	-9.28867	-3.57209	61.721	436.136	1206.63	2111.6	3128.08	4135.15	5060.79	5915.93	6783.7
485	-18.3885	-13.3213	-8.90924	-1.54769	59.5453	435.472	1208.69	2116.53	3126.9	4126.31	5067.91	5913.84	6784.36
485.5	-18.5555	-14.9394	-9.70802	-1.5615	59.2095	430.857	1208.95	2111.85	3129.44	4121.79	5061.56	5913.52	6788.88
486	-20.2131	-14.8204	-9.71096	-2.0101	56.9108	430.296	1214.38	2104.56	3138.08	4125.27	5053.41	5926.97	6786.96
486.5	-19.0756	-15.3823	-8.78555	-2.31777	57.8041	429.829	1214.89	2113.55	3137.92	4127.5	5056.76	5937.09	6788.99
487	-18.3708	-13.8206	-9.74296	-1.54264	57.7764	430.248	1216.62	2122.99	3133.73	4128.61	5057.57	5934.86	6782.76
487.5	-18.3142	-13.6631	-9.73612	-3.70955	58.5212	431.629	1220.71	2121.33	3131.57	4131.3	5056.91	5936.74	6791.5
488	-17.2558	-14.0555	-8.89812	-3.5671	61.4056	431.557	1220.22	2126.55	3128.36	4137.04	5055.17	5940.48	6797.65
488.5	-17.23	-13.7392	-10.1576	-1.92051	61.4941	437.306	1218.76	2132.19	3133.24	4137.37	5060.89	5952.08	6805.14
489	-17.7568	-13.5985	-9.49121	-3.37946	61.2443	442.047	1217.25	2134.21	3133.44	4125.39	5058.56	5949.51	6814.83
489.5	-20.3547	-14.3599	-9.11865	-4.83554	63.9332	441.54	1215.16	2140.62	3125.49	4116.99	5054.13	5944.28	6819.62
490	-19.751	-13.7773	-8.8361	-5.08897	64.9246	441.969	1218.08	2141.87	3125.65	4121.23	5060.99	5944.94	6817.11
490.5	-18.5135	-14.2652	-8.86746	-5.32068	65.1826	443.107	1216.95	2135.42	3123.34	4123.47	5060.89	5941.69	6820.63
491	-17.7811	-13.7472	-7.97512	-4.2407	63.3552	441.422	1212.98	2123.68	3127.44	4119.13	5066.74	5948.59	6818.78
491.5	-18.9767	-13.4348	-9.1112	-5.59276	60.387	443.125	1212.79	2114.51	3127.79	4126.53	5076.75	5960.87	6809.78
492	-18.1182	-12.2029	-8.48044	-5.25644	61.4876	443.841	1212.35	2119.02	3137.73	4123.15	5077.27	5963.69	6809.79
492.5	-18.2297	-13.3829	-9.00904	-5.57682	62.8717	442.046	1216.03	2119.44	3151.17	4126.24	5077.9	5955.16	6816.33
493	-17.3121	-14.3362	-9.87923	-6.05753	63.5829	438.715	1218.78	2121.83	3154.71	4130.36	5085.52	5963.83	6817.45
493.5	-17.0917	-14.4923	-8.89977	-3.88059	66.3261	436.992	1219.6	2130.03	3149.49	4134.29	5078.94	5974.03	6814.66
494	-16.4854	-14.8463	-10.3507	-4.34003	67.4692	437.824	1216.18	2129.96	3145.08	4141.31	5078.18	5969.57	6815.46
494.5	-18.2604	-14.8463	-9.4338	-5.04413	67.1592	439.822	1213.89	2131.85	3149.5	4148.1	5080.88	5971.11	6812.95
495	-18.1269	-15.3463	-9.35068	-3.64674	65.8106	436.774	1220.25	2134.94	3154.06	4151.63	5077.51	5973.81	6809.53
495.5	-18.0187	-15.7136	-10.3393	-4.67946	62.5864	430.509	1221.2	2133.52	3148.62	4152.19	5077.77	5977.28	6820.33
496	-18.454	-13.5587	-8.57367	-3.54816	60.3477	424.829	1225.85	2128.92	3146.76	4148.17	5073.56	5979.2	6829.36
496.5	-18.6878	-13.9147	-9.24481	-4.23321	60.9483	425.445	1232.19	2118.59	3152.93	4146.65	5078.69	5964.23	6813.28
497	-18.2861	-14.6002	-8.59363	-3.78504	62.6638	429.168	1233.05	2110.77	3163.7	4153.02	5078.3	5961.91	6799.47
497.5	-19.3604	-15.3253	-8.25159	-3.0062	61.163	430.867	1229	2110.11	3171.77	4151.05	5079.72	5962.7	6799.79
498	-18.9535	-15.5657	-9.13753	-2.23904	62.1055	432.919	1224.88	2114.09	3163.19	4158.32	5087.43	5963.03	6792.02
498.5	-17.31	-14.5605	-9.17413	-2.57008	64.1852	433.568	1223.94	2118.41	3150.6	4162.81	5087.4	5952.55	6783.98
499	-19.3652	-13.957	-9.86731	-3.04216	65.0403	434.016	1227.24	2115.62	3146.55	4162.32	5079.11	5944.31	6785.04
499.5	-19.2248	-15.1589	-9.73534	-1.9501	65.5021	436.9	1230.2	2116.37	3151.38	4162.19	5075.42	5945.65	6791
500	-18.2082	-14.1534	-11.1667	-3.95978	65.8717	437.325	1225.75	2114.99	3159.56	4164.95	5074.98	5951.12	6794.08
500.5	-18.5672	-14.7525	-9.55356	-3.0319	67.7727	439.378	1228.37	2120.63	3161.56	4160.19	5071.37	5949.64	6792.41
501	-18.5804	-15.4223	-8.65365	-1.13057	69.4838	437.253	1231.56	2121.27	3161.11	4162.62	5066.66	5946.41	6785.82
501.5	-18.4761	-15.0318	-7.71982	-1.30971	69.3823	433.292	1230.9	2124.74	3160.46	4163.4	5064.35	5948.98	6779.85
502	-19.0304	-13.955	-7.01978	-1.93429	71.3267	430.333	1228.69	2127.18	3160.26	4164.39	5061.06	5956.45	6787.29
502.5	-19.3253	-14.0315	-7.02214	-1.75481	71.6402	428.7	1231.95	2127.33	3164.95	4172.88	5058.38	5959.81	6796.86
503	-18.8433	-14.9987	-7.6852	-1.2679	68.6338	429.974	1236.92	2130.23	3171.31	4173.6	5057.19	5958.14	6797.3
503.5	-21.542	-14.3646	-8.11711	-2.4198	64.9596	432.69	1238.96	2132.02	3176.58	4169.13	5063.33	5960.18	6793.59
504	-17.6523	-12.5281	-9.08078	-1.84981	64.7031	433.388	1238.47	2128.77	3178.57	4161.68	5076.09	5970.85	6782.71
504.5	-16.5875	-11.4984	-8.81279	-3.82508	63.9746	429.575	1241.53	2126.14	3183.57	4167.03	5082.36	5972.12	6781.76
505	-18.3781	-13.246	-8.53073	-4.30322	63.2928	426.538	1239.8	2124.17	3181.54	4166.11	5072.07	5973.02	6784.64
505.5	-18.7376	-13.4563	-9.41971	-2.50371	63.2269	426.862	1239.01	2125.65	3180.58	4157.38	5071.99	5983.82	6783.4
506	-17.6486	-12.1187	-8.87103	-1.54922	61.9483	431.289	1239.98	2122.45	3178.75	4154.02	5076.42	5995.09	6776.85
506.5	-17.7474	-14.1232	-8.34515	-2.31727	62.1986	429.475	1243.45	2118.45	3174.26	4154.09	5071.73	5988.38	6775.75
507	-17.9698	-15.3853	-8.08149	-3.00925	62.2121	428.975	1246	2114.4	3169.42	4161.39	5066.32	5980.97	6776.84
507.5	-18.2785	-14.2501	-9.55684	-3.39354	64.0691	433.051	1245.31	2117.43	3167.61	4168.04	5063.16	5975.65	6784.73
508	-18.4795	-13.9861	-8.72346	-3.30552	64.5212	437.563	1237.04	2119.27	3170.16	4170.04	5066.6	5969.96	6791.74
508.5	-18.7083	-13.4337	-8.27008	-3.4522	63.8648	442.609	1237.64	2118.89	3171	4165.64	5074.59	5971.03	6786.7
509	-17.7995	-13.5304	-8.83179	-4.11787	61.7892	443.254	1245.37	2114.64	3169.67	4171.76	5084.43	5962.4	6784.02
509.5	-17.2632	-14.899	-9.76717	-5.2302	61.3546	438.625	1246.73	2113.34	3166.46	4176.78	5090.08	5941.62	6781
510	-17.1214	-14.5665	-9.6705	-4.90991	63.845	436.625	1244.93	2118.52	3165.05	4185.27	5086.87	5932.3	6789.75
510.5	-18.4285	-14.662	-9.5972	-4.06789	64.6153	437.822	1239.75	2124.76	3171.74	4182.52	5087.6	5928.61	6800.92
511	-16.9093	-14.2356	-10.9885	-5.04845	64.8097	440.483	1237.05	2130.58	3168.27	4176.74	5088.3	5927.93	6811.06
511.5	-17.5205	-14.3288	-9.08381	-3.90353	66.9762	442.433	1237.73	2126.64	3157.43	4173.41	5081.17	5926.62	6803.67
512	-16.9703	-13.1996	-9.4638	-3.3939	68.0973	445.307	1237.39	2124.96	3153.04	4172.8	5079.91	5938.21	6797.42
512.5	-17.1177	-15.7992	-9.35038	-3.40573	68.1504	447.799	1235.28	2126.95	3149.89	4178.39	5077.27	5946.06	6812.98
513	-17.2098	-16.3712	-9.12619	-2.26494	67.3275	451.544	1239.8	2123.88	3144.93	4173.67	5067.39	5947.47	6817.39
513.5	-18.1615	-15.2	-9.18045	-3.80059	68.1729	451.893	1245.52	2121.93	3141.44	4165.54	5057.29	5945.68	6812.39
514	-18.589	-14.9291	-10.3512	-5.76153	70.7654	448.168	1247.97	2118.87	3134.78	4164.62	5059.79	5938.05	6812.65
514.5	-17.3067	-15.186	-9.2405	-3.75342	72.4543	449.834	1252.17	2118.5	3132.75	4165.54	5060.75	5935.9	6808.6
515	-17.5642	-16.06	-8.68083	-3.82395	75.4161	449.556	1255.79	2116.44	3132.33	4167.62	5052.6	5936.74	6798.03
515.5	-18.4371	-13.9957	-9.51639	-4.837	75.6988	447.005	1256.31	2117.35	3132.41	4168.91	5052.18	5942.99	6787.33
516	-20.2485	-13.8013	-8.73604	-3.35202	75.5869	445.004	1252.09	2124.41	3134.98	4170.26	5055.24	5949.19	6798.25
516.5	-20.0402	-14.8417	-7.37028	-4.05718	72.8964	451.742	1256.24	2122.47	3125.81	4170.38	5054.46	5942.8	6812.12
517	-19.9638	-14.7881	-8.70492	-3.07289	72.0878	454.065	1259.33	2120.51	3117.28	4174.69	5043.24	5938.39	6819.09
517.5	-19.1811	-14.167	-8.78002	-2.49415	72.29	455.888	1252.17	2118.43	3112.56	4177.41	5038.7	5924.12	6818.73
518	-18.3899	-13.7397	-7.9217	-4.92557	72.3579	452.998	1248.74	2114.48	3111	4176.83	5040.56	5915.95	6811.37
518.5	-19.2292	-13.6426	-8.88329	-4.77304	71.8466	451.608	1249.59	2118.71	3115.94	4184.38	5042.54	5913.1	6797.63
519	-19.0927	-13.4706	-8.47326	-3.25612	72.7035	452.65	1247.77	2121.24	3113.2	4190.18	5041.01	5917.24	6780.19
519.5	-18.4527	-14.1288	-7.14177	-3.83938	71.6278	453.138	1250.02	2119.71	3105.26	4188.66	5048.13	5926.35	6783.72
520	-19.5505	-13.4117	-8.39009	-2.96316	68.5842	452.527	1254.37	2114.3	3109	4176.2	5048.69	5933.74	6798.63
520.5	-19.1602	-13.8846	-8.81496	-3.5264	66.2766	450.964	1255.53	2113.54	3124.44	4167.25	5043.15	5937.91	6802.51
521	-18.5215	-13.5885	-9.10099	-3.96604	66.427	451.264	1255.45	2111.65	3131.87	4174.99	5038.29	5936.99	6791.15
521.5	-19.352	-15.726	-7.9015	-4.70674	66.1129	450.653	1255.75	2110.01	3138.43	4176.14	5041.29	5938.17	6784.19
522	-19.3263	-13.6716	-7.68104	-3.80228	65.1535	451.682	1256.04	2115.83	3134.87	4180.84	5040.92	5934.96	6777.82
522.5	-19.6338	-13.133	-8.09819	-3.5026	65.8567	451.837	1260.72	2115.56	3133.53	4185.91	5042.75	5924.8	6776.26
523	-17.4691	-12.5913	-7.98925	-4.28697	65.9113	447.488	1261.78	2113.05	3132.41	4182.21	5048.23	5919.98	6774.94
523.5	-17.8911	-12.5508	-7.79697	-4.5538	66.2423	444.815	1255.93	2109.04	3129.54	4183.12	5049.88	5924.07	6774.69
524	-17.9794	-12.9341	-7.62244	-5.41439	65.366	442.409	1252.91	2104.3	3134.19	4181.93	5050.97	5926.86	6775.36
524.5	-18.3024	-11.892	-7.90541	-5.07146	63.8523	441.711	1248.92	2110.61	3140.48	4176.99	5058.16	5932.3	6767.25
525	-17.3613	-13.7038	-9.49961	-3.54048	63.2689	441.819	1254.66	2115.65	3141.46	4174.99	5059.82	5934.83	6764.43
525.5	-17.2518	-14.3201	-7.66872	-6.39216	63.0195	442.977	1263.49	2123.32	3143.97	4177.65	5058.37	5924.7	6760.37
526	-16.943	-13.3512	-7.51059	-5.36973	62.112	441.223	1266.93	2129.98	3145.8	4179.35	5061.09	5908.99	6762.67
526.5	-17.8637	-13.7091	-9.32903	-4.50681	60.5959	440.692	1264.04	2133.76	3147.39	4183.76	5059.91	5901.49	6754.69
527	-17.4204	-13.3749	-9.24757	-5.28945	63.2955	442.517	1259.42	2132	3152.91	4187.42	5056.12	5901.55	6743.84
527.5	-18.3992	-13.912	-8.9503	-5.3899	63.4925	441.099	1259.17	2132.94	3148.8	4185.14	5050.44	5915.81	6740.72
528	-18.8539	-12.7314	-9.22741	-5.56562	64.4117	441.726	1261.47	2139.32	3155.65	4179.79	5045.52	5925.48	6737.96
528.5	-17.0259	-14.7117	-9.68908	-5.95074	65.1303	440.501	1264.64	2145.33	3165.31	4169.65	5043.35	5921.9	6743.36
529	-17.2644	-15.0456	-11.2855	-5.41867	65.0936	440.34	1262.69	2149.72	3155.66	4163.25	5042.19	5923.54	6752.21
529.5	-19.5496	-15.2623	-9.46044	-5.80037	66.1639	443.554	1259.5	2150.84	3143.38	4160.69	5026.3	5931.27	6760.5
530	-18.4879	-14.3741	-8.2595	-5.76178	68.6583	447.894	1252.55	2147.09	3132.97	4158.92	5023.3	5935.36	6765.4
530.5	-18.5835	-13.6432	-8.83537	-5.44397	69.3177	446.095	1245.26	2146.16	3128.09	4159.33	5033.32	5935.25	6761.86
531	-18.4044	-13.7193	-11.1263	-4.32	66.8936	444.842	1248.52	2137.26	3129.88	4153.21	5031.44	5923.5	6771.92
531.5	-17.7248	-15.0623	-8.65634	-3.93787	66.073	448.583	1245.5	2130.02	3129.3	4144.63	5030.88	5917.99	6784.46
532	-18.8845	-14.8433	-8.24446	-4.69725	65.3558	451.653	1238.52	2123.43	3132.32	4135.61	5036.07	5913.79	6773.65
532.5	-19.5047	-15.4323	-10.5	-3.78501	68.0418	453.678	1234.48	2113.23	3135.54	4124.82	5044.77	5915.19	6766.68
533	-19.4488	-14.5899	-8.31358	-2.76587	67.1494	454.346	1232.64	2113.58	3136.73	4123.37	5041.67	5911.39	6765.01
533.5	-19.9711	-14.9471	-8.13568	-3.60937	63.5514	451.352	1234.43	2120.84	3128.74	4119.99	5039.88	5904.88	6766.88
534	-18.9646	-13.1043	-9.00074	-4.27015	62.5596	454.628	1236.72	2132.13	3128.09	4116.34	5036.75	5908.26	6778.29
534.5	-19.098	-13.4329	-9.24522	-4.2831	61.8993	458	1242.28	2139.43	3132.12	4122.72	5044.22	5920.7	6775.2
535	-19.0138	-13.8539	-8.90688	-4.12905	62.5839	461.873	1246.77	2140.82	3132.89	4122.13	5043.66	5932.45	6769.6
535.5	-17.3246	-13.8691	-8.33365	-3.2727	62.4158	465.259	1247.44	2134.5	3128.57	4116.98	5033.73	5939.63	6772.83
536	-18.8116	-14.3067	-9.12705	-4.09736	64.479	463.455	1251.44	2126.6	3131.94	4118.07	5030.26	5929.02	6774.43
536.5	-19.3838	-15.1458	-8.3294	-4.27346	64.517	461.263	1254.88	2132.5	3137.92	4115.41	5028.83	5923.32	6784.2
537	-18.4859	-14.9753	-7.7524	-1.9718	64.7277	461.49	1256.05	2132.2	3142.45	4110.25	5025.9	5923.99	6794.24
537.5	-17.6841	-13.2588	-8.648	-2.30572	66.4033	466.095	1252.79	2134.48	3143.69	4100.68	5014.39	5935.51	6793.28
538	-18.5105	-13.6272	-7.59562	-2.87069	67.3795	466.802	1247.46	2134.42	3144.58	4100.35	5016.19	5929.03	6795.33
538.5	-18.4965	-13.2263	-7.98356	-3.78111	68.3548	463.892	1250.73	2133.09	3143.77	4105.65	5023.79	5918.39	6790.37
539	-17.7216	-13.6202	-8.71944	-4.75658	67.8567	461.752	1247.61	2133.6	3135.63	4111.89	5033.21	5916.57	6800.67
539.5	-17.3103	-14.6711	-8.3039	-3.81771	69.0228	456.006	1244.92	2134.55	3123.44	4124.08	5043.65	5927.61	6812.87
540	-18.1292	-14.2508	-7.32824	-3.10438	70.106	451.879	1245.25	2130.15	3119.44	4128.02	5042.15	5925.76	6823.42
540.5	-17.5291	-14.2749	-7.36515	-3.32575	67.566	450.877	1244.02	2130.79	3119.15	4115.84	5048.9	5928.85	6820.17
541	-17.2956	-13.7207	-8.64389	-3.85439	67.3462	452.359	1245.46	2131.34	3119.37	4106.25	5059.1	5929.65	6813.92
541.5	-17.5991	-12.74	-9.01976	-2.46586	70.3795	456.003	1252.9	2143.26	3118.7	4106.62	5066.54	5924.6	6809.61
542	-17.7626	-12.4289	-10.7876	-2.75268	71.6229	458.011	1254.01	2149.25	3124.25	4113.22	5069.81	5919.83	6803.37
542.5	-17.5852	-13.8278	-9.19093	-4.22078	71.5401	459.278	1252.5	2143.56	3127.67	4120.92	5070.99	5911.38	6798.44
543	-17.7555	-13.7087	-8.67118	-3.83682	71.1148	462.001	1252.7	2144.74	3129.24	4125.41	5066.06	5901.12	6799.62
543.5	-17.208	-13.4043	-9.60672	-1.88817	71.0286	463.313	1249.72	2140.36	3125.22	4128.76	5056.91	5903.47	6801.03
544	-17.1436	-13.9652	-9.6212	-0.603712	71.4629	465.324	1247.33	2139.46	3133.1	4122.97	5044.16	5902.03	6803.88
544.5	-17.7746	-14.1511	-9.67295	-1.93361	72.5191	464.35	1244.53	2143.23	3137.49	4121.51	5045.53	5908.97	6809.79
545	-16.4088	-15.0584	-8.25151	-1.26628	69.9224	458.966	1237.98	2143.15	3138.84	4121.61	5055.4	5911.35	6816.84
545.5	-18.0704	-14.7741	-9.06555	-0.717449	71.9211	452.808	1233.37	2139.41	3136.07	4117.13	5067.12	5916.5	6824.62
546	-17.7417	-14.3831	-9.59803	-1.41395	71.7382	452.619	1239.08	2142	3130.13	4117.02	5073.84	5911.04	6829.53
546.5	-17.7045	-14.525	-9.40118	-1.54561	73.0233	450.638	1244.65	2145.04	3133.2	4109.9	5065.88	5907.31	6838.6
547	-18.7862	-15.7961	-9.79498	-1.26649	72.9936	448.363	1244.96	2149.14	3144.78	4102.49	5074.42	5909.77	6839.54
547.5	-18.5132	-15.7348	-10.6902	-2.49969	73.6075	448.338	1244.27	2147.72	3154.79	4104.1	5083.85	5912.63	6831.88
548	-19.6504	-12.7272	-9.60336	-2.49941	74.5341	448.166	1245.05	2135.83	3156.45	4103.46	5083.81	5909.76	6834.8
548.5	-18.1882	-15.1583	-9.27583	-2.70665	75.3438	445.678	1242.82	2129.51	3152.77	4103.45	5083.57	5903.99	6847.51
549	-18.5788	-16.5606	-8.77349	-1.90021	71.7418	448.397	1240.23	2124.4	3153.15	4107.35	5088.03	5901.9	6848.14
549.5	-19.9888	-15.6406	-8.69814	-1.98222	71.5991	447.181	1241.22	2125.23	3156.21	4111	5088.01	5895.56	6845.92
550	-19.1021	-14.6563	-9.04231	-3.04133	70.6696	444.11	1241.2	2125.35	3159.36	4112.83	5077.65	5904.33	6841.92
550.5	-19.9003	-14.6062	-9.86582	-1.57679	71.6214	443.451	1234.69	2123.14	3157.91	4117.52	5077.44	5920.8	6840.89
551	-18.5934	-14.0591	-10.2516	-1.15432	71.508	446.035	1234.28	2120.08	3148.3	4121.69	5076.13	5925.79	6842.65
551.5	-16.5217	-15.6814	-9.91719	-0.0732566	70.2005	446.954	1239.6	2121.33	3147.13	4122.32	5076.98	5929.73	6841.22
552	-16.2978	-14.8297	-10.3417	-0.557168	71.9175	447.175	1241.66	2124.46	3143.87	4112.79	5073.41	5935	6846.16
552.5	-18.0665	-14.8828	-9.55856	-0.536252	72.1277	445.467	1244.1	2117.93	3145.39	4107.2	5072.83	5929.24	6850.06
553	-18.3887	-16.3567	-8.91491	0.583011	70.3714	445.673	1246.3	2119.23	3146.44	4102.59	5066.97	5918.14	6855.28
553.5	-16.7517	-14.6392	-9.58467	-0.699783	67.9588	443.723	1250.6	2124.48	3145.24	4099.14	5065.86	5916.48	6856
554	-17.5872	-14.4471	-8.7454	-0.385964	64.943	442.767	1242.91	2131.08	3146.33	4094.67	5074.27	5907.66	6856.77
554.5	-18.6172	-15.4748	-7.59692	-0.692331	65.1206	447.849	1244.51	2136.96	3149.99	4091.68	5078.94	5911.48	6855.32
555	-17.3058	-14.0821	-8.49362	-0.842152	66.4149	450.352	1242.74	2146.99	3155.67	4091.07	5076.43	5919.43	6842.97
555.5	-17.6269	-15.1873	-9.34403	-1.32768	64.1036	450.132	1236.77	2149.68	3155.41	4089.25	5078.29	5914.39	6832.2
556	-18.7722	-14.1204	-9.0657	-0.743079	64.1623	448.058	1234.04	2150.3	3161.6	4080.79	5079.29	5902.05	6826.15
556.5	-17.4615	-14.197	-8.9199	-0.715386	62.8727	448.665	1235.11	2147.92	3167.95	4073.56	5067.88	5896.4	6834.99
557	-17.2183	-15.4389	-7.81677	-0.945055	62.7543	444.694	1244.65	2143.01	3163.1	4078.23	5051.78	5896.62	6836.87
557.5	-16.6886	-14.9807	-7.81431	-2.056	62.9736	447.63	1245.69	2137.34	3149.91	4075.19	5061.76	5898.58	6829.06
558	-17.5923	-14.2927	-8.98351	-2.87036	63.6102	450.129	1239.37	2136.35	3145.1	4071.33	5071.26	5908.14	6819.26
558.5	-18.148	-14.7908	-8.58026	-2.01809	62.8155	449.297	1233.53	2141.73	3149.5	4075.48	5070.1	5915.25	6818.47
559	-19.3212	-14.9611	-8.27947	-0.521556	63.7888	450.445	1233.73	2148.56	3154.67	4080.89	5070.51	5919.27	6818.68
559.5	-17.6132	-13.2465	-8.18824	0.30433	63.0528	448.438	1236.78	2146.03	3157.74	4080.44	5060.32	5914.57	6812.75
560	-16.3375	-14.3675	-7.7253	-1.33128	63.0323	447.122	1237.43	2140.88	3160.55	4081.49	5049.53	5921.2	6803.07
560.5	-16.0719	-14.3249	-9.53149	-3.42964	63.8505	447.555	1235.27	2138.58	3160.98	4090.95	5042.58	5928.46	6784.96
561	-16.0146	-15.1659	-10.5042	-3.27615	63.7549	449.579	1227.28	2131.25	3157.08	4101.96	5042.36	5918.53	6779.33
561.5	-17.1628	-14.8541	-8.96751	-3.23016	65.2194	452.539	1233.8	2125.58	3155.92	4105.44	5047.19	5904.94	6782.08
562	-16.9997	-15.2806	-9.12537	-3.63173	63.3639	458.763	1235.4	2120.42	3151.45	4102.13	5039.99	5917.67	6787.93
562.5	-17.2272	-16.1218	-8.63218	-3.69083	61.6602	467.111	1236.53	2118.48	3152.34	4102.17	5036.11	5924.66	6788.68
563	-17.6153	-17.0246	-8.37021	-5.00625	63.032	468.002	1238.84	2118.98	3154.28	4107.75	5035.35	5927.19	6793
563.5	-18.2925	-17.0391	-8.94315	-4.16597	65.0881	467.399	1238.78	2122.02	3155.89	4110.32	5034.8	5929.28	6791.64
564	-17.5518	-16.9574	-9.68538	-2.83704	65.1029	467.171	1241.62	2120.91	3161.45	4109.23	5035.73	5925.91	6789.57
564.5	-17.7469	-17.4604	-10.1491	-3.76745	63.4478	467.127	1247.33	2131.58	3167.41	4103.58	5044.52	5921.03	6791.84
565	-17.3079	-16.0067	-8.55969	-2.53518	64.1294	469.339	1251.52	2143.83	3168.94	4107.57	5050.99	5917.86	6804.05
565.5	-17.6958	-17.3064	-8.08785	-1.87879	63.8653	469.332	1253.82	2149.27	3165.3	4104.72	5051.44	5916.01	6804.82
566	-17.6745	-15.8932	-9.14737	-2.21987	61.6188	471.048	1254.77	2154.55	3165.96	4096.68	5058.57	5916.1	6791.3
566.5	-17.6362	-15.3854	-7.34755	-3.86483	61.9976	472.637	1253.02	2154.97	3174.05	4103.59	5062.42	5914.32	6790.36
567	-18.594	-15.3484	-8.3792	-3.49654	62.8573	472.834	1249.51	2150.07	3180.64	4108.49	5068.18	5901.42	6796.24
567.5	-19.031	-16.5814	-8.78266	-3.32413	62.2354	470.332	1246.91	2148.21	3186.55	4105.62	5070.81	5899.08	6797.11
568	-19.3885	-15.9862	-9.50682	-2.44371	60.8546	467.767	1247.65	2151.15	3192.82	4106.46	5068.16	5902.74	6801.77
568.5	-19.1761	-14.1268	-8.60581	-1.95793	61.439	466.95	1244.58	2151.2	3198.09	4112.57	5069.1	5909.21	6799.51
569	-20.4176	-13.2465	-7.62316	-2.85179	63.4961	466.042	1249.05	2156.82	3199.1	4115.54	5066.31	5911.73	6797.49
569.5	-19.8499	-13.8502	-6.64329	-4.38449	63.7065	469.572	1254.82	2162.32	3192.62	4117.11	5057.29	5916.59	6806.54
570	-19.4042	-14.558	-8.59292	-3.19742	63.1174	469.953	1252.3	2157.65	3182.09	4111.1	5059.89	5924.16	6812.51
570.5	-19.4345	-14.9975	-7.6844	-2.71462	62.0061	467.883	1251.23	2151.5	3178.1	4102.28	5058.63	5931.81	6823.34
571	-20.2749	-15.0936	-7.31257	-1.07985	62.5914	469.04	1248.1	2152.29	3172.22	4095.56	5050.98	5922.55	6825.5
571.5	-18.7646	-14.1168	-8.80266	-2.38999	61.1665	469.987	1247.36	2155.64	3169.38	4102.09	5048.03	5908.71	6817.71
572	-17.2062	-15.111	-10.8592	-2.86064	60.7191	469.161	1251.47	2152.66	3165.17	4099.82	5051.39	5905.57	6811.01
572.5	-17.8361	-14.3291	-7.89428	-2.90669	59.0385	468.237	1252.33	2150.49	3156.61	4100.71	5055.91	5894.01	6823.65
573	-19.2545	-14.6635	-7.63317	-1.885	58.9828	470.872	1254	2154.81	3147.12	4102.15	5051.55	5892.73	6826.8
573.5	-17.9763	-14.7384	-8.06196	-3.28903	58.682	470.55	1257.69	2160.34	3140.46	4091.66	5059.16	5900.14	6829.83
574	-18.3289	-14.8472	-8.79723	-4.48449	58.7273	468.474	1256.65	2159.92	3149.57	4081.8	5071.84	5913.8	6837.58
574.5	-16.6822	-13.2847	-8.67164	-3.25094	60.5488	464.784	1258.3	2158.89	3162.34	4089.24	5067.58	5919.32	6843.26
575	-17.206	-13.3772	-9.68372	-4.7318	59.7206	460.95	1262.23	2155.61	3165.01	4098.17	5064.7	5929.12	6851.24
575.5	-16.4202	-14.2547	-9.26741	-5.48695	58.9251	458.844	1271.84	2156.89	3163.2	4098.1	5059.13	5938.44	6854.2
576	-15.7454	-15.5304	-9.51803	-5.19664	60.2787	459.727	1275.04	2158.54	3163.3	4096.77	5062.92	5937.52	6848.71
576.5	-17.1303	-14.7993	-10.6183	-6.71637	61.1165	459.211	1270.41	2152.86	3163.16	4097.52	5071.09	5943.75	6838.66
577	-16.4338	-13.8345	-9.96532	-5.64543	58.9357	459.879	1268.25	2144.85	3170.42	4093.84	5066.44	5949.58	6837.24
577.5	-15.994	-14.5229	-10.2474	-4.08097	57.9621	463.344	1273.08	2143.32	3171.37	4083.28	5063.7	5947.46	6842.67
578	-17.7913	-14.7054	-10.3069	-4.21287	57.6399	468.466	1273.45	2136.19	3171.5	4083.34	5061.52	5942.66	6833.76
578.5	-17.4632	-15.5967	-9.17134	-4.50184	60.2871	470.638	1265.59	2128.43	3166.43	4078.75	5061.7	5941.57	6834.86
579	-18.3629	-16.0427	-8.05609	-4.05215	62.5648	470.985	1264.54	2125.27	3161.71	4078.33	5070.68	5938.47	6841.47
579.5	-17.4224	-14.7813	-8.23978	-5.92237	60.5125	471.068	1264.53	2122.11	3151.62	4085.92	5074.26	5937.69	6841.8
580	-15.7583	-14.5448	-7.58553	-4.89477	60.9038	472.632	1260.6	2129.16	3159.34	4090.03	5072.75	5942.63	6842.38
580.5	-16.7855	-15.6941	-8.69182	-4.30174	61.7455	468.548	1257.52	2136.2	3172.46	4096.59	5078.02	5944.13	6838.93
581	-18.2043	-14.6088	-9.27701	-4.51286	61.6345	463.053	1258.67	2138.86	3174.08	4103.65	5086.26	5947.64	6840.83
581.5	-17.2524	-15.181	-8.99979	-4.98114	61.0731	464.836	1258.48	2135.47	3171.74	4106.1	5073.89	5956.92	6847.62
582	-17.3784	-16.7846	-8.80937	-2.58762	58.9257	469.3	1259.41	2128.43	3165.68	4108.62	5064.75	5956.59	6852.58
582.5	-18.7428	-14.3588	-7.72589	-3.26827	59.1992	468.452	1257.24	2128.07	3152.18	4103.37	5072.17	5959.59	6852.14
583	-18.4272	-13.4692	-7.96536	-3.66178	62.2471	464.406	1253.22	2118.53	3134.57	4102.4	5071.81	5954.66	6841.11
583.5	-18.4446	-15.0869	-7.87005	-1.71009	63.825	464.567	1246.59	2110.35	3128.97	4100.46	5073.61	5942.11	6821.45
584	-18.7169	-16.325	-8.10826	-1.48242	63.7779	467.315	1246.17	2111.91	3125.8	4098.2	5080.26	5935.3	6812.59
584.5	-17.5469	-14.4445	-8.38218	-2.3027	62.2801	468.185	1246.71	2108.53	3130.66	4103.81	5093.94	5938.99	6822.23
585	-18.7173	-14.3528	-8.11162	-2.78679	61.614	470.468	1244.77	2106.54	3134.23	4118.02	5098.45	5931.7	6828.95
585.5	-18.4225	-14.8938	-8.49095	-2.98662	63.9559	471.223	1242.54	2109.62	3139.09	4119.93	5099.44	5928.99	6825.8
586	-18.228	-13.6484	-8.43267	-1.35036	64.0601	471.533	1250.95	2113.84	3143.85	4123.01	5091.24	5931.25	6825.41
586.5	-18.8911	-14.6079	-8.53558	-1.81336	65.0363	470.353	1259.83	2112.73	3152.89	4126.14	5081.71	5940.61	6826.29
587	-18.6556	-13.937	-7.73391	-2.41715	63.9466	466.504	1262.81	2114.41	3160.76	4121.76	5071.8	5949.97	6823.99
587.5	-18.8982	-14.4283	-7.73075	-1.60456	65.5264	467.582	1267.02	2111.26	3159.47	4114.54	5078.76	5955.75	6836.95
588	-18.0819	-13.5424	-9.41904	-1.8326	63.6421	471.26	1265.03	2118.41	3157.52	4112.01	5090.53	5944.68	6859.75
588.5	-18.5037	-15.5899	-8.27579	-3.05311	63.7284	474.131	1260.86	2125.84	3165.31	4111.52	5091.11	5931.92	6861.7
589	-18.8207	-15.4408	-7.34213	-3.6101	63.7908	475.659	1259.73	2128.96	3181.46	4109.61	5080.39	5930	6864.99
589.5	-17.1528	-14.8901	-9.1172	-2.95986	64.2868	475.699	1264.2	2140.02	3189.69	4106.58	5075.33	5918.47	6867.88
590	-18.5427	-14.7409	-6.99912	-2.68042	64.0914	479.152	1265.85	2145.27	3194.47	4101.64	5075.88	5915.4	6853.4
590.5	-18.0072	-14.4455	-6.91831	-2.71944	64.8831	482.352	1256.98	2145.33	3191.02	4104.81	5077.86	5914.49	6843.87
591	-18.4489	-15.1715	-7.98916	-4.0705	65.7219	481.663	1251.61	2151.05	3187.11	4102.95	5080.69	5918.59	6844.35
591.5	-16.4368	-14.9637	-7.8631	-3.5261	64.8555	481.808	1253.6	2158.6	3174.78	4106.64	5077.17	5932.54	6840.35
592	-15.8844	-15.4516	-7.84253	-5.29279	65.6337	480.354	1260.18	2167.68	3165.8	4110.8	5075.69	5934.38	6835.65
592.5	-16.7287	-14.08	-9.09425	-5.97098	66.4085	482.233	1262.18	2174.6	3173.66	4118.31	5082.35	5934.56	6838.78
593	-17.4615	-14.4575	-9.60498	-3.3378	67.4483	482.117	1254.53	2181.25	3191.03	4105.82	5079.16	5938.44	6828.89
593.5	-17.0454	-13.3121	-7.90394	-5.15266	68.8805	479.879	1249.07	2176.9	3197.12	4099.5	5075.69	5938.81	6828.15
594	-15.6886	-14.655	-7.87438	-4.08885	68.8032	479.572	1251.58	2170.41	3198.56	4099.03	5074.1	5935.59	6829.05
594.5	-17.2093	-14.3277	-7.35536	-3.32552	70.0227	479.191	1249.51	2165.31	3203.77	4105.75	5071.74	5929.19	6833.8
595	-17.6142	-14.3118	-8.97345	-2.7607	67.4962	479.443	1253.57	2165.61	3197.01	4114.89	5066.23	5922.26	6838.59
595.5	-18.6679	-14.95	-9.25032	-3.39428	66.8702	479.979	1255.74	2163.1	3186.88	4120.1	5061.05	5918.96	6824.72
596	-17.957	-14.8542	-8.22934	-2.97847	66.5333	484.416	1258.8	2167.15	3177.25	4127.02	5064.37	5921.76	6814.08
596.5	-18.0298	-15.2352	-8.46646	-3.4112	64.2828	486.84	1257.76	2168.92	3174.69	4133.76	5066.71	5924.71	6822.99
597	-18.6549	-15.2201	-8.44314	-3.93797	64.5897	488.47	1257.43	2170.84	3173.48	4130.14	5070.71	5926.09	6830.22
597.5	-18.6988	-13.9902	-9.60749	-3.49454	65.0508	488.306	1253.51	2170.43	3169.95	4135.88	5064.59	5918.3	6827.76
598	-19.5852	-14.3721	-9.98432	-2.42046	64.8097	488.325	1250.64	2170.45	3169.73	4125.23	5062.93	5929.34	6827.28
598.5	-19.5606	-15.7897	-8.49901	-3.29414	63.0248	488.296	1250.33	2180.33	3169.69	4122.87	5070.33	5936.59	6820.49
599	-18.0297	-16.0932	-9.12562	-3.8	61.2469	486.189	1250.78	2183.46	3174.01	4125.26	5071.18	5923.63	6823.23
599.5	-19.3542	-16.5025	-8.78651	-2.84599	60.1846	483.135	1249.86	2174.36	3170.88	4124.61	5067.6	5906.57	6833.2
600	-18.7609	-15.8155	-8.5449	-1.75543	61.3993	481.406	1249.22	2171.72	3171.95	4122.21	5061.69	5904.94	6827.44
600.5	-18.578	-13.8775	-8.80692	-2.61816	64.7511	482.333	1250.3	2168.5	3180.45	4114.92	5057.19	5904.99	6819.41
601	-19.9843	-13.7874	-8.77762	-5.11029	63.9398	482.204	1247.83	2171.48	3191.31	4109.19	5052.55	5903.64	6819.72
601.5	-20.7245	-16.7566	-7.13287	-2.71565	64.8627	482.336	1241.25	2167.71	3195.93	4106.37	5049.64	5912.36	6830.13
602	-18.646	-14.875	-7.26374	-2.66085	65.3287	479.959	1238.12	2166.25	3195.08	4106.86	5049.09	5923.52	6844.69
602.5	-17.4228	-13.6575	-7.09954	-2.94063	64.6006	476.155	1239.44	2161.87	3189.6	4112.77	5054.69	5924.04	6838.38
603	-18.9036	-15.8569	-8.09596	-1.29692	66.8788	474.489	1237.97	2165.8	3179.46	4112.73	5057.79	5911.59	6832.79
603.5	-18.968	-14.5969	-8.37971	-1.87086	67.2321	475.604	1239.89	2169.09	3185.94	4111.17	5059.17	5907.74	6837.1
604	-18.6171	-14.8659	-9.1793	-2.65984	66.9238	474.287	1243.39	2169	3191.22	4116.8	5070.58	5911.31	6836.31
604.5	-19.6011	-15.0444	-8.81917	-1.7785	67.7933	473.549	1243.69	2167	3186.45	4118.9	5079.36	5910.97	6843.46
605	-19.5028	-14.7383	-8.4229	-1.67065	70.6358	469.055	1240.6	2163.73	3175.93	4120.38	5075.54	5911.88	6848.22
605.5	-19.3321	-15.0668	-6.63376	-2.39817	72.9236	467.586	1238.02	2166.85	3164.13	4117.9	5078.96	5912.55	6865.25
606	-18.6511	-13.8663	-8.51956	-2.88797	73.9443	468.58	1236.09	2168.39	3164.03	4114.74	5082.41	5916.75	6871.46
606.5	-17.7389	-14.2177	-8.14642	-2.42231	71.7071	468.003	1235.29	2169.24	3161.18	4119	5074.77	5927.43	6863.81
607	-16.6829	-15.5044	-7.11231	-2.93708	70.2661	467.132	1242.93	2170.14	3158.77	4124.56	5079	5931.77	6857.94
607.5	-16.2899	-14.8305	-8.08043	-3.93028	70.0325	467.821	1245.93	2172.26	3155.84	4128.29	5085.6	5931.33	6861.58
608	-16.938	-15.228	-8.93179	-3.13108	69.418	465.216	1243.95	2167.59	3158.16	4129.22	5087.29	5935.24	6859.32
608.5	-18.3476	-13.8717	-9.07049	-2.98741	70.096	466.193	1240.18	2167.28	3148.87	4134.65	5093.88	5938.79	6857.05
609	-18.4182	-13.8168	-10.242	-2.13943	70.36	471.735	1236.24	2165.11	3143.4	4129.55	5097.91	5943.55	6841.34
609.5	-17.4	-12.3311	-9.4047	-2.37921	70.0399	470.142	1233.43	2163.37	3147.16	4119.46	5104.06	5953.37	6843.43
610	-17.8475	-13.9624	-8.27515	-4.91848	68.078	466.685	1239.23	2154.28	3154.18	4110.4	5100.79	5949.36	6843.54
610.5	-18.1897	-13.7588	-8.41292	-4.12174	67.4513	465.557	1244.57	2145.52	3156.12	4111.94	5091.44	5954.84	6832.3
611	-18.6007	-14.2474	-9.76001	-3.35628	67.2713	463.863	1242.82	2157.51	3146.82	4117.73	5088.88	5953.71	6821.81
611.5	-17.877	-14.1324	-8.77074	-3.9961	69.9563	465.584	1237.76	2165.33	3144.39	4121.19	5090.6	5958.91	6820.95
612	-18.8266	-14.0485	-9.54248	-4.05794	71.1662	464.943	1234.84	2158.3	3145.35	4121.96	5094.24	5968.69	6813.77
612.5	-16.7307	-14.2263	-9.61357	-3.97654	70.3158	467.539	1233	2155.39	3151.92	4127.5	5093.36	5971.38	6807.58
613	-17.6186	-15.3633	-8.9918	-4.46811	71.2339	465.815	1241.02	2156.09	3166	4140.25	5089.13	5969.34	6809.1
613.5	-18.8593	-14.5547	-7.85861	-3.78234	70.2547	467.545	1248.18	2155.66	3171.56	4141.8	5086.4	5972.31	6804.78
614	-16.8392	-14.0998	-7.85397	-3.11833	71.3281	469.063	1250.78	2157.78	3169.77	4146.99	5088.3	5976.18	6808.49
614.5	-18.0915	-14.7393	-8.07383	-4.97014	69.8027	472.289	1251.59	2166.82	3166.59	4146.39	5082.56	5971.42	6810.59
615	-18.9281	-15.5368	-8.0479	-4.53224	69.4119	473.472	1251.17	2180.34	3163	4142.75	5078.02	5964.51	6808.81
615.5	-18.3347	-14.9402	-8.9853	-3.35313	70.7808	476.294	1246.64	2188.46	3157.98	4143.29	5074.14	5956.42	6811.76
616	-18.9207	-14.2968	-8.4686	-3.97253	70.0722	481.6	1243.31	2187.09	3163.35	4135.56	5068.97	5962.13	6819.8
616.5	-20.4704	-13.9504	-8.50693	-4.19012	70.3208	480.491	1240.02	2188.55	3164.17	4130.73	5070.58	5961.95	6822.56
617	-21.0969	-15.9418	-7.89642	-3.89332	69.5424	479.173	1240.47	2190.27	3162.86	4133.69	5069.58	5961.61	6826.83
617.5	-18.4771	-14.2262	-8.43368	-3.73802	68.8299	478.623	1244.51	2190.08	3162.43	4135.43	5067	5955.59	6825.46
618	-18.1396	-12.5156	-8.00871	-3.56332	70.6208	477.828	1244.51	2186.28	3163.05	4140.26	5064.63	5950.79	6829.88
618.5	-18.5197	-16.0317	-7.82455	-3.1551	72.1806	477.82	1246.96	2185.09	3171.17	4138.73	5066.27	5955.27	6845.77
619	-18.5934	-13.5454	-6.47214	-2.75529	72.2497	471.627	1247.54	2181.28	3177.65	4136.78	5071.91	5962.42	6850.75
619.5	-18.1934	-14.1002	-7.80478	-2.42993	73.2247	467.86	1244.96	2182.31	3182.07	4135.45	5069.42	5964.86	6835.85
620	-19.395	-14.1879	-8.55736	-1.58945	70.5628	464.892	1241.59	2181.01	3178.92	4132.82	5065.83	5969.46	6810.39
620.5	-17.8183	-13.9077	-7.15606	-3.04031	70.2293	468.903	1243.27	2177.32	3173.2	4141.21	5063.67	5966.42	6805.09
621	-17.441	-14.5215	-7.97743	-4.50895	68.4654	469.026	1246.64	2177.88	3169.5	4143.41	5070.17	5967.33	6803.28
621.5	-17.8909	-13.0874	-8.22133	-1.27608	67.6572	470.031	1245.1	2188.83	3174.29	4148.45	5077.13	5974.18	6801.63
622	-18.4722	-14.2505	-6.41457	-2.22853	67.801	471.929	1240.85	2192.93	3174.12	4156.86	5084.7	5971.49	6805.47
622.5	-17.9385	-14.3635	-6.48455	-2.72801	68.2416	477.353	1240.73	2190.16	3176.51	4162.72	5084.44	5966.74	6819.8
623	-17.8254	-13.9735	-8.33423	-2.78295	68.2526	478.428	1246.25	2182.57	3176.81	4155.22	5090.03	5969.46	6831.2
623.5	-16.7521	-14.1282	-8.21776	-2.81179	67.7886	479.691	1248.18	2165.75	3179.85	4150.43	5083.61	5967.55	6843.6
624	-18.7313	-14.3541	-7.76497	-2.82659	67.9006	477.609	1244.68	2159.78	3188.78	4141.82	5080.15	5961.77	6848.12
624.5	-16.6148	-14.4158	-8.37851	-2.58928	69.0544	476.189	1241.97	2152.9	3189.82	4134.96	5081.27	5954.82	6833.91
625	-17.728	-14.4963	-9.48684	-2.7282	66.796	476.707	1245.51	2149.77	3182.92	4129.45	5081.28	5955.03	6826.54
625.5	-19.2865	-14.0814	-8.91203	-2.22436	64.5444	476.983	1243.63	2150.58	3174.61	4137.84	5078.77	5963.09	6815.5
626	-18.4562	-14.5961	-8.75286	-2.37421	63.6318	475.105	1248.53	2153.6	3180.17	4142.18	5074.85	5961.17	6814.96
626.5	-17.9355	-14.6969	-9.31948	-1.23552	63.5676	471.944	1251.86	2152.42	3182.34	4142.46	5078.5	5958.92	6820.89
627	-18.0886	-14.6149	-9.72311	-1.02317	65.3836	474.708	1255.71	2146.93	3178.12	4138.62	5077.05	5961.14	6819.83
627.5	-17.6611	-14.3142	-9.36261	-1.37239	66.4784	475.729	1257.75	2139.25	3173.92	4133.11	5073.37	5962.09	6815.84
628	-16.8883	-14.5318	-8.08791	-2.49042	65.6805	475.811	1250.58	2141.36	3179.44	4134.1	5072.82	5954.7	6808.62
628.5	-18.1195	-14.516	-8.14809	-2.29729	66.8318	479.77	1246.23	2144.89	3187.07	4140.06	5080.67	5954.07	6794.41
629	-18.3851	-14.6514	-7.42242	-2.23254	69.7248	480.178	1250.2	2147.44	3193.55	4143.25	5081.45	5967.74	6799.83
629.5	-17.6102	-15.169	-7.52781	-2.6871	70.4343	481.696	1246.47	2152.18	3192.06	4152.3	5086.74	5959.22	6803.54
630	-17.6508	-15.9452	-7.78697	-2.58888	70.7533	484.706	1246.39	2154.84	3192.38	4157.07	5099.71	5945.09	6798.61
630.5	-18.3062	-14.6544	-7.99452	-1.77967	70.3072	483.465	1242.22	2156.57	3190.34	4156.02	5105.91	5949.39	6805.69
631	-17.8166	-14.4955	-8.08527	-2.35707	69.1196	483.751	1239.15	2155.37	3190.67	4151.95	5103.28	5950.92	6811.81
631.5	-16.9852	-17.1666	-9.35218	-1.8294	68.4715	484.784	1240.72	2150.76	3195.04	4143.27	5097.32	5944.37	6811.54
632	-18.3362	-15.7873	-9.10398	-1.20947	70.8461	483.454	1238.28	2153.15	3191.04	4141.96	5096.57	5945.25	6812.26
632.5	-19.3443	-15.9668	-8.55388	-1.68697	69.3174	475.288	1236.98	2154.27	3185.91	4143.95	5099.27	5948.72	6816.32
633	-18.4735	-16.106	-8.67224	0.092634	66.8291	474.549	1236.62	2161.07	3182.97	4141.7	5093.09	5952.9	6816.3
633.5	-17.7781	-16.7172	-8.1708	1.93384	65.7856	476.443	1239.11	2164.88	3183.65	4132.87	5094.27	5956.03	6813.71
634	-19.2344	-16.9458	-9.21856	1.16486	65.8654	479.158	1242.12	2162.17	3182.5	4130.07	5098.4	5955.92	6823.75
634.5	-19.057	-16.1711	-7.69742	-1.1648	66.4277	481.119	1237.84	2153.31	3179.62	4121.87	5100.98	5954.61	6835.75
635	-17.8385	-15.4039	-7.33861	-0.948171	66.4322	480.917	1237.1	2153.26	3173.19	4116.66	5101.87	5950.54	6849.13
635.5	-18.0698	-14.8472	-8.20466	0.667419	69.3538	478.255	1241.62	2162.12	3174.25	4120.69	5095.53	5951.8	6854.96
636	-20.1848	-14.4749	-7.97154	0.444367	73.3672	476.685	1245.87	2174.89	3174.46	4127.68	5087.63	5947.76	6849.96
636.5	-19.9446	-15.4082	-7.32751	-1.97872	71.5716	474.587	1246.36	2182.97	3170.47	4138.05	5094.75	5936.98	6835.88
637	-18.1056	-15.3308	-6.51952	0.0134962	69.0321	475.61	1247.27	2185.2	3168.53	4149.43	5107.41	5941.4	6836.03
637.5	-18.1069	-16.0461	-7.10954	-0.480045	67.3796	478.203	1247.4	2180.56	3176.57	4148.95	5114.63	5953.09	6834.87
638	-18.9811	-15.5516	-6.52277	-0.591445	69.4582	482.056	1242.46	2176.35	3180.51	4144.5	5122.97	5958.18	6826.53
638.5	-19.1723	-14.4386	-7.25744	-0.441563	71.0687	485.5	1237.84	2175.17	3187.48	4147.16	5121.17	5963.08	6817.32
639	-18.6086	-14.0457	-9.50066	0.92537	72.3255	486.315	1230.78	2175.14	3192.9	4147.12	5121.47	5973.8	6818.3
639.5	-17.6304	-13.9301	-8.31396	0.27422	71.5501	486.359	1233	2167.25	3182.29	4156.26	5112.57	5976.19	6823.25
640	-18.2285	-13.9158	-8.0598	-1.96995	70.0025	489.439	1234.68	2160.56	3178.49	4163.97	5114.03	5970.67	6829.3
640.5	-18.8995	-13.8163	-7.61984	-2.06913	70.5835	484.541	1231.83	2157.03	3181.22	4162.37	5113.94	5964.74	6840.02
641	-18.7464	-15.027	-8.72511	-1.2179	70.4802	484.769	1232.75	2158.11	3182.14	4161.24	5115.92	5965.03	6843.09
641.5	-18.4809	-14.6412	-8.5588	-2.61573	68.8507	489.516	1229.64	2171.34	3188.45	4169.57	5121.75	5972.35	6846.39
642	-17.7124	-13.3287	-8.76422	-2.21498	68.3218	490.682	1230.83	2178.18	3193.94	4172.98	5121.01	5974.86	6844.83
642.5	-17.506	-12.8646	-8.85242	-1.17201	69.3748	486.804	1236.24	2178.62	3186.62	4173.03	5115.28	5965.13	6821.84
643	-18.3142	-13.4171	-10.2542	-1.51988	72.5823	485.587	1232.09	2173.36	3175.25	4169.52	5114.76	5952.97	6805
643.5	-18.9959	-13.4087	-9.64504	-2.25887	74.074	486.336	1223.25	2173.76	3169.93	4160.83	5109.5	5945.18	6805.39
644	-18.5081	-14.7054	-9.1671	-2.05097	74.6037	484.852	1224.53	2179.85	3172.56	4154.26	5104.48	5936.94	6810.28
644.5	-18.3201	-13.9075	-9.58313	-1.00778	74.087	483.923	1229.5	2181.35	3172.02	4144.71	5106.77	5925.6	6815.42
645	-17.4834	-14.0249	-9.13679	-1.70668	72.4912	482.481	1230.69	2178.13	3174.58	4148.64	5116.6	5930.29	6823.24
645.5	-17.3661	-13.777	-9.27438	-2.43515	71.8408	480.451	1232.04	2175.27	3175.66	4156.67	5119.83	5939.66	6824.6
646	-18.3519	-14.8571	-9.81448	-1.76747	72.5307	482.353	1230.43	2171.67	3174.15	4155.43	5105.96	5939.2	6829
646.5	-18.503	-15.0065	-11.4995	0.585649	71.9991	482.971	1227.53	2173	3164.06	4153.48	5095.79	5945.63	6832.8
647	-19.193	-14.5345	-8.14637	1.0542	72.492	484.995	1223.84	2174.73	3155.12	4154.05	5102.11	5943.47	6819.44
647.5	-19.1209	-14.8107	-8.62378	-1.24596	71.9365	488.394	1227.3	2177.91	3156.99	4145.79	5105.44	5936.38	6821.89
648	-19.1183	-14.9351	-9.18878	-0.532732	70.1299	486.267	1231.16	2174.11	3160.19	4121.19	5113.07	5936.3	6830.09
648.5	-20.3568	-15.1603	-9.34074	-0.111197	69.7133	483.801	1229.16	2171.88	3158.72	4110.74	5118.76	5929.03	6815.23
649	-20.9887	-14.9315	-9.1883	0.127699	71.618	487.286	1225.83	2172.79	3159.53	4116.65	5118.12	5927.73	6813.6
649.5	-20.6754	-15.5028	-8.05023	0.574167	73.5289	488.136	1231.36	2171.43	3175.67	4123.02	5125.19	5927.74	6822.07
650	-20.2054	-14.9082	-9.14641	0.501551	74.5388	487.181	1232.6	2169.93	3192.22	4122.41	5135.01	5936.58	6826.36
650.5	-19.5293	-14.4401	-9.04233	-0.478109	74.6739	486.075	1237.22	2170.31	3194.46	4118.15	5133.5	5948.16	6827.93
651	-19.5134	-14.6684	-9.72556	-1.0135	74.3586	486.073	1232.97	2169.37	3196.41	4123.13	5140.28	5951.67	6832.54
651.5	-19.4773	-13.9837	-8.96556	0.16143	75.8677	481.837	1228.01	2167.96	3195.07	4131.6	5144.96	5940.53	6828.57
652	-19.3341	-12.866	-9.16417	0.600746	76.8433	479.665	1232.75	2169.31	3192.58	4132.15	5146.15	5939.48	6824.55
652.5	-19.8084	-13.8761	-9.50672	0.468545	77.3704	476.459	1229.92	2171.26	3198.52	4123.19	5137.55	5935.81	6823.65
653	-18.4764	-15.0991	-8.71865	-0.0289688	77.0249	477.078	1228.33	2171.77	3188.21	4121.53	5130.84	5926.38	6820.3
653.5	-21.1847	-13.356	-9.52523	-0.405509	76.6169	484.078	1228.55	2174.34	3179.96	4116.77	5126.41	5937.4	6820.85
654	-21.1893	-14.3398	-8.96518	-0.484829	76.443	489.134	1232.41	2174.45	3181.45	4118.02	5122.33	5947.01	6821.24
654.5	-19.2319	-15.569	-7.75876	0.181347	78.2616	494.358	1234.92	2176.26	3188.86	4114.4	5108.56	5947.58	6816.25
655	-19.7063	-14.4032	-8.70257	-1.71502	79.2286	495.453	1232.64	2176.82	3189.32	4115.96	5101.35	5945.5	6819.69
655.5	-19.1413	-13.2657	-7.69321	-1.80411	80.6094	496.193	1229.59	2177.72	3198.08	4119.84	5102.48	5948.8	6816.49
656	-17.5515	-14.1144	-8.3608	-0.819057	77.9882	494.116	1229.92	2180.29	3195.61	4126.67	5102.23	5955.46	6821.45
656.5	-17.8059	-14.2057	-7.70282	-1.99574	76.9289	494.816	1231.8	2168.66	3187.16	4127.66	5097.43	5962.44	6825.74
657	-18.119	-13.9366	-7.4412	-2.84082	76.8521	496.667	1232.87	2155.78	3195.32	4132.42	5099.99	5977.51	6817.25
657.5	-16.8498	-14.4695	-6.97374	-1.05788	78.049	500.014	1231.65	2155.49	3200.09	4138.47	5107.1	5979.26	6817.84
658	-18.9556	-13.1771	-8.36924	-2.28128	76.5883	502.587	1232.32	2168.9	3197.88	4144.19	5109.53	5973.67	6818.52
658.5	-17.7877	-13.5622	-9.03534	-2.72407	78.6309	502.374	1230.7	2176.7	3201.2	4133.34	5112.8	5966.38	6828.95
659	-17.3978	-13.5361	-9.39246	-3.40518	80.0392	506.822	1230.04	2172.28	3205.91	4129.42	5114.62	5967.05	6834.07
659.5	-18.3291	-13.577	-8.21476	-2.59626	76.7579	508.928	1225.04	2167.11	3206.34	4131.54	5111.36	5973.9	6838.98
660	-17.6955	-12.97	-8.83245	-3.9223	77.2503	510.467	1224.44	2165.37	3197.38	4135.37	5110.52	5985.7	6840.68
660.5	-18.2433	-14.0809	-9.41257	-3.17345	79.8034	509.373	1223.99	2167.72	3193.74	4143.27	5107.12	5993.94	6830.68
661	-18.0982	-14.3667	-10.5148	-2.05272	81.3149	506.056	1226.3	2168.15	3188.97	4148.21	5111.72	5990.29	6824.35
661.5	-18.7985	-13.8246	-9.4118	-3.37481	81.4031	503.618	1226.25	2168.53	3179.77	4148.66	5106.82	5989.09	6818.96
662	-19.6027	-13.4487	-8.99992	-4.3998	80.2801	502.102	1229.18	2169.57	3181.19	4153.91	5098.64	5990.81	6818.35
662.5	-19.7492	-14.9645	-8.72597	-3.09955	79.2331	501.228	1232.62	2172.77	3188.3	4160.15	5098.79	5988.96	6826.54
663	-17.4095	-14.387	-9.67564	-2.93607	79.0525	500.353	1231.11	2181.65	3189.7	4154.65	5103.87	5993.7	6833.34
663.5	-19.0635	-15.2314	-8.43598	-2.92434	80.4293	503.188	1233.49	2182.46	3176.3	4149.82	5102.88	5990.52	6841.69
664	-20.155	-14.9205	-7.77492	-2.0625	79.446	503.446	1233.31	2178.7	3172.34	4148.34	5107.78	5978.53	6843.2
664.5	-19.7214	-14.4686	-8.55262	-2.78655	78.313	503.77	1229.82	2174.05	3171.58	4146.12	5110.76	5981.11	6834.86
665	-19.0936	-15.4685	-7.55821	-4.06422	78.7783	499.51	1226.28	2178.96	3168.47	4141.87	5106.91	5981.09	6828.94
665.5	-20.1328	-15.3869	-8.52447	-1.74415	78.3823	500.012	1228.22	2187.57	3170.52	4135.54	5112.76	5969.27	6832.73
666	-20.1976	-14.9229	-7.8802	-0.842719	78.9281	501.251	1225.36	2190.7	3169.07	4133.99	5114.98	5971.09	6835.44
666.5	-22.4217	-15.7082	-8.29803	-2.08354	78.3023	499.143	1228.09	2187.89	3158.34	4139.37	5110.97	5973.62	6844.65
667	-20.9204	-16.1578	-7.7041	-1.08815	77.5976	498.022	1226.46	2182.61	3162.46	4151.72	5112.06	5976.02	6854.65
667.5	-18.29	-15.5292	-6.37698	-1.45947	78.6274	493.876	1223.24	2185.73	3160.86	4149.09	5111.67	5986.77	6850.09
668	-20.3999	-16.3302	-6.50468	-1.1528	78.2432	490.009	1225.74	2190.76	3155.17	4147.47	5114.99	5990.5	6850.61
668.5	-21.3049	-16.1166	-8.10485	0.411777	76.3514	490.465	1230.72	2189.29	3153.02	4152.22	5119.68	5986.68	6865.11
669	-20.9013	-15.4738	-8.94256	0.424728	77.5432	493.645	1238.31	2186.84	3154.92	4150.88	5119.85	5979.22	6878.49
669.5	-19.4392	-15.2445	-8.20352	-0.299836	80.7638	495.015	1240.14	2183.1	3155.09	4140.41	5123.06	5979.94	6884.93
670	-20.3268	-14.8104	-7.89302	0.413065	79.8864	493.877	1245.87	2187.44	3154.2	4130.01	5124.46	5975.92	6880.96
670.5	-19.4765	-14.0761	-8.84318	-1.07945	78.4641	491.821	1244.3	2193.64	3151.81	4139.56	5125.33	5972.93	6874.8
671	-19.7206	-14.4885	-8.63622	-0.912127	79.5051	491.21	1240.8	2196.91	3154.65	4151.23	5115.74	5977.78	6872.45
671.5	-19.0216	-14.3635	-7.75786	-2.29853	77.6568	493.967	1238.36	2198.16	3154.29	4152.35	5106.22	5983.01	6887.96
672	-19.3476	-14.135	-6.95197	-2.09823	74.3282	495.011	1237.98	2193.66	3155.35	4146.78	5107.09	5990.17	6894.97
672.5	-17.8571	-14.482	-8.06952	-2.98296	72.5584	493.239	1243.77	2195.96	3157.52	4144.85	5108.03	5989.75	6894.96
673	-16.9224	-15.3349	-7.68216	-1.28848	73.6804	493.685	1248.57	2200.84	3154.01	4154.46	5107.38	5980.45	6888.15
673.5	-17.618	-15.5701	-8.83676	-1.29984	75.8152	496.039	1244.27	2192.83	3149.94	4164.22	5104.28	5972.55	6877.43
674	-19.1685	-15.1138	-9.93518	-2.84671	76.1978	497.825	1245.53	2179.6	3155.42	4165.27	5103.68	5969.34	6856.33
674.5	-18.2531	-14.7386	-10.609	-3.10179	72.5341	498.146	1252.23	2183.16	3158.39	4165.66	5110.37	5959.86	6851.24
675	-17.98	-13.1341	-8.34158	-2.76516	71.7611	502.509	1248.74	2190.45	3162.83	4159.72	5112.39	5951.68	6854.02
675.5	-17.3279	-15.6942	-7.89393	-4.35321	72.0145	500.47	1247.29	2188.49	3161.59	4151.98	5108.73	5952.14	6859.15
676	-16.372	-15.6645	-8.20868	-5.57672	72.9917	501.646	1245.2	2182.27	3159.36	4141.53	5101.3	5953.98	6867.39
676.5	-18.4348	-15.1577	-9.47564	-3.59431	72.0873	502.522	1246.33	2174.26	3161.62	4132.61	5099.76	5957.93	6875.54
677	-17.5375	-15.9658	-10.1485	-1.81174	71.4139	502.135	1246.32	2166.76	3161.78	4136.16	5093.58	5963.76	6879.02
677.5	-16.7674	-15.3959	-9.09394	-1.24925	70.5492	500.62	1250.79	2158.98	3168.97	4141.21	5086.59	5962.82	6876.89
678	-15.7557	-16.4728	-8.61452	-2.48529	72.5141	501.76	1257.9	2156.58	3176.96	4135.32	5089.15	5953.01	6884.62
678.5	-16.2767	-14.5153	-8.52207	-0.785391	73.0627	498.688	1262.89	2162.64	3172.44	4130.59	5082.92	5951.43	6886.52
679	-17.2782	-14.7865	-10.3714	-2.02337	74.8988	498.332	1266.43	2175.68	3167.62	4127.09	5075.67	5951.54	6877.89
679.5	-17.9112	-16.9901	-9.56963	-1.6946	75.1025	496.213	1262.61	2179.76	3165.28	4120.13	5075.34	5950.37	6870.76
680	-17.2599	-15.8222	-10.1069	-1.92514	75.0893	499.877	1256.05	2173.55	3166.67	4128.29	5079.79	5963.94	6887.28
680.5	-18.6692	-14.988	-8.98468	-1.8884	74.0663	496.111	1261.19	2170.82	3173.88	4141.9	5093.38	5968.95	6901.34
681	-19.0269	-15.9629	-8.47479	-1.99127	76.3	495.418	1269.48	2172.34	3176.04	4144.46	5110.45	5961.01	6913.68
681.5	-18.2789	-15.9494	-7.75168	-0.921451	77.0109	498.015	1269.89	2177.86	3176.36	4141.9	5122.23	5969.46	6924.92
682	-20.0187	-14.733	-7.7487	0.0166125	77.822	496.484	1273.96	2187.1	3178.26	4130.52	5137.17	5974.91	6920.25
682.5	-20.3312	-15.8211	-8.70778	-0.282293	77.9421	499.752	1272.4	2191.13	3179.18	4126.19	5137.82	5980.2	6914.34
683	-19.8063	-14.7199	-9.15439	-0.179677	76.6668	504.871	1266.7	2181.59	3184.65	4138.22	5121.73	5983.22	6911.11
683.5	-19.5617	-14.0118	-9.34635	-0.444681	75.393	504.859	1266.61	2175.58	3178.54	4146.01	5111.36	5990.43	6906.97
684	-19.3157	-14.956	-10.1634	-1.38619	76.7685	506.249	1266.07	2175.19	3180.42	4135.87	5117.71	5991.52	6904.69
684.5	-18.3179	-14.4764	-8.86226	-1.0845	75.4829	507.571	1262.3	2173.41	3178.83	4127.41	5127.91	5983.16	6910.04
685	-18.8695	-16.0441	-8.51352	-1.33366	73.4708	510.025	1258.63	2170.89	3176.91	4126.18	5129.71	5972.1	6916.95
685.5	-18.8744	-16.1339	-8.4381	-0.647249	72.0061	510.24	1259.86	2167.07	3180.27	4122.61	5143.54	5973.92	6916.02
686	-18.0228	-14.6051	-9.07719	-0.980444	73.2267	507.328	1257.84	2163.33	3180.83	4124.59	5142.99	5979.47	6907.54
686.5	-18.7961	-15.1894	-8.28814	-0.708079	75.8871	509.206	1252.48	2162.02	3173.41	4132.82	5139.13	5982.69	6907.94
687	-19.3627	-14.9194	-8.0644	-0.964616	77.5012	509.421	1252.27	2160.51	3173.28	4140.49	5131.45	5973.52	6915.23
687.5	-18.3045	-15.5995	-8.51124	-1.63564	78.2635	508.634	1251.21	2159.14	3178.87	4140.03	5123.32	5967.78	6916.87
688	-17.8966	-15.8668	-7.9451	-1.03534	80.4483	511.274	1255.27	2163.51	3174.49	4138.7	5115.42	5978.43	6915
688.5	-18.8011	-15.9913	-6.58952	-0.967334	78.3156	517.279	1255.85	2164.97	3172.06	4133.9	5117.4	5974.81	6912.17
689	-19.1121	-15.0044	-7.84686	-2.60291	78.5941	516.28	1254	2167.76	3172.78	4140.85	5127.71	5959.83	6905.11
689.5	-19.1874	-13.9884	-7.63107	-1.38492	77.7116	515.269	1249.05	2169.08	3176.94	4152.91	5132.24	5960.43	6897.61
690	-20.0092	-12.9081	-7.88584	0.20774	77.5247	516.817	1250.24	2170.38	3175.43	4153.31	5135.49	5965.37	6886.54
690.5	-17.9422	-14.212	-8.67933	0.0551855	78.1489	519.374	1255.78	2178.02	3170.11	4156.13	5131.28	5970.37	6882.3
691	-17.6288	-14.5473	-6.89997	-1.67842	78.6135	520.913	1258.79	2188.11	3170.23	4156.06	5128.44	5964.75	6877.42
691.5	-17.6	-12.9939	-7.00228	-3.00267	79.3154	515.964	1259.98	2197.14	3166.6	4149.02	5131.89	5958.27	6874.24
692	-17.5384	-13.75	-9.3743	-1.35403	76.4911	511.951	1261.74	2201.14	3174.3	4145.61	5138.42	5959.15	6871.31
692.5	-18.4642	-15.1898	-9.28048	-1.73717	75.7217	511.461	1262	2200.11	3180.85	4145.83	5131.45	5965.87	6862.11
693	-18.9292	-14.5866	-8.13573	-1.60786	76.1183	511.933	1257.59	2198.3	3180.16	4146.31	5119.06	5968	6851.91
693.5	-19.6064	-14.5817	-8.05692	-2.34005	78.9647	510.337	1256.33	2187.93	3181.12	4148.37	5116.75	5965.14	6857.06
694	-19.0158	-14.1812	-9.47763	-2.3078	81.1672	506.178	1260.34	2173.35	3177.36	4152.92	5114.56	5963.78	6865.13
694.5	-19.4841	-15.2605	-9.43621	-1.34385	82.6038	506.143	1266.71	2164.46	3177.79	4149.48	5110.11	5958.04	6877.93
695	-18.5358	-14.6013	-10.3642	-1.46251	82.5546	509.512	1272.66	2161.26	3184.21	4149.01	5113.19	5948.14	6883.72
695.5	-17.2145	-14.5441	-10.0583	-1.56769	85.0207	511.236	1276.23	2169.11	3191.87	4150.89	5111.94	5952.76	6893.87
696	-18.2868	-15.0716	-10.3604	-2.28781	82.5345	509.579	1275.84	2173.75	3190.16	4149.42	5104.05	5965.93	6894.72
696.5	-18.8142	-15.1623	-8.91813	-1.85493	79.8001	506.426	1275.51	2174.38	3189.76	4154.65	5100.66	5975.78	6889.64
697	-17.3294	-16.2421	-8.88319	-3.58824	80.0239	503.674	1276.36	2173.55	3183.33	4161.41	5097.99	5966.41	6876.08
697.5	-19.017	-17.1667	-9.27003	-2.52301	81.3802	506.231	1269.32	2163.96	3177.47	4153.42	5098	5960.9	6881.93
698	-18.4457	-16.2102	-8.50617	-1.73835	82.6007	501.652	1269.9	2160.4	3174.09	4140.49	5107.25	5957.6	6883.52
698.5	-18.6678	-16.1635	-9.31344	-3.03806	81.3948	498.86	1266.48	2172.07	3169.75	4143.83	5105.29	5953.76	6877.18
699	-20.1791	-16.5244	-9.83903	-3.22092	84.5782	502.384	1266.23	2175.57	3165.14	4152.04	5109.37	5957.69	6874.59
699.5	-19.6887	-16.2149	-8.54729	-1.67899	86.5907	504.789	1265.72	2177.06	3159.03	4152.38	5117.83	5964.82	6877.23
700	-19.4268	-16.0614	-9.36253	-1.21714	85.1176	507.521	1268.41	2174.81	3154.31	4142.8	5121.4	5966.74	6872.83
700.5	-17.8556	-15.9435	-9.7301	-1.56116	87.1077	510.663	1261.26	2178.01	3153.18	4148.75	5116.37	5966.77	6868.94
701	-17.7714	-15.9194	-9.67982	-1.25504	86.2966	510.103	1262.8	2178.27	3149.11	4152.12	5110.71	5973.39	6850.06
701.5	-18.3264	-14.4992	-9.00573	0.436259	86.2463	511.229	1264.78	2176.77	3151.01	4152.92	5106.51	5972.91	6836.07
702	-17.7891	-15.3861	-7.50358	0.77352	85.9361	512.165	1269.28	2178.79	3158.4	4157.12	5113.97	5971.79	6829.62
702.5	-17.9177	-14.985	-7.32919	-0.356235	85.2152	509.643	1269.21	2174.93	3161.81	4164.16	5123.5	5965.61	6835.52
703	-18.5984	-14.4777	-8.70486	-1.40045	84.7659	507.808	1267.93	2169.94	3166.9	4162.78	5110.04	5964.68	6838.48
703.5	-18.2286	-13.5614	-7.91828	-1.32008	86.3243	510.011	1263.74	2164.48	3162.17	4158.74	5101.43	5973.59	6848.15
704	-16.215	-14.1877	-9.37573	-0.583517	88.0172	510.256	1255.96	2169	3146.75	4170.69	5108.36	5987.47	6862.91
704.5	-16.196	-14.6425	-7.53833	-0.286862	87.3027	514.269	1254.79	2174.71	3142.67	4181.67	5111.57	5984.26	6874.45
705	-16.2848	-14.2016	-7.65318	-1.41928	88.2916	518.608	1258.2	2169.31	3148.83	4174.46	5112.71	5968.56	6879.14
705.5	-18.3909	-14.052	-7.82605	-1.98529	85.8392	519.238	1261.41	2162.68	3146.83	4164.83	5115.46	5956.29	6881.85
706	-18.614	-14.1941	-8.26345	-3.18926	84.9459	516.51	1266.89	2156.36	3143.18	4160.71	5125.25	5951.13	6873.95
706.5	-18.7558	-13.672	-8.07603	-2.42239	88.9999	512.188	1278.26	2161.71	3144.66	4162.31	5135.96	5959.87	6879.1
707	-17.6019	-13.1696	-8.89507	-1.15861	90.9797	509.182	1285.21	2171.56	3155.89	4160.55	5128.43	5959.09	6895.27
707.5	-17.614	-14.0833	-8.98594	0.404751	91.4712	509.13	1283.21	2174.18	3164.52	4159.94	5118.68	5964.91	6898.87
708	-17.4308	-14.6164	-7.70648	-1.18933	93.2885	507.738	1277.85	2176.23	3164.85	4154.41	5117.18	5962.14	6899.08
708.5	-19.1575	-12.4644	-7.34988	-1.38353	92.1142	506.669	1280.57	2177.54	3169.19	4152.11	5111.58	5962.07	6896.05
709	-17.1782	-12.9242	-8.54442	-2.44149	90.5976	504.923	1284.28	2176.14	3172.13	4151.6	5103.31	5969.86	6890.21
709.5	-17.9844	-14.3896	-8.67237	-2.34583	87.9049	501.576	1284.98	2173.95	3179.97	4145.12	5101.42	5967.42	6885.48
710	-17.6802	-14.0471	-9.47809	-1.43499	85.2816	501.477	1282.2	2172.39	3189.67	4138.56	5107.72	5972.15	6891.33
710.5	-18.037	-13.2917	-9.65911	-1.40095	82.2712	502.043	1283.67	2168.56	3186.3	4132.02	5110.38	5978.76	6896.04
711	-19.1306	-14.8394	-9.47084	-1.30257	83.2366	494.394	1280.97	2162.12	3178.98	4132.12	5118.54	5980.89	6893.35
711.5	-18.834	-15.3148	-8.72653	-0.809769	82.1697	493.024	1276.33	2160.34	3178.24	4137.99	5118.45	5986.86	6885.71
712	-18.3279	-13.2073	-9.00781	-0.895711	79.7125	494.061	1277.54	2165.21	3170.15	4141.91	5112.8	5985.5	6880.08
712.5	-16.8406	-15.5988	-9.58067	-1.91412	78.0546	495.373	1281.04	2170.23	3168.5	4134.14	5113.52	5989.66	6882.56
713	-15.6164	-14.1234	-8.14254	-1.67479	78.7156	497.711	1281.91	2176.93	3168.09	4126.26	5116.99	5984.4	6876.75
713.5	-18.5364	-14.2085	-9.02063	-2.127	76.4815	498.435	1279.1	2179.55	3167.47	4136.92	5115.62	5995.58	6871.14
714	-19.0144	-14.9675	-8.87679	-2.28651	77.7733	499.512	1282.98	2176.73	3165.19	4144.18	5119.29	6012.21	6874.47
714.5	-19.6024	-15.1514	-7.71458	-2.01644	81.7727	497.541	1283.94	2171.65	3159.07	4140.14	5127.88	6017.74	6872.28
715	-19.5534	-15.7747	-9.42268	-3.33169	82.2741	504.392	1277.94	2172.24	3145.43	4143.67	5133.73	6007.98	6868.9
715.5	-19.7914	-17.2363	-8.82719	-3.32908	82.8533	506.227	1274.94	2179.37	3138.47	4148.09	5133.63	6000.03	6864.41
716	-19.4443	-17.465	-9.40985	-1.97142	81.9145	507.725	1275.24	2181.36	3138.78	4146.34	5126.6	5998.05	6866.76
716.5	-20.3661	-15.7317	-8.17063	-1.49491	80.193	510.908	1277.54	2173.65	3141.02	4144.06	5127.37	6004.54	6872.8
717	-18.5074	-15.4764	-8.30203	-0.996623	80.0055	511.458	1280.67	2166.35	3142.88	4145.56	5125.08	6006.15	6874.09
717.5	-19.0377	-14.6428	-6.93875	-1.32851	81.3093	508.853	1278.77	2163.52	3134.5	4149.91	5110.54	5991.88	6862.99
718	-19.2319	-16.9672	-6.53078	-3.49055	81.6963	506.027	1275.1	2162.01	3132.93	4150.2	5111.11	5986.06	6861.19
718.5	-17.5023	-16.2234	-7.94756	-1.33339	81.6527	505.282	1272.84	2160.95	3127.3	4141.96	5113.31	5990.72	6866.09
719	-18.4953	-14.2955	-7.66293	-0.38649	80.0881	508.309	1270	2164.48	3126.4	4132.64	5109.57	5995.73	6878.79
719.5	-19.2525	-14.1437	-7.44487	-0.842226	79.0111	510.013	1271.6	2170.26	3132.47	4140.7	5104.32	6000.65	6877.05
720	-20.3528	-14.9462	-7.39075	-2.07499	78.2816	508.351	1271.83	2178.8	3132.32	4143.67	5097.08	5999.29	6869.71
720.5	-20.6945	-14.4818	-8.0557	-1.98449	73.1911	504.033	1263.85	2185.08	3126.68	4153.38	5095.37	6001.57	6875.36
721	-19.8134	-14.4771	-8.00365	-2.60408	73.7092	501.1	1263.98	2180.65	3121.89	4147.48	5098.54	5997.89	6889.42
721.5	-18.5864	-14.7019	-8.07211	-2.14819	74.8279	504.544	1269.35	2168.08	3124.57	4146.35	5099.98	5989.62	6896.39
722	-16.765	-12.4746	-7.99222	-3.48969	72.6193	506.502	1267.94	2159.66	3122.28	4152.1	5097.46	5995.62	6885.45
722.5	-17.7777	-11.7937	-8.68515	-3.70746	72.8467	506.109	1265.21	2160.96	3128.08	4160.5	5091.4	6005	6877.41
723	-18.4649	-13.5538	-8.51572	-2.22464	72.1785	506.805	1262.15	2176.49	3137.66	4161.89	5082	6002.72	6884.14
723.5	-18.4734	-14.3017	-8.55706	-0.592123	73.7398	507.337	1259.95	2180.84	3140.07	4154.93	5075.69	5990.67	6895.73
724	-17.7644	-14.8926	-9.11247	-1.60164	75.279	506.645	1260.23	2176.06	3135.93	4150.86	5064.55	5986.65	6898.18
724.5	-16.6988	-13.5284	-8.54438	-0.289596	75.7934	504.164	1267.16	2172.91	3145.42	4157.84	5063.33	5993.1	6887.74
725	-16.5596	-14.2415	-9.36434	-0.769533	73.2707	503.777	1267.77	2178.86	3147.48	4157.39	5076.62	5996.72	6884.46
725.5	-17.7559	-13.4662	-7.74609	-1.60564	71.7818	510.421	1265.9	2182.35	3145.99	4159.48	5080.04	5991.34	6876.72
726	-16.7043	-14.0231	-7.58032	-1.12341	71.3373	515.085	1263.78	2181.09	3146.14	4170.32	5079.96	5995.59	6878.03
726.5	-17.2443	-14.2815	-9.70929	-1.36317	71.5422	513.436	1259.51	2176.6	3144.41	4174.48	5075.65	5994.17	6882.21
727	-18.5851	-13.5737	-8.81844	-2.88427	71.8932	516.682	1257.67	2174.17	3140.91	4174.94	5082.85	5999.32	6893.42
727.5	-16.7049	-13.4868	-8.60717	-2.6951	70.2679	517.52	1259.76	2185.13	3134.19	4173.32	5085.14	6000.36	6896.38
728	-17.2409	-14.2576	-9.57396	-2.89548	71.2833	516.371	1264.14	2193.52	3137.35	4171.67	5082.8	5994.34	6906.31
728.5	-17.0778	-14.4161	-9.32112	-2.32715	69.3961	513.163	1261.37	2186.09	3141.91	4167.19	5083.95	5997.58	6908.57
729	-16.535	-14.2399	-10.1915	-1.85603	67.7132	506.899	1257.32	2179.26	3145.67	4166.86	5077.55	5996.85	6900.76
729.5	-16.8865	-15.4636	-9.99252	-4.40312	70.0432	506.053	1254.86	2182.07	3142.14	4177.45	5062.59	5994.32	6897.25
730	-18.2028	-15.4083	-9.52677	-2.58529	71.2304	507.353	1254.56	2188.69	3137.94	4182.85	5059.01	5984.04	6897.93
730.5	-18.0446	-15.5257	-8.73293	-2.34676	72.7949	508.428	1259.47	2187.33	3138.59	4177.91	5061.41	5971.69	6899.97
731	-16.7881	-15.5477	-9.48155	-1.57138	73.8038	508.449	1262.63	2185.62	3133.97	4163.17	5066.04	5967.63	6892.82
731.5	-17.3012	-15.1349	-9.99844	-1.59955	74.0923	512.032	1261.47	2189.51	3128.63	4159.8	5070.81	5968.41	6881.62
732	-18.7976	-14.8184	-10.4552	-0.522407	71.5496	512.582	1260.39	2191.96	3122.94	4167.51	5078.23	5966.64	6878.77
732.5	-17.58	-15.1362	-8.80967	-1.14566	70.1347	508.78	1257.83	2193.76	3124.52	4184.96	5079.34	5967.31	6874.95
733	-18.342	-16.3914	-7.42196	-1.44723	70.0599	509.073	1258.63	2204.08	3130.14	4189.82	5082.25	5958.8	6878.2
733.5	-18.7648	-14.4869	-8.63522	-1.80029	70.8247	510.48	1260.98	2207.42	3135.1	4182.93	5083.39	5958.12	6878.58
734	-17.4284	-14.9468	-7.54285	-2.95132	72.5355	512.439	1263.51	2199.92	3135.57	4184.05	5087.99	5966.63	6874.19
734.5	-18.096	-14.3092	-8.31283	-1.7316	72.9155	516.903	1263.43	2193.63	3136.98	4197.18	5090.41	5966.8	6871.88
735	-16.8442	-14.8685	-7.97274	1.32679	72.1021	516.07	1262.03	2191.6	3143.97	4206.25	5098.51	5966.85	6862.9
735.5	-17.2313	-15.9709	-7.54812	-0.959396	72.6842	511.659	1264.44	2190.01	3156.81	4205.16	5100.69	5965.37	6850.18
736	-17.2147	-16.4737	-6.25116	-1.9111	74.0523	508.811	1262.92	2193.59	3155.96	4201.66	5095.68	5947.17	6866.73
736.5	-19.0967	-14.1408	-7.66946	-1.68032	74.8	510.013	1261.87	2191.79	3152.15	4201.63	5096.07	5933.07	6864.81
737	-19.0909	-14.0072	-7.54493	-0.686017	76.8637	512.239	1258.88	2180.02	3146.25	4198.65	5090.96	5939.28	6859.23
737.5	-18.8418	-14.2776	-8.85225	-0.323512	77.4562	512.327	1257.23	2180.79	3140.59	4187.2	5083.9	5950.1	6863.75
738	-19.2942	-15.4354	-9.10599	-0.209809	77.1177	512.428	1252.63	2175.05	3142.74	4178.24	5085.62	5943.32	6871.11
738.5	-16.8432	-14.2302	-8.23185	-0.218863	76.2635	514.186	1256.28	2171.45	3147.13	4181.57	5085.08	5934.62	6874.09
739	-18.5182	-14.2349	-9.45012	0.844288	76.5911	514.526	1257.47	2171.84	3141.25	4190.36	5084.62	5946.56	6876.59
739.5	-18.8814	-13.8383	-8.22498	-1.25141	75.99	511.092	1254.92	2175.2	3140.51	4192.63	5099.89	5964.41	6868.75
740	-19.0397	-13.714	-5.86066	-2.05682	76.4922	512.136	1257.15	2177.26	3133.1	4192.61	5106.11	5966.16	6859.67
740.5	-19.3607	-14.6767	-7.53448	-0.253857	77.1627	515.751	1266.56	2179.88	3127.3	4183.06	5107.64	5957.06	6856.13
741	-17.7068	-14.7214	-9.19883	0.628374	78.8676	518.242	1266.81	2182.51	3135.6	4180.02	5100.41	5953.45	6865.84
741.5	-16.618	-14.5218	-8.56431	0.587631	76.7455	520.736	1260.94	2189.05	3146.61	4187.39	5087.96	5951.22	6865.04
742	-16.8462	-13.8104	-7.30659	0.109157	76.5382	524.02	1260.75	2188.39	3156.55	4187.73	5081.11	5941.9	6864.84
742.5	-16.8484	-14.7901	-7.49158	-1.10189	77.443	527.476	1257.12	2175.76	3161.1	4188.13	5085.35	5938.34	6875.37
743	-16.4536	-14.5295	-7.31322	-1.55622	80.5728	530.347	1247.76	2173.5	3156.69	4197.24	5098.33	5940.66	6878.48
743.5	-16.7739	-13.5417	-7.47365	-1.10169	78.8598	526.942	1243.03	2175.28	3158.94	4196.44	5095.48	5955.23	6865.69
744	-16.2908	-13.8302	-9.39771	-1.08738	76.4203	523.565	1244.7	2183.99	3157.53	4199.65	5091.51	5951.08	6868.99
744.5	-17.2345	-16.1875	-9.22736	-0.488517	76.631	521.724	1249.38	2187.08	3151.36	4193.51	5090.2	5948.82	6880.62
745	-17.5284	-14.5489	-9.01992	0.597674	76.6798	520.147	1253.63	2187.53	3154.36	4191.59	5091.92	5944.07	6885.86
745.5	-17.1195	-15.6903	-8.29567	0.238844	76.3994	518.167	1257.29	2187.06	3158.46	4199.17	5096.81	5955.38	6895.64
746	-17.3672	-15.7325	-7.95999	-0.738024	77.177	519.283	1262.83	2186.52	3160.85	4204.24	5095.92	5965.78	6889.02
746.5	-17.0289	-15.03	-8.65552	-1.29205	77.1026	518.345	1274.07	2190.45	3150.21	4206.95	5093.21	5960.13	6879.79
747	-17.4759	-14.7209	-9.65012	-0.16647	79.2331	520.009	1276.51	2191.51	3147.31	4205.96	5095.96	5955.2	6886.86
747.5	-18.4232	-15.5782	-8.5339	0.549262	78.7846	522.634	1274.98	2191.43	3155.43	4198.31	5100.99	5953.4	6893.06
748	-17.8608	-14.9237	-9.34564	0.308603	79.1538	521.905	1278.88	2188.58	3162.55	4199.47	5109.81	5955.66	6894.39
748.5	-18.614	-14.5981	-8.99463	1.9526	82.2964	520.789	1283.65	2187.48	3165.67	4203.97	5107.88	5964.25	6887.31
749	-19.7863	-15.5984	-8.11905	2.30597	83.0356	514.642	1280.66	2189.29	3164.21	4195.7	5108.17	5966.65	6877.32
749.5	-19.0578	-16.4111	-7.71881	3.06517	82.8201	514.397	1277.35	2191.03	3166.94	4190.89	5114.9	5965.27	6873.3
750	-18.1315	-15.5894	-7.83401	2.4542	80.7211	513.752	1275.77	2183.73	3169.4	4190.03	5116.81	5963.07	6875.39
750.5	-19.4028	-14.2641	-9.4048	1.05514	77.6295	511.04	1271.66	2182.51	3175.04	4187.8	5114.16	5957.06	6874.79
751	-18.1633	-15.6147	-8.17905	0.882589	78.4752	514.318	1265.92	2179.14	3179.4	4185.34	5115.18	5953.54	6871.52
751.5	-18.3321	-15.6638	-8.22528	-0.0814606	78.4783	517.177	1261.4	2173.54	3181.19	4184.42	5101.55	5948.21	6882.07
752	-19.361	-15.782	-7.00257	0.515773	78.9963	518.605	1257.85	2178.54	3176.61	4182.64	5086.31	5945.95	6884.51
752.5	-18.6056	-15.4737	-6.95462	1.92891	79.3094	519.665	1255.1	2177.94	3176.91	4178.78	5092.65	5944.73	6879.84
753	-18.7326	-14.7809	-8.43323	-0.159518	79.0852	522.276	1258.72	2172.76	3176.5	4177.87	5092.18	5941.43	6881.3
753.5	-19.896	-15.6237	-8.62211	-1.06321	77.5888	526.678	1259.58	2166.94	3177.74	4180.74	5089.13	5936.62	6878.46
754	-19.7137	-14.26	-9.1989	-0.247994	77.1035	529.319	1267.65	2162.19	3179.46	4177.3	5078.05	5942.33	6884.18
754.5	-18.2993	-13.7696	-8.61516	0.864963	77.2744	527.632	1271.96	2161.82	3178.57	4172.51	5081.21	5948.3	6882.14
755	-18.349	-13.6497	-6.40203	0.216109	76.3384	526.726	1270.38	2159.89	3180.37	4172.3	5082.76	5947.23	6880.2
755.5	-18.5537	-14.5806	-7.67918	-3.03776	77.0876	529.219	1269.05	2161.93	3178.06	4175.04	5077.22	5953.23	6888.43
756	-17.6677	-14.5436	-8.62453	-0.47086	75.8801	530.916	1262.83	2168.69	3178.11	4173.75	5079.24	5950.47	6894.38
756.5	-18.2738	-12.7611	-9.06052	0.157305	79.8089	532.066	1265.62	2169.58	3181.06	4169.78	5090.56	5948.72	6883.57
757	-17.7663	-13.4994	-8.95505	0.904754	80.838	534.965	1270.8	2172.19	3186.82	4173.47	5087.87	5939.45	6890.62
757.5	-17.6707	-14.5402	-7.99567	0.435083	81.0098	536.043	1268.5	2176.66	3188.88	4176.58	5084.56	5935.65	6896.65
758	-16.4516	-14.1767	-9.63824	-0.498598	79.1568	538.202	1260.35	2176.52	3185.51	4179.96	5087.77	5947.2	6895.48
758.5	-16.238	-14.5385	-9.57673	-0.407743	79.7865	539.572	1256.44	2175.34	3184.24	4177.57	5088.86	5941.2	6897.46
759	-18.0137	-15.6642	-8.2182	-0.55237	79.7496	536.077	1258.66	2180.84	3189.3	4173.32	5086.09	5933.09	6898.83
759.5	-18.1885	-15.7059	-7.49203	-1.10287	76.6574	535.287	1264.56	2183.63	3195.9	4176.98	5085.72	5936.89	6890.93
760	-17.3749	-13.5557	-7.68449	-0.100395	74.5287	533.37	1265.3	2184.02	3196.83	4182.76	5075.66	5940.38	6886.16
760.5	-16.6928	-13.6214	-8.43615	-1.21206	74.0551	532.483	1264.9	2184.53	3190.37	4183.05	5074.46	5945.94	6888.03
761	-16.6173	-14.8202	-10.1358	-0.542203	75.2212	536.198	1263.83	2177.49	3195.05	4179.93	5073.12	5956.31	6892.62
761.5	-16.3935	-15.1025	-10.3365	-1.35719	74.7533	533.885	1259.89	2176.17	3204.61	4172.76	5074.74	5955.59	6895.55
762	-17.1141	-16.1333	-8.5844	-3.32505	77.2347	531.661	1254.9	2180.72	3204.89	4177.15	5077.06	5952.93	6895.38
762.5	-16.8936	-15.7155	-7.81752	-1.79044	79.2151	532.115	1250.22	2181.8	3197.95	4173.17	5081.26	5958.83	6900.5
763	-17.7866	-14.7216	-9.22996	-2.6248	80.3891	531.406	1246.63	2183.23	3199.28	4166.18	5075.86	5964.86	6912.37
763.5	-17.5028	-15.1621	-10.0684	-2.51202	81.9019	525.698	1251.14	2181.26	3204.42	4160.91	5069.77	5978.18	6915.49
764	-17.9311	-15.7083	-9.67671	-0.0677433	81.4884	524.464	1257.36	2184.13	3210.16	4166.42	5068.85	5979.59	6900.73
764.5	-17.9897	-15.22	-8.05815	-0.662924	81.6605	521.486	1266.3	2191.67	3215.52	4169.95	5078.61	5977.36	6901.53
765	-18.243	-16.5318	-7.92135	0.338352	80.9582	520.73	1273.08	2191.62	3218.79	4166.5	5084.36	5973.62	6901.27
765.5	-19.4992	-16.1547	-7.9263	0.339184	81.1918	522.956	1272.4	2189.45	3212.74	4159.78	5080.04	5975.31	6902.83
766	-18.3357	-15.2436	-8.64872	-2.04984	80.037	520.412	1270.8	2183.79	3207.02	4158.75	5076.94	5968.47	6903.16
766.5	-18.8085	-14.5487	-8.74307	-0.401495	80.2678	520.691	1276.76	2176.18	3202.85	4162.59	5078.63	5969.97	6889.61
767	-18.6642	-15.4788	-8.99302	0.401876	80.4687	524.49	1276.46	2171.45	3195.43	4165.69	5081.16	5971.92	6878.79
767.5	-19.6436	-14.0716	-8.21387	-0.801035	81.2851	525.455	1273.96	2170.64	3194.26	4164.06	5090.15	5969.63	6878.11
768	-18.852	-14.8428	-10.0927	-1.89552	82.034	526.238	1271.36	2174.48	3189.75	4162.38	5095.9	5977.89	6880.99
768.5	-18.5075	-14.109	-8.49116	-2.24511	82.8939	525.374	1276.88	2175.46	3196.21	4163.05	5092.25	5983.63	6875.41
769	-17.3986	-15.2445	-8.02327	-1.68513	82.8077	524.515	1281.81	2185	3206.25	4167.29	5088.18	5986.89	6866.86
769.5	-18.1181	-15.479	-8.92721	-2.64706	83.2739	523.132	1279.89	2198.21	3202.2	4168.61	5080.68	5984.56	6866.43
770	-18.9064	-15.5166	-8.33816	-0.385042	83.6805	522.356	1277.91	2202.45	3187.03	4163.86	5087.5	5988.04	6861.85
770.5	-18.7356	-15.5094	-8.63792	0.623397	81.6362	521.126	1277.56	2202.06	3182	4157.55	5097.54	5993.49	6858.61
771	-17.2327	-15.1828	-7.8414	1.1955	82.1695	523.727	1273.35	2203.32	3188.87	4152.91	5100.14	5993.21	6851.26
771.5	-18.2088	-15.263	-7.47149	-0.0156999	80.4592	524.489	1276.4	2195.34	3189.19	4153.9	5105.48	5991.24	6846.19
772	-17.5194	-13.8183	-9.72931	-0.105301	79.3209	526.083	1284.72	2190.93	3182.3	4154.47	5114.68	5992.53	6851.45
772.5	-16.4438	-13.6287	-9.19577	-0.172194	78.4967	525.081	1291.79	2191.79	3171.33	4157.39	5121.04	5984.11	6857.79
773	-16.784	-15.5815	-7.27702	-0.477224	79.4726	524.393	1295.68	2191.24	3170.87	4159.05	5132.27	5981.59	6854.28
773.5	-16.1801	-14.3415	-8.33061	-0.911837	78.6913	524.224	1295.97	2189.51	3171.99	4156.55	5144.94	6000.61	6845.98
774	-16.5856	-13.9076	-9.32907	-1.17174	77.0173	523.243	1294.08	2187.83	3172.14	4154.86	5144.12	6007.51	6857.12
774.5	-17.1701	-13.8605	-8.98398	-3.03788	77.4883	526.663	1294.36	2190.05	3170.55	4163.34	5144.7	6008.03	6864.39
775	-16.2504	-12.9687	-7.87241	-2.03991	75.9737	529.014	1283.36	2197.2	3178.49	4168.36	5147.48	6009.53	6862.34
775.5	-14.5378	-13.6173	-9.8204	-1.35336	75.6483	526.015	1277.31	2200.34	3182.5	4163.12	5141.31	6007.11	6855.39
776	-17.3243	-15.2919	-8.47607	-0.845984	76.2853	525.393	1276	2202.08	3182.12	4161.37	5139.87	6001.84	6855.15
776.5	-16.5168	-14.2733	-9.22136	-2.82237	76.1744	525.097	1277.76	2201.56	3174.3	4155.64	5136.42	5996.08	6842.59
777	-17.8004	-15.0185	-8.58536	-1.60004	76.3461	524.568	1272.56	2207.53	3169.05	4147.13	5126.02	5989.62	6817.54
777.5	-16.0093	-14.2055	-9.22352	-0.737343	76.326	520.733	1273.8	2210.66	3163.3	4146.43	5121.19	5986.7	6805.47
778	-15.7158	-14.771	-10.3785	-1.84717	78.5263	520.172	1274.87	2216.42	3149.53	4150.54	5120.1	5984.16	6811.45
778.5	-16.2132	-13.9598	-9.02109	-1.41877	77.4422	523.161	1272.73	2220.54	3139.56	4156.56	5118.09	5972.69	6818.62
779	-17.3405	-16.1615	-10.6713	-0.208634	81.3704	524.876	1274.15	2220.55	3147.24	4159.63	5114.98	5962.09	6813.21
779.5	-18.8445	-15.9472	-9.09441	0.974198	82.9359	526.488	1274.08	2224.37	3161.94	4158.56	5104.01	5964.4	6827.66
780	-18.3773	-15.0757	-10.1809	-1.35695	80.4359	529.298	1275.43	2220.27	3169.93	4152.37	5089.21	5977.7	6838.77
780.5	-16.9034	-14.2515	-9.67223	-1.17721	78.4445	532.393	1279.01	2215.73	3177.92	4143.91	5085.85	5990.61	6828.62
781	-19.076	-15.1727	-10.8797	-0.367579	79.1124	531.945	1279.65	2217.57	3176.17	4138.43	5084.38	5990.55	6806.75
781.5	-19.6331	-15.8321	-9.85771	-1.17976	79.5681	532.628	1276.69	2221.35	3172.41	4132.1	5083.09	5986.4	6789.27
782	-19.2433	-14.7336	-8.47471	-0.608326	79.8524	534.678	1281.38	2219	3168.86	4131.18	5083.85	5977.72	6782.37
782.5	-20.9826	-15.3843	-8.73432	0.765664	79.9676	535.321	1282.81	2215.52	3174.71	4127.73	5086.08	5968.5	6782.58
783	-20.1379	-16.7029	-8.39664	-1.51996	81.3578	535.318	1285.57	2215.61	3178.56	4124.94	5091.03	5969.96	6795.62
783.5	-20.6033	-15.6279	-7.99808	-1.55092	80.9171	535.273	1287.69	2217.51	3176.32	4132.91	5093.58	5966.49	6809.02
784	-18.7642	-17.122	-9.52666	-0.477035	81.3743	532.153	1288.69	2221.19	3172.95	4134.23	5095.76	5964.02	6808.57
784.5	-17.7279	-17.4691	-8.27923	-0.779125	80.3791	525.626	1286.58	2226.97	3171.34	4132.89	5101.17	5960.95	6798.88
785	-17.3622	-16.4869	-8.70423	-1.97643	79.2697	520.472	1279.17	2223.59	3165.38	4135.94	5100.88	5958.11	6799.58
785.5	-18.7693	-15.6356	-7.22991	-1.53401	77.9447	523.694	1271.99	2215.38	3167.52	4142.83	5095.23	5954.08	6803.42
786	-19.1975	-13.8347	-8.13571	-2.55873	76.1824	525.599	1272.91	2208.63	3168.5	4139.12	5087.56	5956.64	6801.08
786.5	-19.8568	-14.2525	-9.20015	-1.38771	75.42	523.094	1277.5	2204.98	3169.99	4135.26	5080.45	5961.45	6801.09
787	-17.8692	-14.6261	-7.65835	-0.682119	76.7383	521.018	1279.56	2201.61	3166.76	4139.33	5070.25	5966.37	6807.37
787.5	-17.3478	-13.2745	-7.77251	0.687486	76.3284	523.803	1280.7	2196.58	3165.68	4136.34	5059.23	5974.42	6807.02
788	-17.668	-13.8252	-8.68508	0.560361	74.3943	523.978	1281.65	2191.89	3162.25	4137.17	5059.83	5974.17	6796.65
788.5	-18.3844	-13.2215	-8.74076	0.073891	71.2655	520.371	1284.69	2187.41	3160.02	4148.04	5056.49	5972.94	6782.28
789	-18.5262	-14.1465	-9.50072	0.650419	70.348	521.066	1288.75	2191.86	3153.95	4141.18	5072.71	5980.56	6782.21
789.5	-19.7196	-13.4537	-9.14748	-0.374597	69.7178	523.691	1293.1	2195.12	3150.21	4140.56	5088.64	5981.06	6794.88
790	-18.3401	-13.3969	-8.20736	-0.789136	69.8695	523.372	1288.42	2194.96	3157.09	4144.1	5088.04	5976.58	6799.81
790.5	-17.0519	-14.6399	-8.74808	-2.27921	69.9802	525.313	1284.56	2200.7	3157.98	4149.41	5084.52	5964.39	6795.4
791	-19.1625	-16.0249	-8.07604	-1.64244	71.4614	523.461	1282.97	2202.01	3157.73	4155.93	5098.19	5960.75	6796.58
791.5	-19.8929	-16.8101	-7.94964	-0.313415	71.5305	520.823	1282.02	2196.76	3150.82	4154.35	5103	5962.75	6802.44
792	-18.7241	-15.2336	-8.18466	-2.84054	71.5292	517.878	1280.12	2194.12	3144.85	4148	5102.12	5968.94	6806.92
792.5	-19.4783	-16.5919	-8.25407	-3.29296	69.2841	520.842	1281.03	2196.56	3154.65	4141.97	5107.07	5969.49	6808.21
793	-19.3543	-14.9037	-8.07359	-1.85158	64.3612	520.953	1283.14	2199.83	3156.42	4137.06	5109.51	5971.43	6809.67
793.5	-19.256	-13.6525	-7.95814	-1.51088	66.8041	522.459	1278.13	2200.61	3150.91	4133.32	5106.2	5975.42	6814.56
794	-17.8128	-14.6077	-8.76788	-3.3318	68.3657	517.23	1272.53	2192.34	3153.17	4134.42	5100.52	5975.5	6817.54
794.5	-19.896	-15.1791	-8.01707	-3.2767	67.604	515.066	1274.88	2190.66	3156.42	4131.45	5102.65	5974.98	6804.88
795	-18.6547	-15.5638	-8.32873	-3.6179	69.0863	516.699	1276.97	2194.95	3154.68	4128.14	5102.7	5962.47	6802.21
795.5	-19.122	-14.8616	-7.66637	-1.58743	70.6171	517.308	1278.67	2197.16	3154.88	4125.1	5102.32	5947.93	6807.51
796	-19.2768	-14.3349	-9.00078	-2.66597	72.9585	518.952	1277.92	2191.16	3154.25	4123.83	5095.81	5934.81	6816.18
796.5	-20.076	-14.1922	-10.1992	-0.512827	74.3847	524.468	1277.59	2184.23	3154.82	4125.9	5083.27	5923.5	6816.28
797	-19.3514	-15.5567	-8.91993	-0.993384	77.1344	529.834	1278.21	2188.34	3154.55	4120.92	5088.06	5918.54	6820.44
797.5	-18.8246	-15.2054	-8.23939	-1.72668	78.8577	530.713	1276.46	2188.47	3150.55	4123.59	5100.1	5929.75	6840.35
798	-19.5188	-15.9865	-8.92853	-2.35107	79.1616	531.456	1275.55	2182.21	3150.76	4131.98	5100.83	5937.26	6850.1
798.5	-18.7742	-16.2258	-7.95411	-2.65509	79.7186	533.729	1277.3	2180.03	3159.43	4139.52	5096.86	5943.45	6847.91
799	-19.394	-15.001	-7.55475	-1.56285	77.7999	538.159	1280.06	2186.15	3159.26	4147.32	5097.63	5943.14	6848.85
799.5	-19.3442	-14.0331	-8.27733	-1.863	78.0633	539.889	1280.83	2179.81	3147.13	4152.69	5096.26	5936.57	6851.68
800	-18.6547	-14.2019	-9.01404	-2.91524	78.4136	537.746	1282.9	2171.11	3137.16	4155.91	5095.19	5942.98	6850.89
800.5	-18.3209	-14.2603	-9.57844	-2.82137	77.0016	539.011	1286.89	2169.01	3135.57	4149.22	5096.21	5951.51	6855.14
801	-18.9468	-13.406	-9.70265	-3.0396	74.5205	538.986	1285.15	2174.64	3136.53	4152.94	5095.95	5942.16	6845.55
801.5	-17.915	-13.9515	-8.4158	-2.09861	72.4912	539.456	1276.42	2177.45	3135.03	4162.62	5091.14	5932.87	6847.4
802	-17.2997	-14.4165	-8.50827	-1.51602	75.6505	539.651	1276.25	2174.13	3129.52	4165.93	5086.06	5937.83	6860.71
802.5	-19.0142	-14.5988	-8.72682	-0.443489	78.0946	540.396	1275.83	2172.69	3125.19	4161.78	5091.48	5950.24	6867.58
803	-18.8527	-13.9341	-8.01415	-0.920871	77.9278	541.576	1281.22	2177.96	3126.84	4159.51	5103.16	5949.49	6869.14
803.5	-18.6064	-15.1704	-9.01453	-1.33265	78.7966	539.77	1287.97	2178.28	3128.26	4155.62	5103.6	5950.67	6856.9
804	-18.1821	-14.715	-9.24287	-0.171857	79.4746	538.479	1283.85	2181.41	3129.81	4150.43	5099.54	5957.6	6845.63
804.5	-17.3998	-13.6139	-8.12414	-0.404788	81.4244	536.067	1284.55	2185.35	3133.79	4154.74	5100.9	5961.69	6847.04
805	-15.817	-14.3259	-8.46703	-0.335066	83.6221	538.024	1289.31	2186.25	3137.03	4163.22	5112.29	5963.63	6841.54
805.5	-16.6389	-14.9605	-8.02666	-2.23035	82.5325	539.125	1294.78	2177.74	3136.18	4159.4	5110.58	5972.11	6835.62
806	-17.4106	-13.6401	-8.58408	-2.09839	82.7124	539.484	1292.88	2167.36	3139.58	4148.55	5099.93	5989.76	6834.95
806.5	-18.0024	-14.6628	-8.61236	-1.05244	82.163	542.046	1288.7	2159.47	3147.13	4138.96	5098.37	5984.01	6847.8
807	-16.9846	-13.8445	-8.61553	-1.01106	80.0871	539.528	1282.85	2144.94	3155.38	4137.18	5095.3	5969.6	6857.05
807.5	-16.4952	-14.9339	-6.82322	-2.98318	80.1699	539.163	1277.26	2146	3157.74	4136.53	5097.74	5979.82	6847.74
808	-16.1825	-13.5112	-8.40185	-3.82252	80.3388	535.885	1274.46	2152.34	3156.99	4131.66	5096.8	5995.1	6849.14
808.5	-16.512	-14.4469	-8.70182	-2.9322	78.5797	536.188	1276.42	2160.58	3162.07	4137.49	5099.19	6001.02	6854.51
809	-17.7938	-13.865	-9.55714	-3.47216	78.6572	539.3	1279.9	2170.12	3160.83	4136.01	5102.08	6008.85	6853.84
809.5	-18.7661	-14.1417	-10.8059	-4.21517	78.2169	536.161	1275.44	2179.14	3157.32	4136.07	5102.79	6010.13	6856.05
810	-17.3157	-14.4553	-10.6165	-3.38728	78.8612	535.071	1268.87	2191.14	3155.1	4142.06	5093.72	6006.07	6844.65
810.5	-17.6055	-13.6618	-9.95768	-3.93462	82.2025	534.914	1271.81	2198.53	3155.89	4148.39	5083.23	6013.53	6838.89
811	-17.8391	-14.4438	-9.73806	-3.62242	82.5115	532.09	1275.16	2201.13	3150.3	4142.2	5083.86	6021.98	6824.2
811.5	-17.1806	-15.3647	-10.2722	-2.44944	80.6962	526.202	1276.61	2201.96	3145.41	4130.48	5087.02	6021.77	6817.71
812	-17.5124	-14.7452	-9.71017	-2.34438	81.6875	528.865	1281.47	2199.03	3148.42	4118.62	5093.19	6023.82	6821.51
812.5	-17.3579	-15.3825	-10.1361	-3.49914	80.5258	529.334	1282.5	2200.04	3143.46	4122.85	5088.66	6010.12	6822.1
813	-17.6214	-15.3856	-10.4908	-3.32155	81.4964	527.116	1282.37	2204.47	3135.17	4129.38	5078.25	6001.86	6821.03
813.5	-17.0989	-14.5014	-9.86736	-3.2116	82.5998	525.589	1279.74	2211.96	3130.23	4134.92	5072.26	5997.08	6826.71
814	-16.4494	-14.4472	-8.82917	-2.87097	82.0723	523.06	1282.3	2214.4	3134.88	4131.12	5072.01	5999.28	6833.6
814.5	-17.7211	-16.1515	-10.5184	-1.44993	81.3479	524.583	1286.31	2208.45	3147.4	4129.75	5081.92	6010.16	6838.28
815	-18.6016	-15.6235	-9.64827	-1.84616	82.6452	525.67	1283.55	2206.32	3145.89	4132.25	5087.21	6013.49	6844.75
815.5	-18.0161	-14.5373	-10.6519	-4.61024	84.2994	524.693	1285.22	2201.2	3141.99	4135.32	5097.12	5999.85	6836.06
816	-16.666	-16.861	-8.87526	-3.26603	82.0332	517.486	1285.16	2199.62	3135.97	4140.36	5103.81	6000.53	6820.52
816.5	-16.6565	-16.4505	-8.85131	-2.03391	81.7048	512.706	1281.3	2204.67	3134.65	4136.34	5104.21	6006.76	6821.64
817	-16.7535	-14.3617	-8.78821	-0.899403	80.9349	513.966	1279.23	2206.62	3135.3	4135.87	5109.11	6003.25	6833.21
817.5	-19.1482	-14.4773	-8.0638	-1.03895	80.7616	516.039	1280.29	2206.23	3141.89	4141.74	5113.01	5998.69	6825.27
818	-18.1905	-16.7257	-8.41013	-0.305722	82.9484	514.618	1282.15	2201.73	3147.08	4147.22	5113.15	6002.85	6828.55
818.5	-20.3337	-15.4692	-7.33261	-1.39418	82.0097	515.471	1284.81	2200.34	3154.63	4149.23	5111.74	6003.93	6837.17
819	-20.28	-15.7044	-7.90332	-2.89445	79.3151	519.978	1282.2	2202.62	3158.85	4153.66	5104.94	6001.57	6840.72
819.5	-18.5845	-16.5666	-8.50309	-2.07711	78.6426	520.004	1279.21	2203.67	3159.75	4160.28	5106.65	6005.79	6839.51
820	-19.0487	-15.0116	-7.98605	-1.39386	79.8829	520.558	1278.77	2207.63	3160.3	4162.03	5107.84	6013.32	6840.11
820.5	-18.1069	-14.0011	-8.31961	-1.71087	80.5621	516.327	1274.09	2208.4	3159.45	4152.35	5110.2	6009.43	6824.72
821	-16.9777	-14.3035	-7.99202	-1.29974	81.291	514.649	1265.39	2211.15	3161.46	4133.75	5111.24	6004.77	6815.47
821.5	-16.7949	-14.4416	-7.55529	-0.830153	81.2602	512.571	1258.09	2211.65	3166.38	4133.23	5118.56	6001.78	6821.11
822	-17.4073	-15.6161	-7.9525	-0.651104	80.2985	511.371	1258.38	2215.44	3166.18	4143.69	5115.75	6001.07	6835.29
822.5	-17.2706	-14.4275	-7.48802	-0.0443733	80.7756	514.657	1259.37	2212.84	3167.15	4143.99	5105.59	5998.93	6848.62
823	-16.5344	-15.1453	-6.9452	-0.73138	82.2592	515.915	1262.69	2210.76	3163.04	4138.75	5106.18	5997.53	6857.51
823.5	-17.7645	-15.5895	-7.79386	-2.16441	82.082	517.417	1263.39	2207.49	3154.32	4136.13	5111.36	6004.24	6857.2
824	-18.4195	-15.7559	-8.50956	-2.77854	82.0974	514.567	1260.38	2201.74	3149.71	4140.29	5113.51	6012.27	6859.23
824.5	-18.6557	-14.0497	-8.74962	-2.25659	82.6312	515.079	1264.1	2195.38	3142.73	4152.99	5113.23	6006.79	6850.38
825	-16.8884	-14.4018	-8.48411	-2.33678	83.9208	516.243	1271.44	2196.56	3130.58	4163.69	5103.03	6006.53	6835.65
825.5	-16.8775	-15.2402	-9.2143	-2.89813	85.3195	520.09	1273.99	2200.99	3128.27	4161.48	5092.67	6003.07	6825.17
826	-15.9741	-14.7395	-7.60485	-1.20757	85.2131	521.274	1277.2	2199.75	3127.21	4154.1	5090.13	5996.89	6819.92
826.5	-16.9306	-14.9602	-8.53097	-2.61308	83.997	520.639	1276.78	2201.36	3120.58	4145.48	5093.07	6001.71	6822.8
827	-16.8338	-13.883	-10.513	-3.19558	82.2207	521.376	1277.84	2204.09	3117.95	4155.65	5096.28	6003.89	6825.23
827.5	-17.067	-13.0037	-9.92331	-2.65861	82.6962	521.326	1281.69	2200.45	3123.96	4160.8	5112.75	5998.72	6818.67
828	-18.4168	-14.2947	-10.3413	-2.74724	83.6778	521.703	1283.53	2197.62	3127.78	4156.25	5127.08	5989.58	6810.34
828.5	-17.7651	-14.1608	-9.66716	-3.13507	83.291	522.767	1284.55	2203.55	3121.58	4158.84	5129.8	5992.56	6816.36
829	-18.1818	-15.5029	-9.19922	-3.17981	83.8731	523.983	1284.99	2208.72	3124.99	4173.05	5125.05	5998.85	6827.33
829.5	-17.3294	-15.6921	-8.87826	-2.20735	83.1004	524.695	1290.54	2212.49	3131.55	4179.36	5120.08	5997.45	6823.75
830	-17.3141	-14.4731	-9.52566	-0.778412	81.9957	519.182	1287.85	2213.11	3136.44	4174.18	5125.72	5994.66	6832.07
830.5	-18.8475	-15.2265	-8.99416	-1.55091	82.1983	513.791	1276.01	2214.57	3145.81	4169.91	5129.79	6001.85	6840.18
831	-18.1232	-15.4086	-8.8265	-1.91735	84.1202	514.122	1272.41	2211.14	3153.1	4166.93	5131.86	6007.73	6856.94
831.5	-19.3958	-15.5278	-8.79479	-1.35836	84.7122	510.458	1274.19	2207.22	3163.76	4169.02	5126.2	6003.12	6863.14
832	-18.9806	-14.3143	-9.33555	-2.12841	83.983	513.254	1277.74	2209.45	3160.27	4174.44	5116.49	6008.6	6860.55
832.5	-18.1517	-14.2644	-8.9299	-1.30792	83.9942	514.548	1285.9	2210.26	3155.65	4181.2	5115.48	6017.82	6851.37
833	-17.9043	-15.5468	-9.18305	-2.23241	81.3971	513.703	1289.34	2207.54	3155.81	4184.51	5108.9	6019.82	6845.17
833.5	-19.1303	-13.7609	-9.24793	-0.414697	81.0147	512.534	1283.28	2209.06	3160.93	4190.1	5105.54	6021.93	6845.05
834	-20.0538	-13.3209	-9.013	-0.053575	83.2817	513.79	1283.11	2209.06	3163.36	4191.28	5103.49	6021.29	6847.84
834.5	-19.7112	-15.6434	-9.73657	-0.766131	84.7724	512.614	1286.19	2211.86	3162.24	4186.04	5109.83	6019.39	6861.56
835	-18.8897	-15.4205	-9.07282	-1.1706	83.9899	511.851	1290.68	2213.28	3160.7	4189.72	5116.68	6015.64	6879.39
835.5	-17.7852	-13.3352	-9.66051	-0.416051	83.6183	511.108	1291.18	2214.24	3159.99	4185.5	5124.7	6018.05	6887.07
836	-19.3438	-13.6144	-9.29785	-0.461767	84.2461	513.272	1287.75	2214.27	3160.22	4178.44	5123.29	6011.36	6894.86
836.5	-20.0023	-12.8956	-7.86618	0.798244	83.2532	516.319	1279.48	2206.3	3162.09	4184.86	5119.1	6001.61	6908.63
837	-19.0368	-14.5726	-7.56923	0.0122135	81.2959	521.706	1271	2204.29	3162.02	4187.45	5118.25	5993.79	6913.53
837.5	-17.6268	-14.9253	-8.4063	0.0204222	81.8374	525.76	1268.82	2205.61	3163.11	4202.91	5119.51	5988.21	6910.55
838	-17.8684	-14.8055	-9.06778	-0.464363	85.3593	526.562	1275.85	2203.07	3157.41	4223.71	5120.77	5988.12	6908.62
838.5	-16.4788	-14.799	-8.93771	-1.32113	84.1535	520.921	1284.15	2191.24	3162.7	4223.49	5111.98	5991.25	6900.55
839	-16.6345	-12.8674	-9.61576	-1.26615	83.2383	519.036	1281.99	2185.11	3174.42	4217.25	5100.97	6002	6890.02
839.5	-16.0167	-14.0842	-7.54557	-0.436873	82.158	519.59	1282.73	2180.88	3188.67	4220.43	5094.39	6001.46	6888.87
840	-18.3193	-13.5488	-7.5984	-1.52484	81.1117	520.895	1277.72	2183.85	3194.11	4223.33	5086.08	5999.51	6892.44
840.5	-17.9366	-13.5417	-8.60263	-1.24067	81.2964	521.431	1274.24	2191.94	3197.88	4225.06	5089.49	5994.91	6896.79
841	-15.7083	-14.3434	-10.5154	-0.872507	81.154	516.362	1272.34	2195.02	3200.8	4228.76	5097.15	5975.91	6898.93
841.5	-16.8966	-13.3712	-9.66832	-1.25743	83.6208	515.485	1273.56	2194.35	3198.3	4228.28	5093.03	5964.51	6892.52
842	-17.0872	-13.4865	-9.54908	-2.54091	82.7665	515.938	1273.24	2194.3	3202.84	4225.96	5089.01	5953.86	6883.01
842.5	-17.7887	-13.9705	-8.28413	-1.73708	81.6056	514.125	1280.13	2196.37	3204.51	4225.31	5094.86	5954	6881.71
843	-17.5757	-14.1463	-9.81374	-1.50849	82.9314	515.246	1286.38	2201.12	3204.7	4224.38	5103.67	5954.94	6883.5
843.5	-17.6428	-13.4185	-10.4036	-0.356251	85.3793	516.712	1288.52	2203.3	3203.03	4211.19	5114.17	5958.78	6877.37
844	-17.1125	-13.1349	-10.4939	-0.235303	88.2706	517.892	1289.83	2198.21	3204.79	4205.38	5108.7	5968.21	6890.23
844.5	-17.1064	-14.3569	-9.81504	-2.10289	87.8553	515.895	1290.57	2194.5	3199.04	4207.09	5105.48	5971.98	6896.49
845	-17.9004	-14.3214	-8.80957	-1.17131	88.315	517.517	1287.32	2196.12	3190.05	4212.79	5103.4	5977.57	6898.57
845.5	-18.3564	-13.5415	-9.27137	-1.86123	84.3304	520.357	1285.26	2195.98	3176.08	4214.38	5098.38	5982	6906.44
846	-17.4755	-13.455	-9.59385	-1.06416	85.0577	520.308	1283.4	2199.15	3173.42	4212.77	5088.71	5987.15	6907.36
846.5	-17.8599	-14.2026	-10.7169	-1.31614	86.1649	515.985	1280.56	2204.29	3179.8	4221.26	5090.89	5994.67	6895.77
847	-18.7356	-13.3538	-8.43498	-0.979575	87.0385	512.906	1279.92	2201.5	3182.24	4218.23	5087.96	5998.05	6892.07
847.5	-16.4526	-14.4168	-9.35843	-1.08546	88.5653	516.183	1279.09	2206.5	3187.57	4219.61	5098.27	5992.14	6900.8
848	-17.4069	-14.1515	-8.88146	-1.4306	87.4908	517.611	1280.34	2221.26	3185.12	4221.86	5111.49	5978.6	6906.79
848.5	-18.7789	-14.8511	-8.76375	-2.02241	87.4932	515.605	1283.42	2235.86	3180.96	4210.22	5111.5	5976.8	6908.7
849	-19.2368	-16.1188	-7.8163	-0.388054	87.407	512.597	1284.35	2229.5	3175.89	4205.97	5117.31	5978.33	6917.93
849.5	-18.1257	-15.6318	-7.59775	-0.88302	89.4265	511.176	1281.85	2225.21	3182.97	4203.91	5117.07	5973.5	6920.66
850	-18.52	-14.3266	-7.24012	-0.131735	85.8541	516.289	1279.46	2223.93	3183.44	4202.59	5114.85	5968.22	6916.32
850.5	-18.7349	-15.4232	-7.52281	-0.0860644	84.0363	517.151	1279.59	2224.49	3179.86	4202.95	5120.27	5977.21	6899.66
851	-19.4891	-14.6427	-8.0914	-0.21712	85.8607	514.813	1285.01	2216.18	3180.71	4206.81	5120.23	5979.08	6891.75
851.5	-18.8353	-13.9299	-8.5575	-0.408724	85.1	511.742	1282.8	2214.18	3183.61	4212.27	5116.69	5969.8	6883.12
852	-19.2444	-13.9047	-7.64636	1.1272	87.8742	512.187	1277.53	2215.54	3192.47	4213.74	5101.63	5971.2	6875.63
852.5	-19.3721	-13.9156	-7.35126	1.29709	89.174	513.835	1276.63	2216.44	3192.98	4211.52	5097.95	5976.69	6867.13
853	-17.7925	-15.7233	-7.80024	-0.0732516	89.7255	515.986	1272.2	2210.65	3191.74	4203.8	5095.93	5986.13	6869.31
853.5	-16.9023	-13.6893	-8.30226	-0.0604033	90.3884	515.858	1275.68	2206.43	3191.44	4201.44	5092.2	5982.35	6874.4
854	-17.7269	-14.9756	-7.47387	2.52621	86.0314	517.722	1283.93	2199.92	3192.62	4203.69	5098.66	5980.15	6866.68
854.5	-19.4142	-15.2085	-9.18589	2.10795	88.1823	521.606	1288.15	2196.15	3195.51	4210.27	5095.52	5981.65	6867.5
855	-19.695	-14.4434	-7.7045	1.90185	89.3598	522.769	1287.27	2196.09	3191.34	4217.57	5090.42	5981.34	6863.11
855.5	-18.489	-14.9326	-8.20955	-0.172735	86.8368	525.691	1289.45	2198.53	3188.19	4225.43	5078.23	5971.98	6854.35
856	-17.3374	-14.2347	-7.40453	0.86148	88.8343	526.778	1290.33	2195.21	3188.24	4221.62	5066.32	5965.09	6853.78
856.5	-17.7159	-14.6018	-7.68153	0.0848768	87.902	523.634	1284.28	2192.56	3193.38	4214.42	5073.13	5973.54	6855.54
857	-17.2312	-14.5792	-7.9254	-0.708431	84.1428	524.404	1283.74	2196.94	3194.38	4206.71	5077.99	5986.12	6857.7
857.5	-18.1253	-13.1826	-8.8798	-0.556338	83.7045	525.528	1285.27	2198.88	3193.82	4200	5073.42	5985.23	6862.68
858	-19.5801	-13.425	-8.65221	-1.76606	84.7333	530.473	1285.2	2194.65	3186.98	4198.73	5065.9	5995.54	6869.1
858.5	-16.7762	-14.4848	-9.02051	-1.75261	85.4167	532.667	1281.62	2194.33	3179.15	4194.05	5066.36	6002.67	6862.14
859	-16.7253	-14.9241	-8.99454	-0.803893	83.1258	529.736	1283.5	2191.53	3180.59	4190.13	5069.51	5994.57	6851.38
859.5	-16.4833	-12.6101	-9.27396	0.231767	82.6048	528.657	1288.68	2199.5	3191.44	4193.39	5076.73	5993.16	6840.7
860	-18.4118	-14.2107	-9.38347	1.61347	83.023	526.191	1289.6	2205.05	3197.71	4199	5071.86	5996.95	6828.58
860.5	-17.3667	-15.8719	-8.61527	0.464697	83.9345	527.657	1289.31	2204.79	3197.38	4200.16	5065.76	6003.29	6829.41
861	-17.6397	-15.9116	-9.4324	0.714537	82.2217	528.314	1294.19	2202.57	3197.83	4205.76	5063.86	6004.57	6831.51
861.5	-17.7946	-14.4956	-9.10243	0.593202	80.3544	528.082	1298.17	2202.68	3200.93	4211.11	5062.26	6002.53	6842.8
862	-15.7932	-15.1416	-8.51534	0.927008	79.3993	529.846	1297.49	2201.64	3198.31	4209.06	5066.4	6000.05	6844.24
862.5	-16.5949	-16.2724	-9.13753	0.428387	78.7211	529.828	1294.12	2203	3188.22	4203.95	5069.46	6004.77	6835.12
863	-16.9176	-15.1982	-9.14571	0.383879	79.1186	530.305	1293.27	2201.54	3178.5	4191.56	5070.63	6002.61	6831.46
863.5	-17.7029	-15.6054	-8.1695	0.661187	77.9468	533.025	1299.17	2214.51	3183.12	4192.92	5077.77	5990.84	6842.54
864	-17.7356	-16.0018	-8.86644	-1.50223	79.7248	534.942	1297.08	2222.57	3186.87	4191.99	5083.18	5982.56	6847.88
864.5	-17.8681	-16.7218	-9.11432	-1.13824	80.8132	538.203	1290.07	2223.92	3189.3	4189.37	5076.34	5977.05	6853.63
865	-17.7881	-16.0373	-8.87829	-0.203986	81.8081	539.768	1280.12	2218.15	3191.87	4186.71	5075.05	5975.02	6848.62
865.5	-17.4165	-14.7681	-9.11008	-1.19269	82.1801	539.36	1279.07	2212.25	3190.21	4192.18	5078.88	5965.71	6846.67
866	-19.0472	-14.7276	-8.40829	-1.88521	81.3159	538.893	1276.39	2206.53	3189.91	4197.28	5080.02	5960.33	6838.62
866.5	-19.7115	-15.589	-9.29091	-0.904378	81.0788	539.389	1275.71	2204.01	3189.12	4203.88	5087.56	5959.2	6839.72
867	-18.1544	-14.0426	-7.74465	-1.33908	81.1681	541.001	1276.36	2211.11	3199.87	4212.09	5092.32	5957.28	6835.07
867.5	-18.4035	-14.6405	-7.54569	-1.14405	81.7423	543.374	1277.6	2221.14	3202.12	4219.71	5085.89	5957.69	6840.22
868	-18.0286	-16.131	-8.70367	-0.524558	79.8009	539.873	1283.63	2233.54	3200.75	4228.85	5073.06	5965.88	6841.21
868.5	-17.8169	-14.6337	-6.84963	-0.363196	78.468	538.919	1286.85	2242.07	3203.85	4230.78	5070.15	5977.41	6842.52
869	-18.0022	-15.2791	-6.34365	0.0712139	78.4503	539.143	1288.5	2241.72	3207.64	4230.65	5065.07	5984.77	6852.17
869.5	-18.065	-14.2811	-9.42977	1.11663	80.1357	540.768	1289.02	2230.34	3208.58	4232.07	5064.55	5986.5	6853.42
870	-19.9137	-14.1095	-9.47127	1.27425	80.7022	542.103	1298.34	2216.08	3204.83	4229.5	5070.44	5980.54	6856.53
870.5	-17.4897	-14.6967	-8.47764	1.27365	80.702	542.385	1297.12	2214.71	3204.61	4228.05	5087.6	5973.91	6858.51
871	-18.0031	-15.3733	-8.49535	-1.78197	80.293	540.874	1300.81	2217.58	3197.95	4223.02	5095.69	5964.1	6858.55
871.5	-17.3917	-15.1182	-8.41453	-1.83682	79.6332	541.552	1301.57	2216.08	3200.59	4222.66	5095.43	5961.93	6870.6
872	-17.8428	-13.9947	-8.53731	-1.62677	81.4852	541.299	1294.34	2213.95	3202.79	4225.16	5091.44	5972.01	6881.32
872.5	-17.5263	-12.6395	-9.2111	-0.725404	81.6315	537.965	1288.02	2208.91	3201.4	4225.03	5092.58	5979.21	6873.05
873	-17.1761	-13.7236	-7.82466	-2.12367	81.3575	537.272	1284.25	2201.37	3199.61	4215.59	5103.3	5973	6859
873.5	-18.2061	-14.7354	-7.92881	-1.33328	81.2851	531.724	1284.53	2202.5	3196.46	4215.77	5111.55	5967.92	6852.11
874	-16.1659	-12.2573	-8.79883	-0.780026	81.0415	532.905	1283.36	2201.67	3192.35	4218.79	5113.33	5962	6853.6
874.5	-16.5481	-13.0968	-9.58243	-0.0628992	79.8491	535.003	1287.83	2198.01	3188.99	4224.6	5119.97	5952.79	6854.34
875	-16.7554	-14.279	-7.74349	-2.39245	80.9321	535.364	1292.25	2202.34	3186.33	4228.35	5117.96	5948.33	6849.24
875.5	-19.6936	-13.5518	-7.95449	-1.59912	80.3118	535.945	1291.34	2203.04	3178.81	4228.76	5111.04	5939.61	6849.53
876	-18.5549	-12.8293	-9.07529	-1.61058	79.261	536.11	1295.99	2202.89	3180.71	4229.16	5105.93	5931.74	6850.41
876.5	-17.4293	-12.2203	-9.8596	-3.62156	79.3161	534.206	1302.87	2200.05	3182.79	4218.66	5109.33	5938.96	6856.8
877	-17.091	-13.5235	-9.11988	-3.08001	77.7075	532.714	1304.27	2199.69	3183.22	4221.97	5106.96	5948.8	6852.33
877.5	-16.7609	-14.4727	-8.17525	-3.79691	77.3472	533.345	1300.44	2203.69	3185.51	4230.55	5108.04	5953.98	6839.4
878	-17.1023	-13.9217	-8.76276	-1.95191	75.2058	528.922	1295.59	2212.25	3193.29	4230.79	5110.95	5962.35	6840.53
878.5	-18.0735	-14.7717	-10.1823	-1.27806	76.9895	519.721	1290.2	2210.06	3201.64	4234.71	5113.89	5963.84	6851.09
879	-16.9626	-13.715	-9.04027	-1.14507	77.0016	517.009	1284.89	2208.85	3208.82	4233.47	5120.1	5960.17	6859.45
879.5	-17.7375	-14.1301	-9.33702	-1.03253	78.4961	521.184	1285.88	2210.35	3217.1	4231.1	5115.91	5950.93	6859.02
880	-18.0184	-13.7594	-8.32359	-0.447667	79.4943	521.138	1285.81	2212.63	3226.31	4230.76	5111.36	5938.71	6867.73
880.5	-17.4541	-14.3455	-9.08476	-0.72828	78.4837	519.536	1287.99	2211.74	3223.02	4233.43	5114.76	5926.42	6869.79
881	-18.1567	-14.8321	-11.4204	-1.50726	78.8008	520.725	1290.78	2203.29	3217.84	4234.38	5113.92	5916.88	6871.98
881.5	-16.4544	-15.6237	-9.78951	-1.86505	79.4657	522.807	1291.07	2202.81	3226.59	4231.76	5106.44	5918.2	6874.95
882	-17.3933	-14.9461	-9.50957	-1.01524	80.0998	519.98	1293.11	2197.83	3231.88	4226.06	5103.64	5923.33	6869.07
882.5	-18.2124	-16.4283	-7.8682	-1.61845	81.0675	517.593	1295.45	2194.39	3232.16	4225.68	5095.95	5924.79	6855.74
883	-19.9238	-16.5622	-7.53705	-1.34974	81.4988	520.222	1297.49	2195.84	3225.91	4227.21	5097.72	5923.52	6851.21
883.5	-18.5157	-15.4618	-7.30398	-2.22179	81.5715	524.062	1296.59	2197.31	3221.93	4222.73	5097.52	5921.53	6853.75
884	-16.4206	-14.7849	-8.33874	-1.71955	80.8737	526.879	1294.76	2199.68	3221.41	4218.84	5102.04	5920.79	6862.54
884.5	-18.1948	-14.4404	-9.60173	-0.74636	82.0058	530.407	1293.03	2204.67	3218.15	4207.02	5103.22	5919.41	6863.41
885	-19.9719	-14.5171	-9.12619	0.924127	78.6044	531.558	1297.05	2209.27	3213.25	4200.92	5099.56	5913.35	6859.31
885.5	-18.6131	-13.9493	-8.43983	0.418671	80.452	527.601	1303.13	2207.51	3217.13	4200.99	5096.98	5918.46	6844.19
886	-19.3505	-14.3167	-8.99695	-0.346928	79.634	524.581	1297.83	2204.47	3222.79	4200.63	5098.14	5927.47	6833.96
886.5	-18.6081	-14.7777	-9.7157	1.09488	79.9545	522.646	1289.02	2200.83	3221.19	4199.36	5103.44	5933.57	6852.94
887	-19.2629	-14.2913	-8.7336	0.33637	82.8382	521.464	1284.78	2199.69	3219.41	4209.76	5092.22	5933.33	6869.05
887.5	-18.7289	-14.2229	-9.77976	1.24275	83.3336	520.591	1288.43	2200.92	3220.72	4218.48	5080.82	5923.29	6867.88
888	-19.4567	-14.9292	-7.74692	0.571531	79.8657	521.457	1294.84	2203.53	3221.53	4207.91	5079.66	5920.05	6864.06
888.5	-18.0849	-16.2634	-8.04629	-1.6718	79.8596	519.456	1296.26	2200.24	3212.51	4203.83	5085.64	5930.23	6862.47
889	-17.2643	-15.2679	-8.95548	-0.792067	80.0611	520.919	1298.81	2199.32	3211.3	4210.82	5086.89	5931.58	6860.37
889.5	-18.0861	-13.8533	-9.42038	0.481599	79.4655	517.112	1303.81	2200.57	3218.81	4212.34	5084.3	5943.96	6852.79
890	-18.4514	-14.2423	-7.74343	-1.21029	80.3031	512.324	1308.27	2204.89	3212.66	4214.69	5089.02	5944.69	6849.26
890.5	-17.3581	-13.4241	-8.99378	-1.87958	78.2619	514.251	1311.98	2205.7	3214.49	4214.64	5095.34	5938.4	6853.29
891	-18.8532	-13.2149	-8.95154	-3.09988	80.011	514.63	1307.95	2203.25	3220.54	4201.74	5098.96	5935.27	6861.19
891.5	-18.6905	-14.4446	-7.69851	-4.20776	79.3058	519.563	1311.52	2202.39	3223.59	4201.53	5104.48	5935.12	6855.82
892	-18.992	-14.3934	-8.39677	-4.45302	81.912	525.477	1314.46	2193.32	3221.94	4207.83	5094.92	5942.55	6863.35
892.5	-19.5056	-13.3092	-10.1976	-3.37448	85.8065	531.872	1316.65	2193.31	3219.52	4206.62	5084.37	5953.91	6867.01
893	-18.6774	-13.8356	-9.56265	-2.20592	85.4365	532.539	1315	2193.27	3222.77	4208.93	5079.74	5948.82	6863.92
893.5	-17.4215	-14.5804	-9.69468	-2.2097	85.0868	530.457	1309.79	2195.5	3219.24	4209.79	5086.96	5941.83	6859.28
894	-16.943	-14.8279	-10.3165	-3.39972	82.8132	526.189	1305.45	2200.4	3218.05	4216.71	5094.07	5944.22	6846.64
894.5	-17.5819	-15.6462	-10.0995	-2.73178	84.5963	523.398	1305.43	2205.19	3212.51	4224.67	5098.92	5948.63	6842.37
895	-18.4641	-14.9347	-10.4758	-2.3613	85.0226	522.405	1304.69	2212.94	3215.63	4218.27	5101.92	5950.58	6840.76
895.5	-17.8043	-15.3076	-8.86733	-2.85458	85.9327	525.733	1296.87	2211.62	3217.8	4208.71	5105.57	5949.29	6837.66
896	-17.7178	-14.3283	-9.01352	-3.93406	83.8948	524.351	1295.71	2206.93	3226.47	4212.94	5109.25	5954.25	6824.98
896.5	-18.7697	-15.6853	-8.4457	-2.83494	80.3005	520.55	1298.48	2205.27	3224.66	4213.97	5105.32	5968.15	6823.83
897	-18.3244	-15.9993	-7.42446	-1.15393	78.9904	518.108	1296.15	2199.7	3220.11	4215.46	5101.43	5975.62	6825.73
897.5	-18.1942	-15.8522	-8.97217	-1.5982	80.4212	516.908	1292.79	2197.57	3220.42	4217.81	5088.6	5979.25	6822.31
898	-17.3618	-14.341	-10.0399	-0.39889	79.2408	518.255	1287.49	2189.89	3217.46	4220.95	5079.09	5976.31	6823.07
898.5	-17.8606	-15.9078	-8.52534	-2.40887	79.9123	519.026	1281.21	2186.32	3217.24	4220.76	5077.63	5976.17	6816.7
899	-18.6319	-15.4943	-10.3179	-1.73717	79.4937	518.456	1282.24	2187.58	3223.98	4218.39	5083.06	5987.32	6813.51
899.5	-19.0371	-14.0833	-9.46922	-2.10023	78.281	522.348	1289.87	2184.99	3226.13	4220.81	5091.19	5995.12	6813.05
900	-18.3689	-14.1451	-10.3273	-1.90788	77.0569	524.505	1293.82	2174.32	3216.38	4223.36	5099.53	5986.33	6821.33
900.5	-19.1067	-14.7413	-9.08852	-1.31357	75.3139	523.6	1297.97	2173.32	3214.88	4225.14	5112.53	5976.04	6830.83
901	-19.8298	-14.7344	-7.71819	-1.11966	77.6611	521.386	1296.56	2176.56	3226.22	4228.97	5110.4	5972.86	6837.96
901.5	-17.8373	-15.0197	-8.14376	-1.20879	77.8073	515.575	1291.61	2175.88	3231.72	4234.68	5109.23	5968.85	6832.51
902	-17.7458	-16.3683	-9.2064	-2.09772	80.5827	514.57	1286.66	2184.33	3231.49	4231.18	5127.51	5968.09	6826.88
902.5	-19.2603	-14.8661	-8.22902	-1.14087	82.1191	516.634	1290.03	2185.62	3227.17	4230.82	5144.77	5966.39	6825.96
903	-20.2854	-14.8228	-7.18556	-0.19682	82.2929	515.55	1288	2183.98	3222.92	4231.17	5147.68	5963.37	6835.23
903.5	-20.2346	-16.0941	-8.78261	-0.58877	80.0019	516.967	1285.81	2183.69	3218.95	4232.75	5145.82	5957.17	6835.05
904	-19.0077	-14.5017	-8.41883	-2.81183	80.3359	521.218	1294	2180.12	3224.17	4234.5	5141.21	5960.31	6825.32
904.5	-16.5032	-13.5323	-8.66462	-1.30256	80.9936	526.962	1299.33	2178.88	3231.8	4235.03	5130.91	5963.67	6828.3
905	-17.0957	-13.6337	-8.78803	-0.690774	82.6656	526.727	1295.72	2171.02	3233.03	4240.53	5116.74	5958.14	6832.74
905.5	-18.773	-12.4577	-8.66762	-0.25849	82.6654	523.461	1288.18	2168.84	3235.68	4238.24	5109.4	5959.47	6841.69
906	-18.5016	-12.3185	-8.36008	-1.07748	83.2216	523.985	1286.78	2166.11	3244.96	4236.91	5105.84	5954.26	6845.72
906.5	-16.8806	-13.8906	-8.89832	-2.15037	83.5981	526.055	1289.56	2163.47	3249.09	4245.66	5112.74	5946.21	6852.26
907	-17.1284	-14.9484	-9.10766	-3.39231	83.9227	526.056	1292.28	2157.94	3238.88	4246.72	5117.13	5940.76	6853.12
907.5	-17.5602	-13.5211	-9.73917	-2.87376	82.3271	527.305	1287.94	2154.57	3235.47	4251.95	5125.68	5946.36	6869.12
908	-16.6905	-12.6399	-9.47286	-3.0408	82.2322	527.595	1286.35	2156.37	3237.31	4254.23	5130.9	5951.72	6868.89
908.5	-17.2574	-13.1815	-8.56237	-3.26544	81.7295	525.199	1294.71	2156.35	3241.89	4259.15	5139.77	5961.18	6860.08
909	-18.1077	-13.8699	-9.099	-4.29734	83.6228	523.824	1301.45	2155.3	3240.59	4254.27	5155.43	5957.76	6859.9
909.5	-17.8757	-13.0255	-9.82546	-3.46378	84.0781	520.043	1303.5	2154.63	3232.02	4249.64	5160.01	5955.68	6849.88
910	-17.8162	-13.3933	-9.74076	-3.81915	84.8603	517.097	1304.65	2164.16	3228.9	4245.11	5150.79	5961.07	6847.09
910.5	-18.1823	-14.7809	-9.09804	-2.02352	83.8768	515.058	1303.1	2171.26	3230.03	4228.44	5144.94	5964.99	6854.32
911	-16.859	-13.149	-8.46164	-2.37753	85.2999	518.774	1298.71	2166.08	3234.73	4219.53	5141.79	5964.42	6853.38
911.5	-18.4267	-13.174	-11.3636	-3.23855	86.2023	520.882	1297.75	2162.56	3229.4	4222.78	5137.56	5963.2	6846.58
912	-18.2822	-14.1962	-9.89934	-2.96513	86.4245	519.584	1295.49	2164.63	3223.5	4221.12	5137.64	5965.29	6844.69
912.5	-18.9465	-14.2898	-10.0092	-2.46273	85.4468	524.725	1295.69	2161.1	3226.69	4218.63	5137.88	5971.47	6850.65
913	-18.4618	-14.634	-9.18609	-3.33049	86.3483	527.072	1301.81	2168.07	3220.82	4210.45	5138.11	5974.98	6844.78
913.5	-17.578	-14.6987	-9.15823	-2.61109	86.7933	527.122	1310.91	2171.97	3219.04	4197.86	5137.54	5970.13	6840.44
914	-17.139	-14.2988	-9.08051	-1.0274	86.4123	526.662	1314.91	2175.46	3220.67	4201.27	5144.14	5975.47	6842.92
914.5	-19.5544	-12.6711	-8.51796	0.206413	84.7287	525.675	1308.08	2177.8	3221.48	4216.71	5137.87	5982.92	6837.47
915	-19.3545	-14.1813	-9.74014	-1.87489	84.0479	522.906	1302.83	2184.14	3216.25	4229.18	5137.14	5974.44	6843.15
915.5	-17.6777	-15.6925	-8.13698	-1.4289	84.7036	522.91	1302.11	2182.29	3211.52	4231.02	5140.85	5982.08	6841.71
916	-19.1639	-15.0037	-8.78631	-2.17349	84.6951	521.99	1302.17	2180.86	3216.09	4236.33	5127.86	5987.79	6839.84
916.5	-20.5304	-15.1576	-9.02849	-0.59025	83.1112	518.355	1297.64	2176.84	3217.97	4234.74	5118.54	5976.54	6840.8
917	-20.7871	-14.0019	-8.12404	-0.731963	82.0709	515.032	1292.54	2179.98	3212.42	4231.86	5113.74	5966.31	6838.79
917.5	-19.832	-15.283	-8.42325	-2.80853	84.1093	516.359	1292.35	2181	3205.12	4228.57	5111.03	5949.08	6842.13
918	-18.7375	-14.7647	-7.80504	-2.29645	84.1306	517.101	1288.13	2178.28	3204.41	4228.57	5117.98	5941.16	6849.51
918.5	-18.8771	-14.59	-8.78222	-1.10758	85.7528	520.273	1288.25	2180.87	3207.3	4226.01	5120.37	5949.31	6852.8
919	-19.9101	-15.5734	-7.61695	-2.30117	85.1668	522.727	1290.59	2176.24	3212.95	4233.05	5130.94	5960.52	6848.82
919.5	-19.8811	-15.3368	-9.29206	-0.318445	84.3625	523.368	1292.04	2173.57	3223	4228.92	5140.2	5957.04	6841.57
920	-19.7779	-13.6064	-9.06878	-0.529623	82.9643	523.094	1291.47	2176.4	3221.34	4224.3	5132.59	5948.96	6833.43
920.5	-17.8956	-14.2703	-7.36278	-1.44195	85.0808	521.755	1293.94	2176.8	3223.87	4227.91	5122.07	5950.6	6835.54
921	-19.6321	-14.0712	-7.46557	-0.811382	86.6414	523.63	1294.58	2175.17	3231.77	4227.6	5114.47	5955.09	6841.31
921.5	-18.1809	-13.1675	-7.88969	-0.545257	88.7285	519.606	1296.73	2177.18	3232.19	4231.38	5096.62	5959.57	6854.37
922	-17.6055	-13.9292	-8.60961	-1.50788	88.3753	520.104	1296.88	2187.05	3235.96	4226.12	5082.6	5967.33	6864.11
922.5	-18.8746	-13.7984	-8.03206	-2.18094	85.6548	523.319	1293.59	2188.51	3229.74	4216.57	5081.36	5960.68	6861.84
923	-19.6078	-13.3466	-6.93921	-1.13329	85.9922	520.378	1291.27	2185.16	3228.79	4203.33	5090.48	5959.63	6855.02
923.5	-18.0673	-13.84	-7.9031	-1.33576	86.6772	519.699	1301.34	2185.27	3231.24	4207.76	5088.69	5950.7	6858.45
924	-17.5776	-13.7107	-8.53989	-1.37843	87.1325	519.201	1309.69	2181.8	3228.33	4203.44	5091.77	5940.62	6852.19
924.5	-16.8557	-12.1435	-7.4183	-2.65557	85.561	520.898	1303.91	2185.03	3230.54	4198.26	5095.07	5953.1	6849.69
925	-17.8959	-12.9845	-8.31154	-1.29714	85.2291	520.232	1289.84	2193.01	3225.56	4205.64	5097.34	5961.93	6857.69
925.5	-18.0001	-15.4641	-7.5013	-3.49103	85.0223	521.34	1285.89	2202.81	3221.92	4204.23	5093.94	5957.74	6861.66
926	-18.2362	-13.3079	-7.64378	-2.55254	82.8026	522.963	1285.52	2201.32	3224.84	4199.74	5081.13	5951.77	6867.35
926.5	-19.2235	-12.3782	-8.37765	-2.13483	83.8744	525.424	1285.89	2194.72	3220.93	4196.38	5077.84	5958.4	6869.36
927	-18.2915	-11.7803	-9.02993	-1.93055	83.4088	523.309	1285.47	2198.94	3216.01	4191.67	5084.98	5973.33	6868.51
927.5	-17.2419	-14.0222	-9.35522	-1.90814	81.3011	521.839	1291.41	2199.86	3217.9	4193.71	5089	5977.25	6864.71
928	-18.0085	-12.3813	-8.09298	-2.71637	80.08	520.833	1293.19	2204.41	3214.73	4187.53	5096.48	5980.66	6866.97
928.5	-19.6617	-13.815	-8.23893	-0.744614	81.9645	519.323	1290.96	2206.72	3217.03	4183.35	5092.68	5984.94	6863.63
929	-18.2696	-13.7721	-9.90628	-0.818676	85.2406	520.488	1293.62	2208.02	3222.88	4171.47	5081.99	5982.46	6867.9
929.5	-18.7048	-14.5782	-9.60774	-2.88158	84.947	525.193	1292.38	2203.63	3229.61	4155.41	5089.99	5977.93	6871.62
930	-18.9524	-14.0552	-10.9791	-2.70093	82.883	528.053	1292.2	2202.93	3236.21	4148.5	5097.36	5979.41	6880.6
930.5	-18.3487	-14.3121	-9.91687	-2.01657	82.8429	528.842	1299.01	2199.77	3235.81	4148.32	5100.31	5973.17	6888.16
931	-18.1345	-15.1468	-9.34876	-3.74569	85.6881	528.78	1300.18	2196.48	3227.23	4148.4	5100.9	5969.48	6896.65
931.5	-19.0689	-14.9444	-9.04705	-1.38508	83.9679	532.337	1298.6	2195.34	3221.6	4148.01	5102.25	5976.78	6895.38
932	-18.2583	-14.426	-8.83039	-0.775258	82.0737	533.82	1296.61	2199.77	3223.6	4146.02	5097.69	5980.91	6884.42
932.5	-18.8699	-16.2031	-9.31248	-0.387279	82.3861	533.606	1296.53	2197.37	3214.2	4137.55	5091.77	5968.39	6886.32
933	-19.736	-14.4957	-7.27971	-1.43085	81.524	535.914	1298.12	2196.6	3207.22	4134.56	5090.74	5958.54	6900.97
933.5	-22.1489	-13.8801	-9.21727	-0.921092	81.1907	536.185	1295.12	2194.51	3208.61	4134.56	5088.56	5954.52	6914.26
934	-19.6472	-14.8639	-10.3081	-0.173761	81.9212	538.293	1295.14	2194.07	3216.76	4132.88	5090.18	5960.08	6910.95
934.5	-19.0681	-14.9014	-9.74303	-1.21435	82.3538	535.311	1289.52	2194.24	3219.95	4135.38	5098.67	5965.3	6917.62
935	-19.2792	-14.2681	-9.77196	-2.34622	82.4904	535.019	1286.57	2195.13	3215.68	4137.82	5101.33	5970.06	6916.91
935.5	-19.0818	-14.9041	-9.61706	-1.48984	80.902	535.947	1288.69	2194.09	3212.37	4134.97	5100.33	5984.47	6904.83
936	-18.3262	-14.8586	-8.57424	-1.71018	79.6081	535.82	1286.37	2193.05	3213.87	4139.61	5108.72	5992.45	6899.46
936.5	-18.6555	-15.2023	-7.70177	-1.08816	83.9809	540.823	1287.96	2192	3219.87	4134.72	5115.94	5989.61	6899.42
937	-19.2696	-13.5565	-8.05958	-2.0028	86.0745	539.31	1292.07	2187.76	3222.25	4126.56	5119.27	5985.93	6897.82
937.5	-17.72	-13.754	-7.79665	-1.09443	86.7687	539.579	1292.27	2184.68	3224.32	4127.28	5115.25	5978.66	6890.32
938	-17.2417	-13.9321	-8.25459	-1.22505	85.9019	539.78	1288.69	2183.34	3222.49	4131.96	5120.34	5973.78	6894.08
938.5	-16.9937	-14.8532	-8.6157	-1.2502	84.7632	536.016	1285.25	2192.42	3219.37	4136.61	5118.97	5983.19	6896.24
939	-17.2205	-13.5986	-8.4791	-0.791775	85.5708	530.89	1284.37	2201.56	3212.32	4135.98	5108.08	5982.07	6895.06
939.5	-19.0716	-11.9531	-9.53438	-1.63015	87.8362	530.623	1284.3	2204.3	3210.12	4137.85	5100.9	5980.41	6892.48
940	-19.5714	-12.5214	-8.90374	-1.65931	88.8037	537.287	1282.64	2198.61	3205.44	4147.55	5115.09	5982.51	6908.49
940.5	-18.715	-13.9743	-8.73653	-1.91262	88.9479	537.487	1280.75	2192.66	3204.74	4156.44	5132.16	5982.11	6920.44
941	-17.5472	-13.3198	-9.33516	-2.30226	86.9536	539.483	1277.43	2186.47	3215.46	4156.7	5130.42	5978.86	6922.64
941.5	-17.35	-13.1967	-9.17658	-1.4484	87.5488	538.75	1278.49	2183.12	3222.55	4159.09	5122.17	5979.58	6921.36
942	-17.9634	-13.5809	-8.44042	-2.96116	87.6391	532.635	1278.9	2190.53	3219.28	4156.77	5122.38	5975.95	6910.56
942.5	-18.4531	-13.8434	-9.02504	-2.48778	87.5228	534.63	1278.93	2197.32	3222.3	4165.84	5128.95	5978.64	6889.21
943	-17.9582	-13.3613	-7.80173	-0.598951	87.7212	540.111	1285.26	2204.39	3231.76	4168.65	5129.8	5981.57	6887.48
943.5	-17.1711	-13.6911	-7.90702	-0.977071	89.785	540.815	1285.67	2204.77	3232.35	4165.39	5121.22	5978.46	6891.75
944	-15.6923	-12.6395	-8.31097	-1.37517	91.3167	540.938	1281	2207.48	3236.83	4157.84	5120.9	5982.84	6893.02
944.5	-15.819	-13.7313	-9.52213	-1.67661	90.2511	540.889	1277.94	2203.74	3242.94	4149.78	5113.48	5981.28	6891.65
945	-17.8419	-15.5036	-9.12542	-0.613498	90.5781	540.742	1274.76	2201.6	3232.8	4144.05	5104.56	5976.43	6889.39
945.5	-16.6006	-13.1432	-9.25099	1.11697	92.5243	538.969	1273.53	2202.23	3231.17	4142.8	5110.95	5962.3	6885.76
946	-17.3384	-13.5013	-9.87154	-0.0105124	91.9702	538.055	1271.27	2196.39	3237.78	4153.74	5114.63	5952.91	6890.14
946.5	-17.3075	-13.7628	-9.39034	1.19428	93.8555	538.214	1270.16	2186.53	3246.01	4168.7	5119.52	5943.57	6893.53
947	-18.6593	-14.0408	-9.67307	-0.714571	95.8041	533.665	1276.72	2182.16	3244.77	4174.08	5115.98	5933.75	6901.44
947.5	-17.8584	-13.9727	-11.3948	1.31948	93.5945	529.936	1277.61	2180.74	3238.67	4175.81	5109.53	5943.68	6903.7
948	-16.4527	-15.2701	-11.3573	0.219784	92.0397	529.396	1275.92	2181.31	3222.48	4171.92	5108.08	5949.28	6904.45
948.5	-16.1316	-15.431	-10.2915	-0.188071	91.9228	527.034	1274.02	2175.16	3209.9	4165.15	5105.28	5952.76	6908.19
949	-18.0049	-14.3114	-8.89083	0.346597	90.137	527.589	1267.77	2177	3215.49	4161.98	5096.21	5968.32	6912.98
949.5	-18.932	-13.4535	-9.26927	-0.867862	90.4678	535.162	1268.01	2178.86	3221.39	4163.86	5091.9	5978.46	6907.03
950	-19.0671	-14.1706	-10.0877	-1.37491	94.3063	533.942	1268.08	2182.05	3211.04	4170.28	5099.25	5980.28	6904.09
950.5	-19.3164	-13.3842	-9.3346	-1.91123	94.9376	529.059	1266.48	2185.04	3204.23	4170.52	5095.59	5980.68	6908.01
951	-19.1524	-14.6054	-8.22869	-0.850733	92.9494	525.607	1264.72	2186.4	3200.48	4159.79	5096.09	5980.48	6910.94
951.5	-18.5077	-15.1401	-8.97295	-0.565149	91.0235	526.146	1264.1	2191.35	3203.44	4154.48	5105.6	5974.53	6907.03
952	-18.9121	-14.0352	-9.65164	-0.596195	91.9809	528.221	1267.28	2192.01	3211.77	4154.52	5107.87	5979.99	6899.9
952.5	-19.1146	-14.1172	-7.60243	-0.223901	93.083	526.853	1270.05	2195.54	3210.45	4160.48	5098.28	5982.63	6906.26
953	-18.419	-15.3568	-8.21753	0.100473	94.1066	522.837	1272.44	2196.86	3213.6	4164.03	5092.45	5977.78	6927.27
953.5	-18.2784	-16.1441	-8.61584	1.49144	93.7549	521.508	1274.3	2199.44	3205.46	4157.13	5095.52	5977.84	6929.97
954	-16.5503	-14.8777	-6.5707	-0.511579	93.3161	522.234	1275.25	2204.18	3201.47	4156.07	5094.9	5980.07	6926.28
954.5	-17.235	-14.4456	-7.92293	-0.220687	95.3866	518.077	1279.93	2200.47	3213.38	4166.99	5080.61	5981.52	6935.13
955	-16.0735	-13.3768	-7.91168	-0.0768268	96.8757	513.638	1278.06	2195.28	3211.67	4174.19	5071.83	5986.35	6945.76
955.5	-16.7488	-13.295	-7.98584	0.672744	95.0059	514.066	1270.38	2197.08	3218.01	4177.3	5078.3	5983.49	6941.53
956	-16.3924	-15.0024	-7.80557	-1.05195	92.097	516.254	1272.87	2199.13	3220.57	4178.6	5078.77	5973.79	6939.4
956.5	-16.0726	-16.0011	-8.57393	-2.85114	88.6135	515.303	1275.27	2201.68	3212.54	4177.63	5078.16	5968.5	6939.05
957	-16.8419	-15.42	-9.62183	-1.06045	85.709	510.821	1270.23	2203.39	3203.61	4179.11	5083.97	5977.03	6941.09
957.5	-17.2575	-14.548	-9.59498	-1.56423	84.4794	510.511	1268.64	2206.63	3197.59	4185.56	5090.38	5986.96	6933.04
958	-17.301	-14.3687	-10.5414	-1.31989	85.0014	507.284	1275.58	2212.27	3201.5	4188.58	5091.06	5986.92	6934.37
958.5	-18.1984	-16.8262	-10.0599	-1.30877	85.1946	506.264	1273.24	2213.87	3213.27	4187.12	5090.03	5985.1	6945.33
959	-18.591	-15.0256	-9.30497	-2.00284	83.7386	506.725	1278.37	2208.59	3216.13	4188.53	5087.97	5987.99	6957.34
959.5	-18.1557	-12.9662	-9.31947	-2.62231	82.5337	505.288	1286.41	2199.23	3218.5	4192	5091.39	5994.82	6958.73
960	-17.0499	-12.2109	-9.55183	-2.44797	83.4636	504.907	1285.49	2191.63	3208.42	4186.62	5096.09	5991.54	6958.25
960.5	-19.1445	-13.3983	-9.59931	-1.77485	82.3199	509.453	1281.6	2188.16	3205.97	4177.89	5090.54	5985.75	6956.45
961	-17.4959	-15.5965	-10.6495	-1.69064	81.9974	512.676	1277.02	2189.66	3202.68	4178.74	5087.1	5982.97	6955.25
961.5	-16.9732	-13.9872	-9.22903	-0.447892	85.1228	515.615	1271.55	2187	3204.21	4175.58	5093.29	5985.41	6945.33
962	-17.6862	-15.855	-9.61137	-1.32391	83.8494	517.473	1269.77	2184.64	3203.55	4174.3	5105.84	5989.46	6932.12
962.5	-17.5802	-16.3045	-9.49975	-1.90971	82.2147	521.678	1271.97	2182.01	3207.82	4174.71	5116.14	5977.76	6926.29
963	-16.534	-14.6774	-8.78634	-3.42919	86.9547	519.321	1273.37	2180.62	3210.92	4171.13	5118.32	5975.78	6918.64
963.5	-16.8609	-14.9074	-9.47973	-2.80236	90.4112	514.074	1276.12	2180.65	3220.54	4161.34	5122.2	5982.4	6911.02
964	-17.6841	-16.0551	-8.41477	-1.79992	90.7379	513.75	1278.18	2173.05	3230.11	4153.07	5125.73	5992.43	6908.83
964.5	-18.984	-14.663	-9.19753	-2.27154	90.9003	513.06	1281.65	2165.43	3230.55	4160.37	5125.23	5995.64	6907.03
965	-18.0774	-13.4091	-9.59795	-1.84325	90.6855	516.533	1281.24	2158.58	3230.62	4168.19	5120.88	5993.1	6905.4
965.5	-17.8058	-14.0692	-9.39308	-2.73959	92.0813	523.08	1283.25	2162.61	3233.84	4173.55	5118.6	5986.3	6906.32
966	-17.8857	-15.6595	-9.21203	-2.95624	89.8839	521.356	1283.38	2172.72	3234.91	4170.15	5103.06	5975.87	6901.47
966.5	-19.5866	-15.1182	-8.86831	-0.839815	88.6775	518.464	1287.07	2181.88	3235.8	4170.59	5100.42	5964.1	6895.57
967	-19.6691	-15.0327	-9.69424	0.0230914	87.7078	521.114	1291.06	2187.33	3235.3	4180.78	5104.19	5957.16	6899.02
967.5	-18.0898	-16.4746	-8.90665	0.853561	87.1554	527.325	1288.88	2187.92	3232.8	4184.43	5104.74	5946.84	6898.67
968	-18.6051	-16.245	-7.87108	0.904829	86.9056	531.082	1291.68	2187.59	3229.36	4195.87	5103.73	5956.19	6903.21
968.5	-18.8437	-13.7935	-8.31661	2.16193	85.1211	531.772	1295.71	2186	3225.99	4196.92	5107.91	5970.66	6906.75
969	-18.07	-14.0578	-8.39053	0.925964	85.6723	531.527	1297.47	2191.66	3225.31	4191.32	5112.5	5978.4	6905.82
969.5	-17.341	-13.9945	-8.41235	-0.562569	85.8379	531.928	1292.63	2191.36	3228.63	4187.17	5119.98	5979.36	6907.88
970	-17.4506	-14.9556	-9.14518	-1.00093	84.2102	532.117	1288	2186.27	3230.58	4183.73	5114.62	5986.42	6909.77
970.5	-16.7231	-14.0537	-8.5261	0.058412	83.1313	532.929	1285.13	2187.74	3225.23	4183.42	5105.53	5991.26	6900.8
971	-16.7414	-13.0489	-8.38843	-0.514125	83.9574	535.278	1280.79	2194.83	3223.18	4179.02	5099.62	5983.26	6894.13
971.5	-17.6127	-14.4638	-7.89622	-1.00764	83.6194	535.38	1277.5	2200.77	3234.45	4184.49	5098.06	5981.77	6886.18
972	-17.3257	-15.2094	-8.31353	-0.658151	84.1043	533.204	1274.8	2201.45	3233.98	4188.59	5087.93	5974.99	6881.13
972.5	-16.5997	-13.8352	-8.33614	-0.937949	84.1084	531.028	1277.1	2208.01	3231.33	4187.62	5088.05	5964.62	6884.65
973	-16.4711	-13.0265	-8.11566	-1.26094	83.4296	527.723	1280.57	2201.61	3231.66	4190.99	5092.07	5962.44	6881.89
973.5	-16.6352	-13.4447	-9.94052	-1.13984	85.2207	527.993	1289.38	2191.72	3225.02	4194.47	5091.25	5974.81	6870.25
974	-16.7293	-14.3422	-10.5091	-1.37872	88.7555	533.162	1291.89	2188.36	3219.26	4192.49	5096.03	5976.74	6861.87
974.5	-16.3233	-14.1892	-8.33188	-1.35494	87.9587	535.285	1287.58	2182.29	3215.73	4198.18	5109.43	5967.05	6859.87
975	-16.6867	-14.1083	-9.39904	-1.50684	89.8451	534.381	1287.99	2188.48	3220.87	4199.22	5108.77	5960.97	6863.03
975.5	-17.5287	-13.9732	-8.75976	-2.73877	88.5957	534.286	1288.02	2197.97	3228.93	4201.1	5109.48	5971.17	6860.35
976	-17.3509	-13.0348	-8.79239	-3.76298	86.8923	533.259	1290.53	2199.5	3235.33	4212.78	5110.24	5972.6	6863.4
976.5	-16.1977	-13.7981	-10.1783	-2.92886	84.6673	534.076	1285.93	2196.16	3224.46	4214.47	5101.02	5966.77	6867.58
977	-16.2151	-13.8143	-10.6034	-0.792214	84.1706	538.221	1281.24	2201.5	3225.28	4203.42	5109.58	5968.1	6854.4
977.5	-18.0094	-12.8505	-10.5747	-2.69304	82.5191	536.734	1278.96	2197.85	3232.32	4193.39	5110.8	5977.8	6836.46
978	-17.6735	-15.295	-9.52536	-4.00528	82.5021	531.717	1282.28	2192.29	3233.11	4191.85	5100.21	5979.73	6825.2
978.5	-17.8589	-15.0379	-9.47258	-3.94987	84.3636	533.832	1285.52	2184.86	3227.78	4193.57	5097.66	5976.29	6822.77
979	-17.978	-14.4857	-9.71815	-2.69168	83.0925	538.174	1284.67	2180.94	3223.76	4191.28	5097.99	5975.36	6834.35
979.5	-16.8333	-14.731	-9.59142	-2.23824	83.7899	538.401	1286.15	2178.99	3214.77	4200.82	5107.25	5974.21	6837.37
980	-17.4768	-15.422	-9.65152	-4.13973	84.1283	536.05	1283.24	2182.56	3207	4202.56	5114.32	5980.35	6831.61
980.5	-17.607	-16.0477	-9.43211	-5.34018	81.6171	536.242	1278.31	2184.99	3200.27	4201.66	5110.18	5984.43	6834.25
981	-18.1639	-14.2135	-8.89835	-4.11844	81.9596	542.085	1277.12	2183.68	3198.58	4197.38	5105.06	5989.65	6847.78
981.5	-17.1762	-13.5843	-9.89728	-2.82316	84.2153	540.837	1275.08	2182.98	3194.19	4193.37	5098.68	5981.35	6844.48
982	-19.2113	-15.4996	-9.50887	-2.86118	82.9804	539.696	1274.24	2181.82	3186.79	4189.17	5095.61	5973.59	6830.62
982.5	-18.092	-13.6075	-9.24789	-0.862974	83.7999	540.415	1273.44	2173.81	3182.51	4177.84	5092.77	5971.57	6826.72
983	-19.1516	-12.8886	-10.5205	0.0371427	85.609	544.558	1271.87	2174.25	3181.55	4168.22	5091.87	5967.12	6830.39
983.5	-17.8424	-15.3793	-8.65879	-0.652313	85.8479	547.778	1270.83	2178.12	3182.91	4172.89	5092.41	5965.64	6833.18
984	-17.7167	-15.0062	-8.91853	-0.298792	86.1261	548.758	1272.48	2178.23	3185.97	4176.76	5097.8	5964.78	6834.01
984.5	-18.0522	-14.041	-7.49363	0.111943	85.9569	550.512	1277.47	2178.14	3184.53	4179.5	5107.45	5970.51	6842.98
985	-18.8168	-14.6786	-8.46749	0.260879	85.4102	553.857	1281.78	2179.34	3183.59	4176.02	5118.33	5982.88	6845.19
985.5	-18.2055	-14.8721	-8.98955	-1.68833	85.4631	553.263	1284.08	2181.61	3188.22	4177.61	5117.96	5985.88	6849.01
986	-17.2329	-14.7066	-7.9066	-0.7804	85.5423	545.079	1277.12	2177.34	3191.68	4185.23	5110.78	5986.42	6845.31
986.5	-18.0804	-14.2831	-7.51247	-2.7808	87.7051	542.873	1271.51	2174.59	3201.89	4181	5102.14	5984.95	6844.45
987	-19.1191	-14.3616	-8.38789	-1.14294	88.4298	545.428	1268.18	2174.57	3205.07	4170.82	5102.3	5984.75	6838.73
987.5	-19.3231	-14.4455	-7.90121	-2.50639	86.5732	548.149	1266.65	2173.09	3199.88	4165.28	5109.45	5995.18	6836.72
988	-16.5035	-12.9669	-8.52806	-3.27389	85.9661	555.063	1263.79	2177.22	3203.56	4169.12	5110.59	5995.69	6837.95
988.5	-16.2932	-13.0857	-7.57188	-4.5995	86.447	561.466	1257.42	2178.81	3212.49	4169.85	5100.52	5986.6	6843.62
989	-16.3527	-13.2473	-6.91051	-3.08864	84.491	561.525	1255.09	2177.44	3224.47	4171.55	5094.02	5984.19	6852.88
989.5	-17.6758	-13.3984	-8.03061	-3.18463	86.0116	556.412	1256.26	2175.52	3220.07	4165.28	5093.72	5993.05	6854.6
990	-18.0528	-13.8542	-7.54631	-2.06978	86.6686	551.974	1257.5	2169.6	3205.72	4161.19	5086.67	5998.09	6853.72
990.5	-17.7033	-13.9505	-9.40237	-1.52781	87.3855	547.573	1253.04	2161.61	3196.24	4167.2	5081.95	5999.92	6862.78
991	-16.6279	-12.8844	-9.80265	-2.18664	85.7184	550.285	1249.9	2154.96	3195.23	4171.68	5083.78	6005.91	6866.18
991.5	-16.8206	-11.0155	-8.64186	-1.47277	83.8051	548.771	1253.47	2153.01	3192.13	4170.25	5084.85	6007.95	6861.43
992	-16.448	-12.4425	-6.88049	-4.40543	82.145	544.005	1261.66	2154.48	3190.97	4171.85	5099.57	6016.86	6863.24
992.5	-15.5071	-12.2488	-8.57126	-3.72372	81.427	539.021	1265.58	2157.34	3199.69	4168.8	5113.55	6016.03	6875.31
993	-16.5877	-12.8208	-9.68432	-3.84722	83.3414	535.792	1273.76	2156.38	3204.94	4163.63	5117.63	6009.67	6868.69
993.5	-18.0965	-13.8396	-9.10973	-3.56069	83.704	534.631	1279.87	2166.85	3205.46	4152.22	5115.49	6002.69	6863.53
994	-16.6008	-14.4877	-9.56243	-3.81751	84.2288	539.925	1281.59	2165.6	3206.5	4141.41	5114.13	5997.77	6868.84
994.5	-16.6252	-14.4311	-8.51245	-3.17848	82.89	542.245	1283.69	2158.85	3211.86	4142.65	5113.66	5995.75	6878
995	-15.1597	-15.3684	-9.78796	-3.11698	84.0052	539.761	1287.1	2155.2	3214.06	4140.69	5118.45	5993.61	6885.66
995.5	-15.9897	-15.2895	-9.84509	-2.38409	84.9936	537.144	1290.41	2157.64	3207.89	4139.59	5109.74	5992.82	6887.47
996	-15.992	-14.1739	-7.68944	-2.36787	85.7921	535.019	1292.7	2166.03	3205.86	4142.99	5091.83	5990.6	6886.1
996.5	-16.4745	-15.2054	-8.44196	-4.26669	84.7212	536.719	1290.13	2164.93	3208.7	4142.73	5078.52	5988.44	6888.27
997	-16.6621	-15.1314	-8.66917	-4.25968	84.8497	537.226	1287.6	2165.4	3204.37	4135.27	5073.59	5995.04	6890.74
997.5	-17.6753	-14.3762	-9.59842	-2.20638	85.5926	540.528	1286.22	2172.38	3199.68	4143.36	5076.87	5995.54	6891.97
998	-16.4691	-14.5382	-8.5126	-2.00898	86.0931	536.058	1289.47	2177.75	3202.95	4143.74	5085.67	5996.69	6904.62
998.5	-16.9002	-15.6466	-8.59088	-1.41371	85.2859	531.15	1287.48	2189.67	3212.14	4138.55	5089.6	6001.12	6907.93
999	-17.4403	-15.633	-7.82332	-2.7367	84.091	531.279	1283.56	2193.54	3215.72	4131.19	5087.65	6003.58	6910.81
999.5	-18.303	-13.9907	-8.93849	-0.9554	85.4442	532.619	1281.11	2195.29	3220.39	4129.68	5094.07	6002.65	6913.95
[truncated: 9,501 more rows]

## Sheet: Q2-GW-Q3 2018.04.0014
0	-33.5483	-37.7698	-26.1857	-25.5252	-24.0866	-22.5155	-17.7466	-14.9163	-9.49817	-14.0992	-9.6535	-7.91377	-10.0462
0.5	-38.0014	-39.1559	-24.2915	-26.9442	-24.774	-22.3983	-17.5613	-14.4109	-11.9541	-13.402	-9.68809	-9.00388	-12.2182
1	-39.0802	-38.86	-24.95	-25.5086	-25.6849	-23.1393	-18.5061	-15.3993	-14.0356	-13.4588	-8.75642	-9.93369	-11.8381
1.5	-41.2033	-38.8601	-25.8271	-23.242	-26.2358	-23.855	-20.08	-16.8934	-13.9621	-13.4161	-7.7251	-9.68047	-9.86959
2	-41.2541	-37.7854	-24.5531	-22.1211	-26.5722	-25.3584	-20.2959	-16.8651	-14.1363	-13.9715	-7.99071	-9.57523	-9.9641
2.5	-39.9154	-35.3825	-27.8084	-22.3962	-26.5119	-25.1653	-21.1462	-17.1162	-14.5585	-12.5453	-10.0117	-11.0695	-11.2166
3	-36.9066	-35.4358	-27.044	-23.1376	-26.2519	-23.4733	-18.6737	-16.5705	-13.88	-13.3966	-9.23138	-11.175	-12.1641
3.5	-36.6604	-38.735	-23.5074	-23.6867	-26.0966	-23.6905	-17.3362	-16.1549	-14.1263	-12.9012	-8.86697	-11.0387	-12.9145
4	-37.3005	-40.2273	-23.5147	-24.955	-24.5397	-23.5443	-18.6804	-17.6319	-13.2567	-12.5733	-8.00914	-10.9964	-9.95923
4.5	-39.2897	-41.0326	-22.7122	-24.712	-26.64	-22.2419	-16.1395	-16.931	-12.9869	-13.414	-8.53362	-12.2967	-10.238
5	-38.1051	-39.7682	-24.0447	-24.5365	-24.809	-22.2731	-16.9439	-16.515	-13.1627	-14.4072	-8.78776	-13.0514	-8.50916
5.5	-38.2006	-37.9787	-22.4998	-25.3403	-24.8627	-23.1186	-18.9711	-15.0636	-11.418	-13.3329	-8.699	-11.7128	-8.79122
6	-37.4241	-40.5649	-21.0171	-24.4437	-25.0774	-21.378	-18.2976	-15.2223	-11.2962	-13.7049	-8.6302	-11.262	-9.43041
6.5	-36.1678	-39.2952	-19.4421	-25.1736	-26.253	-22.4266	-17.772	-15.7102	-10.4717	-14.4144	-8.56537	-11.0194	-10.8582
7	-36.888	-38.0035	-22.2854	-27.2421	-25.1187	-22.7662	-19.1838	-15.0988	-11.2375	-15.1521	-8.45627	-11.0548	-9.99931
7.5	-36.8118	-38.1691	-25.8449	-26.8297	-26.009	-21.0705	-20.1366	-15.7206	-12.0829	-13.8227	-8.8259	-11.161	-10.001
8	-36.3634	-36.5373	-25.0837	-24.3871	-24.9615	-22.2067	-21.5217	-16.1816	-12.9191	-13.9123	-9.62399	-10.1528	-9.23729
8.5	-37.11	-37.5464	-26.6889	-22.9976	-26.6635	-24.0351	-20.7458	-16.0142	-12.7965	-14.3827	-10.5074	-9.47838	-9.87908
9	-38.2373	-37.1265	-26.7785	-23.7107	-26.0905	-23.5874	-18.1395	-15.7369	-13.9835	-14.8489	-9.63843	-10.3234	-10.8787
9.5	-35.9883	-40.0844	-27.0039	-26.3298	-26.2436	-26.5067	-20.1309	-18.3633	-14.0822	-12.5918	-10.1795	-9.48053	-9.51941
10	-33.2939	-38.8614	-28.849	-24.0679	-26.4878	-23.822	-19.7521	-18.8519	-13.5788	-12.422	-9.52015	-8.61173	-9.6397
10.5	-32.8235	-38.2945	-28.2974	-24.6506	-26.8942	-23.9082	-18.0778	-18.0826	-12.331	-11.5536	-9.9918	-8.77076	-8.85509
11	-35.3511	-38.6659	-25.7109	-25.218	-24.922	-24.5782	-18.7909	-18.4065	-11.9777	-12.9475	-10.0485	-11.5011	-8.00054
11.5	-37.3065	-37.2009	-25.7488	-24.6969	-26.5372	-22.8353	-18.0475	-16.8396	-11.4422	-12.1998	-11.0904	-10.2556	-6.66041
12	-36.5971	-37.2703	-27.0872	-24.9588	-26.5909	-21.6016	-17.3081	-17.3421	-12.3358	-12.8208	-11.3092	-8.06375	-6.70023
12.5	-35.3263	-38.3939	-26.373	-25.7976	-24.9728	-22.5345	-16.779	-15.2207	-11.2708	-13.587	-9.96027	-9.40686	-6.31241
13	-35.1777	-38.6325	-27.676	-23.5233	-25.7541	-23.411	-19.1415	-16.0617	-11.5386	-13.71	-8.69605	-8.38048	-8.93693
13.5	-34.6952	-38.7929	-29.2749	-21.4234	-23.5622	-24.0767	-18.0962	-15.1224	-13.1557	-10.8986	-9.19432	-8.45695	-8.69134
14	-34.047	-38.0408	-27.8591	-22.8444	-23.5829	-23.5223	-17.2933	-14.3001	-13.6597	-12.6097	-11.2328	-9.22686	-7.65493
14.5	-33.8131	-36.0815	-27.9902	-22.9139	-25.5645	-22.3957	-16.4652	-15.6865	-14.2333	-11.7777	-11.8467	-8.9319	-8.98097
15	-35.6381	-37.6268	-26.6687	-22.6778	-25.87	-22.6764	-18.1273	-15.7248	-13.1405	-12.3801	-10.9803	-9.04426	-6.57526
15.5	-33.5046	-39.9899	-25.8868	-22.8869	-25.5038	-24.7243	-18.3111	-15.7771	-12.2713	-13.1159	-9.15506	-8.80071	-6.66633
16	-34.6492	-39.4469	-23.826	-23.7944	-24.8827	-25.8139	-16.7141	-16.8478	-11.9636	-14.4254	-9.76421	-8.44988	-7.54111
16.5	-36.6466	-40.0263	-24.1261	-24.5963	-26.096	-27.1078	-16.8835	-15.7208	-13.3025	-13.7074	-9.69341	-10.1389	-8.39281
17	-35.8932	-39.2406	-23.2178	-23.9332	-26.229	-26.3789	-17.6528	-16.5492	-13.9019	-11.5994	-10.1124	-8.7581	-8.84947
17.5	-38.1882	-38.1583	-24.895	-23.0384	-23.7454	-24.9958	-19.3785	-17.6041	-10.8496	-13.3425	-9.78211	-9.58561	-8.91036
18	-38.8325	-39.8846	-26.0905	-24.7668	-23.9159	-23.7028	-18.2264	-17.9711	-10.7328	-13.0375	-10.3316	-10.6113	-9.56888
18.5	-39.7569	-41.1202	-27.9688	-23.0973	-26.2021	-24.2464	-17.8597	-16.5344	-12.7757	-13.4439	-10.5969	-11.0175	-9.55955
19	-36.4076	-39.4921	-27.79	-22.6782	-27.6611	-24.4121	-17.6084	-17.0599	-13.4839	-12.5446	-8.54654	-11.4394	-9.68025
19.5	-36.3713	-39.3213	-27.3285	-21.7707	-26.2956	-22.5094	-17.6999	-16.9182	-11.746	-13.9274	-9.13595	-11.6958	-8.47701
20	-36.8303	-38.9416	-24.7141	-21.8059	-24.6697	-20.8751	-17.4763	-17.7687	-12.0901	-13.9234	-11.19	-9.0345	-8.82587
20.5	-38.6403	-41.0711	-24.2865	-24.1706	-24.7546	-18.4798	-16.4835	-18.0743	-13.1192	-11.1505	-11.3682	-7.80356	-9.27197
21	-40.1099	-40.4095	-24.9121	-24.4666	-24.3405	-19.6097	-16.6824	-17.5562	-11.0873	-12.3576	-12.1405	-8.81871	-9.40955
21.5	-40.6058	-40.4728	-23.8371	-22.7272	-25.2805	-20.0937	-17.2851	-17.7914	-11.9765	-13.322	-12.2862	-9.45357	-9.19843
22	-40.4398	-39.7074	-24.2093	-22.5947	-23.8498	-20.9058	-17.3705	-16.4181	-12.2437	-13.2884	-10.9737	-9.22179	-9.54396
22.5	-38.2272	-38.6397	-25.3568	-23.3536	-24.0238	-21.4494	-18.663	-16.5836	-13.5849	-12.0877	-10.6906	-7.48268	-9.48336
23	-39.1319	-37.4547	-25.0016	-25.3928	-24.1387	-22.9212	-17.4574	-17.5591	-13.5322	-13.6381	-10.3242	-8.08885	-9.50751
23.5	-39.9795	-40.1387	-23.8171	-26.4936	-23.8471	-24.9275	-17.8897	-18.3719	-12.4726	-12.7054	-10.1574	-10.1407	-8.82974
24	-39.308	-41.2675	-22.3113	-29.0494	-23.6948	-23.9973	-18.7664	-18.7947	-11.9335	-12.2008	-10.117	-8.79731	-8.82963
24.5	-39.5932	-41.6502	-24.5091	-28.8169	-21.3455	-25.3098	-17.744	-17.0023	-12.1152	-13.0813	-9.94222	-9.60382	-8.63282
25	-39.9169	-41.3318	-25.9088	-28.1438	-23.8111	-26.5707	-17.492	-15.2034	-11.147	-11.1809	-10.3724	-10.4526	-7.7432
25.5	-38.7678	-39.6519	-25.6845	-28.6097	-24.7921	-27.9088	-19.1573	-16.0404	-13.2949	-10.0894	-10.623	-9.75934	-7.22817
26	-38.7133	-37.5801	-24.9305	-27.6594	-26.0231	-27.2181	-17.2346	-16.1127	-12.4513	-9.90944	-9.1219	-11.0284	-7.57567
26.5	-38.5916	-38.3257	-25.1939	-27.4538	-24.8229	-28.4896	-16.9834	-17.2503	-12.3666	-11.929	-10.5469	-10.1219	-7.6246
27	-39.5422	-36.9026	-24.5005	-25.8761	-24.4761	-28.5607	-17.4464	-17.3821	-10.9709	-12.035	-12.3258	-8.40032	-7.97537
27.5	-39.5727	-37.9996	-26.0807	-27.089	-24.921	-24.9173	-17.0479	-16.7584	-13.1549	-11.6089	-12.9342	-7.16381	-6.64774
28	-40.0183	-39.199	-26.9856	-25.6814	-24.8184	-21.8009	-15.9238	-17.8753	-12.6163	-11.2975	-10.8678	-9.35824	-5.47862
28.5	-40.9	-39.9294	-27.3336	-24.0067	-24.5663	-23.2093	-17.1654	-16.9993	-12.89	-9.24178	-9.26522	-9.18373	-7.83165
29	-37.6642	-39.495	-27.5179	-22.7385	-23.8556	-25.7875	-17.9386	-15.6822	-13.0984	-11.6433	-9.11913	-10.2348	-7.33193
29.5	-36.9348	-41.543	-27.4862	-24.611	-24.0569	-26.3169	-17.962	-16.8116	-12.7294	-11.1215	-9.21544	-11.2204	-9.03409
30	-37.4956	-39.9096	-26.2361	-25.3081	-24.067	-24.5116	-17.1286	-17.9636	-12.6213	-10.5301	-10.0533	-10.0826	-8.88781
30.5	-38.2959	-38.1956	-27.5315	-25.1387	-24.5506	-25.2142	-17.4444	-16.6109	-12.6957	-10.2869	-11.2807	-10.1545	-7.67578
31	-39.6413	-38.4345	-27.8315	-25.0269	-23.7078	-24.4379	-14.7182	-17.3426	-10.2148	-11.2891	-9.98055	-11.5887	-7.91452
31.5	-37.702	-37.5398	-27.3884	-24.8768	-24.4347	-24.6879	-15.773	-17.3475	-11.6247	-10.8693	-9.68554	-11.8374	-7.95263
32	-37.0005	-37.8216	-27.4477	-25.0827	-25.2489	-26.7031	-17.2363	-18.2787	-12.0722	-10.4275	-11.6517	-11.0244	-8.11963
32.5	-38.2172	-36.2954	-26.6846	-25.7407	-22.5941	-26.5756	-17.3225	-18.1552	-12.183	-10.6852	-9.62433	-9.18641	-6.5977
33	-37.1199	-39.6729	-25.7607	-27.0023	-25.3718	-27.3011	-17.6422	-18.2783	-12.6923	-12.2312	-8.79485	-9.69307	-8.47677
33.5	-37.7665	-39.6959	-27.1187	-25.9917	-26.7183	-24.22	-16.8565	-17.5194	-12.72	-13.4733	-7.70868	-10.3043	-9.16985
34	-37.3935	-40.2715	-27.0249	-26.9435	-25.196	-23.6915	-17.1273	-19.8788	-12.8491	-14.0752	-7.42675	-11.0637	-9.0784
34.5	-36.6257	-40.1245	-25.9602	-24.8105	-25.1686	-24.6864	-15.2785	-19.2814	-12.4518	-13.2629	-8.29744	-9.15921	-9.302
35	-37.906	-39.0926	-25.1429	-24.6987	-25.3443	-24.7877	-16.6683	-17.3805	-13.6715	-12.2081	-9.80904	-9.34342	-8.32105
35.5	-36.9555	-39.7997	-25.9582	-25.8114	-26.5447	-22.5251	-16.9345	-17.3448	-13.6136	-11.8389	-11.1821	-10.8321	-7.64322
36	-36.2201	-41.2607	-26.7397	-26.1627	-28.798	-22.5682	-16.6581	-18.5042	-11.7483	-13.3188	-9.65065	-11.5536	-8.308
36.5	-36.6646	-38.8806	-26.2345	-26.7089	-28.8942	-24.2819	-16.788	-20.6408	-11.7579	-11.4707	-9.09609	-11.1046	-7.86136
37	-39.0309	-38.0076	-25.8443	-26.6157	-29.2368	-25.4766	-18.5572	-19.8856	-12.1218	-12.8638	-10.6462	-10.4079	-7.07392
37.5	-41.5059	-36.7606	-29.9054	-24.4753	-27.4822	-24.6338	-17.6305	-18.5854	-12.2414	-13.1062	-8.94991	-8.6785	-6.7667
38	-40.7413	-36.3539	-27.866	-23.5215	-26.551	-21.9907	-15.3675	-17.8548	-12.2741	-12.8268	-8.62117	-9.81917	-5.43428
38.5	-39.6218	-38.2307	-28.2862	-24.1186	-25.7528	-22.3082	-15.202	-18.5512	-12.4419	-13.8411	-10.2943	-10.3467	-8.43435
39	-37.565	-39.1663	-26.4602	-24.3469	-24.8905	-22.1353	-18.8244	-17.3509	-12.5059	-13.8353	-11.2339	-9.18092	-7.55055
39.5	-36.1656	-39.3233	-25.4797	-25.3135	-25.7168	-24.0384	-20.8159	-17.5068	-12.9734	-13.1533	-10.5389	-8.75155	-7.3564
40	-37.195	-36.8659	-26.3025	-25.7303	-27.2634	-23.2579	-19.6593	-19.9586	-11.1801	-14.0103	-9.19461	-9.58658	-6.55955
40.5	-36.0202	-37.8104	-26.9135	-27.2507	-26.0394	-23.0307	-18.5023	-19.6398	-11.7717	-14.3945	-8.59087	-7.9873	-6.12354
41	-37.2182	-37.352	-28.0352	-27.6966	-22.1987	-21.0537	-17.8915	-18.807	-12.5024	-13.9714	-8.81348	-7.68845	-7.60185
41.5	-38.0532	-36.1704	-27.1521	-24.8816	-21.4264	-23.4507	-19.5617	-17.1236	-13.1402	-13.5647	-9.95748	-8.90987	-7.9046
42	-38.5605	-36.3513	-25.0156	-27.4293	-23.4921	-25.3855	-18.4484	-15.1813	-11.6093	-14.2254	-10.3127	-9.50823	-7.92505
42.5	-38.6141	-37.4409	-26.2129	-26.1485	-26.6894	-23.75	-17.2425	-15.0066	-12.7925	-12.4805	-9.5755	-7.87132	-7.46283
43	-37.792	-36.467	-24.8918	-23.7778	-27.1205	-23.3402	-16.8115	-16.7953	-12.6378	-13.7252	-9.72991	-9.84755	-6.97136
43.5	-37.1773	-37.0469	-25.1758	-24.9121	-26.337	-23.4197	-16.3483	-17.3227	-13.1578	-11.4328	-9.58784	-9.51879	-8.60072
44	-37.5555	-34.5993	-27.637	-21.7133	-28.216	-23.4739	-15.5226	-16.8952	-12.8143	-12.6217	-10.321	-10.8459	-8.76573
44.5	-36.7164	-36.1739	-29.1762	-21.2329	-25.493	-23.4803	-16.8745	-18.896	-12.6664	-12.4972	-7.76029	-11.024	-6.97069
45	-38.8892	-38.1505	-28.7682	-21.9586	-26.1268	-21.8059	-19.6386	-18.7392	-11.5645	-12.0839	-8.65504	-9.07577	-9.3335
45.5	-39.045	-35.9112	-26.0108	-23.1785	-27.0701	-22.5942	-17.8908	-19.1095	-12.4447	-12.3833	-8.37579	-11.5352	-9.3271
46	-38.994	-36.5168	-27.2911	-22.6046	-26.4303	-22.6946	-16.6181	-21.0783	-12.8095	-12.2452	-7.37757	-10.7339	-9.00838
46.5	-37.5628	-37.4814	-26.8488	-20.301	-25.121	-22.7541	-16.777	-20.258	-13.1288	-12.6942	-8.78372	-8.69529	-9.00369
47	-36.5554	-38.6482	-27.6901	-20.7802	-23.3938	-28.6236	-17.7748	-17.4213	-12.6867	-12.9606	-10.2226	-9.581	-8.94971
47.5	-36.9656	-39.2623	-27.2947	-20.6025	-25.1868	-26.5324	-17.9191	-17.4363	-13.1235	-11.7691	-8.41903	-8.45969	-8.11246
48	-36.5958	-39.0793	-25.9756	-22.4201	-26.7573	-25.4646	-16.8624	-15.9312	-11.7786	-11.9971	-8.97514	-8.66865	-8.41609
48.5	-37.5441	-36.2636	-26.4115	-23.5428	-25.6887	-24.7024	-16.5028	-16.4497	-14.1123	-12.7042	-9.50448	-9.64656	-8.78664
49	-37.8865	-36.7074	-29.0752	-26.1405	-26.0873	-24.569	-16.9496	-17.6582	-14.1374	-9.76743	-9.31131	-9.76661	-7.40722
49.5	-36.7611	-37.1025	-27.7329	-26.1235	-25.9403	-24.6592	-17.53	-17.3971	-14.2125	-10.8497	-10.3526	-10.7787	-5.6243
50	-37.4355	-37.3259	-27.5013	-25.435	-25.216	-24.2154	-16.8404	-18.4895	-15.1419	-10.2232	-9.91299	-10.5699	-8.50454
50.5	-37.7318	-36.0492	-25.9585	-26.8971	-27.4601	-23.9032	-17.9289	-17.6721	-14.6639	-11.7022	-8.63358	-10.328	-9.65604
51	-36.0584	-33.1506	-26.2138	-24.4091	-27.6008	-26.2103	-16.5586	-16.5911	-12.7412	-10.7399	-9.54443	-11.2154	-8.84437
51.5	-35.9474	-35.2737	-25.6771	-24.6426	-27.8084	-24.8141	-17.0415	-16.6602	-12.7265	-11.4621	-9.39139	-12.8077	-7.85853
52	-36.9878	-36.6891	-25.3074	-23.4759	-27.584	-23.2983	-19.5749	-18.6376	-12.5666	-11.6882	-10.4209	-9.26647	-9.64033
52.5	-35.4762	-37.0316	-24.7684	-22.559	-27.2413	-24.0115	-18.5147	-19.3802	-10.9503	-10.3498	-10.5571	-7.30855	-9.55364
53	-37.6664	-37.7527	-25.2363	-23.401	-25.6132	-23.2447	-17.3295	-20.8599	-12.2373	-10.9491	-9.97137	-9.69056	-9.49553
53.5	-38.6589	-36.8592	-25.2862	-24.3986	-24.5185	-21.5773	-16.4101	-19.1152	-12.2656	-13.2959	-10.4361	-11.969	-9.73646
54	-38.6849	-37.0495	-26.6639	-23.557	-26.2446	-23.0925	-15.9008	-18.7441	-11.2354	-14.2129	-13.1924	-11.0496	-8.67645
54.5	-37.3835	-37.1123	-25.9892	-23.905	-25.8877	-21.4318	-15.4427	-19.614	-12.2612	-13.8318	-11.4739	-10.1451	-8.91713
55	-38.0319	-38.3559	-24.6724	-26.0099	-24.9973	-20.918	-16.3707	-18.3796	-12.3602	-13.004	-12.0229	-11.3699	-8.83271
55.5	-38.9658	-39.712	-25.9113	-25.6607	-26.997	-21.7858	-17.6921	-18.7122	-13.6934	-10.7549	-11.2717	-12.5053	-8.41799
56	-39.3769	-40.1265	-27.2973	-24.668	-24.6793	-20.8362	-17.9447	-18.8631	-13.6169	-11.4335	-10.6841	-11.1448	-8.14854
56.5	-38.6408	-39.0009	-26.9102	-24.3458	-25.5823	-21.6012	-16.2638	-18.5467	-13.6059	-11.7951	-11.5197	-9.74872	-7.41174
57	-39.3809	-39.7166	-25.7068	-25.5442	-26.9407	-21.3238	-16.8713	-17.9189	-13.0462	-10.7487	-11.1969	-11.987	-7.40038
57.5	-37.3998	-40.8301	-26.2177	-26.5758	-26.124	-19.4876	-18.7207	-17.2082	-14.1684	-11.4386	-12.8645	-10.9454	-7.5214
58	-35.9659	-37.759	-25.967	-27.0051	-29.3687	-20.0565	-16.2414	-16.9904	-13.7813	-13.284	-11.2078	-10.8742	-7.33619
58.5	-37.2958	-38.0983	-26.6636	-30.4578	-26.7534	-19.7666	-15.0904	-17.4073	-13.2953	-12.824	-12.0042	-9.68872	-7.84864
59	-37.058	-38.972	-25.315	-29.4191	-27.009	-22.1257	-16.7893	-19.3322	-12.297	-11.9542	-11.8371	-7.50527	-9.96113
59.5	-38.1447	-38.7843	-26.6337	-30.3822	-28.579	-23.5752	-16.3912	-17.8844	-12.4493	-12.7252	-9.71786	-10.906	-8.88814
60	-37.8426	-36.3356	-25.5687	-31.0255	-26.308	-25.0278	-14.4928	-16.7263	-12.918	-12.0882	-10.6213	-8.08393	-7.07157
60.5	-36.4292	-37.5065	-25.6416	-29.2086	-24.6766	-22.7906	-14.9939	-17.2771	-11.8201	-11.9414	-10.6372	-7.71128	-8.47093
61	-38.1295	-38.8983	-25.3222	-27.5892	-23.2742	-21.9802	-16.0115	-19.2305	-12.871	-13.4072	-9.22604	-9.62937	-9.28548
61.5	-38.7576	-38.1357	-26.5998	-28.2164	-24.0073	-23.2131	-16.3259	-18.9085	-12.2649	-13.3143	-9.75076	-8.40832	-8.08813
62	-40.2264	-39.3959	-28.9627	-28.0942	-23.6478	-24.0064	-14.7346	-17.1538	-11.8774	-11.9702	-9.17891	-9.66472	-6.76129
62.5	-39.3841	-38.7262	-28.6535	-27.6709	-23.1375	-25.1833	-15.7676	-17.9484	-11.1049	-12.4154	-10.5195	-9.74972	-9.17398
63	-36.474	-39.7201	-26.0475	-27.7148	-24.1031	-24.2087	-14.226	-18.3539	-10.131	-13.1672	-7.93165	-8.88397	-7.55125
63.5	-37.8667	-38.446	-26.4617	-30.2662	-25.8469	-24.8762	-15.2334	-20.2364	-10.7434	-12.7062	-9.18059	-8.7861	-8.36239
64	-36.4048	-38.4742	-26.4846	-26.9359	-24.1437	-24.6237	-15.2514	-17.9666	-10.9148	-12.3049	-10.194	-9.35345	-8.8403
64.5	-35.8671	-38.6028	-26.9286	-26.4137	-25.0861	-23.4587	-16.6992	-17.4353	-10.6108	-11.664	-8.60352	-8.76871	-10.3723
65	-38.6985	-37.8762	-26.9508	-25.4293	-24.9728	-24.7434	-16.5894	-18.9052	-10.3955	-13.5878	-10.3236	-9.84034	-10.95
65.5	-36.6072	-38.1915	-26.0931	-25.6978	-25.1178	-24.7393	-16.9429	-20.2896	-9.33109	-14.3344	-10.6452	-8.35687	-9.72222
66	-37.0456	-35.8778	-28.6571	-27.0564	-23.8736	-25.3783	-16.364	-19.7361	-11.3993	-13.0017	-10.9571	-7.92856	-10.2982
66.5	-39.5019	-35.6867	-29.0629	-27.7904	-25.0408	-25.6532	-16.8957	-18.4781	-13.6593	-12.5366	-12.1991	-8.18132	-8.67954
67	-39.995	-36.7674	-28.3561	-26.5276	-25.5682	-23.5725	-16.1964	-18.0165	-13.6115	-13.9797	-12.3503	-7.4343	-8.52589
67.5	-38.8307	-41.327	-26.6549	-26.6318	-21.9869	-24.6578	-16.2286	-16.071	-12.8026	-13.4318	-12.1242	-7.03202	-7.31969
68	-39.1868	-42.4268	-27.1639	-27.089	-23.1197	-22.3071	-14.6421	-15.6791	-13.4479	-14.8382	-13.0541	-9.50731	-7.83165
68.5	-37.931	-39.828	-26.8444	-26.0585	-25.0254	-22.4624	-14.1373	-17.902	-12.7737	-12.5002	-12.3862	-10.3375	-8.60353
69	-38.2254	-39.8302	-26.7323	-26.0183	-27.335	-24.0043	-14.7325	-19.4455	-10.2646	-13.0965	-11.6157	-9.03653	-9.10612
69.5	-38.7488	-38.5918	-27.7333	-25.7262	-28.6802	-22.9105	-15.6538	-19.9951	-11.6401	-14.4264	-11.6035	-7.94461	-8.57537
70	-38.5025	-39.1107	-28.3246	-25.4944	-26.8434	-21.3898	-16.8946	-17.813	-11.8496	-14.2119	-12.058	-6.42705	-8.16689
70.5	-37.8598	-40.5977	-28.5148	-24.9967	-24.0585	-20.4449	-18.1419	-17.2764	-12.4918	-15.118	-12.6099	-6.22933	-10.127
71	-38.6071	-41.4058	-27.9375	-27.2373	-24.5975	-24.0092	-18.6011	-17.564	-12.9998	-14.8902	-12.8522	-6.3571	-9.96875
71.5	-39.2196	-39.7766	-25.6812	-27.5315	-25.0081	-24.614	-19.8629	-17.5716	-13.2358	-15.1106	-12.3572	-10.1586	-9.38474
72	-39.1982	-39.2245	-25.9724	-27.5576	-25.138	-24.5078	-19.564	-14.9428	-12.0671	-15.1663	-11.4379	-9.7387	-10.6482
72.5	-38.5588	-40.0718	-26.0806	-28.4108	-25.3763	-22.1681	-17.0233	-15.5505	-12.5857	-15.1875	-12.6098	-8.184	-10.0088
73	-40.8257	-41.4947	-24.4249	-26.67	-25.0778	-23.2031	-18.2447	-15.1547	-13.5498	-14.7456	-12.9363	-6.9656	-10.2635
73.5	-39.7371	-41.1488	-25.6484	-26.9385	-26.5014	-23.8682	-16.5692	-15.9504	-12.2338	-14.0908	-14.1373	-6.98839	-11.3517
74	-36.0365	-39.6753	-25.0444	-26.2969	-26.8003	-24.6387	-16.6122	-18.0603	-11.0909	-11.8969	-14.4524	-7.09025	-10.565
74.5	-34.3717	-40.501	-26.6565	-27.6382	-25.9189	-24.8231	-15.4487	-19.0074	-12.7466	-13.1106	-12.8163	-7.64997	-7.93678
75	-35.5183	-41.6716	-27.6441	-28.5361	-26.9811	-24.9013	-16.4138	-16.5843	-10.7998	-15.7069	-11.7514	-8.00296	-6.81046
75.5	-37.4283	-42.8186	-28.3737	-26.9635	-27.1752	-24.8365	-18.0082	-18.2282	-10.2179	-15.0388	-11.8987	-6.80888	-8.05254
76	-37.0716	-42.9923	-25.931	-26.4269	-26.2073	-25.5991	-18.7943	-17.607	-12.518	-13.6717	-12.8439	-8.0487	-9.04913
76.5	-36.7889	-39.3787	-27.7599	-27.2734	-23.669	-24.8731	-17.8129	-17.3223	-11.8621	-14.2319	-12.9851	-7.22585	-8.90372
77	-36.2973	-38.0673	-31.3172	-27.2777	-25.0161	-24.2993	-16.4078	-16.3611	-11.2884	-13.509	-12.7245	-6.05004	-9.08975
77.5	-35.3501	-38.6102	-29.3558	-27.4644	-25.7467	-25.6379	-17.362	-15.3824	-11.7508	-13.4892	-9.77719	-6.34586	-8.8217
78	-37.1554	-36.8053	-28.3974	-28.4892	-23.3173	-24.7312	-16.8607	-14.8814	-13.0181	-12.7506	-9.6378	-6.25018	-8.2648
78.5	-38.4291	-37.0797	-28.1536	-26.6991	-25.6187	-24.6569	-17.4056	-16.4918	-12.5263	-11.832	-12.0616	-7.60423	-9.19772
79	-36.7538	-35.0452	-32.3499	-25.6254	-27.9733	-23.0931	-19.1002	-16.3065	-12.6952	-12.4105	-11.613	-5.51967	-8.97659
79.5	-38.0602	-35.8698	-30.393	-25.4274	-23.9229	-17.0747	-11.4683	-9.34861	-3.59298	-3.85047	-1.08949	6.63413	5.17185
80	-37.8486	-16.899	14.5453	42.1359	67.7585	95.3356	151.016	178.586	217.259	242.074	269.224	315.066	331.215
80.5	-36.7048	-8.02962	33.6375	70.2035	112.649	152.508	182.716	193.065	214.235	225.629	257.105	321.807	334.643
81	-35.1504	-23.5475	-3.46179	13.4814	31.2939	47.3818	37.9238	3.52163	-40.2085	-43.9322	-9.01441	45.6681	74.0474
81.5	-36.4306	-23.274	-9.84875	5.83609	16.72	24.8093	10.8669	-40.3065	-67.4322	-34.6199	16.8235	58.2238	78.0072
82	-36.2439	-27.289	-13.4483	1.15429	9.47361	13.813	0.384149	-44.0024	-45.6732	-4.28495	39.1955	60.0323	72.6787
82.5	-34.2965	-29.2478	-14.8248	-3.26532	6.32805	7.05874	-4.89254	-42.9095	-25.7553	12.9709	40.7556	52.2727	64.3108
83	-37.8915	-27.6259	-15.1637	-5.03291	1.86351	3.96875	-9.86674	-39.6697	-14.8071	15.9943	38.6779	45.1873	55.7038
83.5	-37.8748	-28.5652	-17.6891	-6.06431	-2.24977	-0.340343	-17.0177	-35.8352	-5.27194	15.8438	32.6126	37.311	46.237
84	-35.4146	-29.7265	-17.7374	-7.56445	-4.7746	-4.66636	-19.7065	-29.139	0.986827	15.082	28.5468	31.8268	40.8137
84.5	-36.7603	-29.6847	-19.3073	-9.88367	-8.05603	-8.71873	-16.8124	-25.3153	2.11165	12.7581	23.4449	27.4955	34.9988
85	-38.4537	-32.6994	-19.7244	-11.694	-9.70686	-11.745	-17.0921	-21.6766	-0.438427	9.85826	19.5028	22.5098	30.2885
85.5	-38.3078	-33.2239	-19.1405	-10.7145	-9.56239	-14.6314	-18.0715	-20.3764	-4.24516	9.68497	16.9193	19.9733	26.6712
86	-37.813	-34.4464	-19.0609	-12.5903	-11.3673	-15.2393	-20.6959	-21.1697	-2.57629	9.02602	15.8239	17.4097	22.9556
86.5	-37.1063	-33.9217	-20.318	-14.1003	-14.8395	-15.5379	-24.8849	-19.6865	-2.20656	7.17497	12.1291	15.5242	20.1345
87	-36.0012	-32.7857	-22.2603	-15.5848	-14.5592	-16.8533	-27.5291	-20.0496	-2.06551	5.63129	10.6927	13.8917	18.2321
87.5	-34.6421	-33.6947	-21.3784	-16.8914	-15.6867	-18.4244	-24.7243	-22.2777	-3.87124	3.08779	9.11844	15.5035	17.8913
88	-36.9329	-33.2854	-19.9283	-15.2133	-18.6014	-19.0785	-23.649	-21.0712	-3.41983	1.92584	9.14498	12.4368	18.1855
88.5	-39.6043	-33.125	-19.647	-12.7739	-20.0552	-20.8046	-27.2308	-20.338	-5.44819	3.03665	8.29078	9.84335	15.748
89	-41.768	-34.5335	-20.3991	-15.143	-19.5896	-19.1008	-31.1827	-19.5233	-4.68383	1.48925	6.26433	8.25259	15.8936
89.5	-40.0236	-33.9776	-19.2122	-16.717	-19.6446	-18.0507	-25.5086	-16.4459	-6.05055	1.34975	7.32398	8.48125	16.2454
90	-40.8987	-32.0934	-21.0233	-16.9686	-21.014	-17.7111	-22.3463	-17.6186	-4.92283	0.478986	6.21005	9.02248	14.362
90.5	-41.452	-34.944	-21.0666	-15.096	-21.1815	-19.0674	-20.2908	-18.7452	-4.75704	0.371334	8.18186	7.29796	15.372
91	-42.2197	-35.0233	-20.8513	-15.4588	-21.9749	-19.6526	-23.8482	-19.6809	-3.88917	-0.352977	7.04431	5.90623	16.8502
91.5	-41.7071	-32.2331	-20.9835	-19.0703	-19.1985	-19.1184	-24.8365	-15.4961	-4.30333	0.621123	6.60401	6.7215	15.1547
92	-40.1751	-29.4492	-21.0351	-18.761	-20.2995	-22.2897	-23.3956	-15.8589	-4.93329	0.43407	6.00647	9.88298	14.3646
92.5	-38.8774	-31.911	-19.1136	-19.7858	-20.6054	-20.0562	-20.2497	-13.3005	-5.13354	-1.52375	4.4331	11.0778	16.8991
93	-38.9705	-31.8478	-19.898	-19.1959	-21.2332	-18.7073	-17.3469	-13.0358	-5.4133	-0.108208	3.5824	10.3453	16.7101
93.5	-37.5911	-33.3496	-20.5186	-19.6968	-21.002	-17.0955	-18.0729	-13.981	-4.3196	-0.145592	3.36865	9.59019	17.5316
94	-38.9124	-34.5693	-20.0062	-19.0806	-20.0334	-16.0376	-19.9465	-16.6836	-5.00145	-0.247846	3.4908	10.3238	20.1817
94.5	-37.1746	-33.2502	-19.9197	-18.2242	-18.8223	-15.5197	-18.1308	-13.79	-3.96793	1.28142	4.10547	9.69641	23.0602
95	-38.4456	-35.0694	-20.6695	-20.1671	-19.1448	-16.0562	-17.5853	-10.8755	-2.85634	2.17491	7.64412	11.3063	23.4153
95.5	-39.696	-35.1824	-21.8127	-18.4787	-19.5716	-18.7362	-20.138	-11.0349	-3.05547	3.00316	9.37293	14.3576	25.8089
96	-38.8961	-35.0153	-22.9971	-16.9821	-19.7118	-20.8334	-19.98	-10.3907	-4.31187	4.14413	8.68604	17.2708	26.6168
96.5	-38.198	-33.7564	-23.9718	-17.2853	-20.216	-20.3662	-20.6068	-8.80974	-5.86127	2.67427	7.87979	20.246	28.47
97	-37.0945	-34.2159	-21.6627	-18.3035	-20.311	-18.9337	-16.9691	-7.95798	-6.12153	2.05431	9.13892	19.9782	31.8249
97.5	-37.895	-33.5558	-22.1284	-17.7125	-20.1033	-18.6207	-16.1844	-8.42438	-4.45185	1.18347	8.44614	23.1509	35.4027
98	-38.4198	-34.3528	-22.1772	-17.3779	-19.9895	-17.5464	-17.6832	-7.93898	-2.82821	1.82057	9.40355	22.1681	37.942
98.5	-37.9439	-35.0877	-21.6208	-19.0452	-21.5998	-15.3379	-16.5801	-7.50633	-2.48035	2.78684	11.8492	21.2108	39.2514
99	-39.0377	-33.6443	-22.5389	-20.7429	-22.243	-17.2022	-13.199	-7.64647	-3.05379	4.20763	11.8886	20.9533	46.8474
99.5	-39.0449	-34.7143	-22.5344	-20.8636	-20.4926	-16.4931	-12.5982	-6.91059	-2.08516	4.13403	11.9942	22.0984	54.77
100	-39.4513	-34.6207	-22.2161	-19.471	-20.9043	-16.2109	-15.0861	-9.55521	-0.534785	4.52619	15.095	24.1112	57.4479
100.5	-37.1877	-34.9525	-22.3232	-20.5452	-22.7513	-17.6617	-14.4126	-10.8708	-0.00697245	4.49747	17.0291	28.171	60.8884
101	-37.483	-35.1601	-22.2545	-20.2791	-20.998	-16.5637	-12.9966	-10.0912	-0.615334	3.35758	18.225	30.7376	63.7411
101.5	-40.6936	-36.9017	-22.3994	-21.5113	-18.9708	-17.1455	-11.2448	-10.1828	-0.729854	2.38427	21.282	32.9992	67.1553
102	-40.4526	-36.2725	-23.2886	-21.1089	-18.3685	-17.3247	-10.2787	-12.0821	-1.62672	3.06717	23.7334	37.1108	72.0099
102.5	-38.4969	-36.1521	-23.5969	-18.9922	-20.2095	-18.2258	-11.705	-11.4271	-2.94783	4.473	23.2609	38.9124	78.6976
103	-37.1805	-34.087	-21.3671	-18.5109	-19.455	-16.7044	-13.9659	-9.61059	-0.858723	3.24964	23.4972	37.7037	85.1178
103.5	-38.4506	-35.0201	-20.7723	-16.3071	-19.5833	-15.4911	-12.6435	-10.7129	0.12477	4.24531	25.3806	38.294	93.95
104	-35.3278	-35.0736	-21.6382	-17.0335	-19.2497	-14.69	-14.5713	-9.08458	0.709613	7.34603	28.4432	41.369	99.6453
104.5	-35.6685	-34.521	-20.869	-17.3436	-18.3277	-14.7682	-16.4252	-8.51014	1.11903	9.51615	29.5455	45.4475	102.982
105	-35.1801	-34.5262	-22.1346	-19.5519	-18.0866	-15.8226	-16.2305	-5.54748	2.03968	9.91978	32.0174	50.0608	107.194
105.5	-35.8681	-36.7383	-20.6725	-18.8831	-18.8795	-14.6239	-15.2541	-6.05144	1.55318	11.1311	32.9928	53.8011	110.722
106	-36.9708	-35.8069	-19.7792	-19.6478	-19.0234	-14.2519	-15.6309	-5.89223	1.02541	14.5341	32.0964	58.4118	115.162
106.5	-39.9762	-34.7392	-21.81	-21.161	-18.019	-13.4678	-13.287	-7.36925	0.229232	15.739	34.2253	60.1222	120.647
107	-38.8298	-34.2958	-19.2131	-20.7365	-18.1562	-14.2747	-12.3567	-6.52254	-0.856764	15.9978	37.4772	64.7863	124.945
107.5	-36.1104	-36.1398	-20.0865	-20.8866	-18.3899	-16.2612	-12.3915	-6.92015	0.674244	16.0561	38.7477	69.539	131.768
108	-35.1847	-34.756	-19.2881	-20.3451	-19.417	-15.3072	-13.7419	-5.9265	5.23612	16.7796	41.7023	75.5614	138.402
108.5	-36.3403	-33.4778	-18.657	-19.1713	-20.4764	-13.2812	-12.6112	-7.32795	7.22142	17.7296	45.0051	84.4774	144.553
109	-37.2111	-34.2199	-19.6175	-20.3595	-17.5965	-13.3998	-10.074	-7.51071	8.26275	19.6362	48.347	87.5488	149.95
109.5	-38.7536	-36.5373	-20.5378	-22.0288	-16.7449	-15.5012	-13.5877	-8.54851	9.22452	21.2991	51.5968	91.4483	157.301
110	-38.2331	-34.7695	-21.8387	-22.2805	-17.3561	-14.8571	-15.2237	-5.05574	8.77826	22.3327	54.2812	97.4085	165.035
110.5	-37.4653	-34.4367	-21.0039	-20.803	-16.5701	-13.5781	-13.1949	-4.33158	8.63426	22.9123	58.4298	103.716	173.991
111	-37.8811	-32.3273	-20.3882	-22.3634	-17.4187	-13.1882	-13.9083	-3.93959	10.8409	25.1698	63.9924	109.99	178.69
111.5	-37.1516	-30.5631	-19.0658	-19.8481	-17.7939	-13.1374	-11.5592	-4.93451	8.82781	24.5078	69.049	119.2	184.951
112	-36.3548	-30.3174	-20.4517	-18.8957	-19.2835	-12.3275	-9.23319	-3.15701	8.2535	26.3048	70.9707	125.206	197.81
112.5	-37.7902	-30.1919	-22.7532	-18.2512	-18.0321	-11.6485	-7.73315	-1.63411	9.27834	27.0686	76.3783	132.025	209.351
113	-35.5356	-30.3161	-23.8344	-17.7748	-18.2895	-12.8573	-8.65012	-0.982847	12.3885	29.2562	82.2434	139.129	218.293
113.5	-36.3013	-29.6845	-23.1045	-18.5908	-17.6503	-13.3988	-10.2865	-2.95138	13.231	29.563	89.0326	146.738	225.652
114	-38.4491	-30.1224	-24.5005	-18.4166	-16.3682	-11.6527	-11.1537	-2.41579	13.353	31.1872	89.5513	152.846	235.482
114.5	-38.0935	-29.9396	-22.5667	-17.646	-18.4851	-11.8288	-10.1311	-0.552731	14.1651	33.2207	91.4836	157.64	239.167
115	-37.076	-31.4266	-21.7848	-17.8612	-17.4042	-11.6926	-9.47781	-3.12573	15.56	35.6328	95.0042	163.119	242.899
115.5	-36.113	-34.3071	-22.9379	-18.1238	-16.8377	-11.3235	-6.68995	-1.22887	17.4368	36.0614	96.0775	167.71	253.051
116	-37.5355	-33.5525	-21.5558	-19.1946	-15.7829	-13.9375	-8.00227	-0.564419	18.7075	33.0952	102.03	174.198	265.883
116.5	-37.639	-33.1371	-21.7628	-19.4574	-14.6687	-13.4281	-8.97938	-1.50484	19.552	37.3106	108.311	175.564	278.902
117	-39.105	-30.3757	-21.4727	-19.6843	-15.8417	-13.1298	-7.72538	-2.25618	22.4989	43.492	111.525	182.735	287.59
117.5	-36.7723	-31.8875	-21.0319	-19.4201	-16.7127	-12.7128	-9.436	-1.38692	27.5094	43.297	116.06	192.714	298.713
118	-38.2333	-33.3028	-19.197	-18.2174	-16.6635	-12.5658	-8.06586	-1.66413	27.6821	46.1214	117.548	203.65	305.917
118.5	-38.745	-33.332	-22.3665	-19.0443	-17.1546	-12.9055	-7.95807	0.00929861	28.1822	51.2194	119.269	211.216	315.046
119	-37.8699	-32.695	-22.6624	-19.0747	-16.8587	-13.6767	-8.11845	1.58335	30.2888	54.2955	125.503	217.89	328.004
119.5	-39.3731	-32.5482	-22.3383	-19.0353	-17.54	-12.5221	-9.59102	0.384742	31.1863	57.3763	135.72	227.732	342.902
120	-37.608	-33.7497	-22.7094	-19.5824	-17.1594	-11.1954	-9.62159	0.609477	31.6481	61.4978	143.611	235.05	353.673
120.5	-36.1743	-34.9321	-21.7535	-18.8255	-16.9186	-11.0877	-10.5674	0.947734	31.2053	63.4474	149.986	239.343	365.308
121	-37.8314	-32.6776	-20.4459	-17.5012	-15.6555	-11.1259	-9.65611	2.89733	29.7409	67.8331	155.96	245.506	381.813
121.5	-36.3356	-33.6433	-21.7298	-19.4233	-16.5338	-10.3784	-9.79378	3.60266	31.3775	68.6111	163.718	256.105	395.763
122	-35.8695	-32.2131	-20.7115	-19.9095	-18.2899	-12.299	-9.77586	3.92515	34.1964	73.6992	165.894	265.956	408.615
122.5	-36.3576	-31.4517	-21.4224	-21.4051	-17.4798	-10.6051	-7.20028	6.90255	38.4963	79.1161	167.067	275.168	417.126
123	-38.0679	-34.9128	-21.5017	-21.4809	-17.5458	-11.9616	-4.69921	7.11325	42.6945	80.1807	169.964	281.143	431.369
123.5	-37.6595	-34.5464	-20.443	-21.3407	-17.2826	-12.2657	-2.78927	8.77668	42.5438	79.7392	172.564	283.926	440.659
124	-37.9416	-33.9757	-19.9388	-20.2785	-16.5744	-11.2889	-3.94638	9.60903	42.8752	82.1275	176.529	289.655	454.613
124.5	-35.6895	-34.9644	-19.1357	-19.3221	-19.0914	-10.656	-5.04314	7.96738	45.3699	85.3375	183.012	299.123	465.014
125	-34.2651	-35.1345	-19.2926	-20.7484	-18.4656	-12.0928	-7.7179	9.49711	48.0066	86.8696	189.802	308.032	470.055
125.5	-35.4067	-33.1653	-20.8798	-20.304	-18.2462	-11.0589	-7.62216	10.4197	47.2743	89.6187	195.615	314.692	477.898
126	-36.3281	-30.6914	-22.9398	-19.9271	-17.0131	-10.7501	-8.27161	8.87256	49.714	92.1901	200.987	319.137	485.253
126.5	-36.21	-31.8045	-22.0452	-21.2386	-15.8385	-12.3288	-6.66926	12.1697	49.159	96.4035	203.458	324.103	499.295
127	-36.7432	-35.4145	-22.3576	-21.0734	-17.1703	-11.7703	-5.41796	14.8926	50.9335	98.6305	208.663	337.942	517.355
127.5	-36.9582	-35.1269	-21.7463	-21.9248	-16.3408	-9.49083	-4.1519	18.0732	54.6887	100.876	221.103	349.977	527.391
128	-35.8706	-34.9508	-21.5627	-22.0297	-17.6169	-10.5985	-3.15219	20.0765	54.5404	103.142	228.407	358.615	540.104
128.5	-35.2381	-33.6684	-23.4934	-22.9515	-17.2059	-8.7571	-4.64591	21.5334	57.628	106.888	235.051	366.257	547.405
129	-35.5834	-33.8006	-21.726	-20.914	-16.8072	-10.6603	-4.53884	22.2561	56.2806	109.302	246.685	375.546	561.02
129.5	-36.6733	-34.1971	-22.3058	-21.03	-18.0023	-9.95997	-4.26086	23.9119	57.3381	115.386	252.698	386.296	574.424
130	-35.9562	-35.222	-21.4125	-20.6548	-18.4371	-11.4368	-3.52201	22.6973	58.7475	119.543	261.673	397.867	587.263
130.5	-36.0644	-33.5624	-20.9889	-19.9935	-17.751	-12.3992	-0.566838	22.6988	58.8661	125.295	269.864	406.531	600.188
131	-36.5641	-32.2957	-22.1861	-18.9895	-17.7798	-10.8016	-0.234351	22.6448	61.0181	132.124	276.36	413.144	610.521
131.5	-36.9394	-32.5073	-20.4694	-19.6628	-17.1122	-11.4961	-3.94277	23.0168	66.223	131.828	284.026	421.974	618.182
132	-37.2956	-32.9131	-20.2463	-20.5949	-15.8327	-11.2284	-2.37475	25.5847	70.8728	129.095	289.97	427.149	631.739
132.5	-39.1685	-33.4473	-21.686	-17.4183	-16.7004	-8.88947	-2.86204	26.0513	77.9474	131.718	290.233	438.134	640.368
133	-38.617	-32.4473	-21.8597	-17.5224	-17.5032	-12.1828	-1.20997	25.819	80.644	135.378	300.686	447.774	641.807
133.5	-37.1447	-34.3224	-23.3808	-16.7501	-18.6789	-12.3409	0.929123	29.8851	84.5871	141.707	309.074	455.978	650.47
134	-38.4963	-34.1343	-22.5777	-17.77	-17.1321	-10.0277	2.17081	32.0626	88.2898	145.985	315.493	462.419	658.59
134.5	-37.9925	-33.8436	-22.5563	-16.9414	-16.1662	-9.36709	3.66772	32.7281	90.5552	149.584	317.898	471.529	663.015
135	-37.5644	-33.0629	-22.6491	-16.3496	-15.3151	-11.0259	5.40257	33.1141	93.5179	155.626	323.285	481.185	675.676
135.5	-34.9586	-33.0969	-20.4969	-17.4552	-16.2874	-11.4996	5.575	32.6839	94.7085	159.009	327.458	485.319	688.368
136	-34.842	-32.5868	-21.5664	-15.5848	-15.1634	-12.8155	5.54312	30.7326	96.0638	164.02	330.004	495.235	694.109
136.5	-38.0684	-32.5494	-20.8197	-15.0198	-16.9926	-10.3619	6.15926	31.9376	97.7005	170.4	336.582	502.15	706.236
137	-38.366	-30.7102	-20.0648	-17.7195	-16.125	-10.9094	6.42197	35.7847	97.9016	172.395	349.001	505.848	717.09
137.5	-38.1777	-32.3949	-22.1011	-18.6954	-15.6249	-10.6769	6.67049	37.6794	101.393	175.01	355.257	514.571	730.409
138	-37.5596	-34.4522	-21.1764	-18.6092	-14.993	-10.13	7.34072	39.3266	102.366	180.953	355.238	524.331	738.203
138.5	-38.1946	-35.064	-21.2622	-19.0393	-14.6744	-8.93644	7.64383	41.0497	104.162	186.676	355.061	526.73	747.973
139	-37.1549	-36.21	-19.0733	-17.9937	-16.5965	-8.08684	5.95554	40.5384	107.541	191.733	358.785	532.397	757.308
139.5	-38.74	-36.4429	-18.6903	-17.515	-15.9891	-7.27884	6.23164	42.2022	106.894	197.736	367.077	536.497	771.772
140	-39.5121	-34.3516	-20.7935	-18.9669	-15.2353	-7.72114	6.72905	42.7088	108.742	200.089	375.209	545.586	777.494
140.5	-39.7666	-35.5175	-20.241	-21.4771	-14.5791	-8.3661	4.98449	44.4406	111.978	206.518	381.641	565.409	782.569
141	-39.9325	-36.8457	-19.7539	-21.8872	-15.1233	-7.59272	3.29033	45.0151	116.269	210.598	391.577	571.797	790.899
141.5	-40.277	-37.1914	-19.5872	-21.4673	-15.9618	-9.92153	4.87972	46.7872	122.963	213.962	396.153	577.354	808.063
142	-39.2291	-36.7469	-20.0734	-18.867	-15.1396	-9.11058	5.47937	46.938	127.454	222.696	399.959	587.534	823.703
142.5	-38.5492	-34.3605	-19.7753	-17.6632	-14.3966	-9.65342	3.14827	49.2976	132.332	229.07	400.48	599.411	834.122
143	-38.5607	-31.5768	-20.7405	-16.8827	-13.6802	-10.3977	4.65927	51.5275	134.832	231.229	411.205	613.226	840.895
143.5	-38.8634	-33.6026	-21.2946	-18.5617	-13.5263	-9.5243	8.3054	52.5984	135.472	233.485	419.201	626.12	844.422
144	-37.7761	-32.5247	-19.2996	-20.4407	-13.8461	-9.59009	8.7795	51.5196	137.727	239.758	423.517	637.71	853.378
144.5	-36.6942	-32.391	-19.2366	-20.7094	-16.266	-8.68941	8.84494	54.962	140.879	247.509	425.915	648.947	866.575
145	-36.2679	-33.6882	-20.3775	-20.7756	-15.2467	-8.92628	11.6048	57.8272	144.532	250.678	428.232	653.959	876.3
145.5	-38.1491	-34.4094	-21.1612	-21.0594	-13.9639	-8.32358	12.7988	61.6305	147.589	255.04	435.109	653.783	883.923
146	-39.2974	-34.1909	-20.0559	-20.8453	-14.2067	-8.83398	12.5225	60.7033	150.449	263.195	443.995	655.561	897.029
146.5	-40.8247	-32.5121	-19.7065	-19.1088	-14.3645	-8.91418	13.798	59.9586	149.237	268.853	451.442	655.867	904.106
147	-38.9435	-33.9709	-22.4314	-19.4154	-17.0074	-7.33103	14.4994	62.5351	153.344	277.61	461.656	667.042	915.295
147.5	-38.9918	-34.4363	-23.8836	-20.2166	-14.4852	-9.39704	13.9261	62.49	159.33	284.625	469.744	676.032	914.535
148	-38.4471	-33.6186	-21.9024	-19.5245	-14.8013	-7.78168	13.9868	61.2175	165.219	289.919	480.411	684.614	924.401
148.5	-41.3162	-32.6978	-23.4671	-18.7665	-14.0706	-7.84061	15.0147	62.1828	171.091	297.476	486.942	701.006	933.926
149	-40.2756	-32.9225	-23.829	-17.2225	-12.8084	-6.81501	15.9877	66.3003	171.015	298.892	494.194	717.067	945.175
149.5	-41.3749	-32.003	-22.3759	-18.207	-13.1843	-7.68151	16.9121	68.0964	171.125	301.15	505.52	728.058	961.156
150	-43.5787	-32.5004	-22.1124	-18.5007	-14.5521	-8.0186	18.8034	69.8886	176.577	302.925	517.497	742.359	972.527
150.5	-42.1445	-33.6829	-21.8017	-18.1313	-17.3488	-7.85663	17.5942	74.248	181.312	304.694	523.597	747.867	974.056
151	-39.9922	-34.5842	-23.4662	-16.5002	-15.9126	-10.6066	15.9279	75.629	184.519	312.256	529.034	756.249	976.709
151.5	-41.294	-34.0186	-23.7122	-17.7493	-15.5445	-7.66413	15.6111	77.3858	186.671	317.134	534.537	766.336	989.574
152	-42.8571	-33.3441	-23.2243	-18.3195	-16.12	-8.34012	17.3809	77.7977	187.317	319.576	539.649	768.327	1005.47
152.5	-40.9868	-35.9474	-22.6542	-17.7659	-17.8666	-8.68082	17.2243	76.0231	188.85	320.541	540.269	775.112	1012.58
153	-41.968	-35.402	-22.4491	-17.1198	-16.6208	-6.94525	17.4	73.9434	189.44	324.421	549.289	781.885	1015.55
153.5	-42.224	-35.7311	-21.8477	-16.4869	-15.0131	-7.87615	16.3198	75.2981	191.686	332.067	558.091	787.898	1023.51
154	-40.2552	-33.4358	-21.341	-15.9243	-15.1458	-7.78681	18.2076	80.3683	195.71	340.189	565.196	800.298	1031.8
154.5	-40.0062	-32.7295	-22.6951	-18.2448	-15.0732	-7.28512	19.6536	83.7718	200.956	340.645	573.49	813.651	1040.58
155	-39.4019	-34.9555	-22.2803	-18.4371	-16.0101	-5.66227	21.12	86.4911	204.92	341.746	585.582	822.958	1047.97
155.5	-42.573	-35.6852	-22.4947	-16.9184	-15.3596	-5.29463	22.8282	87.6349	206.789	348.381	594.849	829.063	1051.53
156	-43.2007	-35.1706	-21.5635	-16.5317	-16.1501	-5.43247	23.1397	87.4983	205.601	358.112	605.094	833.001	1056.08
156.5	-43.5801	-34.6836	-22.1902	-18.6613	-16.4111	-7.47622	21.1376	91.2118	205.857	364.362	608.798	842.862	1064.32
157	-43.2827	-32.1842	-22.7105	-18.5405	-14.078	-6.71275	21.9268	92.3842	208.177	372.535	613.186	850.899	1075.3
157.5	-42.6154	-32.6205	-22.3286	-17.0449	-11.8239	-5.26681	22.8095	93.4927	212.857	377.01	623.47	858.394	1086.12
158	-41.2077	-32.4232	-20.8659	-17.6926	-10.5906	-6.48343	24.063	98.3237	219.67	385.554	637.779	870.139	1095.71
158.5	-40.0342	-32.9727	-22.714	-17.528	-10.6503	-5.59441	24.6353	101.392	225.603	389.065	646.967	878.957	1106.06
159	-40.4178	-32.3419	-21.9278	-17.3706	-11.2468	-2.23359	29.2529	104.49	231.254	395.707	649.645	886.373	1114.78
159.5	-39.8654	-31.4815	-20.9911	-17.7281	-12.9297	-1.68535	32.5747	105.69	238.999	404.132	658.532	900.422	1122.66
160	-42.0831	-34.1811	-21.556	-17.4131	-11.8432	-2.20516	31.6519	107.03	242.758	407.026	667.585	913.592	1137.95
160.5	-42.601	-34.4432	-22.5093	-19.1543	-11.0007	-6.47512	28.8055	111.174	248.004	412.015	672.063	920.38	1164.31
161	-41.694	-33.2475	-23.4025	-18.6551	-11.5733	-7.05959	30.4765	113.874	249.936	417.558	676.083	919.266	1171.76
161.5	-41.4515	-34.1688	-23.4323	-18.471	-12.8619	-5.10552	33.7414	116.106	252.727	422.199	689.104	919.695	1177.84
162	-41.8465	-34.07	-22.7707	-17.8124	-13.849	-4.6075	30.3562	120.454	253.272	424.225	694.868	928.642	1180.99
162.5	-42.5278	-32.3624	-22.5369	-16.9146	-12.124	-5.77499	30.9714	122.089	251.997	430.79	694.23	932.123	1196.49
163	-41.9995	-33.2779	-22.226	-17.6777	-11.9642	-4.79137	36.274	122.92	258.662	436.616	703.459	935.294	1211.87
163.5	-40.6719	-34.2148	-23.873	-16.8785	-12.3902	-3.39184	37.7037	125.096	261.722	441.492	707.712	944.107	1216.03
164	-41.1984	-34.768	-23.4137	-17.5861	-10.9579	-3.6506	38.0736	124.633	262.565	446.963	713.229	956.44	1219.03
164.5	-38.7971	-31.4675	-24.6308	-19.1067	-10.6273	-3.5967	35.976	127.197	264.499	453.127	722.412	964.718	1234.77
165	-38.4417	-31.8411	-22.1808	-19.9924	-11.8859	-4.08942	34.9312	128.789	269.299	458.025	733.451	970.131	1247.06
165.5	-38.6701	-33.0239	-22.0654	-21.6776	-11.8056	-3.78404	37.2379	127.674	275.213	463.234	745.444	976.363	1255.56
166	-38.7701	-32.2327	-21.3566	-20.0173	-11.7562	-3.4979	36.167	129.124	276.68	467.839	761.31	982.955	1257.84
166.5	-41.1842	-34.5835	-22.6311	-19.6615	-12.1658	-3.42631	39.4566	129.733	280.31	472.445	766.372	990.424	1257.64
167	-41.1979	-34.2467	-21.2009	-20.2498	-12.2874	-2.75617	38.8643	130.244	282.656	478.607	773.518	998.255	1255.62
167.5	-41.3609	-35.0882	-21.7092	-18.9749	-13.711	-4.40666	39.6504	131.625	285.026	487.291	783.035	1005.37	1251.31
168	-41.2381	-34.0943	-23.9491	-19.6265	-14.5373	-3.26423	40.2748	131.864	286.164	492.059	788.97	1009.74	1260.02
168.5	-41.4131	-33.0278	-21.6462	-18.1298	-12.5489	-2.52755	41.1229	132.378	290.984	496.525	796.001	1017.48	1276.69
169	-40.7308	-34.9252	-20.9255	-19.5052	-12.4766	-0.826218	45.047	135.854	297.027	499.713	804.749	1027.8	1283.12
169.5	-39.88	-35.555	-22.0695	-20.0045	-12.4446	-1.4663	46.6156	139.356	301.656	498.169	809.824	1036.42	1290.33
170	-41.2197	-34.1208	-21.1866	-20.8684	-12.6169	-1.95266	46.3265	142.007	305.086	501.285	812.969	1037.89	1285.98
170.5	-42.0992	-35.4449	-20.4516	-19.7878	-12.4741	-0.67078	46.4738	145	308.996	505.889	813.324	1040.15	1283.96
171	-41.0424	-37.0319	-20.0464	-16.8388	-12.9828	-0.528781	47.8452	146.063	310.621	513.155	817.791	1039.91	1291.34
171.5	-43.1131	-36.8054	-20.5185	-18.6708	-12.0592	-0.293901	48.9222	152.422	314.338	519.171	827.43	1042.42	1297.12
172	-42.738	-35.8028	-21.4483	-20.6427	-12.5304	1.70946	47.7968	152.105	315.338	529.453	834.215	1047.69	1307.57
172.5	-41.213	-34.8568	-21.5525	-20.4489	-11.2793	2.04228	48.3795	151.434	318.374	541.43	842.395	1051.87	1319.22
173	-40.8919	-35.6564	-22.6379	-21.0093	-12.1817	2.50944	46.7851	153.84	324.252	547.672	848.142	1061.3	1322.74
173.5	-42.398	-36.0675	-22.9427	-20.8613	-12.0002	2.07537	44.7892	156.52	327.03	553.2	854.293	1072.64	1327.13
174	-41.0407	-36.707	-21.4084	-19.8163	-11.5657	2.17189	49.1883	158.523	328.84	561.662	854.68	1077.62	1334.37
174.5	-41.4505	-37.8721	-21.9246	-18.7661	-11.978	2.98577	51.8952	160.117	329.982	568.88	856.625	1075.61	1331.23
175	-43.2234	-36.3539	-21.5306	-18.7183	-11.1423	2.5275	52.9034	160.878	330.489	569.001	868.272	1081.58	1338.97
175.5	-41.4601	-35.9222	-23.2218	-19.8682	-9.45583	1.51441	54.7938	162.702	332.398	570.085	865.758	1085.28	1345.86
176	-38.2947	-37.0716	-24.5494	-19.6833	-10.5899	0.252618	54.0271	163.447	335.551	574.591	868.848	1085.4	1346.57
176.5	-37.4441	-36.2731	-23.9148	-18.6386	-10.2426	3.69309	55.317	166.668	339.621	576.268	881.201	1092.76	1347.31
177	-39.9329	-35.2233	-23.5433	-16.9627	-9.33363	3.92808	53.8575	168.005	344.443	578.409	890.862	1097.55	1352.19
177.5	-39.7928	-34.5539	-23.0847	-18.5629	-9.33731	3.99871	55.6126	172.396	347.803	580.71	903.954	1104.8	1356.46
178	-36.9494	-35.1727	-23.2284	-20.5108	-11.9355	5.83355	55.8256	174.488	351.826	588.857	903.845	1116.77	1362.67
178.5	-36.5134	-35.0943	-22.2675	-19.3634	-11.9714	2.51671	53.2332	175.506	356.856	592.959	901.763	1125.15	1362.49
179	-37.9521	-35.1318	-21.0722	-18.0431	-10.2935	2.45485	56.7485	181.922	360.462	597.799	901.38	1140.22	1360.39
179.5	-38.5023	-33.2509	-19.2952	-19.6193	-10.5273	2.56702	59.67	186.865	366.785	606.708	905.958	1153.96	1363.35
180	-39.3646	-32.9463	-19.5666	-18.5729	-9.51875	3.59679	60.4801	187.236	375.957	614.324	916.404	1166.59	1364.77
180.5	-37.0077	-32.5146	-22.4939	-19.3731	-10.1345	4.4473	61.9031	187.812	381.141	621.589	915.989	1167.88	1363.12
181	-37.9887	-35.0635	-23.1443	-20.5653	-10.6086	4.77768	64.4519	189.099	386.751	631.598	914.737	1163.74	1360.91
181.5	-38.1615	-33.7483	-22.599	-19.059	-11.4719	4.39335	65.9161	196.125	387.988	633.854	915.399	1169.12	1364.46
182	-37.8046	-32.7304	-21.7264	-18.2546	-11.7483	4.67704	68.1966	200.703	391.199	636.389	918.851	1171.64	1368.21
182.5	-37.5044	-33.3732	-21.9534	-16.9167	-12.5596	4.62222	69.6469	205.383	395.129	645.013	921.14	1173.75	1377.82
183	-37.7717	-32.587	-22.6996	-18.2797	-11.1122	6.06409	69.0963	206.933	399.816	653.751	921.09	1175.22	1390.63
183.5	-37.6531	-31.5214	-22.3161	-17.407	-12.8348	7.52509	71.4066	208.716	403.274	662.027	926.096	1183.62	1392.1
184	-38.7253	-30.5978	-22.1049	-18.2801	-14.6486	8.26318	72.6569	210.304	404.812	662.187	929.126	1193.74	1392.77
184.5	-37.9215	-32.7325	-21.0362	-19.7505	-14.6548	9.36831	72.4894	212.838	407.024	662.139	935.164	1199.67	1397.94
185	-41.7362	-34.0049	-20.3723	-19.8737	-13.9494	6.7223	74.4344	213.406	412.452	667.406	939.985	1200.66	1400.33
185.5	-42.5251	-34.8392	-21.1523	-18.4025	-12.1176	5.30671	77.9652	216.909	418.614	676.131	935.439	1195.52	1404.57
186	-40.0237	-34.0726	-22.8603	-18.9487	-11.3013	7.19624	78.9815	219.137	421.456	686.633	939.128	1195.36	1410.95
186.5	-40.24	-34.4576	-21.7179	-19.091	-12.1473	9.05276	76.8241	217.318	423.517	693.155	936.982	1192.07	1421.35
187	-40.7586	-33.9024	-22.3681	-19.6035	-12.1509	9.41024	79.3218	213.168	425.265	699.612	935.615	1187.05	1427.43
187.5	-40.1506	-31.975	-22.4878	-19.6978	-12.3141	9.17642	83.3879	212.844	429.61	699.415	939.705	1190.29	1439.88
188	-41.7446	-33.0608	-22.1518	-18.2061	-12.1615	9.82631	85.6681	213.772	435.605	702.767	941.798	1196.81	1445.73
188.5	-39.7768	-33.2845	-22.4244	-19.7405	-10.4201	8.32572	83.8907	217.335	442.173	702.066	947.457	1208.87	1450.87
189	-39.0277	-30.9903	-21.6304	-20.437	-10.6954	8.73287	84.4323	216.029	447.291	705.277	947.622	1218.03	1454.52
189.5	-40.716	-28.4238	-21.7261	-20.7804	-10.0338	9.79278	87.8964	218.957	452.315	710.181	939.175	1221.1	1451.74
190	-38.1268	-29.7778	-21.9311	-20.2378	-10.8904	12.4561	86.2328	224.764	460.151	709.869	943.035	1219.72	1458.5
190.5	-36.7207	-30.89	-24.6243	-20.7624	-10.6162	11.725	83.0261	229.156	463.191	716.889	946.81	1235.11	1466.8
191	-36.5434	-31.7873	-24.5089	-21.0551	-10.2819	10.5528	85.5325	229.248	458.155	718.256	945.792	1247.44	1472.35
191.5	-37.8324	-32.381	-24.7714	-20.405	-9.49292	11.969	88.1362	231.306	455.706	719.091	948.244	1257.89	1463.7
192	-38.8564	-32.1958	-22.2523	-18.9114	-9.18083	13.1928	88.5721	234.717	458.293	723.115	963.358	1252.41	1464.62
192.5	-39.4685	-31.5227	-21.9412	-17.3518	-7.0418	12.8429	89.4559	238.451	462.738	727.529	966.63	1240.34	1463.38
193	-38.0666	-32.3584	-23.1292	-16.78	-10.6274	9.84723	92.0043	242.101	471.916	726.457	971.916	1241.66	1466.82
193.5	-40.17	-33.72	-22.5495	-17.1886	-10.521	8.93749	89.6649	243.877	475.428	727.288	977.568	1253.7	1472.56
194	-42.6485	-31.7657	-24.3736	-18.6315	-9.91492	9.5754	89.2285	241.108	478.916	732.177	982.635	1259.17	1473.12
194.5	-41.1361	-31.8635	-24.2553	-18.8027	-8.57504	10.3822	89.9848	241.082	482.235	732.327	989.816	1267.54	1477.66
195	-42.3848	-28.5782	-22.573	-19.208	-7.19284	11.644	91.2518	247.445	486.729	731.377	996.562	1278.33	1491.37
195.5	-39.9174	-28.9548	-22.3967	-20.2346	-8.3936	11.9978	91.6577	253.387	492.798	732.838	1005.85	1278.98	1499.52
196	-37.986	-29.9256	-24.0501	-19.8184	-6.99001	11.0583	91.974	257.778	494.956	742.45	1015.11	1277.96	1495.56
196.5	-39.0321	-30.2553	-23.3255	-19.6867	-6.12586	10.4365	92.3929	263.024	490.552	753.118	1020.52	1272.97	1493.11
197	-39.2393	-30.5705	-23.1493	-19.1499	-5.07167	11.6983	94.1332	265.186	485.946	763.539	1024.73	1276.76	1494.96
197.5	-37.7283	-32.0579	-22.4827	-19.2543	-6.298	14.2538	96.2765	267.051	489.768	775.116	1026.28	1277.13	1506.9
198	-37.964	-32.5763	-20.66	-18.4759	-7.54377	13.0737	93.6284	268.888	492.234	774.192	1034.32	1274.8	1517.14
198.5	-38.4604	-30.6677	-22.8854	-17.9026	-6.10091	13.0753	92.9591	267.337	497.259	776.919	1041.82	1282.26	1521
199	-39.545	-30.5106	-24.0676	-18.2009	-7.08736	10.6447	93.274	265.659	500.955	782.398	1049.17	1285.56	1515.59
199.5	-41.0014	-32.2257	-24.7629	-17.8601	-9.44843	9.2064	94.6775	268.146	502.404	785.881	1054.56	1281.36	1517.55
200	-41.0444	-30.833	-25.2811	-18.3086	-8.26772	9.01776	99.1464	270.932	501.982	787.719	1052.46	1285.45	1523.46
200.5	-40.0675	-29.7859	-24.2891	-19.1366	-10.1906	8.6485	100.682	268.805	504.526	791.157	1053.47	1286.9	1526.61
201	-39.5984	-29.65	-25.1285	-16.6966	-8.79864	10.1125	102.123	268.139	505.261	796.433	1052.16	1291.25	1529.12
201.5	-39.7207	-31.1142	-25.1639	-17.9413	-8.24535	12.3964	105.415	269.734	506.317	803.027	1052.26	1295.47	1532.46
202	-40.6127	-32.7976	-25.2809	-18.8534	-9.81511	13.0503	105.67	272.932	505.852	806.828	1069.97	1292.84	1537.17
202.5	-42.7976	-34.0963	-23.2523	-18.9557	-8.48315	12.6543	110.329	279.545	510.655	803.352	1085.47	1295.24	1538.92
203	-43.854	-33.7474	-23.6053	-20.0978	-6.88374	13.4684	109.304	285.217	514.767	799.384	1084.07	1295.8	1545
203.5	-42.5093	-33.3738	-23.6811	-20.1806	-8.18341	13.7957	109.166	285.995	520.208	793.146	1086.99	1297.89	1547.83
204	-42.8275	-32.9718	-21.5365	-19.4611	-8.27472	14.8189	109.747	285.813	529.773	796.299	1093.65	1305.89	1546.27
204.5	-41.7664	-32.1554	-22.7912	-17.0562	-9.75051	15.1599	109.967	285.906	535.242	809.49	1094.43	1311.2	1552.72
205	-40.4972	-33.575	-21.6614	-18.3057	-9.98449	15.8554	112.898	292.589	542.024	815.87	1099.1	1312.72	1563.6
205.5	-40.6899	-33.434	-22.3946	-22.1846	-10.621	18.3689	113.278	299.059	544.837	820.033	1107.65	1316.75	1577.93
206	-41.6549	-31.8434	-21.628	-20.4915	-10.1988	20.1788	114.153	298.973	543.189	826.292	1112.06	1318.3	1577.65
206.5	-40.813	-32.0766	-22.3305	-19.1781	-10.2285	20.3045	114.214	295.455	544.815	830.051	1115.37	1326.82	1574.72
207	-39.2252	-32.8894	-23.6085	-20.3244	-10.7441	17.9473	115.117	298.78	549.533	832.552	1117.42	1330.15	1579.13
207.5	-37.3931	-34.3335	-22.914	-18.9921	-9.99193	20.0494	115.325	298.197	553.306	830.194	1116.58	1335.09	1579.87
208	-41.2171	-33.4927	-20.7421	-18.5396	-9.74405	21.1355	115.281	298.342	557.549	831.42	1117.51	1341.98	1587.86
208.5	-40.4046	-31.0083	-21.2013	-18.5549	-9.10065	21.5547	112.488	298.924	560.075	825.922	1119.58	1346.08	1597.59
209	-39.6498	-30.9071	-21.0014	-20.8894	-10.9711	23.4175	114.924	302.669	558.881	824.25	1126.87	1349.53	1594.86
209.5	-40.02	-33.7513	-22.4384	-20.1719	-11.1913	21.6511	116.831	308.353	560.768	830.368	1134.36	1353.93	1598.3
210	-42.7957	-33.5691	-24.3024	-18.6236	-9.24673	21.9714	119.659	310.862	563.897	831.982	1129.56	1352.9	1603.24
210.5	-41.4128	-31.3006	-25.1937	-18.4135	-8.31959	20.0387	118.833	313.852	565.46	833.528	1128.07	1359.67	1604.92
211	-39.838	-33.156	-23.4479	-17.4035	-10.3503	21.7439	120.443	315.809	568.388	838.682	1135.54	1361.31	1608.04
211.5	-40.2136	-31.4687	-23.3953	-18.1327	-10.8651	24.0658	120.694	315.979	573.733	836.629	1136.07	1365.69	1612.91
212	-38.7743	-30.2393	-22.1211	-19.8092	-8.59474	20.441	122.705	323.177	576.569	843.352	1138.31	1363.78	1618.84
212.5	-39.8224	-31.8244	-21.6243	-20.46	-8.84847	19.4741	124.906	325.707	580.108	844.987	1146.34	1351.11	1611.66
213	-40.9674	-32.9503	-22.6628	-19.2267	-9.47648	19.9785	124.797	327.062	584.21	849.992	1149.55	1345.26	1617.72
213.5	-41.6571	-31.6904	-21.282	-18.5707	-8.71655	22.7383	126.06	329.373	587.112	851.536	1153.2	1346.45	1623.69
214	-42.8772	-31.2914	-22.4989	-18.3189	-8.06506	23.8923	128.15	333.926	587.817	858.77	1155.68	1353.23	1621.93
214.5	-42.9282	-29.8948	-22.9291	-16.4419	-9.01421	23.2186	131.36	332.891	590.24	868.538	1160	1354.32	1626.18
215	-41.3472	-31.1641	-22.4868	-15.3814	-9.68863	23.193	133.209	332.877	590.913	867.19	1161.72	1359.66	1636.56
215.5	-41.6304	-30.8828	-24.4167	-16.1646	-7.61803	23.4757	134.259	334.5	596.501	867.529	1160.05	1364.53	1630.97
216	-39.5298	-31.8957	-23.362	-17.2731	-9.94874	25.1499	134.043	339.498	600.794	866.181	1157.77	1367.47	1628.92
216.5	-39.0146	-33.2912	-23.6512	-17.4987	-9.42882	24.3123	135.248	339.967	599.355	871.003	1161.21	1370.66	1635.99
217	-40.3258	-32.7074	-23.3619	-17.6287	-9.17389	25.8683	138.52	343.105	600.524	876.618	1160.93	1375.08	1637.2
217.5	-40.8006	-33.0498	-25.0439	-16.0965	-9.8758	26.1434	139.515	343.549	601.789	887.428	1162.11	1371.82	1628.91
218	-41.3602	-32.4244	-23.2603	-16.4155	-10.9754	26.1068	138.745	345.702	602.878	893.453	1171.64	1368.92	1634.53
218.5	-42.3707	-31.652	-24.2624	-17.0681	-11.7965	27.3348	139.077	343.776	604.223	895.055	1178.68	1368.29	1642.45
219	-42.0122	-31.4485	-23.4902	-16.8218	-11.1179	27.8469	140.696	345.984	613.869	900.034	1179.39	1370.13	1647.82
219.5	-41.3229	-31.4831	-21.2958	-17.9752	-10.9812	29.4668	144.831	350.526	618.75	902.252	1176.86	1375.31	1643.39
220	-42.208	-33.0421	-21.6697	-17.2662	-10.3837	29.7092	149.793	353.038	615.05	900.205	1179.19	1382.76	1652.87
220.5	-39.9783	-34.3127	-22.7034	-17.1267	-8.00729	30.0798	153.209	353.219	613.958	903.973	1177.38	1398.22	1660.94
221	-40.6807	-33.3326	-22.4411	-18.0884	-5.93915	31.8742	154.048	351.091	622.703	908.425	1184.03	1404.8	1666.71
221.5	-43.8938	-33.1498	-19.4303	-18.4114	-6.86633	31.8772	156.768	349.455	627.928	911.018	1195.51	1407.05	1670.76
222	-42.1335	-34.3175	-20.884	-18.0195	-7.18229	29.8683	157.904	345.015	631.54	909.119	1203.94	1409.4	1669.84
222.5	-42.9281	-33.5879	-19.8145	-19.3327	-6.85607	31.8046	160.245	343.099	629.132	907.536	1205.9	1415.02	1686.16
223	-41.7787	-32.7343	-20.8581	-17.9023	-5.53525	34.2747	161.622	344.299	628.97	913.585	1201.64	1417.36	1694.43
223.5	-41.7907	-32.4785	-20.9712	-19.8068	-7.71593	32.7846	160.609	347.832	634.754	918.047	1201.26	1416.42	1702.62
224	-42.6579	-30.2281	-20.485	-19.3525	-6.87118	31.6668	159.46	352.569	635.029	917.018	1200.99	1414.28	1709.53
224.5	-42.4329	-32.1728	-21.1928	-18.5368	-7.06364	31.5498	161.868	359.389	635.641	919.461	1202.45	1413.81	1706.47
225	-41.4883	-33.7017	-20.8285	-17.4324	-5.48876	32.5361	163.05	362.355	645.153	918.096	1212.45	1420.78	1705.25
225.5	-42.9821	-33.5973	-20.6368	-15.4355	-7.65472	34.2511	163.003	364.856	648.433	913.54	1217.39	1426.71	1704.47
226	-42.7398	-33.0408	-22.1566	-18.6287	-5.15391	34.2098	164.954	364.246	647.939	912.886	1215.4	1423.28	1697.75
226.5	-41.5677	-31.5945	-21.1684	-18.7337	-5.96301	32.53	168.075	370.045	651.757	925.386	1219.69	1417.79	1694.22
227	-42.1912	-31.6986	-21.8703	-19.398	-6.3434	34.5739	168.293	368.472	656.333	925.176	1223.99	1416.37	1695.01
227.5	-41.2004	-32.8621	-22.2967	-18.7916	-8.14718	35.182	169.194	363.932	656.903	923.374	1235.5	1420.15	1701.93
228	-43.3956	-33.0329	-20.9203	-18.5097	-8.45442	34.8557	172.389	366.289	656.71	930.365	1239.83	1415.98	1692.81
228.5	-43.222	-31.9434	-21.2397	-19.6897	-7.12595	34.0493	173.955	367.849	657.176	935.164	1240.53	1416.16	1697.61
229	-43.3939	-32.0841	-21.9847	-19.6811	-4.40866	34.1123	174.727	370.477	660.492	944.734	1241.11	1417.04	1691.99
229.5	-42.8502	-32.5777	-22.5929	-18.1214	-6.27063	37.9239	175.845	378.289	668.258	952.97	1244.56	1430.22	1689.13
230	-41.9935	-32.9044	-22.825	-19.0574	-9.14753	40.5959	174.149	383.485	670.923	959.112	1247.55	1433.41	1693.48
230.5	-41.2755	-33.6389	-23.331	-19.5654	-7.20889	40.3566	174.637	382.519	672.957	967.335	1249.1	1429.53	1697.49
231	-39.8872	-29.9489	-23.8838	-19.2832	-5.62917	40.0174	173.501	379.034	677.036	967.171	1250.34	1432.2	1697.35
231.5	-41.0083	-29.1592	-22.8273	-17.4919	-6.07776	40.0717	173.839	384.255	673.952	962.235	1251.47	1435.1	1703.42
232	-42.8691	-29.6029	-22.9903	-16.333	-6.23252	38.6241	171.961	388.318	675.832	960.071	1253.65	1431.47	1706.32
232.5	-41.3763	-31.51	-20.7003	-16.7468	-4.93819	39.5579	171.839	384.203	689.045	968.641	1253.17	1431.83	1704.88
233	-41.6264	-31.479	-21.8666	-18.2243	-6.72244	40.1741	174.73	384.41	693.773	976.709	1259.49	1434.78	1706.03
233.5	-40.9983	-30.0199	-23.031	-16.8971	-5.54015	41.6358	176.951	384.899	692.692	981.873	1269.13	1437.48	1713.63
234	-39.737	-29.6151	-22.6138	-18.0042	-7.0886	42.181	180.042	388.877	696.572	980.467	1272.46	1437.12	1721.59
234.5	-37.7854	-30.4326	-23.3617	-17.5612	-8.68645	41.0339	179.187	394.123	699.393	983.685	1278.44	1441.73	1720.28
235	-39.3349	-31.4516	-23.3719	-18.8766	-7.90733	40.0082	178.395	399.306	695.689	984.388	1282.77	1444.21	1722.88
235.5	-38.865	-30.027	-21.7056	-17.538	-9.2401	38.0375	180.966	403.067	691.98	983.377	1279.59	1443.21	1717.68
236	-39.1022	-29.7004	-21.5686	-18.7504	-7.43902	38.3712	181.839	404.573	686.547	985.616	1274.64	1450.02	1722.72
236.5	-41.4014	-30.4557	-21.9192	-18.858	-6.30903	42.1812	185.038	404.835	690.477	991.573	1273.41	1449.33	1729.85
237	-42.5705	-30.7523	-24.3478	-17.564	-6.6353	43.6333	185.67	406.556	697.468	998.306	1271.65	1458.18	1732.63
237.5	-45.2905	-31.0012	-23.7819	-19.3184	-7.06106	45.1602	185.127	403.197	699.602	1004.16	1272.56	1469.73	1729.45
238	-45.1997	-30.0051	-22.9457	-18.3505	-5.9419	46.3439	187.222	402.704	702.815	1005.13	1272.21	1472.72	1727.22
238.5	-43.6428	-31.5933	-21.8124	-18.4995	-6.24479	45.8909	187.31	406.023	703.778	1006.51	1275.89	1467.28	1727.07
239	-42.6315	-33.2778	-20.8521	-18.4398	-6.56412	46.3042	187.631	413.336	706.305	1011.15	1272.89	1462.24	1725.38
239.5	-42.7156	-33.2643	-20.9444	-17.7816	-5.90229	48.906	188.408	418.555	709.238	1019.14	1282.46	1466.54	1726.78
240	-41.6877	-32.179	-21.2926	-18.3455	-5.05013	51.0424	188.949	418.161	711.369	1022.15	1282.65	1465.56	1726.04
240.5	-43.5902	-31.9502	-21.7544	-18.3107	-5.00029	51.0691	190.267	421.556	712.342	1019.52	1283.21	1458.07	1724.21
241	-41.1855	-30.17	-20.2013	-19.3646	-5.92204	50.2485	189.866	424.25	714.949	1013.5	1283	1453.84	1726.94
241.5	-41.5014	-32.0198	-20.021	-17.5693	-5.92789	48.5912	190.152	424.522	718.948	1009.35	1286.59	1452.77	1728.46
242	-43.2085	-32.9856	-20.8031	-19.0622	-7.45267	49.5489	192.075	428.868	718.488	1014.6	1296.58	1456.8	1718.87
242.5	-44.0188	-31.9178	-20.5665	-17.6217	-8.67552	50.5062	193.248	429.96	716.643	1019.27	1300.39	1464.32	1721.04
243	-42.5778	-31.2148	-23.5509	-18.3594	-7.53836	50.8251	195.691	428.584	719.427	1016.88	1299.77	1471.19	1724.04
243.5	-41.3536	-31.1253	-23.3118	-18.6566	-4.47577	50.4571	193.8	430.053	724.633	1024.94	1300.11	1470.12	1722.86
244	-42.4836	-30.3673	-24.2165	-18.425	-4.00043	51.136	195.361	427.97	730.484	1033.31	1300.65	1471.03	1716.34
244.5	-42.2241	-32.8577	-25.8016	-18.5642	-2.81041	51.7964	193.69	431.15	736.649	1041.82	1297.62	1464.2	1718.3
245	-41.8042	-32.3111	-24.4354	-18.0125	-3.90721	51.7138	192.224	432.989	744.021	1044.27	1293.17	1460.42	1725.28
245.5	-42.568	-32.9023	-23.0728	-19.699	-1.40958	51.829	190.367	437.018	747.705	1045.63	1296.6	1470.96	1721.32
246	-42.056	-32.7457	-22.3336	-20.559	-1.13839	52.4598	193.838	439.663	743.551	1044.04	1305.85	1477.86	1717.38
246.5	-42.0659	-31.0571	-23.7579	-20.8006	-1.84189	53.6193	198.227	436.789	745.425	1047.82	1305.13	1488.1	1725.39
247	-41.1344	-30.5927	-23.0432	-19.634	-2.18536	53.7774	201.65	437.565	748.275	1055.29	1306.63	1492.47	1724.29
247.5	-41.7852	-30.5315	-22.4594	-18.1505	-2.30549	55.1158	203.245	440.272	748.111	1067.73	1306.23	1492.6	1731.64
248	-41.9506	-29.3099	-25.0529	-18.8729	-4.17591	53.9997	205.807	436.889	747.702	1071.97	1302.03	1495.81	1735.77
248.5	-41.6116	-29.0819	-24.6105	-17.949	-1.91144	53.6369	205.119	436.431	752.962	1069.01	1300.8	1500.79	1745.65
249	-42.1132	-32.1137	-23.0979	-19.2358	-0.417398	55.4834	209.005	437.055	756.499	1071.87	1302.97	1502.68	1748.7
249.5	-42.188	-31.9748	-22.7623	-17.4624	-1.09599	55.5522	214.344	445.456	761.107	1071.7	1308.71	1508.24	1750.41
250	-42.252	-32.023	-23.0203	-18.341	-1.42328	55.327	215.144	450.707	762.652	1069.34	1307.9	1506.5	1752.77
250.5	-41.492	-32.4672	-22.4192	-19.6454	-1.82098	58.9359	214.066	455.32	763.106	1076.05	1316.85	1512.56	1757.23
251	-41.7141	-31.6798	-23.0598	-18.3458	-1.4059	57.302	215.774	459.171	764.768	1084.45	1320.74	1513.23	1755.62
251.5	-41.1357	-30.8627	-22.1504	-16.5843	-0.812383	57.817	218.782	454.523	772.819	1082.85	1327.15	1517.61	1756.8
252	-40.3789	-31.8532	-23.9718	-17.8017	-2.128	57.0006	218.113	454.144	773.663	1080.62	1331.74	1521.86	1754.71
252.5	-41.3479	-32.5769	-22.4981	-17.9469	-0.35261	57.0754	217.174	456.295	772.249	1074.33	1330.97	1524.56	1762.7
253	-42.3222	-32.2759	-22.1767	-19.5608	-0.628984	60.5131	217.705	456.544	767.74	1073.17	1331.33	1537.52	1770.5
253.5	-42.2241	-33.0497	-22.5606	-18.9833	-2.18153	62.9323	218.544	457.362	764.6	1071.82	1337.72	1542.46	1773.09
254	-40.9363	-32.7714	-21.2435	-18.1135	-2.25819	60.5681	222.402	457.393	768.785	1065.99	1346.53	1534.16	1761.09
254.5	-40.4767	-32.1776	-21.0264	-18.3269	-0.864452	60.8217	227.083	461.721	774.799	1060.59	1350.92	1527.91	1756.84
255	-41.4738	-33.333	-21.2144	-19.2281	-1.53863	63.1221	228.415	464.042	779.386	1064.51	1351.74	1521.8	1756.75
255.5	-40.2901	-31.8972	-21.8097	-19.2822	0.652429	65.4585	228.414	469.704	780.434	1064.13	1356.48	1526.04	1751.43
256	-39.6688	-32.6258	-24.339	-19.3828	0.703211	68.0311	227.385	474.673	783.204	1069.11	1362.35	1535.04	1762.12
256.5	-40.2341	-32.5995	-22.8259	-18.7795	0.713714	67.3667	224.157	479.746	783.23	1076.34	1365.16	1538.1	1767.59
257	-40.7577	-33.4316	-23.4116	-19.8399	1.65066	68.064	219.327	482.94	789.726	1074.99	1358.77	1538.47	1772.44
257.5	-39.0982	-33.7388	-22.4629	-19.8278	-0.444881	69.049	222.753	479.107	796.247	1073.37	1359.12	1539.63	1783.47
258	-37.994	-34.3329	-23.1518	-19.6504	-0.937001	66.3795	226.446	477.388	797.02	1078.67	1368.89	1536.34	1788.75
258.5	-39.5277	-33.0458	-22.7463	-18.1846	0.248753	66.7248	230.063	478.936	797.486	1081.28	1374.9	1531.3	1788.95
259	-41.8905	-31.7149	-22.2277	-17.4724	-1.18893	69.0766	234.13	481.868	799.622	1075.37	1379.8	1533.19	1781.54
259.5	-40.9636	-32.4683	-24.0935	-20.4711	-1.7087	70.3123	230.896	483.971	807.726	1072.69	1379.2	1536.9	1782.94
260	-39.4432	-33.1301	-22.6725	-20.891	-2.6417	69.5043	233.435	482.458	812.161	1081.59	1378.66	1539.52	1788.6
260.5	-39.4127	-33.8183	-24.3156	-21.1458	-1.93332	67.4493	231.415	484.59	809.477	1091.24	1382.61	1544.65	1785.36
261	-41.168	-33.514	-24.6625	-19.25	-2.9916	66.5408	230.93	486.551	808.227	1092.21	1390.83	1555.27	1787.47
261.5	-39.1464	-35.2368	-22.7484	-18.4969	-3.23777	63.0564	234.658	486.67	805.487	1083.64	1399.51	1560.66	1785.66
262	-38.9394	-33.1613	-22.6415	-18.748	-4.2596	63.9326	235.468	487.085	807.241	1089.58	1403.97	1564.03	1788.58
262.5	-40.083	-30.3127	-23.5399	-18.9104	-2.85299	63.8839	234.734	485.026	806.842	1094.88	1399.39	1569.36	1784.46
263	-41.1224	-30.5209	-22.2878	-18.8532	-1.10163	64.3777	235.403	486.02	813.703	1089.92	1395.23	1576.2	1781.28
263.5	-38.629	-32.4131	-23.9065	-19.4006	-2.08234	65.2708	235.408	493.274	817.142	1087.84	1395.77	1566.24	1770.88
264	-38.6778	-31.9786	-24.0263	-19.8587	-2.24858	66.6467	237.313	496.747	818.887	1087.12	1400.67	1563.38	1770.02
264.5	-40.5433	-31.092	-24.2426	-20.7419	-2.30664	70.1062	239.613	499.273	815.271	1087.72	1400.37	1570.45	1782.65
265	-41.7063	-32.021	-24.6335	-19.4876	-1.5335	71.4324	242.972	502.328	821.343	1092.85	1401.22	1576.35	1797.38
265.5	-41.8771	-31.6944	-25.7932	-18.5301	-2.66602	73.456	244.323	504.388	836.677	1100.36	1396.66	1574.98	1808.47
266	-42.0417	-31.8457	-25.4542	-18.9427	-2.30746	73.3982	243.465	506.8	847.53	1111.86	1399.87	1570.66	1815.19
266.5	-41.8949	-29.9353	-24.4961	-19.5053	-1.14258	73.0401	244.726	511.96	847.604	1112.46	1401.18	1570.43	1818.05
267	-42.4163	-30.8351	-23.9558	-18.9608	-1.91329	74.9369	243.982	513.157	845.236	1114.48	1401.26	1565.59	1817.32
267.5	-41.1508	-31.0432	-23.0007	-20.2689	-1.82968	76.5246	243.819	516.809	850.541	1119.01	1402.68	1568	1818.68
268	-41.4166	-33.1169	-21.1346	-19.6754	-2.39944	74.3479	244.915	521.27	855.148	1115.25	1395.79	1573.81	1819.76
268.5	-40.7018	-32.4593	-21.135	-20.2961	-4.68853	74.2092	248.988	522.423	854.702	1113.73	1398.35	1574.79	1828.39
269	-42.3109	-33.2603	-20.7958	-17.8272	-4.48491	76.7166	250.43	524.314	847.305	1118.27	1402.23	1582.98	1820.26
269.5	-40.9258	-32.3071	-21.7206	-18.8208	-3.33118	75.9567	251.41	523.278	846.375	1125.76	1399.27	1580.42	1813.6
270	-39.644	-32.8062	-21.6562	-20.4103	-2.77381	73.3149	255.384	523.933	847.352	1127.52	1393.73	1577.1	1817.6
270.5	-39.9621	-33.3119	-23.8636	-19.1486	-2.01326	75.1895	252.487	528.551	849.147	1124.95	1396.94	1577.47	1821.87
271	-40.008	-34.4902	-22.2621	-19.4765	-0.992174	78.0753	249.136	534.862	853.669	1127.45	1399.22	1580.09	1825.63
271.5	-38.9624	-33.9132	-24.0012	-18.7977	-0.143877	80.6559	251.042	537.302	857.478	1141.58	1393.69	1581.35	1829.83
272	-39.8557	-33.5414	-23.603	-19.1722	-0.864111	80.565	250.69	542.901	855.316	1149.73	1382.14	1590.39	1829.69
272.5	-39.8475	-32.755	-23.5588	-19.8786	-2.08088	78.8446	247.928	547.296	854.035	1144.45	1393.09	1600.83	1832.35
273	-40.047	-33.1814	-23.397	-20.3911	-0.285983	78.8191	245.26	549.884	860.386	1139.13	1397.37	1604.14	1832.61
273.5	-41.071	-34.8545	-23.6557	-20.4002	-0.0464863	79.662	246.375	550.963	867.051	1144.57	1400.09	1605.6	1832.68
274	-39.2952	-33.4894	-23.0412	-20.5829	-0.106343	82.1392	248.329	554.754	863.009	1137.7	1400.12	1606.65	1833.32
274.5	-38.9237	-35.2819	-21.0006	-20.5102	-1.008	82.3512	251.285	558.641	860.834	1141.34	1401.09	1602.05	1831.67
275	-39.2976	-32.9992	-22.5064	-21.0019	-1.77903	82.9852	254.546	560.47	862.973	1145.74	1405.72	1601.16	1834.48
275.5	-38.7723	-29.919	-23.3029	-19.7881	-1.00837	85.9997	256.817	566.507	867.138	1147.09	1404.75	1601.08	1840.57
276	-37.3047	-30.7471	-24.61	-18.094	-0.63377	88.1634	254.639	574.119	867.814	1151.09	1403.58	1606.04	1845.66
276.5	-38.9331	-31.5857	-24.6602	-18.0969	-0.71727	87.0446	253.929	574.978	870.989	1154.45	1404.99	1614.09	1850.14
277	-40.6824	-31.9944	-26.4926	-19.2283	-1.82631	86.4047	262.291	572.808	878.656	1153.03	1411.86	1621.69	1843.96
277.5	-40.9093	-30.0657	-23.8566	-20.6917	-1.05161	86.2343	267.741	574.407	880.522	1156.85	1418.63	1623.04	1843.14
278	-40.3559	-28.5755	-22.4795	-19.1526	-0.913267	87.6755	268.603	575.672	886.783	1158.56	1424.67	1621.35	1840.49
278.5	-40.5967	-30.3986	-22.846	-21.09	-1.69112	88.116	268.798	577.837	891.311	1159.11	1424.97	1624.05	1831.19
279	-42.1202	-30.3989	-24.9632	-21.2787	-1.2435	87.6031	267.467	582.227	893.513	1162.02	1420.84	1628.36	1832.61
279.5	-41.0249	-30.2494	-24.3948	-20.8816	1.00451	90.4742	267.884	584.166	896.269	1167.11	1419.32	1644.39	1841.21
280	-38.6145	-28.7471	-25.8323	-19.5225	1.88297	90.0586	268.979	587.156	899.9	1163.78	1422.72	1646.22	1844.4
280.5	-39.5618	-30.1479	-24.3017	-19.4938	1.25126	88.6356	271.373	592.641	905.149	1158.12	1426.03	1643.69	1842.39
281	-41.5399	-28.5657	-24.888	-18.391	1.56265	85.5149	271.969	597.763	909.096	1160	1432.27	1643.79	1840.5
281.5	-42.1564	-27.2999	-24.0006	-17.3932	1.01244	86.4577	271.658	601.589	916.788	1162.81	1435.21	1647.74	1837.11
282	-41.4126	-28.5299	-24.0611	-17.3161	-0.758892	87.3603	274.572	600.859	921.948	1162.45	1440.88	1650.48	1835.62
282.5	-41.0016	-27.4227	-24.8666	-19.2486	-1.19765	89.3866	277.199	603.243	929.562	1157.61	1444.21	1655	1836.55
283	-41.7279	-28.3147	-25.5647	-19.1676	-0.634601	91.4854	275.398	608.527	934.17	1156.42	1448.64	1657.19	1846.75
283.5	-41.1151	-28.2337	-22.7495	-16.957	-0.353544	91.4645	275.892	610.574	937.423	1157.07	1453.62	1656.78	1853.95
284	-43.2349	-28.6975	-23.9599	-16.9104	-0.584594	91.8897	279.995	609.079	937.44	1164.73	1454.42	1653.44	1849.23
284.5	-41.3102	-29.7887	-23.2201	-18.7516	-2.08428	91.2508	282.117	610.317	935.338	1178.87	1456.79	1648.08	1849.86
285	-42.2905	-29.3574	-22.3588	-19.1418	-1.8856	92.0186	284.621	611.141	927.542	1182.72	1452.17	1652.33	1850.76
285.5	-41.6533	-28.1009	-22.2511	-17.2079	-0.754759	91.034	283.898	609.148	926.243	1182.75	1450.59	1650.62	1851.16
286	-39.8908	-28.7733	-24.9908	-15.3343	-1.11343	92.6238	286.161	610.213	923.945	1189.55	1454.36	1649.04	1848.74
286.5	-41.028	-30.5754	-24.5394	-17.0956	-0.334414	92.7633	288.957	611.51	921.058	1194.64	1458.17	1654.12	1847.41
287	-41.4897	-29.3141	-24.3705	-16.2052	0.275016	94.699	291.679	611.677	921.304	1190.63	1462.79	1662.07	1850.61
287.5	-43.6279	-28.3052	-24.0409	-16.1425	0.825602	97.3702	289.912	612.185	926.275	1188.8	1457.31	1659.15	1849.65
288	-43.0169	-30.3151	-24.5817	-17.4361	1.4721	97.4734	290.911	607.229	932.643	1182.19	1452.73	1658.71	1847.93
288.5	-43.6016	-31.4783	-23.5301	-17.6334	0.631912	98.1968	293.066	606.37	933.996	1182.24	1457.41	1660.32	1849.54
289	-41.8875	-31.0329	-22.4434	-17.2736	-1.46378	98.0365	293.875	608.887	935.405	1188.66	1457.71	1672.57	1852.72
289.5	-40.6896	-31.1743	-23.0722	-15.9396	-1.44736	95.379	295.816	613.787	935.435	1190.8	1448.28	1682.88	1851.98
290	-39.5705	-30.8836	-23.6768	-16.5284	-0.0691494	96.1757	296.429	612.76	941.656	1187.51	1445.24	1682.37	1847.04
290.5	-39.8433	-30.5703	-22.8049	-17.5742	1.71493	96.0511	299.424	614.104	944.999	1190.99	1449.72	1681.46	1845.06
291	-40.7066	-31.3097	-21.2413	-17.6122	2.35837	97.2004	301.94	617.232	945.81	1196.13	1452.89	1683.21	1847.34
291.5	-38.2837	-30.5878	-21.1447	-18.0478	3.15234	96.2013	302.887	616.006	950.609	1195.68	1445.36	1687.28	1849.54
292	-37.4887	-30.4992	-20.6156	-17.7807	0.494314	95.7483	301.875	618.342	952.848	1187.48	1442.72	1694.66	1848.51
292.5	-37.9714	-30.6567	-21.8341	-16.7757	0.471822	96.3137	306.613	621.284	948.132	1185.17	1450.66	1695.37	1851.64
293	-40.0384	-30.4169	-20.7755	-17.5827	1.36673	96.8202	312.02	621.523	944.323	1183.81	1462.22	1689.13	1845.21
293.5	-39.3141	-30.117	-21.8658	-18.5363	-0.245669	99.1729	310.457	623.419	947.976	1194.14	1465.9	1679.69	1840.09
294	-38.8115	-31.2687	-21.6301	-17.87	0.394961	99.4555	309.779	623.251	953.134	1205.24	1468.13	1671.56	1834.43
294.5	-38.2769	-30.7319	-24.2352	-16.8885	0.908823	100.274	307.857	619.422	960.958	1207.79	1471.36	1666.53	1828.34
295	-39.4951	-30.8669	-23.6192	-16.1928	2.78235	97.8404	306.681	620.695	963.103	1213.06	1468.42	1660.08	1830.51
295.5	-40.9401	-35.5125	-22.3432	-16.2502	1.86313	96.237	309.882	623.469	964.245	1214.54	1463.8	1657.08	1835.46
296	-39.9576	-36.023	-22.3409	-17.9334	1.5876	98.142	310.789	622.347	965.845	1213.67	1463.89	1651.8	1842.03
296.5	-37.9645	-32.6207	-22.9924	-18.3378	4.40187	96.67	310.972	623.964	967.053	1218.37	1460.23	1644.83	1840.4
297	-39.3504	-32.5566	-24.9813	-16.3379	3.56825	95.2869	312.825	626.302	965.371	1218.56	1462.94	1642.6	1836.13
297.5	-40.6763	-31.1323	-23.0559	-16.0679	4.97547	96.5876	312.928	629.363	962.752	1225.16	1460.94	1640.26	1848.69
298	-38.9512	-31.4636	-22.3892	-15.6729	2.90334	95.0617	314.683	634.289	960.211	1224.67	1462.89	1652.47	1865.62
298.5	-39.1784	-31.6122	-22.6922	-16.8449	2.6371	95.7948	314.416	633.344	959.44	1223.07	1460.67	1659.26	1863.08
299	-40.1261	-31.2566	-22.5849	-15.8815	2.15605	97.4586	316.88	631.993	960.099	1227.97	1454.8	1666.47	1860.73
299.5	-41.4353	-32.3672	-22.7116	-16.0139	1.95549	101.065	315.819	634.19	957.123	1233.34	1455.39	1663.23	1862.65
300	-40.0986	-30.5804	-24.7025	-17.2346	1.69392	103.053	317.721	633.14	961.932	1236.08	1466.48	1656	1861.52
300.5	-41.9364	-32.9682	-23.3533	-17.0141	1.00384	103.762	318.335	631.212	965.306	1239.12	1471.6	1659.28	1861.9
301	-41.4753	-33.158	-23.1859	-17.5219	0.913621	103.827	318.537	636.318	972.284	1240.63	1474.2	1662.6	1858.27
301.5	-40.6538	-32.1987	-22.3156	-17.688	0.324022	102.94	319.334	640.344	981.408	1240.84	1476.28	1666.22	1860.41
302	-39.7122	-33.6989	-22.3989	-17.7026	-0.0391394	103.413	319.489	641.575	979.533	1250.45	1480.01	1667.06	1871.61
302.5	-41.3353	-34.0027	-22.2806	-16.6167	-0.504648	104.331	320.099	642.481	973.821	1255.62	1481.97	1671.02	1874.69
303	-40.5276	-33.8288	-22.3483	-15.4978	0.207784	105.299	316.505	640.527	979.094	1253.48	1482.7	1670.13	1876.16
303.5	-40.1818	-34.6182	-19.8348	-16.2838	0.436456	105.028	316.166	637.944	983.105	1250.41	1478.68	1671.05	1880.82
304	-41.3472	-35.8938	-22.2244	-16.7647	-0.075353	105.634	314.124	640.596	980.267	1249.99	1471.82	1668.11	1879.4
304.5	-41.3748	-34.5595	-20.9281	-18.0727	1.32217	104.369	312.713	644.814	975.522	1245.43	1469.86	1672.8	1874.99
305	-41.0939	-32.1297	-19.8545	-17.7388	2.83161	107.654	316.902	649.004	973.507	1243.03	1464.4	1681.03	1881.15
305.5	-41.5912	-33.0479	-18.2448	-18.311	3.97167	108.049	321.852	651.809	972.719	1240.52	1457.06	1679.21	1895.28
306	-41.3493	-33.7189	-18.2484	-17.3924	2.46987	109.589	326.861	654.887	973.936	1246.63	1455.5	1669.64	1910.44
306.5	-40.3724	-32.0717	-20.3232	-19.2527	3.18226	109.884	327.702	652.62	976.535	1253.74	1455.68	1664.27	1904.18
307	-40.9532	-32.7862	-23.382	-20.7652	2.08504	110.606	326.368	645.035	982.108	1252.87	1462.88	1676.94	1902.2
307.5	-39.8161	-31.6444	-23.0559	-18.3149	0.170209	111.009	326.201	648.763	976.814	1252.74	1471.7	1682.17	1898.32
308	-40.7407	-32.2116	-21.6808	-18.6634	2.20218	109.557	329.831	653.838	971.336	1255.78	1471.72	1680.24	1899.25
308.5	-37.6591	-32.148	-21.4008	-20.3646	2.83019	107.835	327.982	649.579	972.676	1260.97	1470.54	1680.71	1900.47
309	-36.104	-33.1962	-21.41	-18.8417	4.35659	108.423	332.469	648.482	981.304	1260.91	1474.03	1678.92	1894.6
309.5	-38.0634	-33.5227	-22.3422	-17.696	5.14225	108.88	333.405	650.937	985.672	1258.81	1473.21	1675.15	1894.41
310	-38.6111	-33.1464	-22.3957	-18.3863	4.73469	106.477	335.349	652.413	984.47	1262.5	1479.18	1674.64	1886.44
310.5	-37.8867	-33.2433	-20.9413	-17.7046	6.19342	104.072	334.16	650.446	985.57	1272.09	1486.66	1673.83	1882.21
311	-39.1719	-31.262	-20.7341	-16.6792	4.95094	104.107	333.037	655.269	983.519	1279.15	1486.73	1667.68	1877.62
311.5	-39.1295	-32.2628	-20.3679	-17.3701	4.91518	107.511	333.017	662.129	979.956	1276.51	1485.52	1665.02	1881.64
312	-40.8904	-31.4295	-20.6581	-16.4953	4.35388	110.3	330.158	666.482	981.607	1278.3	1485.6	1663.67	1881.71
312.5	-39.4918	-31.8088	-21.519	-16.6208	5.18199	111.112	330.811	670.695	980.485	1279.05	1487.61	1659.86	1874.92
313	-38.8696	-32.7358	-22.2792	-15.8728	4.73591	110.271	326.207	669.566	973.859	1281.57	1492.93	1663.97	1881.88
313.5	-38.727	-31.1673	-22.5014	-17.2778	4.56935	111.341	328.242	670.037	975.129	1279.33	1488.58	1672.95	1884.38
314	-38.8389	-32.3767	-22.9891	-16.7238	3.98057	111.731	329.418	672.312	976.897	1276.15	1480.84	1677.48	1887.51
314.5	-39.7253	-32.7796	-20.2505	-15.5784	3.84173	110.377	329.455	673.909	979.099	1273.1	1491.41	1675.18	1890.13
315	-40.5884	-32.8645	-22.675	-15.5272	4.92457	110.217	329.759	673.487	988.85	1273.69	1497.35	1675.7	1892.97
315.5	-43.3228	-33.2724	-22.4934	-16.856	3.76495	109.909	330.886	672.718	992.46	1274.09	1494.74	1678.29	1896.41
316	-42.0012	-31.3898	-24.4737	-16.1309	3.60388	108.721	332.76	672.461	990.246	1271.21	1501.34	1678.09	1896.54
316.5	-39.9041	-30.9696	-23.3554	-14.8358	3.20652	107.124	336.569	671.211	990.182	1272.75	1507.09	1674.95	1895.5
317	-40.3671	-31.4004	-23.5842	-16.0483	2.40792	107.304	336.455	670.233	998.873	1272.84	1504.79	1678.36	1900.87
317.5	-40.1385	-30.8829	-22.74	-17.1513	3.44053	110.182	332.684	668.438	1004.37	1272.36	1508.37	1691.05	1907.09
318	-39.0105	-30.4102	-21.4088	-16.6533	3.06647	110.071	329.975	668.212	1003.62	1273.49	1512.36	1694.39	1901.49
318.5	-37.8858	-29.2673	-23.7621	-19.4443	3.94599	109.327	326.447	673.788	1010.18	1275.21	1505.6	1686.85	1903.99
319	-40.7945	-30.4965	-23.6969	-19.1573	3.25007	108.634	324.258	678.8	1016.67	1273.52	1502.54	1682.09	1902.52
319.5	-41.823	-30.5161	-23.5423	-19.2162	2.90825	107.417	329.037	680.412	1019.15	1281.07	1497.34	1685.29	1906.08
320	-41.5666	-30.4918	-21.2609	-19.174	4.0921	105.064	333.371	680.784	1020.04	1284.38	1496.51	1691.39	1909.23
320.5	-38.384	-31.9523	-21.447	-18.9539	2.22845	104.783	334.994	680.136	1015.34	1276.48	1498.44	1692.69	1900.75
321	-39.7132	-32.2492	-23.1597	-17.3131	2.64489	108.213	336.136	673.184	1010.82	1273.87	1497.74	1685.46	1898.07
321.5	-38.2811	-31.9804	-22.6287	-17.1118	4.48071	110.158	336.083	673.557	1010.29	1275.13	1504.3	1679.17	1916.86
322	-36.2927	-31.7189	-21.5167	-18.286	4.04014	110.429	333.117	674.415	1006.73	1274.47	1517.76	1674.11	1914.92
322.5	-40.632	-30.678	-22.1254	-17.2479	3.98872	111.829	334.277	675.941	1010.47	1281.67	1523.56	1673.26	1915.56
323	-42.1505	-30.6486	-21.5696	-19.2885	3.45073	113.243	337.776	676.678	1012.15	1290.61	1525.56	1679.76	1915.96
323.5	-43.391	-31.5294	-20.2152	-19.0947	4.52851	113.685	337.756	675.418	1009.64	1293.31	1528	1683.22	1917.93
324	-43.2578	-30.946	-20.5385	-18.4452	2.20185	111.008	340.295	678.488	1014.49	1290.89	1524.11	1684.22	1913.78
324.5	-42.7993	-30.7696	-21.6689	-18.1852	2.25582	112.578	343.04	682.674	1010.59	1279.33	1518.42	1685.23	1910.05
325	-41.3341	-31.2456	-21.1858	-19.3881	4.70483	113.828	345.563	680.163	1007.29	1275.52	1517.82	1686.85	1901.16
325.5	-41.2335	-31.4087	-22.3572	-18.8797	4.56224	113.276	352.199	674.322	1013.26	1274.87	1529.8	1690.48	1893.03
326	-40.4274	-30.9207	-23.7856	-18.3364	4.08375	111.497	352.524	671.31	1016.76	1276.62	1540.16	1693.54	1894.86
326.5	-38.9482	-30.1421	-22.5015	-17.431	4.36466	113.542	350.464	678.124	1016.33	1281.51	1542.04	1697.27	1903.54
327	-36.6373	-30.301	-21.6836	-18.4077	4.5847	112.309	351.054	689.256	1019.94	1283.57	1533.19	1695.34	1906.94
327.5	-36.8748	-30.0458	-21.474	-19.5873	5.28186	110.523	351.147	692.215	1029.83	1283.81	1533.93	1684.21	1910.74
328	-37.5813	-28.9536	-21.066	-19.6285	5.36541	113.197	351.435	694.789	1033.47	1287.72	1537.94	1684.7	1907.68
328.5	-36.465	-29.8945	-21.5051	-17.8059	7.44877	113.541	353.582	695.107	1036.66	1290.75	1535.17	1684.06	1910.77
329	-35.8541	-30.1927	-23.1585	-16.668	8.69744	113.064	354.51	695.174	1031.85	1291.66	1537.5	1682.9	1905.43
329.5	-36.2168	-30.5655	-23.6091	-18.4345	6.38436	116.078	353.516	691.103	1031.39	1285.07	1541.36	1684.74	1901.72
330	-37.0047	-28.5271	-22.6229	-21.4744	4.96807	116.545	354.929	691.222	1029.7	1285.87	1540.51	1685.92	1898.84
330.5	-37.1045	-30.0926	-22.8793	-20.4583	5.51135	113.995	358.697	692.093	1024.14	1289.14	1530.91	1691.17	1892.8
331	-37.294	-28.8395	-22.2992	-18.2544	4.62082	114.035	360.394	687.646	1018.89	1290.32	1531.88	1696.22	1887.48
331.5	-36.6374	-30.0089	-21.7727	-17.4473	4.86314	111.237	359.049	686.578	1021.01	1296.39	1534.12	1696.56	1882.82
332	-37.674	-29.9138	-22.0168	-15.4404	6.71243	113.046	355.323	689.801	1028.12	1300.23	1535.08	1694.93	1879.11
332.5	-39.6078	-28.8092	-20.9525	-15.4088	4.30764	116.031	354.84	689.343	1028.07	1302.74	1540.62	1697.92	1880.33
333	-39.055	-29.4651	-21.755	-18.5215	6.59546	116.019	356.182	689.406	1023.89	1303.64	1540.1	1699.71	1879.89
333.5	-41.6006	-30.233	-21.801	-17.3488	6.72915	115.181	356.166	686.796	1026.87	1300.1	1532.57	1693.51	1877.07
334	-40.6105	-32.1488	-21.0726	-17.3617	4.20746	113.763	358.258	684.094	1023.99	1302.82	1528.91	1693.75	1872.68
334.5	-39.1808	-32.5201	-20.4532	-16.7751	5.07495	113.98	358.513	679.448	1018.96	1305.68	1528.56	1697.81	1874.25
335	-39.5242	-32.5188	-20.8038	-18.4798	5.38501	113.11	364.27	681.698	1020.82	1303.59	1528.14	1692.53	1872.45
335.5	-39.5935	-31.5319	-21.1832	-16.9753	6.69465	113.479	371.657	685.704	1026.34	1307.24	1523.01	1684.98	1871.49
336	-39.1613	-32.5497	-21.22	-16.6596	5.62818	114.062	372.929	686.21	1032.73	1302.88	1521.45	1687.67	1873.46
336.5	-38.302	-32.6073	-21.0502	-16.6502	4.08773	115.219	372.208	684.625	1032.99	1306.09	1525.49	1694.66	1873.15
337	-38.195	-32.1899	-20.7544	-18.6488	3.73616	115.599	371.666	688.145	1041.04	1313.74	1528.32	1689.46	1868.81
337.5	-37.1721	-32.8405	-19.9395	-16.7231	4.28951	115.887	371.113	695.636	1040.73	1323.18	1526.16	1692.03	1869.85
338	-36.7869	-32.5669	-19.7938	-16.4905	5.47549	119.415	370.258	700.597	1039.43	1321.1	1524.13	1695.53	1875.03
338.5	-37.0702	-32.6133	-18.2463	-16.9702	6.67626	121.806	371.347	703.187	1037.2	1318.28	1519.21	1697.91	1878.91
339	-36.5175	-32.7568	-17.4357	-18.0491	7.05426	123.098	376.029	707.041	1037.92	1321.32	1508.07	1694.49	1886.3
339.5	-37.0268	-33.3564	-17.9964	-17.063	5.47288	124.124	376.41	709.366	1043.42	1319.48	1509.62	1698.04	1890.84
340	-36.2922	-31.5258	-18.2423	-17.2462	7.99154	123.866	379.881	709.226	1050.62	1320.01	1523.57	1697.62	1889.21
340.5	-35.9612	-32.2409	-21.2598	-18.4288	8.00323	123.591	380.138	706.813	1055.3	1325.25	1525.4	1684.91	1890.2
341	-37.277	-32.2726	-22.4682	-19.636	6.87844	122.055	379.988	706.367	1060.67	1334.33	1525.36	1682.5	1878.25
341.5	-37.2672	-31.3448	-23.8182	-18.882	7.13312	121.887	380.946	705.68	1063.84	1333.3	1521.74	1680.79	1877.32
342	-37.3046	-32.2406	-24.0558	-20.789	5.68779	122.616	382.208	709.566	1061.56	1328.03	1524.81	1678.96	1883.02
342.5	-39.2923	-33.718	-22.9604	-19.2345	6.98874	123.027	382.891	720.417	1067.48	1329.89	1523.34	1681	1885.15
343	-39.6846	-34.9263	-26.0262	-18.751	6.78616	123.256	382.253	729.131	1067.78	1328.03	1524.76	1677.02	1884.47
343.5	-37.4764	-35.0067	-24.6441	-18.4947	8.36221	125.323	374.52	728.177	1063.74	1333.5	1527.74	1680.44	1885.24
344	-38.8691	-34.8475	-24.2686	-18.1454	9.6364	124.441	369.92	727.403	1063.23	1341.47	1525.14	1688.41	1889.69
344.5	-38.0159	-34.3779	-23.878	-19.1493	11.0213	122.771	370.663	724.857	1060.71	1346.01	1528.33	1695.31	1889.23
345	-34.6555	-32.8173	-23.6447	-19.5263	10.6621	125.292	372.184	721.815	1056.95	1350.49	1529.56	1696.55	1895.33
345.5	-35.0147	-32.737	-22.4374	-18.4349	11.6639	126.371	375.292	715.252	1059.52	1352.17	1533.68	1695.42	1896.53
346	-37.386	-31.6333	-23.5992	-16.9154	12.4161	128.181	376	708.86	1059.58	1354.03	1530.95	1699.41	1897.36
346.5	-36.6912	-32.1272	-24.4264	-18.348	12.9567	126.908	379.961	706.113	1054.05	1354.8	1529.02	1701.41	1902.07
347	-37.5292	-32.4463	-24.6618	-16.8141	11.0618	126.24	380.166	709.119	1050.99	1355.68	1522.13	1708.03	1901.09
347.5	-39.4887	-31.7447	-22.4795	-19.5004	9.93811	128.499	380.39	716.194	1045.71	1354.09	1513.5	1708.49	1914.01
348	-37.9863	-31.25	-21.0447	-18.6752	9.46937	129.402	382.931	721.166	1045.27	1355.07	1514.03	1699.66	1922.12
348.5	-36.4934	-32.5243	-22.6217	-17.7388	9.48173	132.776	385.585	723.435	1048.88	1357.2	1508.77	1691.84	1924.2
349	-36.6736	-30.3049	-22.9153	-16.7766	10.385	134.274	386.195	717.595	1041.56	1361.96	1504.15	1700.87	1921.94
349.5	-37.2443	-32.015	-24.9871	-16.7928	11.1395	134.236	386.235	720.214	1043.3	1359.99	1497.94	1705.56	1912.68
350	-39.7588	-33.6665	-24.1978	-18.2402	8.94207	133.149	381.607	718.583	1051.57	1362.55	1497.07	1712.75	1909.51
350.5	-40.2911	-33.7428	-22.5227	-18.5796	9.83871	133.469	380.449	720.463	1057.08	1361.47	1498.08	1721.42	1909.5
351	-39.5545	-33.0164	-25.1137	-18.5444	9.75332	134.511	377.937	719.033	1060.9	1369.46	1483.61	1727.48	1912.65
351.5	-39.4969	-32.3134	-24.7993	-17.581	9.44431	133.25	376.49	723.778	1067.81	1367.97	1482.76	1727.87	1922
352	-38.7609	-33.3176	-24.0728	-17.3792	10.5253	132.309	374.546	726.989	1065.85	1368.77	1486.2	1732.54	1925.88
352.5	-39.0382	-32.0265	-23.8613	-16.5229	10.2726	129.92	376.586	724.481	1064.06	1360.68	1480.95	1738.34	1918.22
353	-39.0254	-31.7362	-22.581	-17.1607	9.53237	130.696	376.146	726.371	1060.86	1359.27	1489.29	1736.95	1924.61
353.5	-39.175	-31.5191	-22.6024	-19.1952	10.8309	131.654	374.502	726.227	1061.55	1366.57	1495.45	1735.82	1938.81
354	-38.3948	-33.1205	-21.8856	-19.7881	12.1779	130.441	377.348	724.491	1061.38	1370	1499.37	1736.43	1943.67
354.5	-36.3806	-33.1608	-22.288	-20.1687	12.5303	132.415	379.212	723.666	1063.37	1372.62	1500.71	1736.3	1934.06
355	-36.7074	-34.7028	-22.2109	-18.3525	13.6856	134.435	383.5	725.087	1065.22	1371.1	1505.48	1737.28	1929.95
355.5	-37.2334	-33.954	-20.1585	-17.2848	14.7936	136.171	385.118	721.508	1062.37	1368.72	1504.19	1738.13	1929.18
356	-38.1599	-33.0295	-19.5981	-18.3605	12.5792	135.324	382.246	720.066	1061.78	1369.93	1500.74	1742.23	1927.44
356.5	-40.0113	-33.753	-19.8851	-18.8254	13.1333	136.781	385.168	721.512	1062.37	1373.31	1502.01	1750.4	1928.15
357	-39.2908	-35.8688	-19.0366	-17.5057	13.2704	137.562	383.644	716.779	1068.33	1364.77	1505.09	1745.75	1919.35
357.5	-37.2178	-33.9937	-18.9735	-16.8733	13.9603	138.477	382.954	716.673	1066.43	1359.64	1507.46	1740.09	1906.66
358	-36.8003	-33.1712	-19.55	-19.094	13.6196	137.22	381.534	722.001	1057.6	1358.06	1514.16	1746.51	1909.37
358.5	-37.34	-32.7575	-20.6995	-19.0086	11.5743	135.215	385.989	729.397	1058.22	1355.2	1510.7	1758.31	1920.48
359	-38.1855	-32.5007	-20.0739	-19.1684	11.9026	138.389	389.932	727.689	1061.48	1354.68	1500.25	1769.61	1918.3
359.5	-38.7574	-34.2381	-20.1533	-18.7917	13.3089	140.736	390.085	728.28	1061.46	1351.57	1508.91	1779.12	1901.53
360	-39.5429	-35.7058	-20.8614	-17.8756	13.6445	143.377	393.138	736.306	1063.82	1353.65	1497.79	1775.57	1893.07
360.5	-40.146	-34.1988	-22.1833	-17.5536	14.7945	144.36	396.71	741.244	1069.1	1349.76	1487.23	1775.04	1886.83
361	-39.2331	-32.4414	-22.3331	-18.323	16.3257	142.977	403.776	746.092	1071.36	1345.66	1482.09	1772.23	1875.17
361.5	-39.1852	-30.843	-20.6169	-17.996	14.564	142.935	406.116	747.842	1079.13	1338.65	1487.82	1763.56	1876.81
362	-37.6628	-30.0862	-20.6616	-17.3184	15.3679	143.601	406.584	750.879	1086.45	1337.26	1488.72	1759.52	1878.03
362.5	-38.2262	-30.2301	-21.1341	-17.1776	16.0307	142.699	410.865	755.355	1083.71	1336.1	1495.91	1761.97	1884.84
363	-40.9084	-31.4291	-21.3765	-16.6873	16.6048	140.954	413.749	755.707	1078.63	1340.05	1490.13	1772.52	1888.09
363.5	-42.2641	-31.4821	-20.5659	-17.536	14.1344	142.531	414.359	756.495	1080.49	1340.87	1497.15	1776.71	1890.33
364	-42.3563	-32.4498	-22.2966	-18.0858	14.7355	146.029	411.924	751.723	1083.85	1342.86	1511.26	1769.67	1894.53
364.5	-41.9715	-32.0239	-19.8893	-16.5158	13.4071	146.786	415.436	753.49	1079.58	1333.56	1514.4	1763.31	1905.1
365	-40.742	-33.1222	-21.0752	-16.2756	13.8182	143.013	419.926	754.311	1079.98	1337.17	1509.12	1769.53	1924.54
365.5	-40.9877	-33.1658	-23.4311	-17.7402	16.7459	138.718	419.733	755.468	1083.87	1345.69	1506.39	1767.4	1933.15
366	-39.9062	-34.1899	-24.0971	-16.9121	16.5248	141.823	421.654	752.868	1085.17	1353.02	1506.61	1764.75	1929.69
366.5	-39.8176	-33.8912	-24.0578	-16.1102	17.4158	142.224	423.418	753.223	1082.27	1356.37	1514.33	1767.17	1925.55
367	-39.8831	-33.9138	-25.418	-17.0194	17.5829	144.422	427.727	751.428	1090.98	1353.24	1518.09	1771	1936.85
367.5	-39.4439	-33.3857	-24.6117	-15.2024	15.0509	143.446	425.428	758.419	1095.55	1358.77	1523.83	1773.25	1937.09
368	-38.7443	-33.2172	-23.9702	-15.698	14.9275	144.101	423.616	762.145	1094.33	1364.57	1523.6	1763.43	1937.61
368.5	-38.1118	-33.9644	-23.8081	-16.1252	15.1477	145.744	428.756	763.846	1088.69	1367.44	1520.87	1760.71	1945.24
369	-39.525	-31.4529	-23.3563	-15.9688	17.0423	149.241	430.267	769.736	1081.78	1370.37	1523.09	1762.69	1939.42
369.5	-39.9004	-30.4602	-22.418	-15.8283	17.156	151.771	430.248	772.621	1074.23	1367.93	1528.91	1769.13	1936.39
370	-41.3218	-29.7763	-21.5871	-18.7405	16.7058	154.946	430.217	770.421	1072.57	1364.62	1526.9	1772.11	1942.79
370.5	-41.6177	-30.5871	-22.7183	-18.2903	15.4171	155.846	429.481	769.388	1076.1	1365.88	1524.28	1760.87	1951.82
371	-41.6294	-28.2959	-21.8776	-17.0881	15.0302	155.919	433.878	769.547	1073.45	1367.6	1528.55	1763.93	1948.71
371.5	-41.5902	-28.308	-22.3135	-17.1941	17.1414	155.069	432.809	770.852	1073.24	1369.59	1535.6	1764.22	1951.94
372	-41.6636	-29.3103	-20.9212	-18.6895	15.7641	154.122	430.677	770.351	1073.75	1372.66	1541.63	1759.09	1947.66
372.5	-39.9337	-31.5568	-19.4135	-19.2568	15.1665	157.145	425.741	770.944	1073	1376.42	1550.24	1758.69	1950.11
373	-39.6495	-32.3367	-16.7465	-19.8167	16.8851	158.267	422.67	776.856	1072.9	1374.5	1547.42	1766.4	1956.08
373.5	-41.2961	-31.0535	-17.7412	-20.633	15.6849	157.804	425.543	780.342	1076.55	1372.19	1546.2	1768.3	1948.88
374	-41.4956	-32.4553	-20.426	-19.9149	14.3772	157.087	427.977	782.461	1075.83	1368.57	1546	1756.13	1949.09
374.5	-39.2678	-32.6719	-21.619	-20.2534	18.5514	157.643	434.976	788.039	1076.9	1374.43	1548.33	1753.71	1944.76
375	-37.5628	-32.6076	-22.2655	-19.0676	21.7434	157.728	434.644	786.581	1077.4	1380.24	1552.54	1747.18	1938.47
375.5	-38.4701	-32.4086	-21.7678	-20.9864	19.7965	156.291	433.556	785.754	1077.81	1388.3	1560.87	1742.03	1943.31
376	-37.7999	-32.417	-21.3488	-19.6811	19.3766	153.428	433.662	785.424	1086.68	1393.54	1567.91	1743.81	1954.05
376.5	-36.5433	-33.2781	-21.5061	-18.2482	20.1501	153.908	433.838	788.11	1088.85	1396.44	1567.18	1748.98	1952.39
377	-34.6423	-32.6433	-21.5759	-16.714	18.1063	151.518	434.589	788.396	1095.23	1398.65	1558.28	1748.37	1949.86
377.5	-37.1381	-33.2149	-22.2944	-17.8652	16.1655	150.794	434.464	791.825	1095.88	1400.9	1556.05	1750.03	1946.51
378	-35.8354	-34.5971	-22.0652	-18.5176	15.7705	152.239	437.92	792.702	1090.67	1405.61	1561.74	1756.94	1938.99
378.5	-34.8418	-33.7559	-21.9782	-18.0091	17.6324	150.97	437.917	791.289	1095.73	1406.12	1563.57	1759.37	1930.67
379	-36.2737	-33.446	-21.1499	-18.8426	17.939	149.483	437.313	786.738	1092.64	1407.37	1567.26	1764.75	1923.32
379.5	-34.8216	-34.0579	-20.915	-21.1276	19.3919	148.84	438.923	782.794	1088.51	1409.84	1570.82	1758.8	1919.45
380	-35.7914	-32.9713	-22.9535	-20.0311	18.5422	148.067	441.09	785.284	1090.97	1414.11	1565.9	1754.42	1917.17
380.5	-36.8927	-33.0413	-23.2144	-17.6397	17.7059	146.927	441.49	786.437	1091.16	1407.78	1569.14	1759.45	1914.95
381	-35.8471	-33.8758	-22.5456	-17.407	19.6233	150.67	442.443	788.094	1088.19	1402.23	1571.94	1758.3	1915.51
381.5	-36.2916	-31.6926	-24.6084	-18.2758	20.6361	152.659	444.599	791.529	1087.49	1406.62	1571.43	1751.97	1920.4
382	-39.5456	-32.0575	-23.2429	-17.6549	21.2275	154.533	445.045	792.12	1088.66	1404.68	1570.8	1751.71	1926.89
382.5	-39.6314	-31.2806	-22.7725	-17.4825	20.1996	157.732	447.395	795.491	1090.24	1402.06	1570.6	1757.47	1931.54
383	-38.0488	-29.3924	-23.9367	-17.6165	20.5408	156.371	449.864	801.161	1084.41	1406.61	1574.13	1757.74	1931.75
383.5	-38.7314	-29.3093	-25.4822	-18.6715	19.8686	155.2	448.868	806.216	1081.35	1414.51	1580.59	1757.9	1940.97
384	-41.2122	-31.6241	-23.3646	-16.4758	18.2057	155.12	446.972	804.632	1081.2	1414.7	1577.42	1762.83	1950.93
384.5	-39.5129	-32.9635	-24.0386	-15.5268	17.5898	155.351	446.016	799.503	1086.28	1411.34	1585.02	1768.55	1954.6
385	-41.1033	-34.5528	-24.4513	-16.0945	17.3794	156.397	443.992	800.682	1082.11	1406.29	1585.18	1769.34	1952.91
385.5	-41.0259	-33.3659	-23.6041	-17.0736	16.9661	159.925	443.76	798.473	1075.73	1406.13	1582.79	1776.53	1951.05
386	-40.578	-32.3938	-25.5135	-17.4217	17.8636	158.332	445.603	797.509	1074.47	1414.69	1583.99	1784.65	1943.16
386.5	-41.8046	-33.6882	-23.7626	-16.4826	17.2525	158.129	445.174	794.963	1073.38	1420.65	1581.64	1780.73	1945.68
387	-40.5623	-33.7637	-22.7756	-16.6661	17.7341	158.433	447.155	792.935	1076.34	1425.78	1584.33	1780.11	1951.55
387.5	-40.9517	-32.6572	-24.5272	-15.7145	18.4638	158.296	448.12	794.629	1081.84	1422.84	1579.27	1786.09	1958.92
388	-39.1736	-34.8125	-22.3539	-15.1274	19.7554	156.698	448.334	796.945	1087.76	1411.01	1573.54	1787.23	1965.88
388.5	-38.885	-35.0523	-21.2387	-16.1951	20.5965	157.865	452.728	792.839	1087.5	1412.47	1571.21	1779.43	1972.12
389	-39.5203	-31.9662	-21.3529	-17.7504	22.984	158.97	453.19	795.393	1087.62	1420.58	1578.1	1778.78	1973.38
389.5	-39.7782	-32.0868	-23.9552	-17.3361	22.5311	154.618	449.299	793.707	1086.29	1423.28	1581.76	1782.81	1967.88
390	-39.7235	-31.1461	-22.2212	-17.0564	21.7961	153.776	450.038	794.393	1090.87	1416.14	1581.8	1785.63	1962.46
390.5	-39.1683	-32.4001	-24.0069	-17.8119	24.1691	154.627	450.808	794.614	1100.81	1408.42	1593.69	1783.18	1962.35
391	-37.6008	-31.2669	-24.3294	-19.1765	22.7915	152.734	451.524	794.278	1097.94	1410.78	1597.23	1786.87	1966.67
391.5	-38.2233	-31.8816	-23.7335	-18.1463	22.6221	148.993	451.631	795.884	1094.3	1399.94	1602.27	1788.61	1970.14
392	-36.5205	-32.9701	-22.9969	-17.2117	21.4804	150.125	451.684	801.674	1104.95	1395.29	1609.64	1784.94	1971.41
392.5	-39.2196	-33.1461	-23.0748	-17.496	20.4349	148.202	456.003	800.027	1111.98	1404.22	1606.78	1778.7	1972.34
393	-37.6912	-33.7475	-22.8105	-18.0833	19.911	149.797	454.25	796.617	1110.95	1412.9	1604.06	1776.36	1978.64
393.5	-37.9698	-34.5776	-23.8018	-18.4049	20.0955	149.352	450.773	791.391	1105.87	1416.92	1595.49	1775.55	1986.37
394	-36.7159	-35.1073	-23.0364	-18.5273	22.6721	154.528	452.799	793.34	1105.77	1405.94	1590.18	1775.22	1992.32
394.5	-35.6674	-35.6945	-23.4666	-19.3869	23.7497	158.047	449.759	796.496	1105.29	1396.28	1584.41	1772.08	1989.79
395	-35.8248	-36.1661	-24.2381	-19.618	23.6142	157.659	448.044	792.456	1107.45	1397.77	1573.11	1768.91	1994.04
395.5	-36.8102	-36.5237	-25.2767	-18.607	20.7613	158.149	448.209	797.777	1109.49	1405.87	1576.17	1765.39	2007.71
396	-36.4092	-34.6302	-25.7481	-18.6862	22.8427	158.116	450.182	799.814	1114.31	1403.55	1573.78	1764.36	2017.56
396.5	-36.3675	-35.1447	-25.5442	-18.4179	22.6521	157.86	453.713	795.295	1117.98	1399.98	1568.86	1762.16	2029.82
397	-38.1977	-34.9402	-25.1027	-16.9331	22.7789	157.355	457.868	801.09	1121.41	1393.25	1570.21	1759.16	2040.4
397.5	-38.3024	-34.0285	-25.6284	-17.9074	23.9518	158.913	454.099	807.964	1117.83	1388.99	1574	1763.9	2037
398	-37.8029	-33.5264	-27.0279	-17.7708	21.2471	159.556	453.498	811.496	1109.32	1397.71	1581.61	1765.42	2031.86
398.5	-39.357	-33.9742	-25.5835	-17.5947	19.2671	160.615	456.918	805.905	1109.22	1401.88	1587.52	1764.89	2032.33
399	-38.6734	-36.6818	-23.8031	-17.7786	17.4944	160.215	458.629	803.108	1115.07	1408.8	1588.84	1762.04	2033.04
399.5	-39.7241	-35.0302	-22.7826	-17.8419	17.3812	162.183	457.888	811.087	1119.8	1410.38	1590.59	1763.84	2033.9
400	-39.1778	-33.826	-24.6788	-18.9652	16.4984	162.038	459.892	816.74	1122.92	1404.9	1590.97	1769.35	2028.95
400.5	-38.3176	-33.1999	-23.4825	-15.4329	16.0823	162.268	460.267	815.748	1125.28	1401.38	1583.69	1768.42	2027.66
401	-37.9248	-34.8582	-24.856	-15.1998	15.7071	162.942	461.189	815.397	1124.36	1402.66	1580.19	1758.29	2031.81
401.5	-40.3383	-33.4249	-24.9288	-17.0126	16.6125	163.291	458.317	818.085	1121.83	1395.29	1577.11	1764.67	2035.42
402	-40.0762	-32.8882	-23.0575	-18.4922	15.1868	166.814	461.342	814.296	1121.26	1391.54	1582.83	1764.05	2025.98
402.5	-40.4923	-34.607	-22.0303	-17.5109	16.1866	168.156	458.325	813.446	1128.67	1396.53	1591.01	1766.19	2018.71
403	-39.1683	-35.0838	-22.2463	-15.6407	17.8298	169.326	453.502	815.008	1130.51	1400.4	1581.61	1767.6	2012.27
403.5	-40.5383	-34.6836	-23.6819	-16.1379	16.8985	168.963	458.062	819.618	1121.88	1409.67	1576.71	1766.69	2013.37
404	-41.2757	-34.4786	-25.3337	-16.1057	17.3367	166.986	459.825	823.527	1123.76	1411.85	1579.48	1762.86	2016.42
404.5	-41.6259	-35.1812	-24.2056	-16.037	18.247	165.049	459.782	828.976	1123.8	1410.39	1573.99	1758.31	2017.26
405	-40.9631	-35.941	-21.4349	-15.0715	19.9476	165.667	463.38	832.442	1118.82	1409.25	1563.72	1753.04	2006.33
405.5	-39.8886	-34.1908	-21.6435	-17.3916	21.3538	163.327	462.975	834.92	1110.04	1402.96	1557	1752.28	2000.45
406	-39.2174	-34.2398	-22.9432	-16.7819	21.3991	165.216	463.469	829.57	1101.64	1399.04	1564	1758.92	1998.27
406.5	-40.432	-34.2914	-20.6114	-16.8875	20.9412	168.844	464.767	829.899	1103.1	1395.51	1573.71	1765.1	2007.86
407	-42.3389	-34.6102	-23.0263	-17.4675	19.8861	170.323	461.667	824.965	1108.29	1387.81	1584.68	1768.91	2009.59
407.5	-37.4974	-34.2523	-22.0616	-17.6499	19.262	169.936	462.849	817.442	1111.01	1375.57	1588.4	1775.37	2001.47
408	-35.7674	-33.4759	-22.555	-17.3356	17.8353	168.658	466.016	819.804	1111.32	1376.2	1587.45	1770.6	1998.74
408.5	-37.1043	-32.2132	-21.0141	-18.5332	17.314	170.126	466.856	826.797	1113.15	1379.04	1587.13	1762.09	2000.27
409	-36.2491	-33.7308	-23.539	-16.7627	16.47	168.243	466.497	828.041	1114.64	1386.16	1587.94	1756.31	1999.82
409.5	-37.5013	-34.1259	-23.7296	-17.7103	17.8844	167.77	469.258	829	1117.48	1384.99	1587.13	1760.13	2008.12
410	-38.3317	-34.0978	-22.362	-17.5069	19.7128	170.063	469.441	836.465	1119.37	1382.51	1585.97	1767.08	2012.38
410.5	-38.1675	-33.4719	-22.1097	-16.9527	19.1505	168.506	469.053	835.619	1119.74	1383.52	1588.58	1772.52	2008.79
411	-36.5125	-33.4897	-20.2451	-17.5157	16.7252	171.872	468.597	833.538	1118.58	1384.7	1583.75	1767.85	2003.02
411.5	-37.2146	-35.2693	-19.3362	-20.6248	16.7227	168.667	465.018	829.825	1113.5	1393.81	1578.49	1766.02	1997.13
412	-37.479	-36.0236	-20.7209	-19.4717	18.0077	168.931	462.894	829.307	1113.02	1399.12	1576.67	1767.27	1993.72
412.5	-38.3476	-34.7442	-22.3774	-19.2327	19.4864	169.391	464.317	829.521	1112.02	1397.75	1579.77	1759.29	1987.18
413	-37.9246	-36.9205	-21.895	-18.3794	18.7762	168.016	467.297	824.929	1115.05	1393.96	1580.87	1760.56	1987.86
413.5	-38.241	-35.2694	-22.1291	-17.3398	19.9112	168.432	470.341	823.25	1119.28	1390.16	1581.11	1768.3	1989.51
414	-39.4892	-34.7227	-23.2795	-17.3549	19.6061	166.619	471.985	822.825	1120.22	1391.82	1586.79	1763.17	1991.43
414.5	-40.4533	-35.011	-24.0748	-18.7736	19.671	166.606	472.489	826.371	1119.89	1391.05	1589.46	1754.66	1990.12
415	-39.8411	-35.4175	-22.7637	-17.8801	20.6666	167.525	480.169	828.52	1117.77	1394.47	1596.8	1747.7	1987.95
415.5	-39.0034	-36.0398	-23.0913	-17.9288	21.7989	167.276	484.778	832.035	1116.04	1400.46	1599.7	1750.36	1994.36
416	-39.7459	-34.9494	-22.8302	-18.5167	21.1691	165.542	484.437	838.332	1116.96	1405.44	1605.6	1751.37	2002.14
416.5	-40.9371	-34.6964	-21.3235	-17.9563	19.0157	166.946	481.244	842.271	1115.4	1411.18	1611.29	1767.5	1999.23
417	-40.4133	-33.3028	-21.8179	-18.108	20.1876	170.615	480.134	844.566	1116.9	1409.62	1615.17	1773.78	1999.27
417.5	-41.8232	-33.1292	-22.5811	-17.4202	18.3645	173.474	480.706	839.616	1119.57	1403.94	1613.03	1774.82	1998.15
418	-38.3299	-34.8552	-23.3066	-17.3735	18.5729	173.236	479.168	837.514	1116.76	1398.39	1604.41	1771.13	2002.11
418.5	-37.9428	-37.6633	-21.8154	-19.1516	18.0386	174.116	479.096	846.26	1120.12	1391.6	1595.19	1768.25	2000.98
419	-38.4925	-37.5685	-22.3674	-19.1796	15.6698	175.725	482.05	844.835	1121.26	1391.16	1595.2	1767.83	1991.81
419.5	-39.3686	-38.9656	-22.8619	-18.5416	14.0261	174.124	483.459	846.497	1126.14	1399.01	1592.91	1766.56	1996.45
420	-38.752	-37.5316	-22.8062	-21.2958	14.3891	172.347	483.25	844.961	1129.24	1391.68	1591.1	1762.96	2006.89
420.5	-39.1202	-35.817	-23.176	-20.3241	16.286	174.7	482.4	842.623	1127.02	1383.05	1592.48	1762.67	2003.68
421	-41.5928	-33.3142	-24.2039	-18.5657	16.5088	175.835	482.531	840.323	1125.73	1383.3	1596.62	1764.47	1999.08
421.5	-41.0478	-32.5181	-23.7759	-17.6279	16.9475	176.25	486.197	840.459	1132.14	1387.06	1593.78	1767.5	1996.98
422	-40.7319	-35.3047	-23.2831	-16.4916	16.4892	174.339	489.963	848.023	1136.14	1395.96	1594.18	1776.36	1986.28
422.5	-40.352	-37.0847	-23.3149	-18.1004	16.9266	175.222	491.181	852.991	1138.47	1403.91	1597.23	1776.69	1984.54
423	-39.858	-36.321	-21.9248	-20.2787	15.6685	172.998	489.711	849.913	1135.96	1403.58	1595.38	1769.12	1980.93
423.5	-41.1872	-34.1184	-22.3861	-19.4537	16.9277	170.329	486.609	851.457	1141.62	1398.1	1601.92	1757.28	1987.94
424	-41.2493	-33.5313	-23.2396	-17.7122	18.6283	170.82	484.832	851.614	1144.77	1392.46	1599.04	1760.47	1996.82
424.5	-39.6074	-33.2136	-21.9174	-18.1559	21.5596	171.858	485.078	855.433	1150.51	1393.38	1589.43	1754.67	1992.66
425	-38.7087	-32.9459	-21.8747	-18.2591	20.5193	170.291	483.616	863.079	1157.98	1391.91	1588.09	1755.7	1982.85
425.5	-39.7713	-35.9669	-21.6562	-17.8777	21.2726	169.422	485.334	871.842	1156.74	1389.43	1582.41	1761.98	1982
426	-40.1398	-35.8966	-21.1748	-16.5763	20.9084	169.107	486.562	875.292	1150.19	1389.3	1584.65	1759.21	1985.38
426.5	-41.9792	-36.5475	-22.6003	-16.9089	21.9471	170.33	485.205	874.232	1148.31	1394.98	1589.71	1757.38	1983.39
427	-40.6438	-35.2934	-22.9619	-18.5827	21.5801	170.735	484.593	872.745	1152.09	1393.34	1597.05	1758.72	1977.25
427.5	-38.3761	-37.3357	-23.0166	-17.3944	22.517	169.217	486.316	871.021	1156.32	1393.59	1593.56	1769.04	1978.21
428	-39.0087	-37.2631	-24.9734	-15.6098	21.0527	168.152	490.617	867.096	1155.31	1393.62	1586.22	1768.33	1975.55
428.5	-37.9729	-35.8011	-23.8161	-15.8896	21.7142	169.794	491.582	870.964	1157.61	1390.11	1584.77	1767.35	1986.82
429	-38.791	-33.9482	-24.1315	-16.8571	21.2932	170.145	490.878	872.803	1160.43	1388.24	1589.99	1767.37	1989.91
429.5	-39.3638	-34.174	-24.06	-15.4688	21.2719	167.372	491.721	874.549	1158.24	1391.99	1595.81	1765.77	1989.28
430	-38.847	-33.6928	-24.5491	-15.8054	21.6915	167.826	492.39	877.375	1161.28	1390.38	1604.79	1763.11	1982.46
430.5	-39.3156	-32.4388	-24.1221	-16.1258	22.4544	169.223	496.794	881.741	1162.24	1387.9	1607.34	1765.21	1978.39
431	-42.1339	-35.7331	-22.052	-17.3759	23.3271	170.756	497.713	885.022	1157.36	1388.45	1600.28	1772.22	1988.06
431.5	-42.8703	-36.3747	-21.3242	-17.5399	23.0704	171.727	500.37	880.972	1155.03	1389.51	1597.88	1770.52	1987.52
432	-40.3008	-34.1953	-23.4907	-16.7067	21.2864	173.149	497.834	874.618	1158.63	1388.94	1601.62	1767.15	1981.13
432.5	-39.5469	-31.9934	-23.9279	-16.4309	20.079	172.012	501.339	870.279	1158.86	1388.4	1597.18	1767.13	1982.76
433	-39.3095	-32.5423	-23.325	-15.4327	19.4599	171.406	505.657	871.152	1161.57	1393.66	1596.39	1767.83	1987.83
433.5	-38.9001	-34.1859	-22.598	-15.5576	21.1274	169.891	503.097	865.57	1161.03	1389.34	1592.59	1770.54	1989.94
434	-39.2972	-34.4142	-22.9405	-16.0468	21.8023	171.088	500.486	872.785	1156.23	1392.21	1584.47	1768.27	1980.75
434.5	-40.2076	-35.2999	-22.4893	-15.1972	18.0072	171.098	499.638	879.967	1159.08	1397.85	1578.78	1763.77	1970.75
435	-41.277	-35.5547	-22.3953	-16.2753	18.8266	167.76	499.348	882.583	1156.5	1407.92	1583.57	1763.87	1967.97
435.5	-39.2803	-35.8325	-20.4086	-16.6701	20.9629	168.518	501.378	880.59	1156.63	1408.06	1581.93	1759.37	1971.91
436	-38.5218	-36.7688	-21.047	-16.0852	22.2279	169.294	500.083	880.287	1161.61	1405.72	1593.77	1764.39	1965.42
436.5	-40.7366	-37.2934	-19.9256	-16.9684	22.2492	170.595	502.39	877.192	1162.51	1398.43	1602.92	1767.75	1961.33
437	-40.1537	-38.2737	-22.6607	-16.5245	20.1959	173.079	502.271	879.251	1166.07	1399.06	1600.19	1762.94	1958.23
437.5	-39.3312	-37.386	-23.1198	-18.6186	20.6748	173.464	502.686	880.623	1166.65	1399.33	1602.91	1762.61	1961.25
438	-39.6775	-38.0353	-22.1249	-19.2965	21.0446	174.354	508.952	880.329	1163.69	1396.29	1612.91	1764.95	1967.65
438.5	-41.4548	-38.4295	-22.2801	-17.9245	20.8323	176.343	511.907	881.804	1157.04	1395.85	1611.81	1765.44	1975.62
439	-39.149	-36.5407	-22.5445	-18.4583	20.0766	174.976	510.74	884.707	1154.08	1392.98	1615.8	1757.68	1982.79
439.5	-38.862	-36.6886	-21.049	-16.6317	20.1119	176.99	512.106	891.46	1152.52	1385.02	1619.88	1753.33	1979.78
440	-37.2278	-36.4148	-21.6753	-18.5292	20.5494	178.45	513.317	895.769	1149.3	1380.83	1621.89	1754.38	1978.3
440.5	-40.4403	-37.8031	-21.4806	-19.2835	21.7704	179.138	510.119	895.449	1149.72	1374.83	1618.01	1760.02	1986.71
441	-37.2249	-36.5638	-21.2051	-18.9548	19.3363	176.075	509.609	891.403	1152.55	1374.71	1616.08	1760.7	1996.39
441.5	-37.6256	-35.8598	-22.3731	-18.0221	20.233	177.16	511.043	885.437	1157.35	1380.59	1623.14	1754.75	2005.45
442	-39.0885	-36.2131	-22.8127	-17.9202	21.763	179.608	514.619	880.417	1157.83	1387.98	1624.25	1758.29	2008.13
442.5	-40.2504	-35.4944	-22.7269	-18.3147	21.773	178.467	514.41	882.395	1161.53	1398.76	1615.78	1762.08	2016.33
443	-38.8268	-33.5007	-23.1443	-17.6988	23.0015	176.662	512.747	882.961	1166.68	1397.87	1611.41	1759.2	2018.88
443.5	-36.2395	-34.2253	-21.8041	-18.0963	22.8548	179.163	511.522	880.875	1174.04	1401.86	1609.27	1763.94	2015.36
444	-37.3413	-36.5174	-22.3987	-19.179	22.2159	181.93	508.465	875.345	1176.08	1402.87	1607.76	1767.73	2006.28
444.5	-38.1021	-35.8443	-23.3131	-18.7455	22.5889	185.559	507.008	876.186	1173.23	1395.91	1607.2	1763.95	2005.95
445	-38.2101	-35.5451	-21.8878	-16.6804	22.568	185.695	503.634	878.976	1177.68	1398.32	1605.54	1766.69	2013.83
445.5	-37.3672	-35.2638	-23.2897	-17.5754	23.2767	187.356	502.978	881.34	1176.86	1393.83	1607.82	1767.1	2013.18
446	-37.036	-32.425	-24.1786	-20.4544	22.1353	190.436	501.256	876.56	1174.49	1393.9	1604.47	1766.33	2010.09
446.5	-39.1438	-32.1749	-25.8727	-19.2562	24.6169	188.692	498.719	879.085	1173.5	1394.88	1600.4	1769.11	2018.47
447	-38.4864	-31.5852	-26.3887	-17.61	27.5928	190.06	501.484	884.916	1176.99	1396.54	1599.4	1776.79	2014.84
447.5	-37.3679	-33.0612	-26.274	-16.8902	26.7692	187.905	506.582	887.508	1176.19	1396.94	1599.93	1776.69	2010.65
448	-37.5998	-33.2622	-25.9827	-18.0328	23.8833	187.77	510.688	884.979	1176.23	1391.04	1593.9	1776.21	2010.54
448.5	-39.4434	-34.0233	-25.1149	-19.2924	22.1267	188.75	515.676	882.821	1177.84	1388.07	1588.67	1781.74	2012.32
449	-38.398	-33.2959	-24.3977	-20.2174	22.5907	193.283	516.458	884.39	1174.81	1396.47	1590.2	1781.03	2012.55
449.5	-38.6407	-33.8312	-23.7393	-19.4844	23.5182	192.991	516.301	890.174	1170.41	1402.91	1597.87	1779.62	2012.77
450	-39.0641	-33.5725	-22.2013	-18.0639	23.567	193.08	514.067	894.958	1172.14	1403.32	1595.41	1787.43	2016.84
450.5	-37.9592	-34.1648	-20.9374	-18.0657	22.3908	194.357	515.534	892.501	1172.81	1397.04	1598.18	1797.41	2016.23
451	-39.2038	-35.0707	-22.9075	-17.0882	23.0454	195.697	513.875	893.767	1169.18	1402.49	1604.61	1801.63	2024.3
451.5	-37.796	-33.9567	-23.6711	-16.6172	22.5175	196.247	514.721	902.525	1168.69	1404.33	1605.1	1807.79	2025.42
452	-38.5783	-33.8557	-22.9272	-18.9287	20.62	194.016	515.685	903.25	1174.3	1405.65	1611.38	1809	2017.48
452.5	-38.349	-33.0287	-22.8568	-21.9004	23.0999	193.589	517.138	902.371	1170.18	1410.89	1613.33	1814.89	2012.48
453	-40.1798	-31.8824	-20.8123	-19.8474	22.902	194.817	517.081	902.009	1171.89	1414.28	1612.16	1817.21	2016.36
453.5	-41.8537	-32.9977	-21.0226	-18.3962	21.9749	196.775	519.031	900.411	1173.75	1417.68	1613.78	1812.64	2025.02
454	-41.5629	-31.8963	-23.0623	-18.5235	23.2812	197.068	523.925	899.532	1165.72	1427.91	1612.76	1813.57	2028.57
454.5	-40.792	-32.7582	-22.5228	-19.4596	22.9798	200.269	525.241	901.159	1169.62	1437.9	1606.27	1808.25	2030.25
455	-40.0346	-34.0989	-20.1168	-19.5521	21.7193	202.859	523.483	904.069	1172.47	1436.82	1608.57	1801.21	2025.84
455.5	-40.4623	-34.4371	-21.3779	-18.7945	22.083	202.339	524.36	904.153	1172.84	1436.9	1616.13	1796.49	2018.35
456	-40.5424	-32.0895	-21.7022	-18.0707	23.5575	201.729	522.995	898.015	1176.66	1432.08	1619.88	1790.04	2010.11
456.5	-39.0048	-31.2282	-23.5074	-18.1622	23.6269	200.281	519.337	892.894	1178.21	1419.9	1621.88	1782.76	2010.97
457	-40.1324	-33.1538	-24.5604	-20.0075	24.4192	197.921	518.783	892.965	1176.87	1417.56	1627.96	1788.23	2005.1
457.5	-40.0414	-33.8966	-24.0412	-19.9402	25.9809	198.13	516.062	893.331	1180	1418.26	1624.19	1793.81	2001.3
458	-40.0796	-35.54	-23.7513	-18.4059	25.2789	199.133	518.957	889.168	1181.84	1410.23	1625.09	1785.3	1999.02
458.5	-40.0414	-35.5796	-25.0539	-17.2242	26.9181	200.66	519.374	886.647	1177.56	1409.94	1625.86	1785.74	2005.35
459	-40.982	-35.5067	-24.519	-17.5544	28.765	203.151	517.826	881.58	1179.87	1416.73	1629.78	1788.55	2006.87
459.5	-40.3457	-34.4121	-24.1994	-16.6852	29.3357	202.167	513.409	884.398	1184.36	1422.62	1627.88	1787.44	2005.45
460	-38.9336	-35.9991	-24.6493	-17.6477	28.2217	200.087	513.899	888.55	1190.94	1426.23	1620.14	1790	1995.12
460.5	-39.2189	-34.3484	-25.1814	-17.5543	27.2408	197.11	515.495	885.62	1192.44	1423.96	1620.72	1789.64	1992.98
461	-38.412	-34.922	-24.922	-19.0006	27.3264	195.263	515.826	888.255	1196.72	1422.74	1624.34	1787.24	1993.18
461.5	-38.9592	-35.4517	-23.8629	-17.7309	27.8468	195.9	515.497	894.714	1194.66	1419.66	1623.16	1794.62	1989.92
462	-39.8424	-32.7118	-20.8223	-16.4424	28.5189	194.905	519.569	902.654	1193.42	1423.86	1618.86	1795.9	1988.62
462.5	-38.7209	-32.1049	-20.7459	-15.7221	27.6031	195.059	516.936	906.117	1192.19	1423.37	1615.76	1788.42	1988.39
463	-38.3473	-32.6329	-22.1859	-14.8748	27.0523	194.63	514.736	905.497	1187.74	1418.65	1613.1	1779.89	1998.7
463.5	-41.7973	-31.053	-23.0739	-15.0354	27.5676	191.71	517.203	908.855	1184.54	1415.18	1612.28	1782.25	2010.02
464	-41.8864	-31.5875	-23.6955	-14.1761	25.1126	195.956	515.455	913.129	1185.26	1412.94	1608.57	1790.28	2018.19
464.5	-40.3668	-33.4031	-24.6083	-14.3892	24.0025	197.447	510.984	907.142	1188.66	1424.18	1611.77	1785.14	2019.73
465	-37.9053	-32.3247	-25.144	-15.0277	22.584	199.588	514.697	899.655	1192.14	1423.7	1618.55	1786.62	2027.38
465.5	-39.1711	-31.1692	-24.8617	-15.528	22.8815	202.161	519.55	894.081	1197.78	1423.1	1624.78	1787.19	2025.15
466	-39.2888	-31.6174	-24.7385	-15.559	23.2116	204.141	521.488	892.08	1201.81	1427.92	1626.77	1786.14	2032.12
466.5	-40.1716	-33.8537	-24.1992	-17.6518	21.1297	204.522	515.607	893.584	1203.94	1426.1	1633.42	1789.97	2035.65
467	-39.7974	-32.7668	-23.8791	-17.942	21.4068	203.61	515.576	893.237	1204.26	1425.33	1640.8	1789.37	2038.21
467.5	-38.4614	-31.7301	-24.4846	-15.4083	21.0086	203.632	517.117	898.443	1208.5	1424.82	1647.46	1786.48	2036.16
468	-40.5294	-33.4297	-24.0104	-15.3191	22.8387	201.602	517.827	909.742	1216.01	1417.29	1642.1	1789.69	2038.36
468.5	-43.2713	-35.1643	-24.2319	-14.6334	23.1072	202.695	517.161	916.458	1214.78	1411.08	1643.98	1784.94	2046.47
469	-42.201	-32.9142	-23.8369	-14.5458	23.3163	205.634	516.989	915.398	1216.29	1411.3	1649.45	1784.94	2044.62
469.5	-41.2572	-33.4578	-23.0417	-15.9719	24.296	205.896	513.518	915.086	1211.37	1408.36	1647.59	1781.76	2039.07
470	-40.365	-34.1842	-25.0616	-15.0571	25.3857	206.773	508.727	908.984	1211.87	1410.54	1644.92	1786.06	2038.85
470.5	-39.8901	-34.277	-24.1423	-17.353	24.0648	203.853	507.809	908.584	1212.68	1406.93	1643.83	1795.53	2051.66
471	-41.1543	-34.9771	-23.1132	-17.9978	23.3844	203.378	506.926	909.399	1207.95	1410.21	1639.97	1795.2	2061.35
471.5	-43.4098	-36.4619	-23.8181	-17.0513	26.3841	203.32	502.697	906.14	1208.71	1411.61	1639.01	1788.69	2065.98
472	-42.3155	-35.7432	-24.0093	-21.1243	27.4016	204.436	505.415	905.245	1206.49	1417.19	1636.37	1779.1	2058.13
472.5	-41.8008	-35.7258	-24.1357	-21.2109	28.0688	203.267	510.471	906.809	1202.06	1417.96	1632.44	1777.44	2043.86
473	-41.9693	-32.9332	-23.1483	-20.8902	27.201	204.143	513.901	911.587	1202.71	1419.87	1634.35	1786.06	2036.49
473.5	-41.1248	-30.7376	-22.9805	-21.0368	28.0338	201.885	515.316	913.912	1208.36	1417.66	1640.02	1789.34	2040.57
474	-41.063	-30.7183	-21.6974	-20.2138	27.3785	202.392	514.737	908.919	1214.38	1412.17	1641.97	1788.15	2047.1
474.5	-41.4099	-31.5354	-22.3085	-18.3104	26.8926	202.796	516.506	905.407	1216.77	1420.86	1644.09	1794.38	2045.1
475	-40.0215	-30.9596	-21.988	-17.1655	25.8257	200.733	510.656	904.591	1217.38	1429.99	1646.24	1791.43	2046.2
475.5	-42.2852	-31.4453	-21.5608	-17.4704	26.2053	199.817	502.944	906.277	1215.54	1431.08	1647.31	1794.49	2046.88
476	-41.5861	-31.4465	-22.3945	-19.6207	25.9432	201.342	500.031	906.676	1211.62	1428.76	1650.78	1801.88	2047.85
476.5	-40.7237	-31.3436	-22.9384	-20.7627	26.4067	202.777	502.382	908.401	1207.81	1431.28	1654.37	1802.39	2054.2
477	-39.7759	-28.5642	-23.2841	-21.337	27.1371	205.356	508.743	905.057	1208.03	1431.99	1658.09	1798.53	2050.47
477.5	-39.6681	-29.2089	-22.8808	-20.4657	26.5863	205.127	511.948	904.009	1212.54	1428.66	1657.83	1799.02	2049.86
478	-39.4187	-29.4216	-24.8717	-18.9268	27.1139	206.181	510.807	904.43	1218.16	1427.27	1660.96	1798.73	2042.99
478.5	-40.1675	-31.7378	-24.1006	-18.4955	27.6441	208.499	513.746	903.157	1215.8	1423.59	1655.62	1804.88	2040.41
479	-40.3914	-32.6227	-24.7581	-17.714	28.1711	207.685	516.327	902.144	1214.42	1415.03	1651.88	1804.09	2047.99
479.5	-40.4646	-31.8742	-23.8003	-15.0614	28.3232	205.117	516.795	902.261	1212.47	1411.62	1644.29	1797.05	2041.04
480	-41.2846	-32.8266	-23.4835	-16.2435	29.1675	203.388	514.948	904.316	1209.94	1410.32	1640.23	1791.57	2026.81
480.5	-41.4064	-31.8348	-23.2089	-16.9032	30.5659	205.901	513.068	904.915	1206.6	1413.61	1636.93	1790.8	2022.13
481	-41.6115	-32.1431	-24.194	-19.1313	30.2221	206.917	513.728	907.653	1211.94	1418.45	1634.19	1792.99	2022.02
481.5	-40.4776	-32.2284	-23.9174	-18.5626	28.0772	207.699	515.665	912.346	1219.11	1418.02	1634	1796.89	2028.68
482	-39.5325	-31.6145	-22.6032	-17.613	27.4431	208.024	518.914	915.717	1220.14	1421.32	1634	1790.97	2035.19
482.5	-40.1189	-33.9363	-22.4069	-18.6984	27.3663	206.92	526.342	916.66	1219.69	1422.71	1632.06	1788.22	2035.23
483	-38.2787	-33.0368	-22.7893	-18.2569	28.9205	206.65	529.543	915.786	1212.6	1419.67	1627.2	1795.91	2028.73
483.5	-38.9848	-32.61	-23.9141	-18.2909	29.7498	207.444	532.232	916.14	1216.6	1414.74	1629.6	1799.45	2031.15
484	-39.1735	-30.8871	-22.9266	-20.0196	29.0496	206.757	530.91	917.653	1218.06	1415.8	1633.42	1797.93	2040.98
484.5	-37.0011	-30.0319	-21.4761	-18.629	28.1552	205.476	528.516	923.767	1215.41	1417.91	1636.68	1793.33	2038.74
485	-40.388	-31.681	-21.5613	-18.6032	28.4166	206.226	530.05	924.448	1210.09	1415.87	1634.66	1794.61	2041.78
485.5	-41.2563	-32.5594	-22.1046	-15.6135	28.8377	205.983	537.06	926.319	1210.23	1411.22	1637.1	1801.66	2048.78
486	-40.5886	-32.9431	-21.603	-16.511	29.2384	206.617	540.198	927.829	1216.84	1414.35	1639.71	1801.68	2049.48
486.5	-37.8415	-34.187	-21.3727	-18.7451	27.1896	209.204	534.027	918.017	1226.3	1422.45	1643.88	1801.24	2045.5
487	-38.1111	-33.972	-22.5668	-18.4345	27.2795	209.895	534.85	913.474	1240.11	1427.57	1651.59	1803.45	2033.17
487.5	-38.682	-32.4172	-22.8884	-17.6426	27.5668	208.395	539.294	911.174	1240.76	1427.01	1651.27	1809.41	2026.71
488	-39.3717	-32.4698	-23.2636	-15.8471	29.7771	207.14	541.511	903.173	1238.64	1427.82	1643.12	1814.41	2026.07
488.5	-39.7638	-32.1504	-22.8888	-14.6565	28.0695	207.501	542.352	900.842	1232.57	1422.09	1647.21	1818.31	2019.37
489	-39.1929	-32.4272	-23.486	-14.6544	30.0405	208.937	544.421	901.057	1224.31	1421.54	1655.33	1822.2	2016.63
489.5	-37.4675	-33.0779	-23.271	-16.6807	31.0507	208.789	546.049	902.439	1224.68	1420.16	1659.54	1806.16	2018.05
490	-37.4215	-33.7206	-22.5975	-18.492	30.6286	209.811	546.912	903.677	1226.01	1424.06	1660.82	1802.69	2015.59
490.5	-38.0669	-34.9364	-24.0045	-17.9113	31.3198	211.584	548.206	901.013	1229.7	1422.96	1664.87	1802.37	2005.39
491	-37.416	-33.44	-24.5018	-18.6017	30.4165	214.148	541.962	901.583	1221.35	1423.68	1668.74	1799.91	1997.78
491.5	-36.8711	-33.6127	-23.4104	-18.307	30.864	213.359	536.82	905.214	1213.46	1432.34	1680.38	1793.22	2006.53
492	-38.1389	-33.5393	-21.796	-19.2275	32.1339	214.531	538.47	908.015	1214.05	1439.38	1691	1789.06	2017.84
492.5	-37.3914	-34.9189	-22.4281	-17.5175	30.5828	216.606	539.752	908.971	1216.33	1437.49	1690.64	1794	2015.67
493	-37.3385	-33.7754	-22.2321	-18.708	30.4413	218.857	539.491	905.168	1217.14	1437.59	1689.68	1795.06	2018.76
493.5	-38.1493	-33.3935	-22.085	-19.6716	30.1832	218.877	540.5	906.074	1217.62	1440.49	1687.63	1796.07	2013.12
494	-37.2931	-32.9519	-23.0908	-19.0719	32.1433	218.562	540.133	905.952	1216.18	1442.7	1690.52	1798.99	2008.93
494.5	-37.6073	-33.2838	-23.8863	-18.147	28.8689	216.916	542.491	903.705	1216.41	1438.5	1691.96	1796.29	2010.76
495	-37.9476	-31.807	-24.6198	-17.8669	28.9173	216.517	544.665	898.525	1219.18	1435.83	1687.6	1798.01	2004.57
495.5	-39.9073	-30.8705	-24.3251	-16.4342	27.4357	215.389	552.402	903.092	1223.12	1432.26	1683.36	1799.51	2004.78
496	-39.7992	-33.9395	-22.164	-15.362	27.324	212.936	557.25	901.908	1230.11	1432.9	1679.64	1791.17	2001.84
496.5	-40.0245	-32.1254	-23.6263	-16.4718	27.354	209.411	551.197	902.602	1231.97	1437.85	1672.23	1783.91	1995.01
497	-40.0205	-29.3293	-26.2871	-16.7126	28.0343	205.88	546.201	907.679	1237.01	1443.46	1664.38	1785.87	1992.11
497.5	-40.6428	-30.8222	-24.3254	-18.3234	28.6093	207.963	544.167	906.779	1237.89	1438.78	1660.06	1775.18	1995.52
498	-39.1159	-29.9227	-22.4138	-17.9922	27.6317	210	549.057	901.83	1235.01	1435.47	1652.54	1768.64	1998.21
498.5	-39.6987	-32.1449	-22.2212	-18.6626	28.9541	212.328	551.318	901.054	1234.03	1431.99	1646.88	1762.46	1992.47
499	-40.0045	-34.479	-23.5429	-17.8233	29.1367	214.005	549.247	898.039	1233.74	1425.02	1647.29	1762.82	1990.74
499.5	-40.0182	-34.7858	-23.3708	-18.2715	29.1124	214.957	548.867	892.69	1232.82	1427.06	1660.01	1762.87	1998.2
500	-39.9902	-33.6485	-24.3938	-17.7655	30.6998	218.392	548.095	889.47	1222.81	1430.9	1666.26	1771.21	2007.76
500.5	-41.9149	-32.49	-25.8467	-17.7598	31.1461	217.842	549.339	893.151	1218.79	1440.67	1668.16	1771.88	2009.13
501	-39.1124	-32.7214	-24.6938	-14.8164	31.0055	215.492	549.984	897.879	1222.68	1444.32	1670.88	1768.31	1995.68
501.5	-39.035	-32.4218	-25.211	-16.3712	31.0918	214.677	546.428	901.725	1218.92	1439.4	1665.44	1766.38	1990.97
502	-39.0718	-33.1498	-24.8612	-18.1268	29.7089	214.393	544.493	901.202	1219.63	1439.74	1665.78	1767.32	1993.09
502.5	-38.7511	-33.4301	-22.8596	-16.1082	28.857	214.913	545.502	901.416	1219.7	1446.48	1674.81	1766.53	1993.39
503	-40.8607	-33.9177	-21.4858	-16.518	32.1625	217.844	546.983	900.451	1221.12	1439.38	1676.35	1772.08	1993.67
503.5	-41.7556	-33.948	-22.7484	-16.4762	32.7732	215.447	547.542	906.857	1222.53	1435.79	1676.99	1772.41	1995.96
504	-41.6072	-34.3026	-22.7727	-16.6218	30.6265	214.973	543.484	910.059	1227.47	1433.95	1674.29	1773.6	1995.62
504.5	-40.5619	-34.1544	-22.7978	-15.6599	31.6443	213.633	541.453	909.943	1230.82	1438.02	1679.09	1771.76	2005.35
505	-40.6156	-33.7267	-23.3285	-16.4262	32.0108	212.554	538.493	916.5	1232.64	1439.84	1685.96	1783.04	2000.83
505.5	-40.1941	-32.0164	-23.9295	-17.1063	31.1396	210.9	539.401	917.549	1224.57	1444.81	1691.43	1789.93	1997.01
506	-40.3162	-33.1122	-24.7974	-17.9762	31.2931	208.091	541.578	915.424	1213.61	1452.23	1694.85	1791.52	1998.66
506.5	-39.1959	-31.7949	-24.4281	-18.8269	32.5977	208.502	541.189	913.318	1206.12	1448.9	1697.68	1797.28	1998.53
507	-41.5842	-30.9366	-22.4552	-16.8128	31.2923	209.368	537.549	913.658	1197.3	1451.8	1697.58	1798.07	2002.67
507.5	-42.2623	-32.2755	-22.6353	-16.3305	33.5177	206.624	535.424	916.107	1200.1	1458.5	1702.87	1800.75	2005.3
508	-42.5906	-32.8802	-22.9422	-17.5597	33.2426	205.583	538.34	913.937	1204.53	1456.62	1706.96	1800.23	2004.93
508.5	-41.5714	-30.9018	-21.492	-17.2142	32.9077	203.242	539.629	908.632	1205.6	1455.34	1703.63	1806.21	1995.78
509	-41.2817	-31.7721	-22.6009	-16.5696	33.6676	205.819	543.269	908.644	1206.59	1457.11	1703.8	1809.65	1988.57
509.5	-40.7597	-30.2747	-21.6288	-19.3012	33.8931	203.878	543.968	903.547	1197.86	1460.3	1700.95	1807.87	1992.86
510	-40.2024	-29.6464	-22.6739	-19.8632	33.603	202.703	549.449	903.808	1194.8	1459.68	1698.94	1807.26	1989.4
510.5	-39.0515	-30.7147	-23.3938	-17.2002	33.6022	205.497	550.459	904.644	1197.52	1459.07	1702.14	1813.2	1989.09
511	-41.0851	-31.0814	-22.9485	-16.862	33.2486	208.199	553.439	904.411	1202.34	1456.12	1707.52	1817.22	1992.91
511.5	-41.5269	-31.5687	-22.5092	-18.6112	33.9087	207.674	555.865	898.793	1201.1	1457.55	1709.4	1820.56	1989.8
512	-42.1883	-30.5092	-24.4104	-17.4622	34.3112	207.796	558.302	893.651	1208.14	1458.67	1706.84	1817.66	1989.58
512.5	-41.6624	-31.305	-25.9401	-17.3786	35.0026	213.343	554.784	890.747	1217.27	1466.98	1705.17	1815.68	1989.87
513	-41.9208	-32.1016	-23.9855	-18.7246	36.4642	213.661	554.964	891.205	1220.8	1461.4	1708.34	1812.25	1983.78
513.5	-43.158	-32.6917	-24.2636	-20.0915	36.8777	211.925	551.482	899.155	1218.1	1458.61	1712.34	1815.85	1984.09
514	-40.5977	-33.5912	-25.8888	-17.6027	36.88	214.712	544.729	902.176	1211.58	1455.55	1709.92	1815.04	1985.2
514.5	-39.8382	-32.258	-25.1805	-18.1618	34.6508	216.383	542.922	897.079	1208.5	1455.62	1705.47	1813.28	1982.99
515	-42.0897	-30.8408	-24.6232	-16.6675	33.2478	214.553	538.152	898.245	1220.55	1455.67	1707.81	1820.72	1982.78
515.5	-41.3266	-29.9843	-26.0014	-17.2504	36.0432	213.773	538.086	903.205	1221.36	1453.78	1710.31	1828.99	1985.14
516	-41.1584	-30.4653	-26.6722	-18.5925	37.4808	214.976	541.885	899.069	1218.5	1452.76	1710.03	1833.54	1984.32
516.5	-40.3276	-29.6404	-27.6643	-18.601	35.0829	214.664	547.309	891.616	1222.3	1451.7	1708.92	1826.9	1984.29
517	-39.9553	-30.1593	-26.3664	-18.813	36.4959	213.827	550.148	894.899	1221.26	1455.52	1707.04	1823.76	1984.19
517.5	-41.1871	-32.4558	-24.9375	-19.3443	35.556	214.381	553.123	896.369	1219.71	1457.93	1703.3	1824.41	1991.21
518	-41.3134	-35.2546	-24.4304	-17.0759	36.7765	214.612	554.255	896.023	1217.45	1466.54	1700.82	1824.33	1998.64
518.5	-42.9533	-36.3321	-22.6176	-17.4024	37.7182	218.604	555.823	897.817	1216.61	1475.29	1707.51	1821.41	2004.79
519	-42.0091	-35.2224	-22.2964	-16.4816	38.4163	220.421	555.311	895.036	1214.54	1473.65	1709.8	1819.43	2017.41
519.5	-41.584	-34.9223	-22.22	-15.2186	35.6779	221.314	559.657	898.733	1219.82	1469.18	1713.24	1816.08	2025.67
520	-41.3349	-32.6698	-22.8993	-17.3334	34.2019	221.89	561.601	898.724	1224.77	1474.49	1716.9	1811.75	2016.13
520.5	-38.7832	-33.8113	-23.5737	-19.5153	35.1033	221.06	563.094	895.133	1222.37	1477.1	1721.22	1819.44	2005.97
521	-39.2604	-33.3266	-23.2216	-18.0717	35.1142	220.043	565.777	892.58	1216	1480.9	1714.99	1832.25	1998.88
521.5	-39.7718	-33.4802	-24.6381	-17.5762	35.2897	221.053	567.866	890.551	1218.31	1481.4	1713.82	1833.05	1999.99
522	-38.6347	-32.556	-24.6844	-17.1826	31.9553	220.581	566.423	886.778	1224.2	1487.01	1715.97	1824.41	2002.56
522.5	-39.0356	-35.2778	-23.3766	-16.6214	33.4388	222.11	560.499	887.849	1227.22	1489.58	1718.58	1820.46	1999.11
523	-39.3948	-36.0325	-22.6607	-16.3907	36.8761	221.62	554.44	887.095	1229.98	1487.77	1721.05	1818.18	2007.25
523.5	-39.9036	-36.3742	-22.8456	-17.063	38.411	220.668	555.388	883.242	1227.89	1488.16	1722.9	1816.31	2014.07
524	-38.7831	-34.6012	-23.1866	-18.0318	39.0541	221.031	560.334	885.779	1225.16	1489.79	1724.88	1812.36	2019.7
524.5	-38.1345	-34.1055	-25.1701	-19.9061	38.2469	224.38	561.84	886.539	1225.62	1483.39	1725.71	1808.75	2015.78
525	-37.992	-35.452	-24.8048	-19.4157	37.5733	224.667	562.32	891.846	1224.27	1476.25	1720.36	1803.11	2015.97
525.5	-38.5541	-34.307	-21.9617	-19.1599	38.4687	222.85	561.85	889.496	1223.81	1469.24	1721.26	1804.89	2020.97
526	-39.4779	-33.565	-19.0077	-17.8962	38.2419	222.523	566.713	893.783	1223.82	1467.72	1718.15	1808.5	2027.08
526.5	-40.4441	-34.8087	-21.709	-15.5169	38.7061	222.361	574.374	896.013	1220.74	1461.56	1722.15	1806.56	2024.28
527	-38.6444	-35.3529	-24.057	-16.8359	35.7211	221.668	573.895	896.48	1221.21	1450.24	1719.65	1809.61	2029.1
527.5	-35.752	-33.3574	-24.1112	-20.9986	35.4107	218.785	570.182	894.085	1228.37	1446.47	1720.65	1808.88	2034.46
528	-36.9592	-31.8799	-22.7017	-19.4253	36.2432	218.907	567.292	893.545	1224.67	1449.57	1730.43	1804.38	2042.26
528.5	-39.5305	-35.654	-20.9988	-20.9172	34.846	216.395	563.131	894.618	1223.02	1450.4	1731.2	1811.28	2046.22
529	-42.1494	-35.2824	-22.4148	-18.2036	34.9268	213.823	564.585	893.72	1226.13	1456.49	1723.43	1816.87	2043.36
529.5	-39.3744	-33.9889	-23.0821	-15.9974	34.4762	212.69	563.008	891.793	1228.53	1452.98	1711.57	1821.66	2045.68
530	-38.2669	-33.5235	-21.5539	-17.0168	33.8519	216.141	566.959	891.327	1223.61	1452.19	1709.08	1818.88	2050.47
530.5	-38.877	-34.0442	-23.2881	-17.0514	34.3552	217.147	570.149	888.537	1226.86	1458	1703.12	1814.98	2051.7
531	-38.6571	-34.216	-25.0841	-18.8231	33.9967	215.886	568.546	888.221	1231.23	1459.8	1703.89	1819.6	2042.77
531.5	-39.548	-32.7794	-24.5199	-18.2182	33.3622	213.023	569.198	886.941	1234.1	1462.92	1698.76	1821.24	2043.16
532	-39.8817	-29.9337	-23.2755	-17.5034	33.2493	212.279	573.243	882.27	1233.6	1458.73	1693.91	1811.04	2062.77
532.5	-39.2357	-30.0131	-23.867	-17.1221	32.932	214.469	571.817	881.507	1231.98	1457.64	1693.2	1804.31	2079.26
533	-39.2323	-31.1912	-23.5011	-15.659	32.32	215.152	573.804	885.113	1234.73	1463	1694.59	1795.91	2082.34
533.5	-38.556	-31.6504	-24.186	-14.6641	35.0563	216.502	577.063	891.78	1233.62	1465.43	1696.07	1784.06	2082.21
534	-37.2194	-30.7865	-24.3024	-16.3422	32.428	217.869	576.444	896.729	1234.34	1465.3	1692.31	1783.7	2085.03
534.5	-36.5347	-31.1214	-24.7502	-16.8745	31.7065	218.982	574.324	895.089	1238.05	1470.14	1688.87	1789.56	2084.1
535	-37.2489	-34.1365	-25.4182	-17.3434	32.8425	218.531	567.319	892.803	1243.08	1474.69	1679.26	1800.98	2077.46
535.5	-40.1738	-35.916	-23.2348	-15.9139	33.8508	217.564	566.178	889.852	1243.68	1473.54	1677.13	1805.41	2086.9
536	-39.9676	-35.3387	-24.7184	-17.0336	34.1238	218.454	568.401	893.132	1241.74	1472.49	1671.77	1814.31	2095.07
536.5	-40.4865	-32.3425	-25.6676	-17.3918	32.2323	222.071	567.516	903.338	1235.25	1473.62	1674.81	1818.46	2094.01
537	-40.4213	-31.8954	-26.3102	-16.8354	31.6369	223.46	567.78	910.379	1228.88	1474.06	1681.03	1819.82	2082.09
537.5	-39.9509	-32.6995	-25.1729	-17.9775	33.9042	222.818	566.017	911.92	1229.71	1470.89	1679.65	1825.43	2068.63
538	-40.5269	-34.9481	-22.6326	-17.8696	34.5993	222.172	562.786	912.81	1232.2	1467.12	1675.56	1828.04	2060.24
538.5	-40.9181	-35.0415	-20.3011	-17.636	33.3008	222.818	563.177	912.972	1236.18	1461.81	1682.93	1824.54	2058.58
539	-42.0106	-33.9359	-22.0978	-19.7707	33.7275	223.025	567.575	907.666	1234.48	1466.43	1680.18	1822.31	2057.23
539.5	-41.1083	-34.136	-21.7193	-20.308	32.4105	223.88	569.567	907.366	1241.63	1469.79	1682.19	1820.39	2056.28
540	-39.7337	-33.3773	-22.0928	-19.5022	29.9181	222.237	566.723	904.341	1244.02	1469.65	1688.84	1809.74	2061.95
540.5	-40.205	-34.2757	-23.0778	-20.003	29.5641	221.02	567.158	910.191	1243.52	1465.73	1692.93	1803.53	2060.71
541	-40.1772	-33.266	-24.8584	-18.4175	27.9506	221.645	568.041	908.573	1241.58	1454.07	1694.14	1805.79	2065.54
541.5	-40.9818	-33.1897	-22.9404	-18.3655	27.8557	223.146	565.675	909.063	1248.44	1446.59	1696.36	1810.39	2065.89
542	-40.3534	-34.252	-20.1452	-18.1229	28.491	224.805	563.986	916.843	1247.14	1444.35	1687.95	1816.25	2055.43
542.5	-39.5769	-33.3501	-20.8116	-16.1224	29.2512	224.628	561.069	914.094	1249.89	1445.52	1680.43	1819.81	2052.51
543	-40.0857	-33.2015	-21.0578	-17.5119	29.9543	224.798	560.418	907.894	1249.82	1443.43	1681.24	1822.75	2046.91
543.5	-40.0596	-31.5638	-22.5593	-17.445	31.5011	223.706	562.032	902.89	1239.98	1441.83	1679.43	1818.67	2053.56
544	-38.9253	-33.6633	-22.1677	-18.7405	29.4919	221.048	562.204	898.509	1234.97	1442.16	1678.17	1809.18	2054.96
544.5	-36.8021	-32.2249	-22.1375	-19.5364	30.6528	224.411	559.995	899.489	1234.77	1440.99	1676.91	1808.08	2058.44
545	-37.5425	-31.148	-22.0539	-17.1082	33.387	226.357	555.76	905.74	1235.17	1433.3	1670.69	1806.37	2064.36
545.5	-38.8964	-30.3919	-22.9005	-17.9179	34.1199	225.434	556.278	905.135	1227.34	1429.42	1675.9	1810.77	2064.11
546	-40.0981	-29.7778	-23.902	-17.0477	33.7958	223.009	561.005	909.785	1222.15	1429.07	1676.2	1805.59	2066.69
546.5	-40.5497	-27.4402	-21.1666	-16.8808	31.7046	223.792	562.198	916.356	1218.17	1428.25	1670.49	1797.35	2069.13
547	-41.1348	-27.5857	-21.7607	-15.9495	30.7081	225.058	563.971	918.041	1223.06	1432.27	1671.85	1797.38	2065.45
547.5	-39.8076	-28.3648	-23.5543	-14.4436	30.7187	222.46	563.438	911.011	1229.1	1436.14	1669.67	1803.79	2067.48
548	-40.7165	-28.4929	-22.6264	-16.7951	32.6259	221.866	564.628	910.937	1228.66	1438.07	1674.93	1805.17	2071.72
548.5	-41.0277	-28.9035	-20.7815	-17.4281	32.5876	222.116	562.331	909.009	1228.48	1441.89	1683.89	1802.53	2071.51
549	-41.8411	-31.1033	-21.6967	-17.847	31.8535	221.33	561.472	903.206	1225.2	1443.55	1680.75	1798.12	2075.01
549.5	-40.6204	-29.269	-22.9538	-15.7488	30.2002	220.59	560.645	896.641	1227.54	1441.82	1677.26	1803.63	2079.98
550	-40.763	-30.4185	-20.6342	-16.0283	30.5735	222.454	560.812	898.745	1230.52	1445.23	1681.87	1805.2	2075.16
550.5	-41.6692	-34.1158	-22.7839	-17.6309	30.4053	222.835	559.689	910.136	1226.1	1455.44	1678.76	1803.66	2063.76
551	-40.8856	-34.1753	-21.7364	-17.4739	30.2507	221.847	557.318	917.06	1226.18	1457.58	1672.89	1798.62	2065.83
551.5	-40.5961	-33.129	-20.9619	-17.5212	30.664	224.289	556.003	917.207	1225.89	1453.41	1671.15	1798.98	2070.03
552	-42.4945	-33.862	-22.174	-18.2151	30.5706	224.248	550.588	919.897	1222.26	1455.11	1672.03	1796.22	2067.05
552.5	-43.084	-32.4967	-21.8709	-17.9297	33.681	222.504	551.056	916.261	1225.07	1450.1	1668.74	1786.19	2063.31
553	-42.9455	-33.458	-20.8724	-16.6714	36.5366	219.266	551.378	907.887	1229.11	1449.32	1672.47	1789.6	2067.68
553.5	-41.7538	-34.1192	-21.6652	-18.2451	33.6397	223.017	555.883	908.286	1229.49	1452.2	1675.27	1792.03	2065.58
554	-41.0582	-34.7073	-21.9909	-17.8421	32.7926	225.229	558.096	906.759	1228.22	1453.84	1674.34	1794.24	2062.86
554.5	-42.2021	-33.5956	-23.8028	-18.3162	32.1581	222.48	553.293	911.479	1228.36	1457.72	1673.43	1804.53	2059.42
555	-42.2561	-32.3615	-23.2347	-19.309	31.9484	222.698	554.326	911.156	1234.91	1461.83	1670.13	1810.22	2065.8
555.5	-42.0791	-34.4993	-22.8186	-17.8232	32.6955	223.698	554.436	906.927	1232.83	1456.3	1669.15	1802.2	2073.37
556	-40.8091	-35.4275	-20.5349	-16.2871	33.9708	222.451	557.59	902.751	1226.52	1457.64	1660.14	1800.79	2073.85
556.5	-39.8503	-33.075	-21.2807	-17.0215	33.3159	222.885	556.009	904.414	1220.19	1459.09	1664.92	1801.88	2065.54
557	-42.9306	-34.7406	-21.6722	-17.3114	32.1164	224.366	555.326	906.045	1218.01	1460.09	1673.15	1800.82	2054.82
557.5	-41.5402	-35.2112	-20.0627	-17.9292	29.9247	224.718	559.58	907.556	1225.72	1472.27	1672.34	1802.43	2054.76
558	-40.2333	-34.1387	-21.0909	-19.2087	30.3845	228.991	556.582	906.303	1228.15	1471.91	1674.86	1811.85	2050.11
558.5	-39.5719	-34.2571	-21.5284	-18.5931	30.8546	229.551	555.411	901.418	1230.99	1464.91	1674.28	1817.74	2046.49
559	-40.5551	-35.4867	-23.0228	-18.4748	31.9104	224.899	559.629	901.753	1232.29	1460.86	1672.75	1821.29	2048
559.5	-41.6777	-33.7256	-20.7768	-16.4777	32.8673	222.414	559.248	901.021	1227.16	1454.03	1678.29	1832	2048.79
560	-39.2939	-33.1837	-20.5664	-17.5479	33.6232	222.407	558.992	893.69	1219.16	1448.4	1682.05	1831.55	2051.04
560.5	-38.3685	-31.6971	-20.6735	-20.0813	32.9163	223.801	560.935	894.75	1218.49	1445.1	1686.75	1832.97	2053.37
561	-38.4264	-31.9387	-20.8431	-18.8549	32.8009	224.938	560.129	900.436	1216.09	1442.61	1688.1	1834.04	2055.52
561.5	-40.7385	-33.209	-21.1526	-17.4214	33.4962	227.085	559.768	906.163	1217.05	1440.32	1686.24	1836.04	2054.9
562	-41.8443	-31.7994	-20.73	-19.0438	34.2377	225.612	562.999	907.945	1216.57	1437.26	1681.05	1840.93	2053.84
562.5	-41.9577	-32.3606	-20.891	-19.9918	36.4676	224.82	564.119	907.833	1210.94	1431.96	1680.84	1846.61	2054.11
563	-41.7099	-33.1737	-20.2415	-19.6484	35.0321	222.013	567.759	910.014	1216.14	1429.05	1676.53	1843.82	2054.07
563.5	-40.3577	-32.1163	-21.1294	-18.598	36.3522	223.055	568.994	909.816	1227.49	1426.34	1671.78	1836.32	2054.72
564	-40.7503	-30.7581	-22.3729	-18.7765	35.7618	223.998	568.791	907.179	1229.54	1427.43	1670.42	1838.27	2061.36
564.5	-39.7749	-33.2132	-23.072	-18.3978	36.0253	224.077	572.476	905.837	1221.52	1429.47	1672.56	1831.27	2059.7
565	-42.5109	-31.1762	-22.6721	-17.9063	36.6213	222.291	571.329	901.141	1220.34	1433.03	1674.57	1825.68	2058.02
565.5	-44.398	-32.584	-21.5665	-17.1072	35.7854	223.466	569.947	899.27	1219.94	1444.83	1678.5	1821.37	2056.61
566	-41.9484	-33.1244	-23.2579	-15.1913	36.708	225.631	573.933	902.716	1215.66	1455.29	1677.63	1823.14	2059.48
566.5	-41.7463	-34.5106	-22.9991	-14.9669	36.593	228.051	571.102	899.008	1214.41	1458.88	1676.61	1827.56	2058.96
567	-40.7855	-33.2432	-20.7805	-15.2421	36.9407	228.455	571.187	895.603	1215.33	1461.1	1679.3	1830.2	2057
567.5	-42.3128	-33.0264	-21.7287	-14.9286	39.42	229.992	575.383	894.37	1214.23	1462.82	1679.31	1825.72	2057.52
568	-41.5223	-31.3395	-21.8932	-15.6723	37.6392	232.114	578.477	896.989	1216.06	1463.02	1680.46	1816.43	2058.46
568.5	-41.8246	-33.3511	-22.1497	-16.2873	35.0667	235.445	576.869	895.95	1219.06	1463.61	1684.22	1809.19	2061.65
569	-43.1605	-33.3231	-23.4985	-15.3122	34.8187	236.151	573.948	891.938	1217.12	1465.61	1691.46	1799.77	2059.32
569.5	-44.0181	-33.8724	-21.7405	-16.4841	36.6605	235.06	568.473	890.727	1217.62	1458.01	1682	1800.58	2063.21
570	-45.8021	-33.7905	-20.1805	-16.1839	34.8486	235.011	567.518	895.941	1218.52	1460.56	1671.47	1807.92	2066.46
570.5	-43.7052	-33.3681	-21.3317	-14.5057	36.5742	234.129	568.728	892.86	1211.15	1462.68	1667.85	1808.04	2069.68
571	-42.2475	-35.3315	-21.951	-15.2697	35.7027	230.167	570.267	893.915	1218.66	1463.75	1666.45	1811.13	2066.19
571.5	-41.6281	-35.511	-21.4732	-16.1084	33.0044	233.82	568.582	898.334	1226.41	1463.05	1670.63	1807.38	2071.46
572	-41.5825	-35.092	-20.7047	-17.0675	35.7152	234.842	567.715	894.098	1230.4	1455.65	1674.75	1802.53	2069.39
572.5	-39.8752	-33.7898	-22.3102	-16.7268	36.5681	237.005	570.015	895.915	1228	1456.21	1684.88	1803.96	2071.01
573	-41.1137	-34.2724	-23.054	-17.6757	36.9087	238.759	573.186	895.111	1226.26	1455.69	1692.4	1808.12	2070.73
573.5	-41.3965	-33.861	-22.1291	-17.0918	38.0388	238.198	571.937	899.566	1226.44	1453.08	1691.6	1820.47	2071.72
574	-40.4569	-33.508	-21.8505	-17.0534	39.7561	235.252	569.761	902.774	1233.3	1451.41	1698.21	1828.52	2071.15
574.5	-40.0839	-33.6228	-23.0152	-17.3806	38.9397	233.408	568.973	907.044	1236.87	1444.77	1699.98	1824.65	2070.99
575	-40.2394	-33.9119	-22.4137	-17.3627	36.5493	234.627	570.692	905.847	1238.6	1445.07	1690.27	1816.96	2073.55
575.5	-41.3563	-32.9394	-20.2603	-16.2714	36.0372	233.706	573.201	907.137	1236.01	1445.62	1680.92	1822.33	2073.55
576	-41.8833	-32.3395	-21.6151	-16.9174	35.3587	233.73	574.762	916.505	1232.81	1452.34	1680.2	1824.71	2064.85
576.5	-40.1905	-32.7665	-22.2514	-17.5878	35.4178	232.906	576.393	922.014	1238.22	1457.84	1688.98	1827.38	2067.93
577	-41.3875	-32.6738	-22.3685	-18.5153	37.5666	234.815	575.86	924.738	1242.26	1465.54	1682.46	1836.9	2071.23
577.5	-42.7268	-32.6704	-20.1898	-15.9348	37.6992	234.397	573.555	929.437	1240.04	1465.71	1678.01	1832.32	2073.5
578	-41.962	-33.5244	-21.978	-14.3505	36.7991	232.889	577.49	925.089	1236.79	1461.09	1679.49	1835.35	2064.48
578.5	-41.0594	-31.6534	-23.3978	-14.4474	36.026	231.828	577.329	925.698	1241.17	1461.09	1672.66	1836.86	2054.67
579	-42.0347	-31.1103	-22.5668	-16.4822	34.9105	233.895	578.403	925.724	1246.57	1461.1	1668.39	1835.18	2058.09
579.5	-44.2818	-31.2117	-24.3224	-16.3439	34.5981	234.954	583.983	932.723	1243.97	1457.87	1673.46	1827.75	2059.08
580	-42.7855	-32.3821	-23.3158	-17.0947	37.3971	231.227	586.896	939.547	1238.14	1456.46	1675.46	1818.9	2066.46
580.5	-40.6872	-33.2662	-24.5168	-15.9581	37.5284	230.991	581.417	939.961	1238.19	1459.91	1675.03	1817.65	2069.23
581	-41.7099	-33.7466	-25.0616	-13.7786	36.2454	232.347	582.079	941.627	1240.92	1461.22	1675.09	1811.26	2070.26
581.5	-40.2728	-33.8311	-25.0346	-13.8726	35.6539	231.973	588.445	941.391	1236.45	1461.89	1681.04	1803.18	2074.16
582	-40.8647	-34.808	-24.8713	-13.8936	35.3287	233.119	592.653	945.077	1233.38	1465.83	1687.88	1808.34	2076.94
582.5	-39.7281	-35.2558	-24.0062	-14.7305	35.6153	235.931	594.433	944.572	1234.31	1470.64	1688.25	1814.62	2073.15
583	-40.4654	-33.1527	-23.6346	-15.5726	35.9956	236.687	591.389	945.135	1237.51	1473.48	1687.18	1820.42	2070.93
583.5	-39.4011	-33.8552	-24.2021	-16.8112	36.3816	238.203	588.814	942.075	1235.57	1475.3	1689.31	1830.59	2070.11
584	-40.4246	-36.3296	-24.0677	-15.7099	34.832	240.353	590.354	938.639	1234.78	1472.71	1691.33	1841.27	2066.62
584.5	-41.0131	-34.5163	-24.3882	-15.7392	33.3484	242.752	592.454	934.037	1236.17	1467.14	1685.88	1835.85	2066.58
585	-42.7454	-35.6812	-23.4776	-15.9098	34.2678	242.168	591.232	927.554	1236.89	1467.51	1683.69	1834.54	2073.01
585.5	-41.4922	-36.7291	-23.3624	-18.0811	35.0929	240.478	587.421	928.403	1235.83	1466.41	1687.04	1841.93	2076.34
586	-40.315	-37.0343	-22.2688	-17.3269	33.8534	240.118	588.546	938.683	1242.55	1472.98	1689.44	1839.83	2072.87
586.5	-41.4093	-36.4897	-23.7839	-15.8676	34.5912	239.177	591.103	949.744	1245.62	1483.37	1694.56	1838.67	2070.69
587	-42.8994	-35.0029	-23.8683	-15.7655	36.6185	237.918	590.518	952.815	1248.84	1490.78	1703.54	1840.24	2076.85
587.5	-40.5536	-33.0765	-24.1327	-14.5471	36.344	235.804	587.173	951.632	1251.32	1491.68	1702.32	1830.64	2080.07
588	-39.2154	-34.465	-22.9853	-16.8518	36.5456	236.224	586.909	953.099	1252.31	1493.19	1703.51	1829.46	2078.59
588.5	-41.0389	-34.3221	-22.7218	-17.1772	35.2708	236.043	591.396	952.106	1247.89	1488.52	1698.16	1830.26	2068.42
589	-41.6545	-33.4582	-23.0732	-17.4151	34.8032	235.138	594.71	951.736	1237.34	1490.12	1694.3	1825.68	2071.34
589.5	-40.8659	-31.1146	-22.6665	-17.6259	34.8528	234.75	594.197	948.286	1235.9	1484.28	1695.67	1821.1	2073.99
590	-39.5803	-33.8712	-24.0227	-18.0603	34.7167	236.155	594.914	948.858	1235.54	1484.47	1703.8	1825.23	2079.46
590.5	-40.542	-33.5751	-23.5164	-18.0703	35.3829	235.056	596.759	954.251	1232.75	1485.39	1703.7	1825.72	2089.02
591	-38.6364	-32.0033	-21.6112	-18.6845	38.3939	232.733	595.978	952.864	1235.43	1486.83	1704.59	1830.92	2093.92
591.5	-40.6979	-32.9288	-22.0775	-17.2961	38.3676	235.74	596.961	950.967	1231.6	1490.06	1708.71	1842.45	2097.91
592	-41.6495	-31.9376	-24.5609	-18.0299	38.217	243.33	595.346	954.195	1239.04	1500.84	1710.47	1844.46	2099.32
592.5	-41.1161	-33.5367	-24.5101	-19.2927	37.1831	243.757	591.179	957.993	1238.8	1512.32	1702.99	1837.42	2091.98
593	-41.0637	-34.231	-22.8874	-17.9305	36.5306	243.885	589.614	961.712	1244.66	1517.17	1702.42	1830.36	2087.84
593.5	-40.9389	-38.7413	-23.1056	-16.3454	35.8218	243.189	596.509	954.647	1254.59	1517.46	1706.23	1832.35	2095.3
594	-40.2633	-37.3962	-22.3845	-18.5364	33.3958	239.875	597.696	951.359	1254.14	1515.39	1708.63	1841.01	2096.29
594.5	-40.1066	-35.1525	-24.2252	-17.47	33.7888	236.926	594.644	946.856	1254.4	1519.87	1711.05	1845.2	2092.67
595	-38.5284	-35.2117	-23.4582	-17.5978	34.9516	236.376	598.636	948.93	1253.5	1524.27	1713.23	1845.18	2089.55
595.5	-37.5095	-35.7068	-21.0194	-17.6049	35.3481	235.385	598.321	946.472	1253.63	1524.6	1713.45	1847.64	2092.48
596	-37.6034	-32.9133	-20.0654	-17.5217	37.1444	236.168	598.047	943.487	1248.37	1514.73	1708.62	1852.19	2090.07
596.5	-39.2048	-35.3925	-21.9442	-17.1802	35.6863	236.033	600.343	945.068	1249.62	1506.93	1708.1	1862.06	2082.24
597	-39.6459	-34.8009	-22.1015	-15.5764	34.0721	235.195	600.152	939.824	1255.99	1503.05	1709.92	1865.29	2083.93
597.5	-38.5828	-33.7284	-23.6404	-16.3744	35.9083	236.958	598.475	942.233	1263.75	1505.76	1712.01	1860.55	2082.52
598	-36.9456	-31.2332	-22.4085	-16.2349	36.2076	240.242	601.42	951.036	1267.97	1514.26	1713.34	1851.81	2087.25
598.5	-38.6901	-30.6122	-22.9772	-15.8944	33.4475	241.208	607.339	952.351	1269.71	1513.55	1713.37	1845.77	2087.08
599	-39.3049	-30.6344	-22.0957	-17.1952	33.0349	239.998	609.373	954.842	1268.63	1518.31	1719.77	1843.51	2081.36
599.5	-39.3437	-30.5344	-22.326	-15.706	34.0172	239.254	608.256	956.525	1270.73	1517.78	1721.54	1851.45	2077.31
600	-40.2285	-32.3308	-23.2191	-14.099	34.4053	240.381	605.429	957.374	1271.71	1509.56	1718.35	1863.46	2078.78
600.5	-38.5115	-32.0885	-23.509	-14.1507	36.1131	240.792	600.891	963.104	1270.68	1504.49	1716.62	1868.26	2073.76
601	-38.1623	-33.3134	-24.261	-14.605	36.2172	238.604	600.395	965.968	1273.76	1492.56	1710.1	1863.41	2062.53
601.5	-39.5704	-34.1798	-23.3511	-15.5616	38.1192	242.79	599.131	968.48	1271.16	1478.82	1711.2	1858.71	2052.43
602	-39.9854	-33.2815	-23.5393	-15.7295	37.8288	244.799	600.665	967.834	1270.89	1482.37	1714.57	1862.03	2068.01
602.5	-41.0869	-33.6526	-25.1749	-16.714	40.3069	243.422	603.289	962.336	1268.74	1487.11	1717.95	1863.47	2081.62
603	-42.1865	-33.5711	-23.8699	-16.1267	42.2379	245.025	600.469	961.24	1265.15	1487.63	1721.94	1857.38	2082.58
603.5	-41.4251	-33.9615	-23.4677	-15.5729	41.6658	245.506	601.956	958.519	1268.06	1480.51	1722.4	1851.02	2080.04
604	-40.7195	-36.2563	-22.6832	-15.9278	39.9627	243.544	603.684	956.372	1265.8	1473.26	1719.23	1855.84	2075.21
604.5	-43.4217	-33.962	-22.192	-17.8817	38.3259	244.509	604.379	956.422	1268.77	1470.77	1722.26	1863.81	2072.77
605	-41.4813	-33.8624	-21.3959	-19.3264	37.8202	243.38	604.781	952.194	1274.54	1472.59	1723.79	1873.65	2076.51
605.5	-42.9136	-34.225	-22.0017	-19.449	37.5332	242.37	611.474	955.678	1280.41	1477.51	1720.9	1878.92	2078.28
606	-42.6895	-33.7486	-20.848	-19.5758	37.3898	243.886	611.929	956.409	1286.63	1480.39	1721.72	1882.09	2075.71
606.5	-40.7329	-34.8335	-21.4167	-18.4228	37.0553	243.798	611.666	951.642	1283.15	1479.87	1721.94	1889.14	2075.95
607	-41.7271	-34.6161	-21.743	-18.0998	35.2352	245.07	612.116	952.782	1277.6	1475.66	1729.16	1883.87	2077.45
607.5	-40.6909	-34.1639	-20.7202	-18.664	34.6076	245.558	612.785	954.889	1281.09	1476.25	1736.08	1881.04	2073.89
608	-39.1772	-32.3359	-21.8367	-16.7268	37.5371	241.948	612.88	954.353	1282.97	1481.32	1737	1873.5	2071.56
608.5	-40.6761	-31.3433	-21.8172	-17.0915	36.8053	242.981	611.025	951.422	1283.07	1481.57	1738.26	1869.05	2071.22
609	-40.9176	-33.0982	-22.4464	-16.3181	37.7391	241.043	606.566	959.291	1279.92	1480.98	1733.9	1865.16	2080.91
609.5	-42.7493	-35.468	-20.0353	-13.7017	37.408	244.003	607.925	967.325	1278.81	1481.21	1733.87	1864.06	2079.69
610	-42.6788	-35.1008	-18.6428	-15.164	40.2874	242.46	612.315	963.802	1275.63	1484.93	1734.66	1873.07	2073.13
610.5	-43.3823	-32.9485	-18.3522	-16.2285	40.4486	241.22	608.595	962.659	1276.17	1488.77	1733.42	1863.61	2064.95
611	-42.1622	-31.95	-20.3658	-15.5102	41.0026	237.877	605.647	961.904	1271.59	1491.78	1735.56	1857.85	2069.66
611.5	-37.2677	-31.1699	-22.1169	-15.4061	42.1571	239.749	608.322	963.621	1271.02	1489.57	1744.12	1860.89	2079.55
612	-37.9558	-30.3725	-22.2628	-15.9097	42.6648	239.964	607.07	962.891	1266.91	1489.83	1749.21	1865.3	2081.87
612.5	-37.4352	-30.2672	-21.3715	-15.1493	43.2245	240.647	604.95	961.69	1264.05	1492.13	1742.88	1863.69	2080.42
613	-37.3249	-31.2382	-21.9164	-14.5893	42.9891	242.769	602.51	962.914	1265.77	1491.39	1731.32	1871.65	2075.87
613.5	-37.3281	-33.5411	-23.2936	-13.4331	43.2934	242.94	602.606	967.247	1271.99	1490.41	1731.08	1874.61	2075.99
614	-38.1159	-32.6661	-21.284	-15.2934	41.9573	242.646	605.908	965.984	1273.29	1494.64	1729.56	1864.41	2074.44
614.5	-37.8557	-29.3157	-20.9799	-15.4557	41.51	244.739	612.337	965.559	1276.62	1495.46	1740.21	1854.34	2076.46
615	-37.0255	-29.6882	-23.0248	-15.3919	40.3356	247.86	610.831	975.687	1279.05	1491.33	1745.47	1852.95	2072.23
615.5	-37.4797	-30.6833	-21.8662	-13.6524	39.8631	245.493	614.268	979.895	1273.61	1488.13	1740.68	1856.87	2070.62
616	-37.6909	-29.9557	-20.3226	-13.7272	40.8526	243.87	617.675	979.118	1271.61	1489.69	1737.7	1848.86	2071.37
616.5	-37.1441	-30.0566	-20.609	-12.9587	39.3359	241.98	614.024	978.572	1269.28	1492.95	1739.25	1848.63	2071.29
617	-40.1103	-31.1646	-21.1055	-13.8368	38.6653	243.168	614.26	978.275	1262.08	1493.72	1736.15	1857.67	2072.63
617.5	-41.9471	-30.4944	-21.2397	-13.4688	39.3735	247.951	615.961	976.236	1259.79	1492.67	1729.08	1867.1	2073.06
618	-40.0429	-30.2214	-23.152	-14.0989	37.8045	250.687	617.809	971.571	1257.03	1491.29	1723.36	1865.03	2068.73
618.5	-39.3356	-31.8508	-21.7521	-15.0857	37.2431	251.448	620.819	965.243	1256.74	1490	1724.75	1853.43	2067.9
619	-39.1933	-31.0541	-21.1256	-14.1837	35.7821	249.06	623.621	964.637	1255.05	1486.35	1722.2	1850.87	2066.63
619.5	-39.3693	-31.0694	-21.5772	-13.8712	37.3815	246.881	620.997	965.031	1252.91	1488.11	1722.57	1850.57	2057.85
620	-40.0202	-31.1787	-22.3018	-14.2703	38.6659	244.112	616.77	966.175	1256.71	1482.88	1723.28	1853.71	2063.45
620.5	-41.6374	-31.6983	-20.9395	-14.2646	39.8934	240.251	615.768	962.425	1258.99	1480.08	1721.11	1856.67	2070.98
621	-42.2506	-32.0555	-20.8	-13.6443	39.2444	241.52	613.1	958.673	1253.99	1474.81	1719.58	1861.46	2071.24
621.5	-42.4809	-31.398	-22.0854	-15.2938	39.3095	246.588	613.198	959.542	1252.3	1474.21	1724.73	1864.47	2067.02
622	-41.0409	-33.3062	-20.2407	-15.8529	39.8127	250.171	616.309	956.729	1252.71	1476.73	1730.85	1868.77	2070.25
622.5	-40.6787	-31.6684	-21.8368	-16.9001	37.8668	251.416	614.324	954.466	1256.92	1480.95	1729.1	1864.4	2067.48
623	-40.4481	-31.3917	-19.7473	-17.162	36.2514	254.462	615.785	953.999	1259.05	1484.18	1722.22	1858.43	2061.04
623.5	-41.1904	-31.319	-21.0626	-16.7939	36.8877	254.833	615.759	954.96	1259.54	1492.15	1728.18	1854.02	2061.2
624	-42.1175	-32.6074	-20.3216	-16.9076	36.7292	255.873	613.225	951.1	1265.23	1492.62	1728.87	1851.74	2059.54
624.5	-41.5197	-33.2453	-18.4142	-16.5347	36.155	257.672	611.96	946.289	1266.7	1494.43	1724.93	1858.1	2062.18
625	-40.2863	-32.8191	-19.6149	-17.3777	35.948	256.211	615.848	942.272	1261.68	1492.58	1724.6	1862.82	2072.58
625.5	-40.0654	-32.4155	-20.7704	-18.5351	35.6036	254.458	621.247	940.233	1258.63	1490.34	1721.64	1867.46	2075.21
626	-40.9211	-33.7681	-21.3515	-18.1671	34.3819	255.108	625.769	943.741	1251.67	1491.54	1718.96	1868.67	2079.26
626.5	-42.4936	-34.1335	-20.8421	-19.9913	33.9378	254.891	627.38	948.002	1252.79	1500.58	1709.25	1863.47	2076.92
627	-42.8062	-34.0494	-19.7863	-19.6399	33.5784	252.331	630.019	945.317	1256.33	1504.1	1707.25	1854.93	2085.12
627.5	-43.6233	-33.6047	-20.35	-17.8151	33.8113	255.936	629.522	945.992	1259.41	1499.3	1707.4	1854.42	2085.84
628	-41.5633	-32.9499	-19.2124	-15.7846	34.4136	256.757	627.952	946.646	1264.18	1498.56	1705.88	1851.69	2076.28
628.5	-39.3573	-33.0222	-20.576	-15.1535	35.1675	256.029	629.617	949.031	1262.88	1501.62	1697.85	1845.06	2077.39
629	-38.4188	-33.1381	-18.6291	-15.0626	36.743	256.074	626.588	950.885	1263.96	1502.53	1702.51	1844.25	2080.84
629.5	-40.1232	-33.1466	-17.5286	-15.1622	36.1097	260.821	623.752	951.381	1262.75	1505.2	1705.3	1843.53	2080.43
630	-41.3086	-34.0878	-20.0995	-15.2871	36.7353	262.983	622.777	951.201	1258.57	1499.41	1699.26	1842.88	2077.38
630.5	-42.5414	-34.1249	-21.2794	-13.9575	37.1843	265.667	626.452	951.453	1251.59	1495.78	1705.82	1849.1	2079.97
631	-42.4752	-32.4964	-22.1353	-14.8162	39.2515	266.491	630.301	953.841	1250.38	1493.6	1712.01	1853.11	2082.6
631.5	-41.6729	-32.4904	-22.1462	-15.7217	39.9095	266.867	625.285	957.139	1249.14	1491.02	1714.01	1843.2	2075.96
632	-39.8805	-32.0521	-22.5019	-17.0384	40.072	266.901	621.937	959.49	1242.77	1490.87	1716.88	1836.7	2082.96
632.5	-38.9898	-31.4343	-21.7855	-16.7452	38.0573	269.385	623.231	963.847	1241.91	1493.9	1718.33	1829.37	2081.9
633	-40.2837	-30.5918	-22.3662	-17.58	38.1168	269.078	623.955	965.662	1237.82	1497.82	1710.33	1833.46	2079.45
633.5	-40.8595	-31.077	-21.9557	-15.7058	40.2625	269.016	624.718	965.851	1250.17	1498.99	1711.3	1835.48	2079.84
634	-42.5464	-31.0579	-20.8908	-14.2243	41.4466	271.614	624.076	960.553	1256.51	1501.02	1713.52	1832.03	2082.33
634.5	-42.3521	-31.4712	-22.4135	-15.2272	42.5525	270.725	625.496	954.144	1253.79	1491.65	1718.02	1832.32	2077.64
635	-40.2588	-30.1534	-21.587	-16.0124	42.0523	266.74	627.032	957.256	1252.78	1485.58	1715.62	1829.69	2077.51
635.5	-42.0209	-28.7153	-20.7045	-16.7605	42.6346	266.763	624.414	960.176	1261.22	1476.84	1722.57	1826.99	2073.8
636	-43.7035	-31.1588	-20.9208	-15.5518	40.8897	271.891	620.951	955.897	1259.37	1474.29	1730.68	1832.6	2069.64
636.5	-43.7764	-31.5001	-19.6787	-16.5019	38.8003	272.841	614.318	954.929	1255.74	1476.47	1730.02	1842.88	2068.79
637	-40.5929	-32.7227	-20.1852	-16.3818	39.6221	270.303	612.501	960.153	1255.06	1480.66	1733.08	1847.63	2069.46
637.5	-39.6538	-31.5965	-22.4938	-16.6983	38.7752	270.049	613.702	958.127	1258.25	1478.95	1731.06	1853.86	2060.87
638	-40.2381	-32.0725	-23.3859	-16.1765	38.1861	269.67	619.553	956.44	1265.02	1477	1727.91	1847.81	2058.44
638.5	-41.0521	-32.0116	-21.6715	-15.1448	39.1502	271.299	621.48	957.624	1257.32	1484.77	1733.15	1840.82	2062.17
639	-38.0919	-32.1193	-22.4425	-15.7503	41.398	270.357	623.565	957.167	1256.57	1488.79	1738.39	1838.83	2059.57
639.5	-38.3474	-30.4236	-22.3489	-15.3432	41.2321	268.753	624.509	951.828	1262.49	1479.71	1734.85	1845.71	2059.28
640	-41.312	-31.7222	-21.0792	-15.586	43.302	268.467	626.186	946.03	1263.8	1481.74	1737.29	1856.82	2058.25
640.5	-42.1691	-30.9545	-20.6808	-15.6569	42.7501	271.895	626.187	948.601	1264.82	1484.21	1736.46	1867.83	2052.74
641	-39.8986	-31.1923	-20.8293	-16.0858	40.9144	271.611	624.704	953.321	1267.9	1481.08	1735.62	1875.55	2061.85
641.5	-39.5355	-30.6013	-20.1769	-16.0778	38.4687	272.408	622.64	960.535	1268.69	1476.13	1729.66	1883.64	2064.16
642	-40.3333	-29.0467	-21.2828	-15.221	37.646	271.311	617.723	961.64	1264.11	1476.55	1729.55	1885.09	2068.23
642.5	-40.2449	-29.5015	-19.4521	-14.201	39.8434	273.374	619.068	959.52	1261.18	1484.57	1737.16	1880.5	2072.23
643	-40.4051	-32.5541	-18.899	-15.2037	40.2468	273.281	623.824	962.405	1263.31	1485.51	1743.07	1882.05	2069.11
643.5	-41.1182	-32.2857	-18.933	-17.3167	39.7568	274.316	626.406	970.611	1262.95	1485.06	1741.16	1877.84	2062.4
644	-41.1446	-31.4687	-19.5659	-18.5244	40.7235	274.567	626.628	975.428	1263.34	1484.19	1736.21	1873.19	2052.25
644.5	-41.323	-32.8123	-20.93	-18.8045	43.3075	272.89	628.711	973.08	1261.3	1481.96	1733.01	1875.93	2063.25
645	-40.4951	-32.2545	-22.1706	-17.7702	44.9815	268.027	633.778	969.413	1263.63	1470.59	1737.28	1878.61	2076.15
645.5	-39.3214	-31.3316	-20.6123	-18.0824	44.1675	267.634	631.522	970.597	1265.61	1461.75	1737.8	1890.87	2076.97
646	-37.5645	-30.5768	-19.8072	-17.2477	43.2249	268.378	628.092	980.131	1264.8	1458.58	1742.38	1899.08	2082.68
646.5	-37.0123	-32.2308	-20.4829	-17.9145	43.0253	266.17	631.46	982.55	1265.53	1448.14	1741.78	1898.92	2084.44
647	-39.3409	-31.4747	-22.5624	-17.3563	45.4097	269.262	632.345	981.543	1264.14	1440.51	1737.5	1901.19	2082.16
647.5	-37.9143	-32.8215	-22.0544	-16.4853	45.0135	268.637	631.673	986.48	1264.04	1449.81	1726.71	1903.3	2079.15
648	-38.2057	-32.1754	-20.9402	-14.4006	43.7215	267.087	631.424	986.775	1273.52	1454.24	1723.5	1903.36	2087.05
648.5	-40.3359	-33.2769	-21.8378	-15.4091	41.9433	267.471	630.772	988.153	1280.26	1452.7	1722.7	1904.31	2090.12
649	-38.5465	-35.0896	-22.9006	-16.2808	41.1083	269.766	627.047	987.333	1270.3	1459.98	1727.36	1903.81	2087.83
649.5	-38.477	-33.3627	-22.7344	-15.8658	39.1356	269.704	627.877	989.982	1258.86	1467.26	1733.5	1899.88	2084.46
650	-38.7575	-34.9316	-22.5003	-15.3836	39.7834	266.696	630.614	987.243	1252.34	1467.62	1730.53	1901.47	2086.38
650.5	-37.4947	-34.3395	-22.5953	-15.1597	41.8892	264.891	629.546	985.753	1255.48	1475.95	1728.35	1888.05	2083.87
651	-38.5857	-33.2634	-21.1596	-14.8296	39.2567	263.827	629.185	985.635	1257.24	1474.88	1720.8	1876.63	2077.98
651.5	-37.5491	-32.7118	-21.1701	-15.1579	38.4505	264.001	630.636	985.716	1257.02	1478.98	1717.95	1883.91	2083.26
652	-39.9374	-32.2173	-21.4772	-14.4148	37.7246	266.158	630.26	979.172	1259.42	1481.14	1721.93	1892.34	2083.2
652.5	-40.5337	-30.4736	-21.9958	-15.4821	37.5902	266.112	628.922	971.393	1259.99	1474.69	1723.89	1889.48	2085.06
653	-41.3206	-31.7822	-22.0323	-15.6994	39.0025	266.212	626.917	970.771	1258.02	1468.74	1718.8	1891.46	2082.28
653.5	-41.505	-32.2569	-21.2341	-12.9066	36.7726	264.742	623.113	968.773	1262.34	1466.03	1716.94	1891.91	2079.1
654	-39.4302	-32.2826	-21.3194	-13.0621	39.3318	264.467	624.23	965.527	1263.37	1471.66	1710.72	1886.69	2075.03
654.5	-38.9838	-30.8823	-20.8615	-14.4342	41.5691	263.492	624.207	961.538	1260.12	1472.27	1710.28	1882.79	2063.48
655	-40.5891	-31.1657	-19.8379	-14.6933	43.3795	263.652	621.842	964.405	1254.16	1471.07	1721.26	1886.26	2062.6
655.5	-40.6499	-32.812	-19.2673	-14.458	43.1246	261.789	625.564	964.215	1248.06	1471.67	1732.51	1886.77	2065.58
656	-41.8595	-31.2777	-21.1494	-14.8687	42.66	261.457	627.468	963.481	1242	1466.72	1736.45	1877.52	2065.41
656.5	-42.2173	-33.1163	-19.9195	-14.9904	41.4684	260.508	630.81	961.172	1239.98	1467.77	1732.68	1877.87	2056.31
657	-40.0566	-32.5589	-20.7633	-14.5634	41.5946	259.966	634.013	960.884	1240.96	1470.33	1731.05	1880.51	2048.59
657.5	-40.9084	-31.8988	-22.4713	-15.6274	39.6921	259.579	632.687	963.387	1238.16	1469.89	1731.17	1875.97	2051.51
658	-39.5909	-32.0436	-21.7699	-15.7244	40.3652	259.623	633.784	966.5	1237.56	1474.62	1730.63	1879.84	2058.9
658.5	-39.8787	-32.9844	-21.7987	-14.0173	42.322	260.126	632.78	962.216	1237.95	1472.81	1725.07	1875.77	2057.96
659	-41.8454	-31.8615	-22.4278	-15.0329	40.2071	260.741	633.609	957.142	1240.16	1470.12	1721.73	1870.04	2058.08
659.5	-40.8822	-31.7442	-21.2696	-13.4263	39.6264	256.27	635.606	956.621	1241.42	1471.69	1727.66	1871.73	2058.5
660	-40.8513	-31.9465	-20.6138	-13.5591	39.0362	253.074	636.505	960.995	1242.11	1479.03	1722.9	1883.31	2063.86
660.5	-39.8493	-32.3612	-21.1301	-15.1003	39.2022	253.405	632.238	958.834	1254.31	1477.69	1716.43	1884.09	2059.03
661	-38.4482	-33.9189	-20.522	-15.5449	39.2687	252.143	630.498	960.314	1267.22	1478.74	1719.12	1880.02	2051.09
661.5	-39.693	-33.318	-21.1314	-14.9004	39.5244	252.938	636.138	965.891	1266.23	1476.78	1722.63	1879.18	2041.11
662	-38.6235	-31.8324	-21.9899	-13.7056	42.5268	251.193	642.496	963.574	1265.57	1478.34	1730.63	1873.91	2044.61
662.5	-38.4262	-32.248	-21.8034	-14.8169	44.0461	252.082	644.458	956.154	1259.97	1479.3	1736.26	1872.45	2056.41
663	-40.3793	-31.5698	-21.9334	-15.9427	44.0871	254.207	640.541	951.257	1256.1	1478.05	1734.02	1878.88	2060.81
663.5	-40.7155	-30.056	-23.2941	-16.6905	44.0503	255.011	642.771	950.486	1254.42	1470.61	1739.18	1876.97	2053.18
664	-38.5418	-29.4547	-23.577	-17.3068	45.1963	255.788	646.842	954.56	1253.02	1466.58	1743.87	1869.52	2054.07
664.5	-37.2376	-29.2009	-22.4052	-17.38	43.7614	256.726	644.306	956.825	1247.71	1468.44	1741.71	1861.18	2052.91
665	-35.5091	-29.4061	-22.0746	-13.6915	41.7907	256.036	642.97	955.738	1244.15	1472.53	1742.2	1868.56	2042.93
665.5	-36.403	-31.0482	-23.6084	-13.8039	40.6169	254.135	642.5	958.476	1242.5	1468.73	1748.67	1873.84	2041.38
666	-38.2578	-31.0274	-23.9822	-14.4194	40.4679	256.199	639.239	964.354	1238.24	1469.04	1738.31	1889.64	2050.42
666.5	-39.1777	-30.3031	-24.1649	-13.6045	39.6227	259.443	632.485	969.214	1251.88	1463.2	1731.62	1894.52	2062.71
667	-39.2908	-31.1814	-24.4197	-14.0343	37.8451	261.549	632.375	971.514	1258.4	1461.97	1733.47	1893.28	2061.66
667.5	-37.6683	-29.8772	-25.6555	-13.557	39.6945	259.019	635.015	972.18	1255.42	1461.45	1738.72	1889.35	2061.51
668	-36.2787	-30.907	-25.0176	-13.7391	41.1217	257.17	628.741	969.419	1247.77	1469.39	1737.24	1883.73	2069.77
668.5	-37.9011	-30.7712	-24.5488	-14.8499	42.2919	259.263	625.517	964.788	1243.98	1476.01	1723.97	1878.7	2070.52
669	-38.7919	-31.8609	-23.4534	-14.2184	41.2031	258.343	623.189	962.086	1245.13	1473.05	1722.74	1879.03	2072.69
669.5	-40.8052	-32.3112	-24.6777	-14.5716	39.7005	260.774	624.555	965.115	1245.71	1471.58	1722.92	1873.44	2075.62
670	-40.3853	-31.868	-25.1618	-14.8347	39.0564	261.349	631.745	962.93	1248.3	1473.19	1728.29	1864.51	2075.96
670.5	-40.9515	-32.4935	-24.732	-13.8621	39.4481	260.329	631.795	962.79	1247.35	1472.9	1731.13	1860	2076.26
671	-42.3639	-31.1868	-23.9105	-14.4286	40.4061	258.187	631.975	960.328	1242.14	1473.22	1729.88	1860.89	2079.44
671.5	-41.0703	-30.4861	-23.0226	-14.6978	37.4602	258.547	633.93	954.12	1237.44	1475.67	1727.15	1855.64	2084.11
672	-40.3072	-31.1534	-22.6883	-13.3896	36.8212	257.495	638.368	950.965	1236.32	1476.45	1719.5	1855.84	2084.87
672.5	-39.6919	-31.9019	-20.9953	-15.445	37.5496	259.41	637.617	947.668	1238.3	1483.58	1724.67	1846.39	2082.67
673	-41.3302	-31.864	-19.4318	-15.7243	40.9487	260.289	637.434	949.405	1246.2	1479.93	1727.96	1841.76	2081.31
673.5	-43.5005	-32.3791	-19.1653	-15.7491	42.1989	258.651	634.125	946.053	1250.85	1480.62	1726.96	1845.1	2068.7
674	-43.7649	-32.2567	-21.8244	-16.5645	40.2974	257.601	634.318	951.862	1252.29	1478.22	1727.25	1844.06	2067.61
674.5	-45.252	-32.1947	-21.6427	-13.9576	41.3112	258.086	628.928	956.071	1256.08	1472.17	1724.51	1842.15	2074.3
675	-44.7461	-33.2444	-22.0344	-13.1785	41.9051	261.962	625.947	956.764	1263.84	1468.64	1721.51	1839.76	2074.34
675.5	-41.55	-32.7993	-21.652	-13.597	39.1801	260.48	627.497	957.963	1263.13	1466.64	1719.17	1844.96	2070.37
676	-40.2629	-31.4362	-22.8854	-12.0476	39.6563	259.446	629.141	961.339	1263.11	1469.58	1718.54	1844.12	2078.77
676.5	-39.6856	-32.0422	-21.8628	-10.5344	39.4269	260.233	629.881	965.509	1271.67	1468.47	1723.14	1849.37	2079.4
677	-39.2032	-32.6278	-21.5959	-14.0856	40.851	258.11	628.358	970.53	1271.71	1469.41	1721.22	1859.68	2072.35
677.5	-39.4689	-30.9497	-21.4718	-14.4935	41.1764	256.906	625.678	970.1	1272.4	1468.79	1716.49	1867.96	2072.46
678	-40.1027	-30.7368	-22.6535	-15.8195	43.2318	258.994	626.535	971.353	1271.68	1466.63	1710.12	1862.21	2073.17
678.5	-39.562	-29.6976	-24.5765	-14.5562	43.5318	260.447	624.165	972.411	1276.21	1471.76	1711.62	1865.32	2068.42
679	-37.2862	-28.6139	-24.7333	-13.9637	41.6204	258.958	621.301	972.152	1273.56	1475.26	1711.17	1866.73	2061.07
679.5	-37.3483	-28.9513	-23.2036	-12.5992	42.5128	258.685	619.648	977.87	1265.62	1483.8	1711.67	1869.32	2060.57
680	-38.5311	-29.8386	-24.4532	-13.4522	44.9374	260.701	619.491	979.194	1261.73	1488.06	1716.58	1864.77	2059.14
680.5	-37.1984	-28.534	-23.6332	-13.679	44.9581	260.415	617.398	977.374	1265.08	1486.44	1724.73	1860.02	2060.49
681	-37.5503	-30.3154	-23.1144	-13.0353	46.3926	257.049	617.031	979.465	1266.99	1484.44	1722.29	1861.38	2059.27
681.5	-39.3645	-30.7396	-22.7103	-12.766	47.4797	253.506	620.071	980.828	1263.53	1489.07	1712.65	1859.3	2057.21
682	-41.1733	-31.8885	-24.204	-12.485	46.8635	251.704	620.639	980.491	1257.71	1492.33	1703.21	1845.78	2051.26
682.5	-40.9502	-34.6409	-24.7018	-12.0561	45.708	253.372	621.708	978.697	1261.62	1489.24	1704.31	1844.06	2047.95
683	-40.2309	-35.3472	-24.1817	-12.4692	47.0298	253.685	623.5	977.872	1264.36	1482.82	1711.05	1857.26	2057.43
683.5	-40.6598	-34.5984	-24.3689	-13.3718	46.2088	250.706	622.071	978.157	1255.49	1488.78	1709.66	1870.41	2059.96
684	-42.1377	-34.3232	-26.048	-14.8423	46.2636	247.877	622.177	985.076	1249.34	1494.45	1710.92	1881.33	2045.48
684.5	-42.1786	-34.1642	-26.4802	-14.7648	45.1083	247.898	627.899	984.584	1246.72	1482.82	1711.69	1882.4	2041.87
685	-40.556	-34.5098	-22.601	-13.3661	42.4851	251.378	631.726	986.574	1249.96	1472.67	1718.29	1883.72	2043.09
685.5	-41.1386	-33.9166	-22.9851	-15.2905	44.6195	252.94	637.299	986.503	1247.25	1464.04	1718.93	1878.13	2040.43
686	-40.0987	-31.9769	-23.7748	-20.4792	45.8698	255.832	638.681	986.479	1248.72	1461.9	1718.26	1873.64	2041.02
686.5	-40.7535	-33.2293	-24.864	-16.8322	47.3488	257.284	636.092	982.25	1256.39	1471.3	1712.63	1870.61	2040.89
687	-41.1084	-32.9968	-23.4465	-15.9678	49.2773	258.655	633.787	977.362	1260.97	1484.39	1708.03	1871.25	2034.97
687.5	-40.2558	-32.9981	-22.7769	-14.7132	48.0433	260.11	634.018	974.13	1263	1485.98	1709.04	1875.73	2040.82
688	-41.4951	-33.0114	-22.609	-13.1038	46.336	260.034	637.325	972.294	1258.75	1485.07	1704.69	1878.27	2045.22
688.5	-39.1566	-33.7353	-22.3236	-15.5706	47.6807	257.266	639.598	966.857	1256.46	1484.08	1701.23	1876.72	2049.67
689	-39.8051	-34.2578	-21.7451	-15.318	49.7972	257.423	634.836	969.1	1260.54	1485.01	1699.19	1872.89	2055.13
689.5	-42.4844	-32.5057	-19.5989	-12.9997	48.8344	260.215	636.28	973.027	1257.21	1485.17	1698.72	1879	2057.95
690	-41.4849	-33.3808	-19.2689	-14.1849	46.8689	258.516	637.544	976.61	1256.52	1489.53	1698.89	1887.39	2061.58
690.5	-40.0397	-33.0956	-19.2668	-14.7455	46.1035	255.007	641.283	978.07	1260.9	1489.59	1695.7	1889.21	2063.54
691	-38.8905	-34.6902	-19.8597	-16.601	46.4802	255.637	645.184	976.069	1265.46	1490.4	1693.98	1886.42	2055.42
691.5	-38.8108	-31.0466	-21.3858	-14.2903	45.4844	257.42	639.301	974.437	1265.32	1494.69	1695.87	1884.88	2044.14
692	-38.1251	-32.9137	-21.7309	-15.0428	44.083	259.307	640.099	972.355	1268.72	1496.78	1699.07	1897.17	2041.08
692.5	-37.0332	-32.1575	-21.7345	-13.5555	44.8573	257.339	643.446	968.77	1273.73	1496.74	1696.42	1900.28	2032.71
693	-38.3923	-33.187	-23.0732	-12.9999	46.1037	255.173	640.365	967.271	1271.05	1498.11	1693.14	1890.71	2029.82
693.5	-37.1688	-32.7021	-23.6588	-11.9559	45.3395	254.218	641.554	961.472	1272.48	1493.33	1692.79	1877.16	2026.34
694	-37.9628	-31.2127	-22.9345	-12.3249	43.6446	261.031	638.936	962.175	1269.11	1489	1689.5	1871.35	2032.16
694.5	-38.3667	-31.5931	-24.0644	-14.4927	40.8449	262.393	640.036	965.09	1267.11	1495.94	1693.17	1874.4	2043.13
695	-39.0492	-31.4047	-25.3137	-14.7237	39.9894	260.646	640.36	962.981	1264.19	1500.46	1690.75	1877.39	2044.05
695.5	-38.4892	-32.1781	-23.6746	-13.5434	44.1319	265.134	638.815	966.049	1262.02	1502.85	1692.29	1878.55	2046.86
696	-41.0986	-31.3124	-21.0869	-13.3655	42.9662	263.701	639.985	964.632	1260.62	1509.67	1692.57	1889.43	2056.22
696.5	-39.3086	-31.4284	-21.5079	-13.3492	40.7404	263.234	638.077	965.543	1264.15	1513.54	1702.04	1888.88	2070.4
697	-37.3249	-30.9738	-22.4093	-14.3992	40.3794	259.779	634.379	972.594	1267.85	1510.98	1700.06	1880.17	2068.14
697.5	-40.4351	-29.876	-24.5583	-13.6947	41.0888	261.929	632.974	974.273	1269.77	1511.04	1692.21	1885.72	2048.04
698	-39.8565	-29.4887	-22.1804	-12.4875	39.2588	261.745	632.372	975.649	1265.68	1513.62	1683.9	1888.83	2039.03
698.5	-38.8329	-29.7971	-23.4987	-11.8173	39.2402	259.315	629.404	974.035	1262.98	1512.95	1682.43	1881.95	2031.92
699	-40.2465	-29.8597	-22.9502	-13.0669	39.3865	260.464	629.932	976.092	1259.73	1514.56	1681.25	1875.04	2026.05
699.5	-37.5529	-29.8712	-22.1233	-13.8622	38.9653	258.191	629.3	981.258	1257.31	1506.66	1679.57	1885.31	2026.61
700	-36.4248	-30.0704	-23.9798	-13.5627	39.7319	260.056	628.661	983.405	1261.56	1503.02	1685.57	1889.89	2027.8
700.5	-36.7727	-31.3462	-24.7632	-14.2981	38.66	260.641	630.938	983.025	1262.7	1503.41	1691.7	1887.85	2031.13
701	-36.4534	-32.44	-22.0579	-14.5782	41.899	263.027	636.563	980.717	1256.65	1495.78	1686.12	1879.19	2034.07
701.5	-36.1246	-33.0503	-22.6301	-14.166	43.4698	261.011	634.263	982.456	1255.74	1487.84	1686.84	1873.29	2035.99
702	-38.4475	-31.9151	-23.8582	-14.0571	45.7427	259.133	635.417	985.453	1255.49	1487.2	1690.62	1873.8	2029.69
702.5	-37.6794	-32.4294	-24.5176	-14.6949	44.7242	258.219	638.09	986.898	1248.64	1488.94	1692.3	1875.59	2030.54
703	-37.8238	-34.4276	-23.7514	-14.4411	43.9586	259.307	637.268	986.643	1243.64	1493.52	1686.13	1872.71	2030.15
703.5	-39.0005	-34.1527	-25.3019	-15.4735	43.3372	262.143	634.268	984.992	1241.76	1498.4	1685.61	1869.13	2025.24
704	-38.4561	-31.9742	-23.3709	-17.0354	43.6973	264.506	630.892	986.692	1237.99	1497.42	1686.66	1867.18	2024.21
704.5	-39.6901	-32.8436	-23.75	-15.3408	42.499	261.852	630.042	985.739	1240.29	1495.62	1688.86	1873.58	2029.46
705	-37.7294	-31.868	-22.546	-16.4012	39.5974	259.426	627.453	980.225	1236.72	1498.74	1687.2	1874.68	2029.66
[truncated: 10,090 more rows]

[truncated: 1 more sheets: GW-Q3 2018.04.20.0009 ]
