# Supplementary material for: Plural molecular and cellular mechanisms of pore domain KCNQ2 encephalopathy
Source: eLife. 2025 Jan 6;13:RP91204. doi: 10.7554/eLife.91204 (PMC11703504; doi:10.7554/eLife.91204)
Supplement: Figure 3—figure supplement 2—source data 1. [file elife-91204-fig3-figsupp2-data1.xlsx]

## Sheet: homo curve summary
WT	2018.03.22.0006	2018.03.22.0007	2018.03.29.0002	2018.03.29.0003	2018.04.05.0000	2018.04.05.0003	2018.05.10.0000	2018.05.10.0001	2018.05.10.0008	2018.05.10.0009		Q2-G256W	2018.04.12.0009	2018.04.22.0012	2018.03.29.0004	2018.03.29.0007	2018.03.29.0008	2018.03.29.0009	2018.03.30.0012	2018.03.30.0014	2018.03.30.0018	2018.04.05.0005	2018.04.05.0006	2018.04.05.0008	2018.04.05.0012	2018.04.05.0013	2018.05.11.0000	2018.05.11.0001	2018.05.11.0002	2018.05.11.0003	2018.05.11.0006
n=10												n=19
mV												mV
-80	0.0106411	0.0114951	0.0046348	0.00012699	0.0377039	0.00726414	0.013888	0.000628141	0.000253183	0.000227678		-80	0	0.0161998	0.0394863	0.00112998	0.137163	0	0	0.00628328	0.00198294	0.0108928	0.00681255	0.0322543	0.040378	0	0.0572496	0.0138863	0.0146705	0.0260853	0.00744669
-70	0	0.0043529	0.00910624	0.00785738	0.020496	7.41369e-05	0.0228418	0.0171904	0.00166603	0.00176012		-70	0.00181324	0.0150086	0.00832717	0.010409	0	0.00184122	0.0224588	0.004693	0.00380081	0.00118096	0.0150358	0.00531663	0	0.0172598	0.040597	0.0198606	0	0.00879197	0.00569616
-60	0.0243038	6.75856e-05	0.000163357	0	0.000127549	0.0144541	0.000457241	0.0214844	0.00227154	0.00394933		-60	0.00530831	0	0.00282851	0.0640209	0.0764853	0.0101266	0.0391929	0.000240197	0.000619532	0.000433895	0.00133035	0	0.0511065	0.0498119	0.0271509	0.018246	0.0476099	0.00508627	0
-50	0.0370468	0.0170048	0.0314634	0.0108575	0.0485904	0.0725734	0.126557	0.0251649	0.0194276	0.043574		-50	0.00848805	0.107919	7.91807e-05	0.0825789	0.0968812	0.0487914	0.0911565	0.00755551	0.00289188	0.00192802	0.029655	0.0348536	0.0604695	0.0830794	0.0224447	0.047714	0.0722456	0.016494	0.02937
-40	0.331844	0.101487	0.0832576	0.0903678	0.201705	0.258715	0.321302	0.167478	0.123373	0.229657		-40	0.0881391	0.45824	0.124716	0.222795	0.20651	0.222652	0.360662	0.0778461	0.104693	0.060199	0.109147	0.188682	0.111674	0.28966	0.110207	0.16276	0.279295	0.0537691	0.161271
-30	0.6629	0.322487	0.259879	0.319613	0.460525	0.520351	0.591409	0.455171	0.358915	0.502213		-30	0.328932	0.779378	0.397816	0.549622	0.376817	0.633893	0.594278	0.262955	0.348288	0.279089	0.34214	0.50331	0.416167	0.577621	0.287541	0.396164	0.524266	0.199745	0.395814
-20	0.914871	0.520223	0.481961	0.60278	0.691953	0.725466	0.776454	0.695018	0.603339	0.726169		-20	0.606016	0.886225	0.67	0.801185	0.687857	0.853388	0.649545	0.521536	0.616425	0.542056	0.607113	0.721174	0.766792	0.925409	0.549016	0.680994	0.794979	0.41998	0.664312
-10	0.974251	0.698778	0.693237	0.802929	0.808194	0.865072	0.886139	0.82629	0.794679	0.873722		-10	0.796957	0.997598	0.871617	0.949649	0.77505	0.996605	0.718022	0.73209	0.810483	0.690721	0.749651	0.835305	0.922745	0.943116	0.737263	0.885171	0.859475	0.625102	0.856148
0	0.977929	0.84856	0.800178	0.919187	0.890721	0.943363	0.921954	0.919529	0.903065	0.925606		0	0.90449	0.920292	0.999919	0.956866	0.940767	0.939529	0.921913	0.873625	0.935007	0.790828	0.835538	0.988897	0.999112	0.99722	0.896134	0.962515	0.966874	0.708153	0.940202
10	1	0.939164	0.902649	0.953981	0.946208	0.98111	0.935385	0.966763	0.941817	0.968953		10	0.95497	0.945664	0.994421	0.985734	0.955554	0.953469	0.886903	0.944234	0.999996	0.867029	0.883051	0.927105	0.964098	0.988635	0.978	0.99828	0.934211	0.821213	0.961903
20	0.918418	0.983854	0.954443	0.999808	0.996075	0.994692	0.999554	0.999274	0.98279	0.990626		20	0.959071	0.938278	0.996254	0.999137	0.965752	0.905335	0.876775	0.956956	1.02636	0.972365	0.99635	0.975664	0.936594	0.954027	0.947953	0.958559	0.996492	0.869097	0.999831
30	0.969915	0.999975	0.988724	0.99149	0.983082	0.999685	0.970454	0.961242	0.98057	0.999821		30	0.975337	0.863354	0.98434	0.964083	0.985129	0.819589	0.761178	0.965862	0.981818	0.999259	0.999091	0.910329	0.999599	0.926303	0.978	0.947902	0.762593	0.901504	0.944008
40	0.913557	0.993445	0.99953	0.964997	0.999938	0.992095	0.980154	0.980258	0.999946	0.994567		40	0.999172	0.881936	0.953181	0.990889	0.896916	0.861279	0.998096	0.999576	0.973183	0.999259	0.977162	0.996104	0.966732	0.873541	0.999307	0.9433	0.813248	0.99887	0.95026

## Sheet: homo current density summary
Q2		2018.03.22.0006	2018.03.22.0007	2018.03.29.0002	2018.03.29.0003	2018.04.05.0000	2018.04.05.0003	2018.05.10.0000	2018.05.10.0001	2018.05.10.0008	2018.05.10.0009		error				Q2G256W		2018.04.12.0009	2018.04.22.0012	2018.03.29.0004	2018.03.29.0007	2018.03.29.0008	2018.03.29.0009	2018.03.30.0012	2018.03.30.0014	2018.03.30.0018	2018.04.05.0005	2018.04.05.0006	2018.04.05.0008	2018.04.05.0012	2018.04.05.0013	2018.05.11.0000	2018.05.11.0001	2018.05.11.0002	2018.05.11.0003	2018.05.11.0006		error		G256W		2018.03.22.0000	2018.03.22.0005	2018.03.23.0012	2018.03.23.0014	2018.03.29.0011	2018.03.30.0000	2018.03.30.0002
n=10																	n=19																								n=11
mV																	mV																								mV
-80		0.23986	0.15609	-0.0773453	-0.058651	0.0405405	-0.02997	0.429104	-0.186747	-0.0730816	0.140152	0.0579952	0.0581392				-80		0	-0.0858013	0.421245	-0.347691	0.498105	-0.0351288	0.261005	0.195371	0.413483	-0.0611621	0.0407747	0	0.107751	0.568906	0.027907	-0.595349	-0.0634249	-0.0807292	-0.327175	0.049373	0.0683869		-80		0.122888	-0.37037	-0.0211193	-0.0768574	-0.203888	0.205643	0.1416
-70		0.161361	0.0153531	0	0.12056	0.165541	0.48951	0.284515	0.0722892	0.247665	0.32197	0.187876	0.0478462				-70		0.106698	0.102408	-0.0549451	0.0934094	-0.36275	-0.140515	0.0467472	-0.0382247	0.107865	0	-0.227659	0.19971	0.465763	0.299166	-0.027907	0.539535	-0.486258	0.111979	0.612009	0.0708964	0.0643977		-70		0.373784	-0.0281294	0.278071	-0.0768574	-0.113798	0.0286944	0.39801
-60		-0.104666	0.327533	0.304391	0	0.266892	0.519481	0.14459	0.0361446	-0.223305	0.462121	0.173318	0.0772601				-60		-0.0711322	0.370883	0.421245	0.223145	0.0649702	0	0.0701208	0.0382247	0.0539326	0.227659	-0.0611621	0.043573	0.465763	0	0.227907	0.395349	1.4852	0.302083	0.681293	0.25995	0.082776		-60		0.532514	0.487576	0.151355	0.183604	0.692271	-0.0286944	0.677382
-50		0.161361	0.795803	0.805888	0.436624	1.19595	5.60939	2.53265	1.25301	1.16525	2.65909	1.6615	0.507741				-50		0.432721	0.691946	-0.251832	0.378827	0.59556	0.357143	0.405142	0.180505	0.274157	0.105335	0.475705	0.442992	0.191171	0.240314	0.651163	0.967442	0.290698	0.380208	0.704388	0.395452	0.0609127		-50		0.373784	0.285982	0.513904	0.572161	1.10005	0.148254	0.512821
-40		1.88836	4.13767	1.87375	2.64581	5.95946	21.8581	5.89086	2.42771	8.22574	14.0568	6.89643	2.04052				-40		3.11203	2.04539	0.503663	1.17281	1.08825	2.14286	0.475263	1.76258	2.55281	1.57662	1.4509	1.61946	0.594369	2.15302	1.1907	1.98605	0.77167	0.380208	3.73364	1.59538	0.209482		-40		0.686124	0.285982	0.235832	0	0.374585	0.583453	0.65442
-30		3.56738	15.3685	6.03044	12.3493	14.3919	52.043	11.6698	10.5181	28.9931	35.6288	19.056	4.80612				-30		13.4973	4.0548	2.7381	4.43176	1.15864	5.363	1.61667	6.11807	9.87416	4.58376	4.29154	3.435	2.39833	5.12016	5.05116	4.34419	1.51691	1.65365	10.3118	4.81889	0.747591		-30		0.281618	0.257853	0.732137	0.546541	0.782361	0.994739	0.420972
-20		6.57654	28.457	14.2241	26.7286	26.1858	84.3257	17.4813	21.988	57.1458	60.178	34.3291	7.78714				-20		30.6106	5.0346	7.96703	6.83965	1.91662	7.89813	2.2127	14.7377	21.618	10.3058	8.81414	5.60639	5.72819	10.7749	11.6698	9.53953	3.06554	4.24479	19.8768	9.91899	1.68645		-20		-0.0921659	0.0562588	1.01021	0.209223	1.41773	0.49737	1.21316
-10		7.71915	44.5906	23.9696	41.5054	35.6926	115.06	22.8032	31.3614	85.7166	82.072	49.049	10.7427				-10		46.0937	6.5375	15.0092	12.2574	2.14943	11.6159	2.85158	24.5233	34.7011	16.1774	12.8372	6.96078	7.8276	12.8102	17.2326	13.5116	2.86998	6.42188	30.0462	14.865	2.66548		-10		0.93702	0.201594	1.9113	0	1.04315	0.526064	1.07539
0		9.18447	62.3618	31.3398	53.4767	44.4966	142.253	27.2435	41.8434	111.86	99.4811	62.354	13.3554				0		59.0812	6.90839	20.3434	14.3487	3.04277	11.4344	3.94624	34.1792	45.8876	20.9038	17.1526	9.06318	9.90615	14.9975	23.3907	16.8047	4.87315	9.0599	38.01	19.1228	3.486		0		0.281618	0.431317	1.86906	0.939368	0.753912	0.37781	0.91083
10		9.02311	76.9498	39.6856	62.0495	54.1689	163.836	32.7379	49.7831	129.777	115.367	73.3378	15.3195				10		68.7433	7.88818	23.7546	15.9315	4.09854	14.3326	4.73315	40.79	57.1685	24.8862	19.8879	10.1743	10.0348	16.7043	29.1535	19.6186	5.09514	11.0625	43.4142	22.4985	4.16446		10		0.435228	0.571964	2.53432	1.06746	2.17165	0.961263	2.15078
20		9.4505	90.2098	45.2121	72.2906	62.7264	183.077	35.9562	57.3554	150.049	129.932	83.6258	17.3191				20		76.4493	8.61611	25.9615	16.1858	3.60043	13.6885	5.44605	46.2986	63.9416	31.1927	23.561	10.8388	11.2861	17.7489	30.7442	20.693	5.12685	12.349	49.3841	24.9007	4.71868		20		0.593958	0.684482	2.66455	0.913749	1.53153	1.25299	1.86759
30		10.9943	100.642	50.8159	77.8983	66.0236	197.527	39.5429	59.4157	165.039	143.386	91.1285	18.8925				30		85.2045	9.0036	28.283	19.2579	4.72658	14.0105	5.46942	51.3145	68.9348	35.3585	26.6905	11.5686	12.3045	18.2884	35.0605	22.7116	4.45032	13.5104	51.3318	27.2358	5.19111		30		0.78341	0.886076	2.77015	0.88813	2.1432	0.961263	2.64064
40		11.2604	106.062	55.8583	81.639	73.0777	208.472	42.9011	66.6627	182.684	155.201	98.3817	20.2532				40		91.8969	9.56269	29.0064	21.4427	5.25176	15.2927	6.91858	56.8358	71.4876	37.6826	30.3194	12.6761	13.3438	19.7842	39.2326	24.586	6.03066	16.276	55.0462	29.6144	5.50624		40		0.967742	1.37365	2.96375	1.06746	1.99621	1.37255	2.82817
[truncated: 6 more columns]

## Sheet: WT 2018.04.05.0000
0	-36.6211	-28.6865	-15.8691	-16.4795	-16.4795	-9.76562	-14.6484	-12.207	-15.2588	-17.7002	-12.8174	-10.9863	-10.376
0.1	-40.8936	-23.8037	-17.0898	-19.5312	-14.6484	-15.2588	-10.376	-13.4277	-12.8174	-12.207	-15.2588	-10.9863	-14.0381
0.2	-39.6729	-29.2969	-17.7002	-17.7002	-11.5967	-10.9863	-11.5967	-18.9209	-10.9863	-15.8691	-9.15527	-17.0898	-13.4277
0.3	-34.1797	-25.0244	-15.8691	-19.5312	-14.6484	-13.4277	-12.8174	-15.2588	-10.9863	-16.4795	-13.4277	-13.4277	-9.76562				0.3125
0.4	-32.3486	-28.6865	-15.8691	-17.7002	-17.0898	-15.2588	-12.207	-6.71387	-11.5967	-12.207	-16.4795	-10.9863	-10.9863
0.5	-31.1279	-23.1934	-12.207	-15.2588	-17.0898	-11.5967	-13.4277	-13.4277	-11.5967	-17.0898	-11.5967	-7.93457	-14.0381
0.6	-26.8555	-24.4141	-17.0898	-17.0898	-12.207	-9.15527	-14.0381	-12.207	-15.8691	-15.8691	-11.5967	-9.15527	-9.15527
0.7	-34.1797	-23.8037	-14.0381	-17.7002	-15.8691	-11.5967	-12.207	-18.3105	-17.7002	-15.2588	-11.5967	-16.4795	-12.207
0.8	-29.9072	-24.4141	-17.0898	-20.752	-13.4277	-12.8174	-14.6484	-14.0381	-13.4277	-15.8691	-11.5967	-12.207	-14.6484
0.9	-38.4521	-27.4658	-20.1416	-15.8691	-14.0381	-9.15527	-15.8691	-14.0381	-16.4795	-11.5967	-12.8174	-15.8691	-12.207
1	-37.8418	-26.8555	-20.1416	-18.3105	-9.76562	-9.76562	-12.207	-15.8691	-18.9209	-14.6484	-11.5967	-12.207	-7.32422
1.1	-37.8418	-24.4141	-20.752	-17.7002	-11.5967	-7.93457	-18.3105	-6.10352	-14.6484	-17.0898	-9.76562	-12.8174	-14.6484
1.2	-36.0107	-30.5176	-14.6484	-20.752	-10.376	-10.9863	-12.207	-7.93457	-17.7002	-7.93457	-10.9863	-13.4277	-14.6484
1.3	-42.7246	-26.8555	-19.5312	-21.3623	-12.8174	-11.5967	-12.8174	-17.0898	-15.8691	-16.4795	-14.6484	-17.0898	-11.5967
1.4	-32.3486	-23.8037	-21.3623	-12.207	-11.5967	-7.93457	-16.4795	-10.9863	-17.0898	-9.15527	-10.9863	-14.0381	-6.71387
1.5	-32.3486	-23.8037	-18.3105	-21.3623	-17.7002	-9.76562	-10.9863	-11.5967	-15.8691	-12.8174	-7.32422	-18.9209	-16.4795
1.6	-34.1797	-21.3623	-14.0381	-14.0381	-14.6484	-9.76562	-10.9863	-14.6484	-15.2588	-16.4795	-11.5967	-19.5312	-14.0381
1.7	-34.1797	-23.1934	-18.9209	-15.8691	-6.10352	-17.0898	-7.32422	-7.32422	-18.3105	-11.5967	-11.5967	-9.76562	-12.207
1.8	-37.2314	-27.4658	-20.752	-19.5312	-12.8174	-10.9863	-10.376	-11.5967	-13.4277	-15.8691	-9.15527	-15.2588	-12.8174
1.9	-40.2832	-23.1934	-17.7002	-13.4277	-10.9863	-14.6484	-9.76562	-12.8174	-10.9863	-14.6484	-9.15527	-12.8174	-7.32422
2	-37.8418	-23.1934	-18.3105	-17.7002	-12.8174	-14.0381	-14.6484	-15.2588	-8.54492	-15.8691	-10.9863	-12.8174	-12.207
2.1	-32.959	-26.8555	-15.2588	-21.3623	-12.8174	-13.4277	-14.6484	-15.8691	-11.5967	-14.6484	-16.4795	-20.752	-11.5967
2.2	-41.5039	-26.2451	-21.3623	-23.8037	-9.76562	-11.5967	-12.207	-12.207	-14.0381	-13.4277	-7.93457	-13.4277	-14.6484
2.3	-39.0625	-23.1934	-18.9209	-17.7002	-10.9863	-7.32422	-8.54492	-10.9863	-21.9727	-11.5967	-14.6484	-14.0381	-10.9863
2.4	-35.4004	-23.8037	-17.7002	-20.1416	-10.376	-12.207	-11.5967	-12.8174	-14.0381	-12.8174	-17.0898	-14.6484	-13.4277
2.5	-34.79	-21.9727	-17.7002	-17.7002	-14.6484	-12.8174	-9.15527	-8.54492	-14.0381	-11.5967	-10.9863	-16.4795	-13.4277
2.6	-32.3486	-25.6348	-12.8174	-22.583	-12.8174	-14.6484	-11.5967	-10.9863	-14.0381	-16.4795	-7.32422	-12.207	-14.6484
2.7	-33.5693	-28.6865	-17.0898	-18.9209	-9.15527	-9.15527	-12.207	-12.8174	-14.6484	-12.8174	-13.4277	-14.0381	-12.8174
2.8	-40.2832	-27.4658	-13.4277	-18.3105	-13.4277	-12.8174	-14.6484	-10.376	-12.8174	-16.4795	-10.9863	-9.15527	-10.9863
2.9	-33.5693	-26.2451	-18.3105	-15.8691	-13.4277	-12.207	-12.207	-7.32422	-14.6484	-10.9863	-9.76562	-12.207	-15.2588
3	-37.8418	-21.9727	-18.3105	-16.4795	-13.4277	-7.93457	-13.4277	-12.207	-10.9863	-14.6484	-9.76562	-14.0381	-12.8174
3.1	-33.5693	-23.1934	-12.8174	-21.3623	-10.9863	-10.376	-15.2588	-13.4277	-14.0381	-11.5967	-4.88281	-12.8174	-11.5967
3.2	-33.5693	-25.0244	-17.0898	-18.9209	-11.5967	-16.4795	-13.4277	-15.2588	-14.0381	-10.9863	-18.3105	-12.207	-14.6484
3.3	-39.6729	-25.0244	-19.5312	-15.8691	-13.4277	-9.15527	-8.54492	-14.6484	-17.0898	-13.4277	-12.207	-10.376	-13.4277
3.4	-34.79	-27.4658	-15.8691	-18.3105	-11.5967	-14.0381	-17.7002	-9.15527	-16.4795	-19.5312	-10.376	-15.8691	-13.4277
3.5	-28.6865	-25.6348	-20.752	-17.0898	-14.6484	-15.8691	-15.8691	-12.8174	-10.9863	-9.15527	-11.5967	-14.6484	-14.0381
3.6	-33.5693	-21.9727	-17.7002	-15.8691	-12.8174	-9.15527	-18.3105	-14.6484	-17.0898	-13.4277	-12.207	-15.8691	-10.9863
3.7	-32.3486	-27.4658	-19.5312	-9.76562	-10.9863	-13.4277	-14.0381	-12.207	-16.4795	-8.54492	-10.376	-9.76562	-8.54492
3.8	-32.3486	-24.4141	-20.1416	-14.6484	-10.9863	-12.207	-11.5967	-10.376	-19.5312	-17.0898	-16.4795	-10.9863	-18.3105
3.9	-32.959	-21.9727	-21.9727	-17.0898	-9.76562	-10.376	-14.0381	-14.6484	-14.0381	-6.10352	-9.76562	-13.4277	-12.8174
4	-37.2314	-24.4141	-15.8691	-18.3105	-18.9209	-13.4277	-14.0381	-10.9863	-19.5312	-11.5967	-15.8691	-17.0898	-8.54492
4.1	-29.2969	-23.1934	-18.9209	-21.3623	-12.8174	-12.207	-14.6484	-15.8691	-16.4795	-14.6484	-17.0898	-15.2588	-13.4277
4.2	-32.3486	-23.1934	-13.4277	-17.0898	-13.4277	-12.8174	-12.8174	-11.5967	-14.0381	-10.9863	-14.6484	-11.5967	-6.10352
4.3	-36.0107	-22.583	-17.0898	-16.4795	-12.8174	-7.93457	-11.5967	-14.0381	-15.2588	-12.207	-10.9863	-19.5312	-10.376
4.4	-39.6729	-25.6348	-23.1934	-14.6484	-15.2588	-16.4795	-14.0381	-4.88281	-9.76562	-11.5967	-9.15527	-12.207	-13.4277
4.5	-37.8418	-23.8037	-17.0898	-12.207	-8.54492	-15.8691	-16.4795	-10.9863	-12.8174	-14.6484	-13.4277	-10.376	-10.376
4.6	-35.4004	-29.2969	-15.8691	-15.8691	-10.9863	-9.76562	-16.4795	-13.4277	-15.2588	-13.4277	-6.71387	-15.2588	-10.376
4.7	-36.0107	-24.4141	-21.9727	-18.3105	-15.8691	-8.54492	-10.9863	-13.4277	-15.2588	-14.6484	-17.0898	-12.207	-16.4795
4.8	-35.4004	-21.9727	-20.1416	-12.207	-12.8174	-9.15527	-16.4795	-15.2588	-13.4277	-13.4277	-9.15527	-21.3623	-15.2588
4.9	-37.2314	-26.8555	-19.5312	-11.5967	-9.76562	-12.207	-12.8174	-12.207	-17.0898	-7.93457	-6.10352	-19.5312	-14.6484
5	-41.5039	-26.2451	-18.9209	-15.2588	-12.207	-12.207	-17.0898	-14.6484	-14.6484	-14.6484	-9.76562	-18.3105	-14.0381
5.1	-32.959	-23.8037	-21.3623	-24.4141	-9.15527	-14.6484	-14.6484	-15.2588	-13.4277	-7.32422	-10.9863	-15.2588	-12.207
5.2	-34.1797	-16.4795	-21.9727	-17.0898	-12.207	-13.4277	-11.5967	-11.5967	-16.4795	-9.15527	-7.32422	-14.6484	-9.76562
5.3	-34.79	-20.752	-25.0244	-17.0898	-15.8691	-14.0381	-18.3105	-14.6484	-14.6484	-17.0898	-9.76562	-12.8174	-12.207
5.4	-40.2832	-26.8555	-24.4141	-21.3623	-15.2588	-10.376	-13.4277	-17.0898	-14.0381	-13.4277	-9.76562	-16.4795	-15.2588
5.5	-32.959	-29.9072	-19.5312	-17.7002	-13.4277	-16.4795	-19.5312	-7.93457	-17.7002	-9.15527	-14.6484	-7.93457	-9.15527
5.6	-40.2832	-20.752	-18.3105	-14.6484	-14.0381	-9.76562	-13.4277	-9.76562	-15.2588	-12.207	-12.207	-17.0898	-17.7002
5.7	-32.3486	-21.3623	-25.6348	-23.8037	-13.4277	-6.10352	-17.0898	-7.32422	-10.376	-14.6484	-14.0381	-11.5967	-17.0898
5.8	-39.0625	-27.4658	-17.0898	-18.9209	-16.4795	-12.8174	-17.7002	-14.0381	-12.207	-15.2588	-7.93457	-7.32422	-6.71387
5.9	-34.1797	-27.4658	-15.8691	-18.9209	-13.4277	-9.15527	-10.9863	-11.5967	-17.7002	-12.8174	-16.4795	-10.9863	-9.76562
6	-34.1797	-22.583	-17.0898	-23.1934	-10.9863	-12.8174	-13.4277	-10.9863	-17.0898	-10.9863	-12.207	-15.2588	-14.6484
6.1	-35.4004	-25.6348	-18.3105	-22.583	-18.9209	-15.8691	-4.27246	-15.8691	-10.9863	-7.32422	-17.7002	-20.1416	-12.207
6.2	-28.6865	-26.2451	-15.8691	-17.0898	-14.6484	-9.15527	-13.4277	-15.2588	-16.4795	-8.54492	-7.32422	-17.0898	-14.6484
6.3	-32.3486	-20.752	-17.7002	-18.3105	-12.207	-10.9863	-10.376	-6.10352	-18.3105	-14.0381	-7.93457	-14.0381	-14.0381
6.4	-35.4004	-21.9727	-14.6484	-15.2588	-15.8691	-10.9863	-7.32422	-18.9209	-19.5312	-13.4277	-7.32422	-10.376	-11.5967
6.5	-37.8418	-21.3623	-20.1416	-17.0898	-9.76562	-7.32422	-17.7002	-7.32422	-17.0898	-14.0381	-13.4277	-11.5967	-14.0381
6.6	-34.79	-27.4658	-17.7002	-17.7002	-14.6484	-15.2588	-13.4277	-7.93457	-15.2588	-14.6484	-16.4795	-15.8691	-10.376
6.7	-35.4004	-27.4658	-18.9209	-20.752	-8.54492	-5.49316	-7.32422	-12.207	-10.376	-14.6484	-7.32422	-10.376	-10.376
6.8	-34.79	-25.6348	-17.7002	-17.7002	-14.6484	-12.8174	-12.207	-13.4277	-13.4277	-11.5967	-12.8174	-14.6484	-13.4277
6.9	-42.7246	-27.4658	-17.7002	-18.9209	-17.7002	-10.376	-15.2588	-9.76562	-13.4277	-9.15527	-16.4795	-15.8691	-10.9863
7	-34.1797	-25.0244	-16.4795	-15.8691	-15.8691	-15.2588	-10.9863	-12.207	-9.76562	-10.9863	-12.207	-16.4795	-8.54492
7.1	-36.6211	-24.4141	-18.3105	-21.3623	-16.4795	-8.54492	-10.376	-14.0381	-12.8174	-18.3105	-7.32422	-12.8174	-11.5967
7.2	-36.0107	-20.1416	-16.4795	-20.752	-15.2588	-10.376	-10.9863	-15.8691	-18.3105	-8.54492	-9.15527	-15.8691	-10.9863
7.3	-31.1279	-25.6348	-17.7002	-16.4795	-7.93457	-10.376	-10.9863	-13.4277	-12.207	-15.2588	-15.2588	-6.71387	-13.4277
7.4	-34.1797	-23.1934	-13.4277	-19.5312	-14.6484	-11.5967	-13.4277	-11.5967	-10.9863	-9.15527	-9.76562	-15.2588	-12.8174
7.5	-35.4004	-25.0244	-20.1416	-18.9209	-12.8174	-13.4277	-15.2588	-9.15527	-20.1416	-9.15527	-12.207	-17.0898	-11.5967
7.6	-28.6865	-28.6865	-15.8691	-23.8037	-13.4277	-14.6484	-12.8174	-14.6484	-14.6484	-14.6484	-12.207	-14.6484	-14.6484
7.7	-33.5693	-25.0244	-19.5312	-11.5967	-9.76562	-8.54492	-14.6484	-6.71387	-21.9727	-14.6484	-15.8691	-21.3623	-11.5967
7.8	-35.4004	-27.4658	-19.5312	-13.4277	-13.4277	-15.2588	-14.6484	-7.93457	-12.207	-17.7002	-12.207	-13.4277	-17.0898
7.9	-37.2314	-31.7383	-20.1416	-14.6484	-9.15527	-6.71387	-14.0381	-17.0898	-14.6484	-10.9863	-13.4277	-13.4277	-6.10352
8	-43.9453	-25.0244	-15.8691	-20.752	-7.32422	-15.2588	-9.15527	-9.76562	-10.376	-10.9863	-15.2588	-9.15527	-11.5967
8.1	-32.3486	-20.752	-15.8691	-16.4795	-12.207	-16.4795	-18.3105	-14.6484	-14.0381	-12.8174	-14.0381	-11.5967	-8.54492
8.2	-32.959	-26.2451	-17.0898	-15.8691	-17.0898	-12.8174	-15.2588	-13.4277	-15.8691	-14.0381	-9.15527	-10.9863	-14.0381
8.3	-32.959	-29.9072	-17.0898	-14.6484	-10.9863	-13.4277	-16.4795	-14.0381	-14.0381	-14.6484	-10.376	-14.6484	-9.15527
8.4	-38.4521	-22.583	-20.752	-23.1934	-4.88281	-4.88281	-12.207	-10.9863	-15.8691	-9.15527	-14.0381	-14.0381	-15.2588
8.5	-34.1797	-23.8037	-25.6348	-18.3105	-14.0381	-16.4795	-17.7002	-13.4277	-15.2588	-14.6484	-10.9863	-18.3105	-12.8174
8.6	-32.3486	-23.1934	-21.3623	-17.7002	-14.6484	-9.15527	-12.207	-8.54492	-15.2588	-18.3105	-10.376	-10.9863	-12.207
8.7	-37.2314	-23.8037	-17.0898	-14.0381	-11.5967	-7.32422	-13.4277	-12.8174	-9.15527	-12.207	-12.207	-13.4277	-7.93457
8.8	-33.5693	-24.4141	-12.207	-15.2588	-12.207	-12.8174	-17.0898	-9.76562	-14.6484	-6.10352	-14.6484	-12.207	-8.54492
8.9	-35.4004	-21.3623	-20.1416	-17.7002	-6.10352	-17.7002	-9.15527	-15.2588	-15.8691	-15.8691	-12.207	-15.8691	-10.376
9	-37.2314	-30.5176	-11.5967	-14.6484	-14.0381	-16.4795	-12.8174	-13.4277	-15.8691	-13.4277	-17.0898	-11.5967	-16.4795
9.1	-35.4004	-22.583	-17.0898	-12.207	-8.54492	-9.76562	-9.76562	-17.7002	-12.8174	-15.2588	-17.0898	-9.15527	-12.8174
9.2	-31.1279	-21.9727	-14.0381	-18.3105	-12.207	-10.9863	-10.9863	-9.15527	-17.7002	-12.8174	-14.0381	-13.4277	-10.9863
9.3	-32.959	-21.3623	-12.8174	-14.0381	-7.93457	-12.207	-18.9209	-9.76562	-12.207	-7.32422	-10.376	-18.9209	-13.4277
9.4	-33.5693	-30.5176	-14.0381	-17.7002	-10.9863	-14.0381	-12.207	-7.32422	-10.376	-14.0381	-10.9863	-21.9727	-9.76562
9.5	-34.1797	-23.8037	-19.5312	-15.2588	-13.4277	-10.376	-14.6484	-14.0381	-15.2588	-20.752	-17.0898	-12.8174	-12.8174
9.6	-35.4004	-26.2451	-15.8691	-13.4277	-6.71387	-13.4277	-8.54492	-15.2588	-18.3105	-10.9863	-8.54492	-12.8174	-15.8691
9.7	-31.7383	-26.2451	-15.8691	-19.5312	-12.8174	-18.3105	-15.2588	-13.4277	-10.9863	-14.0381	-11.5967	-10.9863	-9.15527
9.8	-33.5693	-25.6348	-23.1934	-10.9863	-9.15527	-7.32422	-10.9863	-10.9863	-9.76562	-14.6484	-13.4277	-21.3623	-11.5967
9.9	-37.8418	-25.0244	-20.752	-16.4795	-10.9863	-17.7002	-15.8691	-9.76562	-12.8174	-13.4277	-14.6484	-9.15527	-14.6484
10	-32.3486	-21.3623	-19.5312	-17.7002	-9.76562	-10.376	-18.9209	-10.376	-15.8691	-14.6484	-16.4795	-15.2588	-14.6484
10.1	-33.5693	-22.583	-21.9727	-11.5967	-13.4277	-12.207	-13.4277	-7.32422	-14.0381	-15.8691	-14.6484	-10.376	-8.54492
10.2	-34.1797	-17.7002	-17.7002	-15.8691	-10.9863	-10.376	-7.93457	-13.4277	-9.76562	-12.8174	-14.6484	-17.0898	-9.76562
10.3	-29.2969	-20.1416	-18.3105	-14.0381	-14.6484	-14.0381	-15.2588	-8.54492	-16.4795	-10.9863	-16.4795	-17.0898	-10.9863
10.4	-39.6729	-23.8037	-12.8174	-18.3105	-10.9863	-18.9209	-17.0898	-14.6484	-15.8691	-17.0898	-11.5967	-9.15527	-13.4277
10.5	-32.959	-25.6348	-12.207	-12.207	-10.376	-11.5967	-9.15527	-14.6484	-13.4277	-15.2588	-15.2588	-14.6484	-15.2588
10.6	-39.6729	-24.4141	-18.3105	-12.207	-12.207	-20.1416	-11.5967	-13.4277	-13.4277	-12.207	-12.207	-9.76562	-7.93457
10.7	-43.335	-21.9727	-20.1416	-13.4277	-12.8174	-14.6484	-12.207	-7.93457	-15.2588	-14.0381	-14.6484	-12.207	-9.15527
10.8	-39.6729	-20.752	-17.7002	-16.4795	-8.54492	-8.54492	-12.207	-13.4277	-11.5967	-11.5967	-14.0381	-12.8174	-11.5967
10.9	-35.4004	-19.5312	-14.6484	-15.8691	-10.9863	-12.8174	-15.2588	-16.4795	-14.6484	-8.54492	-10.9863	-20.1416	-12.8174
11	-36.0107	-28.6865	-19.5312	-14.0381	-10.9863	-12.207	-15.2588	-14.0381	-13.4277	-15.2588	-14.6484	-12.207	-8.54492
11.1	-39.0625	-26.2451	-14.0381	-15.8691	-16.4795	-10.9863	-12.8174	-14.0381	-13.4277	-14.6484	-12.8174	-20.1416	-12.207
11.2	-40.2832	-29.9072	-14.6484	-17.0898	-7.93457	-7.93457	-8.54492	-6.71387	-10.9863	-12.207	-12.8174	-10.9863	-7.93457
11.3	-42.1143	-21.9727	-20.1416	-15.2588	-15.2588	-11.5967	-12.8174	-7.32422	-14.0381	-18.9209	-9.15527	-14.0381	-10.9863
11.4	-37.8418	-23.1934	-15.2588	-20.752	-6.71387	-10.376	-13.4277	-12.207	-10.376	-7.93457	-12.207	-10.9863	-16.4795
11.5	-40.2832	-24.4141	-11.5967	-12.207	-12.8174	-10.9863	-9.15527	-12.8174	-13.4277	-18.9209	-14.6484	-12.207	-14.6484
11.6	-37.2314	-24.4141	-17.7002	-13.4277	-9.76562	-14.0381	-13.4277	-11.5967	-14.6484	-10.9863	-14.0381	-14.0381	-14.0381
11.7	-32.959	-25.0244	-19.5312	-18.3105	-10.9863	-10.376	-13.4277	-8.54492	-14.6484	-14.0381	-18.3105	-9.15527	-7.93457
11.8	-31.1279	-22.583	-19.5312	-17.0898	-18.9209	-10.9863	-7.93457	-13.4277	-14.0381	-19.5312	-9.76562	-15.2588	-16.4795
11.9	-39.6729	-21.9727	-18.9209	-22.583	-14.6484	-10.376	-11.5967	-14.6484	-12.207	-8.54492	-17.7002	-14.6484	-15.8691
12	-33.5693	-20.752	-21.3623	-17.0898	-10.9863	-8.54492	-13.4277	-10.9863	-12.8174	-12.207	-15.2588	-9.15527	-10.9863
12.1	-29.2969	-21.9727	-19.5312	-10.9863	-10.9863	-13.4277	-9.76562	-10.376	-7.32422	-14.0381	-9.15527	-11.5967	-9.76562
12.2	-40.8936	-22.583	-21.3623	-15.2588	-14.0381	-11.5967	-15.8691	-14.0381	-10.376	-14.0381	-14.6484	-17.7002	-6.71387
12.3	-34.79	-28.0762	-16.4795	-20.752	-10.376	-15.2588	-15.2588	-10.9863	-17.7002	-11.5967	-7.93457	-14.6484	-10.376
12.4	-32.959	-23.1934	-17.7002	-15.2588	-9.76562	-13.4277	-11.5967	-10.376	-9.76562	-12.207	-13.4277	-10.376	-10.9863
12.5	-37.2314	-18.9209	-20.752	-7.32422	-15.8691	-10.376	-18.9209	-12.207	-13.4277	-18.9209	-16.4795	-9.76562	-12.8174
12.6	-38.4521	-21.3623	-20.752	-20.752	-12.207	-9.76562	-14.0381	-10.9863	-15.8691	-18.9209	-4.88281	-15.8691	-6.71387
12.7	-40.2832	-21.9727	-16.4795	-11.5967	-10.9863	-12.207	-15.2588	-7.32422	-15.8691	-7.93457	-17.0898	-12.8174	-17.7002
12.8	-34.1797	-23.1934	-15.8691	-17.7002	-8.54492	-8.54492	-9.76562	-17.0898	-12.207	-13.4277	-16.4795	-8.54492	-10.9863
12.9	-37.2314	-27.4658	-16.4795	-11.5967	-13.4277	-11.5967	-7.93457	-9.15527	-10.9863	-20.752	-6.71387	-14.0381	-14.6484
13	-40.2832	-21.9727	-12.8174	-17.0898	-14.6484	-12.8174	-7.32422	-13.4277	-10.9863	-10.9863	-11.5967	-14.6484	-3.66211
13.1	-34.1797	-29.2969	-17.0898	-14.6484	-13.4277	-12.8174	-9.15527	-13.4277	-14.0381	-9.15527	-10.9863	-13.4277	-14.6484
13.2	-35.4004	-23.1934	-21.9727	-18.3105	-13.4277	-15.2588	-14.0381	-14.0381	-12.207	-15.2588	-14.6484	-12.8174	-15.2588
13.3	-33.5693	-25.6348	-21.3623	-16.4795	-13.4277	-18.3105	-5.49316	-13.4277	-10.376	-15.2588	-10.376	-15.8691	-14.6484
13.4	-34.79	-24.4141	-14.6484	-16.4795	-12.8174	-17.7002	-14.0381	-14.6484	-16.4795	-9.15527	-8.54492	-8.54492	-11.5967
13.5	-40.8936	-23.1934	-22.583	-13.4277	-12.8174	-13.4277	-12.8174	-12.207	-17.0898	-10.376	-8.54492	-12.207	-12.207
13.6	-32.3486	-21.9727	-17.7002	-12.8174	-12.207	-14.6484	-10.9863	-14.0381	-18.3105	-18.3105	-9.76562	-14.6484	-14.0381
13.7	-36.0107	-26.8555	-18.9209	-14.6484	-19.5312	-17.7002	-11.5967	-14.6484	-11.5967	-8.54492	-9.15527	-12.207	-10.9863
13.8	-32.959	-18.9209	-16.4795	-11.5967	-17.0898	-10.376	-10.376	-10.9863	-17.0898	-11.5967	-12.8174	-10.9863	-8.54492
13.9	-28.6865	-31.7383	-14.6484	-10.376	-7.93457	-13.4277	-13.4277	-13.4277	-12.8174	-12.207	-18.9209	-10.9863	-12.8174
14	-34.79	-25.6348	-14.6484	-19.5312	-15.8691	-10.376	-10.9863	-9.15527	-11.5967	-17.7002	-7.32422	-16.4795	-15.2588
14.1	-30.5176	-23.8037	-12.207	-15.2588	-12.207	-12.8174	-14.0381	-13.4277	-12.8174	-10.376	-4.88281	-7.32422	-7.32422
14.2	-37.2314	-21.9727	-21.3623	-15.8691	-12.8174	-11.5967	-17.0898	-11.5967	-15.2588	-14.6484	-9.15527	-10.9863	-15.2588
14.3	-36.6211	-25.0244	-20.752	-19.5312	-14.0381	-12.207	-12.8174	-12.207	-15.2588	-17.0898	-8.54492	-14.6484	-12.207
14.4	-32.959	-23.8037	-18.9209	-17.7002	-14.6484	-17.7002	-12.8174	-14.6484	-12.207	-10.376	-11.5967	-9.15527	-13.4277
14.5	-38.4521	-28.0762	-16.4795	-14.6484	-13.4277	-7.32422	-9.15527	-15.8691	-11.5967	-10.9863	-14.6484	-19.5312	-15.2588
14.6	-42.1143	-27.4658	-11.5967	-17.7002	-15.8691	-14.0381	-9.76562	-9.15527	-11.5967	-13.4277	-10.9863	-12.8174	-10.376
14.7	-30.5176	-25.6348	-15.2588	-12.207	-12.8174	-15.2588	-14.6484	-15.8691	-12.207	-10.9863	-16.4795	-9.76562	-15.8691
14.8	-34.79	-26.8555	-20.752	-17.7002	-14.6484	-18.3105	-8.54492	-10.376	-15.2588	-19.5312	-13.4277	-13.4277	-13.4277
14.9	-42.7246	-26.8555	-21.3623	-14.6484	-17.0898	-10.376	-9.15527	-8.54492	-12.207	-9.76562	-17.0898	-6.10352	-10.376
15	-30.5176	-25.0244	-23.1934	-13.4277	-14.6484	-14.6484	-15.8691	-12.8174	-16.4795	-9.76562	-9.76562	-17.7002	-13.4277
15.1	-37.8418	-25.0244	-15.8691	-23.1934	-12.8174	-6.71387	-10.376	-17.7002	-16.4795	-13.4277	-11.5967	-15.2588	-14.0381
15.2	-30.5176	-30.5176	-14.6484	-15.2588	-14.0381	-10.9863	-10.9863	-12.8174	-17.0898	-17.7002	-18.9209	-10.9863	-15.8691
15.3	-37.2314	-25.0244	-12.207	-15.8691	-13.4277	-12.207	-1.2207	-12.8174	-12.8174	-16.4795	-15.8691	-12.207	-12.8174
15.4	-39.0625	-18.3105	-15.8691	-14.6484	-18.9209	-10.9863	-14.0381	-15.8691	-12.207	-14.6484	-12.207	-13.4277	-7.32422
15.5	-31.7383	-21.3623	-20.1416	-20.1416	-16.4795	-14.6484	-11.5967	-12.207	-14.6484	-11.5967	-9.76562	-10.9863	-17.0898
15.6	-30.5176	-26.2451	-14.0381	-18.3105	-12.8174	-12.207	-12.8174	-13.4277	-15.8691	-12.207	-7.93457	-8.54492	-5.49316
15.7	-32.3486	-25.0244	-19.5312	-12.8174	-18.9209	-4.88281	-16.4795	-15.8691	-13.4277	-7.93457	-7.32422	-13.4277	-14.0381
15.8	-38.4521	-23.1934	-19.5312	-18.3105	-12.8174	-9.15527	-12.8174	-6.10352	-15.8691	-10.9863	-16.4795	-14.0381	-18.3105
15.9	-42.7246	-28.0762	-21.3623	-14.6484	-14.0381	-9.15527	-9.76562	-15.2588	-10.9863	-12.207	-12.207	-12.207	-10.9863
16	-32.3486	-23.1934	-21.9727	-21.3623	-4.88281	-10.9863	-12.207	-11.5967	-18.3105	-10.9863	-10.376	-15.2588	-10.9863
16.1	-32.3486	-24.4141	-17.0898	-18.9209	-10.9863	-14.6484	-1.2207	-17.7002	-13.4277	-12.8174	-11.5967	-10.9863	-12.8174
16.2	-39.0625	-21.3623	-17.7002	-12.8174	-12.207	-8.54492	-15.8691	-9.15527	-10.376	-14.0381	-14.6484	-14.6484	-15.2588
16.3	-33.5693	-26.2451	-14.0381	-15.8691	-12.207	-11.5967	-12.207	-6.10352	-13.4277	-11.5967	-11.5967	-12.8174	-14.6484
16.4	-35.4004	-24.4141	-14.6484	-14.0381	-12.207	-7.32422	-8.54492	-10.9863	-17.7002	-12.207	-10.376	-20.752	-14.0381
16.5	-33.5693	-26.8555	-15.8691	-16.4795	-12.207	-17.0898	-15.8691	-13.4277	-15.8691	-16.4795	-8.54492	-9.15527	-9.15527
16.6	-38.4521	-25.6348	-16.4795	-17.0898	-15.8691	-12.207	-11.5967	-16.4795	-9.15527	-9.76562	-13.4277	-14.6484	-17.0898
16.7	-37.2314	-23.1934	-18.3105	-20.1416	-9.76562	-10.376	-8.54492	-12.207	-13.4277	-11.5967	-17.0898	-10.9863	-14.6484
16.8	-33.5693	-21.9727	-13.4277	-16.4795	-14.6484	-12.207	-17.0898	-14.6484	-13.4277	-17.0898	-15.2588	-17.0898	-18.3105
16.9	-32.959	-26.2451	-13.4277	-19.5312	-12.207	-9.76562	-8.54492	-11.5967	-14.0381	-12.207	-14.6484	-16.4795	-11.5967
17	-36.0107	-30.5176	-21.3623	-13.4277	-14.6484	-8.54492	-17.0898	-14.6484	-15.2588	-16.4795	-12.8174	-14.6484	-12.207
17.1	-35.4004	-18.3105	-19.5312	-13.4277	-17.0898	-7.32422	-14.0381	-14.0381	-15.2588	-19.5312	-11.5967	-19.5312	-14.6484
17.2	-32.3486	-18.9209	-15.2588	-17.0898	-9.15527	-16.4795	-14.0381	-22.583	-10.9863	-13.4277	-4.88281	-12.8174	-12.207
17.3	-39.0625	-31.1279	-17.0898	-14.6484	-10.9863	-8.54492	-12.8174	-14.0381	-11.5967	-10.9863	-10.376	-11.5967	-9.15527
17.4	-40.2832	-26.8555	-21.9727	-18.3105	-21.3623	-9.15527	-8.54492	-12.207	-12.207	-10.9863	-9.76562	-14.6484	-15.8691
17.5	-38.4521	-24.4141	-20.1416	-14.0381	-12.207	-8.54492	-6.10352	-10.9863	-14.6484	-16.4795	-8.54492	-14.0381	-10.376
17.6	-43.335	-23.1934	-17.7002	-16.4795	-15.8691	-7.32422	-13.4277	-10.9863	-9.15527	-9.15527	-14.0381	-12.207	-7.93457
17.7	-43.9453	-23.1934	-14.6484	-11.5967	-12.207	-10.9863	-14.6484	-12.207	-8.54492	-10.9863	-12.8174	-12.207	-8.54492
17.8	-35.4004	-30.5176	-16.4795	-16.4795	-11.5967	-11.5967	-15.8691	-12.207	-15.8691	-12.207	-13.4277	-19.5312	-8.54492
17.9	-32.3486	-27.4658	-18.3105	-14.6484	-14.6484	-9.76562	-14.6484	-17.7002	-17.0898	-14.0381	-10.9863	-12.207	-11.5967
18	-36.0107	-24.4141	-16.4795	-15.8691	-5.49316	-9.15527	-10.376	-14.6484	-15.2588	-15.2588	-12.8174	-11.5967	-14.6484
18.1	-39.0625	-26.2451	-15.8691	-17.7002	-14.0381	-7.32422	-10.9863	-8.54492	-20.1416	-14.0381	-14.6484	-20.1416	-8.54492
18.2	-37.8418	-23.8037	-17.0898	-21.9727	-14.6484	-10.9863	-12.207	-11.5967	-13.4277	-15.2588	-9.76562	-12.8174	-11.5967
18.3	-39.6729	-20.1416	-15.8691	-17.0898	-12.207	-8.54492	-17.7002	-13.4277	-12.8174	-5.49316	-12.207	-14.6484	-12.207
18.4	-37.8418	-27.4658	-14.6484	-18.3105	-15.8691	-2.44141	-9.15527	-18.3105	-11.5967	-10.376	-12.207	-13.4277	-17.0898
18.5	-39.0625	-25.0244	-15.8691	-16.4795	-12.207	-5.49316	-12.207	-7.32422	-16.4795	-13.4277	-12.207	-18.9209	-7.93457
18.6	-36.6211	-29.2969	-17.0898	-15.8691	-13.4277	-9.76562	-15.8691	-15.2588	-9.76562	-14.6484	-13.4277	-11.5967	-12.8174
18.7	-37.2314	-21.3623	-18.3105	-14.6484	-8.54492	-10.9863	-14.0381	-11.5967	-23.1934	-17.0898	-12.8174	-14.6484	-15.2588
18.8	-29.9072	-25.6348	-15.8691	-21.9727	-7.93457	-9.15527	-14.0381	-9.15527	-10.376	-10.9863	-9.15527	-9.15527	-9.76562
18.9	-37.8418	-26.2451	-23.1934	-14.0381	-14.0381	-5.49316	-14.6484	-14.6484	-10.376	-7.32422	-16.4795	-15.8691	-10.376
19	-34.1797	-22.583	-10.9863	-13.4277	-17.0898	-13.4277	-12.8174	-10.9863	-10.9863	-17.0898	-9.15527	-15.8691	-12.207
19.1	-37.2314	-18.3105	-14.6484	-20.1416	-10.9863	-14.0381	-13.4277	-10.376	-12.8174	-10.9863	-13.4277	-15.2588	-14.6484
19.2	-37.8418	-26.2451	-16.4795	-24.4141	-15.8691	-16.4795	-13.4277	-11.5967	-12.8174	-18.3105	-12.8174	-12.8174	-12.207
19.3	-26.8555	-26.8555	-20.752	-17.0898	-12.8174	-7.32422	-23.1934	-14.6484	-10.9863	-10.9863	-8.54492	-18.9209	-12.8174
19.4	-35.4004	-23.8037	-14.6484	-18.3105	-12.8174	-6.10352	-12.207	-14.0381	-14.6484	-9.15527	-8.54492	-15.8691	-13.4277
19.5	-35.4004	-18.9209	-18.3105	-15.8691	-12.8174	-11.5967	-16.4795	-11.5967	-15.8691	-15.8691	-10.376	-12.8174	-16.4795
19.6	-36.6211	-25.0244	-20.752	-20.1416	-14.6484	-7.93457	-15.2588	-13.4277	-8.54492	-17.7002	-15.8691	-16.4795	-12.8174
19.7	-36.0107	-25.0244	-20.752	-22.583	-18.3105	-10.9863	-13.4277	-7.93457	-16.4795	-16.4795	-11.5967	-17.7002	-15.8691
19.8	-35.4004	-23.1934	-18.3105	-17.0898	-11.5967	-11.5967	-11.5967	-14.6484	-12.8174	-9.15527	-14.0381	-13.4277	-9.15527
19.9	-26.8555	-22.583	-22.583	-18.9209	-15.2588	-9.76562	-14.6484	-12.8174	-12.207	-10.9863	-6.71387	-11.5967	-14.0381
20	-38.4521	-21.3623	-14.0381	-15.2588	-18.3105	-9.15527	-14.0381	-12.207	-14.0381	-9.76562	-11.5967	-18.3105	-19.5312
20.1	-31.1279	-20.752	-19.5312	-17.0898	-10.9863	-11.5967	-15.2588	-15.2588	-18.3105	-17.0898	-9.15527	-18.3105	-12.207
20.2	-32.3486	-24.4141	-17.0898	-18.9209	-10.376	-9.76562	-13.4277	-14.6484	-14.6484	-12.8174	-15.8691	-17.7002	-14.0381
20.3	-32.959	-29.2969	-17.7002	-7.93457	-9.15527	-8.54492	-13.4277	-12.207	-15.8691	-13.4277	-9.76562	-15.8691	-10.376
20.4	-39.6729	-22.583	-14.6484	-18.3105	-15.2588	-11.5967	-7.32422	-13.4277	-12.8174	-9.15527	-8.54492	-14.6484	-6.10352
20.5	-40.2832	-25.6348	-17.0898	-15.8691	-16.4795	-12.207	-10.376	-10.9863	-12.8174	-18.3105	-15.8691	-14.6484	-12.207
20.6	-38.4521	-22.583	-18.3105	-14.0381	-13.4277	-16.4795	-13.4277	-10.9863	-14.6484	-10.9863	-8.54492	-17.0898	-12.8174
20.7	-37.2314	-29.2969	-14.0381	-15.8691	-12.8174	-8.54492	-10.376	-21.3623	-13.4277	-15.8691	-5.49316	-14.0381	-16.4795
20.8	-37.8418	-26.8555	-18.3105	-19.5312	-7.93457	-18.3105	-12.207	-12.207	-13.4277	-14.0381	-9.76562	-11.5967	-10.376
20.9	-37.8418	-22.583	-23.1934	-17.0898	-7.93457	-10.9863	-12.207	-10.376	-14.0381	-2.44141	-14.6484	-11.5967	-12.8174
21	-31.1279	-24.4141	-18.3105	-17.7002	-9.15527	-9.76562	-9.76562	-18.3105	-11.5967	-14.6484	-13.4277	-20.752	-12.207
21.1	-30.5176	-28.0762	-17.0898	-17.0898	-9.76562	-2.44141	-13.4277	-10.9863	-15.2588	-7.93457	-10.376	-12.207	-15.8691
21.2	-32.959	-20.1416	-18.9209	-12.8174	-9.15527	-10.376	-20.1416	-10.376	-15.8691	-14.6484	-14.0381	-12.8174	-12.207
21.3	-33.5693	-21.3623	-17.7002	-14.6484	-15.2588	-12.207	-9.15527	-17.0898	-14.6484	-9.15527	-15.8691	-11.5967	-12.8174
21.4	-39.0625	-20.1416	-14.6484	-18.3105	-10.376	-14.6484	-14.0381	-9.15527	-12.8174	-15.8691	-9.76562	-16.4795	-17.7002
21.5	-36.6211	-21.9727	-18.3105	-6.71387	-10.9863	-12.207	-13.4277	-15.2588	-13.4277	-7.32422	-17.0898	-14.6484	-9.76562
21.6	-37.2314	-23.8037	-18.3105	-14.6484	-14.6484	-9.76562	-10.376	-9.15527	-17.7002	-10.9863	-8.54492	-13.4277	-10.376
21.7	-35.4004	-22.583	-16.4795	-14.0381	-17.7002	-12.207	-11.5967	-12.207	-13.4277	-12.207	-10.9863	-18.3105	-9.76562
21.8	-32.959	-21.3623	-21.3623	-9.76562	-12.207	-9.76562	-14.6484	-13.4277	-10.376	-17.7002	-12.207	-20.1416	-7.93457
21.9	-31.1279	-22.583	-19.5312	-13.4277	-13.4277	-13.4277	-9.76562	-11.5967	-15.2588	-14.0381	-11.5967	-12.8174	-13.4277
22	-39.6729	-23.1934	-20.752	-23.1934	-12.8174	-11.5967	-15.2588	-17.0898	-11.5967	-15.2588	-12.8174	-20.1416	-9.76562
22.1	-39.0625	-28.6865	-14.6484	-14.0381	-11.5967	-8.54492	-15.2588	-7.93457	-16.4795	-12.207	-15.2588	-18.9209	-14.0381
22.2	-31.7383	-31.1279	-15.8691	-20.1416	-12.8174	-14.0381	-15.2588	-14.6484	-15.2588	-15.8691	-10.9863	-14.6484	-16.4795
22.3	-37.2314	-18.9209	-20.1416	-17.7002	-13.4277	-10.9863	-10.376	-16.4795	-8.54492	-12.8174	-12.207	-14.6484	-13.4277
22.4	-34.79	-31.7383	-25.0244	-20.752	-9.76562	-4.88281	-17.0898	-10.376	-17.7002	-15.2588	-13.4277	-17.7002	-10.376
22.5	-33.5693	-21.9727	-18.3105	-19.5312	-11.5967	-12.207	-15.8691	-7.32422	-12.8174	-10.376	-14.6484	-17.7002	-10.9863
22.6	-35.4004	-26.8555	-15.2588	-17.0898	-14.0381	-7.93457	-11.5967	-15.2588	-15.2588	-8.54492	-12.207	-3.66211	-12.8174
22.7	-31.7383	-25.6348	-21.9727	-18.3105	-12.207	-10.376	-12.207	-12.207	-16.4795	-8.54492	-10.9863	-9.76562	-10.9863
22.8	-28.6865	-26.8555	-17.0898	-17.0898	-12.207	-9.15527	-13.4277	-12.8174	-13.4277	-10.376	-13.4277	-9.76562	-15.2588
22.9	-39.0625	-23.1934	-17.7002	-18.9209	-11.5967	-11.5967	-11.5967	-10.9863	-12.8174	-14.6484	-10.9863	-18.9209	-13.4277
23	-32.3486	-22.583	-21.9727	-16.4795	-15.8691	-12.8174	-7.93457	-9.15527	-12.207	-15.8691	-9.15527	-14.0381	-14.6484
23.1	-39.0625	-26.2451	-21.3623	-18.3105	-9.76562	-12.207	-9.15527	-12.8174	-9.76562	-14.0381	-11.5967	-16.4795	-10.9863
23.2	-36.0107	-24.4141	-16.4795	-17.0898	-17.0898	-10.376	-17.0898	-8.54492	-15.8691	-18.9209	-13.4277	-18.9209	-10.9863
23.3	-31.1279	-18.9209	-21.9727	-18.3105	-12.207	-12.207	-14.0381	-17.0898	-10.9863	-14.6484	-14.0381	-16.4795	-10.376
23.4	-31.7383	-26.2451	-15.8691	-14.6484	-13.4277	-14.6484	-12.207	-10.9863	-5.49316	-10.376	-11.5967	-18.3105	-10.9863
23.5	-31.1279	-17.7002	-17.0898	-18.3105	-17.0898	-12.207	-10.9863	-16.4795	-18.3105	-12.207	-13.4277	-11.5967	-5.49316
23.6	-31.7383	-25.0244	-15.8691	-18.9209	-12.207	-13.4277	-15.8691	-14.6484	-14.0381	-12.8174	-10.376	-10.376	-8.54492
23.7	-32.959	-21.3623	-15.8691	-19.5312	-14.0381	-10.9863	-9.76562	-8.54492	-11.5967	-17.7002	-14.0381	-13.4277	-12.8174
23.8	-29.2969	-28.0762	-17.0898	-21.3623	-10.9863	-6.71387	-12.8174	-13.4277	-18.3105	-14.6484	-9.15527	-11.5967	-9.76562
23.9	-31.7383	-23.8037	-17.7002	-21.3623	-12.207	-15.8691	-10.376	-12.8174	-15.8691	-17.0898	-13.4277	-18.3105	-18.9209
24	-29.2969	-24.4141	-18.9209	-20.752	-14.0381	-10.376	-9.15527	-10.9863	-15.2588	-11.5967	-10.9863	-15.8691	-10.376
24.1	-32.3486	-25.0244	-17.0898	-14.6484	-14.0381	-11.5967	-9.76562	-9.76562	-11.5967	-9.15527	-13.4277	-12.8174	-12.207
24.2	-32.959	-19.5312	-14.0381	-16.4795	-10.9863	-7.93457	-12.8174	-14.6484	-12.207	-14.6484	-12.207	-14.6484	-10.376
24.3	-34.79	-28.0762	-14.6484	-19.5312	-7.93457	-9.15527	-10.376	-10.9863	-17.0898	-13.4277	-11.5967	-11.5967	-12.8174
24.4	-34.79	-24.4141	-18.3105	-20.1416	-12.207	-10.9863	-14.6484	-14.6484	-15.8691	-12.207	-14.6484	-16.4795	-10.9863
24.5	-28.6865	-21.9727	-12.207	-20.1416	-10.376	-9.76562	-16.4795	-12.8174	-15.8691	-10.9863	-12.8174	-10.376	-11.5967
24.6	-36.6211	-27.4658	-20.752	-17.7002	-13.4277	-12.207	-19.5312	-12.8174	-10.9863	-15.8691	-12.207	-16.4795	-6.10352
24.7	-31.1279	-25.0244	-18.3105	-17.7002	-9.76562	-10.9863	-10.9863	-12.207	-14.6484	-15.2588	-8.54492	-15.2588	-9.76562
24.8	-37.2314	-26.8555	-20.752	-17.0898	-20.752	-9.76562	-14.6484	-14.0381	-17.0898	-14.0381	-8.54492	-7.32422	-13.4277
24.9	-31.7383	-20.1416	-20.1416	-17.0898	-12.207	-11.5967	-12.207	-15.2588	-15.8691	-15.2588	-14.0381	-14.0381	-12.207
25	-32.3486	-24.4141	-14.0381	-17.0898	-8.54492	-9.76562	-13.4277	-11.5967	-14.6484	-13.4277	-9.76562	-17.7002	-19.5312
25.1	-31.7383	-28.0762	-21.3623	-16.4795	-10.376	-15.2588	-10.9863	-10.376	-12.207	-11.5967	-12.207	-18.3105	-13.4277
25.2	-29.2969	-28.6865	-22.583	-10.9863	-9.15527	-10.376	-16.4795	-9.76562	-14.0381	-12.8174	-17.0898	-15.2588	-12.207
25.3	-38.4521	-21.3623	-20.1416	-18.3105	-15.2588	-11.5967	-13.4277	-10.376	-12.8174	-19.5312	-10.9863	-17.0898	-4.27246
25.4	-36.0107	-24.4141	-23.8037	-17.0898	-7.93457	-9.76562	-21.9727	-17.0898	-14.0381	-9.76562	-16.4795	-16.4795	-10.376
25.5	-32.3486	-21.3623	-18.3105	-23.8037	-15.8691	-10.9863	-15.2588	-10.376	-15.8691	-10.9863	-10.376	-15.2588	-10.9863
25.6	-34.79	-23.8037	-20.1416	-22.583	-10.376	-19.5312	-9.76562	-12.207	-14.6484	-14.0381	-12.207	-6.71387	-7.32422
25.7	-31.7383	-20.752	-16.4795	-17.0898	-15.8691	-16.4795	-17.7002	-12.207	-10.9863	-10.9863	-6.10352	-14.6484	-14.0381
25.8	-28.0762	-22.583	-18.9209	-16.4795	-9.76562	-10.9863	-16.4795	-8.54492	-20.1416	-11.5967	-17.7002	-12.207	-8.54492
25.9	-31.7383	-31.1279	-15.8691	-15.2588	-6.71387	-13.4277	-8.54492	-9.15527	-11.5967	-10.376	-14.0381	-17.0898	-15.8691
26	-31.7383	-20.1416	-14.6484	-15.8691	-17.7002	-10.9863	-12.207	-7.93457	-18.9209	-11.5967	-14.6484	-20.1416	-10.9863
26.1	-34.79	-15.8691	-17.0898	-23.1934	-8.54492	-14.0381	-9.76562	-14.0381	-14.6484	-14.6484	-12.207	-13.4277	-12.8174
26.2	-34.79	-23.8037	-19.5312	-16.4795	-14.6484	-15.8691	-9.76562	-15.2588	-12.8174	-12.8174	-10.9863	-11.5967	-9.15527
26.3	-28.0762	-24.4141	-15.8691	-17.7002	-13.4277	-15.8691	-18.3105	-10.9863	-15.2588	-8.54492	-10.9863	-23.8037	-15.2588
26.4	-31.7383	-22.583	-20.752	-15.8691	-12.8174	-10.376	-10.376	-18.9209	-14.0381	-12.207	-12.207	-13.4277	-12.207
26.5	-36.0107	-25.0244	-21.9727	-15.2588	-14.0381	-10.9863	-14.0381	-8.54492	-10.9863	-9.15527	-9.15527	-11.5967	-3.66211
26.6	-30.5176	-25.6348	-18.3105	-15.8691	-14.6484	-10.9863	-15.2588	-14.6484	-15.8691	-17.0898	-17.7002	-13.4277	-12.8174
26.7	-32.3486	-24.4141	-13.4277	-11.5967	-9.76562	-10.9863	-11.5967	-10.9863	-13.4277	-17.0898	-12.8174	-12.8174	-9.15527
26.8	-35.4004	-20.752	-19.5312	-17.7002	-7.32422	-10.9863	-15.2588	-15.8691	-15.8691	-10.9863	-12.207	-14.0381	-14.0381
26.9	-39.0625	-23.1934	-16.4795	-14.0381	-12.207	-6.10352	-13.4277	-12.8174	-17.0898	-9.76562	-11.5967	-13.4277	-13.4277
27	-31.1279	-25.6348	-19.5312	-17.7002	-9.76562	-14.6484	-14.6484	-8.54492	-14.6484	-11.5967	-10.376	-11.5967	-13.4277
27.1	-28.6865	-25.0244	-15.8691	-14.6484	-12.8174	-17.0898	-12.207	-15.2588	-10.9863	-9.15527	-15.8691	-15.2588	-9.76562
27.2	-38.4521	-32.959	-15.2588	-9.76562	-14.0381	-10.9863	-11.5967	-9.15527	-18.9209	-15.2588	-10.376	-15.2588	-13.4277
27.3	-31.7383	-25.0244	-17.0898	-17.0898	-13.4277	-13.4277	-13.4277	-9.76562	-9.76562	-13.4277	-12.8174	-14.0381	-10.376
27.4	-38.4521	-29.2969	-18.3105	-18.3105	-14.0381	-6.10352	-8.54492	-12.207	-15.2588	-15.8691	-16.4795	-10.9863	-9.15527
27.5	-35.4004	-21.3623	-22.583	-15.8691	-6.10352	-19.5312	-9.76562	-9.76562	-12.207	-14.6484	-9.15527	-15.2588	-11.5967
27.6	-40.2832	-21.3623	-20.752	-12.8174	-13.4277	-6.10352	-17.0898	-14.0381	-15.8691	-12.207	-16.4795	-14.0381	-13.4277
27.7	-36.6211	-15.8691	-18.9209	-13.4277	-16.4795	-14.0381	-14.6484	-10.9863	-14.6484	-15.8691	-14.6484	-11.5967	-19.5312
27.8	-32.3486	-26.8555	-15.8691	-14.0381	-7.32422	-12.8174	-9.15527	-10.376	-10.9863	-13.4277	-13.4277	-17.7002	-14.6484
27.9	-36.0107	-16.4795	-14.6484	-12.207	-8.54492	-7.32422	-17.0898	-12.8174	-11.5967	-18.3105	-12.8174	-10.9863	-6.71387
28	-34.1797	-27.4658	-18.9209	-17.7002	-7.32422	-6.71387	-7.93457	-13.4277	-14.6484	-17.7002	-9.15527	-13.4277	-6.71387
28.1	-37.8418	-24.4141	-21.9727	-12.207	-12.207	-14.0381	-14.0381	-10.376	-18.3105	-13.4277	-12.8174	-12.8174	-10.9863
28.2	-36.0107	-24.4141	-21.3623	-16.4795	-10.9863	-9.15527	-13.4277	-11.5967	-17.7002	-13.4277	-15.8691	-10.376	-14.6484
28.3	-34.1797	-25.0244	-17.0898	-12.8174	-9.15527	-10.376	-10.376	-15.2588	-17.7002	-16.4795	-9.15527	-15.8691	-10.376
28.4	-32.3486	-22.583	-15.8691	-14.0381	-15.2588	-6.71387	-9.15527	-10.9863	-14.0381	-18.3105	-9.15527	-12.207	-17.7002
28.5	-34.1797	-24.4141	-14.6484	-14.6484	-10.9863	-9.15527	-9.15527	-11.5967	-14.6484	-10.376	-7.32422	-14.6484	-15.8691
28.6	-36.0107	-25.6348	-16.4795	-17.0898	-11.5967	-15.2588	-14.6484	-11.5967	-16.4795	-12.207	-12.207	-10.376	-12.207
28.7	-37.8418	-21.3623	-20.1416	-20.752	-14.0381	-12.207	-12.207	-13.4277	-9.15527	-15.8691	-14.0381	-17.0898	-9.15527
28.8	-37.2314	-28.0762	-18.3105	-15.8691	-11.5967	-14.0381	-10.376	-9.76562	-10.9863	-12.8174	-10.9863	-15.8691	-2.44141
28.9	-32.959	-22.583	-17.7002	-14.6484	-8.54492	-8.54492	-15.2588	-11.5967	-12.8174	-20.1416	-14.6484	-10.376	-15.8691
29	-37.2314	-21.9727	-14.6484	-11.5967	-16.4795	-8.54492	-8.54492	-15.8691	-16.4795	-15.2588	-7.32422	-14.6484	-10.376
29.1	-37.8418	-18.9209	-15.8691	-15.2588	-12.207	-10.9863	-11.5967	-10.376	-18.3105	-17.7002	-9.15527	-15.2588	-12.207
29.2	-32.959	-20.752	-18.9209	-13.4277	-15.2588	-12.8174	-11.5967	-8.54492	-15.8691	-9.76562	-15.8691	-15.8691	-12.8174
29.3	-31.1279	-23.1934	-12.8174	-12.8174	-6.10352	-13.4277	-15.2588	-12.8174	-13.4277	-19.5312	-9.15527	-15.8691	-12.8174
29.4	-31.7383	-20.1416	-17.7002	-14.0381	-12.207	-11.5967	-15.8691	-14.0381	-14.6484	-17.7002	-9.76562	-14.6484	-12.207
29.5	-28.6865	-23.1934	-22.583	-17.0898	-11.5967	-9.76562	-11.5967	-12.207	-10.376	-16.4795	-15.8691	-17.7002	-11.5967
29.6	-30.5176	-15.2588	-15.8691	-14.0381	-9.76562	-10.9863	-5.49316	-14.0381	-12.207	-18.3105	-9.15527	-7.93457	-13.4277
29.7	-34.79	-21.3623	-18.9209	-20.752	-11.5967	-11.5967	-12.207	-9.76562	-12.8174	-10.9863	-10.376	-12.8174	-10.376
29.8	-29.9072	-23.1934	-18.3105	-18.3105	-9.76562	-7.32422	-10.376	-9.15527	-17.0898	-11.5967	-14.0381	-12.207	-14.6484
29.9	-39.0625	-20.752	-17.0898	-12.207	-17.7002	-15.2588	-11.5967	-14.6484	-17.7002	-10.376	-10.376	-13.4277	-13.4277
30	-31.7383	-23.8037	-21.3623	-12.207	-12.207	-6.10352	-12.8174	-12.8174	-12.207	-11.5967	-10.9863	-7.32422	-14.6484
30.1	-37.8418	-24.4141	-12.8174	-16.4795	-9.15527	-11.5967	-14.0381	-13.4277	-14.6484	-23.1934	-11.5967	-14.6484	-9.76562
30.2	-35.4004	-25.0244	-11.5967	-15.8691	-15.2588	-9.76562	-15.8691	-12.207	-16.4795	-18.3105	-12.207	-15.2588	-9.76562
30.3	-32.959	-21.9727	-19.5312	-19.5312	-10.376	-7.93457	-10.9863	-3.66211	-15.2588	-13.4277	-16.4795	-15.8691	-10.9863
30.4	-27.4658	-26.2451	-21.9727	-16.4795	-9.76562	-7.93457	-17.0898	-14.0381	-16.4795	-15.8691	-10.9863	-12.8174	-14.6484
30.5	-38.4521	-23.8037	-11.5967	-20.1416	-15.2588	-14.6484	-14.6484	-15.8691	-13.4277	-12.207	-11.5967	-12.8174	-9.15527
30.6	-29.9072	-26.2451	-19.5312	-17.7002	-14.0381	-17.0898	-15.2588	-10.9863	-19.5312	-15.8691	-7.32422	-17.0898	-9.15527
30.7	-32.3486	-20.752	-14.0381	-17.0898	-15.8691	-6.10352	-11.5967	-13.4277	-14.0381	-14.0381	-12.207	-11.5967	-12.207
30.8	-32.3486	-20.1416	-19.5312	-15.2588	-13.4277	-17.7002	-14.0381	-18.3105	-16.4795	-9.76562	-12.8174	-14.6484	-13.4277
30.9	-38.4521	-26.8555	-17.0898	-18.3105	-14.0381	-12.8174	-9.15527	-7.32422	-12.8174	-9.76562	-14.0381	-12.207	-12.207
31	-32.959	-23.1934	-13.4277	-18.3105	-9.76562	-8.54492	-10.9863	-13.4277	-11.5967	-11.5967	-13.4277	-13.4277	-14.6484
31.1	-30.5176	-23.8037	-16.4795	-21.9727	-7.32422	-10.376	-12.8174	-10.9863	-14.6484	-11.5967	-13.4277	-17.7002	-12.207
31.2	-31.7383	-21.9727	-16.4795	-23.1934	-10.376	-10.376	-15.2588	-14.6484	-21.3623	-17.7002	-10.376	-7.93457	-10.9863
31.3	-37.2314	-26.8555	-18.3105	-19.5312	-10.9863	-17.0898	-15.8691	-12.8174	-12.207	-14.6484	-10.9863	-12.8174	-14.6484
31.4	-37.8418	-25.6348	-21.3623	-19.5312	-19.5312	-7.93457	-8.54492	-16.4795	-15.8691	-13.4277	-8.54492	-7.93457	-9.15527
31.5	-37.2314	-25.0244	-20.1416	-17.7002	-10.9863	-7.93457	-7.32422	-11.5967	-14.0381	-10.9863	-12.8174	-14.0381	-9.15527
31.6	-31.7383	-23.1934	-20.1416	-15.2588	-6.71387	-17.0898	-14.6484	-12.8174	-18.3105	-16.4795	-14.6484	-13.4277	-12.207
31.7	-36.6211	-26.8555	-19.5312	-12.207	-13.4277	-7.93457	-13.4277	-10.9863	-19.5312	-17.0898	-7.93457	-10.9863	-7.93457
31.8	-33.5693	-26.8555	-15.2588	-13.4277	-17.0898	-12.8174	-12.207	-9.76562	-15.8691	-16.4795	-13.4277	-15.8691	-9.15527
31.9	-32.3486	-23.1934	-18.9209	-14.0381	-17.0898	-10.9863	-8.54492	-11.5967	-19.5312	-7.93457	-14.6484	-14.6484	-17.0898
32	-36.6211	-23.8037	-14.6484	-18.9209	-18.9209	-10.376	-11.5967	-15.2588	-12.8174	-9.76562	-6.71387	-14.6484	-11.5967
32.1	-34.79	-28.6865	-15.8691	-17.7002	-14.6484	-13.4277	-13.4277	-12.207	-15.8691	-17.7002	-15.8691	-10.376	-13.4277
32.2	-28.0762	-22.583	-11.5967	-23.1934	-11.5967	-16.4795	-17.0898	-10.9863	-10.9863	-18.3105	-15.2588	-10.9863	-11.5967
32.3	-36.0107	-26.2451	-15.8691	-14.0381	-9.76562	-14.0381	-14.6484	-8.54492	-12.8174	-13.4277	-14.6484	-15.2588	-14.6484
32.4	-34.1797	-23.1934	-15.2588	-16.4795	-12.207	-12.8174	-12.8174	-10.376	-17.0898	-14.0381	-9.76562	-12.8174	-12.8174
32.5	-33.5693	-23.1934	-16.4795	-19.5312	-12.207	-8.54492	-14.0381	-15.8691	-10.9863	-15.8691	-14.0381	-14.0381	-10.9863
32.6	-36.6211	-14.6484	-14.6484	-16.4795	-13.4277	-10.376	-8.54492	-11.5967	-15.2588	-12.207	-10.376	-11.5967	-9.76562
32.7	-39.6729	-25.0244	-16.4795	-20.1416	-14.0381	-5.49316	-13.4277	-13.4277	-19.5312	-15.8691	-3.66211	-15.2588	-15.8691
32.8	-29.9072	-26.2451	-13.4277	-15.2588	-9.76562	-15.8691	-8.54492	-9.76562	-17.0898	-14.0381	-14.6484	-12.207	-9.15527
32.9	-34.1797	-24.4141	-18.9209	-14.6484	-13.4277	-5.49316	-10.9863	-14.0381	-14.6484	-10.376	-15.8691	-13.4277	-14.6484
33	-31.7383	-28.0762	-14.6484	-15.8691	-15.2588	-4.27246	-9.76562	-9.76562	-19.5312	-15.8691	-8.54492	-7.32422	-11.5967
33.1	-32.3486	-22.583	-15.8691	-10.376	-12.207	-12.8174	-15.2588	-15.8691	-17.0898	-20.752	-13.4277	-15.2588	-14.0381
33.2	-34.1797	-24.4141	-11.5967	-19.5312	-10.376	-10.9863	-11.5967	-16.4795	-14.6484	-9.76562	-9.15527	-14.0381	-15.8691
33.3	-30.5176	-24.4141	-11.5967	-18.3105	-17.7002	-10.9863	-5.49316	-10.376	-14.0381	-14.6484	-10.9863	-10.376	-18.9209
33.4	-36.0107	-20.1416	-18.3105	-14.6484	-6.10352	-12.207	-13.4277	-12.207	-14.0381	-11.5967	-13.4277	-18.3105	-10.9863
33.5	-31.7383	-23.8037	-13.4277	-16.4795	-15.2588	-8.54492	-9.76562	-13.4277	-15.8691	-15.2588	-10.376	-16.4795	-12.8174
33.6	-37.8418	-23.8037	-20.752	-18.9209	-10.9863	-12.8174	-8.54492	-7.93457	-12.8174	-17.0898	-14.6484	-10.376	-9.15527
33.7	-28.6865	-23.8037	-17.7002	-17.7002	-10.9863	-6.10352	-14.6484	-12.8174	-16.4795	-14.6484	-12.8174	-12.8174	-12.207
33.8	-31.7383	-25.0244	-15.2588	-14.6484	-11.5967	-11.5967	-12.207	-6.10352	-13.4277	-9.15527	-7.93457	-15.2588	-7.93457
33.9	-34.79	-21.9727	-15.8691	-14.0381	-13.4277	-7.93457	-7.93457	-13.4277	-14.6484	-10.9863	-12.207	-15.8691	-20.1416
34	-34.1797	-21.9727	-18.9209	-23.1934	-9.76562	-13.4277	-12.8174	-15.8691	-18.9209	-17.7002	-13.4277	-13.4277	-12.8174
34.1	-27.4658	-26.8555	-13.4277	-17.7002	-5.49316	-9.15527	-10.376	-12.207	-22.583	-13.4277	-12.8174	-17.0898	-12.207
34.2	-34.1797	-27.4658	-13.4277	-14.0381	-13.4277	-7.93457	-9.76562	-13.4277	-14.6484	-4.88281	-14.6484	-13.4277	-9.76562
34.3	-29.9072	-29.9072	-15.2588	-20.752	-14.0381	-9.15527	-6.10352	-14.6484	-14.6484	-16.4795	-15.8691	-10.9863	-14.6484
34.4	-31.7383	-24.4141	-14.0381	-18.3105	-9.76562	-7.32422	-9.76562	-14.6484	-16.4795	-11.5967	-8.54492	-12.207	-15.2588
34.5	-32.3486	-20.1416	-18.3105	-15.2588	-8.54492	-12.207	-16.4795	-15.8691	-17.0898	-15.8691	-11.5967	-10.9863	-12.207
34.6	-28.0762	-26.2451	-15.2588	-18.9209	-8.54492	-9.76562	-10.9863	-14.6484	-13.4277	-12.8174	-10.9863	-14.6484	-12.8174
34.7	-36.0107	-21.9727	-16.4795	-17.7002	-12.8174	-9.15527	-12.8174	-10.9863	-20.1416	-11.5967	-9.76562	-10.376	-10.9863
34.8	-36.6211	-20.752	-15.8691	-17.0898	-11.5967	-7.93457	-10.376	-13.4277	-17.0898	-15.2588	-17.0898	-14.6484	-11.5967
34.9	-31.1279	-26.8555	-18.3105	-16.4795	-14.6484	-8.54492	-11.5967	-13.4277	-18.3105	-15.8691	-9.15527	-12.207	-12.8174
35	-29.9072	-26.8555	-15.2588	-18.3105	-10.9863	-7.93457	-19.5312	-13.4277	-21.9727	-15.2588	-16.4795	-18.3105	-15.8691
35.1	-30.5176	-22.583	-20.1416	-21.3623	-15.2588	-10.376	-14.6484	-13.4277	-10.9863	-17.0898	-8.54492	-13.4277	-16.4795
35.2	-31.1279	-23.1934	-22.583	-18.3105	-17.0898	-6.10352	-12.207	-10.9863	-11.5967	-13.4277	-13.4277	-10.9863	-10.9863
35.3	-32.3486	-21.3623	-12.207	-17.0898	-10.9863	-10.376	-15.2588	-11.5967	-11.5967	-12.8174	-12.207	-17.7002	-17.0898
35.4	-30.5176	-21.3623	-15.8691	-20.1416	-16.4795	-13.4277	-14.6484	-14.6484	-19.5312	-12.207	-12.207	-15.8691	-17.7002
35.5	-38.4521	-18.9209	-15.2588	-14.0381	-15.2588	-7.93457	-11.5967	-12.207	-15.2588	-18.3105	-9.76562	-11.5967	-12.8174
35.6	-31.7383	-28.6865	-14.0381	-21.9727	-10.9863	-10.9863	-11.5967	-15.2588	-11.5967	-17.7002	-9.76562	-16.4795	-12.8174
35.7	-26.2451	-26.2451	-16.4795	-18.9209	-15.2588	-9.15527	-12.207	-13.4277	-14.0381	-10.9863	-10.376	-7.32422	-11.5967
35.8	-32.3486	-34.79	-15.8691	-18.9209	-12.207	-9.76562	-11.5967	-9.76562	-15.2588	-19.5312	-10.9863	-15.2588	-8.54492
35.9	-38.4521	-26.2451	-16.4795	-18.9209	-9.15527	-13.4277	-10.376	-12.8174	-14.6484	-14.6484	-13.4277	-15.8691	-7.93457
36	-34.1797	-21.3623	-14.0381	-18.9209	-17.0898	-8.54492	-10.9863	-15.2588	-14.0381	-12.207	-11.5967	-17.0898	-9.76562
36.1	-36.0107	-26.8555	-14.6484	-15.8691	-12.8174	-10.376	-12.8174	-10.9863	-14.6484	-14.0381	-13.4277	-11.5967	-6.10352
36.2	-39.6729	-24.4141	-15.2588	-17.0898	-12.207	-9.15527	-15.2588	-17.0898	-12.8174	-12.8174	-7.93457	-9.15527	-18.9209
36.3	-26.2451	-27.4658	-15.2588	-16.4795	-8.54492	-14.6484	-11.5967	-15.8691	-18.9209	-11.5967	-11.5967	-12.8174	-14.0381
36.4	-29.2969	-27.4658	-15.8691	-18.3105	-10.9863	-7.93457	-14.6484	-11.5967	-12.8174	-19.5312	-15.8691	-12.207	-7.93457
36.5	-38.4521	-23.1934	-20.1416	-14.0381	-10.9863	-10.376	-7.93457	-10.9863	-12.8174	-14.6484	-11.5967	-17.0898	-10.9863
36.6	-35.4004	-21.9727	-18.9209	-15.8691	-14.6484	-12.207	-12.207	-9.15527	-15.8691	-14.0381	-8.54492	-16.4795	-7.93457
36.7	-28.0762	-26.8555	-14.0381	-17.7002	-14.0381	-12.207	-14.6484	-10.9863	-18.3105	-14.0381	-10.9863	-15.2588	-14.6484
36.8	-32.959	-23.1934	-18.3105	-16.4795	-13.4277	-17.0898	-14.6484	-12.207	-16.4795	-12.8174	-14.6484	-15.8691	-12.8174
36.9	-32.3486	-25.6348	-20.1416	-25.0244	-14.0381	-8.54492	-14.0381	-17.0898	-13.4277	-13.4277	-7.32422	-12.8174	-10.9863
37	-36.0107	-28.6865	-14.0381	-18.3105	-9.15527	-9.15527	-12.8174	-8.54492	-12.207	-16.4795	-15.8691	-9.15527	-15.2588
37.1	-33.5693	-23.1934	-17.7002	-15.2588	-14.0381	-5.49316	-20.752	-8.54492	-10.376	-14.6484	-9.76562	-17.7002	-12.207
37.2	-35.4004	-25.0244	-19.5312	-18.3105	-13.4277	-8.54492	-8.54492	-13.4277	-12.8174	-11.5967	-12.207	-13.4277	-13.4277
37.3	-42.1143	-22.583	-19.5312	-18.3105	-15.2588	-11.5967	-17.0898	-20.1416	-9.15527	-12.207	-10.376	-17.0898	-12.8174
37.4	-35.4004	-15.8691	-17.0898	-20.752	-10.9863	-13.4277	-11.5967	-7.93457	-15.8691	-14.0381	-10.9863	-17.0898	-8.54492
37.5	-36.0107	-26.2451	-24.4141	-18.9209	-10.376	-8.54492	-17.7002	-5.49316	-12.8174	-15.2588	-12.207	-13.4277	-13.4277
37.6	-34.1797	-23.8037	-14.6484	-21.9727	-13.4277	-15.2588	-10.9863	-12.8174	-12.207	-15.2588	-11.5967	-10.9863	-10.9863
37.7	-34.79	-27.4658	-10.376	-21.9727	-10.9863	-10.9863	-15.2588	-10.9863	-18.9209	-14.0381	-12.207	-14.6484	-12.8174
37.8	-38.4521	-32.3486	-17.0898	-14.6484	-8.54492	-16.4795	-15.8691	-11.5967	-14.6484	-12.207	-14.0381	-15.2588	-12.207
37.9	-37.8418	-26.8555	-20.752	-23.1934	-9.15527	-11.5967	-10.376	-12.207	-14.6484	-14.0381	-13.4277	-17.0898	-10.9863
38	-43.9453	-25.6348	-22.583	-22.583	-9.76562	-17.0898	-15.2588	-9.76562	-12.207	-10.376	-7.32422	-15.2588	-15.2588
38.1	-35.4004	-20.752	-15.2588	-16.4795	-11.5967	-4.27246	-12.207	-10.9863	-15.2588	-14.0381	-10.376	-18.3105	-12.8174
38.2	-28.6865	-19.5312	-21.3623	-18.3105	-11.5967	-13.4277	-9.76562	-9.15527	-10.376	-14.0381	-16.4795	-21.9727	-9.76562
38.3	-29.9072	-21.9727	-19.5312	-15.2588	-14.6484	-12.8174	-14.6484	-8.54492	-12.8174	-17.7002	-8.54492	-11.5967	-12.207
38.4	-39.0625	-23.8037	-12.207	-22.583	-9.76562	-12.207	-9.76562	-10.9863	-15.2588	-12.207	-12.207	-18.9209	-11.5967
38.5	-37.2314	-25.0244	-8.54492	-17.0898	-7.32422	-12.207	-11.5967	-10.9863	-17.7002	-15.2588	-7.93457	-9.76562	-10.9863
38.6	-37.2314	-23.1934	-16.4795	-19.5312	-7.32422	-9.15527	-14.6484	-17.0898	-11.5967	-13.4277	-12.8174	-7.93457	-11.5967
38.7	-36.6211	-26.8555	-19.5312	-10.376	-9.76562	-11.5967	-17.0898	-12.207	-11.5967	-9.76562	-11.5967	-10.376	-14.0381
38.8	-33.5693	-20.1416	-18.9209	-16.4795	-13.4277	-18.3105	-10.376	-15.2588	-8.54492	-12.8174	-8.54492	-10.9863	-16.4795
38.9	-32.959	-26.8555	-15.8691	-12.207	-10.376	-6.10352	-15.2588	-8.54492	-12.8174	-17.7002	-13.4277	-14.0381	-7.93457
39	-36.6211	-22.583	-15.2588	-16.4795	-7.93457	-12.8174	-13.4277	-12.8174	-13.4277	-15.2588	-12.8174	-17.7002	-9.76562
39.1	-43.335	-20.752	-15.8691	-20.752	-11.5967	-9.15527	-9.76562	-15.2588	-15.2588	-12.207	-12.207	-15.2588	-15.2588
39.2	-37.2314	-23.1934	-17.0898	-15.2588	-9.15527	-9.15527	-10.9863	-9.76562	-17.0898	-13.4277	-13.4277	-14.6484	-14.0381
39.3	-37.2314	-18.3105	-15.2588	-15.2588	-8.54492	-12.8174	-14.0381	-13.4277	-18.9209	-12.207	-12.8174	-17.0898	-14.0381
39.4	-37.8418	-20.1416	-15.8691	-14.0381	-9.15527	-10.9863	-17.0898	-17.7002	-23.1934	-18.3105	-13.4277	-10.9863	-10.9863
39.5	-36.6211	-19.5312	-16.4795	-17.7002	-15.8691	-11.5967	-12.8174	-11.5967	-19.5312	-13.4277	-8.54492	-21.3623	-8.54492
39.6	-34.1797	-22.583	-20.1416	-15.8691	-9.15527	-10.9863	-11.5967	-8.54492	-9.15527	-10.376	-9.76562	-17.0898	-14.6484
39.7	-36.0107	-25.0244	-17.7002	-17.7002	-9.15527	-17.7002	-13.4277	-9.76562	-12.207	-10.9863	-10.9863	-19.5312	-9.76562
39.8	-39.0625	-28.6865	-19.5312	-18.9209	-7.93457	-18.3105	-14.6484	-16.4795	-21.3623	-8.54492	-10.9863	-12.8174	-17.7002
39.9	-37.8418	-25.6348	-17.0898	-21.9727	-9.15527	-17.0898	-17.0898	-14.6484	-13.4277	-19.5312	-10.9863	-11.5967	-9.15527
40	-29.2969	-29.2969	-17.0898	-15.8691	-14.6484	-10.9863	-13.4277	-15.2588	-9.15527	-10.376	-15.2588	-9.15527	-10.376
40.1	-45.166	-28.0762	-14.0381	-13.4277	-6.10352	-14.0381	-14.6484	-17.0898	-6.71387	-14.0381	-7.32422	-15.2588	-12.8174
40.2	-33.5693	-33.5693	-17.0898	-22.583	-6.71387	-6.71387	-14.6484	-7.93457	-12.8174	-13.4277	-15.8691	-10.376	-9.15527
40.3	-28.0762	-21.9727	-16.4795	-15.8691	-14.0381	-11.5967	-10.9863	-9.76562	-9.76562	-8.54492	-11.5967	-14.0381	-10.9863
40.4	-38.4521	-21.3623	-21.3623	-15.2588	-9.76562	-10.9863	-14.0381	-10.9863	-11.5967	-8.54492	-14.6484	-15.8691	-12.8174
40.5	-41.5039	-31.1279	-18.3105	-17.0898	-5.49316	-15.8691	-14.6484	-12.207	-12.8174	-14.0381	-11.5967	-15.2588	-7.32422
40.6	-42.1143	-26.8555	-15.2588	-17.7002	-12.8174	-11.5967	-7.93457	-9.76562	-17.0898	-14.0381	-10.9863	-15.2588	-13.4277
40.7	-31.7383	-28.6865	-16.4795	-17.7002	-13.4277	-14.6484	-15.8691	-14.0381	-15.2588	-14.0381	-8.54492	-12.8174	-17.7002
40.8	-36.0107	-27.4658	-17.0898	-17.0898	-10.9863	-12.207	-15.2588	-15.2588	-11.5967	-10.376	-14.0381	-12.8174	-10.376
40.9	-36.0107	-27.4658	-17.0898	-12.207	-18.3105	-11.5967	-10.376	-15.2588	-10.376	-12.8174	-13.4277	-19.5312	-10.376
41	-34.79	-24.4141	-16.4795	-16.4795	-10.376	-12.207	-12.207	-9.15527	-10.9863	-13.4277	-10.9863	-15.2588	-8.54492
41.1	-40.8936	-25.0244	-17.0898	-12.207	-6.71387	-8.54492	-14.6484	-15.8691	-16.4795	-6.10352	-17.7002	-16.4795	-16.4795
41.2	-34.1797	-25.6348	-19.5312	-11.5967	-12.207	-8.54492	-14.6484	-12.8174	-14.6484	-12.8174	-16.4795	-16.4795	-9.76562
41.3	-32.959	-28.0762	-12.8174	-21.3623	-11.5967	-9.76562	-15.8691	-13.4277	-17.7002	-14.6484	-12.207	-13.4277	-9.76562
41.4	-34.79	-17.0898	-21.3623	-17.0898	-7.32422	-12.207	-14.6484	-4.27246	-15.8691	-14.0381	-12.8174	-13.4277	-10.9863
41.5	-33.5693	-25.6348	-18.9209	-15.8691	-7.93457	-17.7002	-14.6484	-11.5967	-10.376	-7.93457	-17.0898	-7.93457	-9.15527
41.6	-34.79	-25.6348	-23.1934	-20.1416	-9.76562	-7.93457	-14.6484	-15.8691	-20.752	-15.2588	-12.207	-15.8691	-11.5967
41.7	-31.7383	-31.1279	-20.752	-14.6484	-14.6484	-4.27246	-12.207	-17.7002	-10.376	-21.3623	-15.8691	-14.0381	-10.9863
41.8	-33.5693	-23.1934	-16.4795	-16.4795	-10.376	-15.2588	-17.0898	-13.4277	-15.2588	-10.9863	-9.15527	-12.207	-10.9863
41.9	-26.2451	-26.8555	-19.5312	-21.3623	-12.8174	-12.207	-11.5967	-15.8691	-12.207	-10.9863	-14.0381	-17.7002	-11.5967
42	-35.4004	-25.6348	-18.3105	-18.9209	-8.54492	-9.76562	-15.2588	-4.88281	-18.3105	-14.6484	-14.6484	-15.2588	-12.8174
42.1	-39.6729	-26.8555	-11.5967	-15.8691	-10.9863	-12.8174	-14.0381	-12.207	-12.207	-10.376	-13.4277	-8.54492	-6.71387
42.2	-34.1797	-26.8555	-15.8691	-20.1416	-17.0898	-8.54492	-6.10352	-13.4277	-15.8691	-12.8174	-15.2588	-10.9863	-11.5967
42.3	-36.0107	-20.752	-15.2588	-15.8691	-10.9863	-4.27246	-14.0381	-6.10352	-8.54492	-14.0381	-13.4277	-11.5967	-15.2588
42.4	-33.5693	-28.6865	-18.3105	-15.8691	-8.54492	-11.5967	-17.0898	-15.2588	-15.2588	-10.9863	-9.15527	-15.8691	-11.5967
42.5	-37.8418	-26.8555	-17.0898	-14.6484	-9.76562	-10.376	-12.8174	-14.6484	-19.5312	-14.6484	-12.207	-14.0381	-10.9863
42.6	-27.4658	-28.0762	-18.9209	-21.9727	-12.8174	-13.4277	-14.0381	-12.8174	-7.93457	-17.0898	-15.2588	-15.8691	-13.4277
42.7	-36.6211	-26.2451	-21.9727	-20.1416	-16.4795	-10.9863	-15.2588	-11.5967	-11.5967	-15.8691	-7.32422	-11.5967	-19.5312
42.8	-38.4521	-23.1934	-13.4277	-16.4795	-7.32422	-9.76562	-11.5967	-15.2588	-15.2588	-11.5967	-16.4795	-20.1416	-12.207
42.9	-34.1797	-23.8037	-19.5312	-14.6484	-10.376	-17.0898	-12.8174	-7.32422	-11.5967	-7.32422	-11.5967	-12.207	-9.15527
43	-32.3486	-24.4141	-13.4277	-12.8174	-9.76562	-12.8174	-15.2588	-15.8691	-10.9863	-16.4795	-18.3105	-18.3105	-12.8174
43.1	-34.1797	-23.1934	-23.1934	-19.5312	-15.2588	-14.0381	-15.8691	-10.9863	-18.9209	-15.2588	-14.6484	-9.15527	-7.32422
43.2	-36.0107	-23.1934	-13.4277	-20.1416	-12.207	-10.9863	-12.8174	-12.8174	-14.6484	-12.8174	-9.76562	-16.4795	-12.8174
43.3	-40.2832	-27.4658	-14.6484	-19.5312	-11.5967	-12.207	-15.8691	-10.9863	-17.0898	-11.5967	-11.5967	-8.54492	-13.4277
43.4	-35.4004	-22.583	-17.7002	-16.4795	-11.5967	-10.9863	-15.2588	-14.0381	-14.6484	-14.6484	-17.0898	-15.2588	-12.8174
43.5	-29.2969	-30.5176	-25.6348	-9.15527	-6.10352	-18.3105	-9.15527	-10.376	-17.0898	-14.6484	-7.32422	-14.0381	-8.54492
43.6	-33.5693	-26.2451	-17.0898	-17.0898	-12.207	-17.7002	-10.376	-14.0381	-10.9863	-9.76562	-8.54492	-12.8174	-8.54492
43.7	-24.4141	-31.7383	-17.7002	-15.8691	-12.8174	-13.4277	-9.76562	-12.8174	-12.8174	-13.4277	-14.0381	-14.0381	-9.15527
43.8	-34.79	-28.0762	-14.6484	-10.9863	-7.32422	-15.2588	-13.4277	-10.9863	-9.76562	-10.9863	-14.0381	-17.0898	-10.376
43.9	-32.3486	-21.3623	-9.76562	-19.5312	-8.54492	-9.76562	-13.4277	-9.76562	-15.2588	-16.4795	-14.6484	-14.6484	-9.76562
44	-29.9072	-25.0244	-18.3105	-14.6484	-10.376	-13.4277	-13.4277	-15.2588	-12.8174	-14.6484	-9.76562	-13.4277	-15.8691
44.1	-35.4004	-26.2451	-14.0381	-14.6484	-11.5967	-10.376	-14.6484	-18.3105	-8.54492	-7.93457	-10.9863	-11.5967	-12.8174
44.2	-36.0107	-26.8555	-20.752	-11.5967	-14.0381	-11.5967	-13.4277	-9.76562	-11.5967	-17.7002	-7.93457	-10.376	-7.93457
44.3	-36.6211	-25.0244	-14.0381	-10.376	-10.9863	-13.4277	-15.2588	-15.2588	-13.4277	-12.207	-14.6484	-9.15527	-10.9863
44.4	-35.4004	-23.1934	-19.5312	-16.4795	-14.0381	-17.0898	-12.207	-10.9863	-15.8691	-11.5967	-12.8174	-17.0898	-13.4277
44.5	-37.8418	-20.752	-12.207	-19.5312	-12.207	-8.54492	-17.0898	-7.93457	-12.8174	-11.5967	-14.6484	-9.76562	-14.6484
44.6	-36.6211	-25.0244	-18.9209	-14.6484	-14.6484	-10.376	-15.8691	-14.6484	-13.4277	-15.8691	-10.9863	-17.0898	-13.4277
44.7	-30.5176	-20.752	-20.1416	-17.0898	-12.207	-13.4277	-11.5967	-9.76562	-11.5967	-12.207	-14.0381	-10.9863	-14.0381
44.8	-32.959	-20.1416	-20.752	-17.0898	-7.93457	-14.0381	-10.9863	-11.5967	-14.0381	-12.207	-16.4795	-17.0898	-9.76562
44.9	-38.4521	-28.0762	-21.9727	-14.6484	-12.207	-10.9863	-15.2588	-14.6484	-16.4795	-19.5312	-10.9863	-8.54492	-10.9863
45	-39.6729	-22.583	-9.76562	-16.4795	-17.0898	-13.4277	-10.376	-15.8691	-8.54492	-15.2588	-12.207	-14.0381	-15.8691
45.1	-35.4004	-23.8037	-15.2588	-15.2588	-17.0898	-13.4277	-15.2588	-7.93457	-15.8691	-14.6484	-12.207	-16.4795	-14.6484
45.2	-32.959	-23.1934	-17.0898	-14.0381	-8.54492	-10.376	-9.76562	-12.8174	-13.4277	-15.2588	-11.5967	-20.1416	-10.376
45.3	-35.4004	-25.6348	-20.752	-10.376	-12.8174	-10.376	-7.32422	-14.0381	-8.54492	-15.2588	-10.9863	-9.15527	-13.4277
45.4	-31.7383	-26.2451	-20.752	-20.1416	-12.8174	-9.76562	-11.5967	-9.76562	-10.9863	-12.8174	-16.4795	-15.2588	-10.9863
45.5	-35.4004	-23.8037	-16.4795	-15.8691	-14.0381	-16.4795	-12.8174	-11.5967	-6.71387	-10.9863	-17.7002	-17.0898	-11.5967
45.6	-42.1143	-20.1416	-18.3105	-17.0898	-11.5967	-8.54492	-8.54492	-7.93457	-12.8174	-10.9863	-6.71387	-16.4795	-9.15527
45.7	-35.4004	-18.9209	-15.8691	-17.0898	-17.7002	-12.8174	-8.54492	-15.2588	-18.9209	-14.6484	-10.9863	-14.0381	-10.9863
45.8	-35.4004	-29.2969	-17.7002	-17.7002	-15.2588	-14.0381	-12.8174	-17.0898	-8.54492	-9.76562	-13.4277	-14.0381	-15.2588
45.9	-36.6211	-21.9727	-18.9209	-17.7002	-15.2588	-11.5967	-10.376	-8.54492	-14.6484	-15.8691	-14.0381	-10.376	-10.9863
46	-39.6729	-22.583	-18.3105	-16.4795	-13.4277	-9.15527	-13.4277	-9.76562	-14.6484	-14.6484	-13.4277	-16.4795	-15.8691
46.1	-39.0625	-23.8037	-15.8691	-15.2588	-14.6484	-11.5967	-8.54492	-11.5967	-12.207	-13.4277	-15.8691	-13.4277	-7.32422
46.2	-39.6729	-21.3623	-21.9727	-20.752	-12.207	-9.76562	-11.5967	-10.376	-14.6484	-10.9863	-9.76562	-11.5967	-15.2588
46.3	-35.4004	-25.0244	-19.5312	-12.207	-12.207	-10.9863	-10.376	-15.2588	-12.8174	-15.8691	-12.207	-7.32422	-10.376
46.4	-36.0107	-24.4141	-13.4277	-14.6484	-9.76562	-13.4277	-8.54492	-11.5967	-12.8174	-16.4795	-8.54492	-16.4795	-14.0381
46.5	-32.959	-25.0244	-17.7002	-15.8691	-14.6484	-12.207	-18.3105	-15.8691	-15.2588	-17.7002	-15.8691	-10.376	-10.376
46.6	-37.2314	-24.4141	-11.5967	-15.2588	-4.27246	-10.376	-14.6484	-15.2588	-14.0381	-5.49316	-17.7002	-13.4277	-7.32422
46.7	-40.2832	-23.1934	-17.7002	-17.0898	-12.207	-15.8691	-11.5967	-17.0898	-14.6484	-12.207	-12.207	-13.4277	-9.76562
46.8	-39.0625	-23.1934	-20.1416	-10.376	-15.8691	-6.71387	-14.6484	-10.376	-15.8691	-15.8691	-7.32422	-13.4277	-20.752
46.9	-32.3486	-20.752	-18.3105	-10.9863	-14.0381	-19.5312	-11.5967	-10.376	-15.8691	-14.0381	-14.6484	-10.9863	-11.5967
47	-37.2314	-25.6348	-15.8691	-18.3105	-11.5967	-6.71387	-15.8691	-12.8174	-10.9863	-16.4795	-14.6484	-15.8691	-11.5967
47.1	-34.1797	-20.752	-19.5312	-19.5312	-13.4277	-12.207	-9.76562	-12.207	-16.4795	-19.5312	-12.207	-10.376	-6.10352
47.2	-37.8418	-24.4141	-18.9209	-15.2588	-12.8174	-10.9863	-12.8174	-17.0898	-14.6484	-14.0381	-11.5967	-20.1416	-10.9863
47.3	-37.2314	-25.0244	-20.1416	-19.5312	-14.6484	-11.5967	-11.5967	-12.8174	-15.2588	-12.8174	-13.4277	-15.8691	-9.76562
47.4	-34.79	-24.4141	-14.6484	-9.15527	-10.376	-12.207	-10.9863	-6.10352	-20.752	-14.0381	-14.6484	-16.4795	-13.4277
47.5	-38.4521	-32.3486	-21.9727	-20.1416	-12.207	-9.76562	-14.0381	-9.15527	-15.2588	-5.49316	-10.9863	-12.207	-15.8691
47.6	-34.1797	-21.9727	-15.8691	-16.4795	-6.10352	-11.5967	-4.88281	-12.207	-9.76562	-15.8691	-15.2588	-12.207	-9.76562
47.7	-42.1143	-26.2451	-21.3623	-11.5967	-10.376	-13.4277	-11.5967	-12.8174	-13.4277	-21.3623	-10.9863	-9.76562	-12.8174
47.8	-36.0107	-21.3623	-13.4277	-13.4277	-10.9863	-9.15527	-14.6484	-9.76562	-9.15527	-18.9209	-12.8174	-10.9863	-11.5967
47.9	-36.6211	-20.1416	-21.9727	-15.2588	-12.8174	-14.0381	-6.71387	-8.54492	-15.2588	-11.5967	-7.32422	-14.6484	-13.4277
48	-38.4521	-24.4141	-23.1934	-12.8174	-9.76562	-10.9863	-15.8691	-14.0381	-7.93457	-11.5967	-9.15527	-14.6484	-12.8174
48.1	-36.0107	-22.583	-18.9209	-20.1416	-11.5967	-13.4277	-11.5967	-8.54492	-13.4277	-13.4277	-9.15527	-13.4277	-14.0381
48.2	-34.79	-28.6865	-18.3105	-15.8691	-9.15527	-16.4795	-12.8174	-14.0381	-13.4277	-10.376	-10.9863	-17.0898	-11.5967
48.3	-36.0107	-19.5312	-17.7002	-13.4277	-10.376	-18.3105	-10.376	-15.8691	-14.6484	-14.6484	-14.6484	-16.4795	-14.0381
48.4	-37.2314	-28.0762	-20.1416	-13.4277	-10.9863	-14.0381	-9.76562	-7.93457	-12.8174	-13.4277	-9.15527	-12.207	-11.5967
48.5	-39.6729	-24.4141	-15.8691	-20.752	-10.376	-11.5967	-10.9863	-9.76562	-14.0381	-14.6484	-7.93457	-12.207	-17.7002
48.6	-34.1797	-22.583	-17.0898	-20.1416	-13.4277	-13.4277	-7.32422	-14.6484	-14.0381	-17.7002	-10.376	-10.9863	-11.5967
48.7	-37.8418	-23.1934	-17.0898	-13.4277	-16.4795	-6.10352	-14.6484	-10.9863	-17.0898	-18.3105	-9.15527	-12.8174	-9.15527
48.8	-39.6729	-22.583	-15.2588	-10.9863	-14.6484	-12.8174	-12.8174	-9.76562	-13.4277	-12.207	-12.8174	-15.8691	-12.8174
48.9	-32.3486	-21.9727	-14.6484	-17.7002	-17.0898	-13.4277	-7.32422	-12.207	-17.0898	-14.6484	-9.76562	-14.0381	-10.9863
49	-30.5176	-20.752	-16.4795	-14.6484	-18.3105	-17.0898	-10.9863	-7.32422	-16.4795	-13.4277	-15.8691	-14.0381	-14.6484
49.1	-39.0625	-29.2969	-20.1416	-19.5312	-11.5967	-17.0898	-8.54492	-10.376	-13.4277	-10.9863	-12.207	-14.6484	-13.4277
49.2	-32.959	-25.6348	-12.8174	-21.9727	-13.4277	-12.207	-10.9863	-23.1934	-18.3105	-15.2588	-10.376	-15.2588	-12.8174
49.3	-35.4004	-25.6348	-18.3105	-16.4795	-9.15527	-13.4277	-17.7002	-14.0381	-16.4795	-16.4795	-9.76562	-13.4277	-13.4277
49.4	-34.1797	-23.8037	-14.6484	-15.2588	-6.10352	-14.6484	-12.207	-10.9863	-15.8691	-13.4277	-14.6484	-10.376	-13.4277
49.5	-34.79	-21.9727	-17.0898	-10.9863	-15.8691	-12.207	-9.76562	-14.6484	-20.1416	-15.8691	-14.0381	-12.207	-11.5967
49.6	-30.5176	-20.1416	-16.4795	-18.9209	-4.88281	-13.4277	-9.76562	-15.8691	-16.4795	-11.5967	-11.5967	-14.6484	-14.0381
49.7	-27.4658	-25.6348	-13.4277	-10.9863	-9.15527	-11.5967	-15.8691	-10.376	-12.207	-3.66211	-10.376	-10.9863	-13.4277
49.8	-33.5693	-24.4141	-14.0381	-20.1416	-12.8174	-10.376	-7.32422	-12.8174	-12.207	-13.4277	-7.32422	-7.93457	-12.207
49.9	-30.5176	-23.1934	-19.5312	-6.71387	-13.4277	-9.15527	-9.76562	-14.6484	-17.7002	-18.9209	-12.207	-11.5967	-10.376
50	-35.4004	-21.3623	-15.2588	-14.0381	-9.15527	-11.5967	-12.8174	-14.0381	-10.9863	-11.5967	-6.10352	-16.4795	-15.2588
50.1	-31.1279	-30.5176	-15.8691	-21.3623	-12.8174	-8.54492	-8.54492	-12.207	-21.3623	-12.8174	-9.76562	-7.32422	-9.15527
50.2	-34.1797	-23.8037	-14.6484	-11.5967	-17.0898	-5.49316	-16.4795	-9.15527	-17.0898	-15.8691	-11.5967	-11.5967	-12.8174
50.3	-41.5039	-23.1934	-14.6484	-21.3623	-10.376	-13.4277	-8.54492	-12.207	-12.8174	-12.207	-4.88281	-9.15527	-7.32422
50.4	-35.4004	-25.0244	-14.6484	-14.0381	-11.5967	-14.6484	-12.8174	-10.9863	-13.4277	-17.7002	-12.207	-14.6484	-16.4795
50.5	-43.335	-23.8037	-20.1416	-15.8691	-10.9863	-12.8174	-10.9863	-11.5967	-15.2588	-10.376	-12.8174	-10.376	-17.0898
50.6	-35.4004	-26.2451	-13.4277	-11.5967	-12.8174	-12.207	-12.8174	-14.6484	-17.0898	-11.5967	-12.207	-18.3105	-12.8174
50.7	-32.959	-21.9727	-13.4277	-14.6484	-20.752	-7.32422	-8.54492	-12.8174	-14.6484	-14.0381	-11.5967	-18.3105	-12.207
50.8	-32.3486	-24.4141	-18.3105	-18.9209	-14.6484	-11.5967	-15.8691	-10.9863	-17.7002	-15.2588	-11.5967	-22.583	-17.0898
50.9	-39.6729	-28.0762	-16.4795	-17.0898	-10.9863	-12.207	-13.4277	-9.15527	-12.8174	-10.9863	-11.5967	-11.5967	-12.8174
51	-40.8936	-25.0244	-17.0898	-18.3105	-15.2588	-9.15527	-7.32422	-17.7002	-10.9863	-12.8174	-13.4277	-13.4277	-9.76562
51.1	-39.0625	-28.0762	-14.0381	-14.6484	-17.0898	-7.93457	-17.0898	-14.0381	-17.0898	-14.6484	-12.207	-14.6484	-9.15527
51.2	-39.0625	-26.2451	-13.4277	-14.6484	-11.5967	-14.0381	-11.5967	-13.4277	-13.4277	-16.4795	-12.207	-17.7002	-13.4277
51.3	-35.4004	-18.9209	-16.4795	-10.9863	-7.93457	-14.0381	-8.54492	-6.10352	-13.4277	-7.93457	-13.4277	-18.9209	-17.0898
51.4	-35.4004	-24.4141	-13.4277	-14.6484	-12.207	-6.10352	-12.8174	-14.6484	-17.0898	-10.376	-10.9863	-16.4795	-12.8174
51.5	-37.8418	-22.583	-15.8691	-18.3105	-12.207	-14.6484	-14.6484	-14.6484	-12.207	-10.9863	-7.93457	-12.8174	-13.4277
51.6	-39.0625	-23.1934	-18.9209	-15.2588	-16.4795	-13.4277	-5.49316	-12.8174	-18.3105	-10.9863	-12.207	-11.5967	-7.93457
51.7	-39.6729	-29.2969	-13.4277	-20.752	-9.15527	-6.10352	-13.4277	-10.376	-9.15527	-15.8691	-17.0898	-9.15527	-12.207
51.8	-39.6729	-25.0244	-15.2588	-15.8691	-12.207	-7.32422	-9.76562	-15.2588	-13.4277	-15.8691	-7.93457	-12.8174	-9.76562
51.9	-35.4004	-20.752	-16.4795	-18.3105	-15.8691	-14.0381	-18.9209	-15.2588	-13.4277	-8.54492	-11.5967	-13.4277	-16.4795
52	-38.4521	-26.8555	-20.1416	-11.5967	-13.4277	-12.8174	-14.6484	-10.9863	-17.0898	-15.2588	-10.376	-17.0898	-14.6484
52.1	-37.2314	-21.9727	-14.6484	-18.9209	-10.9863	-12.207	-15.8691	-12.207	-16.4795	-18.3105	-10.9863	-14.6484	-15.8691
52.2	-37.2314	-23.8037	-14.0381	-13.4277	-10.376	-14.0381	-9.76562	-9.76562	-15.8691	-17.0898	-12.207	-17.7002	-16.4795
52.3	-38.4521	-25.6348	-19.5312	-17.7002	-10.9863	-14.6484	-13.4277	-15.2588	-16.4795	-14.6484	-10.376	-12.8174	-12.8174
52.4	-32.959	-18.3105	-14.0381	-18.9209	-10.376	-16.4795	-7.32422	-14.0381	-17.7002	-14.0381	-13.4277	-9.15527	-7.32422
52.5	-34.1797	-24.4141	-9.76562	-15.2588	-10.376	-7.93457	-9.76562	-14.0381	-12.207	-10.376	-10.376	-10.376	-14.0381
52.6	-33.5693	-26.2451	-19.5312	-17.0898	-12.8174	-4.88281	-12.8174	-10.376	-15.8691	-8.54492	-8.54492	-17.7002	-15.8691
52.7	-36.6211	-21.3623	-15.2588	-19.5312	-8.54492	-14.6484	-13.4277	-15.2588	-20.1416	-5.49316	-10.376	-14.0381	-9.76562
52.8	-39.0625	-28.0762	-17.0898	-15.2588	-12.207	-10.9863	-7.32422	-14.0381	-13.4277	-12.207	-9.76562	-12.207	-15.2588
52.9	-44.5557	-23.1934	-16.4795	-18.9209	-15.2588	-16.4795	-12.8174	-7.93457	-14.6484	-17.0898	-13.4277	-14.0381	-14.0381
53	-39.0625	-25.0244	-15.8691	-18.9209	-20.1416	-11.5967	-10.376	-15.8691	-13.4277	-15.2588	-13.4277	-10.9863	-14.6484
53.1	-36.0107	-25.6348	-23.1934	-21.9727	-16.4795	-12.8174	-9.76562	-14.0381	-14.6484	-10.376	-12.207	-11.5967	-12.8174
53.2	-36.0107	-29.2969	-11.5967	-18.3105	-12.207	-9.76562	-13.4277	-9.76562	-10.9863	-12.8174	-18.3105	-9.76562	-10.376
53.3	-40.8936	-25.6348	-21.9727	-17.7002	-12.8174	-12.8174	-15.2588	-10.376	-15.2588	-18.3105	-11.5967	-17.0898	-12.207
53.4	-34.79	-26.8555	-20.1416	-18.3105	-6.71387	-12.207	-15.2588	-17.7002	-14.0381	-10.9863	-8.54492	-14.0381	-12.207
53.5	-37.8418	-23.1934	-17.7002	-9.76562	-15.8691	-5.49316	-3.66211	-12.8174	-15.2588	-11.5967	-13.4277	-16.4795	-7.93457
53.6	-35.4004	-25.0244	-20.752	-11.5967	-10.376	-10.9863	-10.9863	-15.8691	-14.0381	-8.54492	-9.76562	-8.54492	-12.8174
53.7	-38.4521	-25.6348	-19.5312	-14.6484	-14.0381	-9.76562	-10.376	-15.8691	-15.8691	-15.2588	-12.207	-17.0898	-15.8691
53.8	-38.4521	-23.1934	-14.0381	-15.2588	-12.8174	-8.54492	-15.8691	-14.6484	-12.207	-6.10352	-7.32422	-12.207	-10.9863
53.9	-36.0107	-24.4141	-20.752	-14.6484	-13.4277	-10.376	-9.76562	-12.207	-9.76562	-9.76562	-12.8174	-16.4795	-16.4795
54	-41.5039	-26.2451	-18.9209	-15.8691	-16.4795	-15.2588	-10.9863	-8.54492	-17.7002	-17.0898	-11.5967	-10.376	-15.2588
54.1	-39.0625	-19.5312	-15.8691	-19.5312	-12.207	-14.0381	-14.6484	-7.32422	-12.8174	-17.0898	-9.15527	-16.4795	-13.4277
54.2	-36.0107	-29.2969	-18.9209	-18.3105	-7.32422	-10.9863	-12.207	-17.0898	-17.0898	-17.0898	-12.207	-14.6484	-10.9863
54.3	-37.2314	-24.4141	-11.5967	-16.4795	-2.44141	-14.6484	-10.376	-15.8691	-20.1416	-12.8174	-9.76562	-17.0898	-10.9863
54.4	-35.4004	-27.4658	-17.0898	-14.6484	-12.207	-15.2588	-14.6484	-14.0381	-8.54492	-12.8174	-12.207	-14.6484	-9.15527
54.5	-36.0107	-17.7002	-20.752	-14.6484	-11.5967	-8.54492	-16.4795	-10.376	-11.5967	-11.5967	-15.2588	-18.3105	-12.207
54.6	-35.4004	-25.6348	-23.1934	-19.5312	-12.207	-11.5967	-14.0381	-18.3105	-10.376	-12.8174	-18.9209	-14.0381	-15.2588
54.7	-38.4521	-23.1934	-19.5312	-14.6484	-8.54492	-15.2588	-7.93457	-14.0381	-12.207	-9.76562	-9.76562	-14.6484	-10.9863
54.8	-36.0107	-21.3623	-16.4795	-15.8691	-12.207	-6.10352	-10.9863	-12.8174	-11.5967	-15.2588	-9.15527	-18.3105	-12.8174
54.9	-39.0625	-22.583	-18.9209	-12.8174	-16.4795	-10.9863	-11.5967	-13.4277	-17.7002	-12.8174	-8.54492	-14.6484	-12.8174
55	-36.0107	-25.0244	-20.752	-12.8174	-7.93457	-8.54492	-11.5967	-12.8174	-15.2588	-10.9863	-15.2588	-10.376	-13.4277
55.1	-36.6211	-23.8037	-22.583	-18.3105	-8.54492	-10.376	-14.0381	-10.9863	-20.1416	-12.207	-10.376	-11.5967	-6.10352
55.2	-38.4521	-20.752	-21.9727	-17.7002	-14.6484	-8.54492	-12.8174	-10.9863	-11.5967	-13.4277	-16.4795	-17.0898	-11.5967
55.3	-37.2314	-23.8037	-23.8037	-14.6484	-14.0381	-10.376	-13.4277	-17.7002	-17.7002	-9.76562	-14.0381	-9.15527	-8.54492
55.4	-32.3486	-21.3623	-18.9209	-17.7002	-12.207	-6.71387	-10.9863	-12.8174	-12.8174	-11.5967	-8.54492	-12.8174	-15.2588
55.5	-29.9072	-16.4795	-20.752	-21.3623	-15.8691	-15.2588	-9.76562	-14.6484	-14.0381	-15.8691	-10.376	-15.8691	-7.93457
55.6	-38.4521	-20.1416	-17.0898	-21.3623	-13.4277	-5.49316	-10.9863	-13.4277	-14.0381	-12.207	-9.15527	-15.2588	-15.2588
55.7	-36.0107	-25.6348	-18.3105	-18.3105	-15.8691	-7.93457	-8.54492	-15.2588	-10.376	-15.8691	-11.5967	-15.8691	-11.5967
55.8	-31.1279	-25.0244	-19.5312	-20.1416	-13.4277	-14.0381	-12.207	-12.8174	-17.0898	-10.9863	-12.8174	-18.3105	-10.376
55.9	-40.2832	-21.9727	-14.6484	-15.8691	-14.0381	-14.0381	-13.4277	-10.9863	-14.6484	-14.6484	-8.54492	-15.8691	-13.4277
56	-36.0107	-21.3623	-20.1416	-14.0381	-12.207	-9.15527	-10.9863	-13.4277	-11.5967	-9.15527	-18.9209	-11.5967	-14.0381
56.1	-35.4004	-17.0898	-19.5312	-16.4795	-16.4795	-7.32422	-17.0898	-6.71387	-18.9209	-10.376	-12.207	-11.5967	-9.15527
56.2	-33.5693	-23.1934	-18.9209	-15.8691	-7.32422	-16.4795	-14.6484	-8.54492	-10.376	-9.15527	-12.207	-14.6484	-13.4277
56.3	-34.79	-22.583	-20.1416	-17.7002	-10.9863	-5.49316	-9.76562	-9.15527	-10.9863	-8.54492	-12.207	-17.0898	-11.5967
56.4	-40.2832	-23.1934	-20.1416	-14.6484	-12.8174	-9.76562	-14.6484	-14.6484	-13.4277	-17.7002	-18.3105	-13.4277	-14.6484
56.5	-32.959	-21.9727	-20.1416	-15.2588	-10.376	-10.9863	-12.207	-12.207	-10.9863	-12.8174	-18.3105	-12.207	-12.207
56.6	-38.4521	-24.4141	-18.3105	-15.8691	-11.5967	-5.49316	-13.4277	-9.15527	-17.7002	-18.9209	-7.32422	-12.207	-12.207
56.7	-38.4521	-21.3623	-18.9209	-13.4277	-9.15527	-14.6484	-13.4277	-9.76562	-10.9863	-9.76562	-7.32422	-15.2588	-13.4277
56.8	-37.2314	-23.1934	-20.752	-17.7002	-15.2588	-9.76562	-13.4277	-12.207	-16.4795	-7.32422	-10.9863	-15.8691	-7.32422
56.9	-35.4004	-24.4141	-22.583	-16.4795	-9.76562	-8.54492	-11.5967	-11.5967	-16.4795	-17.0898	-14.0381	-17.7002	-6.71387
57	-36.6211	-23.1934	-15.8691	-9.15527	-16.4795	-12.8174	-18.9209	-9.15527	-13.4277	-12.207	-15.8691	-11.5967	-11.5967
57.1	-32.3486	-21.9727	-17.7002	-10.376	-12.207	-7.93457	-9.76562	-17.7002	-10.9863	-14.0381	-11.5967	-18.3105	-15.2588
57.2	-35.4004	-23.1934	-19.5312	-20.752	-10.9863	-10.9863	-15.8691	-11.5967	-12.207	-15.8691	-10.9863	-12.207	-10.376
57.3	-32.3486	-27.4658	-19.5312	-14.0381	-15.8691	-9.76562	-10.9863	-12.8174	-11.5967	-15.2588	-10.376	-12.207	-11.5967
57.4	-34.79	-25.6348	-12.207	-12.8174	-9.76562	-13.4277	-12.207	-14.0381	-12.8174	-14.0381	-14.6484	-15.2588	-14.0381
57.5	-37.2314	-20.752	-21.3623	-21.9727	-12.207	-9.15527	-18.9209	-6.10352	-15.2588	-13.4277	-11.5967	-10.9863	-12.207
57.6	-34.1797	-20.752	-19.5312	-14.0381	-10.9863	-6.10352	-10.376	-13.4277	-10.9863	-12.8174	-9.15527	-18.3105	-18.3105
57.7	-36.6211	-19.5312	-19.5312	-14.0381	-16.4795	-14.6484	-14.6484	-10.376	-11.5967	-18.9209	-13.4277	-18.3105	-10.9863
57.8	-36.0107	-22.583	-17.7002	-17.0898	-10.9863	-10.376	-6.10352	-11.5967	-12.207	-10.376	-8.54492	-11.5967	-9.15527
57.9	-34.79	-24.4141	-17.7002	-12.207	-13.4277	-10.9863	-9.76562	-12.8174	-14.0381	-11.5967	-17.0898	-19.5312	-9.76562
58	-32.3486	-22.583	-18.9209	-21.3623	-14.6484	-12.207	-12.8174	-12.8174	-14.0381	-18.3105	-17.0898	-10.9863	-8.54492
58.1	-29.2969	-29.9072	-17.7002	-17.0898	-7.32422	-16.4795	-12.8174	-14.0381	-16.4795	-9.76562	-6.71387	-18.3105	-10.9863
58.2	-36.0107	-28.0762	-18.3105	-20.752	-13.4277	-13.4277	-15.2588	-14.0381	-14.0381	-15.2588	-12.8174	-13.4277	-11.5967
58.3	-35.4004	-23.8037	-19.5312	-18.3105	-8.54492	-15.8691	-9.76562	-10.9863	-5.49316	-5.49316	-15.8691	-9.15527	-14.0381
58.4	-34.1797	-29.2969	-17.0898	-17.0898	-12.8174	-14.6484	-14.6484	-15.8691	-20.1416	-11.5967	-22.583	-17.7002	-2.44141
58.5	-37.2314	-22.583	-18.3105	-17.0898	-13.4277	-12.207	-12.8174	-12.207	-15.2588	-11.5967	-6.10352	-14.6484	-6.71387
58.6	-36.0107	-26.2451	-21.9727	-17.7002	-15.2588	-12.8174	-14.6484	-15.2588	-3.66211	-15.8691	-9.76562	-12.207	-8.54492
58.7	-33.5693	-24.4141	-18.9209	-15.2588	-13.4277	-13.4277	-7.32422	-12.207	-14.6484	-10.376	-10.9863	-10.376	-14.0381
58.8	-34.79	-22.583	-18.9209	-17.0898	-4.27246	-10.9863	-18.3105	-9.76562	-14.6484	-15.8691	-18.3105	-17.0898	-14.0381
58.9	-38.4521	-24.4141	-20.752	-13.4277	-10.376	-16.4795	-12.8174	-13.4277	-13.4277	-9.15527	-13.4277	-14.6484	-10.376
59	-36.0107	-26.8555	-19.5312	-17.0898	-10.376	-10.376	-13.4277	-13.4277	-14.0381	-13.4277	-13.4277	-10.9863	-7.32422
59.1	-37.2314	-18.9209	-22.583	-12.8174	-9.76562	-11.5967	-14.0381	-13.4277	-14.0381	-12.8174	-7.93457	-15.8691	-10.376
59.2	-33.5693	-26.8555	-19.5312	-15.2588	-12.207	-9.76562	-10.9863	-12.8174	-10.9863	-17.0898	-15.2588	-15.2588	-10.9863
59.3	-36.6211	-25.6348	-16.4795	-13.4277	-13.4277	-12.207	-11.5967	-14.0381	-14.6484	-9.76562	-7.32422	-17.7002	-17.7002
59.4	-38.4521	-23.1934	-20.1416	-12.8174	-12.207	-7.32422	-14.6484	-9.15527	-14.6484	-10.9863	-8.54492	-12.207	-10.9863
59.5	-37.2314	-21.9727	-15.2588	-15.2588	-11.5967	-6.71387	-12.8174	-9.76562	-11.5967	-10.376	-9.15527	-17.0898	-11.5967
59.6	-40.8936	-23.1934	-16.4795	-16.4795	-17.7002	-15.2588	-12.207	-10.376	-12.8174	-14.0381	-14.0381	-15.2588	-5.49316
59.7	-35.4004	-27.4658	-17.0898	-12.207	-13.4277	-14.6484	-6.71387	-9.76562	-10.376	-10.9863	-11.5967	-17.0898	-16.4795
59.8	-32.3486	-24.4141	-12.8174	-11.5967	-5.49316	-12.207	-5.49316	-12.8174	-6.71387	-18.3105	-11.5967	-15.2588	-10.376
59.9	-39.6729	-17.0898	-14.0381	-15.2588	-13.4277	-9.76562	-10.9863	-7.93457	-11.5967	-14.6484	-15.2588	-15.8691	-15.8691
60	-34.79	-23.8037	-18.9209	-18.3105	-12.207	-11.5967	-18.9209	-14.6484	-12.207	-15.8691	-10.9863	-10.376	-9.76562
60.1	-36.0107	-29.9072	-26.8555	-18.3105	-10.9863	-10.376	-12.8174	-10.9863	-13.4277	-11.5967	-12.207	-14.6484	-7.93457
60.2	-33.5693	-23.1934	-19.5312	-18.3105	-10.9863	-12.207	-7.93457	-15.2588	-12.8174	-10.9863	-11.5967	-17.7002	-13.4277
60.3	-36.6211	-25.0244	-18.9209	-17.7002	-14.6484	-16.4795	-14.6484	-10.9863	-16.4795	-17.7002	-7.32422	-16.4795	-7.93457
60.4	-32.3486	-26.8555	-14.6484	-17.7002	-13.4277	-9.76562	-11.5967	-10.9863	-11.5967	-9.76562	-12.8174	-18.9209	-4.88281
60.5	-39.6729	-24.4141	-22.583	-14.6484	-17.0898	-17.7002	-5.49316	-14.0381	-14.6484	-12.207	-12.207	-14.6484	-14.6484
60.6	-42.1143	-27.4658	-21.9727	-15.8691	-13.4277	-14.0381	-19.5312	-10.9863	-15.8691	-18.9209	-10.9863	-14.6484	-11.5967
60.7	-36.0107	-17.7002	-15.8691	-12.207	-15.8691	-15.8691	-9.76562	-14.0381	-14.6484	-12.207	-9.76562	-10.9863	-13.4277
60.8	-34.79	-20.752	-26.2451	-13.4277	-8.54492	-9.15527	-13.4277	-9.15527	-15.8691	-10.376	-10.376	-14.6484	-7.93457
60.9	-32.3486	-25.6348	-16.4795	-8.54492	-10.9863	-12.8174	-12.207	-10.9863	-16.4795	-18.3105	-13.4277	-17.0898	-12.8174
61	-32.959	-28.0762	-21.3623	-14.6484	-12.8174	-13.4277	-12.8174	-9.15527	-12.207	-15.8691	-16.4795	-13.4277	-10.376
61.1	-39.6729	-23.8037	-18.9209	-18.9209	-11.5967	-14.0381	-7.32422	-9.15527	-17.0898	-17.7002	-11.5967	-17.0898	-9.76562
61.2	-40.2832	-23.1934	-17.0898	-14.0381	-13.4277	-15.8691	-10.376	-11.5967	-13.4277	-13.4277	-9.76562	-15.2588	-11.5967
61.3	-33.5693	-24.4141	-15.2588	-18.3105	-12.8174	-8.54492	-9.15527	-17.7002	-11.5967	-10.376	-14.6484	-12.8174	-14.6484
61.4	-36.6211	-22.583	-20.752	-20.752	-9.76562	-10.9863	-11.5967	-15.2588	-14.0381	-12.8174	-7.93457	-7.93457	-10.376
61.5	-41.5039	-29.9072	-20.752	-15.2588	-4.88281	-13.4277	-10.9863	-14.6484	-9.76562	-9.76562	-14.6484	-10.9863	-12.207
61.6	-37.8418	-21.3623	-24.4141	-15.2588	-7.32422	-9.76562	-12.8174	-7.93457	-14.0381	-19.5312	-14.6484	-14.6484	-8.54492
61.7	-40.2832	-23.1934	-15.8691	-15.8691	-18.3105	-9.76562	-8.54492	-7.93457	-14.6484	-10.376	-12.207	-10.376	-16.4795
61.8	-41.5039	-25.6348	-13.4277	-18.9209	-13.4277	-10.9863	-14.0381	-12.207	-10.376	-15.2588	-13.4277	-17.7002	-9.76562
61.9	-35.4004	-20.752	-17.0898	-17.0898	-16.4795	-16.4795	-14.0381	-10.376	-11.5967	-9.76562	-12.8174	-15.8691	-12.207
62	-39.6729	-22.583	-16.4795	-17.0898	-8.54492	-19.5312	-7.32422	-12.207	-9.76562	-9.76562	-17.7002	-15.8691	-12.207
62.1	-34.79	-25.6348	-21.9727	-18.3105	-17.0898	-13.4277	-13.4277	-14.6484	-14.6484	-10.376	-13.4277	-12.207	-12.8174
62.2	-33.5693	-23.1934	-16.4795	-18.3105	-12.207	-9.76562	-9.76562	-7.32422	-14.6484	-12.8174	-14.0381	-13.4277	-7.93457
62.3	-39.0625	-20.1416	-14.0381	-18.9209	-12.8174	-14.0381	-12.207	-11.5967	-12.207	-19.5312	-10.9863	-15.2588	-10.376
62.4	-39.0625	-21.9727	-15.2588	-18.3105	-14.0381	-12.207	-12.8174	-18.3105	-10.9863	-14.6484	-12.207	-12.207	-6.10352
62.5	-37.2314	-24.4141	-17.0898	-21.3623	-10.376	-15.2588	-5.49316	-12.8174	-14.6484	-16.4795	-13.4277	-9.76562	-14.6484
62.6	-34.1797	-21.9727	-11.5967	-20.1416	-10.376	-10.9863	-15.8691	-10.9863	-21.3623	-10.376	-9.76562	-11.5967	-14.0381
62.7	-34.79	-20.752	-21.9727	-15.2588	-12.207	-7.93457	-13.4277	-15.2588	-12.207	-16.4795	-12.207	-12.8174	-10.9863
62.8	-34.1797	-24.4141	-13.4277	-16.4795	-10.9863	-14.0381	-13.4277	-17.0898	-8.54492	-12.8174	-13.4277	-12.207	-10.376
62.9	-36.6211	-24.4141	-18.9209	-15.2588	-9.15527	-9.15527	-14.0381	-7.32422	-10.9863	-12.207	-14.0381	-15.2588	-12.207
63	-34.1797	-21.3623	-20.752	-16.4795	-9.15527	-10.9863	-8.54492	-7.32422	-14.0381	-14.6484	-10.376	-12.8174	-11.5967
63.1	-28.0762	-19.5312	-20.752	-19.5312	-10.376	-14.6484	-11.5967	-9.15527	-12.207	-18.3105	-13.4277	-15.2588	-10.376
63.2	-37.8418	-25.6348	-17.0898	-15.8691	-11.5967	-7.93457	-9.15527	-16.4795	-11.5967	-14.6484	-10.376	-17.0898	-5.49316
63.3	-29.9072	-27.4658	-18.3105	-14.6484	-14.0381	-12.8174	-9.76562	-11.5967	-17.0898	-8.54492	-4.88281	-12.207	-12.8174
63.4	-39.6729	-18.3105	-21.3623	-16.4795	-10.9863	-9.15527	-8.54492	-7.32422	-12.8174	-15.2588	-10.9863	-13.4277	-15.2588
63.5	-33.5693	-21.9727	-15.8691	-15.8691	-15.2588	-18.3105	-12.207	-15.8691	-17.7002	-17.0898	-14.6484	-12.8174	-7.93457
63.6	-33.5693	-23.1934	-20.752	-16.4795	-9.76562	-17.0898	-12.207	-14.0381	-12.207	-12.207	-15.2588	-8.54492	-17.7002
63.7	-31.7383	-20.1416	-23.8037	-16.4795	-9.15527	-14.6484	-11.5967	-10.9863	-14.6484	-11.5967	-11.5967	-18.3105	-8.54492
63.8	-37.2314	-20.752	-18.3105	-20.752	-10.376	-12.207	-7.93457	-12.207	-9.76562	-14.0381	-14.0381	-13.4277	-11.5967
63.9	-31.1279	-17.7002	-12.8174	-13.4277	-11.5967	-4.88281	-17.0898	-8.54492	-15.2588	-16.4795	-10.9863	-9.76562	-10.376
64	-34.1797	-23.8037	-20.752	-19.5312	-14.0381	-14.6484	-9.76562	-10.9863	-14.0381	-16.4795	-10.376	-10.9863	-10.9863
64.1	-37.2314	-23.1934	-12.207	-17.7002	-6.71387	-18.9209	-10.9863	-12.207	-12.8174	-5.49316	-7.32422	-9.15527	-13.4277
64.2	-39.6729	-24.4141	-18.9209	-19.5312	-10.376	-18.9209	-7.32422	-14.0381	-15.8691	-12.8174	-11.5967	-10.9863	-13.4277
64.3	-32.959	-25.6348	-18.3105	-10.9863	-7.32422	-9.15527	-15.8691	-15.8691	-14.6484	-8.54492	-12.207	-11.5967	-8.54492
64.4	-34.79	-22.583	-16.4795	-21.9727	-13.4277	-6.71387	-18.3105	-11.5967	-14.0381	-8.54492	-12.8174	-9.76562	-12.8174
64.5	-34.1797	-17.0898	-11.5967	-14.6484	-12.8174	-9.15527	-6.10352	-16.4795	-17.0898	-17.7002	-9.15527	-18.3105	-11.5967
64.6	-31.1279	-21.3623	-18.9209	-15.8691	-18.3105	-9.76562	-9.76562	-17.0898	-15.2588	-12.8174	-15.2588	-15.2588	-8.54492
64.7	-34.79	-18.3105	-19.5312	-15.2588	-7.93457	-15.2588	-12.8174	-14.0381	-12.207	-14.0381	-13.4277	-15.2588	-10.376
64.8	-31.1279	-20.1416	-22.583	-16.4795	-15.2588	-10.9863	-11.5967	-7.93457	-8.54492	-10.376	-15.8691	-9.15527	-17.0898
64.9	-40.2832	-22.583	-9.15527	-12.207	-12.8174	-18.9209	-13.4277	-15.8691	-13.4277	-15.2588	-11.5967	-12.8174	-12.8174
65	-36.6211	-25.6348	-14.0381	-21.3623	-14.0381	-3.05176	-16.4795	-9.15527	-11.5967	-20.1416	-7.32422	-11.5967	-10.9863
65.1	-34.79	-22.583	-17.7002	-20.752	-14.0381	-14.0381	-8.54492	-13.4277	-14.0381	-13.4277	-11.5967	-16.4795	-14.0381
65.2	-30.5176	-18.9209	-14.6484	-15.2588	-12.8174	-10.376	-6.71387	-9.76562	-16.4795	-12.207	-10.9863	-19.5312	-14.0381
65.3	-36.6211	-18.9209	-17.7002	-12.207	-10.376	-18.9209	-6.10352	-10.9863	-15.2588	-13.4277	-14.6484	-7.32422	-12.207
65.4	-37.2314	-23.8037	-16.4795	-21.9727	-10.376	-14.0381	-14.6484	-7.93457	-12.207	-19.5312	-9.76562	-16.4795	-12.207
65.5	-38.4521	-18.9209	-17.0898	-17.0898	-14.6484	-17.0898	-15.2588	-14.6484	-14.6484	-12.8174	-16.4795	-15.2588	-7.32422
65.6	-34.1797	-23.8037	-17.0898	-17.0898	-13.4277	-11.5967	-12.207	-14.0381	-13.4277	-14.0381	-14.0381	-14.0381	-13.4277
65.7	-32.3486	-21.3623	-18.3105	-14.0381	-7.93457	-10.9863	-10.376	-9.15527	-11.5967	-14.6484	-14.6484	-14.0381	-13.4277
65.8	-34.1797	-21.3623	-13.4277	-15.8691	-15.2588	-8.54492	-8.54492	-12.207	-15.2588	-13.4277	-13.4277	-14.0381	-9.76562
65.9	-36.0107	-21.9727	-18.3105	-14.0381	-12.207	-14.6484	-12.8174	-9.76562	-15.2588	-13.4277	-11.5967	-15.2588	-9.76562
66	-38.4521	-21.3623	-18.9209	-18.3105	-7.32422	-8.54492	-13.4277	-12.207	-19.5312	-12.207	-8.54492	-10.9863	-9.76562
66.1	-32.959	-16.4795	-14.0381	-17.0898	-9.76562	-9.76562	-11.5967	-5.49316	-14.6484	-13.4277	-10.9863	-9.76562	-17.0898
66.2	-39.6729	-17.7002	-19.5312	-12.207	-10.9863	-12.8174	-10.9863	-14.0381	-15.2588	-12.8174	-14.0381	-12.8174	-14.0381
66.3	-32.3486	-21.3623	-13.4277	-16.4795	-7.32422	-10.9863	-10.376	-11.5967	-15.8691	-8.54492	-8.54492	-11.5967	-9.76562
66.4	-29.9072	-21.9727	-10.376	-15.8691	-14.6484	-8.54492	-10.376	-12.8174	-14.0381	-13.4277	-12.207	-5.49316	-10.376
66.5	-40.2832	-18.3105	-22.583	-20.752	-13.4277	-15.2588	-9.15527	-10.9863	-13.4277	-10.376	-11.5967	-9.76562	-10.376
66.6	-32.3486	-18.9209	-19.5312	-12.207	-10.376	-8.54492	-9.76562	-14.0381	-15.2588	-16.4795	-7.93457	-13.4277	-14.6484
66.7	-36.0107	-20.752	-11.5967	-17.7002	-15.8691	-8.54492	-14.0381	-13.4277	-16.4795	-12.8174	-10.9863	-20.752	-11.5967
66.8	-32.959	-18.9209	-17.7002	-12.8174	-15.8691	-13.4277	-15.2588	-13.4277	-9.76562	-12.8174	-8.54492	-10.376	-14.0381
66.9	-36.0107	-15.8691	-18.3105	-18.9209	-9.76562	-10.376	-12.207	-10.9863	-17.7002	-15.2588	-17.0898	-12.207	-15.2588
67	-31.7383	-18.9209	-18.3105	-17.0898	-12.8174	-10.376	-9.76562	-12.8174	-17.0898	-12.8174	-13.4277	-16.4795	-13.4277
67.1	-37.8418	-20.1416	-14.0381	-13.4277	-9.15527	-12.207	-10.376	-7.93457	-15.2588	-10.9863	-6.10352	-14.6484	-10.376
67.2	-32.959	-21.3623	-20.752	-18.9209	-10.9863	-12.8174	-9.15527	-17.0898	-17.7002	-13.4277	-13.4277	-15.2588	-10.9863
67.3	-33.5693	-21.3623	-20.1416	-15.2588	-15.8691	-1.2207	-11.5967	-12.8174	-20.1416	-15.8691	-12.207	-14.0381	-18.9209
67.4	-40.2832	-17.0898	-17.0898	-23.1934	-11.5967	-10.9863	-17.7002	-17.0898	-13.4277	-9.15527	-15.2588	-9.76562	-14.6484
67.5	-39.6729	-25.6348	-16.4795	-17.7002	-11.5967	-11.5967	-8.54492	-11.5967	-13.4277	-12.207	-12.207	-18.3105	-20.752
67.6	-38.4521	-28.0762	-21.9727	-15.2588	-10.376	-14.0381	-10.9863	-10.376	-12.8174	-14.0381	-8.54492	-9.15527	-14.0381
67.7	-40.8936	-23.8037	-16.4795	-15.8691	-14.0381	-13.4277	-14.0381	-9.15527	-12.8174	-11.5967	-17.0898	-12.207	-12.8174
67.8	-32.959	-25.0244	-12.8174	-15.2588	-18.3105	-10.376	-13.4277	-12.8174	-14.6484	-12.8174	-12.8174	-16.4795	-9.15527
67.9	-40.2832	-23.1934	-21.3623	-14.6484	-13.4277	-10.9863	-11.5967	-14.6484	-12.207	-20.752	-16.4795	-14.0381	-10.376
68	-37.8418	-25.0244	-15.8691	-10.376	-9.15527	-18.9209	-15.2588	-10.9863	-18.3105	-9.76562	-12.8174	-14.6484	-7.93457
68.1	-42.1143	-25.0244	-15.2588	-17.0898	-13.4277	-12.207	-13.4277	-10.9863	-14.0381	-14.6484	-9.15527	-17.7002	-14.0381
68.2	-38.4521	-24.4141	-11.5967	-17.0898	-9.15527	-12.207	-10.376	-11.5967	-14.0381	-10.9863	-14.6484	-12.207	-11.5967
68.3	-33.5693	-24.4141	-21.9727	-15.2588	-6.71387	-9.15527	-12.207	-12.207	-14.0381	-10.9863	-16.4795	-14.6484	-15.2588
68.4	-32.959	-24.4141	-15.8691	-16.4795	-15.8691	-8.54492	-11.5967	-15.2588	-18.3105	-13.4277	-7.32422	-14.6484	-9.76562
68.5	-34.79	-20.752	-21.3623	-13.4277	-10.376	-6.10352	-22.583	-14.0381	-15.8691	-14.6484	-8.54492	-13.4277	-11.5967
68.6	-36.6211	-21.3623	-11.5967	-16.4795	-12.8174	-9.15527	-7.32422	-14.6484	-17.7002	-18.3105	-14.6484	-18.3105	-6.71387
68.7	-36.0107	-21.3623	-9.15527	-15.8691	-13.4277	-16.4795	-7.32422	-13.4277	-17.7002	-15.2588	-12.207	-12.207	-11.5967
68.8	-42.7246	-23.1934	-17.7002	-21.3623	-11.5967	-4.88281	-12.8174	-14.6484	-18.3105	-9.76562	-10.9863	-10.9863	-11.5967
68.9	-39.0625	-20.752	-15.2588	-17.7002	-15.8691	-7.32422	-7.32422	-12.8174	-20.752	-11.5967	-10.376	-11.5967	-12.8174
69	-34.79	-23.8037	-19.5312	-18.9209	-10.9863	-12.207	-17.7002	-12.207	-12.8174	-12.207	-11.5967	-17.7002	-14.0381
69.1	-38.4521	-25.0244	-21.3623	-12.8174	-14.6484	-8.54492	-13.4277	-13.4277	-17.0898	-17.0898	-12.8174	-16.4795	-14.6484
69.2	-36.0107	-25.0244	-16.4795	-24.4141	-13.4277	-13.4277	-15.8691	-9.15527	-13.4277	-10.9863	-10.9863	-12.8174	-13.4277
69.3	-34.79	-20.752	-14.0381	-18.9209	-8.54492	-7.93457	-11.5967	-14.0381	-17.7002	-10.376	-8.54492	-15.2588	-7.32422
69.4	-38.4521	-21.9727	-22.583	-17.7002	-11.5967	-9.15527	-10.9863	-12.207	-14.6484	-16.4795	-12.8174	-10.9863	-13.4277
69.5	-43.335	-23.8037	-20.752	-12.207	-15.8691	-6.10352	-16.4795	-12.8174	-23.1934	-15.2588	-13.4277	-15.2588	-9.15527
69.6	-32.3486	-22.583	-17.0898	-14.6484	-18.9209	-15.8691	-17.0898	-6.10352	-15.2588	-9.76562	-7.93457	-15.8691	-17.0898
69.7	-35.4004	-25.6348	-18.9209	-15.8691	-12.8174	-9.15527	-9.76562	-9.15527	-9.15527	-11.5967	-17.0898	-15.8691	-18.3105
69.8	-46.3867	-20.752	-18.9209	-15.8691	-12.207	-7.32422	-7.93457	-10.376	-10.376	-16.4795	-10.376	-12.8174	-10.9863
69.9	-37.8418	-18.9209	-14.0381	-19.5312	-15.2588	-7.93457	-14.0381	-10.9863	-19.5312	-14.0381	-17.7002	-16.4795	-6.10352
70	-36.0107	-20.1416	-14.6484	-21.9727	-14.6484	-10.9863	-14.6484	-11.5967	-14.0381	-15.2588	-6.10352	-20.1416	-12.207
70.1	-36.6211	-20.1416	-18.3105	-19.5312	-13.4277	-7.93457	-14.6484	-14.6484	-14.0381	-10.376	-9.76562	-12.207	-13.4277
70.2	-37.2314	-28.0762	-18.3105	-13.4277	-8.54492	-12.8174	-8.54492	-12.8174	-18.3105	-14.0381	-14.6484	-12.207	-20.1416
70.3	-42.1143	-22.583	-18.9209	-18.3105	-11.5967	-10.9863	-7.32422	-10.376	-10.9863	-12.8174	-12.8174	-14.0381	-10.9863
70.4	-37.8418	-20.752	-16.4795	-14.6484	-11.5967	-9.15527	-13.4277	-10.376	-13.4277	-12.8174	-12.207	-12.207	-14.0381
70.5	-37.2314	-21.9727	-15.8691	-14.6484	-15.2588	-8.54492	-15.8691	-9.15527	-14.6484	-15.2588	-8.54492	-11.5967	-10.9863
70.6	-34.79	-21.9727	-18.9209	-18.3105	-14.6484	-14.0381	-16.4795	-6.10352	-16.4795	-10.376	-10.376	-13.4277	-9.15527
70.7	-32.3486	-26.8555	-13.4277	-18.9209	-15.8691	-7.32422	-14.0381	-12.8174	-17.7002	-10.376	-12.8174	-21.3623	-13.4277
70.8	-29.9072	-21.3623	-12.8174	-15.8691	-10.376	-12.8174	-15.8691	-10.9863	-16.4795	-10.376	-14.0381	-10.376	-15.8691
70.9	-35.4004	-21.3623	-17.7002	-12.207	-5.49316	-9.15527	-7.32422	-11.5967	-17.7002	-15.8691	-12.207	-14.6484	-16.4795
71	-37.8418	-24.4141	-22.583	-16.4795	-18.3105	-10.376	-14.6484	-14.6484	-12.8174	-14.0381	-12.207	-15.8691	-15.8691
71.1	-32.959	-22.583	-20.752	-21.3623	-7.93457	-9.76562	-14.6484	-12.8174	-13.4277	-15.2588	-13.4277	-15.8691	-10.376
71.2	-40.2832	-25.0244	-15.8691	-17.7002	-18.9209	-14.0381	-13.4277	-9.15527	-17.0898	-12.8174	-9.76562	-13.4277	-14.0381
71.3	-33.5693	-23.1934	-21.9727	-15.8691	-13.4277	-9.76562	-10.376	-14.6484	-7.32422	-14.6484	-12.8174	-17.0898	-12.207
71.4	-31.7383	-18.3105	-22.583	-18.9209	-17.0898	-7.93457	-10.9863	-17.0898	-12.8174	-8.54492	-10.376	-9.76562	-7.32422
71.5	-37.2314	-22.583	-19.5312	-18.9209	-14.0381	-6.71387	-7.93457	-11.5967	-16.4795	-14.6484	-14.6484	-15.8691	-11.5967
71.6	-30.5176	-25.6348	-15.2588	-18.3105	-17.7002	-14.0381	-15.8691	-15.8691	-14.6484	-12.8174	-10.376	-14.0381	-11.5967
71.7	-35.4004	-25.0244	-12.207	-14.6484	-10.9863	-11.5967	-9.76562	-13.4277	-13.4277	-6.10352	-14.6484	-18.9209	-5.49316
71.8	-35.4004	-20.752	-25.0244	-17.0898	-15.8691	-10.376	-14.0381	-12.8174	-17.0898	-15.2588	-16.4795	-14.0381	-9.76562
71.9	-41.5039	-21.9727	-20.1416	-14.0381	-10.376	-9.15527	-17.0898	-9.15527	-14.6484	-12.207	-15.8691	-19.5312	-12.207
72	-39.6729	-22.583	-19.5312	-20.1416	-13.4277	-15.2588	-15.8691	-9.76562	-16.4795	-10.376	-14.6484	-9.15527	-12.207
72.1	-30.5176	-22.583	-20.1416	-17.0898	-13.4277	-10.376	-13.4277	-9.76562	-13.4277	-17.0898	-15.8691	-15.2588	-13.4277
72.2	-29.2969	-19.5312	-10.376	-18.3105	-11.5967	-12.207	-12.207	-15.8691	-15.2588	-4.88281	-10.376	-10.9863	-10.9863
72.3	-31.1279	-26.8555	-20.1416	-15.8691	-17.0898	-8.54492	-15.8691	-12.8174	-14.0381	-14.0381	-12.207	-15.8691	-15.8691
72.4	-41.5039	-23.1934	-19.5312	-20.1416	-9.15527	-12.8174	-9.76562	-8.54492	-15.8691	-14.6484	-8.54492	-13.4277	-14.6484
72.5	-31.1279	-20.752	-21.9727	-23.1934	-12.8174	-9.76562	-12.8174	-9.15527	-10.376	-12.8174	-14.6484	-13.4277	-9.15527
72.6	-34.1797	-19.5312	-14.6484	-22.583	-11.5967	-7.93457	-9.15527	-15.2588	-21.9727	-8.54492	-12.207	-14.6484	-17.0898
72.7	-37.2314	-20.1416	-18.3105	-15.2588	-15.8691	-11.5967	-15.2588	-9.15527	-10.9863	-18.9209	-9.76562	-17.0898	-8.54492
72.8	-32.959	-20.1416	-24.4141	-21.3623	-15.2588	-11.5967	-12.8174	-10.9863	-15.8691	-15.8691	-10.9863	-14.6484	-17.0898
72.9	-38.4521	-21.9727	-20.1416	-18.9209	-12.8174	-12.207	-10.376	-12.8174	-10.9863	-9.15527	-12.8174	-9.15527	-21.3623
73	-33.5693	-17.0898	-20.1416	-15.8691	-16.4795	-9.15527	-20.752	-12.8174	-14.0381	-15.2588	-8.54492	-18.3105	-13.4277
73.1	-33.5693	-17.0898	-15.8691	-17.0898	-7.93457	-12.207	-10.9863	-10.376	-8.54492	-12.207	-12.8174	-15.8691	-5.49316
73.2	-32.3486	-23.8037	-17.7002	-15.2588	-10.376	-8.54492	-12.8174	-5.49316	-15.8691	-14.0381	-8.54492	-16.4795	-11.5967
73.3	-37.8418	-21.3623	-20.752	-15.2588	-18.3105	-18.3105	-14.6484	-12.207	-14.0381	-12.8174	-12.207	-13.4277	-10.376
73.4	-36.6211	-20.1416	-21.3623	-21.3623	-12.8174	-14.6484	-7.93457	-15.2588	-17.7002	-14.6484	-11.5967	-10.9863	-7.32422
73.5	-34.79	-17.7002	-22.583	-12.8174	-19.5312	-12.207	-12.8174	-9.76562	-12.8174	-12.207	-20.1416	-13.4277	-6.10352
73.6	-36.0107	-16.4795	-15.2588	-14.6484	-10.9863	-10.376	-4.88281	-17.0898	-12.207	-6.71387	-12.8174	-12.207	-14.0381
73.7	-34.79	-19.5312	-19.5312	-18.3105	-14.6484	-17.7002	-14.6484	-11.5967	-8.54492	-12.8174	-10.9863	-15.2588	-9.76562
73.8	-34.79	-26.2451	-20.752	-17.7002	-14.6484	-12.8174	-11.5967	-10.9863	-17.0898	-14.0381	-10.9863	-12.8174	-12.207
73.9	-40.2832	-23.1934	-21.3623	-12.207	-14.0381	-13.4277	-12.207	-11.5967	-14.6484	-10.9863	-8.54492	-8.54492	-12.8174
74	-39.6729	-21.9727	-19.5312	-16.4795	-11.5967	-12.8174	-15.2588	-9.76562	-15.2588	-18.3105	-11.5967	-12.8174	-9.76562
74.1	-31.1279	-20.752	-18.3105	-10.9863	-13.4277	-9.76562	-9.76562	-9.15527	-15.2588	-7.93457	-14.0381	-10.9863	-6.71387
74.2	-36.0107	-26.2451	-18.3105	-18.3105	-10.9863	-10.376	-14.0381	-9.15527	-9.76562	-10.9863	-13.4277	-18.3105	-16.4795
74.3	-34.79	-21.3623	-15.8691	-20.1416	-10.9863	-7.93457	-14.0381	-10.376	-13.4277	-12.8174	-16.4795	-15.2588	-8.54492
74.4	-32.3486	-19.5312	-17.0898	-20.752	-14.0381	-14.6484	-13.4277	-12.207	-10.376	-7.93457	-14.6484	-14.0381	-12.207
74.5	-34.1797	-16.4795	-21.3623	-17.0898	-9.76562	-12.8174	-9.76562	-14.6484	-12.8174	-10.376	-15.2588	-10.376	-9.15527
74.6	-31.1279	-26.2451	-23.8037	-14.6484	-12.207	-13.4277	-12.207	-10.9863	-13.4277	-10.9863	-8.54492	-14.6484	-10.376
74.7	-35.4004	-21.9727	-18.9209	-14.0381	-10.376	-16.4795	-7.93457	-7.93457	-11.5967	-15.8691	-15.8691	-17.7002	-9.76562
74.8	-36.0107	-28.0762	-18.9209	-18.3105	-12.8174	-15.8691	-10.9863	-14.0381	-13.4277	-10.9863	-9.15527	-18.3105	-15.8691
74.9	-36.6211	-17.0898	-25.0244	-22.583	-10.9863	-10.9863	-9.15527	-10.9863	-17.0898	-12.207	-12.8174	-12.8174	-9.76562
75	-36.0107	-18.3105	-16.4795	-21.3623	-14.6484	-4.27246	-16.4795	-12.207	-10.9863	-14.0381	-18.3105	-12.207	-14.6484
75.1	-34.1797	-26.8555	-23.1934	-14.0381	-10.376	-12.207	-11.5967	-9.15527	-11.5967	-16.4795	-8.54492	-14.0381	-12.8174
75.2	-36.0107	-22.583	-17.0898	-18.3105	-9.76562	-18.9209	-12.8174	-9.76562	-17.0898	-15.2588	-16.4795	-14.0381	-10.376
75.3	-33.5693	-15.8691	-18.9209	-14.6484	-9.76562	-10.376	-7.32422	-12.207	-17.7002	-12.207	-12.8174	-12.207	-10.376
75.4	-35.4004	-22.583	-20.752	-15.8691	-7.93457	-15.8691	-9.15527	-15.8691	-17.0898	-13.4277	-9.15527	-9.15527	-15.8691
75.5	-37.2314	-21.3623	-24.4141	-12.8174	-10.376	-6.71387	-12.207	-4.27246	-6.10352	-7.32422	-12.8174	-9.15527	-9.15527
75.6	-37.8418	-28.0762	-18.3105	-18.3105	-12.207	-13.4277	-17.0898	-9.76562	-4.88281	-16.4795	-10.376	-16.4795	-7.32422
75.7	-34.1797	-18.9209	-19.5312	-15.2588	-14.6484	-3.66211	-10.9863	-10.9863	-18.3105	-15.8691	-9.76562	-18.3105	-14.0381
75.8	-33.5693	-18.3105	-22.583	-12.8174	-9.76562	-10.376	-12.207	-10.376	-16.4795	-13.4277	-10.376	-16.4795	-14.0381
75.9	-39.0625	-21.3623	-18.3105	-12.207	-16.4795	-12.8174	-13.4277	-9.15527	-17.0898	-19.5312	-16.4795	-16.4795	-10.9863
76	-31.7383	-18.3105	-20.752	-16.4795	-12.207	-7.93457	-13.4277	-7.32422	-14.6484	-14.0381	-16.4795	-3.05176	-14.6484
76.1	-36.6211	-19.5312	-15.2588	-12.8174	-10.9863	-14.0381	-14.0381	-9.76562	-14.6484	-12.207	-10.9863	-15.8691	-3.66211
76.2	-35.4004	-24.4141	-17.0898	-15.2588	-13.4277	-6.10352	-9.15527	-15.8691	-12.207	-10.9863	-14.0381	-17.0898	-12.207
76.3	-36.6211	-20.752	-20.1416	-15.2588	-15.8691	-15.8691	-10.9863	-10.9863	-12.207	-16.4795	-14.6484	-14.6484	-8.54492
76.4	-30.5176	-20.1416	-18.3105	-17.7002	-11.5967	-12.8174	-12.8174	-13.4277	-11.5967	-14.0381	-11.5967	-12.8174	-12.8174
76.5	-39.0625	-17.0898	-14.0381	-18.3105	-11.5967	-12.207	-16.4795	-11.5967	-12.8174	-15.8691	-13.4277	-10.9863	-15.2588
76.6	-38.4521	-25.6348	-14.6484	-7.93457	-9.76562	-10.376	-11.5967	-8.54492	-14.0381	-14.6484	-12.207	-12.8174	-9.15527
76.7	-34.1797	-25.6348	-18.3105	-18.3105	-5.49316	-12.8174	-9.76562	-7.32422	-14.6484	-17.0898	-9.76562	-14.6484	-15.2588
76.8	-32.959	-25.0244	-15.2588	-21.9727	-12.8174	-12.8174	-8.54492	-10.9863	-15.8691	-14.6484	-14.0381	-15.2588	-13.4277
76.9	-35.4004	-25.0244	-15.8691	-20.1416	-13.4277	-13.4277	-8.54492	-10.9863	-12.207	-9.76562	-13.4277	-10.376	-10.376
77	-37.8418	-28.6865	-25.6348	-17.0898	-10.376	-12.207	-10.376	-10.9863	-9.15527	-14.6484	-18.9209	-19.5312	-12.8174
77.1	-36.0107	-25.6348	-16.4795	-17.7002	-9.76562	-6.10352	-14.0381	-9.15527	-12.8174	-12.207	-12.207	-13.4277	-9.76562
77.2	-35.4004	-20.752	-17.7002	-16.4795	-12.8174	-12.207	-9.15527	-11.5967	-16.4795	-16.4795	-17.0898	-13.4277	-13.4277
77.3	-35.4004	-18.3105	-16.4795	-18.3105	-12.207	-14.0381	-7.93457	-9.76562	-9.76562	-14.6484	-20.752	-17.0898	-13.4277
77.4	-34.1797	-21.3623	-23.1934	-21.9727	-11.5967	-15.2588	-7.93457	-10.9863	-12.8174	-9.76562	-7.32422	-12.8174	-12.8174
77.5	-37.2314	-22.583	-25.0244	-14.6484	-12.207	-14.6484	-10.9863	-14.0381	-12.207	-9.76562	-11.5967	-14.6484	-8.54492
77.6	-28.6865	-22.583	-18.3105	-12.207	-10.9863	-15.2588	-10.376	-12.8174	-12.8174	-20.752	-13.4277	-11.5967	-15.2588
77.7	-30.5176	-23.1934	-21.9727	-14.6484	-15.2588	-10.376	-11.5967	-8.54492	-9.15527	-9.76562	-7.32422	-14.0381	-10.376
77.8	-39.6729	-18.9209	-14.6484	-15.8691	-13.4277	-13.4277	-14.0381	-16.4795	-10.9863	-14.0381	-12.8174	-10.9863	-13.4277
77.9	-36.6211	-31.1279	-18.9209	-17.7002	-7.32422	-8.54492	-10.376	-8.54492	-10.9863	-15.2588	-10.9863	-19.5312	-10.376
78	-39.6729	-22.583	-17.7002	-18.3105	-10.376	-10.9863	-13.4277	-6.10352	-12.207	-12.207	-10.376	-8.54492	-10.376
78.1	-38.4521	-25.6348	-17.0898	-13.4277	-18.3105	-8.54492	-13.4277	-12.207	-9.15527	-14.0381	-16.4795	-15.2588	-16.4795
78.2	-39.0625	-20.1416	-17.0898	-14.0381	-18.9209	-11.5967	-15.8691	-9.15527	-11.5967	-7.93457	-16.4795	-14.6484	-15.2588
78.3	-37.8418	-23.8037	-21.9727	-12.8174	-12.8174	-12.8174	-14.0381	-12.207	-17.0898	-10.9863	-11.5967	-11.5967	-9.76562
78.4	-39.0625	-20.752	-18.3105	-13.4277	-10.9863	-11.5967	-11.5967	-10.9863	-9.15527	-15.8691	-9.76562	-9.15527	-13.4277
78.5	-39.6729	-24.4141	-15.2588	-16.4795	-10.376	-11.5967	-11.5967	-7.32422	-9.15527	-15.2588	-12.8174	-15.2588	-11.5967
78.6	-33.5693	-19.5312	-15.8691	-9.76562	-10.376	-13.4277	-16.4795	-14.6484	-15.2588	-17.7002	-13.4277	-12.8174	-11.5967
78.7	-37.2314	-25.0244	-12.207	-17.7002	-10.376	-14.0381	-8.54492	-10.9863	-10.376	-13.4277	-14.0381	-9.15527	-10.9863
78.8	-34.79	-26.2451	-17.0898	-17.0898	-8.54492	-9.76562	-10.376	-12.207	-7.32422	-15.2588	-4.88281	-13.4277	-13.4277
78.9	-33.5693	-24.4141	-16.4795	-19.5312	-12.207	-15.2588	-16.4795	-9.15527	-15.8691	-16.4795	-15.8691	-9.15527	-12.8174
79	-34.79	-23.8037	-18.3105	-12.207	-15.2588	-13.4277	-14.0381	-13.4277	-12.207	-21.3623	-14.0381	-11.5967	-12.207
79.1	-33.5693	-20.1416	-18.3105	-13.4277	-7.93457	-4.88281	-12.207	-7.93457	-12.207	-10.9863	-9.76562	-17.0898	-10.376
79.2	-33.5693	-26.2451	-15.8691	-24.4141	-14.6484	-7.93457	-14.0381	-10.9863	-9.15527	-12.207	-14.6484	-15.2588	-6.71387
79.3	-31.1279	-18.9209	-18.9209	-21.9727	-10.9863	-12.8174	-13.4277	-14.6484	-15.2588	-12.207	-12.207	-14.6484	-14.0381
79.4	-39.0625	-20.752	-16.4795	-18.3105	-15.2588	-13.4277	-11.5967	-16.4795	-10.376	-19.5312	-14.6484	-14.6484	-13.4277
79.5	-30.5176	-23.1934	-15.2588	-20.752	-7.93457	-10.376	-12.207	-12.8174	-16.4795	-17.7002	-14.0381	-12.8174	-13.4277
79.6	-34.1797	-25.0244	-11.5967	-12.8174	-18.3105	-7.32422	-9.76562	-13.4277	-19.5312	-20.1416	-12.8174	-18.3105	-12.8174
79.7	-33.5693	-26.8555	-18.9209	-20.752	-10.9863	-11.5967	-10.376	-12.8174	-12.8174	-7.32422	-9.76562	-10.376	-7.93457
79.8	-36.6211	-23.8037	-17.0898	-15.8691	-7.32422	-9.76562	-14.6484	-11.5967	-10.9863	-15.2588	-18.3105	-15.8691	-7.32422
79.9	-34.79	-21.3623	-22.583	-13.4277	-12.207	-14.6484	-12.8174	-10.376	-12.8174	-10.376	-12.8174	-14.0381	-17.0898
80	-35.4004	-23.8037	-21.3623	-21.3623	-15.2588	-13.4277	-11.5967	-11.5967	-17.0898	-10.376	-9.15527	-12.207	-12.207
80.1	-35.4004	-24.4141	-20.1416	-16.4795	-10.376	-10.376	-14.0381	-7.32422	-15.2588	-11.5967	-15.8691	-11.5967	-12.8174
80.2	-39.0625	43.9453	85.4492	165.405	247.803	602.417	629.883	867.31	1329.35	1408.08	1757.2	1956.79	2199.1
80.3	-37.8418	13.4277	30.5176	74.4629	115.967	326.538	340.576	346.68	590.21	600.586	775.146	869.751	1004.64
80.4	-36.6211	-3.05176	13.4277	30.5176	46.9971	144.653	152.588	156.25	239.258	252.686	329.59	348.511	411.987
80.5	-39.0625	-10.376	1.83105	20.1416	21.9727	42.1143	54.9316	53.7109	62.2559	65.918	101.318	87.8906	106.201
80.6	-37.8418	-18.3105	0.610352	10.376	7.93457	-9.15527	3.66211	10.376	-34.1797	-31.7383	-28.6865	-80.5664	-104.37
80.7	-32.959	-18.3105	4.88281	6.10352	0	-34.1797	-17.7002	-18.3105	-80.5664	-83.0078	-108.032	-192.261	-247.192
80.8	-36.6211	-22.583	-3.05176	6.10352	0	-36.6211	-8.54492	-17.7002	-103.149	-133.057	-185.547	-307.007	-355.225
80.9	-38.4521	-14.6484	-4.88281	3.66211	1.2207	-36.6211	-17.7002	-21.9727	-128.174	-180.664	-263.672	-383.911	-403.442
81	-31.7383	-17.0898	-4.27246	15.2588	-0.610352	-33.5693	-13.4277	-31.7383	-160.522	-236.206	-349.121	-440.674	-415.649
81.1	-28.6865	-26.8555	-2.44141	5.49316	7.93457	-24.4141	-21.3623	-39.0625	-190.43	-293.579	-404.663	-445.557	-382.08
81.2	-32.959	-18.3105	1.2207	11.5967	3.66211	-14.0381	-21.9727	-47.6074	-239.258	-351.562	-432.739	-418.701	-337.524
81.3	-36.0107	-20.752	-1.2207	7.32422	10.376	-10.9863	-19.5312	-70.8008	-277.1	-401.001	-433.96	-374.756	-279.541
81.4	-34.79	-18.3105	0.610352	5.49316	10.9863	-6.10352	-21.3623	-93.9941	-308.838	-422.363	-419.312	-330.2	-228.882
81.5	-32.959	-14.6484	2.44141	7.32422	9.15527	-0.610352	-26.8555	-116.577	-342.407	-440.674	-391.846	-277.71	-175.171
81.6	-32.959	-14.6484	-1.2207	6.10352	9.15527	0.610352	-28.6865	-136.108	-375.366	-433.96	-344.238	-225.83	-134.277
81.7	-33.5693	-18.3105	0	9.76562	16.4795	6.10352	-36.6211	-162.964	-386.963	-421.143	-303.345	-186.157	-100.098
81.8	-33.5693	-13.4277	-3.05176	4.88281	12.207	4.27246	-43.9453	-180.664	-390.015	-382.69	-264.282	-142.822	-64.0869
81.9	-36.6211	-16.4795	-4.27246	10.376	14.0381	7.93457	-45.7764	-197.754	-389.404	-362.549	-219.116	-110.474	-41.5039
82	-28.6865	-19.5312	-4.88281	7.93457	14.0381	6.71387	-46.9971	-211.792	-371.094	-331.421	-188.599	-85.4492	-26.2451
82.1	-31.7383	-12.8174	-4.88281	4.88281	12.8174	7.32422	-53.1006	-228.882	-360.718	-296.631	-154.419	-61.6455	-10.9863
82.2	-34.79	-14.0381	-1.2207	7.32422	14.0381	6.71387	-53.7109	-239.868	-343.628	-264.893	-133.667	-49.4385	3.66211
82.3	-37.2314	-17.7002	-2.44141	7.32422	7.32422	4.88281	-61.0352	-249.023	-321.655	-235.596	-103.76	-33.5693	6.10352
82.4	-32.959	-9.76562	0	3.05176	10.9863	3.66211	-62.8662	-256.348	-307.617	-204.468	-89.7217	-25.6348	12.8174
82.5	-32.3486	-10.376	-4.88281	0.610352	9.15527	-0.610352	-68.9697	-250.854	-284.424	-186.157	-68.3594	-14.0381	12.8174
82.6	-39.0625	-16.4795	0.610352	4.27246	6.10352	2.44141	-73.2422	-255.737	-274.048	-162.964	-57.373	-11.5967	21.3623
82.7	-37.8418	-10.376	-5.49316	9.15527	8.54492	-1.83105	-79.9561	-255.127	-251.465	-136.108	-51.2695	-9.15527	14.6484
82.8	-32.3486	-17.0898	-1.83105	0.610352	2.44141	-7.32422	-86.6699	-244.141	-236.206	-120.239	-36.6211	-0.610352	23.8037
82.9	-29.2969	-15.2588	-1.83105	1.83105	6.10352	-7.32422	-83.6182	-243.53	-213.013	-109.253	-37.2314	1.2207	25.0244
83	-32.959	-16.4795	-6.10352	5.49316	9.15527	-9.76562	-83.0078	-232.544	-203.857	-92.1631	-28.0762	10.9863	24.4141
83.1	-31.7383	-16.4795	-3.05176	2.44141	4.88281	0	-95.2148	-229.492	-189.819	-81.1768	-23.1934	3.66211	19.5312
83.2	-30.5176	-21.9727	-2.44141	-3.05176	-1.83105	-9.76562	-91.5527	-221.558	-171.509	-65.3076	-17.7002	7.93457	21.9727
83.3	-37.2314	-11.5967	-6.10352	-1.2207	5.49316	-9.76562	-86.0596	-209.961	-170.288	-62.8662	-22.583	2.44141	16.4795
83.4	-37.8418	-17.7002	-2.44141	6.10352	4.27246	-12.8174	-85.4492	-201.416	-150.757	-59.8145	-12.207	5.49316	17.7002
83.5	-32.3486	-14.6484	-4.88281	1.2207	6.71387	-7.32422	-92.1631	-190.43	-139.16	-53.7109	-18.3105	1.83105	21.9727
83.6	-32.959	-16.4795	-4.27246	6.10352	0	-14.0381	-93.9941	-188.599	-123.901	-49.4385	-17.0898	10.9863	19.5312
83.7	-36.6211	-19.5312	-10.376	-1.83105	0	-11.5967	-101.929	-184.937	-113.525	-52.4902	-15.2588	7.32422	23.1934
83.8	-37.2314	-14.6484	-4.88281	-0.610352	3.66211	-7.93457	-96.4355	-166.626	-108.643	-46.3867	-9.76562	7.93457	23.8037
83.9	-32.3486	-15.2588	-4.88281	-6.10352	7.32422	-12.207	-95.8252	-157.471	-103.149	-39.6729	-8.54492	3.05176	21.9727
84	-34.79	-13.4277	-6.10352	-5.49316	3.66211	-12.8174	-95.8252	-152.588	-97.6562	-40.2832	-12.207	5.49316	15.8691
84.1	-35.4004	-13.4277	-8.54492	-3.66211	2.44141	-10.376	-97.6562	-153.198	-95.2148	-42.7246	-14.0381	10.376	20.752
84.2	-41.5039	-17.0898	-9.15527	-2.44141	3.05176	-10.376	-90.332	-154.419	-89.1113	-32.959	-10.376	8.54492	13.4277
84.3	-34.79	-14.0381	-7.32422	-0.610352	0.610352	-10.376	-89.1113	-144.043	-79.3457	-29.9072	-10.376	6.10352	21.9727
84.4	-39.6729	-16.4795	-10.376	0	-0.610352	-11.5967	-81.7871	-130.615	-79.3457	-32.3486	-8.54492	7.93457	18.3105
84.5	-31.7383	-12.207	-6.10352	-1.83105	0	-17.0898	-90.332	-123.291	-79.3457	-26.8555	-9.76562	7.93457	18.3105
84.6	-36.0107	-7.93457	-6.71387	-0.610352	-6.10352	-19.5312	-86.6699	-128.784	-75.0732	-23.1934	-17.7002	4.27246	16.4795
84.7	-39.0625	-14.6484	-4.88281	-0.610352	-2.44141	-15.2588	-86.6699	-118.408	-68.3594	-18.3105	-9.76562	6.10352	12.207
84.8	-32.3486	-13.4277	-2.44141	-1.83105	2.44141	-15.2588	-83.6182	-119.019	-68.3594	-18.3105	-8.54492	1.2207	17.7002
84.9	-28.6865	-16.4795	-3.66211	-1.83105	-11.5967	-11.5967	-83.0078	-113.525	-61.6455	-20.752	-12.207	3.66211	14.6484
85	-36.6211	-17.0898	0	0.610352	-3.05176	-14.0381	-83.6182	-108.643	-65.3076	-20.1416	-9.15527	7.32422	12.8174
85.1	-32.3486	-11.5967	-9.76562	-7.32422	-7.32422	-17.0898	-81.7871	-108.032	-59.8145	-19.5312	-7.93457	6.10352	20.752
85.2	-28.6865	-13.4277	-9.15527	-3.05176	-4.88281	-12.207	-77.5146	-100.098	-65.918	-16.4795	-12.8174	14.6484	21.3623
85.3	-36.0107	-10.9863	-10.376	-7.32422	-8.54492	-17.7002	-70.8008	-86.6699	-57.9834	-21.3623	-11.5967	4.27246	19.5312
85.4	-27.4658	-13.4277	-3.05176	0	-7.32422	-18.3105	-72.0215	-92.7734	-55.542	-16.4795	-3.66211	6.10352	17.0898
85.5	-35.4004	-15.2588	-8.54492	-0.610352	-7.93457	-11.5967	-67.749	-93.3838	-54.9316	-18.9209	-5.49316	6.10352	12.207
85.6	-33.5693	-17.7002	-5.49316	-1.2207	-9.76562	-14.0381	-73.2422	-95.2148	-50.6592	-19.5312	-2.44141	8.54492	11.5967
85.7	-34.1797	-18.3105	-8.54492	2.44141	-5.49316	-8.54492	-73.2422	-90.332	-48.8281	-17.0898	-10.9863	6.10352	12.207
85.8	-31.7383	-10.9863	-3.05176	-7.32422	-9.15527	-17.0898	-71.4111	-90.332	-49.4385	-23.8037	-14.0381	4.88281	15.8691
85.9	-37.2314	-19.5312	-5.49316	-0.610352	-2.44141	-20.1416	-68.3594	-86.6699	-50.6592	-18.9209	-4.88281	2.44141	11.5967
86	-36.0107	-17.7002	-12.207	-7.32422	-7.32422	-16.4795	-72.6318	-85.4492	-43.9453	-12.207	-6.10352	5.49316	7.32422
86.1	-35.4004	-14.6484	-7.93457	-4.88281	-3.05176	-19.5312	-72.6318	-90.9424	-50.0488	-18.9209	-7.93457	1.2207	11.5967
86.2	-28.6865	-14.6484	-9.15527	-6.10352	-7.93457	-25.0244	-75.6836	-81.7871	-49.4385	-16.4795	-6.10352	2.44141	13.4277
86.3	-30.5176	-9.15527	-9.76562	-4.88281	-7.93457	-20.752	-70.1904	-81.7871	-44.5557	-20.1416	-6.10352	-0.610352	10.376
86.4	-40.8936	-12.8174	-8.54492	-6.71387	-7.32422	-17.7002	-73.2422	-75.6836	-37.8418	-16.4795	1.2207	1.83105	12.207
86.5	-34.1797	-11.5967	-7.32422	-6.10352	-7.32422	-19.5312	-68.9697	-79.3457	-45.166	-18.3105	-4.88281	0	10.376
86.6	-33.5693	-15.2588	-8.54492	-3.05176	-10.376	-21.3623	-66.5283	-74.4629	-36.6211	-13.4277	0	2.44141	10.376
86.7	-36.6211	-15.2588	-10.9863	-11.5967	-4.88281	-25.6348	-65.3076	-75.6836	-39.6729	-13.4277	-0.610352	6.71387	15.8691
86.8	-39.0625	-16.4795	-7.93457	-4.27246	-7.93457	-20.752	-65.918	-69.5801	-36.6211	-15.2588	1.83105	7.93457	19.5312
86.9	-31.7383	-10.9863	-4.27246	-3.66211	-6.10352	-18.9209	-65.918	-73.2422	-33.5693	-13.4277	-1.2207	3.05176	9.15527
87	-32.3486	-15.2588	-9.15527	-7.93457	-5.49316	-18.9209	-70.8008	-73.8525	-31.1279	-11.5967	-7.32422	1.83105	3.05176
87.1	-39.6729	-14.0381	-4.88281	-10.376	-8.54492	-15.2588	-62.2559	-65.918	-28.6865	-12.8174	-5.49316	9.76562	13.4277
87.2	-36.0107	-18.9209	-4.88281	-2.44141	-11.5967	-18.9209	-67.1387	-70.1904	-34.79	-11.5967	-3.05176	7.32422	10.9863
87.3	-29.2969	-14.6484	-5.49316	-4.27246	-8.54492	-18.9209	-72.6318	-70.8008	-32.959	-14.6484	-7.93457	3.66211	9.76562
87.4	-34.1797	-18.3105	-10.9863	-4.27246	-6.10352	-24.4141	-70.1904	-63.4766	-31.7383	-12.207	0	0.610352	13.4277
87.5	-36.0107	-17.0898	-14.6484	-7.32422	-13.4277	-18.3105	-68.9697	-68.9697	-32.959	-10.9863	-4.27246	3.05176	13.4277
87.6	-31.1279	-20.1416	-10.376	-4.88281	-9.76562	-23.1934	-65.918	-62.2559	-36.0107	-15.8691	-3.05176	11.5967	9.15527
87.7	-33.5693	-17.0898	-7.32422	-6.10352	-7.32422	-24.4141	-68.3594	-67.1387	-31.1279	-14.0381	-7.32422	1.83105	5.49316
87.8	-29.9072	-17.0898	-7.93457	-2.44141	-10.376	-22.583	-75.0732	-67.749	-28.6865	-12.8174	-7.93457	-0.610352	9.76562
87.9	-31.7383	-20.1416	-14.6484	-5.49316	-15.2588	-22.583	-67.1387	-66.5283	-28.6865	-14.0381	-1.83105	3.05176	14.6484
88	-38.4521	-14.0381	-10.9863	-4.88281	-5.49316	-24.4141	-70.8008	-59.8145	-36.6211	-14.0381	0	6.71387	10.376
88.1	-36.6211	-12.207	-7.93457	-3.05176	-6.10352	-26.8555	-69.5801	-61.0352	-32.3486	-16.4795	-2.44141	4.88281	10.376
88.2	-36.0107	-15.8691	-8.54492	-8.54492	-6.10352	-24.4141	-64.6973	-61.6455	-26.8555	-17.0898	-9.76562	1.83105	14.6484
88.3	-31.7383	-17.7002	-9.15527	-14.6484	-11.5967	-31.1279	-63.4766	-57.9834	-33.5693	-21.9727	-6.71387	7.32422	14.0381
88.4	-34.1797	-18.9209	-7.32422	-9.15527	-15.2588	-26.2451	-64.6973	-56.7627	-32.959	-7.93457	-7.93457	4.88281	10.376
88.5	-35.4004	-21.3623	-14.0381	-3.66211	-7.93457	-25.6348	-60.4248	-61.0352	-20.752	-10.376	-7.32422	5.49316	18.3105
88.6	-34.1797	-21.9727	-12.207	-8.54492	-13.4277	-29.9072	-60.4248	-57.373	-28.0762	-14.6484	-11.5967	6.10352	4.27246
88.7	-30.5176	-20.752	-10.9863	-9.76562	-7.93457	-23.1934	-61.6455	-57.9834	-29.2969	-12.8174	-12.207	4.88281	10.9863
88.8	-35.4004	-12.207	-13.4277	-8.54492	-10.9863	-22.583	-56.1523	-61.0352	-26.8555	-12.207	-11.5967	4.27246	12.207
88.9	-39.6729	-12.207	-13.4277	-3.66211	-13.4277	-21.3623	-59.8145	-56.1523	-33.5693	-12.207	-5.49316	8.54492	9.15527
89	-34.1797	-12.8174	-3.05176	-4.88281	-8.54492	-19.5312	-59.2041	-57.9834	-25.6348	-12.8174	-7.32422	4.27246	17.7002
89.1	-33.5693	-19.5312	-10.376	-4.88281	-16.4795	-18.3105	-55.542	-57.373	-23.8037	-14.0381	-1.83105	7.32422	10.376
89.2	-37.2314	-17.0898	-10.9863	-3.05176	-11.5967	-21.3623	-58.5938	-53.1006	-20.1416	-10.376	-7.93457	8.54492	6.10352
89.3	-36.6211	-16.4795	-7.93457	-12.207	-11.5967	-18.9209	-59.2041	-54.9316	-18.3105	-11.5967	-2.44141	3.66211	18.3105
89.4	-31.1279	-18.9209	-4.88281	0	-8.54492	-20.1416	-56.1523	-56.7627	-23.8037	-14.0381	-6.71387	10.376	15.8691
89.5	-38.4521	-12.207	-11.5967	-7.93457	-11.5967	-26.2451	-61.0352	-54.3213	-24.4141	-9.76562	-2.44141	1.83105	13.4277
89.6	-39.6729	-18.3105	-9.76562	-12.207	-12.207	-18.9209	-59.2041	-51.2695	-24.4141	-15.2588	-1.83105	5.49316	10.9863
89.7	-35.4004	-18.9209	-6.10352	-6.71387	-7.93457	-20.752	-58.5938	-48.8281	-21.9727	-11.5967	-1.83105	3.66211	3.66211
89.8	-32.3486	-19.5312	-12.207	-3.66211	-14.0381	-25.6348	-64.6973	-45.7764	-21.3623	-9.76562	-8.54492	10.9863	17.0898
89.9	-36.0107	-22.583	-9.76562	-7.93457	-6.71387	-23.1934	-61.6455	-43.335	-17.7002	-14.0381	-3.05176	5.49316	6.10352
90	-38.4521	-16.4795	-10.9863	-4.88281	-15.8691	-28.6865	-55.542	-42.1143	-18.3105	-10.376	-5.49316	-1.2207	7.32422
90.1	-43.335	-14.0381	-13.4277	-1.83105	-13.4277	-23.8037	-44.5557	-49.4385	-28.6865	-15.8691	-3.66211	9.15527	10.376
90.2	-37.2314	-18.9209	-8.54492	-12.8174	-17.7002	-20.752	-48.8281	-44.5557	-23.1934	-18.9209	-3.66211	4.27246	14.6484
90.3	-42.7246	-17.0898	-8.54492	-6.71387	-12.8174	-20.1416	-47.6074	-40.8936	-18.9209	-16.4795	-4.27246	4.88281	5.49316
90.4	-43.335	-17.7002	-12.207	-3.66211	-10.9863	-23.8037	-42.1143	-46.3867	-24.4141	-10.9863	-1.2207	4.88281	14.6484
90.5	-34.1797	-19.5312	-14.0381	-3.05176	-14.6484	-24.4141	-41.5039	-46.3867	-18.3105	-14.6484	-1.2207	3.05176	11.5967
90.6	-33.5693	-17.0898	-4.88281	-1.83105	-16.4795	-26.2451	-38.4521	-35.4004	-22.583	-13.4277	-1.83105	8.54492	14.0381
90.7	-37.8418	-26.2451	-12.207	-8.54492	-15.8691	-20.1416	-45.7764	-40.2832	-20.752	-7.32422	-10.376	5.49316	4.88281
90.8	-38.4521	-15.2588	-12.207	-2.44141	-14.6484	-23.8037	-40.2832	-39.6729	-25.6348	-8.54492	-3.05176	6.71387	8.54492
90.9	-39.6729	-17.7002	-10.9863	-11.5967	-19.5312	-21.3623	-41.5039	-36.0107	-17.7002	-12.207	-0.610352	5.49316	12.207
91	-36.0107	-20.1416	-4.27246	-5.49316	-13.4277	-20.1416	-42.7246	-36.0107	-23.1934	-11.5967	-4.88281	7.32422	12.207
91.1	-37.2314	-21.9727	-12.207	-7.93457	-10.376	-22.583	-44.5557	-39.0625	-29.2969	-10.9863	-3.66211	3.05176	7.93457
91.2	-41.5039	-15.8691	-5.49316	-6.10352	-13.4277	-19.5312	-42.1143	-42.1143	-22.583	-11.5967	0.610352	3.05176	10.376
91.3	-40.8936	-18.3105	-12.207	-5.49316	-4.88281	-20.752	-37.8418	-41.5039	-23.8037	-10.9863	-9.15527	3.66211	8.54492
91.4	-37.2314	-20.752	-12.8174	-6.71387	-14.0381	-22.583	-45.166	-43.9453	-20.752	-10.376	-5.49316	4.27246	6.71387
91.5	-39.6729	-17.0898	-8.54492	-9.15527	-10.9863	-21.9727	-46.9971	-39.6729	-23.1934	-6.10352	-1.2207	4.88281	9.76562
91.6	-32.3486	-16.4795	-10.9863	-0.610352	-18.9209	-23.8037	-48.8281	-37.8418	-17.0898	-12.207	-3.05176	4.27246	10.376
91.7	-36.6211	-17.7002	-7.93457	-8.54492	-16.4795	-25.6348	-46.3867	-37.2314	-17.0898	-8.54492	0.610352	8.54492	12.8174
91.8	-37.8418	-16.4795	-13.4277	-6.71387	-19.5312	-25.6348	-47.6074	-38.4521	-24.4141	-18.3105	-3.05176	-1.83105	12.207
91.9	-34.1797	-15.8691	-17.0898	-14.0381	-12.8174	-27.4658	-47.6074	-32.3486	-14.0381	-15.8691	-2.44141	7.32422	12.207
92	-34.1797	-14.0381	-12.8174	-6.71387	-15.8691	-24.4141	-48.2178	-31.7383	-15.8691	-9.76562	-3.66211	7.93457	14.0381
92.1	-31.1279	-19.5312	-9.15527	0.610352	-20.752	-20.1416	-46.9971	-35.4004	-20.752	-10.376	5.49316	7.93457	13.4277
92.2	-32.3486	-15.2588	-15.2588	-6.10352	-17.0898	-20.1416	-46.3867	-29.9072	-21.3623	-14.0381	-4.88281	8.54492	9.15527
92.3	-37.8418	-13.4277	-4.88281	-1.2207	-11.5967	-22.583	-44.5557	-31.1279	-20.752	-10.9863	4.88281	4.88281	15.8691
92.4	-31.7383	-15.8691	-13.4277	-10.376	-14.0381	-18.9209	-42.7246	-31.7383	-17.0898	-8.54492	0.610352	9.76562	11.5967
92.5	-34.79	-15.2588	-14.0381	-8.54492	-12.207	-22.583	-43.9453	-31.7383	-17.0898	-7.32422	-4.27246	4.88281	17.7002
92.6	-30.5176	-17.0898	-9.76562	-9.15527	-13.4277	-19.5312	-36.0107	-31.1279	-12.207	-5.49316	-0.610352	7.32422	4.88281
92.7	-36.6211	-12.8174	-12.8174	-6.10352	-9.76562	-25.0244	-45.166	-31.7383	-15.8691	-7.32422	4.88281	3.66211	12.207
92.8	-37.2314	-17.0898	-13.4277	-3.05176	-18.3105	-23.8037	-39.0625	-26.2451	-7.93457	-18.9209	1.83105	5.49316	10.376
92.9	-37.2314	-22.583	-12.8174	-11.5967	-17.0898	-21.9727	-44.5557	-32.3486	-20.752	-6.10352	3.66211	12.8174	7.32422
93	-36.0107	-19.5312	-6.10352	-6.10352	-15.2588	-21.9727	-42.7246	-26.8555	-17.0898	-4.27246	2.44141	9.15527	10.9863
93.1	-34.1797	-17.7002	-14.0381	-6.71387	-15.2588	-25.6348	-36.6211	-30.5176	-14.6484	-8.54492	4.27246	9.15527	18.9209
93.2	-27.4658	-16.4795	-8.54492	-12.207	-12.8174	-22.583	-49.4385	-27.4658	-20.1416	-9.76562	0	9.76562	12.8174
93.3	-33.5693	-20.1416	-9.76562	-4.88281	-15.8691	-24.4141	-44.5557	-31.1279	-12.207	-9.76562	3.05176	13.4277	5.49316
93.4	-36.6211	-18.9209	-11.5967	-10.9863	-18.9209	-23.8037	-43.335	-29.2969	-13.4277	-12.207	1.2207	2.44141	12.207
93.5	-32.959	-19.5312	-12.207	-9.76562	-14.6484	-21.9727	-49.4385	-25.0244	-14.0381	-0.610352	0	10.9863	12.8174
93.6	-37.8418	-10.376	-14.6484	-9.15527	-15.2588	-23.1934	-51.2695	-29.2969	-9.15527	-4.88281	1.83105	8.54492	17.7002
93.7	-31.1279	-16.4795	-10.9863	-12.207	-17.7002	-27.4658	-43.335	-34.1797	-17.0898	-8.54492	1.2207	7.93457	10.376
93.8	-34.79	-18.3105	-10.9863	-6.10352	-17.0898	-21.9727	-49.4385	-29.9072	-9.76562	-4.88281	-1.2207	9.15527	8.54492
93.9	-29.2969	-17.0898	-10.9863	-8.54492	-15.8691	-20.752	-46.3867	-32.3486	-9.76562	-14.6484	0.610352	1.83105	15.8691
94	-33.5693	-18.3105	-8.54492	-10.9863	-8.54492	-25.6348	-54.3213	-27.4658	-10.376	-0.610352	3.05176	5.49316	12.8174
94.1	-36.0107	-18.9209	-6.71387	-7.32422	-15.2588	-21.3623	-41.5039	-26.8555	-10.376	-9.15527	0	6.71387	12.207
94.2	-35.4004	-17.0898	-12.207	-8.54492	-15.8691	-28.0762	-41.5039	-21.9727	-9.76562	-5.49316	1.2207	12.207	11.5967
94.3	-34.1797	-18.9209	-9.15527	-12.207	-20.1416	-25.0244	-39.0625	-28.0762	-9.15527	-2.44141	3.66211	14.0381	14.0381
94.4	-33.5693	-18.3105	-9.76562	-7.93457	-12.8174	-19.5312	-37.2314	-21.3623	-4.88281	-15.8691	7.32422	11.5967	11.5967
94.5	-32.959	-19.5312	-13.4277	-9.76562	-12.8174	-23.1934	-40.8936	-24.4141	-10.376	-10.9863	-2.44141	7.93457	15.2588
94.6	-37.2314	-17.7002	-12.207	-12.8174	-9.76562	-18.3105	-39.6729	-25.6348	-15.2588	-2.44141	1.2207	12.207	14.0381
94.7	-25.6348	-17.0898	-13.4277	-7.32422	-14.0381	-24.4141	-33.5693	-24.4141	-7.93457	-6.71387	1.2207	10.376	14.0381
94.8	-32.959	-16.4795	-10.9863	-8.54492	-14.6484	-25.0244	-42.7246	-20.752	-11.5967	-5.49316	3.05176	11.5967	12.8174
94.9	-29.9072	-20.1416	-7.32422	-10.376	-15.2588	-24.4141	-43.335	-21.9727	-8.54492	-7.32422	-2.44141	12.207	18.3105
95	-37.8418	-18.9209	-17.0898	-4.88281	-18.9209	-18.3105	-39.0625	-21.9727	-9.76562	-6.71387	3.05176	16.4795	24.4141
95.1	-29.2969	-20.752	-7.32422	-7.93457	-12.207	-26.2451	-37.8418	-23.8037	-8.54492	-4.27246	1.2207	9.15527	21.3623
95.2	-32.959	-21.3623	-13.4277	-12.8174	-21.3623	-31.7383	-40.2832	-23.1934	-4.88281	-1.83105	4.27246	9.76562	18.3105
95.3	-36.0107	-17.0898	-12.8174	-12.207	-10.9863	-26.8555	-36.6211	-21.9727	-10.9863	-6.10352	1.2207	10.9863	21.9727
95.4	-31.1279	-14.6484	-11.5967	-8.54492	-10.376	-24.4141	-28.0762	-21.3623	-15.8691	-4.27246	4.27246	9.76562	21.3623
95.5	-37.8418	-18.3105	-15.2588	-13.4277	-14.6484	-26.8555	-31.1279	-22.583	-15.8691	0	3.66211	9.76562	18.3105
95.6	-26.2451	-11.5967	-9.76562	-9.15527	-16.4795	-29.9072	-32.3486	-17.0898	-12.8174	-10.376	3.66211	8.54492	25.6348
95.7	-32.959	-14.0381	-6.10352	-10.376	-9.76562	-26.2451	-36.6211	-18.9209	-12.207	-1.83105	4.27246	9.15527	24.4141
95.8	-36.0107	-15.8691	-10.9863	-8.54492	-17.7002	-25.6348	-37.2314	-25.0244	-14.0381	-6.10352	3.05176	13.4277	24.4141
95.9	-32.3486	-22.583	-10.376	-6.10352	-14.6484	-18.9209	-34.79	-20.1416	-18.3105	-3.05176	4.88281	16.4795	21.9727
96	-42.1143	-17.7002	-6.71387	-8.54492	-14.0381	-28.0762	-34.79	-24.4141	-17.0898	-8.54492	1.83105	13.4277	22.583
96.1	-33.5693	-12.207	-10.9863	-12.207	-14.0381	-28.6865	-27.4658	-20.1416	-16.4795	-4.88281	6.71387	10.9863	21.3623
96.2	-36.0107	-19.5312	-10.9863	-11.5967	-17.0898	-21.3623	-34.1797	-25.6348	-7.93457	-6.10352	8.54492	13.4277	29.2969
96.3	-34.79	-19.5312	-10.376	-8.54492	-16.4795	-29.9072	-34.1797	-21.3623	-11.5967	-3.66211	1.83105	3.66211	24.4141
96.4	-39.0625	-18.3105	-10.9863	-11.5967	-18.3105	-20.1416	-36.6211	-23.8037	-9.15527	-6.10352	3.66211	12.207	23.1934
96.5	-37.8418	-21.3623	-10.9863	-9.76562	-17.0898	-20.752	-33.5693	-26.2451	-9.76562	-6.71387	7.32422	9.15527	20.1416
96.6	-41.5039	-15.8691	-4.27246	-8.54492	-15.8691	-20.1416	-29.9072	-24.4141	-6.10352	-4.27246	9.76562	12.207	29.9072
96.7	-36.6211	-22.583	-10.376	-7.32422	-14.0381	-21.9727	-29.2969	-25.6348	-10.376	-4.88281	2.44141	10.9863	26.8555
96.8	-34.79	-12.8174	-8.54492	-9.76562	-13.4277	-17.0898	-33.5693	-23.1934	-9.76562	-4.88281	1.2207	13.4277	29.2969
96.9	-30.5176	-17.0898	-7.32422	-6.10352	-23.8037	-14.6484	-37.2314	-21.9727	-13.4277	-1.83105	10.9863	12.207	21.3623
97	-29.9072	-15.8691	-12.207	-9.15527	-12.207	-20.1416	-28.6865	-22.583	-10.9863	-7.32422	4.27246	14.0381	29.9072
97.1	-30.5176	-20.752	-9.76562	-12.8174	-14.0381	-20.752	-31.1279	-26.2451	-10.9863	-4.27246	1.2207	12.8174	25.6348
97.2	-30.5176	-14.6484	-14.0381	-9.76562	-13.4277	-17.0898	-23.1934	-27.4658	-14.0381	-9.15527	9.15527	16.4795	28.0762
97.3	-30.5176	-20.1416	-5.49316	-4.88281	-15.8691	-22.583	-26.2451	-25.0244	-4.88281	-9.15527	6.71387	13.4277	32.3486
97.4	-34.1797	-26.8555	-4.88281	-12.207	-14.0381	-17.7002	-25.6348	-25.0244	-4.27246	-3.05176	3.05176	18.3105	26.2451
97.5	-32.959	-18.9209	-10.9863	-9.15527	-16.4795	-17.0898	-34.1797	-21.3623	-9.76562	-7.32422	7.93457	14.6484	32.3486
97.6	-32.959	-16.4795	-10.9863	-9.15527	-17.0898	-20.752	-24.4141	-25.6348	-8.54492	-3.05176	7.32422	20.1416	26.8555
97.7	-34.1797	-24.4141	-7.32422	-6.10352	-16.4795	-17.0898	-27.4658	-25.6348	-12.207	-1.2207	4.88281	14.6484	31.1279
97.8	-33.5693	-16.4795	-7.32422	-4.27246	-15.8691	-18.3105	-33.5693	-16.4795	-7.32422	-4.27246	10.376	16.4795	34.1797
97.9	-26.2451	-17.7002	-9.76562	-10.376	-15.8691	-17.0898	-31.7383	-19.5312	-12.8174	-9.76562	10.376	21.9727	41.5039
98	-32.3486	-19.5312	-8.54492	-5.49316	-15.2588	-24.4141	-29.2969	-21.9727	-9.76562	-2.44141	15.8691	20.752	32.959
98.1	-36.6211	-18.9209	-9.15527	-8.54492	-14.0381	-14.6484	-28.0762	-17.7002	-7.32422	-3.05176	9.15527	14.0381	33.5693
98.2	-35.4004	-16.4795	-7.93457	-10.376	-15.2588	-22.583	-26.8555	-18.3105	-7.93457	-2.44141	4.88281	18.3105	37.8418
98.3	-31.1279	-21.9727	-10.376	-6.71387	-10.9863	-16.4795	-29.9072	-23.1934	-10.376	0	12.8174	17.0898	32.959
98.4	-31.7383	-22.583	-10.9863	-9.76562	-18.3105	-21.9727	-34.79	-13.4277	-14.0381	-5.49316	10.376	16.4795	36.6211
98.5	-30.5176	-20.752	-12.8174	-6.10352	-14.6484	-15.8691	-32.959	-20.1416	-10.376	-6.10352	6.71387	19.5312	36.6211
98.6	-29.2969	-16.4795	-12.8174	-4.88281	-13.4277	-21.3623	-32.959	-18.3105	-14.6484	-0.610352	6.10352	13.4277	33.5693
98.7	-36.6211	-18.3105	-4.88281	-10.376	-12.8174	-19.5312	-31.1279	-20.1416	-18.3105	-2.44141	9.15527	24.4141	37.2314
98.8	-27.4658	-20.752	-13.4277	-15.8691	-14.6484	-15.8691	-36.0107	-18.9209	-12.8174	-6.71387	13.4277	17.7002	40.2832
98.9	-31.1279	-14.0381	-12.207	-7.93457	-14.6484	-17.0898	-36.0107	-20.1416	-7.32422	-4.27246	10.9863	18.3105	36.6211
99	-31.7383	-12.8174	-6.71387	-7.93457	-15.8691	-21.3623	-33.5693	-23.1934	-10.376	3.05176	14.6484	20.752	39.6729
99.1	-34.79	-18.3105	-12.8174	-5.49316	-15.2588	-11.5967	-32.959	-24.4141	-9.15527	-1.2207	10.376	25.0244	42.1143
99.2	-36.0107	-21.9727	-9.76562	-12.207	-17.0898	-18.3105	-32.3486	-21.3623	-18.3105	5.49316	4.88281	19.5312	40.2832
99.3	-34.1797	-21.3623	-8.54492	-6.71387	-15.2588	-21.9727	-32.959	-23.8037	-9.15527	-4.27246	17.0898	28.0762	41.5039
99.4	-25.6348	-15.2588	-7.32422	-5.49316	-19.5312	-13.4277	-33.5693	-17.0898	-8.54492	1.2207	19.5312	20.1416	40.8936
99.5	-27.4658	-15.8691	-6.71387	-8.54492	-8.54492	-12.207	-30.5176	-17.0898	-7.32422	-5.49316	13.4277	26.8555	47.6074
99.6	-36.6211	-19.5312	-6.71387	-10.376	-11.5967	-15.8691	-29.2969	-20.752	-9.76562	0.610352	17.7002	21.3623	39.0625
99.7	-34.1797	-24.4141	-6.71387	-10.376	-14.6484	-20.752	-32.959	-18.9209	-7.93457	-0.610352	23.8037	25.0244	44.5557
99.8	-42.1143	-19.5312	-10.9863	-11.5967	-14.0381	-15.2588	-31.1279	-15.2588	-15.2588	1.2207	15.2588	25.0244	48.8281
99.9	-30.5176	-24.4141	-7.32422	-7.93457	-13.4277	-17.0898	-26.8555	-21.3623	-8.54492	-3.66211	14.6484	18.9209	45.166
100	-37.8418	-18.3105	-9.76562	-10.376	-16.4795	-19.5312	-26.2451	-18.3105	-12.207	0.610352	14.6484	31.7383	51.8799
100.1	-36.0107	-19.5312	-15.8691	-9.15527	-13.4277	-13.4277	-26.2451	-17.7002	-9.15527	0	17.7002	21.9727	48.8281
100.2	-39.6729	-19.5312	-13.4277	-6.71387	-15.8691	-12.207	-27.4658	-15.8691	-8.54492	3.05176	15.8691	26.2451	50.6592
100.3	-32.959	-22.583	-9.76562	-8.54492	-18.3105	-12.207	-28.6865	-22.583	-8.54492	2.44141	15.2588	26.8555	50.0488
100.4	-33.5693	-18.9209	-17.7002	-10.9863	-14.6484	-16.4795	-19.5312	-21.9727	-10.376	-1.2207	10.376	21.3623	54.3213
100.5	-35.4004	-17.7002	-6.71387	-10.376	-14.0381	-21.3623	-17.7002	-23.1934	-3.66211	4.27246	12.207	26.8555	52.4902
100.6	-36.0107	-19.5312	-10.376	-9.76562	-18.9209	-18.9209	-25.6348	-18.9209	-12.207	0	14.6484	28.0762	64.6973
100.7	-28.6865	-15.8691	-15.2588	-9.15527	-11.5967	-14.6484	-31.7383	-14.0381	-16.4795	1.2207	19.5312	26.2451	51.8799
100.8	-34.1797	-17.7002	-9.15527	-9.76562	-14.0381	-14.0381	-18.9209	-14.0381	-11.5967	8.54492	17.0898	32.3486	54.3213
100.9	-39.0625	-18.3105	-14.0381	-9.15527	-17.0898	-14.6484	-20.752	-18.9209	-3.66211	4.88281	16.4795	34.1797	57.9834
101	-39.0625	-18.9209	-14.6484	-9.15527	-20.752	-15.2588	-24.4141	-13.4277	-4.27246	1.83105	18.3105	31.7383	60.4248
101.1	-36.6211	-16.4795	-11.5967	-10.376	-18.3105	-13.4277	-20.1416	-17.7002	-3.66211	4.88281	15.8691	36.0107	60.4248
101.2	-38.4521	-14.0381	-7.32422	-9.76562	-16.4795	-15.2588	-25.0244	-18.9209	-8.54492	7.32422	15.2588	34.1797	61.0352
101.3	-41.5039	-21.3623	-8.54492	-14.0381	-15.2588	-15.8691	-27.4658	-17.0898	0	7.32422	15.8691	37.2314	68.9697
101.4	-31.1279	-14.6484	-12.207	-10.9863	-20.752	-15.2588	-26.2451	-13.4277	-5.49316	2.44141	13.4277	45.166	60.4248
101.5	-37.8418	-21.3623	-9.76562	-7.32422	-10.9863	-12.207	-23.8037	-18.9209	-8.54492	8.54492	13.4277	36.0107	56.7627
101.6	-35.4004	-19.5312	-12.207	-9.76562	-13.4277	-15.8691	-29.9072	-17.0898	-4.27246	3.05176	19.5312	36.0107	66.5283
101.7	-34.79	-22.583	-10.9863	-13.4277	-18.9209	-15.2588	-24.4141	-16.4795	-2.44141	4.27246	19.5312	43.335	57.373
101.8	-32.959	-12.8174	-10.376	-13.4277	-14.6484	-12.8174	-32.959	-19.5312	-8.54492	10.376	21.9727	37.8418	64.6973
101.9	-36.0107	-23.8037	-12.8174	-6.10352	-14.6484	-10.9863	-22.583	-21.9727	-1.83105	3.66211	20.1416	42.1143	61.6455
102	-34.79	-25.6348	-7.32422	-7.32422	-17.7002	-10.376	-18.9209	-7.93457	-6.71387	6.10352	17.7002	40.2832	66.5283
102.1	-37.2314	-22.583	-15.8691	-7.32422	-12.207	-19.5312	-23.8037	-10.9863	1.83105	-1.2207	21.3623	43.9453	65.3076
102.2	-39.0625	-20.1416	-14.0381	-6.10352	-12.8174	-17.7002	-21.3623	-16.4795	-2.44141	9.76562	25.0244	46.3867	68.3594
102.3	-33.5693	-20.752	-10.376	-11.5967	-20.1416	-12.8174	-18.3105	-15.8691	-0.610352	4.27246	17.7002	45.166	61.0352
102.4	-39.6729	-22.583	-8.54492	-6.10352	-14.6484	-17.0898	-17.7002	-11.5967	-4.88281	6.10352	23.1934	51.2695	62.2559
102.5	-32.959	-18.3105	-8.54492	-6.71387	-7.93457	-17.0898	-22.583	-17.0898	-1.2207	0.610352	27.4658	43.9453	66.5283
102.6	-34.1797	-17.0898	-6.10352	-9.15527	-13.4277	-10.376	-20.752	-13.4277	1.83105	4.27246	23.1934	45.7764	70.1904
102.7	-35.4004	-20.1416	-7.93457	-10.9863	-15.2588	-12.207	-20.752	-13.4277	-1.2207	7.32422	22.583	48.8281	68.9697
102.8	-38.4521	-21.3623	-8.54492	-14.0381	-15.8691	-15.8691	-20.752	-12.8174	-6.71387	7.32422	23.1934	51.2695	69.5801
102.9	-39.0625	-16.4795	-7.93457	-10.9863	-18.9209	-12.207	-15.2588	-15.8691	-2.44141	9.76562	17.7002	50.0488	75.6836
103	-37.8418	-20.752	-9.15527	-3.66211	-14.0381	-11.5967	-22.583	-10.9863	-6.71387	10.376	19.5312	51.8799	75.0732
103.1	-33.5693	-17.7002	-8.54492	-7.93457	-13.4277	-17.0898	-20.1416	-7.32422	0.610352	7.93457	27.4658	55.542	74.4629
103.2	-34.1797	-18.9209	-12.207	-10.376	-9.76562	-12.207	-20.752	-15.2588	-5.49316	17.0898	23.1934	54.3213	79.3457
103.3	-38.4521	-17.0898	-12.207	-10.9863	-14.0381	-10.376	-26.2451	-21.3623	-5.49316	9.15527	27.4658	55.542	78.7354
103.4	-31.1279	-14.0381	-10.9863	-15.8691	-14.6484	-16.4795	-26.8555	-15.2588	-4.88281	7.32422	24.4141	53.1006	85.4492
103.5	-34.1797	-18.3105	-10.9863	-9.15527	-15.8691	-14.0381	-25.0244	-13.4277	-2.44141	14.6484	33.5693	58.5938	84.2285
103.6	-38.4521	-18.3105	-11.5967	-10.376	-17.0898	-10.9863	-26.8555	-14.6484	0.610352	10.376	26.8555	56.7627	90.332
103.7	-37.2314	-17.0898	-12.8174	-9.76562	-14.0381	-8.54492	-26.8555	-14.0381	-1.2207	3.66211	29.9072	50.6592	85.4492
103.8	-29.9072	-17.0898	-12.207	-9.15527	-11.5967	-13.4277	-24.4141	-2.44141	-7.32422	10.9863	33.5693	58.5938	94.6045
103.9	-37.8418	-15.8691	-9.76562	-8.54492	-13.4277	-14.6484	-19.5312	-10.376	-4.88281	9.76562	26.2451	59.8145	92.1631
104	-34.79	-16.4795	-6.71387	-8.54492	-12.207	-15.8691	-21.3623	-17.7002	-3.66211	13.4277	24.4141	57.373	95.2148
104.1	-41.5039	-15.8691	-11.5967	-7.32422	-12.8174	-15.2588	-24.4141	-11.5967	-0.610352	7.93457	31.1279	61.0352	98.2666
104.2	-39.0625	-25.6348	-14.6484	-9.15527	-17.0898	-13.4277	-21.9727	-6.71387	0	4.27246	34.79	63.4766	101.318
104.3	-36.0107	-20.752	-9.76562	-7.93457	-17.0898	-17.7002	-20.1416	-13.4277	-6.71387	9.76562	30.5176	67.1387	98.877
104.4	-32.3486	-21.3623	-9.76562	-8.54492	-15.8691	-12.207	-21.3623	-14.6484	3.66211	15.8691	28.6865	65.3076	101.318
104.5	-34.1797	-21.9727	-14.0381	-6.10352	-14.6484	-14.0381	-26.2451	-14.0381	-7.32422	12.207	32.3486	63.4766	105.591
104.6	-40.2832	-21.3623	-16.4795	-10.9863	-15.8691	-15.8691	-20.1416	-11.5967	0.610352	14.6484	30.5176	65.3076	107.422
104.7	-37.2314	-14.6484	-10.9863	-4.88281	-12.207	-10.376	-17.0898	-7.93457	0.610352	14.6484	32.3486	65.3076	109.863
104.8	-43.335	-10.376	-14.0381	-7.93457	-9.15527	-8.54492	-23.1934	-20.752	3.66211	17.0898	30.5176	64.0869	104.98
104.9	-34.79	-15.8691	-14.6484	-7.32422	-19.5312	-10.9863	-21.9727	-11.5967	1.2207	10.9863	28.6865	67.1387	108.032
105	-37.8418	-18.3105	-11.5967	-7.93457	-18.3105	-12.8174	-18.9209	-14.6484	-1.83105	15.2588	28.6865	71.4111	108.643
105.1	-34.79	-22.583	-13.4277	-4.88281	-14.0381	-4.27246	-15.8691	-18.9209	-0.610352	4.88281	34.79	71.4111	106.812
105.2	-35.4004	-14.0381	-12.207	-7.32422	-16.4795	-15.8691	-17.0898	-14.6484	8.54492	12.207	35.4004	70.8008	112.915
105.3	-34.1797	-21.3623	-10.376	-10.9863	-17.0898	-13.4277	-9.15527	-10.376	4.88281	7.93457	36.0107	68.3594	114.746
105.4	-32.3486	-16.4795	-13.4277	-3.66211	-10.9863	-10.9863	-18.9209	-10.9863	7.93457	9.15527	37.8418	73.2422	111.694
105.5	-31.7383	-21.9727	-8.54492	-8.54492	-13.4277	-10.9863	-18.3105	-14.0381	-1.83105	10.9863	36.6211	72.6318	120.239
105.6	-31.1279	-20.752	-7.93457	-8.54492	-12.8174	-11.5967	-15.8691	-7.93457	4.88281	12.207	37.2314	79.3457	113.525
105.7	-37.8418	-15.8691	-11.5967	-8.54492	-14.0381	-9.76562	-18.3105	-9.76562	6.10352	15.8691	37.8418	72.6318	116.577
105.8	-32.3486	-20.752	-11.5967	-7.32422	-12.8174	-3.66211	-26.8555	-8.54492	4.27246	17.7002	42.7246	74.4629	119.629
105.9	-36.0107	-18.3105	-12.8174	-9.15527	-11.5967	-8.54492	-21.3623	-12.8174	15.2588	9.76562	40.2832	77.5146	120.85
106	-40.8936	-20.1416	-12.207	-9.15527	-18.9209	-14.0381	-14.0381	-4.88281	4.27246	9.76562	37.8418	80.5664	127.563
106.1	-39.6729	-20.1416	-11.5967	-10.9863	-7.93457	-13.4277	-17.7002	-14.0381	3.66211	12.207	39.0625	77.5146	118.408
106.2	-28.6865	-26.2451	-10.376	-9.76562	-12.207	-10.376	-12.8174	-13.4277	2.44141	18.3105	47.6074	75.6836	122.681
106.3	-34.1797	-15.8691	-9.76562	-6.10352	-14.6484	-13.4277	-14.6484	-7.93457	3.66211	20.1416	42.7246	84.2285	124.512
106.4	-30.5176	-17.7002	-10.376	-4.88281	-15.8691	-15.2588	-14.6484	-14.0381	6.71387	17.0898	41.5039	84.8389	130.005
106.5	-33.5693	-15.2588	-9.76562	-4.27246	-18.3105	-13.4277	-21.3623	-6.71387	-0.610352	13.4277	42.7246	84.2285	125.122
106.6	-35.4004	-18.3105	-12.8174	-8.54492	-7.93457	-9.15527	-14.0381	-5.49316	3.05176	14.6484	37.2314	80.5664	128.174
106.7	-33.5693	-20.1416	-11.5967	-8.54492	-17.0898	-12.207	-19.5312	-6.71387	3.66211	26.8555	45.166	82.3975	130.615
106.8	-32.3486	-20.752	-17.7002	-4.88281	-7.32422	-14.6484	-16.4795	-5.49316	5.49316	18.3105	50.0488	81.1768	128.174
106.9	-34.79	-18.3105	-20.752	-8.54492	-11.5967	-4.27246	-23.1934	-4.88281	2.44141	18.3105	43.9453	84.2285	139.771
107	-31.7383	-12.207	-9.15527	-3.66211	-14.6484	-9.15527	-13.4277	-4.88281	3.05176	27.4658	48.8281	82.3975	124.512
107.1	-32.959	-18.9209	-12.8174	-9.76562	-15.8691	-11.5967	-18.3105	-7.32422	3.66211	21.9727	45.166	85.4492	133.667
107.2	-27.4658	-18.9209	-15.8691	-6.10352	-14.6484	-12.207	-21.9727	-6.10352	5.49316	23.8037	50.0488	91.5527	134.888
107.3	-34.1797	-25.0244	-7.32422	-8.54492	-15.8691	-9.15527	-18.3105	-7.32422	6.71387	21.9727	48.2178	90.9424	139.771
107.4	-33.5693	-21.3623	-13.4277	-6.71387	-15.2588	-6.71387	-18.3105	-3.05176	3.05176	24.4141	48.8281	89.1113	138.55
107.5	-34.1797	-20.1416	-15.2588	-6.71387	-16.4795	-12.207	-20.1416	-4.88281	9.76562	23.1934	45.7764	91.5527	143.433
107.6	-32.959	-25.0244	-11.5967	-7.93457	-14.0381	-9.15527	-15.2588	-7.93457	9.76562	25.6348	51.8799	92.1631	145.264
107.7	-36.0107	-16.4795	-8.54492	-8.54492	-12.8174	-7.93457	-16.4795	-2.44141	10.376	21.9727	53.7109	89.7217	148.926
107.8	-35.4004	-20.752	-8.54492	-4.27246	-12.207	-12.207	-15.2588	-6.10352	12.207	21.3623	50.0488	87.2803	145.874
107.9	-34.1797	-13.4277	-13.4277	-7.93457	-12.8174	-7.93457	-15.8691	-11.5967	9.15527	29.2969	54.9316	95.8252	155.64
108	-33.5693	-20.752	-10.9863	-7.32422	-12.207	-11.5967	-19.5312	-10.376	20.752	28.6865	55.542	97.0459	157.471
108.1	-33.5693	-20.1416	-13.4277	-12.207	-6.71387	-13.4277	-10.9863	-6.10352	13.4277	26.2451	56.1523	89.7217	158.691
108.2	-34.1797	-20.752	-12.207	-7.32422	-15.8691	-7.32422	-13.4277	-10.9863	12.207	18.3105	51.8799	90.332	161.743
108.3	-30.5176	-18.9209	-12.207	-7.93457	-11.5967	-10.9863	-14.6484	-7.93457	4.88281	27.4658	61.0352	94.6045	164.795
108.4	-30.5176	-15.8691	-11.5967	-1.83105	-10.376	-9.15527	-17.0898	-5.49316	13.4277	24.4141	58.5938	103.76	166.626
108.5	-35.4004	-19.5312	-16.4795	-7.32422	-14.6484	-13.4277	-7.32422	-4.88281	11.5967	25.6348	57.9834	102.539	162.354
108.6	-31.7383	-15.8691	-15.2588	-6.71387	-6.71387	-6.71387	-10.376	-6.10352	15.2588	23.1934	62.2559	104.98	169.678
108.7	-35.4004	-15.8691	-11.5967	-9.76562	-13.4277	-9.76562	-10.9863	-1.83105	10.9863	22.583	62.2559	104.37	159.302
108.8	-32.3486	-27.4658	-15.2588	-6.71387	-12.207	-6.10352	-9.76562	-0.610352	12.207	28.6865	65.918	105.591	170.898
108.9	-34.79	-21.9727	-8.54492	-7.93457	-19.5312	-7.93457	-12.207	3.05176	10.376	26.2451	64.6973	112.305	164.795
109	-31.7383	-20.752	-9.15527	-4.88281	-12.207	-8.54492	-15.8691	-4.27246	18.3105	30.5176	67.749	108.643	166.016
109.1	-31.1279	-20.1416	-8.54492	-7.32422	-11.5967	-3.66211	-17.0898	-2.44141	11.5967	32.959	62.8662	106.201	170.288
109.2	-34.1797	-19.5312	-14.6484	-4.88281	-10.9863	-14.0381	-11.5967	-3.66211	16.4795	28.0762	59.8145	109.863	169.678
109.3	-32.959	-18.3105	-14.6484	-4.88281	-10.376	-14.0381	-7.32422	-0.610352	14.6484	25.6348	61.0352	108.032	171.509
109.4	-37.2314	-17.7002	-14.0381	-9.15527	-21.3623	-9.15527	-13.4277	-4.27246	14.6484	31.7383	61.0352	107.422	168.457
109.5	-32.959	-18.9209	-15.8691	-7.32422	-12.207	-11.5967	-12.8174	0	14.0381	29.2969	64.0869	114.136	181.885
109.6	-33.5693	-19.5312	-10.9863	-10.9863	-11.5967	-12.8174	-2.44141	1.2207	12.8174	25.6348	68.3594	109.863	184.937
109.7	-34.1797	-16.4795	-11.5967	-2.44141	-13.4277	-7.32422	-12.8174	-2.44141	9.76562	34.79	68.9697	108.032	182.495
109.8	-38.4521	-18.3105	-5.49316	-7.93457	-15.2588	-10.376	-8.54492	0.610352	8.54492	32.3486	67.1387	113.525	184.937
109.9	-27.4658	-23.1934	-11.5967	-6.10352	-14.0381	-13.4277	-4.27246	2.44141	15.8691	35.4004	65.918	115.967	188.599
110	-35.4004	-20.1416	-9.15527	-3.05176	-11.5967	-8.54492	-14.0381	-7.32422	14.6484	36.6211	67.749	113.525	184.937
110.1	-35.4004	-20.752	-13.4277	-6.71387	-11.5967	-6.10352	-14.6484	0.610352	12.8174	29.9072	63.4766	117.798	184.326
110.2	-35.4004	-23.1934	-11.5967	-8.54492	-9.15527	-8.54492	-14.6484	0.610352	17.7002	35.4004	71.4111	123.901	188.599
110.3	-29.2969	-17.7002	-6.71387	-6.71387	-6.71387	-12.207	-11.5967	1.83105	16.4795	36.0107	72.6318	123.291	194.092
110.4	-36.0107	-22.583	-6.71387	-3.66211	-10.9863	-14.6484	-6.71387	0.610352	20.752	33.5693	72.6318	120.239	191.65
110.5	-37.8418	-20.1416	-10.376	-10.376	-10.376	-14.0381	-13.4277	3.05176	19.5312	36.6211	66.5283	121.46	194.702
110.6	-34.79	-21.3623	-7.32422	-4.27246	-10.9863	-10.376	-8.54492	3.05176	17.7002	36.6211	68.3594	128.784	200.806
110.7	-34.1797	-20.752	-9.76562	-10.376	-15.2588	-10.376	-6.71387	2.44141	23.8037	36.6211	69.5801	132.446	198.364
110.8	-36.0107	-22.583	-6.10352	-6.71387	-9.76562	-10.9863	-9.15527	0.610352	19.5312	37.2314	75.6836	121.46	194.702
110.9	-39.6729	-22.583	-7.93457	-4.27246	-14.6484	-8.54492	-8.54492	-3.05176	15.2588	35.4004	70.8008	134.277	198.364
111	-32.3486	-20.752	-9.76562	-7.93457	-13.4277	-12.207	-3.66211	-2.44141	18.9209	33.5693	72.6318	133.667	203.247
111.1	-37.8418	-19.5312	-7.93457	-6.10352	-12.8174	-8.54492	-10.376	1.83105	21.3623	42.1143	70.8008	134.888	208.13
111.2	-32.959	-21.3623	-9.76562	-12.207	-9.76562	-10.376	-9.76562	-4.27246	22.583	38.4521	75.6836	136.108	204.468
111.3	-39.0625	-16.4795	-7.32422	-4.88281	-13.4277	-4.88281	-9.76562	-1.2207	28.0762	37.2314	70.1904	134.888	203.247
111.4	-31.1279	-20.752	-8.54492	-7.93457	-12.207	-12.8174	-6.10352	1.83105	23.1934	37.2314	65.918	138.55	203.247
111.5	-32.959	-24.4141	-14.0381	-4.88281	-11.5967	-4.27246	-3.66211	-2.44141	17.7002	37.2314	73.2422	139.16	209.961
111.6	-32.959	-20.752	-10.9863	-7.93457	-7.32422	-4.88281	-1.83105	-1.2207	21.9727	44.5557	75.0732	138.55	205.078
111.7	-38.4521	-21.3623	-7.32422	-7.93457	-10.376	-11.5967	-6.71387	4.88281	23.8037	31.7383	77.5146	142.212	205.688
111.8	-37.2314	-21.3623	-12.207	-8.54492	-12.8174	-3.05176	-3.66211	3.05176	28.0762	39.6729	78.7354	147.095	208.13
111.9	-29.9072	-15.2588	-3.05176	-6.10352	-16.4795	-5.49316	-5.49316	3.66211	23.8037	36.6211	81.1768	143.433	212.402
112	-28.0762	-25.0244	-6.71387	-1.2207	-15.2588	-12.207	-3.66211	-1.2207	20.752	37.8418	74.4629	146.484	218.506
112.1	-34.1797	-24.4141	-5.49316	-5.49316	-14.6484	-8.54492	-5.49316	-3.05176	21.3623	45.166	78.7354	151.978	215.454
112.2	-32.959	-22.583	-10.376	-3.66211	-10.376	-3.66211	-6.10352	0	26.2451	44.5557	84.2285	154.419	209.961
112.3	-36.0107	-19.5312	-7.32422	-7.93457	-8.54492	-8.54492	-1.83105	3.05176	23.8037	39.0625	78.125	154.419	215.454
112.4	-36.0107	-24.4141	-10.9863	-7.93457	-14.6484	-7.93457	3.66211	4.27246	24.4141	42.1143	89.1113	153.809	214.233
112.5	-36.6211	-18.9209	-7.32422	-6.10352	-10.9863	-4.88281	-8.54492	4.88281	31.1279	31.1279	82.3975	144.043	223.389
112.6	-34.1797	-22.583	-8.54492	0.610352	-9.76562	-12.207	-0.610352	9.15527	28.0762	36.0107	76.2939	147.705	220.947
112.7	-33.5693	-21.3623	-8.54492	-3.66211	-9.76562	-13.4277	-0.610352	8.54492	20.752	44.5557	83.0078	155.029	222.778
112.8	-31.1279	-18.3105	-10.376	-6.10352	-10.9863	-10.376	-1.83105	12.207	26.8555	43.9453	87.2803	157.471	231.323
112.9	-30.5176	-15.8691	-12.207	-7.32422	-11.5967	-7.32422	0	0	24.4141	40.2832	83.6182	160.522	233.765
113	-32.959	-17.7002	-12.207	-6.10352	-14.0381	-1.83105	0	4.88281	21.3623	37.2314	89.1113	160.522	226.44
113.1	-28.0762	-20.752	-14.0381	-5.49316	-7.93457	-6.10352	3.05176	7.32422	26.8555	40.8936	92.7734	166.626	231.323
113.2	-31.7383	-18.3105	-13.4277	-10.9863	-14.6484	-3.05176	-0.610352	7.93457	25.6348	42.7246	89.7217	166.626	233.765
113.3	-32.959	-20.752	-10.9863	-7.93457	-11.5967	-6.71387	-4.88281	7.93457	25.6348	48.8281	93.3838	163.574	241.089
113.4	-36.0107	-22.583	-12.207	-4.88281	-9.15527	-8.54492	-0.610352	11.5967	30.5176	44.5557	97.6562	169.067	241.089
113.5	-29.9072	-21.3623	-18.3105	-7.93457	-6.71387	-8.54492	-7.32422	7.93457	32.959	48.8281	99.4873	175.781	245.972
113.6	-31.7383	-20.752	-4.88281	-4.88281	-11.5967	-4.88281	-7.32422	8.54492	26.2451	52.4902	97.0459	166.626	249.634
113.7	-35.4004	-13.4277	-13.4277	-6.71387	-10.9863	-3.05176	-3.05176	7.32422	27.4658	53.1006	98.877	172.119	249.634
113.8	-37.8418	-18.9209	-14.0381	-6.71387	-12.207	-6.71387	-6.71387	6.10352	31.7383	47.6074	99.4873	168.457	255.127
113.9	-39.6729	-19.5312	-7.32422	-9.15527	-12.207	-0.610352	-2.44141	6.10352	31.1279	51.8799	103.76	167.847	256.348
114	-29.9072	-22.583	-14.0381	-6.10352	-7.93457	-5.49316	-4.27246	6.10352	28.6865	49.4385	105.591	170.898	252.075
114.1	-32.959	-23.8037	-5.49316	-4.27246	-4.27246	-1.2207	-10.9863	0.610352	30.5176	50.0488	98.2666	170.288	259.399
114.2	-40.8936	-15.8691	-7.32422	-3.66211	-11.5967	-4.88281	-2.44141	4.88281	31.7383	54.9316	93.9941	175.781	252.686
114.3	-34.1797	-15.8691	-13.4277	-6.71387	-10.9863	-6.10352	-10.376	-4.27246	29.2969	51.2695	101.318	173.95	252.686
114.4	-27.4658	-20.752	-12.8174	-7.93457	-15.2588	-4.88281	-3.05176	3.66211	34.1797	51.2695	100.098	178.833	259.399
114.5	-40.8936	-16.4795	-12.8174	-6.10352	-15.2588	-2.44141	-4.27246	4.27246	29.2969	57.373	99.4873	184.326	265.503
114.6	-39.0625	-23.8037	-13.4277	-9.15527	-12.207	-5.49316	-8.54492	4.88281	29.9072	56.1523	102.539	184.326	256.348
114.7	-42.7246	-21.3623	-7.93457	-4.27246	-10.376	-9.76562	-6.10352	12.8174	26.2451	64.6973	106.201	179.443	258.789
114.8	-35.4004	-18.3105	-14.0381	-12.207	-15.2588	-8.54492	-7.93457	0.610352	32.3486	58.5938	108.643	175.171	258.789
114.9	-28.0762	-17.7002	-9.15527	-8.54492	-14.6484	-0.610352	-6.71387	2.44141	32.959	60.4248	108.643	177.002	265.503
115	-31.1279	-20.752	-8.54492	-5.49316	-14.6484	-4.27246	4.27246	9.76562	36.6211	61.0352	109.863	178.833	266.724
115.1	-33.5693	-28.6865	-1.2207	-6.71387	-12.8174	-10.376	-3.66211	3.05176	39.0625	65.918	115.967	182.495	261.841
115.2	-33.5693	-19.5312	-9.15527	-6.10352	-7.32422	-8.54492	-2.44141	3.05176	29.2969	62.2559	113.525	187.988	269.165
115.3	-33.5693	-21.3623	-10.9863	-12.207	-7.32422	-2.44141	-2.44141	9.15527	34.79	56.7627	108.643	190.43	268.555
115.4	-32.959	-18.9209	-7.93457	-5.49316	-14.6484	1.2207	-6.10352	6.10352	36.6211	60.4248	108.643	192.871	267.944
115.5	-34.1797	-17.7002	-9.15527	-9.76562	-3.66211	-2.44141	0	8.54492	37.8418	67.1387	120.239	190.43	274.658
115.6	-33.5693	-19.5312	-11.5967	-10.9863	-17.0898	0	-6.71387	12.8174	26.8555	58.5938	119.629	199.585	273.438
115.7	-31.7383	-21.9727	-11.5967	-10.9863	-16.4795	0	-0.610352	5.49316	34.79	63.4766	120.239	194.702	281.372
115.8	-35.4004	-21.3623	-11.5967	-8.54492	-5.49316	-7.32422	-2.44141	7.32422	34.1797	66.5283	119.019	198.364	278.931
115.9	-36.0107	-15.8691	-7.32422	-1.2207	-11.5967	-1.83105	-2.44141	6.10352	32.959	63.4766	119.019	199.585	288.086
116	-32.959	-21.3623	-4.88281	-6.10352	-9.15527	0	0	9.15527	38.4521	67.1387	126.343	199.585	282.593
116.1	-34.79	-15.2588	-16.4795	-16.4795	-9.76562	-6.71387	-2.44141	12.207	32.959	61.6455	128.784	201.416	284.424
116.2	-32.3486	-21.3623	-14.0381	-8.54492	-10.9863	-4.27246	4.27246	4.27246	36.0107	62.2559	130.005	205.078	283.813
116.3	-39.0625	-21.9727	-9.15527	-12.207	-14.0381	3.05176	-3.66211	14.0381	32.959	68.3594	125.732	201.416	287.476
116.4	-28.0762	-20.752	-3.66211	-9.76562	-18.9209	-1.83105	-2.44141	12.8174	39.0625	68.3594	128.784	195.312	288.696
116.5	-36.0107	-19.5312	-9.76562	-4.88281	-2.44141	-2.44141	0	5.49316	35.4004	75.6836	128.174	207.52	290.527
116.6	-43.9453	-18.3105	-12.207	-7.32422	-7.32422	1.2207	-6.71387	7.93457	38.4521	71.4111	131.226	206.299	291.748
116.7	-27.4658	-25.6348	-10.376	-10.9863	-3.05176	-4.88281	-4.27246	16.4795	34.1797	76.9043	129.395	213.623	294.8
116.8	-33.5693	-18.3105	-10.9863	-10.376	-11.5967	-1.83105	1.2207	6.71387	36.0107	76.9043	132.446	209.961	290.527
116.9	-36.6211	-15.2588	-8.54492	-7.32422	-9.76562	-5.49316	-6.10352	9.76562	38.4521	70.1904	125.122	216.064	297.852
117	-29.9072	-18.3105	-8.54492	-14.0381	-18.3105	0.610352	-1.2207	12.207	36.6211	80.5664	137.329	217.285	303.345
117.1	-34.1797	-20.752	-6.10352	-10.376	-14.0381	-0.610352	-11.5967	6.71387	40.2832	72.0215	140.991	212.402	305.786
117.2	-34.1797	-15.8691	-8.54492	-10.9863	-12.8174	1.83105	-4.27246	14.0381	37.8418	82.3975	136.108	220.947	307.617
117.3	-32.3486	-19.5312	-12.8174	-7.32422	-9.15527	-4.88281	-1.2207	4.88281	36.6211	75.6836	140.381	216.675	299.683
117.4	-33.5693	-23.1934	-7.32422	-7.32422	-17.0898	1.83105	-0.610352	11.5967	36.0107	76.9043	134.277	225.83	303.345
117.5	-40.2832	-19.5312	-10.9863	-6.71387	-9.76562	0	0	9.15527	39.6729	84.2285	134.888	223.999	304.565
117.6	-37.8418	-17.0898	-9.76562	-9.15527	-7.93457	-3.66211	-3.66211	9.15527	45.7764	83.0078	137.939	227.661	313.11
117.7	-34.79	-18.3105	-10.9863	-12.8174	-14.0381	-1.2207	-2.44141	9.15527	44.5557	81.7871	136.719	227.051	300.903
117.8	-32.959	-15.8691	-7.32422	-7.93457	-11.5967	1.2207	-1.2207	12.207	48.2178	86.6699	142.212	230.713	310.059
117.9	-39.0625	-17.0898	-11.5967	-4.88281	-10.376	0.610352	-1.2207	10.376	41.5039	89.1113	146.484	225.22	308.228
118	-35.4004	-20.752	-12.8174	-6.10352	-12.8174	1.2207	-1.83105	7.32422	45.7764	90.9424	146.484	230.713	310.669
118.1	-39.6729	-16.4795	-10.376	-8.54492	-7.32422	-0.610352	0.610352	10.9863	45.166	87.8906	142.822	228.271	310.059
118.2	-36.6211	-20.1416	-4.88281	-9.15527	-9.15527	-6.71387	1.2207	18.3105	46.9971	93.3838	147.705	230.103	317.383
118.3	-37.8418	-14.6484	-12.207	-8.54492	-9.76562	-6.71387	1.83105	15.2588	45.166	89.1113	147.705	231.934	315.552
118.4	-37.2314	-18.9209	-6.71387	-9.76562	-10.376	0	-0.610352	8.54492	45.166	84.2285	149.536	235.596	319.214
118.5	-38.4521	-15.2588	-8.54492	-5.49316	-12.8174	0.610352	-3.05176	14.0381	47.6074	85.4492	155.029	234.985	321.655
118.6	-37.2314	-16.4795	-11.5967	-1.83105	-9.76562	1.2207	0.610352	15.2588	49.4385	82.3975	156.25	234.375	325.928
118.7	-46.3867	-16.4795	-14.0381	-14.0381	-7.93457	-5.49316	2.44141	17.7002	48.2178	93.9941	153.809	242.31	324.707
118.8	-37.8418	-17.0898	-10.9863	-12.8174	-4.27246	-6.71387	1.2207	15.8691	43.9453	91.5527	155.64	238.037	322.266
118.9	-37.2314	-20.1416	-4.27246	-6.71387	-13.4277	-7.93457	4.27246	10.9863	47.6074	86.0596	160.522	239.868	327.759
119	-42.1143	-20.1416	-14.0381	-4.27246	-6.10352	-5.49316	1.2207	10.9863	48.8281	86.6699	157.471	247.803	332.642
119.1	-37.2314	-19.5312	-3.05176	-12.8174	-6.71387	-1.2207	4.88281	14.6484	50.6592	90.9424	165.405	244.751	338.135
119.2	-32.959	-12.207	-9.76562	-10.376	-12.8174	-5.49316	6.71387	17.0898	54.3213	91.5527	161.743	244.141	330.2
119.3	-33.5693	-18.9209	-10.9863	-7.32422	-9.76562	-0.610352	-0.610352	16.4795	51.2695	95.8252	161.743	243.53	342.407
119.4	-36.0107	-19.5312	-12.207	-7.32422	-6.71387	-5.49316	7.32422	16.4795	53.7109	89.7217	166.016	245.361	341.187
119.5	-34.1797	-14.0381	-12.207	-6.71387	-12.8174	-1.83105	2.44141	16.4795	48.8281	96.4355	167.236	253.906	347.9
119.6	-32.959	-15.2588	-9.76562	-9.76562	-4.27246	-1.83105	3.05176	14.0381	53.7109	90.9424	170.898	253.296	353.394
119.7	-39.0625	-24.4141	-9.76562	-12.207	-6.71387	-4.27246	-1.83105	14.6484	59.2041	96.4355	165.405	256.348	358.887
119.8	-36.0107	-16.4795	-9.15527	-6.10352	-7.93457	-2.44141	4.27246	7.32422	51.2695	96.4355	165.405	259.399	349.121
119.9	-34.79	-23.8037	-9.15527	-6.71387	-8.54492	0.610352	2.44141	14.6484	56.1523	92.7734	173.95	269.165	365.601
120	-31.1279	-20.1416	-9.76562	-12.207	-9.76562	-0.610352	6.71387	18.3105	48.8281	101.318	168.457	264.282	365.601
120.1	-32.959	-18.3105	-14.6484	-6.10352	-4.27246	-1.83105	-0.610352	20.752	54.3213	100.708	173.95	267.334	366.821
120.2	-32.3486	-14.0381	-12.8174	-7.93457	-13.4277	-2.44141	3.66211	21.9727	53.7109	102.539	177.002	270.386	360.718
120.3	-34.79	-22.583	-15.8691	-7.93457	-9.76562	4.27246	9.15527	20.1416	52.4902	94.6045	177.002	277.71	368.042
120.4	-36.6211	-20.1416	-8.54492	-7.32422	-10.9863	-1.83105	1.83105	14.6484	51.2695	99.4873	180.054	276.489	360.107
120.5	-34.1797	-16.4795	-14.6484	-7.32422	-4.27246	-4.88281	2.44141	14.0381	57.9834	95.2148	180.664	274.658	363.77
120.6	-32.959	-18.3105	-11.5967	-10.9863	-12.207	-2.44141	7.32422	19.5312	50.0488	98.877	187.378	273.438	367.432
120.7	-35.4004	-23.8037	-10.9863	-10.9863	-6.10352	-0.610352	2.44141	18.9209	49.4385	98.877	180.664	272.827	374.146
120.8	-34.1797	-14.6484	-14.6484	-4.88281	-8.54492	6.71387	2.44141	20.1416	51.8799	98.2666	184.326	278.931	369.873
120.9	-32.959	-16.4795	-10.376	-9.76562	-14.0381	1.83105	0	17.0898	53.1006	107.422	187.378	281.372	369.263
121	-34.79	-13.4277	-11.5967	-7.32422	-9.15527	-1.2207	2.44141	18.3105	52.4902	105.591	181.885	280.762	371.094
121.1	-34.79	-16.4795	-11.5967	-10.9863	-8.54492	-1.83105	-4.88281	14.6484	54.9316	101.318	187.378	286.255	366.211
121.2	-35.4004	-19.5312	-10.9863	-11.5967	-4.88281	-6.71387	3.66211	17.7002	59.2041	101.929	181.885	285.645	368.042
121.3	-32.959	-17.7002	-12.8174	-7.32422	-12.207	-2.44141	4.88281	15.2588	52.4902	106.201	189.209	281.982	366.211
121.4	-33.5693	-21.3623	-4.88281	-10.376	-10.9863	5.49316	-4.88281	21.9727	54.9316	111.694	188.599	289.917	371.704
121.5	-31.7383	-15.8691	-10.9863	-3.66211	-6.71387	-2.44141	4.27246	20.752	57.373	111.694	192.261	287.476	374.146
121.6	-33.5693	-18.9209	-10.376	-3.66211	-8.54492	4.27246	0	18.9209	55.542	105.591	193.481	290.527	367.432
121.7	-33.5693	-18.9209	-10.9863	-7.32422	-10.376	3.66211	-2.44141	24.4141	53.7109	115.967	198.975	296.631	375.366
121.8	-39.0625	-16.4795	-17.0898	-10.376	-5.49316	1.2207	1.2207	18.3105	55.542	109.863	195.923	295.41	384.521
121.9	-37.2314	-28.6865	-9.15527	-9.76562	-10.9863	-2.44141	1.83105	15.8691	54.3213	110.474	196.533	294.8	377.197
122	-40.2832	-17.7002	-10.9863	-4.88281	-9.15527	-0.610352	7.32422	21.3623	56.1523	113.525	193.481	303.955	383.301
122.1	-36.6211	-16.4795	-7.93457	-8.54492	-9.76562	-3.66211	0	24.4141	56.7627	116.577	200.806	300.903	390.625
122.2	-33.5693	-14.0381	-15.2588	-9.15527	-3.66211	-1.2207	10.9863	19.5312	57.9834	114.746	198.975	306.396	396.729
122.3	-29.2969	-16.4795	-6.71387	-9.15527	-5.49316	-6.10352	2.44141	21.3623	59.2041	122.07	205.688	305.176	391.846
122.4	-34.1797	-20.1416	-11.5967	-10.9863	-5.49316	-6.10352	6.71387	17.7002	57.9834	117.798	198.364	311.89	399.17
122.5	-38.4521	-21.9727	-7.93457	-12.207	-8.54492	-4.27246	-5.49316	28.0762	56.7627	126.953	194.702	309.448	401.611
122.6	-35.4004	-25.6348	-4.88281	-7.32422	-6.10352	-2.44141	4.27246	28.0762	60.4248	114.136	203.247	311.89	398.56
122.7	-37.2314	-20.752	-12.8174	-8.54492	-4.88281	-3.05176	6.10352	23.8037	62.8662	121.46	200.195	313.721	404.663
122.8	-30.5176	-17.0898	-9.76562	-7.93457	-10.376	0.610352	6.71387	26.8555	58.5938	125.122	200.806	312.5	406.494
122.9	-34.79	-12.8174	-12.207	-4.27246	-6.10352	-1.83105	9.76562	23.1934	60.4248	125.732	206.909	320.435	408.325
123	-36.0107	-18.3105	-9.15527	-4.88281	-12.8174	-2.44141	7.32422	29.2969	64.6973	117.798	206.909	321.045	410.156
123.1	-29.2969	-15.8691	-14.0381	-8.54492	-5.49316	0.610352	1.2207	23.1934	62.8662	129.395	207.52	319.824	410.767
123.2	-37.8418	-18.3105	-9.76562	-7.93457	-8.54492	0.610352	7.93457	21.9727	59.8145	128.784	199.585	321.045	410.767
123.3	-38.4521	-17.0898	-9.76562	-6.10352	-5.49316	-0.610352	4.27246	27.4658	68.9697	128.174	206.909	325.928	418.091
123.4	-29.9072	-17.7002	-12.207	-5.49316	-9.76562	-1.83105	4.88281	29.9072	64.0869	123.291	206.299	323.486	414.429
123.5	-32.959	-20.752	-10.376	-10.376	-13.4277	-1.2207	7.93457	23.1934	58.5938	126.343	209.961	325.928	416.26
123.6	-35.4004	-12.207	-9.76562	-1.83105	-3.66211	-3.05176	3.66211	20.752	68.9697	132.446	208.13	326.538	416.26
123.7	-33.5693	-23.1934	-12.207	-5.49316	0	3.66211	5.49316	28.6865	64.6973	128.174	211.792	324.707	426.636
123.8	-36.6211	-20.752	-9.15527	-6.10352	-3.66211	-2.44141	14.6484	28.0762	64.6973	130.615	213.623	329.59	420.532
123.9	-31.1279	-20.1416	-10.9863	-4.88281	-4.88281	-1.2207	10.376	29.9072	65.918	129.395	208.74	317.383	429.688
124	-36.6211	-15.8691	-6.71387	-1.83105	-5.49316	-1.2207	4.88281	28.0762	67.1387	133.667	214.844	322.876	426.636
124.1	-31.7383	-17.7002	-10.376	-6.71387	-7.32422	-2.44141	12.207	28.6865	65.918	126.343	215.454	324.707	441.284
124.2	-30.5176	-17.7002	-15.8691	-12.8174	-2.44141	1.2207	15.2588	27.4658	68.3594	133.667	208.74	329.59	435.181
124.3	-31.1279	-18.3105	-10.9863	-7.93457	-8.54492	-3.05176	6.71387	20.752	68.9697	131.836	216.675	337.524	433.35
124.4	-32.959	-18.3105	-9.76562	-6.10352	-9.15527	-3.05176	3.05176	23.1934	65.3076	141.602	216.064	329.59	437.012
124.5	-28.6865	-16.4795	-10.9863	-10.9863	-7.32422	-3.66211	6.71387	24.4141	65.3076	139.16	214.233	333.252	435.181
124.6	-36.6211	-19.5312	-12.8174	-4.88281	0	2.44141	8.54492	19.5312	70.1904	143.433	215.454	338.135	434.57
124.7	-29.2969	-23.1934	-8.54492	-7.93457	-4.88281	1.83105	11.5967	29.9072	66.5283	140.991	213.623	341.797	440.063
124.8	-38.4521	-18.3105	-6.71387	-8.54492	-7.93457	-3.66211	4.88281	29.9072	68.9697	147.705	216.675	346.069	438.232
124.9	-33.5693	-22.583	-10.9863	-12.207	-5.49316	-3.05176	9.15527	26.8555	73.8525	150.146	217.285	346.68	441.895
125	-31.1279	-17.0898	-9.76562	-9.76562	-7.32422	3.66211	14.6484	25.6348	73.8525	147.705	220.947	345.459	445.557
125.1	-31.1279	-15.8691	-8.54492	-9.15527	-6.10352	-0.610352	5.49316	23.8037	82.3975	150.146	220.337	349.121	452.881
125.2	-34.79	-17.0898	-12.207	-7.93457	-4.27246	1.2207	17.0898	21.9727	81.1768	151.367	225.22	338.135	447.998
125.3	-42.7246	-17.0898	-7.93457	-9.76562	-4.27246	6.10352	6.71387	26.8555	81.7871	153.809	220.337	344.238	448.608
125.4	-31.7383	-14.6484	-9.15527	-7.32422	-0.610352	-7.93457	9.15527	25.6348	81.1768	144.653	220.947	340.576	452.271
125.5	-34.79	-18.3105	-13.4277	-12.207	-3.66211	-2.44141	12.8174	31.1279	79.3457	148.315	225.22	346.069	455.933
125.6	-29.9072	-21.9727	-14.0381	-7.93457	-6.10352	-1.2207	6.71387	26.8555	72.0215	155.029	228.271	350.342	461.426
125.7	-30.5176	-13.4277	-7.32422	-7.32422	-3.66211	0	4.88281	30.5176	81.1768	156.86	235.596	349.121	458.984
125.8	-37.8418	-14.0381	-10.9863	-10.376	-5.49316	-1.2207	2.44141	20.752	86.0596	158.691	227.051	350.342	465.698
125.9	-32.3486	-17.0898	-7.32422	-6.71387	-11.5967	1.2207	5.49316	21.3623	79.9561	157.471	233.765	350.952	465.088
126	-28.6865	-12.8174	-9.15527	-9.15527	-4.27246	-3.05176	10.9863	31.7383	83.0078	161.743	235.596	353.394	463.867
126.1	-36.6211	-17.0898	-15.8691	-9.15527	-10.376	3.05176	9.76562	23.1934	76.2939	157.471	239.258	360.107	463.867
126.2	-30.5176	-17.0898	-7.93457	-3.05176	-4.27246	-4.88281	7.93457	25.0244	76.9043	158.691	237.427	360.107	472.412
126.3	-31.1279	-20.1416	-9.76562	-13.4277	-4.88281	-3.66211	14.0381	33.5693	80.5664	157.471	240.479	362.549	473.022
126.4	-32.959	-14.6484	-15.2588	-9.15527	-8.54492	0	16.4795	29.9072	78.7354	157.471	236.816	364.99	475.464
126.5	-26.2451	-12.8174	-12.8174	-3.05176	-5.49316	1.83105	9.76562	31.7383	81.7871	158.691	242.31	368.042	480.957
126.6	-29.9072	-18.3105	-15.2588	-8.54492	-7.93457	-6.10352	7.32422	31.7383	83.6182	161.133	239.868	370.483	483.398
126.7	-35.4004	-21.3623	-14.0381	-10.9863	-4.88281	-6.10352	7.93457	28.6865	82.3975	161.133	247.192	374.756	484.009
126.8	-36.0107	-20.752	-8.54492	-10.9863	-3.05176	-1.83105	13.4277	31.1279	92.1631	161.133	250.244	372.925	488.281
126.9	-31.7383	-20.1416	-6.71387	-10.9863	-9.76562	-0.610352	12.207	30.5176	83.0078	152.588	253.296	366.211	498.047
127	-32.959	-18.3105	-13.4277	-4.27246	-4.27246	5.49316	7.32422	26.8555	90.9424	158.081	248.413	379.028	494.995
127.1	-32.959	-15.8691	-10.376	-11.5967	-6.10352	-2.44141	15.2588	37.2314	87.8906	161.743	250.854	371.704	495.605
127.2	-30.5176	-20.1416	-9.15527	-10.9863	-8.54492	-3.05176	9.15527	31.7383	90.332	158.081	249.023	380.859	499.268
127.3	-32.959	-18.9209	-14.6484	-5.49316	-9.76562	-4.27246	10.9863	29.9072	84.2285	161.743	250.244	384.521	496.216
127.4	-28.6865	-21.9727	-10.9863	-9.15527	-5.49316	0.610352	14.0381	31.7383	90.332	162.964	260.01	387.573	502.93
127.5	-36.6211	-20.1416	-10.9863	-7.93457	-6.10352	-0.610352	12.207	34.1797	89.7217	164.185	255.737	380.249	507.812
127.6	-39.0625	-21.9727	-10.376	-6.10352	-9.15527	1.83105	10.376	33.5693	93.3838	169.678	260.01	383.911	510.864
127.7	-34.79	-18.9209	-12.207	-9.76562	-4.88281	2.44141	9.15527	32.3486	87.2803	168.457	268.555	383.301	513.916
127.8	-39.6729	-19.5312	-14.6484	-6.10352	-5.49316	-1.83105	9.15527	34.1797	88.501	168.457	269.165	391.235	513.306
127.9	-33.5693	-16.4795	-11.5967	-3.05176	-4.88281	-5.49316	14.0381	29.2969	87.2803	167.236	267.334	379.028	513.306
128	-37.2314	-24.4141	-9.15527	-6.10352	-7.32422	-1.83105	10.9863	33.5693	85.4492	166.016	258.179	385.742	514.526
128.1	-28.0762	-17.0898	-15.2588	-14.0381	-3.66211	-3.66211	12.8174	39.0625	90.332	173.34	267.944	393.677	515.137
128.2	-33.5693	-20.1416	-10.376	-8.54492	-3.05176	-3.05176	9.76562	36.6211	87.8906	171.509	266.113	393.677	521.851
128.3	-32.3486	-21.3623	-9.76562	-7.93457	-8.54492	6.71387	10.9863	32.959	83.6182	165.405	269.775	392.456	525.513
128.4	-34.79	-17.0898	-13.4277	-12.207	-5.49316	-2.44141	14.0381	39.6729	86.0596	174.561	277.71	392.456	526.123
128.5	-32.959	-20.1416	-12.207	-9.76562	-7.93457	7.93457	14.0381	36.6211	86.0596	167.236	277.71	396.729	527.954
128.6	-31.7383	-17.7002	-11.5967	-8.54492	-7.32422	-0.610352	16.4795	29.2969	86.6699	172.119	276.489	389.404	517.578
128.7	-30.5176	-20.1416	-11.5967	-9.76562	-7.93457	6.10352	12.8174	37.8418	84.8389	175.171	280.762	394.897	524.902
128.8	-32.3486	-17.0898	-14.0381	-9.76562	-2.44141	1.2207	14.0381	35.4004	90.9424	177.002	278.32	404.663	524.902
128.9	-35.4004	-15.8691	-12.207	-10.9863	-11.5967	-2.44141	17.0898	33.5693	89.1113	175.171	280.151	403.442	527.344
129	-28.6865	-14.6484	-6.10352	-6.71387	-6.71387	6.10352	15.2588	37.2314	94.6045	181.274	282.593	399.17	524.292
129.1	-25.6348	-17.0898	-12.8174	-5.49316	-6.10352	0	9.76562	34.1797	89.7217	177.612	284.424	395.508	527.954
129.2	-31.7383	-18.9209	-15.8691	-3.66211	-6.10352	-0.610352	15.8691	37.8418	84.8389	182.495	281.982	399.78	521.851
129.3	-34.1797	-21.3623	-12.8174	-8.54492	-7.32422	1.83105	14.0381	40.8936	89.7217	180.664	280.762	404.663	524.902
129.4	-31.1279	-18.9209	-15.8691	-14.0381	-3.66211	1.2207	13.4277	42.1143	97.0459	188.599	286.255	403.442	534.058
129.5	-32.959	-14.0381	-10.9863	-4.88281	-4.27246	3.66211	13.4277	44.5557	98.877	187.988	291.138	410.156	529.785
129.6	-30.5176	-18.3105	-9.15527	-9.76562	-7.93457	-2.44141	14.6484	42.7246	92.7734	185.547	278.931	406.494	535.278
129.7	-37.2314	-19.5312	-15.2588	-8.54492	-10.376	0.610352	23.8037	40.2832	98.877	189.819	283.203	411.987	546.265
129.8	-34.79	-17.7002	-10.9863	-4.88281	-3.66211	-1.2207	21.9727	43.9453	101.318	189.209	289.307	413.208	537.109
129.9	-36.0107	-20.1416	-13.4277	-10.9863	-4.88281	-0.610352	21.9727	46.9971	97.0459	186.157	289.307	418.701	539.551
130	-33.5693	-18.9209	-12.207	-1.2207	-12.207	6.10352	19.5312	49.4385	97.6562	187.988	289.307	419.312	543.213
130.1	-41.5039	-17.0898	-8.54492	-9.76562	-4.88281	3.66211	19.5312	44.5557	98.2666	187.378	289.917	421.143	542.603
130.2	-35.4004	-20.752	-11.5967	-8.54492	-4.27246	-1.2207	21.9727	48.8281	98.877	194.092	291.748	416.87	543.823
130.3	-39.0625	-17.0898	-16.4795	-11.5967	-4.88281	-3.05176	18.3105	45.7764	106.201	196.533	292.358	424.805	551.758
130.4	-38.4521	-15.8691	-9.76562	-5.49316	-6.10352	9.15527	18.3105	42.7246	104.37	193.481	286.865	423.584	549.927
130.5	-32.3486	-17.7002	-9.15527	-11.5967	-0.610352	0	18.9209	50.0488	106.812	200.806	293.579	432.739	559.082
130.6	-32.959	-20.1416	-13.4277	-12.207	-9.15527	0.610352	18.9209	45.166	100.098	200.806	294.8	430.908	557.251
130.7	-37.8418	-14.6484	-9.15527	-7.32422	-5.49316	5.49316	18.9209	46.9971	105.591	199.585	298.462	430.908	552.368
130.8	-39.0625	-19.5312	-12.8174	-10.9863	-9.76562	0.610352	16.4795	48.8281	109.253	201.416	299.683	440.063	551.147
130.9	-39.0625	-20.752	-7.32422	-7.93457	-12.207	0	18.9209	46.3867	111.694	200.195	295.41	443.115	561.523
131	-39.6729	-14.6484	-9.15527	-9.15527	-4.88281	3.66211	18.3105	50.6592	109.253	206.299	303.345	440.063	560.913
131.1	-39.0625	-25.6348	-14.6484	-10.376	-4.27246	9.15527	17.0898	52.4902	102.539	205.078	303.345	441.284	567.017
131.2	-35.4004	-20.752	-15.8691	-1.83105	-9.15527	0	20.1416	45.7764	107.422	208.74	302.734	446.167	566.406
131.3	-37.8418	-23.1934	-6.10352	-6.71387	-6.71387	0.610352	12.8174	49.4385	106.812	213.013	306.396	441.284	566.406
131.4	-31.1279	-17.7002	-9.15527	-1.83105	-1.2207	1.2207	15.8691	44.5557	107.422	214.844	299.072	443.115	571.289
131.5	-37.2314	-25.6348	-10.9863	-9.15527	-6.71387	0.610352	15.2588	49.4385	111.694	214.233	308.228	443.115	573.73
131.6	-39.0625	-18.3105	-16.4795	-12.8174	-0.610352	0	14.6484	43.9453	106.812	209.351	307.007	444.946	573.73
131.7	-36.6211	-20.1416	-12.207	-9.76562	-3.66211	-2.44141	17.0898	51.8799	105.591	209.961	313.11	443.115	577.393
131.8	-34.1797	-18.9209	-12.207	-7.93457	-1.2207	-4.27246	18.3105	52.4902	109.253	210.571	311.89	446.167	571.289
131.9	-36.6211	-19.5312	-12.207	-9.76562	-7.93457	3.66211	19.5312	51.8799	109.863	217.285	310.059	451.66	574.951
132	-41.5039	-14.6484	-6.71387	-10.376	-4.27246	4.88281	20.752	39.6729	104.37	220.337	313.721	444.946	570.679
132.1	-35.4004	-19.5312	-13.4277	-14.0381	-7.32422	4.27246	25.6348	48.2178	108.032	219.727	307.617	451.66	579.834
132.2	-41.5039	-17.0898	-3.66211	-6.71387	-1.83105	7.32422	16.4795	52.4902	108.032	218.506	311.279	451.66	581.665
132.3	-36.0107	-13.4277	-9.76562	-6.10352	-3.66211	3.05176	20.752	49.4385	112.915	222.778	316.772	446.167	577.393
132.4	-37.8418	-14.6484	-12.207	-8.54492	-9.15527	6.10352	17.7002	51.2695	111.694	225.83	322.266	458.374	576.782
132.5	-35.4004	-17.0898	-11.5967	-3.66211	-6.10352	0.610352	21.9727	51.8799	115.967	222.168	316.162	460.815	575.562
132.6	-37.8418	-23.1934	-12.8174	-8.54492	-4.88281	0	24.4141	46.9971	109.863	223.389	315.552	461.426	581.665
132.7	-35.4004	-18.3105	-10.376	-7.32422	0.610352	2.44141	20.752	48.2178	114.136	223.999	319.214	464.478	585.938
132.8	-39.0625	-18.3105	-15.8691	-7.93457	-3.05176	1.2207	16.4795	50.0488	115.356	224.609	319.824	466.309	590.21
132.9	-37.2314	-21.3623	-14.0381	-6.71387	-1.2207	4.88281	18.3105	57.9834	118.408	231.934	326.538	465.088	591.431
133	-36.6211	-15.2588	-12.8174	-5.49316	-6.10352	4.88281	24.4141	53.7109	117.188	228.271	332.031	471.802	593.872
133.1	-36.0107	-18.3105	-12.8174	-7.32422	-3.05176	2.44141	21.9727	54.3213	119.629	233.765	336.914	474.243	597.534
133.2	-32.3486	-19.5312	-14.6484	-7.32422	-7.93457	3.05176	20.752	51.8799	119.629	234.375	328.979	477.295	591.431
133.3	-33.5693	-20.1416	-10.376	-8.54492	-5.49316	1.2207	22.583	48.2178	117.798	231.934	333.862	478.516	598.145
133.4	-32.959	-17.7002	-12.207	-7.32422	-3.66211	3.05176	19.5312	53.1006	118.408	235.596	332.031	479.126	593.262
133.5	-32.3486	-25.0244	-15.8691	-10.376	0	4.88281	23.1934	54.9316	116.577	237.427	328.979	478.516	601.196
133.6	-35.4004	-18.9209	-8.54492	-7.93457	-2.44141	1.83105	17.0898	57.373	120.239	236.206	335.693	478.516	599.365
133.7	-36.0107	-17.7002	-15.2588	-4.88281	-4.27246	2.44141	13.4277	57.373	125.122	242.31	333.252	482.178	599.976
133.8	-36.0107	-21.3623	-9.15527	-7.32422	-5.49316	1.2207	20.1416	54.9316	125.122	236.816	335.083	481.567	603.638
133.9	-36.6211	-20.752	-10.9863	-12.207	-3.05176	2.44141	17.7002	57.9834	129.395	237.427	339.355	482.788	613.403
134	-34.1797	-18.3105	-12.207	-4.88281	-3.05176	4.27246	19.5312	56.7627	126.343	244.751	339.966	485.84	611.572
134.1	-32.959	-16.4795	-11.5967	-3.66211	-6.10352	2.44141	18.9209	61.6455	128.174	242.31	341.187	485.84	609.131
134.2	-38.4521	-18.3105	-9.15527	-9.15527	-4.88281	6.71387	15.8691	66.5283	129.395	240.479	348.511	494.995	613.403
134.3	-37.8418	-18.3105	-17.0898	-7.32422	-3.05176	5.49316	20.1416	54.3213	134.277	238.037	350.952	498.047	613.403
134.4	-32.959	-16.4795	-7.32422	-11.5967	-2.44141	12.8174	23.8037	55.542	136.719	242.92	349.731	495.605	612.793
134.5	-36.6211	-21.3623	-12.207	-4.27246	-2.44141	1.83105	25.6348	58.5938	133.667	244.751	349.121	499.268	615.234
134.6	-32.3486	-17.0898	-8.54492	-9.15527	-1.2207	6.10352	20.1416	59.8145	134.888	239.868	347.9	507.812	616.455
134.7	-37.2314	-18.9209	-7.93457	-11.5967	-4.27246	10.9863	23.8037	55.542	131.226	242.92	355.225	508.423	621.338
134.8	-34.1797	-15.2588	-14.0381	-7.93457	-9.76562	-1.2207	20.1416	57.373	134.888	249.023	359.497	509.644	625.61
134.9	-31.7383	-17.0898	-10.376	-6.10352	-3.05176	4.27246	25.6348	56.1523	124.512	250.244	364.38	510.254	619.507
135	-32.3486	-18.9209	-16.4795	-3.05176	-4.88281	6.10352	17.7002	53.1006	131.836	249.023	360.718	512.085	621.948
135.1	-33.5693	-19.5312	-7.32422	-3.66211	0.610352	7.32422	28.0762	61.0352	132.446	252.686	367.432	515.137	625.61
135.2	-31.1279	-18.9209	-12.207	-7.32422	-1.2207	1.83105	22.583	56.7627	133.057	256.958	366.821	515.137	629.272
135.3	-34.79	-19.5312	-12.8174	-4.27246	-2.44141	4.88281	21.9727	53.1006	132.446	253.296	372.925	516.357	629.883
135.4	-30.5176	-15.2588	-15.8691	-4.27246	-4.27246	-1.83105	24.4141	52.4902	131.836	249.023	375.366	512.695	638.428
135.5	-37.8418	-14.0381	-12.8174	-9.76562	-4.27246	4.88281	22.583	66.5283	128.784	249.023	369.873	515.137	640.259
135.6	-42.1143	-14.6484	-16.4795	-3.66211	-1.83105	3.05176	25.6348	58.5938	136.108	254.517	377.197	516.357	646.973
135.7	-42.1143	-23.1934	-13.4277	-12.8174	-0.610352	4.88281	21.3623	59.8145	139.771	255.737	369.263	517.578	653.687
135.8	-32.959	-19.5312	-10.376	-7.32422	-9.76562	4.27246	30.5176	61.0352	142.822	255.737	374.756	519.409	651.855
135.9	-39.0625	-25.0244	-12.207	-3.66211	-3.05176	7.93457	23.8037	56.7627	136.719	257.568	372.314	516.357	654.297
136	-34.1797	-20.752	-12.207	-10.376	-6.71387	2.44141	18.3105	60.4248	139.16	253.906	373.535	520.63	649.414
136.1	-29.9072	-15.2588	-14.0381	-6.71387	-3.66211	-0.610352	22.583	53.7109	137.329	259.399	374.146	524.292	658.569
136.2	-33.5693	-16.4795	-13.4277	-4.88281	-4.27246	12.207	29.9072	60.4248	138.55	257.568	372.314	523.682	662.842
136.3	-34.1797	-17.0898	-9.76562	-3.05176	-7.93457	6.10352	31.1279	65.3076	139.16	259.399	381.47	522.461	671.387
136.4	-38.4521	-23.1934	-9.76562	-8.54492	-6.10352	8.54492	23.8037	56.7627	142.822	261.23	386.353	525.513	665.894
136.5	-40.8936	-20.752	-10.376	-3.66211	-3.05176	8.54492	23.1934	56.1523	141.602	262.451	383.911	524.292	669.556
136.6	-37.2314	-13.4277	-9.15527	-7.93457	1.83105	4.88281	23.8037	57.373	139.771	262.451	383.301	524.292	676.27
136.7	-34.79	-16.4795	-12.207	-7.32422	0	6.71387	28.6865	59.8145	134.888	267.944	385.132	524.292	675.659
136.8	-31.1279	-19.5312	-9.76562	-12.207	-3.66211	3.05176	28.0762	61.0352	142.822	264.893	391.235	518.799	681.152
136.9	-41.5039	-17.7002	-10.9863	-6.71387	1.83105	14.0381	26.8555	64.0869	139.16	267.944	383.911	524.902	679.321
137	-30.5176	-23.8037	-11.5967	-6.71387	-1.2207	9.76562	23.8037	61.0352	139.16	270.996	390.625	527.954	685.425
137.1	-39.0625	-21.9727	-7.32422	-1.2207	-7.93457	10.376	23.8037	59.2041	140.991	266.113	394.897	525.513	675.049
137.2	-38.4521	-15.2588	-9.76562	-7.32422	-7.32422	6.71387	28.6865	62.2559	135.498	275.879	400.391	534.058	679.932
137.3	-38.4521	-18.9209	-15.8691	-12.8174	-9.15527	6.10352	28.6865	57.373	139.771	271.606	399.17	537.72	684.204
137.4	-42.7246	-20.1416	-10.9863	-9.15527	1.2207	5.49316	26.8555	62.2559	142.822	271.606	402.832	538.94	684.814
137.5	-37.8418	-14.0381	-7.93457	-6.10352	-3.66211	12.207	23.1934	65.3076	143.433	269.165	399.78	540.771	686.035
137.6	-31.1279	-22.583	-13.4277	-4.88281	-0.610352	4.88281	27.4658	62.8662	141.602	272.827	407.715	539.551	687.866
137.7	-37.2314	-19.5312	-14.0381	-10.9863	-7.93457	9.76562	28.0762	64.6973	149.536	281.982	411.987	546.265	690.308
137.8	-31.1279	-12.8174	-9.76562	-9.15527	-2.44141	9.76562	31.7383	63.4766	146.484	278.32	413.818	548.096	698.242
137.9	-36.0107	-22.583	-15.2588	-9.15527	1.2207	14.6484	25.0244	67.1387	147.705	279.541	410.156	542.603	689.087
138	-36.0107	-14.6484	-11.5967	-3.66211	0	4.88281	30.5176	64.6973	149.536	269.775	407.104	547.485	692.749
138.1	-34.79	-17.0898	-9.15527	-10.376	-0.610352	6.71387	32.3486	66.5283	141.602	277.71	413.818	547.485	695.19
138.2	-35.4004	-23.8037	-14.0381	-9.76562	-3.66211	7.93457	28.6865	68.9697	139.771	277.71	416.26	541.992	708.008
138.3	-37.8418	-19.5312	-10.376	-8.54492	3.05176	12.207	22.583	67.1387	147.705	278.931	409.546	544.434	700.073
138.4	-35.4004	-17.0898	-10.376	-3.66211	-1.2207	9.76562	23.8037	69.5801	147.095	280.762	413.208	541.992	701.904
138.5	-31.7383	-25.0244	-7.93457	-7.32422	-2.44141	8.54492	27.4658	67.1387	146.484	282.593	418.701	544.434	707.397
138.6	-37.2314	-20.1416	-9.76562	-7.93457	1.83105	4.27246	24.4141	61.0352	151.978	280.151	422.974	551.758	704.346
138.7	-37.2314	-19.5312	-14.6484	-3.66211	-1.83105	9.76562	23.1934	63.4766	145.874	279.541	420.532	547.485	712.891
138.8	-41.5039	-15.8691	-13.4277	-7.93457	-3.05176	7.32422	32.3486	68.9697	150.146	277.1	418.091	553.589	715.942
138.9	-37.8418	-20.1416	-11.5967	-5.49316	-4.27246	6.71387	29.2969	74.4629	148.315	282.593	422.974	557.861	719.604
139	-40.8936	-14.6484	-15.2588	-9.15527	-6.10352	3.66211	25.0244	65.918	152.588	283.813	415.649	556.641	716.553
139.1	-40.2832	-15.8691	-15.8691	-8.54492	-6.10352	4.88281	27.4658	72.0215	155.029	285.645	429.077	556.641	718.994
139.2	-31.7383	-20.1416	-11.5967	-10.9863	-0.610352	6.10352	28.0762	70.1904	146.484	282.593	430.908	558.472	720.215
139.3	-40.8936	-18.9209	-7.93457	-5.49316	1.83105	3.66211	28.6865	72.0215	158.691	283.203	427.246	560.913	714.722
139.4	-31.7383	-23.8037	-14.0381	-10.9863	-6.10352	10.376	32.3486	67.1387	156.25	290.527	430.298	561.523	718.994
139.5	-38.4521	-24.4141	-13.4277	-9.76562	1.2207	2.44141	31.1279	73.8525	160.522	284.424	434.57	563.965	727.539
139.6	-31.7383	-17.7002	-9.15527	-6.10352	-1.2207	3.66211	34.79	71.4111	156.25	290.527	431.519	560.913	720.215
139.7	-36.6211	-18.3105	-10.376	-7.32422	-2.44141	6.71387	31.7383	68.3594	159.302	292.358	435.791	569.458	722.046
139.8	-36.6211	-17.0898	-10.9863	-5.49316	-0.610352	10.9863	35.4004	74.4629	166.016	285.034	434.57	569.458	723.267
139.9	-36.0107	-19.5312	-12.8174	-6.10352	-1.2207	6.71387	32.959	75.6836	168.457	297.852	444.336	573.12	722.656
140	-34.79	-21.9727	-17.0898	-6.71387	-4.27246	6.10352	36.0107	75.6836	164.795	295.41	446.777	575.562	721.436
140.1	-37.2314	-18.3105	-10.376	-10.9863	-2.44141	7.93457	39.0625	76.2939	173.34	300.903	442.505	570.068	741.577
140.2	-35.4004	-20.752	-14.0381	-3.05176	-4.88281	6.71387	36.0107	68.3594	172.119	298.462	440.674	573.73	739.746
140.3	-32.3486	-19.5312	-14.0381	-8.54492	-9.15527	10.376	37.2314	78.125	167.847	304.565	446.777	584.717	737.305
140.4	-34.1797	-18.3105	-9.76562	-6.71387	-4.27246	3.66211	29.2969	73.2422	167.236	305.176	449.829	574.341	740.967
140.5	-29.2969	-17.0898	-12.207	-7.32422	-3.66211	2.44141	38.4521	68.3594	169.678	302.124	448.608	581.665	745.239
140.6	-31.7383	-17.7002	-11.5967	-9.15527	-2.44141	3.66211	36.0107	72.6318	167.847	297.852	452.271	583.496	748.901
140.7	-31.1279	-18.3105	-9.15527	-7.32422	-7.32422	3.05176	43.9453	73.8525	166.016	302.124	456.543	590.21	751.953
140.8	-34.1797	-16.4795	-17.7002	-3.05176	-0.610352	5.49316	38.4521	71.4111	171.509	301.514	457.764	584.717	755.615
140.9	-28.6865	-18.9209	-10.376	-2.44141	-3.66211	9.15527	36.6211	75.6836	167.847	302.124	458.374	587.158	758.667
141	-33.5693	-17.0898	-15.8691	-6.71387	-3.05176	9.15527	34.79	76.9043	173.95	310.669	456.543	592.651	756.226
141.1	-32.3486	-18.3105	-10.9863	-6.71387	2.44141	3.05176	39.6729	76.9043	170.288	301.514	461.426	590.82	762.939
141.2	-32.3486	-23.8037	-12.8174	-6.10352	3.05176	4.88281	36.0107	76.9043	167.236	307.617	463.257	591.431	765.381
141.3	-32.3486	-17.7002	-10.9863	-5.49316	-5.49316	10.9863	36.0107	79.9561	176.392	310.669	457.764	596.313	762.329
141.4	-31.7383	-15.8691	-13.4277	-8.54492	-1.2207	10.376	37.8418	81.7871	178.223	307.007	463.257	596.924	765.991
141.5	-24.4141	-23.1934	-7.32422	-7.93457	-0.610352	3.66211	38.4521	78.125	175.781	315.552	462.036	597.534	769.653
141.6	-33.5693	-18.3105	-16.4795	-10.376	-0.610352	10.376	43.9453	78.125	177.612	312.5	461.426	596.313	767.212
141.7	-35.4004	-18.3105	-9.15527	-10.376	0	9.76562	46.9971	73.8525	177.002	311.89	461.426	595.093	770.874
141.8	-31.1279	-15.8691	-10.9863	-1.2207	-0.610352	3.66211	41.5039	85.4492	173.34	310.669	468.75	601.196	772.095
141.9	-28.6865	-21.9727	-7.93457	-11.5967	-4.88281	10.9863	43.9453	87.8906	177.612	316.772	465.698	599.976	778.198
142	-35.4004	-17.7002	-7.32422	-0.610352	-3.05176	7.93457	42.7246	85.4492	177.002	316.772	469.36	607.3	778.809
142.1	-33.5693	-22.583	-6.71387	-9.15527	-1.2207	10.9863	39.0625	84.8389	177.612	312.5	467.529	606.689	783.081
142.2	-40.2832	-25.0244	-11.5967	-9.76562	-1.83105	9.15527	39.0625	81.1768	180.054	312.5	466.309	607.3	779.419
142.3	-40.8936	-20.752	-10.376	-9.15527	-0.610352	10.376	36.6211	81.7871	178.833	316.772	466.919	605.469	787.354
142.4	-32.3486	-20.752	-9.76562	-7.32422	-5.49316	10.376	38.4521	84.2285	178.833	319.824	472.412	606.079	783.691
142.5	-28.6865	-20.1416	-12.207	-7.93457	1.83105	12.8174	42.7246	86.0596	185.547	321.045	473.633	613.403	776.367
142.6	-34.79	-19.5312	-9.76562	-6.10352	2.44141	12.207	40.8936	86.6699	189.819	325.317	468.75	612.793	780.029
142.7	-36.6211	-18.3105	-5.49316	-3.66211	-3.05176	9.15527	37.8418	88.501	181.274	321.655	469.36	610.962	778.809
142.8	-38.4521	-26.2451	-12.207	-4.27246	-3.66211	9.15527	42.1143	86.6699	186.157	320.435	471.191	616.455	783.081
142.9	-32.959	-19.5312	-9.15527	-7.93457	-0.610352	4.88281	38.4521	89.1113	189.209	324.707	476.074	618.896	786.743
143	-34.1797	-21.3623	-5.49316	-3.66211	3.66211	7.32422	36.0107	89.1113	186.157	317.993	473.022	616.455	780.64
143.1	-34.1797	-25.0244	-10.376	-6.10352	1.2207	9.76562	42.7246	91.5527	194.092	322.266	479.126	617.065	777.588
143.2	-35.4004	-18.9209	-11.5967	-0.610352	-1.83105	12.8174	40.8936	97.6562	195.312	324.097	482.178	620.117	786.133
143.3	-28.6865	-21.9727	-15.2588	-7.32422	2.44141	14.6484	43.335	97.0459	190.43	330.2	482.788	620.728	787.964
143.4	-36.0107	-19.5312	-7.32422	-3.05176	-0.610352	11.5967	36.6211	95.2148	187.988	328.979	485.84	618.896	794.678
143.5	-35.4004	-17.7002	-10.376	-9.15527	0.610352	10.9863	36.0107	90.332	198.975	330.2	487.671	623.779	791.016
143.6	-40.8936	-21.9727	-5.49316	-6.10352	-1.83105	10.376	39.6729	91.5527	197.144	332.031	487.671	623.169	789.795
143.7	-32.3486	-24.4141	-8.54492	-6.10352	-1.83105	12.8174	37.8418	96.4355	197.144	339.355	491.943	618.896	788.574
143.8	-31.1279	-25.0244	-7.32422	-3.66211	1.83105	9.76562	36.6211	98.2666	185.547	332.642	488.892	622.559	792.847
143.9	-28.6865	-23.1934	-10.9863	-14.6484	-1.2207	15.2588	39.0625	97.6562	195.923	335.693	490.112	621.948	796.509
144	-32.959	-25.6348	-7.93457	0.610352	1.2207	6.10352	39.0625	101.318	199.585	340.576	490.112	629.883	793.457
144.1	-29.9072	-15.2588	-12.207	-7.32422	-4.88281	19.5312	35.4004	89.7217	206.299	333.862	490.723	625.61	796.509
144.2	-34.1797	-21.3623	-11.5967	-1.83105	4.88281	12.207	40.2832	100.098	205.688	342.407	496.216	630.493	793.457
144.3	-31.1279	-14.0381	-9.76562	-1.2207	-0.610352	12.8174	39.0625	92.7734	198.364	344.849	499.878	629.272	794.678
144.4	-38.4521	-23.1934	-12.207	-3.05176	-4.88281	9.76562	38.4521	96.4355	205.078	344.849	506.592	632.935	797.729
144.5	-31.7383	-21.3623	-9.76562	-6.71387	-0.610352	9.76562	40.8936	98.877	202.026	344.849	501.709	632.935	790.405
144.6	-33.5693	-20.752	-9.76562	-9.76562	-4.88281	13.4277	41.5039	101.318	204.468	343.018	506.592	631.714	789.185
144.7	-34.1797	-20.752	-7.32422	-12.207	1.83105	12.207	43.335	98.2666	210.571	344.849	505.371	632.935	797.729
144.8	-36.6211	-15.8691	-7.32422	-6.10352	3.66211	12.207	46.3867	97.0459	203.857	351.562	502.93	637.207	792.236
144.9	-35.4004	-21.9727	-14.6484	-6.10352	-0.610352	9.76562	36.6211	103.149	205.688	341.187	508.423	643.921	790.405
145	-29.2969	-20.1416	-10.376	-9.15527	0	9.76562	44.5557	100.098	206.909	344.849	508.423	641.479	787.354
145.1	-32.959	-19.5312	-11.5967	-5.49316	1.83105	14.0381	45.7764	103.76	204.468	344.238	504.761	644.531	795.898
145.2	-37.8418	-19.5312	-8.54492	-4.88281	-4.88281	10.376	45.166	106.201	203.857	348.511	503.54	645.142	795.288
145.3	-32.959	-21.9727	-6.71387	-6.10352	-1.83105	14.0381	45.166	105.591	202.637	347.29	502.319	647.583	795.288
145.4	-36.6211	-21.9727	-6.71387	-6.71387	4.27246	17.0898	46.9971	111.084	202.637	353.394	504.15	650.635	800.171
145.5	-31.1279	-25.6348	-9.76562	-8.54492	-4.88281	15.2588	46.9971	111.084	212.402	351.562	508.423	652.466	802.002
145.6	-32.959	-22.583	-8.54492	-6.10352	3.05176	14.0381	43.9453	108.643	207.52	362.549	502.93	650.635	806.885
145.7	-32.3486	-15.2588	-7.93457	-4.88281	-4.88281	14.0381	49.4385	115.356	206.909	359.497	512.695	659.79	812.988
145.8	-29.9072	-20.1416	-6.71387	-4.88281	-4.88281	14.6484	48.2178	108.643	213.623	364.99	508.423	659.79	811.768
145.9	-30.5176	-21.9727	-4.88281	-1.83105	0	9.15527	51.2695	111.084	214.233	363.159	513.306	655.518	814.209
146	-36.6211	-18.9209	-15.8691	-4.27246	-0.610352	14.0381	46.3867	117.798	215.454	364.38	512.085	657.349	814.819
146.1	-32.959	-20.752	-10.376	-3.66211	-3.05176	17.7002	46.9971	117.188	209.351	358.887	506.592	665.894	817.261
146.2	-31.1279	-22.583	-9.15527	-4.88281	-7.93457	10.9863	46.9971	115.356	215.454	367.432	509.033	664.673	812.378
146.3	-33.5693	-16.4795	-11.5967	-7.93457	-1.2207	14.0381	47.6074	113.525	214.844	371.704	508.423	668.335	817.871
146.4	-32.3486	-21.3623	-11.5967	-3.05176	-4.27246	20.752	48.8281	118.408	214.844	367.432	505.981	668.945	816.04
146.5	-29.9072	-21.3623	-7.32422	-4.27246	1.83105	14.6484	49.4385	112.305	222.168	371.094	510.254	667.725	818.481
146.6	-32.3486	-21.3623	-10.376	-9.15527	-0.610352	14.6484	51.8799	115.356	219.727	368.042	505.981	667.114	813.599
146.7	-36.6211	-20.1416	-9.76562	-11.5967	-1.2207	15.2588	43.9453	115.356	219.116	369.263	512.695	673.218	821.533
146.8	-35.4004	-20.752	-6.71387	-10.376	1.2207	16.4795	50.0488	119.019	216.064	369.873	509.033	670.776	822.144
146.9	-34.1797	-17.0898	-7.93457	-10.376	-3.05176	17.0898	50.6592	120.85	220.947	380.249	515.747	671.997	825.806
147	-33.5693	-22.583	-6.10352	-5.49316	0	14.0381	45.7764	115.356	214.844	379.028	516.357	678.711	829.468
147.1	-32.959	-18.9209	-17.0898	-7.32422	1.83105	12.207	48.8281	114.136	215.454	378.418	520.02	676.88	827.637
147.2	-34.1797	-16.4795	-5.49316	-7.32422	-9.15527	17.0898	46.3867	118.408	222.168	380.859	521.851	682.983	831.909
147.3	-36.6211	-17.0898	-10.376	-5.49316	-2.44141	14.6484	50.0488	112.915	216.675	377.197	518.799	679.321	833.13
147.4	-29.2969	-15.8691	-5.49316	-3.05176	2.44141	11.5967	50.6592	119.019	217.285	382.69	522.461	676.27	825.806
147.5	-30.5176	-11.5967	-7.32422	-6.10352	-4.27246	10.9863	48.8281	115.356	222.168	383.911	515.137	680.542	828.247
147.6	-32.3486	-19.5312	-7.93457	-5.49316	0	17.0898	48.8281	114.746	222.778	382.69	512.695	681.763	826.416
147.7	-38.4521	-22.583	-4.88281	-4.88281	-3.05176	7.93457	46.3867	117.798	222.168	389.404	516.357	680.542	820.312
147.8	-29.2969	-18.3105	-6.10352	-11.5967	-0.610352	19.5312	42.1143	118.408	216.675	383.301	517.578	678.711	824.585
147.9	-31.1279	-18.9209	-10.376	-8.54492	0	13.4277	51.8799	122.681	225.22	382.08	525.513	678.101	830.688
148	-37.8418	-18.9209	-4.27246	-7.93457	-3.66211	17.0898	43.9453	123.901	228.271	390.625	531.616	671.997	834.961
148.1	-35.4004	-18.9209	-5.49316	-10.9863	-6.10352	18.3105	42.1143	119.019	228.882	393.677	524.902	680.542	838.623
148.2	-37.2314	-19.5312	-11.5967	-8.54492	2.44141	15.2588	48.2178	117.188	231.323	390.625	528.564	682.373	838.623
148.3	-38.4521	-14.6484	-2.44141	-9.76562	-1.83105	15.8691	54.9316	117.798	222.778	396.729	535.889	687.256	839.233
148.4	-35.4004	-22.583	-11.5967	-9.15527	-3.05176	10.9863	49.4385	117.798	229.492	408.325	530.396	684.204	845.337
148.5	-39.0625	-15.8691	-12.207	-6.10352	1.2207	13.4277	58.5938	117.188	223.389	399.78	534.668	695.19	841.675
148.6	-39.0625	-20.1416	-6.71387	-6.71387	5.49316	21.9727	50.0488	119.629	230.713	406.494	540.161	686.646	848.389
148.7	-41.5039	-20.752	-12.207	-8.54492	0	9.76562	49.4385	125.732	239.868	405.884	546.265	692.139	850.83
148.8	-36.6211	-17.7002	-13.4277	-4.27246	4.27246	16.4795	55.542	119.019	232.544	404.663	541.382	693.97	850.83
148.9	-32.3486	-16.4795	-5.49316	-3.05176	0.610352	10.9863	52.4902	125.122	231.323	408.325	546.875	693.97	848.999
149	-34.79	-20.752	-12.207	-15.8691	1.2207	13.4277	54.9316	128.174	236.206	410.156	555.42	698.853	848.999
149.1	-36.0107	-23.1934	-6.10352	-7.32422	-1.2207	11.5967	57.9834	130.615	228.882	408.325	553.589	698.242	855.713
149.2	-38.4521	-21.3623	-12.207	-0.610352	-0.610352	12.8174	59.2041	128.784	235.596	415.039	557.861	697.021	854.492
149.3	-33.5693	-16.4795	-6.71387	-3.66211	4.88281	13.4277	56.1523	126.343	236.206	407.104	557.861	700.684	858.154
149.4	-34.1797	-17.0898	-12.8174	-10.9863	-3.05176	19.5312	62.8662	130.005	236.206	405.273	564.575	702.515	860.596
149.5	-32.959	-20.752	-10.9863	-4.88281	4.27246	22.583	57.373	125.732	239.258	412.598	561.523	704.956	861.816
149.6	-28.0762	-18.3105	-7.32422	-4.88281	1.83105	14.0381	54.9316	128.784	244.141	411.377	556.641	708.008	854.492
149.7	-34.1797	-18.3105	-8.54492	-5.49316	0	21.3623	55.542	120.239	244.751	417.48	565.186	706.787	861.816
149.8	-34.1797	-20.1416	-7.32422	-8.54492	3.05176	17.0898	61.0352	124.512	246.582	423.584	554.199	709.229	856.934
149.9	-40.2832	-17.0898	-11.5967	-4.88281	-5.49316	15.8691	62.2559	125.732	245.361	420.532	568.237	704.956	862.427
150	-33.5693	-22.583	-11.5967	-4.88281	4.88281	15.2588	62.2559	126.953	247.803	421.753	572.51	710.449	869.141
150.1	-37.8418	-15.2588	-10.376	-8.54492	-3.05176	15.8691	55.542	123.291	244.141	421.143	574.951	712.891	880.127
150.2	-29.9072	-20.752	-7.32422	-9.76562	-0.610352	14.0381	62.8662	124.512	252.686	429.688	570.679	717.163	875.854
150.3	-33.5693	-23.1934	-7.32422	-11.5967	3.05176	18.3105	61.6455	123.901	250.854	429.688	573.73	722.046	871.582
150.4	-34.79	-17.7002	-7.32422	-4.88281	1.83105	20.1416	61.0352	128.784	255.127	427.856	576.172	716.553	870.972
150.5	-32.3486	-15.8691	-14.0381	-6.10352	-2.44141	14.6484	59.8145	131.226	254.517	432.129	576.782	717.773	872.803
150.6	-38.4521	-17.0898	-8.54492	-4.27246	-0.610352	17.7002	59.2041	123.291	252.686	432.129	579.224	721.436	874.023
150.7	-30.5176	-17.7002	-10.9863	-7.93457	4.27246	15.2588	55.542	128.174	254.517	438.232	578.003	723.267	880.127
150.8	-38.4521	-21.3623	-6.10352	-6.10352	3.66211	13.4277	63.4766	127.563	255.737	443.115	575.562	718.994	883.789
150.9	-34.1797	-19.5312	-6.71387	-10.376	1.2207	18.3105	59.8145	126.343	256.958	431.519	575.562	722.046	873.413
151	-34.1797	-18.3105	-12.207	-9.76562	0.610352	11.5967	59.8145	126.953	257.568	438.232	576.782	722.656	882.568
151.1	-32.959	-21.3623	-9.76562	-6.10352	-6.10352	13.4277	62.8662	129.395	256.348	433.35	572.51	718.994	882.568
151.2	-29.9072	-15.8691	-3.66211	-10.376	-2.44141	14.6484	57.9834	133.667	256.958	429.688	581.055	723.267	881.958
151.3	-34.1797	-20.1416	-9.76562	-5.49316	3.05176	17.7002	61.6455	125.732	255.127	433.35	578.003	724.487	881.348
151.4	-31.7383	-20.1416	-12.207	-6.10352	5.49316	18.9209	58.5938	126.343	256.348	433.96	579.224	727.539	889.282
151.5	-34.1797	-17.7002	-8.54492	-4.88281	1.2207	18.3105	63.4766	116.577	258.789	434.57	580.444	737.915	886.23
151.6	-32.959	-21.9727	-7.32422	-4.27246	2.44141	23.1934	61.0352	123.291	257.568	433.96	582.275	729.98	884.399
151.7	-31.1279	-18.9209	-18.9209	-9.76562	0.610352	21.9727	67.1387	122.07	263.672	434.57	587.158	738.525	883.179
151.8	-36.0107	-19.5312	-6.71387	-8.54492	3.05176	18.3105	68.9697	123.291	263.672	440.063	588.379	744.019	891.113
151.9	-38.4521	-15.8691	-10.376	-12.8174	-0.610352	24.4141	61.0352	124.512	258.179	446.777	593.262	735.474	895.386
152	-26.2451	-14.0381	-14.6484	-7.32422	-3.05176	17.0898	56.7627	122.681	252.686	437.622	601.196	743.408	897.827
152.1	-39.0625	-18.9209	-9.76562	-7.32422	3.05176	18.3105	63.4766	134.888	260.01	445.557	596.924	738.525	891.113
152.2	-36.0107	-15.8691	-15.2588	-7.93457	1.2207	15.8691	69.5801	136.719	255.737	441.895	607.3	744.019	900.879
152.3	-40.8936	-18.9209	-11.5967	-9.15527	2.44141	18.3105	63.4766	131.836	256.958	440.674	601.807	755.615	891.113
152.4	-37.8418	-23.8037	-8.54492	-12.207	3.66211	18.9209	58.5938	128.784	259.399	448.608	607.91	751.343	908.203
152.5	-36.6211	-19.5312	-6.71387	-10.9863	-4.88281	21.9727	65.3076	133.057	263.672	452.881	603.027	755.005	911.255
152.6	-31.7383	-18.3105	-10.9863	-9.15527	4.88281	17.7002	66.5283	138.55	264.282	448.608	604.248	758.057	911.255
152.7	-41.5039	-18.9209	-15.2588	-10.376	-1.2207	21.9727	59.8145	137.939	264.282	446.167	598.755	754.395	913.696
152.8	-38.4521	-17.0898	-9.76562	0.610352	4.27246	23.1934	69.5801	133.667	257.568	457.764	600.586	754.395	925.293
152.9	-32.959	-19.5312	-6.71387	-4.88281	6.10352	20.1416	70.8008	137.329	260.62	453.491	604.248	752.563	917.969
153	-35.4004	-20.1416	-10.9863	-3.05176	0.610352	24.4141	68.3594	141.602	266.113	452.271	603.027	750.122	920.41
153.1	-28.6865	-21.3623	-4.27246	-9.76562	3.66211	24.4141	63.4766	140.381	261.841	454.102	607.3	755.615	919.189
153.2	-34.1797	-20.1416	-7.32422	-9.76562	7.32422	23.1934	62.8662	141.602	260.62	442.505	612.793	756.226	922.852
153.3	-32.3486	-20.1416	-6.71387	-5.49316	1.2207	24.4141	62.8662	145.264	259.399	451.66	617.676	753.174	919.189
153.4	-30.5176	-14.6484	-12.8174	-8.54492	5.49316	23.1934	63.4766	137.939	268.555	451.05	615.845	761.108	916.748
153.5	-35.4004	-15.2588	-10.9863	-6.10352	4.88281	23.8037	70.8008	141.602	264.282	447.388	624.39	765.381	915.527
153.6	-36.0107	-23.1934	-9.76562	-7.93457	6.71387	25.0244	68.9697	140.381	268.555	444.946	616.455	764.16	922.852
153.7	-36.0107	-21.3623	-6.10352	-3.05176	-0.610352	20.1416	66.5283	146.484	264.893	449.829	621.338	769.043	913.086
153.8	-34.1797	-20.752	-7.32422	-7.32422	2.44141	23.8037	69.5801	136.719	267.944	449.829	615.845	773.315	926.514
153.9	-29.9072	-21.3623	-8.54492	-4.88281	4.27246	25.6348	64.6973	147.705	268.555	454.712	620.728	768.433	919.189
154	-37.8418	-23.1934	-12.207	-5.49316	2.44141	21.3623	75.0732	147.705	271.606	458.374	621.338	767.822	922.852
154.1	-31.1279	-17.0898	-10.9863	-7.32422	2.44141	20.752	72.0215	147.705	273.438	454.712	624.39	766.602	927.124
154.2	-32.959	-14.6484	-8.54492	-9.76562	6.10352	27.4658	74.4629	147.705	275.269	465.698	622.559	777.588	921.021
154.3	-32.959	-14.6484	-11.5967	0	5.49316	25.6348	71.4111	152.588	270.386	462.646	620.728	773.926	928.345
154.4	-37.8418	-20.1416	-5.49316	-9.15527	0.610352	17.7002	74.4629	144.043	273.438	468.14	623.779	781.86	932.007
154.5	-32.959	-19.5312	-13.4277	-5.49316	2.44141	24.4141	79.3457	148.926	275.269	473.022	615.845	771.484	927.734
154.6	-34.1797	-18.9209	-10.9863	-6.71387	6.10352	23.1934	72.0215	148.926	272.827	470.581	628.052	775.146	931.396
154.7	-31.1279	-21.9727	-9.15527	-7.32422	4.27246	26.2451	76.9043	154.419	281.372	469.971	626.221	770.874	930.786
154.8	-31.1279	-20.1416	-12.207	-9.76562	3.05176	23.1934	73.8525	153.198	278.32	477.905	635.376	771.484	925.293
154.9	-39.6729	-18.3105	-7.93457	-5.49316	4.27246	24.4141	73.8525	157.471	276.489	473.022	630.493	769.653	933.228
155	-34.1797	-21.9727	-16.4795	-7.32422	4.27246	21.9727	65.3076	152.588	280.762	477.905	634.155	774.536	925.903
155.1	-33.5693	-18.9209	-6.10352	-5.49316	9.76562	25.0244	70.8008	151.978	283.203	483.398	640.259	772.095	924.683
155.2	-31.7383	-14.0381	-12.8174	-8.54492	7.32422	20.1416	73.2422	143.433	278.931	479.126	637.817	774.536	932.617
155.3	-35.4004	-19.5312	-7.32422	-8.54492	3.66211	25.6348	70.8008	153.809	291.138	481.567	632.324	775.146	935.669
155.4	-32.959	-17.7002	-5.49316	-7.93457	3.66211	26.8555	74.4629	147.095	275.879	488.281	637.817	771.484	933.228
155.5	-30.5176	-22.583	-15.2588	-6.71387	-0.610352	25.0244	72.6318	154.419	282.593	480.957	645.142	772.705	933.228
155.6	-31.7383	-19.5312	-8.54492	-6.10352	3.05176	29.2969	71.4111	151.367	284.424	487.061	643.311	778.198	936.89
155.7	-31.7383	-21.9727	-3.05176	-3.05176	-3.05176	21.3623	73.8525	150.757	289.307	486.45	644.531	782.471	932.007
155.8	-38.4521	-19.5312	-7.93457	-5.49316	4.88281	25.0244	72.0215	148.926	282.593	486.45	643.311	782.471	935.059
155.9	-32.3486	-22.583	-6.71387	-6.10352	14.6484	26.8555	75.6836	147.095	281.982	499.268	648.193	783.081	939.331
156	-31.7383	-20.1416	-7.93457	-7.93457	4.88281	28.0762	72.6318	145.874	275.879	491.943	645.142	787.964	945.435
156.1	-32.3486	-21.3623	-14.0381	-6.10352	6.10352	26.8555	71.4111	145.264	287.476	493.774	647.583	787.964	947.266
156.2	-32.959	-19.5312	-7.93457	-10.376	7.32422	23.1934	75.6836	149.536	288.086	493.164	648.804	786.133	944.824
156.3	-36.6211	-21.9727	-8.54492	-0.610352	0	20.1416	73.2422	149.536	283.813	493.164	654.297	795.288	944.214
156.4	-39.0625	-14.6484	-8.54492	-4.88281	4.88281	22.583	72.6318	148.926	289.307	492.554	653.076	788.574	948.486
156.5	-34.79	-20.1416	-7.32422	-7.93457	4.27246	28.0762	75.0732	145.264	297.241	500.488	651.855	791.626	963.135
156.6	-34.79	-22.583	-8.54492	-12.8174	6.10352	19.5312	75.6836	140.381	290.527	504.761	656.128	794.067	964.355
156.7	-38.4521	-20.752	-12.207	-4.88281	6.10352	25.0244	72.0215	150.757	290.527	496.826	656.738	795.288	961.914
156.8	-37.8418	-18.9209	-12.207	-5.49316	-5.49316	24.4141	74.4629	151.367	291.748	503.54	663.452	791.626	966.797
156.9	-38.4521	-21.3623	-11.5967	-10.376	2.44141	21.3623	79.3457	159.912	293.579	506.592	659.18	797.729	964.355
157	-38.4521	-21.3623	-14.0381	-8.54492	3.05176	20.752	67.1387	159.302	288.696	505.371	660.4	803.833	964.355
157.1	-32.959	-21.3623	-11.5967	-5.49316	0.610352	24.4141	72.6318	156.25	294.8	505.371	657.959	800.171	968.018
157.2	-30.5176	-20.1416	-14.0381	-6.10352	5.49316	23.8037	68.3594	151.978	302.734	506.592	661.621	799.561	969.849
157.3	-40.2832	-18.9209	-15.8691	-8.54492	2.44141	21.9727	68.9697	153.809	290.527	507.202	659.79	800.171	967.407
157.4	-39.0625	-18.9209	-14.0381	-10.9863	-0.610352	25.0244	75.0732	150.146	296.021	507.812	653.076	800.171	969.849
157.5	-35.4004	-18.3105	-9.76562	-8.54492	3.66211	26.2451	72.6318	151.978	295.41	509.644	661.621	811.768	969.238
157.6	-31.7383	-17.0898	-9.15527	-3.05176	10.376	21.3623	67.749	153.198	297.241	509.033	664.062	811.768	975.342
157.7	-34.1797	-15.8691	-14.0381	-3.66211	1.2207	23.8037	67.1387	158.691	301.514	505.981	667.725	808.105	969.849
157.8	-34.79	-17.0898	-12.8174	-9.76562	10.9863	20.752	75.6836	160.522	300.293	510.254	664.062	814.819	970.459
157.9	-38.4521	-21.3623	-9.15527	-7.93457	9.15527	25.6348	75.0732	160.522	297.852	510.864	661.621	819.092	972.29
158	-30.5176	-23.8037	-7.32422	-5.49316	5.49316	23.1934	72.6318	156.25	299.683	506.592	670.166	820.923	969.238
158.1	-36.6211	-17.0898	-7.93457	-6.71387	6.10352	26.2451	76.9043	162.354	293.579	507.812	671.387	828.857	971.069
158.2	-31.1279	-18.9209	-9.15527	-8.54492	5.49316	18.3105	76.2939	156.86	297.241	505.371	657.959	823.364	975.952
158.3	-37.8418	-18.3105	-15.2588	-3.66211	3.66211	28.0762	75.6836	163.574	300.293	505.981	665.894	823.364	974.731
158.4	-37.2314	-15.8691	-11.5967	-3.05176	-4.27246	20.1416	71.4111	157.471	302.734	507.202	657.959	823.975	974.731
158.5	-41.5039	-15.8691	-4.27246	-3.05176	4.88281	25.6348	75.6836	158.691	297.852	512.085	661.621	826.416	972.9
158.6	-31.1279	-18.3105	-10.9863	-6.71387	9.76562	26.2451	78.125	161.133	299.072	509.644	661.621	830.688	979.004
158.7	-29.9072	-23.1934	-10.376	-1.83105	0.610352	27.4658	76.2939	161.133	309.448	512.695	661.011	828.247	974.121
158.8	-33.5693	-20.1416	-17.0898	-4.88281	7.93457	25.0244	76.9043	162.354	303.955	512.695	666.504	825.806	972.9
158.9	-34.79	-20.1416	-15.8691	-6.10352	5.49316	23.8037	76.2939	162.964	306.396	513.306	672.607	823.975	979.004
159	-32.3486	-17.0898	-12.8174	-1.2207	2.44141	26.8555	75.6836	162.354	305.176	521.24	670.776	831.299	982.666
159.1	-30.5176	-19.5312	-10.376	-9.15527	3.05176	19.5312	75.6836	163.574	303.955	512.085	675.049	829.468	984.497
159.2	-37.2314	-20.1416	-9.76562	-3.05176	-0.610352	27.4658	77.5146	163.574	303.345	514.526	677.49	833.13	982.056
159.3	-29.2969	-20.1416	-9.15527	-3.66211	4.88281	23.8037	78.7354	161.743	300.903	507.812	673.218	827.637	985.718
159.4	-29.2969	-23.8037	-14.6484	-8.54492	3.66211	23.8037	81.1768	164.185	311.279	514.526	675.049	830.078	985.107
159.5	-34.1797	-18.9209	-10.9863	-5.49316	3.05176	25.6348	78.125	168.457	311.89	505.981	676.88	820.923	980.225
159.6	-32.3486	-24.4141	-7.93457	-9.15527	0.610352	27.4658	74.4629	163.574	314.941	514.526	676.27	830.078	980.835
159.7	-35.4004	-24.4141	-9.76562	-4.88281	6.10352	19.5312	81.1768	170.898	320.435	506.592	680.542	834.961	981.445
159.8	-39.0625	-18.9209	-13.4277	-3.66211	-0.610352	25.6348	73.8525	168.457	319.214	510.864	687.866	828.857	987.549
159.9	-32.959	-20.752	-9.76562	-3.66211	2.44141	25.6348	70.8008	165.405	326.538	518.188	678.711	828.247	986.938
160	-34.79	-15.8691	-10.376	-1.83105	6.10352	25.6348	74.4629	171.509	317.993	516.968	678.101	833.74	984.497
160.1	-31.1279	-17.7002	-12.8174	-6.71387	8.54492	26.2451	79.3457	168.457	317.383	515.747	682.373	830.078	987.549
160.2	-30.5176	-21.9727	-4.27246	-5.49316	4.88281	24.4141	73.2422	165.405	322.266	522.461	681.152	831.909	986.938
160.3	-25.6348	-17.0898	-9.15527	-4.88281	2.44141	32.959	76.9043	170.898	327.148	519.409	683.594	839.844	990.601
160.4	-37.2314	-15.8691	-11.5967	-6.10352	1.83105	20.1416	80.5664	172.119	322.876	529.175	684.814	833.74	996.094
160.5	-30.5176	-20.1416	-12.207	-7.32422	0.610352	29.9072	76.2939	168.457	327.148	525.513	685.425	834.351	993.042
160.6	-30.5176	-20.752	-10.9863	-7.93457	4.27246	23.8037	78.125	165.405	324.707	529.175	695.801	839.844	1001.59
160.7	-31.1279	-20.1416	-9.15527	-9.15527	6.71387	23.8037	76.2939	172.119	321.045	529.175	693.97	841.064	996.704
160.8	-30.5176	-21.9727	-10.376	-3.05176	0.610352	25.6348	80.5664	167.236	322.876	529.785	684.814	845.947	1000.37
160.9	-37.8418	-15.8691	-12.207	-3.66211	6.10352	29.9072	83.0078	175.781	324.707	529.175	685.425	845.337	1004.03
161	-36.6211	-25.6348	-12.8174	-3.05176	1.83105	20.752	86.6699	178.223	322.266	531.006	683.594	839.233	1000.98
161.1	-28.6865	-18.9209	-7.32422	-7.32422	-0.610352	27.4658	86.0596	173.95	319.824	527.344	684.204	842.896	1004.03
161.2	-37.8418	-20.752	-4.88281	-1.83105	-1.83105	23.1934	83.6182	177.612	318.604	524.902	694.58	844.727	1010.74
161.3	-34.1797	-20.1416	-5.49316	-5.49316	4.27246	27.4658	79.3457	176.392	322.876	524.292	684.204	843.506	1013.18
161.4	-29.2969	-20.752	-6.10352	-4.27246	4.27246	25.6348	83.0078	170.898	329.59	532.227	686.646	847.168	1012.57
161.5	-36.6211	-15.8691	-14.0381	-3.05176	3.66211	35.4004	84.2285	174.561	325.928	532.837	686.035	847.778	1013.18
161.6	-34.1797	-20.1416	-6.71387	-3.66211	3.05176	30.5176	81.7871	172.119	325.928	529.785	684.814	848.389	1016.24
161.7	-32.3486	-16.4795	-13.4277	-12.207	-1.2207	31.1279	76.2939	176.392	325.928	532.227	696.411	852.051	1011.35
161.8	-28.0762	-23.8037	-10.376	-1.2207	2.44141	26.8555	88.501	176.392	328.979	529.785	698.242	848.389	1016.24
161.9	-32.959	-18.9209	-10.376	-1.2207	3.05176	21.9727	79.9561	175.171	326.538	535.278	698.853	849.609	1015.01
162	-33.5693	-18.9209	-9.15527	-5.49316	6.10352	26.2451	79.3457	181.885	326.538	536.499	699.463	855.103	1017.46
162.1	-31.7383	-24.4141	-9.15527	0	1.83105	18.3105	78.7354	181.885	328.369	537.109	704.346	852.051	1013.18
162.2	-36.0107	-20.1416	-9.76562	-0.610352	1.83105	26.2451	75.6836	180.054	329.59	540.161	694.58	855.713	1015.62
162.3	-36.0107	-26.8555	-8.54492	-6.71387	1.83105	27.4658	81.7871	179.443	328.369	537.72	700.684	853.882	1016.85
162.4	-29.2969	-21.9727	-10.9863	-3.05176	4.27246	31.1279	78.7354	178.833	328.979	540.771	698.242	855.713	1025.39
162.5	-37.2314	-18.9209	-14.0381	-4.88281	3.05176	24.4141	83.6182	177.002	334.473	533.447	695.801	856.934	1016.24
162.6	-35.4004	-17.7002	-9.76562	-6.10352	1.2207	25.0244	75.0732	185.547	334.473	545.044	703.735	855.713	1015.62
162.7	-37.8418	-20.752	-12.8174	-3.66211	1.83105	27.4658	83.6182	186.768	322.876	544.434	705.566	853.882	1019.29
162.8	-31.7383	-17.7002	-8.54492	-7.32422	3.66211	26.8555	85.4492	189.819	322.266	545.044	713.501	853.882	1021.73
162.9	-30.5176	-18.9209	-8.54492	-7.32422	3.05176	23.8037	84.2285	182.495	331.421	545.654	706.177	853.882	1014.4
163	-32.3486	-21.9727	-9.76562	-6.10352	9.15527	27.4658	84.2285	184.326	327.148	551.147	706.177	849.609	1019.9
163.1	-33.5693	-23.1934	-10.9863	-6.10352	6.71387	29.9072	78.7354	184.326	326.538	541.992	711.06	850.83	1022.34
163.2	-31.1279	-23.1934	-9.15527	-7.93457	4.88281	27.4658	83.0078	184.937	328.369	546.875	715.332	856.934	1018.68
163.3	-36.6211	-18.9209	-9.76562	-9.15527	4.27246	26.8555	83.0078	184.326	327.148	540.161	717.773	859.375	1018.68
163.4	-33.5693	-21.9727	-11.5967	-4.27246	2.44141	20.752	82.3975	186.157	333.862	548.706	717.773	863.647	1016.24
163.5	-31.7383	-24.4141	-3.66211	-7.32422	0.610352	26.8555	78.7354	189.209	336.914	541.382	717.773	853.882	1015.62
163.6	-34.1797	-23.1934	-17.0898	-3.05176	4.88281	21.3623	81.7871	187.988	337.524	552.979	723.267	859.375	1016.24
163.7	-38.4521	-21.3623	-7.93457	-2.44141	3.05176	25.6348	87.2803	184.937	341.797	545.044	723.267	858.765	1017.46
163.8	-39.0625	-18.3105	-15.2588	-1.83105	3.66211	25.0244	90.9424	186.157	345.459	544.434	723.877	854.492	1010.74
163.9	-37.8418	-13.4277	-15.8691	-7.32422	7.32422	30.5176	80.5664	184.326	341.797	538.33	726.929	856.934	1015.01
164	-33.5693	-22.583	-8.54492	-2.44141	3.66211	28.0762	82.3975	182.495	345.459	550.537	729.98	859.985	1019.29
164.1	-32.3486	-18.3105	-7.93457	-4.88281	3.66211	29.2969	82.3975	180.054	346.069	544.434	728.149	856.323	1018.07
164.2	-33.5693	-21.9727	-10.376	-3.05176	5.49316	27.4658	79.3457	187.378	345.459	545.654	731.201	856.934	1025.39
164.3	-36.6211	-18.9209	-12.8174	-4.27246	2.44141	29.2969	85.4492	189.819	344.238	550.537	734.253	862.427	1019.29
164.4	-33.5693	-17.0898	-9.76562	-6.71387	-2.44141	30.5176	85.4492	187.378	350.952	551.758	731.201	858.154	1024.17
164.5	-36.0107	-20.1416	-5.49316	-6.10352	4.27246	27.4658	81.7871	186.157	344.849	548.706	730.591	864.868	1021.73
164.6	-37.8418	-19.5312	-10.376	-7.93457	0.610352	31.1279	84.2285	184.937	347.9	554.81	736.694	875.244	1021.12
164.7	-35.4004	-24.4141	-7.93457	-7.93457	10.376	32.3486	84.2285	189.209	352.173	554.199	731.201	873.413	1018.07
164.8	-32.959	-21.9727	-9.15527	-3.05176	5.49316	29.9072	84.2285	192.261	347.29	553.589	740.967	868.53	1024.17
164.9	-32.959	-18.3105	-10.9863	-6.71387	0.610352	32.959	84.8389	186.768	347.29	559.082	744.019	874.023	1024.17
165	-34.1797	-17.0898	-13.4277	-12.207	6.10352	32.959	83.0078	190.43	349.121	558.472	738.525	874.634	1028.44
165.1	-40.8936	-25.0244	-7.93457	1.2207	7.32422	35.4004	84.2285	185.547	347.9	552.368	739.746	876.465	1034.55
165.2	-32.959	-21.3623	-10.376	-7.32422	5.49316	37.8418	89.1113	185.547	341.797	548.096	742.188	874.634	1032.71
165.3	-38.4521	-24.4141	-3.66211	-4.27246	1.83105	32.3486	87.8906	189.209	348.511	555.42	745.239	880.737	1035.77
165.4	-38.4521	-22.583	-9.15527	-6.71387	3.05176	37.2314	84.2285	187.988	355.225	557.861	742.188	878.906	1036.99
165.5	-26.2451	-22.583	-10.376	-4.27246	6.71387	32.3486	85.4492	186.768	358.276	562.134	748.901	883.789	1040.04
165.6	-32.3486	-17.7002	-12.207	-9.15527	7.93457	37.8418	81.7871	188.599	354.614	559.692	738.525	883.789	1043.09
165.7	-33.5693	-16.4795	-6.71387	-4.88281	4.27246	35.4004	91.5527	197.144	357.666	556.03	754.395	887.451	1052.25
165.8	-38.4521	-26.8555	-12.8174	-13.4277	5.49316	32.3486	87.2803	185.547	353.394	552.368	758.057	881.348	1049.8
165.9	-31.7383	-18.9209	-12.207	-6.10352	6.10352	27.4658	83.6182	184.937	359.497	558.472	758.057	879.517	1047.97
166	-38.4521	-23.8037	-10.9863	-4.27246	1.83105	30.5176	86.6699	196.533	358.887	559.082	756.836	886.23	1047.97
166.1	-38.4521	-24.4141	-9.15527	-12.8174	9.15527	34.1797	89.1113	194.092	368.042	558.472	752.563	888.062	1046.14
166.2	-34.79	-21.9727	-14.0381	-10.376	8.54492	31.1279	88.501	193.481	364.99	557.251	765.381	885.01	1052.25
166.3	-36.6211	-17.0898	-9.76562	-11.5967	6.10352	32.959	91.5527	199.585	361.328	564.575	760.498	889.893	1043.09
166.4	-32.3486	-23.8037	-5.49316	-10.376	9.76562	32.3486	92.7734	200.195	363.77	571.899	763.55	889.893	1049.8
166.5	-33.5693	-23.8037	-11.5967	-3.05176	4.88281	23.8037	95.2148	200.195	362.549	568.237	760.498	894.165	1050.42
166.6	-33.5693	-18.3105	-6.71387	-9.76562	3.66211	29.2969	92.1631	200.195	362.549	559.082	768.433	897.217	1051.03
166.7	-32.959	-17.0898	-14.6484	-4.27246	-0.610352	36.6211	92.7734	203.247	364.38	563.354	764.16	896.606	1045.53
166.8	-36.6211	-19.5312	-9.15527	-7.32422	6.10352	34.1797	88.501	201.416	361.328	567.627	759.277	906.372	1046.14
166.9	-33.5693	-21.9727	-7.32422	-7.32422	6.10352	31.7383	90.332	206.299	369.263	565.796	762.329	903.32	1048.58
167	-27.4658	-22.583	-12.8174	-5.49316	4.88281	38.4521	97.0459	202.637	372.925	570.679	764.771	906.372	1057.13
167.1	-31.7383	-16.4795	-10.9863	-7.32422	0	34.1797	90.9424	204.468	371.094	577.393	756.836	903.32	1055.91
167.2	-36.0107	-18.9209	-5.49316	-5.49316	9.15527	32.3486	90.9424	209.351	374.146	578.003	759.888	908.203	1059.57
167.3	-39.6729	-22.583	-12.207	-10.9863	3.05176	31.1279	92.1631	201.416	371.094	574.341	756.836	911.255	1065.06
167.4	-37.2314	-21.3623	-11.5967	-9.15527	6.10352	36.0107	93.9941	208.13	377.197	578.003	750.122	911.865	1066.28
167.5	-41.5039	-22.583	-8.54492	-9.76562	3.05176	36.6211	98.2666	202.026	376.587	568.237	755.005	906.982	1068.73
167.6	-29.2969	-20.1416	-14.6484	-10.9863	9.15527	33.5693	97.6562	201.416	369.873	577.393	754.395	913.696	1069.34
167.7	-36.0107	-21.9727	-12.207	-4.27246	6.71387	33.5693	96.4355	210.571	371.704	576.172	758.057	911.255	1072.39
167.8	-33.5693	-22.583	-10.376	-4.88281	3.66211	36.6211	97.0459	207.52	377.808	587.158	761.719	910.645	1068.73
167.9	-37.8418	-22.583	-9.76562	-4.88281	5.49316	35.4004	96.4355	205.078	372.314	579.224	764.771	917.358	1074.83
168	-31.1279	-22.583	-9.15527	-4.27246	4.88281	31.7383	99.4873	208.13	382.08	584.717	763.55	916.748	1079.71
168.1	-34.1797	-14.0381	-14.0381	-8.54492	6.10352	38.4521	100.098	203.857	383.911	581.665	759.277	906.982	1074.22
168.2	-33.5693	-20.752	-10.9863	-6.10352	7.32422	39.0625	97.6562	203.247	378.418	583.496	759.888	908.813	1063.23
168.3	-26.8555	-18.3105	-3.66211	-10.9863	4.27246	36.6211	92.1631	203.857	376.587	583.496	765.991	905.151	1078.49
168.4	-32.959	-21.9727	-6.71387	-10.376	6.10352	32.959	97.0459	208.74	379.639	587.769	763.55	911.255	1082.15
168.5	-32.959	-21.9727	-10.9863	-4.88281	10.376	31.1279	102.539	210.571	379.639	587.769	770.264	910.645	1087.65
168.6	-33.5693	-18.9209	-10.9863	-9.76562	4.88281	34.1797	98.877	210.571	375.977	585.938	775.146	915.527	1089.48
168.7	-31.1279	-18.3105	-10.9863	-8.54492	9.15527	33.5693	101.929	217.285	383.301	588.379	781.25	911.865	1094.36
168.8	-30.5176	-21.3623	-12.207	-6.71387	9.15527	32.3486	98.877	216.064	379.639	580.444	783.691	913.696	1095.58
168.9	-39.6729	-17.7002	-11.5967	-6.10352	4.88281	37.8418	103.149	211.182	386.353	589.6	791.626	916.138	1094.36
169	-33.5693	-21.9727	-14.0381	-8.54492	4.27246	36.0107	96.4355	213.013	385.132	595.093	787.964	924.683	1097.41
169.1	-38.4521	-14.6484	-9.76562	-11.5967	8.54492	37.2314	100.098	217.285	388.184	590.82	793.457	921.021	1094.97
169.2	-32.959	-17.7002	-7.93457	-9.15527	3.66211	36.6211	96.4355	218.506	383.301	593.872	791.016	923.462	1094.36
169.3	-36.6211	-20.1416	-5.49316	-8.54492	9.76562	33.5693	100.708	217.285	386.963	592.651	792.847	927.734	1098.63
169.4	-32.3486	-23.1934	-9.76562	-1.2207	5.49316	33.5693	90.9424	219.116	388.794	591.431	792.236	935.059	1104.74
169.5	-34.1797	-20.752	-7.93457	-6.10352	3.05176	35.4004	96.4355	220.947	388.794	597.534	789.185	930.786	1101.68
169.6	-42.1143	-18.3105	-8.54492	-7.32422	4.88281	34.1797	99.4873	218.506	392.456	601.807	785.522	933.228	1101.68
169.7	-39.0625	-18.9209	-7.93457	-7.32422	3.05176	39.0625	103.149	225.83	393.066	602.417	780.64	932.617	1098.02
169.8	-34.1797	-18.9209	-9.15527	-10.376	6.10352	34.1797	91.5527	217.285	394.897	599.365	781.86	933.228	1099.24
169.9	-35.4004	-19.5312	-10.9863	-3.05176	10.376	36.0107	100.098	223.389	392.456	603.027	787.964	933.838	1102.29
170	-35.4004	-21.9727	-5.49316	-8.54492	7.93457	32.959	102.539	220.947	393.677	596.313	785.522	935.669	1103.52
170.1	-40.2832	-7.93457	-16.4795	-6.10352	6.10352	32.3486	103.149	227.051	388.794	604.248	783.081	933.838	1113.28
170.2	-37.8418	-15.8691	-7.32422	-6.10352	9.15527	38.4521	104.98	223.999	399.17	604.248	780.029	929.565	1120.61
170.3	-27.4658	-18.3105	-6.10352	-6.10352	9.76562	38.4521	103.149	222.168	394.287	599.365	780.64	933.838	1120.61
170.4	-37.2314	-23.1934	-13.4277	-3.05176	11.5967	31.7383	103.76	225.22	397.949	608.521	783.081	931.396	1113.28
170.5	-36.6211	-17.7002	-12.207	-0.610352	3.05176	38.4521	107.422	222.778	399.17	609.131	780.64	937.5	1124.27
170.6	-32.959	-22.583	-12.207	-7.93457	8.54492	37.2314	106.201	227.051	400.391	609.131	784.302	932.007	1130.37
170.7	-31.1279	-18.9209	-8.54492	-1.2207	3.66211	27.4658	102.539	223.999	392.456	610.962	781.86	934.448	1123.66
170.8	-40.8936	-13.4277	-7.93457	-4.88281	11.5967	32.959	109.253	230.713	393.066	616.455	782.471	947.266	1126.1
170.9	-32.959	-20.1416	-10.376	-9.15527	2.44141	32.3486	105.591	223.999	390.625	612.183	791.626	942.383	1129.76
171	-34.79	-21.9727	-9.15527	-4.88281	9.76562	32.3486	103.149	223.389	399.78	618.286	788.574	950.928	1130.37
171.1	-36.0107	-10.9863	-8.54492	-1.2207	10.9863	37.8418	103.76	230.103	395.508	614.624	786.743	949.707	1130.98
171.2	-36.0107	-22.583	-9.76562	-0.610352	7.93457	39.6729	106.201	229.492	399.17	617.676	790.405	949.097	1132.2
171.3	-37.8418	-20.1416	-4.88281	-7.93457	6.71387	31.7383	103.76	223.999	399.78	618.286	788.574	955.2	1134.03
171.4	-33.5693	-23.8037	-7.32422	-4.88281	5.49316	37.2314	104.37	231.934	402.832	622.559	793.457	957.031	1134.03
171.5	-32.3486	-15.2588	-12.8174	-2.44141	2.44141	36.0107	107.422	234.985	401.001	624.39	792.236	959.473	1140.75
171.6	-36.0107	-18.3105	-12.207	-5.49316	6.71387	37.2314	109.863	227.661	401.611	624.39	792.236	954.59	1143.8
171.7	-39.6729	-13.4277	-9.76562	-9.76562	6.71387	31.1279	111.694	233.765	401.611	621.948	791.016	958.252	1146.85
171.8	-36.0107	-17.7002	-3.66211	-8.54492	10.9863	36.0107	109.863	238.037	408.325	625.61	792.847	942.383	1141.97
171.9	-37.8418	-17.0898	-7.32422	-4.27246	12.207	28.6865	105.591	236.816	405.273	625	793.457	952.759	1135.25
172	-36.0107	-17.0898	-9.76562	-9.15527	4.88281	32.3486	111.084	236.816	402.832	623.779	800.781	953.979	1133.42
172.1	-33.5693	-16.4795	-7.93457	-4.27246	6.10352	36.0107	110.474	236.816	407.104	628.662	792.847	951.538	1138.92
172.2	-32.959	-21.3623	-11.5967	-4.88281	10.376	37.2314	108.032	236.816	405.273	617.676	798.34	958.862	1146.24
172.3	-36.0107	-21.3623	-9.15527	-7.32422	11.5967	41.5039	109.863	240.479	397.949	629.272	797.119	959.473	1140.14
172.4	-42.1143	-20.1416	-9.76562	-6.10352	9.15527	38.4521	106.201	239.258	407.715	618.896	795.288	955.2	1141.97
172.5	-37.2314	-17.7002	-12.207	-10.9863	6.71387	34.1797	111.084	240.479	406.494	625	799.561	960.693	1137.08
172.6	-34.79	-10.9863	-11.5967	-3.05176	3.05176	34.1797	112.305	236.206	405.273	630.493	803.833	966.797	1143.19
172.7	-37.2314	-14.6484	-5.49316	-9.15527	8.54492	42.1143	117.188	239.868	403.442	623.169	805.664	955.811	1149.29
172.8	-38.4521	-18.3105	-11.5967	-4.27246	12.207	32.3486	108.643	235.596	402.832	627.441	807.495	960.083	1147.46
172.9	-33.5693	-22.583	-12.207	-6.71387	8.54492	37.2314	104.98	235.596	411.987	635.376	811.768	966.187	1148.07
173	-32.959	-14.0381	-10.376	-3.05176	9.76562	37.8418	110.474	244.141	413.818	633.545	810.547	970.459	1154.79
173.1	-37.8418	-23.8037	-14.0381	0	9.15527	34.1797	109.863	234.375	411.987	629.272	817.261	967.407	1152.34
173.2	-32.959	-15.2588	-14.0381	-4.88281	4.88281	31.1279	108.032	240.479	407.104	631.714	810.547	970.459	1150.51
173.3	-32.959	-18.3105	-8.54492	-5.49316	3.66211	34.79	109.253	238.647	413.208	626.221	811.157	973.511	1152.34
173.4	-38.4521	-18.9209	-12.8174	-2.44141	12.8174	36.0107	111.694	239.868	413.208	629.272	803.833	978.394	1148.68
173.5	-36.0107	-20.1416	-14.6484	-4.88281	10.376	36.0107	115.356	241.699	410.156	631.104	808.105	977.173	1150.51
173.6	-30.5176	-18.3105	-12.207	-7.93457	9.15527	38.4521	107.422	238.647	408.936	632.935	812.378	977.173	1150.51
173.7	-33.5693	-18.3105	-11.5967	-12.207	14.0381	34.79	111.694	236.206	410.156	633.545	811.157	980.225	1155.4
173.8	-36.6211	-24.4141	-10.9863	-6.71387	6.10352	36.6211	119.019	239.258	412.598	626.221	814.819	982.056	1152.34
173.9	-26.2451	-17.7002	-15.8691	-3.66211	3.66211	32.959	104.98	239.868	414.429	629.272	809.326	983.276	1162.11
174	-31.1279	-12.207	-9.76562	-1.2207	9.15527	34.79	106.812	243.53	416.26	625	820.312	975.952	1161.5
174.1	-36.6211	-17.0898	-12.207	-7.32422	9.76562	37.8418	108.643	240.479	418.701	641.479	824.585	979.614	1160.89
174.2	-36.0107	-17.7002	-10.9863	-4.88281	9.76562	36.6211	116.577	237.427	420.532	639.038	828.857	983.887	1162.11
174.3	-31.7383	-25.0244	-8.54492	-3.05176	8.54492	36.0107	106.812	238.037	422.363	641.479	826.416	980.225	1167.6
174.4	-32.3486	-21.9727	-21.9727	-9.15527	7.32422	40.8936	112.305	241.699	424.805	632.935	830.078	983.887	1165.16
174.5	-32.959	-25.0244	-12.8174	-7.93457	8.54492	37.8418	112.305	235.596	419.922	638.428	822.144	985.718	1172.49
174.6	-32.3486	-18.3105	-5.49316	-3.66211	8.54492	36.0107	110.474	238.647	425.415	643.921	833.74	985.718	1167.6
174.7	-33.5693	-17.0898	-10.9863	-6.71387	6.71387	37.2314	114.136	239.868	433.35	651.245	831.909	979.004	1174.93
174.8	-34.1797	-20.1416	-10.376	-10.9863	10.376	42.1143	111.694	239.258	424.194	652.466	836.182	986.328	1170.65
174.9	-34.79	-21.9727	-13.4277	-7.32422	9.15527	38.4521	118.408	240.479	427.246	655.518	835.571	986.938	1171.26
175	-31.7383	-19.5312	-12.8174	-1.2207	13.4277	37.8418	119.019	239.868	426.636	650.635	823.364	988.159	1181.03
175.1	-26.8555	-18.3105	-9.76562	-6.10352	13.4277	39.6729	119.019	242.31	433.35	655.518	824.585	987.549	1184.08
175.2	-32.3486	-22.583	-11.5967	-3.05176	4.88281	36.6211	119.629	241.089	435.181	656.738	831.299	985.718	1184.08
175.3	-34.1797	-18.3105	-10.9863	-7.32422	9.15527	40.8936	120.85	236.816	432.739	655.518	828.857	988.77	1187.13
175.4	-35.4004	-18.3105	-20.1416	-2.44141	4.88281	39.0625	119.629	237.427	433.96	656.128	838.013	996.704	1188.35
175.5	-35.4004	-21.3623	-11.5967	-3.05176	6.71387	40.2832	118.408	241.699	432.739	657.959	835.571	1000.98	1190.8
175.6	-34.79	-25.0244	-12.8174	-6.10352	7.93457	38.4521	120.85	244.141	438.232	654.907	835.571	998.535	1188.96
175.7	-31.1279	-23.1934	-9.76562	-10.376	7.32422	37.8418	119.019	241.699	430.908	654.907	833.13	1006.47	1192.02
175.8	-34.1797	-18.9209	-10.9863	-3.66211	13.4277	42.1143	121.46	243.53	429.077	654.907	836.792	1002.81	1192.63
175.9	-29.9072	-21.3623	-7.93457	-7.93457	8.54492	40.2832	119.019	245.972	428.467	656.128	832.52	1004.64	1192.63
176	-38.4521	-24.4141	-10.376	-4.88281	8.54492	42.1143	117.798	246.582	429.688	654.297	833.13	1008.91	1190.8
176.1	-31.1279	-17.0898	-7.32422	-6.10352	1.83105	42.7246	126.953	247.803	436.401	662.231	832.52	1011.96	1187.74
176.2	-39.0625	-20.752	-12.207	0	8.54492	39.6729	121.46	244.751	435.791	660.4	839.844	998.535	1191.41
176.3	-32.959	-25.6348	-13.4277	-4.88281	11.5967	40.8936	125.122	245.361	442.505	668.335	838.623	1008.3	1185.3
176.4	-33.5693	-20.752	-13.4277	0	3.05176	39.0625	124.512	248.413	443.726	668.335	839.233	1005.25	1193.24
176.5	-34.79	-20.752	-15.8691	-4.27246	9.76562	43.9453	122.681	241.699	434.57	677.49	841.064	1004.64	1195.68
176.6	-36.0107	-21.3623	-9.76562	-7.32422	9.15527	37.8418	125.122	247.803	441.284	670.166	843.506	1008.3	1193.24
176.7	-36.6211	-22.583	-5.49316	-9.15527	10.376	31.7383	120.239	254.517	438.843	670.776	840.454	1009.52	1192.63
176.8	-37.8418	-17.7002	-10.376	-7.32422	9.15527	37.2314	119.629	249.634	444.336	673.828	842.285	1003.42	1196.29
176.9	-36.6211	-21.3623	-11.5967	-6.71387	5.49316	39.6729	122.07	242.31	446.777	678.711	844.727	1006.47	1196.9
177	-35.4004	-20.752	-9.15527	-5.49316	6.10352	43.335	120.239	255.737	442.505	667.725	847.168	1010.13	1191.41
177.1	-31.1279	-21.3623	-10.376	-5.49316	10.376	39.0625	124.512	256.348	452.881	676.27	835.571	1005.25	1201.17
177.2	-29.9072	-26.2451	-7.93457	-1.2207	8.54492	42.7246	121.46	252.075	448.608	671.997	837.402	1008.3	1190.8
177.3	-35.4004	-24.4141	-14.6484	-5.49316	7.32422	39.6729	130.005	256.348	450.439	673.218	842.896	1005.25	1187.13
177.4	-39.0625	-17.7002	-11.5967	-4.88281	10.376	44.5557	131.226	256.958	447.998	672.607	841.064	1008.3	1200.56
177.5	-33.5693	-19.5312	-10.376	-3.05176	6.10352	41.5039	128.784	263.672	451.66	679.932	848.999	1010.74	1199.34
177.6	-31.1279	-23.8037	-17.0898	-2.44141	6.10352	36.0107	130.005	261.23	453.491	683.594	853.882	1013.18	1201.17
177.7	-30.5176	-21.3623	-15.8691	-8.54492	12.207	43.9453	122.07	263.062	453.491	686.646	855.103	1014.4	1190.19
177.8	-28.6865	-18.9209	-7.32422	-3.05176	12.207	40.8936	130.615	266.113	448.608	685.425	859.985	1014.4	1193.24
177.9	-31.1279	-21.9727	-7.93457	-6.10352	8.54492	39.0625	123.901	262.451	447.998	676.88	859.375	1010.74	1193.24
178	-31.7383	-21.3623	-6.10352	-4.88281	11.5967	36.6211	129.395	261.841	451.66	676.27	855.103	1019.29	1200.56
178.1	-30.5176	-20.752	-17.0898	-2.44141	8.54492	40.2832	126.953	260.62	454.102	682.373	866.699	1019.29	1196.29
178.2	-38.4521	-21.3623	-10.376	-4.27246	4.27246	39.6729	130.615	263.672	457.764	685.425	862.427	1021.73	1198.73
178.3	-33.5693	-23.1934	-4.27246	-1.2207	8.54492	36.6211	129.395	259.399	460.205	682.373	862.427	1025.39	1194.46
178.4	-32.959	-25.0244	-7.32422	-3.66211	10.9863	42.1143	128.174	263.062	457.153	686.646	861.206	1019.29	1206.05
178.5	-37.8418	-16.4795	-12.207	-3.05176	12.207	37.2314	132.446	270.386	461.426	682.373	863.037	1024.78	1203.61
178.6	-37.8418	-21.3623	-14.6484	-3.66211	4.88281	42.1143	130.615	270.386	460.815	679.932	864.258	1024.78	1207.28
178.7	-40.2832	-21.9727	-14.6484	-6.10352	5.49316	40.8936	131.836	265.503	455.322	686.646	866.089	1026	1207.28
178.8	-32.3486	-18.9209	-9.76562	-2.44141	9.15527	37.8418	134.277	263.672	465.088	688.477	864.868	1018.07	1207.89
178.9	-32.959	-14.0381	-6.10352	-7.93457	10.9863	41.5039	136.108	269.165	466.919	682.373	870.972	1026	1206.05
179	-36.6211	-22.583	-14.6484	-2.44141	2.44141	42.7246	131.836	269.775	466.309	677.49	862.427	1025.39	1201.78
179.1	-37.2314	-21.3623	-10.376	-3.05176	9.76562	40.2832	126.953	270.996	473.022	686.646	874.023	1022.95	1205.44
179.2	-35.4004	-16.4795	-13.4277	-5.49316	9.76562	39.6729	130.615	267.334	473.633	680.542	866.699	1027.83	1207.89
179.3	-32.3486	-26.8555	-10.376	-12.207	1.83105	40.2832	136.108	274.658	476.074	686.646	867.92	1030.27	1204.83
179.4	-36.0107	-17.7002	-9.15527	-12.8174	10.376	40.2832	125.122	275.269	468.14	688.477	866.089	1030.27	1208.5
179.5	-39.0625	-15.8691	-8.54492	-5.49316	6.10352	40.8936	126.953	264.893	474.854	687.866	874.023	1033.33	1207.28
179.6	-39.0625	-18.3105	-10.9863	-1.83105	4.88281	40.8936	130.005	274.658	474.854	683.594	866.089	1035.16	1217.04
179.7	-34.79	-22.583	-17.0898	-6.71387	5.49316	43.335	133.057	270.386	468.14	696.411	860.596	1038.21	1212.16
179.8	-36.0107	-19.5312	-10.9863	-4.88281	6.71387	43.9453	128.174	267.944	476.074	690.918	864.868	1037.6	1214.6
179.9	-36.0107	-18.3105	-7.93457	-6.10352	9.76562	48.2178	128.784	274.658	474.854	690.308	864.258	1032.71	1212.16
180	-31.1279	-20.752	-11.5967	-6.71387	12.207	42.7246	131.226	270.996	473.633	695.19	862.427	1029.66	1218.87
180.1	-35.4004	-18.3105	-17.0898	-3.66211	10.376	40.2832	136.719	271.606	479.736	692.139	865.479	1033.94	1218.26
180.2	-32.959	-17.0898	-9.15527	-6.10352	7.32422	43.335	126.953	267.944	480.347	695.801	866.089	1035.16	1220.7
180.3	-34.1797	-25.6348	-10.376	-4.27246	1.83105	45.7764	134.888	270.386	483.398	701.294	867.92	1034.55	1217.04
180.4	-32.3486	-21.9727	-7.93457	-6.71387	1.2207	42.1143	140.991	267.944	477.295	698.242	871.582	1037.6	1224.37
180.5	-34.79	-25.0244	-9.76562	-2.44141	14.0381	39.0625	134.888	277.1	480.957	700.684	870.361	1032.1	1230.47
180.6	-34.79	-20.752	-11.5967	-5.49316	8.54492	48.2178	138.55	272.217	476.685	704.346	867.31	1039.43	1226.2
180.7	-32.959	-25.0244	-12.207	-9.15527	9.15527	48.8281	134.888	275.879	482.178	704.346	874.023	1040.04	1231.08
180.8	-34.79	-18.3105	-6.10352	-5.49316	8.54492	43.335	132.446	278.931	484.009	698.853	880.737	1040.04	1221.92
180.9	-35.4004	-19.5312	-14.0381	-6.10352	7.93457	46.3867	137.329	274.658	479.126	711.06	875.244	1036.38	1222.53
181	-28.0762	-19.5312	-12.8174	-9.76562	6.10352	42.1143	133.057	273.438	493.774	712.28	875.244	1042.48	1215.21
181.1	-29.2969	-20.752	-8.54492	-1.83105	8.54492	43.335	134.277	271.606	487.061	709.229	878.906	1042.48	1218.87
181.2	-26.8555	-20.1416	-10.9863	-4.88281	7.93457	39.6729	138.55	275.879	484.619	706.177	872.803	1046.14	1224.37
181.3	-39.0625	-18.9209	-16.4795	-4.88281	7.32422	40.2832	145.264	274.658	487.061	704.956	878.906	1042.48	1224.98
181.4	-39.0625	-20.752	-12.207	-6.10352	4.88281	43.9453	142.212	275.879	487.061	704.346	880.737	1043.7	1229.86
181.5	-36.6211	-17.7002	-8.54492	-3.05176	10.9863	46.3867	142.212	275.879	487.671	709.229	873.413	1044.92	1232.91
181.6	-27.4658	-19.5312	-9.15527	-8.54492	10.9863	49.4385	144.653	274.658	483.398	708.008	874.634	1044.92	1237.18
181.7	-36.6211	-20.752	-9.15527	-3.05176	10.376	40.2832	146.484	271.606	483.398	709.229	881.958	1047.36	1235.35
181.8	-40.8936	-18.9209	-7.32422	-5.49316	8.54492	49.4385	148.315	280.151	480.347	711.67	872.192	1052.25	1229.25
181.9	-43.9453	-21.3623	-13.4277	-4.27246	10.9863	43.9453	140.991	278.32	479.736	715.332	877.075	1047.36	1229.25
182	-34.79	-25.6348	-11.5967	-3.66211	7.93457	45.7764	147.705	285.034	487.671	711.67	881.958	1046.14	1225.59
182.1	-39.0625	-17.0898	-12.8174	-4.27246	9.15527	46.9971	148.926	288.696	484.619	720.825	883.179	1048.58	1231.08
182.2	-33.5693	-22.583	-10.376	-0.610352	17.0898	43.335	151.978	283.203	480.347	721.436	886.841	1051.64	1234.13
182.3	-36.6211	-20.1416	-11.5967	-4.88281	15.2588	39.6729	145.874	281.372	484.009	720.825	887.451	1055.3	1230.47
182.4	-41.5039	-20.1416	-9.15527	-1.83105	10.9863	39.6729	144.653	287.476	484.009	722.656	886.23	1058.96	1228.64
182.5	-36.6211	-20.1416	-14.6484	-1.83105	5.49316	46.9971	150.757	291.138	485.229	718.994	887.451	1062.01	1229.86
182.6	-33.5693	-21.9727	-10.9863	-7.93457	12.8174	53.1006	154.419	289.307	481.567	723.267	885.62	1066.28	1231.69
182.7	-31.7383	-19.5312	-12.8174	-6.71387	10.9863	47.6074	155.029	291.138	480.957	725.708	889.893	1062.01	1242.68
182.8	-37.2314	-18.9209	-3.05176	-3.05176	8.54492	47.6074	155.64	296.021	481.567	728.76	891.724	1062.62	1243.29
182.9	-36.0107	-23.1934	-10.9863	-7.32422	12.207	45.166	152.588	284.424	485.84	722.656	893.555	1062.01	1248.17
183	-34.1797	-21.9727	-12.207	-6.10352	10.376	42.7246	147.095	285.034	487.671	725.708	889.893	1064.45	1246.34
183.1	-34.1797	-19.5312	-12.8174	-6.10352	8.54492	48.2178	148.315	285.034	482.788	722.046	892.944	1063.23	1250
183.2	-38.4521	-25.0244	-5.49316	-8.54492	9.76562	50.6592	156.25	285.645	487.671	726.929	888.062	1058.96	1243.9
183.3	-40.8936	-19.5312	-8.54492	-4.27246	6.10352	42.1143	151.367	284.424	491.333	726.929	893.555	1075.44	1250
183.4	-37.8418	-20.1416	-9.15527	-7.32422	6.71387	48.2178	156.25	282.593	488.281	729.98	899.048	1071.17	1243.29
183.5	-37.8418	-18.3105	-9.76562	-1.2207	6.71387	50.0488	151.978	286.865	486.45	733.643	890.503	1070.56	1244.51
183.6	-32.959	-18.3105	-9.76562	-3.66211	9.76562	51.2695	148.926	288.696	489.502	734.863	891.724	1071.17	1245.12
183.7	-34.79	-20.752	-14.0381	-5.49316	7.32422	50.6592	153.198	288.696	489.502	733.643	890.503	1075.44	1242.07
183.8	-31.7383	-29.2969	-13.4277	-1.2207	10.9863	48.2178	151.367	288.086	497.437	732.422	886.23	1077.88	1247.56
183.9	-29.9072	-20.1416	-13.4277	-4.27246	10.376	49.4385	147.095	290.527	488.281	731.201	890.503	1081.54	1246.34
184	-32.959	-20.1416	-9.76562	-3.05176	7.93457	45.166	155.64	289.917	494.385	729.37	892.334	1090.7	1248.78
184.1	-36.0107	-18.3105	-9.76562	-0.610352	3.05176	42.7246	150.757	289.307	496.826	734.863	897.217	1087.65	1246.95
184.2	-32.959	-27.4658	-9.76562	-7.32422	15.2588	47.6074	155.64	285.645	491.333	734.253	898.438	1086.43	1245.12
184.3	-30.5176	-18.3105	-6.10352	-5.49316	7.93457	46.9971	150.146	286.255	490.112	734.863	897.217	1090.09	1255.49
184.4	-35.4004	-25.0244	-11.5967	-3.05176	13.4277	49.4385	158.691	289.307	498.657	737.305	898.438	1088.87	1251.83
184.5	-32.959	-20.752	-12.207	-7.32422	7.32422	52.4902	156.25	294.189	490.112	736.084	901.489	1088.87	1251.22
184.6	-34.79	-21.3623	-10.9863	-6.10352	9.76562	46.3867	158.081	294.189	495.605	745.239	895.996	1091.92	1250
184.7	-34.79	-14.0381	-13.4277	-9.76562	15.8691	54.9316	157.471	296.021	494.995	740.356	903.32	1098.02	1243.9
184.8	-35.4004	-22.583	-15.2588	-8.54492	3.05176	51.2695	159.912	295.41	494.995	746.46	906.372	1090.7	1245.12
184.9	-37.8418	-23.8037	-8.54492	-8.54492	9.76562	50.6592	161.743	302.124	499.878	736.694	904.541	1088.26	1253.66
185	-36.6211	-22.583	-11.5967	-9.15527	12.8174	50.6592	160.522	294.8	501.709	743.408	907.593	1090.7	1256.71
185.1	-35.4004	-18.3105	-8.54492	-3.05176	12.207	56.7627	156.25	296.631	495.605	736.084	899.048	1090.09	1250
185.2	-41.5039	-24.4141	-15.8691	-3.66211	15.2588	50.6592	159.912	297.852	504.15	740.967	900.879	1086.43	1256.1
185.3	-37.2314	-24.4141	-21.3623	-1.83105	13.4277	52.4902	162.964	295.41	502.93	749.512	903.32	1094.97	1250.61
185.4	-32.3486	-20.1416	-9.76562	-4.88281	5.49316	51.8799	161.133	296.021	496.216	740.967	900.269	1096.8	1242.68
185.5	-34.1797	-21.9727	-7.32422	-1.2207	12.207	48.8281	155.64	299.072	501.709	743.408	905.151	1095.58	1246.95
185.6	-36.0107	-22.583	-9.76562	-4.88281	11.5967	49.4385	163.574	301.514	496.216	737.915	905.762	1096.8	1242.07
185.7	-35.4004	-19.5312	-9.15527	-9.15527	12.8174	45.7764	153.809	299.072	509.033	743.408	907.593	1096.8	1250.61
185.8	-40.2832	-21.9727	-13.4277	-10.376	12.8174	50.6592	159.912	300.293	501.099	747.07	913.086	1101.68	1247.56
185.9	-32.3486	-17.7002	-10.376	-6.71387	10.9863	51.2695	153.809	303.955	504.15	742.188	908.203	1094.97	1250
186	-33.5693	-23.8037	-17.7002	-4.88281	10.9863	51.2695	155.029	307.617	509.644	745.239	916.748	1102.29	1246.95
186.1	-32.3486	-17.7002	-9.15527	-1.83105	12.8174	41.5039	161.743	304.565	509.033	745.239	915.527	1098.63	1245.73
186.2	-32.959	-23.1934	-12.207	-9.76562	5.49316	54.3213	158.081	302.124	509.033	744.629	905.151	1099.85	1255.49
186.3	-32.3486	-21.9727	-11.5967	-8.54492	12.207	53.7109	164.185	304.565	504.15	746.46	908.203	1096.8	1251.83
186.4	-37.8418	-25.6348	-3.66211	-8.54492	18.9209	61.0352	158.081	303.955	508.423	746.46	914.307	1098.02	1251.83
186.5	-31.7383	-19.5312	-8.54492	-3.66211	7.32422	52.4902	160.522	299.683	502.93	746.46	910.645	1109.01	1251.22
186.6	-35.4004	-20.752	-12.8174	-6.71387	14.6484	56.1523	156.25	299.683	502.319	745.239	910.645	1107.18	1251.22
186.7	-33.5693	-20.752	-9.15527	0	7.93457	53.1006	158.081	299.683	512.695	745.85	906.982	1113.28	1254.27
186.8	-36.6211	-17.7002	-9.76562	-7.32422	12.207	57.9834	162.354	309.448	507.812	745.239	912.476	1104.74	1260.38
186.9	-38.4521	-20.752	-11.5967	-1.2207	13.4277	55.542	168.457	302.124	509.033	745.239	921.021	1112.06	1254.88
187	-35.4004	-21.9727	-10.376	-6.71387	15.8691	52.4902	167.847	308.228	501.709	744.019	919.189	1110.23	1255.49
187.1	-32.959	-21.9727	-9.15527	-10.9863	9.15527	56.7627	164.795	301.514	507.202	739.746	922.241	1103.52	1252.44
187.2	-28.6865	-17.7002	-12.207	-6.71387	9.76562	58.5938	164.795	308.838	512.085	750.732	922.852	1104.13	1255.49
187.3	-34.1797	-21.3623	-13.4277	-3.66211	15.8691	52.4902	166.626	300.903	504.761	748.901	922.241	1105.96	1259.16
187.4	-29.2969	-21.9727	-16.4795	-4.88281	13.4277	53.7109	169.678	305.786	505.371	742.798	921.021	1109.62	1262.21
187.5	-34.79	-14.6484	-10.376	-7.93457	11.5967	53.7109	162.354	305.176	513.916	745.239	931.396	1110.23	1260.99
187.6	-37.2314	-16.4795	-12.207	-7.93457	13.4277	58.5938	164.185	303.345	507.202	748.901	927.734	1110.84	1260.99
187.7	-34.1797	-15.8691	-10.376	-6.10352	10.376	55.542	164.185	303.955	505.981	749.512	926.514	1107.18	1267.7
187.8	-36.6211	-21.9727	-14.6484	-4.88281	15.2588	55.542	166.016	307.617	509.644	748.901	931.396	1099.24	1267.7
187.9	-36.0107	-16.4795	-7.93457	-2.44141	12.8174	57.373	166.016	306.396	507.812	745.239	933.228	1107.79	1265.87
188	-36.0107	-27.4658	-9.76562	-3.66211	9.15527	54.9316	162.354	312.5	510.864	744.629	939.941	1101.07	1263.43
188.1	-35.4004	-15.2588	-10.9863	-10.9863	18.3105	52.4902	162.354	311.279	515.137	739.136	939.331	1105.96	1269.53
188.2	-34.79	-25.0244	-12.207	-7.32422	12.207	56.1523	163.574	313.721	513.916	743.408	938.721	1098.02	1273.19
188.3	-34.79	-18.9209	-14.0381	-6.10352	14.0381	55.542	161.743	324.097	512.695	744.019	942.383	1104.13	1269.53
188.4	-35.4004	-21.9727	-7.93457	-3.66211	19.5312	52.4902	163.574	318.604	512.085	751.343	939.941	1104.13	1273.19
188.5	-32.3486	-17.7002	-10.376	-1.2207	18.3105	56.7627	167.847	314.331	510.864	747.07	947.266	1104.74	1272.58
188.6	-35.4004	-21.9727	-11.5967	-6.10352	13.4277	53.7109	164.185	322.876	515.747	750.122	949.097	1101.68	1264.65
188.7	-29.9072	-14.0381	-11.5967	-7.32422	12.207	52.4902	167.236	319.214	510.254	747.681	952.148	1095.58	1267.09
188.8	-33.5693	-21.3623	-9.76562	-1.83105	15.2588	56.7627	168.457	322.266	510.864	745.239	953.979	1104.13	1265.26
188.9	-33.5693	-19.5312	-12.8174	-4.27246	11.5967	50.0488	170.288	329.59	514.526	744.019	947.266	1101.07	1262.21
189	-36.0107	-20.1416	-15.2588	-7.93457	12.207	52.4902	174.561	325.317	513.916	745.239	954.59	1101.68	1276.86
189.1	-32.959	-26.8555	-18.3105	-6.71387	14.6484	52.4902	171.509	327.148	519.409	746.46	952.148	1094.97	1267.09
189.2	-32.959	-24.4141	-11.5967	-7.32422	17.0898	54.9316	167.847	328.979	527.344	747.681	950.317	1099.85	1263.43
189.3	-39.0625	-19.5312	-7.32422	-6.10352	15.2588	50.6592	164.795	323.486	525.513	749.512	950.928	1105.96	1262.21
189.4	-34.1797	-21.9727	-8.54492	-8.54492	14.6484	46.9971	172.119	327.148	523.071	756.226	948.486	1099.24	1274.41
189.5	-38.4521	-17.0898	-14.0381	1.83105	13.4277	52.4902	171.509	326.538	527.954	745.239	950.928	1102.29	1270.14
189.6	-37.8418	-25.6348	-10.376	-2.44141	12.8174	51.8799	169.067	322.266	529.785	755.615	953.369	1109.01	1271.97
189.7	-35.4004	-23.8037	-10.376	1.2207	14.0381	59.8145	172.119	323.486	535.278	761.108	945.435	1113.28	1271.97
189.8	-42.7246	-19.5312	-7.93457	-1.83105	14.6484	59.2041	169.067	327.759	531.616	761.719	940.552	1111.45	1279.3
189.9	-36.0107	-19.5312	-14.0381	-0.610352	11.5967	51.8799	173.95	324.707	526.733	753.174	946.655	1118.77	1274.41
190	-35.4004	-15.8691	-6.71387	-1.2207	14.0381	52.4902	175.781	327.148	534.058	763.55	944.214	1107.18	1283.57
190.1	-36.6211	-15.8691	-14.6484	-5.49316	12.8174	59.2041	172.729	332.031	534.668	762.939	944.824	1113.89	1283.57
190.2	-39.0625	-23.8037	-5.49316	0	14.6484	57.373	177.002	333.252	533.447	767.212	944.824	1109.01	1280.52
190.3	-41.5039	-15.8691	-15.8691	-4.88281	16.4795	53.7109	175.781	333.252	532.227	762.329	944.824	1107.79	1287.23
190.4	-37.2314	-20.1416	-11.5967	-3.05176	12.207	53.1006	179.443	331.421	526.123	764.16	941.162	1113.28	1290.28
190.5	-40.8936	-18.3105	-9.76562	-5.49316	12.8174	54.9316	173.34	328.369	538.94	755.615	942.383	1115.72	1286.01
190.6	-37.8418	-22.583	-14.6484	-0.610352	12.207	51.2695	174.561	335.693	529.785	759.888	944.824	1114.5	1285.4
190.7	-36.6211	-17.7002	-8.54492	-6.10352	14.0381	55.542	167.847	334.473	537.109	752.563	942.383	1110.23	1288.45
190.8	-37.2314	-17.7002	-17.0898	-3.66211	9.76562	53.7109	167.847	335.083	538.94	755.005	938.721	1118.16	1280.52
190.9	-37.2314	-18.9209	-17.0898	-9.76562	21.3623	60.4248	177.002	336.304	540.161	754.395	939.941	1117.55	1281.74
191	-33.5693	-20.752	-14.6484	0	15.8691	54.3213	175.781	336.304	538.33	750.732	939.331	1122.44	1285.4
191.1	-40.2832	-15.8691	-11.5967	0.610352	9.76562	54.3213	169.678	336.914	542.603	761.719	939.331	1124.27	1286.62
191.2	-38.4521	-21.3623	-12.207	-3.66211	11.5967	51.8799	173.34	334.473	541.992	762.939	938.721	1123.05	1287.23
191.3	-36.6211	-15.8691	-12.207	-7.93457	12.207	56.7627	173.34	336.304	548.096	767.212	936.89	1126.1	1286.01
191.4	-38.4521	-18.3105	-14.6484	-0.610352	17.0898	56.1523	170.288	338.135	542.603	762.939	935.669	1132.81	1283.57
191.5	-37.2314	-21.9727	-10.9863	-9.15527	17.7002	57.373	172.119	330.811	545.654	766.602	936.89	1129.76	1285.4
191.6	-38.4521	-19.5312	-9.15527	-3.05176	12.8174	53.7109	172.729	341.797	539.551	761.719	938.721	1130.37	1287.84
191.7	-40.2832	-18.3105	-12.8174	-5.49316	10.376	57.373	173.34	332.642	540.161	764.771	935.669	1135.25	1287.23
191.8	-38.4521	-20.752	-14.0381	-3.05176	14.6484	61.0352	174.561	337.524	543.213	761.108	943.604	1134.64	1293.95
191.9	-35.4004	-15.8691	-13.4277	-7.93457	12.207	63.4766	171.509	339.355	541.992	762.939	947.876	1134.64	1292.11
192	-35.4004	-18.3105	-14.6484	-7.93457	7.93457	57.373	178.833	338.745	552.368	762.329	946.045	1131.59	1290.28
192.1	-39.6729	-19.5312	-9.76562	-7.93457	15.8691	61.0352	167.847	340.576	549.927	765.991	946.045	1134.03	1286.01
192.2	-34.79	-17.7002	-17.0898	-4.27246	12.8174	54.9316	173.34	338.135	547.485	765.381	948.486	1135.25	1284.79
192.3	-37.2314	-18.3105	-12.207	-2.44141	15.2588	59.8145	172.119	335.693	551.147	773.315	950.317	1134.64	1292.72
192.4	-40.2832	-17.0898	-10.376	-4.27246	14.0381	55.542	180.054	341.797	552.979	769.653	943.604	1128.54	1292.11
192.5	-37.2314	-22.583	-10.376	-4.27246	13.4277	56.1523	180.664	343.018	554.81	773.926	947.876	1130.37	1301.27
192.6	-39.0625	-20.752	-10.376	-0.610352	15.8691	61.6455	176.392	345.459	554.199	778.198	948.486	1126.1	1297.61
192.7	-37.8418	-23.1934	-11.5967	-2.44141	11.5967	56.7627	177.612	343.628	549.927	775.146	947.876	1134.03	1299.44
192.8	-32.959	-21.3623	-5.49316	-8.54492	14.0381	54.9316	178.833	347.29	554.81	778.809	947.266	1130.37	1299.44
192.9	-40.2832	-18.9209	-9.15527	-3.05176	18.3105	64.6973	184.937	342.407	548.096	783.691	958.862	1130.98	1300.05
193	-40.2832	-21.9727	-9.15527	-6.10352	13.4277	57.9834	181.885	350.342	551.758	784.912	949.097	1129.15	1301.88
193.1	-40.2832	-25.0244	-10.9863	-0.610352	12.207	51.2695	184.326	349.731	541.382	781.86	949.097	1135.86	1306.15
193.2	-45.166	-22.583	-10.376	-3.05176	15.2588	56.1523	183.716	353.394	546.875	791.016	952.759	1134.64	1307.37
193.3	-40.8936	-23.8037	-14.0381	-4.88281	10.9863	60.4248	184.326	345.459	541.382	786.743	955.2	1138.31	1305.54
193.4	-37.2314	-20.752	-12.8174	-7.32422	14.6484	58.5938	183.716	352.783	545.044	787.964	955.2	1143.8	1306.15
193.5	-37.8418	-21.3623	-10.376	-2.44141	10.9863	54.3213	181.274	350.342	540.771	784.302	957.031	1139.53	1300.05
193.6	-34.1797	-17.0898	-14.6484	-3.66211	9.76562	61.6455	183.716	349.121	543.823	787.354	960.083	1135.86	1312.87
193.7	-29.2969	-17.7002	-12.207	-4.27246	12.8174	54.3213	184.326	349.731	543.213	789.795	953.979	1141.36	1307.98
193.8	-38.4521	-15.2588	-15.8691	-3.66211	16.4795	56.7627	186.157	351.562	544.434	792.236	955.811	1137.7	1310.42
193.9	-43.335	-18.3105	-9.76562	-0.610352	10.9863	52.4902	180.664	351.562	551.147	791.626	952.759	1137.7	1310.42
194	-40.2832	-15.8691	-15.8691	1.2207	9.15527	59.2041	179.443	351.562	551.758	787.964	960.693	1136.47	1312.87
194.1	-36.6211	-17.0898	-14.6484	-1.83105	18.3105	51.8799	184.326	346.68	549.927	794.067	967.407	1137.08	1315.92
194.2	-34.1797	-21.9727	-9.15527	-7.32422	17.7002	52.4902	186.768	348.511	555.42	792.236	964.966	1148.68	1306.76
194.3	-34.1797	-20.1416	-14.0381	-3.05176	10.9863	57.9834	186.768	346.68	553.589	794.678	969.238	1141.97	1312.87
194.4	-34.1797	-15.2588	-13.4277	-3.05176	13.4277	62.8662	181.885	351.562	550.537	795.288	964.355	1141.36	1315.92
194.5	-39.0625	-18.9209	-9.76562	-4.88281	21.3623	58.5938	181.885	350.952	554.81	795.898	969.238	1146.85	1320.19
194.6	-35.4004	-20.752	-12.8174	-8.54492	12.8174	59.8145	188.599	349.121	553.589	801.392	968.628	1143.8	1318.36
194.7	-36.6211	-23.1934	-4.88281	-3.05176	14.6484	61.6455	183.716	358.276	555.42	797.119	967.407	1144.41	1327.51
194.8	-39.0625	-17.0898	-12.8174	-6.71387	12.8174	61.6455	188.599	350.952	560.913	800.781	968.018	1146.24	1319.58
194.9	-37.8418	-17.0898	-10.376	-1.2207	17.7002	64.6973	189.209	349.731	556.641	794.067	971.68	1140.75	1321.41
195	-37.2314	-18.3105	-10.376	3.05176	17.0898	61.0352	185.547	352.783	564.575	801.392	969.849	1141.36	1331.79
195.1	-31.7383	-21.3623	-11.5967	-4.88281	15.2588	61.6455	181.885	357.056	556.641	805.664	975.952	1147.46	1329.35
195.2	-37.8418	-26.8555	-9.76562	-3.66211	15.2588	59.8145	184.937	355.835	556.03	804.443	969.849	1144.41	1325.68
195.3	-39.0625	-17.0898	-13.4277	-4.88281	15.8691	55.542	180.664	356.445	554.81	806.885	972.29	1149.29	1327.51
195.4	-34.79	-19.5312	-11.5967	-6.71387	18.3105	56.7627	186.157	359.497	559.692	800.171	976.562	1151.73	1330.57
195.5	-32.3486	-17.7002	-9.15527	-6.10352	7.93457	61.6455	190.43	360.107	560.303	805.054	977.783	1151.73	1321.41
195.6	-39.0625	-21.9727	-6.10352	-0.610352	6.71387	63.4766	184.326	354.004	560.303	808.716	985.718	1146.85	1329.35
195.7	-32.3486	-14.6484	-10.9863	-9.15527	14.0381	62.2559	187.988	360.107	559.692	809.937	983.276	1151.12	1340.94
195.8	-37.2314	-20.1416	-9.76562	-5.49316	10.376	63.4766	185.547	358.887	568.848	810.547	980.225	1145.02	1338.5
195.9	-34.79	-23.8037	-7.93457	-4.27246	9.15527	64.6973	189.209	360.718	556.641	807.495	983.276	1151.73	1337.89
196	-31.1279	-21.3623	-11.5967	-3.05176	12.8174	65.918	187.378	357.666	557.861	809.326	982.666	1147.46	1336.06
196.1	-36.0107	-14.6484	-13.4277	0	10.9863	66.5283	189.819	361.328	562.744	817.871	979.004	1151.12	1353.15
196.2	-30.5176	-19.5312	-15.8691	-3.05176	10.376	64.0869	189.819	363.77	566.406	822.144	978.394	1149.9	1350.1
196.3	-33.5693	-16.4795	-8.54492	-3.05176	11.5967	63.4766	190.43	364.38	561.523	819.092	982.666	1155.4	1343.99
196.4	-40.8936	-21.3623	-12.207	-0.610352	10.9863	63.4766	187.378	354.004	567.627	819.702	982.666	1157.23	1350.1
196.5	-38.4521	-19.5312	-8.54492	-6.71387	15.8691	64.6973	189.209	358.887	573.12	817.261	989.99	1155.4	1340.33
196.6	-42.7246	-24.4141	-8.54492	-6.10352	18.3105	64.6973	183.716	363.77	564.575	812.378	989.38	1158.45	1347.66
196.7	-37.2314	-17.0898	-9.15527	-3.66211	12.207	62.8662	186.157	361.938	564.575	820.312	985.718	1156.62	1347.05
196.8	-35.4004	-18.3105	-10.9863	-3.66211	15.2588	64.6973	186.157	354.004	569.458	820.923	988.77	1166.38	1345.21
196.9	-37.2314	-20.752	-13.4277	-4.88281	14.6484	64.0869	186.157	357.666	566.406	809.937	991.211	1164.55	1350.1
197	-36.6211	-18.3105	-9.15527	0	13.4277	67.1387	180.054	357.666	566.406	817.261	996.704	1160.89	1353.15
197.1	-33.5693	-21.9727	-9.76562	3.05176	17.0898	64.0869	187.378	358.276	557.861	816.65	989.38	1164.55	1349.49
197.2	-40.8936	-18.9209	-4.88281	-0.610352	14.0381	65.918	189.819	358.276	566.406	819.702	996.704	1163.94	1356.81
197.3	-38.4521	-25.0244	-9.76562	-10.9863	13.4277	67.1387	185.547	357.666	569.458	818.481	996.094	1170.04	1351.32
197.4	-34.1797	-17.0898	-10.376	-5.49316	12.207	68.3594	183.105	360.107	570.068	819.092	997.925	1180.42	1351.32
197.5	-38.4521	-17.7002	-12.207	-1.83105	18.3105	69.5801	185.547	363.77	569.458	816.04	998.535	1176.15	1354.37
197.6	-36.0107	-18.3105	-9.15527	-1.83105	15.8691	71.4111	186.768	357.056	577.393	820.923	1000.37	1174.93	1362.92
197.7	-30.5176	-17.0898	-2.44141	-6.71387	10.376	66.5283	182.495	358.276	576.782	817.261	991.821	1167.6	1354.98
197.8	-29.2969	-19.5312	-12.207	-6.10352	11.5967	70.1904	189.819	366.211	568.237	830.688	985.107	1173.1	1358.03
197.9	-34.79	-13.4277	-5.49316	-4.27246	8.54492	65.918	181.274	358.276	568.848	825.806	985.718	1168.21	1357.42
198	-36.6211	-23.1934	-9.76562	-4.27246	14.0381	72.6318	191.04	359.497	573.12	827.637	994.873	1176.76	1361.69
198.1	-33.5693	-25.0244	-15.2588	-3.66211	17.0898	65.3076	188.599	356.445	570.068	827.026	985.107	1171.88	1351.32
198.2	-32.959	-23.1934	-7.32422	-1.83105	16.4795	65.3076	190.43	361.938	563.965	825.195	985.107	1171.88	1353.15
198.3	-31.7383	-12.8174	-3.05176	-6.71387	12.8174	70.1904	191.65	364.99	571.289	827.637	996.704	1174.32	1359.25
198.4	-36.0107	-18.9209	-12.8174	-3.66211	9.76562	74.4629	194.092	361.938	566.406	822.754	989.99	1177.37	1356.2
198.5	-36.0107	-22.583	-12.207	-4.88281	17.7002	73.2422	195.312	366.211	565.186	827.026	989.99	1171.88	1359.25
198.6	-37.2314	-18.9209	-9.76562	-8.54492	14.6484	68.3594	187.988	357.666	560.303	831.909	983.276	1179.2	1359.86
198.7	-31.7383	-21.9727	-9.76562	-1.83105	17.7002	71.4111	194.092	359.497	566.406	833.13	1002.2	1184.69	1362.92
198.8	-34.79	-18.9209	-8.54492	-3.05176	15.8691	69.5801	192.871	361.938	568.848	825.195	989.38	1179.2	1360.47
198.9	-28.6865	-15.2588	-6.71387	-1.2207	14.0381	64.6973	187.988	357.056	569.458	823.364	991.211	1180.42	1367.19
199	-37.8418	-16.4795	-14.0381	-3.66211	17.7002	65.918	197.144	361.938	567.627	825.195	999.146	1181.64	1359.25
199.1	-30.5176	-19.5312	-10.376	1.2207	17.7002	72.0215	194.702	361.938	566.406	823.975	998.535	1182.25	1357.42
199.2	-37.8418	-16.4795	-8.54492	-4.27246	17.0898	70.8008	189.209	363.77	570.068	831.909	1000.98	1180.42	1356.81
199.3	-37.8418	-17.7002	-10.376	-9.76562	17.7002	71.4111	189.209	363.77	567.627	830.688	1004.64	1184.69	1356.2
199.4	-40.2832	-17.0898	-4.27246	-3.66211	14.0381	74.4629	192.261	364.99	568.848	830.078	999.756	1179.2	1354.98
199.5	-38.4521	-24.4141	-2.44141	-4.88281	16.4795	69.5801	184.937	365.601	568.848	830.078	1004.03	1188.35	1356.81
199.6	-34.79	-19.5312	-14.0381	-2.44141	9.76562	69.5801	195.312	370.483	567.017	830.688	1001.59	1188.96	1361.08
199.7	-35.4004	-18.9209	-12.207	-1.83105	12.207	69.5801	186.157	370.483	559.082	827.026	1000.98	1181.03	1362.3
199.8	-36.6211	-25.0244	-12.207	2.44141	16.4795	68.3594	189.209	366.211	563.965	825.195	1008.3	1187.74	1358.03
199.9	-42.7246	-16.4795	-14.0381	-4.88281	7.32422	72.0215	199.585	374.756	576.782	827.026	1000.37	1187.13	1363.53
[truncated: 9,501 more rows]

## Sheet: WT 2
0	-67.1387	-65.3076	-64.0869	-68.9697	-64.6973	-59.2041	-68.9697	-65.3076	-62.2559	-55.542	-50.6592	-50.0488	-51.8799
0.1	-64.6973	-72.0215	-67.749	-64.6973	-65.3076	-67.749	-64.6973	-62.2559	-63.4766	-61.0352	-52.4902	-55.542	-53.1006
0.2	-64.6973	-66.5283	-64.0869	-60.4248	-67.1387	-63.4766	-61.6455	-67.749	-59.2041	-53.7109	-50.0488	-45.7764	-54.3213
0.3	-59.2041	-77.5146	-68.9697	-69.5801	-70.8008	-70.8008	-64.6973	-68.3594	-65.3076	-54.3213	-57.9834	-48.2178	-61.0352
0.4	-69.5801	-68.3594	-62.8662	-69.5801	-69.5801	-70.8008	-59.8145	-67.749	-63.4766	-55.542	-56.1523	-46.3867	-54.9316
0.5	-66.5283	-80.5664	-75.0732	-63.4766	-68.3594	-61.6455	-68.9697	-62.8662	-61.0352	-58.5938	-59.8145	-49.4385	-58.5938
0.6	-70.1904	-67.749	-72.6318	-64.0869	-71.4111	-69.5801	-63.4766	-56.7627	-60.4248	-53.7109	-51.8799	-52.4902	-59.2041
0.7	-68.3594	-70.8008	-57.9834	-68.9697	-65.3076	-67.749	-59.2041	-63.4766	-59.2041	-57.373	-60.4248	-51.8799	-52.4902
0.8	-59.2041	-70.8008	-67.749	-67.1387	-67.1387	-64.6973	-63.4766	-56.1523	-59.8145	-57.9834	-53.7109	-46.3867	-59.2041
0.9	-69.5801	-71.4111	-71.4111	-64.0869	-68.3594	-61.0352	-66.5283	-54.9316	-57.9834	-61.6455	-57.9834	-52.4902	-50.0488
1	-67.1387	-73.8525	-64.6973	-73.2422	-70.8008	-70.1904	-64.6973	-59.2041	-61.0352	-64.6973	-54.9316	-42.7246	-51.2695
1.1	-62.8662	-68.3594	-63.4766	-64.0869	-71.4111	-64.0869	-68.3594	-59.2041	-59.2041	-56.1523	-56.7627	-49.4385	-53.1006
1.2	-66.5283	-70.1904	-65.3076	-72.0215	-72.6318	-62.8662	-69.5801	-53.1006	-65.918	-60.4248	-51.8799	-51.2695	-53.1006
1.3	-65.3076	-67.749	-65.918	-67.749	-69.5801	-68.9697	-62.2559	-62.2559	-61.6455	-63.4766	-56.1523	-48.8281	-54.9316
1.4	-65.3076	-68.9697	-62.8662	-70.8008	-68.3594	-67.1387	-68.3594	-63.4766	-59.8145	-57.9834	-52.4902	-49.4385	-54.9316
1.5	-69.5801	-68.3594	-65.3076	-66.5283	-68.3594	-65.3076	-65.3076	-58.5938	-62.8662	-57.9834	-51.2695	-53.1006	-54.3213
1.6	-67.1387	-68.3594	-64.0869	-71.4111	-66.5283	-59.2041	-67.749	-66.5283	-57.9834	-57.373	-56.7627	-51.2695	-49.4385
1.7	-73.2422	-71.4111	-68.3594	-63.4766	-67.749	-59.8145	-64.0869	-65.3076	-61.6455	-56.1523	-53.1006	-53.7109	-52.4902
1.8	-68.3594	-68.9697	-69.5801	-70.8008	-75.0732	-70.1904	-62.8662	-66.5283	-61.6455	-59.2041	-51.2695	-56.7627	-56.1523
1.9	-66.5283	-70.8008	-63.4766	-75.0732	-70.1904	-67.1387	-68.3594	-64.0869	-62.8662	-64.0869	-53.7109	-49.4385	-57.373
2	-64.6973	-72.6318	-63.4766	-69.5801	-74.4629	-67.749	-61.0352	-61.0352	-62.2559	-61.0352	-56.1523	-58.5938	-46.9971
2.1	-74.4629	-70.8008	-68.3594	-72.0215	-64.6973	-67.749	-73.2422	-64.6973	-61.6455	-56.7627	-50.6592	-48.8281	-50.6592
2.2	-68.3594	-73.2422	-61.6455	-66.5283	-71.4111	-65.3076	-67.749	-60.4248	-58.5938	-60.4248	-54.9316	-57.373	-56.1523
2.3	-73.2422	-80.5664	-68.3594	-70.8008	-72.0215	-64.6973	-61.0352	-60.4248	-61.0352	-58.5938	-50.0488	-59.2041	-56.1523
2.4	-65.918	-70.1904	-65.918	-71.4111	-72.0215	-63.4766	-68.3594	-67.749	-58.5938	-54.3213	-57.9834	-47.6074	-51.8799
2.5	-65.918	-69.5801	-72.0215	-66.5283	-75.0732	-65.918	-63.4766	-72.6318	-57.9834	-53.1006	-54.9316	-57.373	-46.9971
2.6	-61.0352	-68.3594	-68.3594	-73.2422	-73.8525	-69.5801	-62.8662	-66.5283	-63.4766	-58.5938	-52.4902	-50.6592	-50.6592
2.7	-67.1387	-63.4766	-63.4766	-65.918	-72.6318	-70.1904	-61.6455	-62.2559	-55.542	-57.9834	-55.542	-54.3213	-49.4385
2.8	-64.6973	-73.2422	-66.5283	-65.918	-73.8525	-67.1387	-63.4766	-66.5283	-57.9834	-54.3213	-54.9316	-53.1006	-53.7109
2.9	-63.4766	-73.8525	-67.749	-70.8008	-70.1904	-67.1387	-67.749	-63.4766	-59.8145	-60.4248	-57.373	-50.6592	-53.1006
3	-67.749	-67.749	-70.8008	-70.1904	-66.5283	-65.918	-64.6973	-66.5283	-61.6455	-61.0352	-54.9316	-61.6455	-57.9834
3.1	-64.6973	-74.4629	-68.3594	-65.3076	-73.2422	-70.1904	-67.749	-62.8662	-56.7627	-58.5938	-48.2178	-51.8799	-53.7109
3.2	-67.749	-72.0215	-70.1904	-73.8525	-65.918	-67.749	-60.4248	-63.4766	-70.1904	-53.7109	-54.3213	-52.4902	-46.3867
3.3	-58.5938	-70.8008	-65.3076	-64.0869	-65.918	-68.3594	-68.3594	-57.373	-61.0352	-59.2041	-48.8281	-47.6074	-52.4902
3.4	-63.4766	-68.9697	-64.0869	-69.5801	-72.0215	-64.6973	-64.0869	-64.6973	-62.2559	-62.8662	-52.4902	-56.1523	-50.6592
3.5	-70.1904	-73.2422	-60.4248	-73.2422	-74.4629	-65.918	-59.8145	-61.0352	-60.4248	-56.1523	-49.4385	-51.2695	-54.9316
3.6	-68.3594	-79.3457	-62.8662	-72.0215	-67.1387	-59.8145	-65.3076	-58.5938	-62.2559	-59.2041	-51.2695	-52.4902	-50.6592
3.7	-63.4766	-71.4111	-67.1387	-75.0732	-67.749	-68.3594	-61.6455	-63.4766	-65.3076	-53.1006	-55.542	-53.7109	-51.2695
3.8	-64.6973	-71.4111	-65.918	-63.4766	-71.4111	-68.3594	-66.5283	-64.6973	-59.2041	-61.0352	-53.1006	-52.4902	-53.1006
3.9	-73.8525	-70.1904	-65.3076	-67.749	-62.8662	-65.918	-64.0869	-60.4248	-56.7627	-59.8145	-50.6592	-54.3213	-49.4385
4	-66.5283	-70.8008	-65.3076	-66.5283	-72.6318	-65.918	-68.3594	-62.8662	-62.2559	-61.6455	-54.9316	-51.2695	-45.166
4.1	-61.6455	-70.8008	-64.6973	-72.0215	-70.1904	-66.5283	-64.6973	-59.2041	-54.9316	-61.0352	-50.6592	-52.4902	-45.166
4.2	-65.3076	-69.5801	-65.918	-69.5801	-64.0869	-59.8145	-64.6973	-64.0869	-59.8145	-64.6973	-51.2695	-57.9834	-50.0488
4.3	-59.2041	-68.3594	-67.1387	-70.8008	-70.8008	-68.3594	-60.4248	-67.1387	-58.5938	-61.6455	-46.9971	-51.8799	-48.2178
4.4	-73.8525	-66.5283	-64.6973	-66.5283	-64.6973	-67.1387	-66.5283	-63.4766	-56.7627	-62.2559	-50.0488	-57.9834	-51.8799
4.5	-70.8008	-75.6836	-67.749	-72.6318	-65.918	-62.2559	-63.4766	-56.7627	-62.8662	-57.373	-53.1006	-54.9316	-53.7109
4.6	-67.749	-73.8525	-65.3076	-70.1904	-65.918	-69.5801	-64.6973	-55.542	-63.4766	-59.8145	-52.4902	-50.0488	-50.6592
4.7	-64.6973	-62.2559	-56.1523	-66.5283	-71.4111	-66.5283	-67.1387	-70.8008	-62.8662	-56.1523	-54.9316	-52.4902	-57.9834
4.8	-72.0215	-64.6973	-68.3594	-71.4111	-61.6455	-72.6318	-65.3076	-63.4766	-61.0352	-57.9834	-54.9316	-45.7764	-46.9971
4.9	-68.9697	-81.1768	-62.2559	-68.9697	-61.6455	-68.9697	-58.5938	-61.0352	-62.2559	-59.8145	-56.7627	-56.7627	-48.8281
5	-76.9043	-74.4629	-70.8008	-70.8008	-65.3076	-67.749	-65.918	-62.8662	-60.4248	-60.4248	-49.4385	-50.0488	-49.4385
5.1	-65.3076	-68.9697	-67.1387	-66.5283	-70.8008	-69.5801	-64.0869	-62.2559	-63.4766	-66.5283	-56.1523	-52.4902	-51.8799
5.2	-70.1904	-72.0215	-61.0352	-66.5283	-68.3594	-73.2422	-63.4766	-57.9834	-61.0352	-64.6973	-52.4902	-54.3213	-51.2695
5.3	-64.6973	-75.6836	-62.8662	-66.5283	-67.1387	-68.9697	-57.9834	-69.5801	-64.6973	-57.373	-52.4902	-53.7109	-51.2695
5.4	-62.2559	-71.4111	-67.749	-67.749	-65.3076	-75.6836	-65.918	-64.0869	-67.749	-61.0352	-56.7627	-47.6074	-50.6592
5.5	-60.4248	-68.3594	-61.6455	-72.6318	-72.6318	-69.5801	-65.918	-53.7109	-68.9697	-56.7627	-48.8281	-52.4902	-50.0488
5.6	-69.5801	-68.3594	-67.1387	-66.5283	-64.0869	-69.5801	-65.3076	-68.3594	-59.8145	-56.1523	-55.542	-46.3867	-46.9971
5.7	-61.6455	-69.5801	-62.2559	-66.5283	-65.918	-68.3594	-65.918	-65.918	-67.1387	-56.1523	-53.7109	-54.3213	-53.7109
5.8	-67.749	-68.9697	-66.5283	-69.5801	-65.918	-67.749	-64.0869	-61.6455	-68.9697	-57.9834	-58.5938	-45.166	-49.4385
5.9	-67.1387	-66.5283	-65.918	-75.0732	-69.5801	-65.918	-68.3594	-57.9834	-60.4248	-56.7627	-53.7109	-54.3213	-50.6592
6	-70.8008	-67.1387	-66.5283	-67.749	-67.749	-65.3076	-75.0732	-64.0869	-61.6455	-56.7627	-51.2695	-53.1006	-46.9971
6.1	-59.8145	-68.9697	-65.3076	-71.4111	-73.2422	-66.5283	-68.3594	-67.1387	-63.4766	-59.2041	-43.9453	-58.5938	-45.7764
6.2	-62.8662	-72.0215	-68.9697	-70.1904	-64.0869	-67.1387	-68.3594	-58.5938	-61.0352	-54.3213	-51.8799	-53.7109	-51.8799
6.3	-70.1904	-77.5146	-70.1904	-67.749	-68.3594	-72.6318	-67.1387	-72.0215	-54.9316	-57.373	-52.4902	-58.5938	-54.9316
6.4	-65.918	-72.0215	-68.3594	-68.9697	-72.6318	-68.9697	-66.5283	-62.2559	-65.918	-57.373	-48.2178	-53.7109	-50.0488
6.5	-68.9697	-71.4111	-65.3076	-69.5801	-67.749	-68.9697	-70.1904	-61.6455	-59.8145	-57.373	-55.542	-56.1523	-51.8799
6.6	-64.0869	-66.5283	-63.4766	-66.5283	-70.8008	-71.4111	-65.918	-63.4766	-64.6973	-54.3213	-48.8281	-50.0488	-50.6592
6.7	-71.4111	-67.749	-68.3594	-68.3594	-66.5283	-70.1904	-68.3594	-64.0869	-62.2559	-57.9834	-55.542	-55.542	-47.6074
6.8	-64.6973	-76.9043	-64.0869	-59.8145	-67.749	-70.1904	-61.6455	-58.5938	-60.4248	-59.2041	-47.6074	-57.373	-54.9316
6.9	-75.0732	-69.5801	-70.1904	-65.3076	-70.1904	-70.8008	-62.2559	-64.6973	-61.6455	-59.2041	-50.0488	-46.9971	-50.0488
7	-65.918	-68.9697	-62.8662	-71.4111	-67.749	-71.4111	-62.2559	-62.8662	-57.373	-57.373	-55.542	-54.9316	-61.0352
7.1	-70.1904	-67.749	-66.5283	-63.4766	-62.8662	-67.749	-64.0869	-69.5801	-55.542	-57.373	-55.542	-53.7109	-49.4385
7.2	-70.8008	-72.0215	-63.4766	-67.1387	-71.4111	-71.4111	-65.3076	-61.0352	-62.2559	-63.4766	-54.9316	-48.2178	-48.8281
7.3	-70.8008	-67.1387	-68.9697	-62.8662	-74.4629	-67.1387	-64.6973	-63.4766	-64.0869	-61.0352	-48.2178	-56.7627	-51.2695
7.4	-70.1904	-67.1387	-63.4766	-64.0869	-64.6973	-67.749	-65.3076	-61.6455	-58.5938	-63.4766	-44.5557	-56.7627	-53.1006
7.5	-72.0215	-66.5283	-64.6973	-70.1904	-67.1387	-67.749	-59.8145	-68.9697	-60.4248	-57.9834	-57.373	-52.4902	-48.2178
7.6	-78.125	-74.4629	-64.0869	-70.8008	-64.6973	-68.3594	-57.373	-67.1387	-65.3076	-59.2041	-49.4385	-52.4902	-48.2178
7.7	-72.0215	-70.1904	-62.8662	-70.8008	-65.918	-68.9697	-70.8008	-62.8662	-60.4248	-60.4248	-47.6074	-51.2695	-47.6074
7.8	-65.3076	-67.1387	-63.4766	-67.749	-62.8662	-68.3594	-61.0352	-64.6973	-64.6973	-58.5938	-51.2695	-50.6592	-56.7627
7.9	-68.9697	-64.6973	-69.5801	-69.5801	-68.3594	-71.4111	-57.9834	-67.749	-59.2041	-54.3213	-47.6074	-57.373	-51.2695
8	-72.6318	-69.5801	-63.4766	-67.1387	-64.0869	-68.9697	-65.918	-59.8145	-61.6455	-55.542	-49.4385	-51.2695	-49.4385
8.1	-70.8008	-71.4111	-67.1387	-61.0352	-67.749	-71.4111	-63.4766	-62.2559	-59.2041	-61.6455	-49.4385	-53.1006	-51.2695
8.2	-69.5801	-72.0215	-64.6973	-67.749	-66.5283	-67.749	-62.8662	-57.9834	-58.5938	-53.7109	-55.542	-50.0488	-54.3213
8.3	-71.4111	-73.2422	-64.0869	-64.6973	-72.0215	-70.8008	-64.0869	-62.2559	-65.918	-62.8662	-51.8799	-54.3213	-53.7109
8.4	-62.2559	-67.1387	-70.1904	-70.8008	-70.8008	-68.9697	-64.6973	-62.8662	-59.2041	-56.7627	-50.6592	-46.3867	-51.8799
8.5	-71.4111	-65.918	-71.4111	-68.3594	-68.3594	-68.9697	-62.2559	-59.8145	-61.6455	-59.2041	-47.6074	-51.8799	-47.6074
8.6	-68.9697	-63.4766	-65.3076	-68.9697	-68.3594	-66.5283	-64.6973	-56.1523	-57.9834	-58.5938	-52.4902	-52.4902	-50.6592
8.7	-69.5801	-67.1387	-63.4766	-68.3594	-67.749	-66.5283	-66.5283	-64.0869	-59.8145	-57.373	-57.9834	-53.1006	-50.6592
8.8	-70.1904	-67.1387	-62.2559	-70.8008	-67.749	-68.3594	-65.918	-59.8145	-62.2559	-57.9834	-53.1006	-50.0488	-54.3213
8.9	-72.0215	-72.6318	-61.0352	-70.1904	-67.749	-66.5283	-69.5801	-60.4248	-64.6973	-53.7109	-51.8799	-50.6592	-49.4385
9	-65.918	-72.6318	-67.749	-70.1904	-73.2422	-73.8525	-69.5801	-63.4766	-59.8145	-58.5938	-56.7627	-59.8145	-56.1523
9.1	-65.3076	-71.4111	-64.0869	-68.3594	-73.2422	-66.5283	-61.6455	-63.4766	-61.6455	-58.5938	-56.1523	-46.9971	-49.4385
9.2	-69.5801	-70.8008	-63.4766	-73.2422	-73.8525	-65.3076	-68.9697	-57.9834	-59.2041	-57.373	-50.6592	-54.9316	-47.6074
9.3	-72.0215	-70.1904	-68.9697	-64.6973	-68.9697	-71.4111	-61.0352	-54.9316	-59.8145	-58.5938	-51.8799	-55.542	-52.4902
9.4	-73.2422	-71.4111	-65.918	-65.918	-66.5283	-64.6973	-63.4766	-61.6455	-64.6973	-58.5938	-58.5938	-51.2695	-56.1523
9.5	-61.6455	-68.9697	-69.5801	-73.8525	-70.1904	-72.0215	-63.4766	-63.4766	-66.5283	-57.9834	-49.4385	-52.4902	-53.7109
9.6	-68.3594	-67.1387	-68.3594	-67.749	-72.0215	-68.9697	-65.918	-57.9834	-59.2041	-55.542	-51.8799	-49.4385	-46.9971
9.7	-68.9697	-72.6318	-65.918	-68.3594	-73.8525	-69.5801	-66.5283	-61.6455	-55.542	-59.8145	-56.1523	-57.373	-48.8281
9.8	-67.749	-65.3076	-67.749	-68.3594	-67.1387	-64.6973	-60.4248	-61.0352	-65.918	-64.6973	-51.8799	-55.542	-60.4248
9.9	-70.8008	-73.2422	-57.373	-61.0352	-67.749	-67.749	-65.918	-60.4248	-57.9834	-58.5938	-55.542	-54.3213	-46.9971
10	-67.1387	-74.4629	-69.5801	-65.3076	-76.2939	-63.4766	-67.1387	-64.6973	-68.3594	-54.3213	-56.1523	-50.6592	-56.1523
10.1	-70.8008	-66.5283	-67.749	-62.8662	-73.8525	-70.1904	-69.5801	-58.5938	-68.3594	-52.4902	-47.6074	-56.1523	-51.2695
10.2	-72.6318	-69.5801	-67.1387	-70.8008	-65.3076	-73.2422	-65.918	-61.0352	-64.0869	-65.3076	-53.7109	-56.7627	-47.6074
10.3	-70.1904	-68.9697	-68.9697	-74.4629	-67.749	-64.0869	-61.0352	-59.8145	-66.5283	-55.542	-52.4902	-54.3213	-54.9316
10.4	-72.6318	-68.3594	-68.3594	-70.1904	-66.5283	-63.4766	-65.3076	-59.8145	-64.6973	-54.3213	-52.4902	-53.7109	-47.6074
10.5	-68.9697	-66.5283	-71.4111	-67.749	-70.8008	-69.5801	-64.6973	-59.8145	-65.3076	-57.373	-55.542	-56.1523	-48.8281
10.6	-76.9043	-63.4766	-63.4766	-76.2939	-68.3594	-67.749	-62.8662	-62.8662	-66.5283	-57.9834	-54.3213	-51.2695	-48.2178
10.7	-70.1904	-72.0215	-70.1904	-73.2422	-72.6318	-73.2422	-67.749	-59.2041	-59.8145	-60.4248	-55.542	-53.1006	-51.2695
10.8	-70.8008	-65.918	-69.5801	-64.6973	-69.5801	-71.4111	-65.3076	-65.3076	-63.4766	-56.7627	-50.6592	-54.9316	-55.542
10.9	-68.9697	-76.2939	-66.5283	-63.4766	-68.9697	-72.6318	-62.2559	-58.5938	-56.1523	-61.0352	-50.6592	-56.7627	-47.6074
11	-67.1387	-65.918	-66.5283	-68.3594	-70.1904	-68.9697	-65.918	-63.4766	-58.5938	-57.9834	-48.2178	-52.4902	-59.2041
11.1	-68.9697	-71.4111	-63.4766	-63.4766	-67.749	-70.8008	-62.2559	-59.2041	-60.4248	-59.8145	-50.0488	-52.4902	-46.9971
11.2	-65.3076	-73.2422	-68.9697	-62.8662	-67.1387	-65.918	-65.918	-57.9834	-57.373	-61.0352	-53.7109	-46.3867	-50.0488
11.3	-72.6318	-73.2422	-65.3076	-64.6973	-69.5801	-68.3594	-64.0869	-61.6455	-53.7109	-55.542	-56.7627	-51.2695	-55.542
11.4	-67.749	-67.749	-59.8145	-67.1387	-65.918	-68.9697	-65.918	-61.6455	-62.2559	-58.5938	-50.6592	-55.542	-56.1523
11.5	-74.4629	-74.4629	-68.3594	-71.4111	-69.5801	-68.9697	-67.1387	-65.3076	-58.5938	-56.7627	-54.9316	-53.1006	-56.1523
11.6	-63.4766	-66.5283	-64.6973	-67.749	-67.749	-67.1387	-60.4248	-61.6455	-62.2559	-56.1523	-54.9316	-57.9834	-52.4902
11.7	-61.0352	-69.5801	-71.4111	-67.1387	-64.6973	-65.3076	-62.8662	-68.9697	-60.4248	-59.8145	-50.6592	-53.1006	-62.2559
11.8	-70.1904	-65.3076	-59.2041	-63.4766	-70.8008	-63.4766	-61.6455	-57.373	-59.8145	-64.0869	-46.3867	-55.542	-53.7109
11.9	-71.4111	-69.5801	-65.3076	-71.4111	-67.749	-67.1387	-63.4766	-57.9834	-59.2041	-61.0352	-54.3213	-51.8799	-54.9316
12	-65.3076	-72.0215	-65.3076	-64.0869	-73.8525	-65.3076	-64.6973	-56.1523	-52.4902	-61.0352	-48.2178	-51.8799	-56.7627
12.1	-73.8525	-76.9043	-65.918	-69.5801	-69.5801	-62.8662	-57.373	-62.2559	-50.6592	-60.4248	-48.2178	-51.8799	-51.2695
12.2	-67.1387	-70.8008	-64.6973	-68.3594	-68.9697	-70.8008	-65.3076	-65.3076	-64.6973	-60.4248	-49.4385	-52.4902	-54.9316
12.3	-66.5283	-71.4111	-57.9834	-61.6455	-65.3076	-65.918	-62.8662	-61.6455	-59.8145	-54.3213	-45.166	-57.373	-55.542
12.4	-71.4111	-73.2422	-62.2559	-65.3076	-68.9697	-68.3594	-68.3594	-58.5938	-60.4248	-57.373	-52.4902	-49.4385	-54.9316
12.5	-67.1387	-75.0732	-62.2559	-66.5283	-73.2422	-68.3594	-64.6973	-64.6973	-57.373	-51.2695	-47.6074	-45.166	-53.7109
12.6	-76.2939	-68.3594	-65.3076	-70.1904	-72.6318	-68.3594	-64.6973	-65.3076	-57.9834	-55.542	-45.7764	-55.542	-53.1006
12.7	-64.6973	-72.6318	-62.2559	-65.3076	-70.8008	-64.0869	-61.6455	-64.6973	-51.8799	-54.9316	-46.3867	-49.4385	-50.0488
12.8	-65.3076	-70.8008	-59.8145	-60.4248	-66.5283	-62.8662	-65.918	-61.0352	-61.6455	-54.9316	-48.2178	-51.2695	-51.8799
12.9	-72.6318	-74.4629	-63.4766	-66.5283	-61.6455	-67.1387	-62.8662	-63.4766	-57.9834	-51.8799	-49.4385	-48.8281	-51.8799
13	-65.3076	-70.1904	-59.8145	-64.6973	-65.918	-65.3076	-63.4766	-59.2041	-59.2041	-54.3213	-50.0488	-52.4902	-56.7627
13.1	-69.5801	-76.9043	-62.2559	-65.918	-67.1387	-62.8662	-59.2041	-65.3076	-54.9316	-53.7109	-47.6074	-49.4385	-52.4902
13.2	-65.918	-70.1904	-57.373	-65.3076	-67.1387	-67.1387	-61.0352	-59.8145	-62.2559	-56.1523	-48.8281	-48.2178	-54.9316
13.3	-64.6973	-74.4629	-62.8662	-64.6973	-69.5801	-68.3594	-62.8662	-62.2559	-54.9316	-55.542	-52.4902	-48.8281	-51.2695
13.4	-75.0732	-78.7354	-63.4766	-65.918	-68.3594	-65.918	-62.8662	-58.5938	-56.7627	-56.7627	-44.5557	-56.1523	-54.9316
13.5	-67.1387	-71.4111	-62.8662	-64.0869	-62.2559	-70.1904	-62.2559	-56.7627	-60.4248	-54.9316	-52.4902	-53.7109	-47.6074
13.6	-70.1904	-67.1387	-65.3076	-65.3076	-63.4766	-66.5283	-59.8145	-64.0869	-59.8145	-59.2041	-45.7764	-54.9316	-50.0488
13.7	-62.2559	-72.6318	-61.6455	-62.8662	-70.8008	-73.8525	-66.5283	-62.2559	-51.8799	-59.2041	-51.2695	-51.2695	-48.2178
13.8	-65.918	-72.6318	-59.8145	-62.2559	-69.5801	-71.4111	-64.0869	-57.9834	-59.2041	-53.1006	-52.4902	-56.7627	-51.2695
13.9	-70.1904	-72.0215	-56.7627	-63.4766	-68.9697	-65.3076	-64.0869	-59.2041	-62.2559	-57.373	-46.9971	-50.0488	-54.3213
14	-66.5283	-62.8662	-68.3594	-61.0352	-67.1387	-73.2422	-62.8662	-64.0869	-62.2559	-54.3213	-50.6592	-48.8281	-53.1006
14.1	-70.8008	-69.5801	-63.4766	-62.8662	-64.0869	-70.8008	-73.8525	-64.6973	-57.9834	-54.9316	-50.6592	-54.9316	-47.6074
14.2	-67.749	-75.6836	-65.918	-59.2041	-67.1387	-72.6318	-66.5283	-59.2041	-61.6455	-62.8662	-51.8799	-52.4902	-50.0488
14.3	-68.9697	-76.9043	-68.9697	-61.6455	-80.5664	-72.0215	-65.918	-57.9834	-61.0352	-56.7627	-43.9453	-52.4902	-48.8281
14.4	-68.3594	-72.0215	-59.8145	-66.5283	-70.8008	-72.0215	-61.6455	-57.373	-59.8145	-59.8145	-52.4902	-57.9834	-48.8281
14.5	-68.3594	-71.4111	-66.5283	-64.6973	-70.1904	-70.8008	-68.9697	-59.2041	-60.4248	-54.3213	-48.2178	-43.9453	-55.542
14.6	-72.6318	-71.4111	-67.749	-68.3594	-68.9697	-70.1904	-60.4248	-66.5283	-59.8145	-57.9834	-47.6074	-56.1523	-53.1006
14.7	-68.3594	-70.1904	-65.3076	-67.1387	-70.1904	-72.0215	-58.5938	-59.8145	-51.2695	-61.6455	-47.6074	-51.8799	-57.373
14.8	-70.8008	-76.9043	-69.5801	-71.4111	-68.9697	-68.9697	-62.8662	-65.918	-60.4248	-61.6455	-48.8281	-54.3213	-51.2695
14.9	-70.1904	-73.2422	-63.4766	-72.6318	-68.9697	-72.0215	-68.3594	-64.6973	-54.9316	-54.9316	-48.2178	-43.9453	-51.8799
15	-76.2939	-65.918	-67.749	-65.918	-72.6318	-64.6973	-68.9697	-59.2041	-58.5938	-60.4248	-53.7109	-54.9316	-48.8281
15.1	-62.8662	-72.0215	-69.5801	-65.918	-67.1387	-65.918	-62.8662	-65.3076	-57.373	-56.1523	-42.7246	-57.373	-48.8281
15.2	-63.4766	-72.0215	-67.749	-74.4629	-72.0215	-69.5801	-59.8145	-61.0352	-59.2041	-56.1523	-48.2178	-47.6074	-54.9316
15.3	-69.5801	-72.0215	-68.3594	-62.2559	-71.4111	-72.6318	-65.3076	-64.6973	-59.2041	-58.5938	-53.1006	-48.2178	-50.0488
15.4	-72.6318	-75.0732	-61.0352	-71.4111	-70.1904	-74.4629	-70.1904	-64.0869	-57.373	-55.542	-43.335	-51.2695	-53.1006
15.5	-67.1387	-70.8008	-68.3594	-71.4111	-70.1904	-68.3594	-61.6455	-59.2041	-57.9834	-57.9834	-46.3867	-53.7109	-53.1006
15.6	-62.8662	-66.5283	-61.0352	-67.749	-76.9043	-67.749	-62.2559	-59.2041	-65.918	-57.373	-56.7627	-51.2695	-54.9316
15.7	-70.8008	-70.1904	-64.6973	-66.5283	-67.749	-65.918	-70.1904	-63.4766	-59.8145	-64.0869	-48.2178	-46.9971	-51.2695
15.8	-73.8525	-73.2422	-62.8662	-75.0732	-73.2422	-60.4248	-72.0215	-59.8145	-59.2041	-53.7109	-54.9316	-49.4385	-48.2178
15.9	-77.5146	-68.9697	-65.918	-72.6318	-68.9697	-68.3594	-67.1387	-55.542	-59.8145	-58.5938	-43.9453	-49.4385	-47.6074
16	-71.4111	-67.749	-62.2559	-67.749	-67.1387	-68.9697	-65.3076	-62.2559	-64.0869	-59.2041	-57.9834	-49.4385	-51.2695
16.1	-72.0215	-68.3594	-66.5283	-69.5801	-75.0732	-62.2559	-67.749	-59.2041	-63.4766	-53.1006	-56.7627	-53.7109	-54.3213
16.2	-60.4248	-64.0869	-61.6455	-69.5801	-69.5801	-65.918	-70.1904	-57.9834	-63.4766	-53.1006	-48.8281	-50.6592	-53.1006
16.3	-67.749	-73.8525	-57.9834	-65.918	-67.749	-70.1904	-59.2041	-56.7627	-61.0352	-53.7109	-52.4902	-52.4902	-50.6592
16.4	-68.3594	-71.4111	-60.4248	-72.0215	-70.1904	-57.9834	-69.5801	-57.9834	-64.6973	-54.3213	-44.5557	-46.9971	-52.4902
16.5	-72.6318	-69.5801	-64.0869	-72.6318	-73.2422	-65.3076	-70.1904	-59.8145	-70.1904	-61.6455	-49.4385	-49.4385	-51.2695
16.6	-62.8662	-72.6318	-64.6973	-70.1904	-67.749	-70.1904	-67.1387	-61.0352	-54.3213	-56.1523	-50.6592	-47.6074	-57.9834
16.7	-68.3594	-69.5801	-63.4766	-71.4111	-68.9697	-66.5283	-71.4111	-63.4766	-68.9697	-54.3213	-50.6592	-39.6729	-49.4385
16.8	-70.8008	-66.5283	-61.0352	-73.8525	-68.3594	-68.3594	-72.0215	-64.0869	-59.8145	-57.9834	-54.9316	-52.4902	-50.6592
16.9	-70.8008	-67.1387	-65.3076	-70.8008	-73.8525	-67.749	-67.749	-59.2041	-68.9697	-61.6455	-51.2695	-60.4248	-50.6592
17	-74.4629	-69.5801	-70.1904	-65.918	-68.3594	-61.6455	-62.2559	-57.373	-63.4766	-57.9834	-53.1006	-54.3213	-53.1006
17.1	-71.4111	-66.5283	-59.2041	-67.749	-62.2559	-72.0215	-65.918	-62.8662	-67.1387	-56.7627	-50.0488	-51.2695	-53.1006
17.2	-67.749	-67.749	-67.749	-75.0732	-72.0215	-66.5283	-65.918	-61.6455	-67.1387	-57.373	-43.9453	-46.3867	-53.1006
17.3	-71.4111	-69.5801	-63.4766	-68.3594	-72.6318	-69.5801	-63.4766	-61.6455	-66.5283	-55.542	-52.4902	-53.7109	-47.6074
17.4	-75.6836	-64.6973	-61.0352	-75.0732	-67.749	-64.6973	-67.1387	-62.2559	-67.1387	-56.7627	-54.3213	-53.7109	-52.4902
17.5	-70.1904	-72.6318	-66.5283	-71.4111	-65.918	-65.918	-61.6455	-61.0352	-56.1523	-51.2695	-50.6592	-50.6592	-53.1006
17.6	-67.1387	-64.0869	-66.5283	-67.1387	-70.1904	-70.1904	-67.749	-65.3076	-67.1387	-58.5938	-45.7764	-48.2178	-53.7109
17.7	-73.8525	-69.5801	-64.6973	-67.1387	-70.1904	-62.2559	-59.2041	-59.8145	-67.749	-59.8145	-52.4902	-51.2695	-54.9316
17.8	-70.1904	-66.5283	-64.0869	-75.0732	-66.5283	-71.4111	-62.2559	-69.5801	-61.0352	-54.9316	-56.1523	-56.7627	-51.2695
17.9	-70.1904	-68.9697	-62.2559	-70.1904	-64.6973	-66.5283	-63.4766	-61.0352	-60.4248	-59.8145	-49.4385	-53.1006	-50.0488
18	-68.3594	-64.0869	-61.0352	-69.5801	-68.3594	-67.1387	-62.8662	-64.0869	-64.0869	-56.7627	-50.0488	-43.9453	-56.1523
18.1	-65.3076	-70.8008	-56.7627	-69.5801	-70.8008	-63.4766	-63.4766	-67.1387	-65.3076	-58.5938	-45.7764	-56.7627	-50.0488
18.2	-70.1904	-68.9697	-62.8662	-64.6973	-61.6455	-72.0215	-61.0352	-67.749	-61.0352	-54.9316	-46.9971	-51.2695	-54.9316
18.3	-73.8525	-77.5146	-65.918	-71.4111	-64.0869	-64.6973	-69.5801	-56.1523	-60.4248	-53.7109	-50.0488	-57.9834	-53.1006
18.4	-59.8145	-75.6836	-59.8145	-68.3594	-67.1387	-64.0869	-65.3076	-59.8145	-63.4766	-59.8145	-45.7764	-51.2695	-52.4902
18.5	-74.4629	-68.3594	-59.2041	-67.749	-65.3076	-64.0869	-63.4766	-62.8662	-64.0869	-50.6592	-50.0488	-51.2695	-51.8799
18.6	-73.2422	-69.5801	-61.6455	-68.9697	-63.4766	-70.1904	-65.918	-62.2559	-62.8662	-53.7109	-48.2178	-51.8799	-49.4385
18.7	-66.5283	-69.5801	-62.2559	-65.3076	-70.1904	-67.749	-62.2559	-60.4248	-53.1006	-57.9834	-51.2695	-50.0488	-51.8799
18.8	-70.8008	-65.3076	-59.2041	-73.2422	-69.5801	-65.918	-66.5283	-57.373	-59.2041	-60.4248	-50.6592	-53.7109	-51.2695
18.9	-62.8662	-74.4629	-61.0352	-64.0869	-61.6455	-65.918	-62.8662	-61.6455	-52.4902	-61.0352	-53.7109	-50.6592	-45.166
19	-75.6836	-72.0215	-68.9697	-69.5801	-68.9697	-70.8008	-65.918	-60.4248	-58.5938	-57.9834	-54.9316	-53.1006	-48.8281
19.1	-73.8525	-66.5283	-68.9697	-67.1387	-68.9697	-63.4766	-63.4766	-62.8662	-59.8145	-58.5938	-51.2695	-50.0488	-56.1523
19.2	-66.5283	-69.5801	-63.4766	-64.0869	-70.8008	-75.0732	-68.9697	-64.6973	-59.8145	-59.8145	-54.3213	-52.4902	-51.8799
19.3	-69.5801	-60.4248	-64.0869	-69.5801	-67.749	-74.4629	-65.918	-67.1387	-57.373	-61.0352	-51.8799	-57.9834	-56.7627
19.4	-68.9697	-72.0215	-65.918	-67.749	-63.4766	-66.5283	-65.918	-64.0869	-62.8662	-54.3213	-53.7109	-48.2178	-48.8281
19.5	-67.1387	-71.4111	-63.4766	-70.8008	-72.0215	-62.2559	-68.9697	-56.1523	-56.7627	-62.2559	-50.6592	-51.2695	-56.1523
19.6	-70.1904	-70.1904	-58.5938	-68.3594	-66.5283	-62.8662	-63.4766	-65.918	-53.1006	-56.7627	-54.9316	-48.8281	-52.4902
19.7	-68.3594	-68.3594	-65.3076	-69.5801	-65.918	-75.6836	-68.9697	-59.2041	-64.0869	-57.9834	-51.8799	-51.8799	-49.4385
19.8	-71.4111	-74.4629	-68.9697	-75.6836	-68.9697	-70.1904	-67.1387	-60.4248	-55.542	-57.9834	-59.8145	-56.1523	-53.1006
19.9	-65.3076	-68.9697	-57.9834	-65.918	-72.6318	-73.8525	-64.6973	-58.5938	-62.8662	-57.9834	-46.9971	-54.3213	-56.1523
20	-68.9697	-65.3076	-62.8662	-68.3594	-75.0732	-69.5801	-66.5283	-64.6973	-54.9316	-56.1523	-46.3867	-49.4385	-51.8799
20.1	-75.0732	-68.9697	-58.5938	-70.8008	-65.3076	-67.1387	-64.0869	-57.9834	-56.1523	-61.6455	-53.7109	-48.2178	-56.1523
20.2	-72.6318	-70.8008	-68.9697	-70.1904	-64.6973	-68.3594	-65.3076	-67.1387	-64.6973	-57.9834	-51.2695	-54.3213	-54.9316
20.3	-77.5146	-71.4111	-60.4248	-75.0732	-73.2422	-65.3076	-68.9697	-56.7627	-58.5938	-64.0869	-53.7109	-51.8799	-53.1006
20.4	-69.5801	-68.3594	-67.1387	-70.1904	-68.3594	-67.749	-65.3076	-66.5283	-61.0352	-59.2041	-51.8799	-51.8799	-47.6074
20.5	-72.6318	-65.918	-67.1387	-67.1387	-65.918	-68.3594	-67.1387	-65.918	-59.2041	-56.7627	-50.0488	-48.2178	-53.1006
20.6	-67.749	-65.918	-65.3076	-69.5801	-73.2422	-65.918	-64.6973	-67.1387	-57.9834	-59.2041	-56.1523	-49.4385	-50.0488
20.7	-82.3975	-68.9697	-66.5283	-69.5801	-77.5146	-70.8008	-61.0352	-60.4248	-55.542	-63.4766	-52.4902	-51.8799	-53.7109
20.8	-72.0215	-70.8008	-62.2559	-73.8525	-73.8525	-70.1904	-63.4766	-55.542	-57.9834	-64.0869	-48.2178	-45.166	-53.7109
20.9	-70.8008	-70.1904	-68.9697	-64.6973	-61.0352	-70.1904	-63.4766	-62.2559	-59.8145	-59.2041	-48.2178	-53.1006	-45.166
21	-67.1387	-63.4766	-64.6973	-68.9697	-71.4111	-71.4111	-59.8145	-65.3076	-59.2041	-53.1006	-51.8799	-55.542	-48.2178
21.1	-75.6836	-64.6973	-61.0352	-68.9697	-67.1387	-68.3594	-57.373	-67.1387	-58.5938	-55.542	-47.6074	-55.542	-53.1006
21.2	-72.6318	-74.4629	-62.2559	-67.749	-68.9697	-66.5283	-74.4629	-68.3594	-56.1523	-55.542	-51.2695	-51.2695	-46.9971
21.3	-70.8008	-68.3594	-63.4766	-66.5283	-67.1387	-65.3076	-62.8662	-67.1387	-59.2041	-59.8145	-56.7627	-50.0488	-51.8799
21.4	-73.2422	-71.4111	-67.749	-69.5801	-66.5283	-65.3076	-68.9697	-61.0352	-57.9834	-54.9316	-48.8281	-57.373	-50.0488
21.5	-76.2939	-75.6836	-70.8008	-66.5283	-66.5283	-65.918	-61.0352	-67.1387	-62.8662	-61.0352	-54.3213	-56.1523	-54.3213
21.6	-71.4111	-68.3594	-66.5283	-66.5283	-65.918	-63.4766	-64.0869	-63.4766	-61.6455	-57.373	-50.6592	-55.542	-51.2695
21.7	-60.4248	-68.3594	-64.6973	-68.3594	-67.749	-72.0215	-67.749	-65.918	-65.3076	-62.8662	-48.2178	-54.9316	-55.542
21.8	-71.4111	-66.5283	-66.5283	-65.918	-72.0215	-69.5801	-70.8008	-65.3076	-57.9834	-49.4385	-48.8281	-56.1523	-51.8799
21.9	-72.0215	-70.8008	-63.4766	-68.3594	-70.8008	-67.749	-65.918	-65.3076	-62.8662	-54.3213	-56.1523	-54.3213	-47.6074
22	-69.5801	-72.6318	-68.3594	-72.6318	-66.5283	-68.3594	-65.918	-63.4766	-62.8662	-54.3213	-57.9834	-50.6592	-54.9316
22.1	-68.9697	-73.2422	-62.8662	-68.3594	-67.1387	-70.8008	-65.918	-67.1387	-62.8662	-47.6074	-53.1006	-54.9316	-52.4902
22.2	-70.1904	-69.5801	-64.6973	-64.0869	-62.2559	-67.1387	-72.0215	-67.749	-62.8662	-54.3213	-60.4248	-52.4902	-53.1006
22.3	-72.6318	-76.2939	-64.0869	-68.3594	-63.4766	-66.5283	-68.3594	-60.4248	-61.0352	-53.1006	-56.1523	-56.7627	-57.373
22.4	-72.6318	-70.1904	-73.2422	-73.2422	-67.1387	-68.3594	-66.5283	-67.1387	-58.5938	-51.2695	-53.1006	-57.9834	-54.9316
22.5	-67.1387	-68.3594	-67.1387	-67.749	-69.5801	-67.1387	-60.4248	-68.3594	-62.2559	-54.9316	-56.1523	-53.7109	-54.3213
22.6	-79.9561	-73.2422	-59.2041	-75.0732	-71.4111	-61.0352	-71.4111	-63.4766	-56.7627	-59.8145	-43.335	-50.6592	-54.9316
22.7	-75.6836	-69.5801	-68.3594	-64.0869	-71.4111	-57.9834	-62.8662	-63.4766	-61.0352	-57.9834	-51.8799	-54.9316	-46.3867
22.8	-68.3594	-73.2422	-66.5283	-65.918	-64.0869	-68.3594	-62.2559	-62.8662	-62.2559	-59.8145	-55.542	-53.1006	-48.8281
22.9	-64.6973	-67.749	-68.9697	-62.8662	-62.8662	-67.749	-61.6455	-63.4766	-58.5938	-62.2559	-53.1006	-49.4385	-50.0488
23	-72.0215	-75.0732	-69.5801	-78.125	-61.6455	-67.749	-61.6455	-61.0352	-56.1523	-61.0352	-56.1523	-53.1006	-48.8281
23.1	-71.4111	-68.3594	-59.2041	-68.9697	-72.6318	-70.1904	-64.6973	-67.749	-63.4766	-54.3213	-45.7764	-52.4902	-51.2695
23.2	-75.0732	-69.5801	-65.3076	-71.4111	-70.1904	-65.3076	-65.918	-67.1387	-55.542	-65.918	-54.9316	-55.542	-48.2178
23.3	-70.1904	-68.3594	-64.6973	-66.5283	-73.2422	-64.6973	-67.1387	-57.373	-57.9834	-60.4248	-48.8281	-53.1006	-48.2178
23.4	-73.2422	-71.4111	-63.4766	-69.5801	-70.1904	-64.0869	-65.918	-72.6318	-60.4248	-54.9316	-50.0488	-49.4385	-50.6592
23.5	-69.5801	-65.918	-62.8662	-67.749	-62.2559	-68.9697	-59.8145	-67.749	-64.0869	-53.1006	-53.7109	-54.3213	-51.8799
23.6	-67.1387	-78.7354	-59.2041	-68.3594	-65.918	-61.6455	-68.9697	-65.3076	-65.918	-61.6455	-52.4902	-48.2178	-50.0488
23.7	-65.918	-68.9697	-64.0869	-72.6318	-67.1387	-64.6973	-65.3076	-70.8008	-57.9834	-54.9316	-45.7764	-51.8799	-57.373
23.8	-72.6318	-72.0215	-67.749	-68.9697	-72.6318	-69.5801	-62.2559	-66.5283	-57.9834	-65.918	-46.3867	-49.4385	-50.0488
23.9	-64.0869	-68.3594	-70.8008	-68.3594	-66.5283	-68.3594	-60.4248	-69.5801	-65.3076	-57.373	-46.3867	-48.2178	-53.7109
24	-73.2422	-75.6836	-61.0352	-70.1904	-74.4629	-70.8008	-60.4248	-62.8662	-65.918	-63.4766	-53.1006	-53.7109	-56.1523
24.1	-72.6318	-74.4629	-75.0732	-67.1387	-65.918	-65.3076	-59.2041	-62.8662	-67.749	-57.373	-53.1006	-54.3213	-53.7109
24.2	-67.749	-75.6836	-61.6455	-70.8008	-65.3076	-67.749	-70.1904	-59.2041	-62.8662	-56.1523	-54.3213	-51.2695	-52.4902
24.3	-67.749	-73.2422	-64.0869	-68.9697	-75.0732	-72.0215	-65.3076	-70.1904	-65.3076	-61.0352	-51.2695	-48.2178	-54.9316
24.4	-72.6318	-73.8525	-64.6973	-66.5283	-67.1387	-67.1387	-67.1387	-59.2041	-57.9834	-50.0488	-40.8936	-55.542	-54.9316
24.5	-72.6318	-67.749	-62.8662	-67.749	-70.8008	-67.749	-60.4248	-59.2041	-62.2559	-46.9971	-50.6592	-45.166	-54.3213
24.6	-69.5801	-67.1387	-68.9697	-67.749	-64.0869	-68.3594	-59.2041	-68.9697	-56.7627	-47.6074	-56.1523	-52.4902	-48.8281
24.7	-73.8525	-78.7354	-62.2559	-70.8008	-65.918	-68.3594	-62.8662	-65.918	-57.9834	-54.9316	-54.9316	-55.542	-47.6074
24.8	-75.6836	-75.0732	-68.3594	-68.3594	-65.3076	-73.2422	-64.0869	-61.6455	-65.3076	-53.1006	-51.8799	-53.7109	-48.8281
24.9	-66.5283	-76.2939	-65.3076	-70.8008	-65.918	-63.4766	-65.918	-59.8145	-61.0352	-58.5938	-56.7627	-56.7627	-50.0488
25	-65.918	-73.8525	-60.4248	-67.1387	-67.1387	-67.749	-67.749	-66.5283	-55.542	-54.9316	-54.9316	-55.542	-51.8799
25.1	-69.5801	-73.8525	-71.4111	-68.9697	-67.749	-64.6973	-63.4766	-60.4248	-57.373	-57.373	-48.2178	-51.2695	-49.4385
25.2	-73.8525	-75.6836	-61.6455	-67.749	-61.0352	-67.749	-64.6973	-57.9834	-62.2559	-50.6592	-54.3213	-57.9834	-46.9971
25.3	-72.0215	-70.1904	-64.0869	-69.5801	-65.3076	-64.0869	-66.5283	-63.4766	-62.8662	-55.542	-57.373	-53.7109	-50.6592
25.4	-74.4629	-69.5801	-70.1904	-65.3076	-65.918	-70.1904	-69.5801	-65.918	-60.4248	-58.5938	-57.373	-52.4902	-53.7109
25.5	-72.6318	-67.749	-61.0352	-66.5283	-64.6973	-71.4111	-70.1904	-65.3076	-66.5283	-57.373	-57.373	-49.4385	-47.6074
25.6	-72.0215	-71.4111	-67.1387	-66.5283	-73.2422	-61.0352	-63.4766	-66.5283	-61.0352	-54.3213	-50.0488	-53.1006	-47.6074
25.7	-79.3457	-67.749	-62.2559	-68.9697	-66.5283	-68.3594	-64.6973	-60.4248	-54.3213	-57.373	-46.9971	-50.0488	-50.0488
25.8	-70.8008	-76.2939	-71.4111	-66.5283	-65.3076	-64.0869	-72.0215	-62.2559	-59.8145	-58.5938	-52.4902	-45.7764	-48.8281
25.9	-73.2422	-72.6318	-62.2559	-70.1904	-63.4766	-67.749	-64.6973	-66.5283	-59.2041	-57.373	-52.4902	-54.9316	-51.8799
26	-70.8008	-72.0215	-68.9697	-68.9697	-64.0869	-66.5283	-67.1387	-60.4248	-57.373	-53.7109	-51.2695	-48.8281	-53.7109
26.1	-75.6836	-76.9043	-64.0869	-63.4766	-63.4766	-72.0215	-59.2041	-56.1523	-59.2041	-50.6592	-51.2695	-54.3213	-56.1523
26.2	-72.6318	-71.4111	-65.3076	-70.8008	-67.1387	-67.749	-66.5283	-61.6455	-61.6455	-57.373	-47.6074	-50.6592	-53.7109
26.3	-70.8008	-72.0215	-65.3076	-65.3076	-63.4766	-68.3594	-66.5283	-67.1387	-62.8662	-51.2695	-54.3213	-51.2695	-53.1006
26.4	-75.0732	-68.3594	-66.5283	-55.542	-66.5283	-65.3076	-65.918	-56.1523	-59.8145	-59.2041	-51.8799	-57.373	-50.0488
26.5	-74.4629	-74.4629	-63.4766	-66.5283	-68.3594	-73.2422	-61.6455	-58.5938	-54.3213	-57.373	-54.9316	-50.0488	-52.4902
26.6	-71.4111	-72.0215	-71.4111	-65.3076	-67.1387	-68.3594	-72.0215	-59.2041	-54.3213	-49.4385	-54.3213	-51.2695	-48.8281
26.7	-72.0215	-73.2422	-68.9697	-66.5283	-60.4248	-66.5283	-66.5283	-56.7627	-59.2041	-53.7109	-56.1523	-48.2178	-44.5557
26.8	-78.7354	-73.2422	-65.3076	-67.749	-67.1387	-73.2422	-59.2041	-56.1523	-57.373	-51.8799	-52.4902	-46.3867	-55.542
26.9	-65.918	-70.8008	-62.2559	-70.1904	-70.1904	-70.8008	-64.0869	-68.3594	-59.2041	-51.2695	-45.7764	-52.4902	-52.4902
27	-73.8525	-68.9697	-64.0869	-70.1904	-69.5801	-72.6318	-64.6973	-54.3213	-61.6455	-59.2041	-51.8799	-53.7109	-57.373
27.1	-72.6318	-73.8525	-60.4248	-61.0352	-79.9561	-70.8008	-56.1523	-62.2559	-59.8145	-55.542	-56.1523	-51.8799	-54.9316
27.2	-72.6318	-70.1904	-65.918	-65.3076	-65.918	-62.8662	-68.3594	-64.6973	-55.542	-50.6592	-48.2178	-46.9971	-55.542
27.3	-64.6973	-76.2939	-66.5283	-70.8008	-67.1387	-72.0215	-62.8662	-60.4248	-62.8662	-59.2041	-50.0488	-53.1006	-50.0488
27.4	-75.6836	-72.6318	-67.749	-64.6973	-68.3594	-64.6973	-68.3594	-65.918	-60.4248	-55.542	-48.2178	-46.9971	-46.9971
27.5	-70.1904	-68.9697	-65.3076	-71.4111	-68.3594	-64.6973	-59.2041	-57.373	-62.8662	-53.7109	-48.2178	-50.6592	-51.2695
27.6	-69.5801	-70.1904	-69.5801	-65.3076	-68.3594	-69.5801	-61.6455	-65.3076	-64.0869	-54.9316	-53.7109	-50.6592	-49.4385
27.7	-67.749	-75.6836	-69.5801	-60.4248	-68.3594	-65.918	-62.8662	-62.8662	-62.8662	-56.1523	-52.4902	-50.0488	-45.7764
27.8	-76.2939	-69.5801	-75.6836	-70.8008	-70.8008	-63.4766	-65.3076	-63.4766	-59.2041	-54.3213	-57.373	-48.8281	-52.4902
27.9	-70.8008	-83.0078	-72.6318	-70.8008	-64.0869	-63.4766	-66.5283	-63.4766	-58.5938	-56.1523	-56.1523	-50.0488	-50.0488
28	-65.918	-76.9043	-67.1387	-72.6318	-68.3594	-70.8008	-67.1387	-68.9697	-59.2041	-57.373	-57.9834	-48.2178	-46.3867
28.1	-65.918	-70.8008	-70.1904	-72.0215	-70.8008	-70.8008	-65.918	-62.8662	-59.2041	-51.2695	-48.8281	-56.1523	-53.1006
28.2	-69.5801	-67.749	-70.1904	-63.4766	-65.3076	-65.3076	-59.8145	-69.5801	-59.2041	-51.8799	-51.8799	-50.0488	-51.2695
28.3	-70.8008	-69.5801	-68.9697	-70.1904	-64.0869	-67.1387	-54.9316	-63.4766	-57.373	-56.7627	-54.9316	-53.7109	-46.3867
28.4	-64.0869	-76.2939	-64.0869	-64.0869	-66.5283	-68.9697	-63.4766	-67.1387	-62.2559	-59.2041	-53.7109	-50.0488	-53.7109
28.5	-72.0215	-76.9043	-62.8662	-68.9697	-66.5283	-67.749	-59.2041	-65.3076	-58.5938	-54.9316	-51.8799	-41.5039	-48.8281
28.6	-72.0215	-78.125	-68.3594	-68.9697	-63.4766	-70.8008	-69.5801	-64.6973	-54.3213	-56.1523	-53.7109	-51.2695	-49.4385
28.7	-74.4629	-67.749	-67.1387	-68.9697	-67.1387	-65.3076	-65.3076	-65.918	-56.1523	-54.9316	-60.4248	-55.542	-47.6074
28.8	-72.0215	-70.1904	-68.9697	-78.7354	-65.918	-66.5283	-61.6455	-71.4111	-55.542	-49.4385	-52.4902	-55.542	-51.8799
28.9	-66.5283	-73.8525	-72.0215	-67.1387	-73.2422	-67.1387	-68.3594	-62.2559	-55.542	-55.542	-51.2695	-50.6592	-54.3213
29	-73.2422	-66.5283	-68.9697	-64.0869	-59.8145	-68.3594	-65.3076	-67.1387	-63.4766	-57.9834	-56.7627	-51.2695	-49.4385
29.1	-68.3594	-70.8008	-68.3594	-66.5283	-68.3594	-69.5801	-66.5283	-65.3076	-62.8662	-53.7109	-56.7627	-51.2695	-43.9453
29.2	-67.749	-70.1904	-64.0869	-64.6973	-67.1387	-67.1387	-62.2559	-68.3594	-53.7109	-53.7109	-56.7627	-57.9834	-52.4902
29.3	-70.8008	-70.1904	-74.4629	-72.0215	-69.5801	-68.9697	-61.6455	-60.4248	-56.1523	-51.2695	-57.373	-52.4902	-49.4385
29.4	-68.3594	-73.2422	-70.1904	-73.2422	-65.3076	-68.9697	-61.6455	-68.3594	-59.2041	-54.9316	-58.5938	-45.166	-51.2695
29.5	-77.5146	-73.2422	-70.1904	-68.9697	-70.1904	-65.918	-64.6973	-65.3076	-54.9316	-57.9834	-55.542	-49.4385	-56.1523
29.6	-68.9697	-71.4111	-72.0215	-73.2422	-64.6973	-64.0869	-61.0352	-59.2041	-59.2041	-57.9834	-51.2695	-52.4902	-53.7109
29.7	-69.5801	-67.749	-64.6973	-65.3076	-67.1387	-69.5801	-63.4766	-61.6455	-51.2695	-50.6592	-54.9316	-58.5938	-46.9971
29.8	-71.4111	-68.9697	-69.5801	-67.1387	-63.4766	-68.9697	-62.2559	-64.6973	-55.542	-57.9834	-56.1523	-43.9453	-46.9971
29.9	-70.8008	-79.3457	-67.1387	-61.6455	-69.5801	-67.749	-57.9834	-64.0869	-58.5938	-58.5938	-57.9834	-50.0488	-49.4385
30	-68.9697	-74.4629	-65.918	-68.9697	-67.749	-70.1904	-59.8145	-62.2559	-56.1523	-57.373	-55.542	-46.3867	-53.7109
30.1	-78.125	-73.8525	-62.2559	-70.8008	-62.2559	-73.8525	-62.8662	-65.918	-61.6455	-55.542	-58.5938	-48.2178	-53.1006
30.2	-66.5283	-69.5801	-57.373	-68.3594	-73.2422	-67.1387	-65.918	-70.1904	-57.373	-53.7109	-57.373	-50.6592	-58.5938
30.3	-68.3594	-71.4111	-64.6973	-67.749	-67.749	-67.749	-63.4766	-70.1904	-56.1523	-57.9834	-54.9316	-58.5938	-48.2178
30.4	-69.5801	-73.2422	-62.8662	-67.1387	-66.5283	-69.5801	-59.2041	-64.6973	-64.6973	-53.7109	-54.9316	-46.3867	-61.0352
30.5	-71.4111	-71.4111	-60.4248	-66.5283	-73.2422	-66.5283	-57.9834	-70.8008	-59.8145	-50.0488	-50.0488	-52.4902	-50.6592
30.6	-69.5801	-70.1904	-57.9834	-65.3076	-68.9697	-70.8008	-61.0352	-68.3594	-57.9834	-56.1523	-58.5938	-55.542	-50.0488
30.7	-75.6836	-79.9561	-70.1904	-68.9697	-68.3594	-68.3594	-64.6973	-63.4766	-57.373	-57.373	-57.373	-50.6592	-52.4902
30.8	-67.1387	-75.6836	-64.6973	-67.1387	-63.4766	-62.2559	-59.2041	-65.918	-56.1523	-57.373	-54.9316	-51.8799	-49.4385
30.9	-69.5801	-70.1904	-61.0352	-62.8662	-66.5283	-67.749	-60.4248	-65.3076	-57.9834	-50.6592	-56.7627	-49.4385	-51.2695
31	-68.9697	-69.5801	-63.4766	-67.1387	-65.3076	-70.8008	-67.749	-64.6973	-59.8145	-61.0352	-53.1006	-47.6074	-59.2041
31.1	-69.5801	-77.5146	-64.6973	-66.5283	-68.3594	-67.749	-59.2041	-65.918	-62.2559	-60.4248	-60.4248	-52.4902	-54.9316
31.2	-68.3594	-76.9043	-59.8145	-64.0869	-63.4766	-66.5283	-62.2559	-63.4766	-53.1006	-51.8799	-50.6592	-48.8281	-45.166
31.3	-72.0215	-68.9697	-70.8008	-70.1904	-71.4111	-74.4629	-64.0869	-64.6973	-53.1006	-57.373	-56.1523	-44.5557	-53.1006
31.4	-69.5801	-72.6318	-63.4766	-72.0215	-69.5801	-73.2422	-65.918	-62.8662	-61.6455	-58.5938	-64.0869	-48.8281	-49.4385
31.5	-68.3594	-79.3457	-60.4248	-67.749	-62.8662	-78.125	-61.6455	-65.918	-59.8145	-54.9316	-57.373	-53.7109	-51.8799
31.6	-71.4111	-70.8008	-67.1387	-69.5801	-62.8662	-70.8008	-62.8662	-65.3076	-61.6455	-59.8145	-55.542	-45.166	-52.4902
31.7	-65.918	-75.0732	-76.9043	-72.0215	-64.0869	-68.3594	-63.4766	-64.6973	-57.9834	-60.4248	-48.2178	-56.1523	-50.0488
31.8	-73.8525	-68.3594	-64.0869	-67.749	-69.5801	-68.3594	-63.4766	-60.4248	-57.373	-54.3213	-58.5938	-58.5938	-50.6592
31.9	-69.5801	-75.0732	-66.5283	-73.8525	-71.4111	-71.4111	-65.3076	-65.918	-57.9834	-53.1006	-56.1523	-52.4902	-46.3867
32	-67.1387	-74.4629	-70.1904	-74.4629	-67.1387	-75.6836	-65.3076	-67.1387	-67.1387	-62.2559	-53.7109	-55.542	-53.1006
32.1	-69.5801	-77.5146	-67.1387	-68.9697	-65.918	-67.1387	-64.6973	-67.1387	-66.5283	-57.9834	-53.7109	-50.0488	-50.0488
32.2	-63.4766	-68.3594	-67.1387	-62.2559	-64.6973	-77.5146	-64.0869	-64.6973	-65.918	-57.9834	-56.7627	-52.4902	-53.1006
32.3	-73.2422	-76.9043	-60.4248	-63.4766	-68.3594	-65.918	-64.0869	-65.918	-59.2041	-59.2041	-50.6592	-51.2695	-54.3213
32.4	-69.5801	-68.3594	-62.2559	-70.8008	-74.4629	-65.918	-57.9834	-72.0215	-60.4248	-64.6973	-54.3213	-49.4385	-48.8281
32.5	-68.3594	-71.4111	-69.5801	-72.0215	-69.5801	-66.5283	-55.542	-62.8662	-57.9834	-61.6455	-52.4902	-50.0488	-52.4902
32.6	-68.3594	-73.2422	-61.6455	-75.0732	-65.3076	-65.918	-62.2559	-63.4766	-61.6455	-65.3076	-54.3213	-48.2178	-53.7109
32.7	-68.3594	-73.8525	-60.4248	-69.5801	-67.749	-68.9697	-65.3076	-65.3076	-64.0869	-55.542	-54.9316	-52.4902	-59.2041
32.8	-73.8525	-67.1387	-71.4111	-67.749	-67.1387	-75.0732	-61.6455	-65.3076	-59.8145	-61.0352	-66.5283	-49.4385	-51.8799
32.9	-69.5801	-79.9561	-61.6455	-72.0215	-66.5283	-64.0869	-63.4766	-65.3076	-57.373	-61.6455	-58.5938	-51.2695	-53.1006
33	-66.5283	-75.6836	-59.2041	-73.2422	-66.5283	-68.9697	-70.1904	-59.8145	-62.2559	-56.7627	-54.9316	-53.1006	-50.6592
33.1	-72.0215	-74.4629	-64.0869	-65.918	-62.8662	-65.918	-70.1904	-64.6973	-65.918	-61.6455	-57.373	-50.6592	-52.4902
33.2	-70.8008	-72.6318	-65.918	-70.1904	-72.0215	-68.9697	-67.1387	-73.8525	-60.4248	-54.3213	-53.7109	-48.8281	-51.2695
33.3	-67.1387	-78.7354	-66.5283	-68.3594	-70.1904	-70.1904	-62.2559	-68.3594	-66.5283	-59.8145	-62.8662	-44.5557	-56.7627
33.4	-65.918	-75.0732	-59.8145	-72.6318	-70.8008	-65.918	-67.749	-66.5283	-61.6455	-62.8662	-58.5938	-48.2178	-48.8281
33.5	-66.5283	-73.8525	-69.5801	-72.0215	-71.4111	-65.918	-64.6973	-67.749	-65.918	-58.5938	-49.4385	-48.8281	-51.8799
33.6	-73.2422	-70.8008	-72.0215	-75.6836	-68.9697	-70.8008	-67.749	-60.4248	-56.7627	-59.8145	-55.542	-50.0488	-47.6074
33.7	-68.3594	-62.2559	-64.6973	-67.749	-70.8008	-68.9697	-67.749	-62.8662	-60.4248	-54.9316	-54.3213	-46.3867	-52.4902
33.8	-72.6318	-72.6318	-70.1904	-70.1904	-68.9697	-68.3594	-62.2559	-70.8008	-62.2559	-59.8145	-56.1523	-46.3867	-48.8281
33.9	-71.4111	-74.4629	-62.2559	-68.3594	-67.749	-61.0352	-64.6973	-65.3076	-59.2041	-54.3213	-59.2041	-53.7109	-57.373
34	-72.6318	-73.2422	-69.5801	-68.9697	-64.6973	-79.3457	-67.749	-65.3076	-61.6455	-59.2041	-52.4902	-53.7109	-57.9834
34.1	-66.5283	-73.8525	-64.6973	-69.5801	-63.4766	-75.0732	-64.0869	-71.4111	-61.0352	-53.1006	-57.373	-51.8799	-52.4902
34.2	-67.1387	-68.9697	-63.4766	-66.5283	-70.1904	-66.5283	-66.5283	-64.6973	-66.5283	-56.7627	-59.2041	-50.0488	-51.8799
34.3	-68.9697	-72.0215	-63.4766	-72.6318	-68.9697	-70.8008	-70.8008	-65.3076	-61.0352	-61.6455	-56.1523	-49.4385	-50.6592
34.4	-65.918	-70.8008	-61.6455	-69.5801	-65.3076	-72.6318	-61.0352	-61.0352	-67.1387	-51.2695	-55.542	-51.8799	-48.8281
34.5	-73.2422	-82.3975	-59.8145	-67.1387	-76.9043	-70.1904	-62.2559	-66.5283	-58.5938	-60.4248	-51.8799	-49.4385	-51.8799
34.6	-65.918	-80.5664	-61.6455	-72.0215	-71.4111	-68.9697	-67.749	-66.5283	-55.542	-62.2559	-54.3213	-51.2695	-53.7109
34.7	-66.5283	-75.0732	-61.6455	-72.0215	-67.1387	-69.5801	-63.4766	-62.2559	-59.2041	-57.373	-53.1006	-45.166	-56.1523
34.8	-65.3076	-74.4629	-62.2559	-70.1904	-65.918	-68.3594	-64.0869	-61.0352	-61.0352	-60.4248	-52.4902	-48.8281	-44.5557
34.9	-71.4111	-73.8525	-61.0352	-69.5801	-67.749	-69.5801	-54.3213	-64.6973	-53.7109	-61.0352	-51.2695	-58.5938	-46.9971
35	-66.5283	-78.125	-63.4766	-68.9697	-67.749	-68.3594	-58.5938	-64.0869	-61.6455	-57.373	-51.8799	-45.7764	-54.9316
35.1	-67.749	-73.2422	-62.2559	-67.749	-70.1904	-63.4766	-67.749	-65.3076	-61.6455	-56.7627	-52.4902	-46.9971	-47.6074
35.2	-70.1904	-77.5146	-61.0352	-67.749	-70.1904	-67.749	-61.0352	-63.4766	-62.2559	-57.373	-51.8799	-42.1143	-52.4902
35.3	-69.5801	-67.1387	-67.749	-69.5801	-68.9697	-67.749	-64.6973	-63.4766	-60.4248	-54.3213	-50.6592	-50.0488	-47.6074
35.4	-70.8008	-73.2422	-61.0352	-70.8008	-66.5283	-77.5146	-62.2559	-63.4766	-55.542	-59.8145	-56.7627	-51.2695	-46.9971
35.5	-73.2422	-73.8525	-61.0352	-62.2559	-73.8525	-70.1904	-61.0352	-65.918	-56.1523	-51.2695	-52.4902	-54.9316	-44.5557
35.6	-72.0215	-70.1904	-62.2559	-68.9697	-69.5801	-67.749	-68.9697	-66.5283	-56.1523	-65.3076	-55.542	-54.9316	-48.2178
35.7	-66.5283	-73.8525	-59.2041	-66.5283	-69.5801	-66.5283	-62.8662	-67.749	-60.4248	-54.9316	-54.9316	-46.3867	-47.6074
35.8	-67.749	-75.6836	-61.0352	-75.0732	-67.1387	-62.2559	-57.373	-62.8662	-58.5938	-57.9834	-59.2041	-49.4385	-50.0488
35.9	-68.9697	-72.6318	-68.3594	-68.3594	-73.2422	-62.2559	-64.0869	-65.3076	-61.6455	-55.542	-57.9834	-48.8281	-47.6074
36	-67.749	-72.0215	-53.1006	-68.9697	-75.6836	-67.1387	-65.3076	-64.6973	-55.542	-53.1006	-53.1006	-48.8281	-49.4385
36.1	-75.0732	-75.0732	-65.3076	-78.125	-71.4111	-64.6973	-66.5283	-65.3076	-62.2559	-56.7627	-51.8799	-48.8281	-47.6074
36.2	-66.5283	-77.5146	-64.6973	-72.0215	-65.3076	-69.5801	-68.9697	-65.918	-68.3594	-57.9834	-51.8799	-54.9316	-46.3867
36.3	-71.4111	-76.9043	-68.3594	-68.3594	-68.3594	-67.749	-67.749	-59.8145	-59.2041	-54.9316	-53.1006	-53.7109	-56.1523
36.4	-70.8008	-80.5664	-68.3594	-70.1904	-70.1904	-72.6318	-67.1387	-71.4111	-61.6455	-55.542	-54.3213	-53.7109	-49.4385
36.5	-64.0869	-72.6318	-65.3076	-74.4629	-73.2422	-68.3594	-59.8145	-68.3594	-56.1523	-53.1006	-56.7627	-48.8281	-53.1006
36.6	-61.0352	-71.4111	-64.6973	-67.749	-69.5801	-67.1387	-67.1387	-63.4766	-63.4766	-58.5938	-52.4902	-49.4385	-53.1006
36.7	-68.9697	-72.0215	-61.6455	-63.4766	-65.3076	-64.6973	-60.4248	-67.749	-63.4766	-64.0869	-56.7627	-51.8799	-49.4385
36.8	-69.5801	-64.0869	-66.5283	-71.4111	-66.5283	-65.3076	-64.6973	-62.2559	-67.1387	-59.2041	-48.2178	-49.4385	-46.9971
36.9	-69.5801	-73.2422	-63.4766	-70.1904	-70.1904	-69.5801	-67.1387	-63.4766	-56.7627	-56.7627	-59.2041	-53.1006	-50.6592
37	-70.1904	-78.7354	-57.9834	-72.6318	-67.1387	-71.4111	-62.8662	-60.4248	-59.8145	-58.5938	-53.1006	-54.3213	-50.6592
37.1	-65.3076	-71.4111	-62.2559	-71.4111	-67.1387	-63.4766	-62.8662	-62.2559	-60.4248	-56.7627	-61.6455	-53.7109	-50.0488
37.2	-73.2422	-79.9561	-67.1387	-70.1904	-67.1387	-64.6973	-71.4111	-58.5938	-63.4766	-55.542	-52.4902	-48.8281	-53.1006
37.3	-64.6973	-73.2422	-71.4111	-68.3594	-66.5283	-73.2422	-68.9697	-65.3076	-59.8145	-57.373	-55.542	-49.4385	-52.4902
37.4	-67.1387	-67.749	-56.7627	-76.2939	-71.4111	-62.2559	-62.8662	-57.9834	-61.0352	-61.0352	-48.8281	-51.8799	-46.3867
37.5	-62.8662	-75.6836	-69.5801	-75.0732	-65.3076	-73.2422	-64.0869	-68.9697	-62.8662	-63.4766	-51.2695	-52.4902	-55.542
37.6	-73.2422	-72.6318	-63.4766	-69.5801	-69.5801	-67.1387	-64.0869	-64.0869	-59.2041	-55.542	-48.8281	-55.542	-50.0488
37.7	-66.5283	-76.9043	-65.918	-75.6836	-70.1904	-73.8525	-61.6455	-56.7627	-67.749	-51.2695	-49.4385	-53.7109	-51.2695
37.8	-70.8008	-76.2939	-65.918	-68.3594	-75.0732	-65.918	-67.1387	-62.2559	-67.749	-61.6455	-48.8281	-56.1523	-48.8281
37.9	-62.2559	-70.8008	-68.9697	-75.6836	-72.6318	-68.9697	-57.373	-60.4248	-54.9316	-58.5938	-52.4902	-51.2695	-46.9971
38	-66.5283	-72.6318	-60.4248	-68.9697	-72.0215	-65.918	-67.749	-64.0869	-65.918	-57.373	-61.0352	-45.7764	-43.9453
38.1	-70.1904	-70.8008	-72.6318	-70.1904	-69.5801	-68.9697	-61.6455	-61.0352	-59.8145	-53.7109	-53.7109	-41.5039	-54.3213
38.2	-74.4629	-69.5801	-64.0869	-70.1904	-70.8008	-65.3076	-71.4111	-64.0869	-65.3076	-52.4902	-54.3213	-56.7627	-53.7109
38.3	-74.4629	-70.1904	-67.749	-64.0869	-70.8008	-65.918	-67.1387	-69.5801	-58.5938	-57.373	-57.9834	-50.0488	-50.0488
38.4	-62.8662	-70.8008	-62.2559	-73.8525	-66.5283	-66.5283	-65.918	-66.5283	-61.0352	-54.3213	-54.9316	-55.542	-52.4902
38.5	-71.4111	-74.4629	-68.3594	-68.9697	-64.0869	-67.1387	-61.0352	-59.2041	-60.4248	-52.4902	-51.2695	-53.1006	-53.7109
38.6	-70.8008	-74.4629	-62.2559	-73.8525	-70.8008	-72.6318	-66.5283	-60.4248	-64.0869	-51.2695	-45.7764	-50.6592	-53.1006
38.7	-69.5801	-75.0732	-63.4766	-70.8008	-72.6318	-65.3076	-65.918	-65.918	-60.4248	-54.3213	-53.1006	-50.0488	-53.1006
38.8	-64.6973	-66.5283	-60.4248	-68.3594	-68.9697	-65.3076	-63.4766	-63.4766	-59.2041	-59.2041	-50.0488	-49.4385	-53.1006
38.9	-71.4111	-67.749	-65.918	-67.749	-74.4629	-69.5801	-70.1904	-67.1387	-57.373	-58.5938	-51.8799	-54.3213	-51.2695
39	-68.9697	-71.4111	-67.749	-72.6318	-72.6318	-77.5146	-68.9697	-66.5283	-61.0352	-57.373	-46.3867	-50.0488	-45.166
39.1	-70.1904	-78.7354	-62.8662	-70.8008	-72.6318	-67.1387	-67.1387	-65.918	-63.4766	-54.3213	-48.8281	-56.1523	-46.9971
39.2	-72.6318	-74.4629	-56.1523	-62.8662	-63.4766	-71.4111	-65.918	-64.0869	-67.1387	-64.0869	-46.9971	-48.8281	-52.4902
39.3	-68.9697	-67.749	-64.0869	-70.1904	-77.5146	-67.749	-65.918	-64.6973	-61.0352	-60.4248	-49.4385	-50.6592	-53.1006
39.4	-61.6455	-65.3076	-61.6455	-66.5283	-70.1904	-70.1904	-72.0215	-66.5283	-57.9834	-59.8145	-49.4385	-50.6592	-51.8799
39.5	-73.8525	-74.4629	-66.5283	-61.0352	-70.8008	-70.1904	-62.8662	-66.5283	-60.4248	-55.542	-49.4385	-54.3213	-49.4385
39.6	-68.3594	-78.125	-65.918	-70.8008	-75.0732	-72.6318	-64.0869	-66.5283	-62.8662	-59.2041	-48.8281	-51.8799	-46.9971
39.7	-76.2939	-73.2422	-68.3594	-68.3594	-71.4111	-65.3076	-62.8662	-64.0869	-62.2559	-61.0352	-46.9971	-55.542	-49.4385
39.8	-69.5801	-73.2422	-69.5801	-68.9697	-68.3594	-65.918	-56.7627	-67.749	-54.9316	-56.1523	-50.6592	-46.3867	-54.9316
39.9	-65.918	-70.1904	-66.5283	-62.8662	-75.6836	-71.4111	-72.6318	-62.8662	-61.0352	-57.373	-54.3213	-53.1006	-51.8799
40	-62.2559	-81.1768	-62.8662	-66.5283	-71.4111	-67.1387	-68.3594	-62.8662	-60.4248	-57.373	-49.4385	-45.7764	-54.9316
40.1	-68.9697	-73.2422	-65.3076	-67.1387	-69.5801	-63.4766	-64.6973	-64.0869	-60.4248	-59.8145	-50.6592	-56.7627	-57.9834
40.2	-68.9697	-76.9043	-70.1904	-67.749	-69.5801	-67.1387	-67.1387	-63.4766	-57.9834	-57.373	-46.9971	-52.4902	-43.9453
40.3	-71.4111	-72.0215	-67.1387	-65.918	-68.9697	-63.4766	-63.4766	-64.6973	-62.2559	-56.1523	-50.6592	-49.4385	-50.0488
40.4	-68.3594	-80.5664	-64.6973	-65.3076	-70.8008	-60.4248	-72.6318	-63.4766	-53.1006	-56.1523	-57.9834	-52.4902	-53.1006
40.5	-68.9697	-73.2422	-62.8662	-66.5283	-69.5801	-69.5801	-67.1387	-62.8662	-55.542	-54.9316	-56.1523	-56.7627	-47.6074
40.6	-71.4111	-78.7354	-62.2559	-65.3076	-70.8008	-67.749	-62.8662	-65.918	-58.5938	-59.8145	-46.3867	-50.0488	-53.7109
40.7	-66.5283	-75.0732	-64.6973	-70.1904	-73.2422	-59.2041	-61.6455	-61.0352	-62.8662	-61.6455	-56.1523	-50.6592	-45.7764
40.8	-78.7354	-71.4111	-62.8662	-63.4766	-67.749	-65.3076	-59.8145	-65.918	-61.0352	-61.6455	-52.4902	-50.6592	-55.542
40.9	-67.749	-68.3594	-68.3594	-64.0869	-65.918	-67.1387	-62.8662	-64.6973	-59.2041	-55.542	-54.3213	-46.9971	-53.7109
41	-72.0215	-69.5801	-61.0352	-65.3076	-64.6973	-65.918	-69.5801	-61.6455	-59.8145	-62.2559	-54.3213	-57.373	-51.2695
41.1	-73.2422	-79.3457	-67.1387	-61.6455	-69.5801	-64.0869	-68.9697	-67.1387	-61.0352	-58.5938	-50.6592	-50.6592	-47.6074
41.2	-71.4111	-80.5664	-64.6973	-65.918	-71.4111	-67.1387	-67.1387	-61.6455	-62.2559	-54.9316	-50.6592	-46.9971	-53.7109
41.3	-64.0869	-81.1768	-67.749	-68.3594	-70.1904	-69.5801	-65.3076	-67.749	-54.3213	-54.9316	-53.7109	-50.6592	-58.5938
41.4	-68.9697	-79.3457	-53.1006	-62.8662	-69.5801	-65.3076	-61.6455	-62.8662	-56.7627	-49.4385	-50.0488	-50.0488	-48.2178
41.5	-75.0732	-74.4629	-65.3076	-72.6318	-66.5283	-63.4766	-64.6973	-65.3076	-61.0352	-51.2695	-43.9453	-49.4385	-47.6074
41.6	-68.9697	-76.2939	-62.8662	-70.8008	-70.8008	-71.4111	-69.5801	-66.5283	-56.1523	-62.2559	-56.7627	-44.5557	-51.8799
41.7	-65.918	-81.7871	-62.8662	-70.1904	-72.0215	-64.6973	-67.1387	-66.5283	-55.542	-59.8145	-48.8281	-47.6074	-46.3867
41.8	-73.2422	-76.9043	-64.0869	-70.8008	-74.4629	-65.3076	-64.0869	-62.2559	-57.373	-52.4902	-46.9971	-40.2832	-53.1006
41.9	-64.6973	-73.2422	-65.918	-67.1387	-67.1387	-66.5283	-61.0352	-61.0352	-62.8662	-56.7627	-55.542	-51.8799	-46.9971
42	-72.6318	-73.8525	-61.0352	-66.5283	-66.5283	-65.3076	-70.1904	-67.1387	-61.6455	-56.7627	-44.5557	-48.2178	-53.7109
42.1	-77.5146	-64.0869	-64.6973	-67.1387	-65.3076	-68.3594	-64.6973	-63.4766	-59.8145	-60.4248	-53.1006	-50.6592	-51.8799
42.2	-71.4111	-73.2422	-65.3076	-68.3594	-64.6973	-68.9697	-71.4111	-67.1387	-65.918	-54.9316	-45.7764	-51.8799	-57.9834
42.3	-73.8525	-74.4629	-69.5801	-70.1904	-65.918	-68.3594	-67.1387	-65.3076	-64.6973	-56.1523	-50.6592	-50.6592	-51.8799
42.4	-68.3594	-77.5146	-73.8525	-70.1904	-75.6836	-68.3594	-68.9697	-58.5938	-72.6318	-53.7109	-48.2178	-51.2695	-49.4385
42.5	-67.749	-76.9043	-61.6455	-65.918	-62.8662	-66.5283	-67.749	-61.6455	-63.4766	-53.1006	-53.1006	-55.542	-45.166
42.6	-70.1904	-71.4111	-67.749	-67.1387	-65.918	-64.6973	-61.0352	-66.5283	-55.542	-55.542	-53.1006	-48.2178	-51.8799
42.7	-75.6836	-69.5801	-68.3594	-64.6973	-68.9697	-67.749	-65.918	-60.4248	-64.6973	-58.5938	-55.542	-50.0488	-50.6592
42.8	-76.2939	-76.2939	-56.7627	-70.8008	-69.5801	-70.1904	-64.6973	-62.2559	-56.1523	-53.1006	-50.0488	-52.4902	-52.4902
42.9	-72.6318	-75.6836	-64.0869	-66.5283	-64.6973	-67.1387	-61.6455	-64.6973	-56.1523	-54.3213	-52.4902	-47.6074	-53.7109
43	-75.0732	-76.9043	-68.3594	-67.1387	-67.749	-67.1387	-60.4248	-59.8145	-57.373	-58.5938	-51.2695	-45.7764	-45.166
43.1	-74.4629	-69.5801	-68.3594	-75.0732	-69.5801	-63.4766	-67.1387	-65.3076	-61.0352	-52.4902	-50.0488	-45.166	-57.373
43.2	-67.1387	-71.4111	-67.1387	-64.6973	-66.5283	-65.3076	-62.8662	-67.749	-67.749	-61.0352	-51.8799	-51.2695	-48.8281
43.3	-76.2939	-69.5801	-60.4248	-74.4629	-73.2422	-68.9697	-58.5938	-64.0869	-57.9834	-57.9834	-52.4902	-56.1523	-50.0488
43.4	-72.6318	-75.0732	-63.4766	-67.749	-67.1387	-68.3594	-58.5938	-61.0352	-53.1006	-64.6973	-53.1006	-50.0488	-51.2695
43.5	-70.1904	-75.6836	-62.8662	-64.6973	-66.5283	-63.4766	-61.0352	-64.6973	-63.4766	-59.2041	-53.7109	-51.2695	-51.2695
43.6	-73.2422	-72.6318	-65.3076	-70.8008	-62.2559	-68.9697	-68.3594	-59.8145	-61.0352	-61.0352	-51.8799	-46.3867	-50.0488
43.7	-74.4629	-69.5801	-64.0869	-65.918	-63.4766	-65.918	-64.0869	-62.8662	-57.9834	-57.373	-48.8281	-56.1523	-55.542
43.8	-78.125	-70.8008	-67.1387	-64.6973	-67.749	-66.5283	-61.6455	-65.3076	-62.2559	-58.5938	-48.2178	-55.542	-46.3867
43.9	-71.4111	-69.5801	-64.6973	-60.4248	-64.6973	-71.4111	-63.4766	-61.0352	-56.7627	-57.9834	-54.9316	-54.3213	-52.4902
44	-68.9697	-73.2422	-65.918	-62.2559	-65.3076	-67.1387	-65.3076	-62.2559	-52.4902	-59.2041	-50.6592	-53.7109	-51.2695
44.1	-78.125	-83.0078	-65.3076	-68.9697	-56.7627	-67.749	-67.749	-61.0352	-61.6455	-65.3076	-48.2178	-58.5938	-48.8281
44.2	-70.1904	-69.5801	-65.3076	-70.8008	-66.5283	-68.3594	-64.6973	-66.5283	-64.6973	-57.9834	-52.4902	-52.4902	-51.2695
44.3	-70.8008	-72.6318	-56.7627	-67.749	-64.6973	-67.749	-67.1387	-70.8008	-61.6455	-55.542	-50.6592	-53.1006	-52.4902
44.4	-75.6836	-75.6836	-63.4766	-62.2559	-64.0869	-64.6973	-61.0352	-58.5938	-61.6455	-59.8145	-50.0488	-54.3213	-54.9316
44.5	-82.3975	-70.1904	-65.3076	-67.1387	-62.8662	-69.5801	-64.6973	-61.0352	-61.6455	-58.5938	-54.3213	-58.5938	-51.8799
44.6	-72.0215	-71.4111	-61.0352	-68.9697	-68.3594	-64.6973	-61.0352	-58.5938	-56.1523	-56.1523	-57.373	-51.8799	-53.7109
44.7	-70.8008	-75.6836	-64.6973	-65.918	-67.749	-68.9697	-64.6973	-65.3076	-62.8662	-62.8662	-50.6592	-53.1006	-53.7109
44.8	-73.2422	-72.6318	-65.3076	-64.6973	-61.0352	-69.5801	-67.1387	-64.0869	-56.7627	-59.2041	-53.7109	-55.542	-54.9316
44.9	-71.4111	-75.0732	-68.9697	-59.8145	-72.0215	-69.5801	-65.3076	-57.9834	-62.8662	-65.918	-51.2695	-52.4902	-46.9971
45	-67.1387	-72.6318	-57.373	-71.4111	-64.0869	-62.8662	-61.0352	-63.4766	-61.0352	-56.7627	-50.6592	-49.4385	-52.4902
45.1	-71.4111	-69.5801	-69.5801	-64.6973	-70.1904	-68.3594	-61.6455	-63.4766	-67.749	-52.4902	-51.2695	-58.5938	-57.373
45.2	-72.6318	-62.8662	-62.2559	-67.1387	-65.918	-75.0732	-59.2041	-58.5938	-60.4248	-61.6455	-53.7109	-46.9971	-51.2695
45.3	-73.8525	-68.3594	-65.918	-64.6973	-70.8008	-65.918	-63.4766	-61.6455	-61.6455	-59.8145	-51.2695	-51.2695	-49.4385
45.4	-79.9561	-73.2422	-64.6973	-66.5283	-65.3076	-67.1387	-59.2041	-61.0352	-62.8662	-60.4248	-51.8799	-52.4902	-54.9316
45.5	-79.3457	-73.2422	-63.4766	-64.6973	-73.2422	-64.6973	-70.1904	-66.5283	-63.4766	-59.8145	-53.1006	-50.0488	-56.7627
45.6	-73.2422	-76.2939	-67.1387	-65.918	-70.8008	-68.3594	-62.8662	-65.3076	-67.1387	-59.2041	-47.6074	-54.9316	-49.4385
45.7	-74.4629	-71.4111	-64.0869	-60.4248	-71.4111	-69.5801	-59.8145	-68.3594	-61.0352	-56.7627	-54.9316	-48.8281	-53.7109
45.8	-74.4629	-70.8008	-64.0869	-63.4766	-70.8008	-70.8008	-61.6455	-62.8662	-62.2559	-61.0352	-50.6592	-50.6592	-49.4385
45.9	-69.5801	-69.5801	-66.5283	-59.8145	-69.5801	-70.8008	-65.3076	-63.4766	-58.5938	-59.2041	-53.7109	-53.1006	-48.8281
46	-68.3594	-68.3594	-68.3594	-62.2559	-70.1904	-70.8008	-62.2559	-67.1387	-66.5283	-58.5938	-53.7109	-55.542	-55.542
46.1	-75.0732	-72.6318	-59.8145	-66.5283	-70.1904	-64.6973	-67.1387	-65.918	-64.0869	-58.5938	-53.7109	-49.4385	-55.542
46.2	-68.9697	-72.6318	-63.4766	-65.918	-67.1387	-60.4248	-67.1387	-63.4766	-64.0869	-59.2041	-51.2695	-51.2695	-58.5938
46.3	-68.3594	-64.6973	-69.5801	-67.749	-65.918	-62.8662	-67.1387	-60.4248	-62.2559	-59.8145	-57.9834	-55.542	-48.8281
46.4	-67.1387	-74.4629	-66.5283	-70.8008	-62.2559	-61.0352	-71.4111	-63.4766	-62.8662	-51.8799	-51.8799	-54.9316	-53.1006
46.5	-72.0215	-66.5283	-72.0215	-65.3076	-73.8525	-67.749	-69.5801	-65.3076	-62.8662	-51.2695	-49.4385	-48.8281	-57.373
46.6	-76.2939	-72.6318	-65.918	-64.6973	-72.6318	-69.5801	-64.6973	-58.5938	-61.6455	-57.373	-58.5938	-50.6592	-50.0488
46.7	-76.2939	-71.4111	-59.8145	-61.0352	-70.1904	-67.1387	-65.918	-61.0352	-56.1523	-64.0869	-54.9316	-48.8281	-56.1523
46.8	-70.1904	-72.6318	-62.8662	-69.5801	-75.0732	-67.1387	-62.2559	-59.8145	-61.0352	-56.7627	-52.4902	-49.4385	-51.8799
46.9	-63.4766	-70.8008	-57.373	-67.749	-69.5801	-71.4111	-59.2041	-60.4248	-65.3076	-64.0869	-54.3213	-51.2695	-51.2695
47	-72.6318	-73.2422	-63.4766	-70.1904	-68.3594	-67.749	-68.9697	-65.918	-61.0352	-58.5938	-59.8145	-50.0488	-48.2178
47.1	-69.5801	-72.0215	-68.3594	-65.3076	-69.5801	-75.6836	-60.4248	-68.3594	-65.3076	-60.4248	-51.8799	-53.7109	-51.2695
47.2	-68.9697	-72.0215	-65.918	-65.3076	-63.4766	-73.8525	-61.6455	-66.5283	-61.0352	-58.5938	-50.0488	-50.6592	-46.3867
47.3	-73.8525	-68.9697	-67.1387	-64.6973	-71.4111	-70.1904	-64.6973	-67.749	-62.8662	-61.0352	-50.0488	-53.1006	-48.2178
47.4	-73.8525	-67.749	-64.6973	-68.3594	-68.3594	-65.918	-59.8145	-72.0215	-60.4248	-62.8662	-52.4902	-48.8281	-53.7109
47.5	-72.0215	-75.0732	-65.918	-64.0869	-67.1387	-66.5283	-63.4766	-63.4766	-65.918	-60.4248	-50.0488	-48.8281	-45.7764
47.6	-73.2422	-75.0732	-63.4766	-66.5283	-70.1904	-68.3594	-69.5801	-66.5283	-65.918	-62.8662	-51.2695	-54.9316	-48.8281
47.7	-73.2422	-72.0215	-71.4111	-63.4766	-64.6973	-65.3076	-69.5801	-67.1387	-71.4111	-59.8145	-55.542	-55.542	-50.0488
47.8	-72.0215	-73.8525	-65.918	-67.749	-68.9697	-68.3594	-67.1387	-66.5283	-59.8145	-59.8145	-57.9834	-48.2178	-47.6074
47.9	-66.5283	-71.4111	-67.1387	-64.6973	-62.8662	-69.5801	-69.5801	-61.0352	-61.6455	-54.3213	-59.2041	-45.166	-46.3867
48	-76.2939	-68.3594	-72.6318	-68.3594	-62.2559	-61.0352	-62.8662	-61.6455	-69.5801	-61.0352	-54.9316	-53.1006	-50.6592
48.1	-71.4111	-72.6318	-69.5801	-64.6973	-64.6973	-64.0869	-65.918	-60.4248	-59.8145	-61.0352	-52.4902	-51.8799	-46.9971
48.2	-66.5283	-76.9043	-61.6455	-63.4766	-62.8662	-68.9697	-65.3076	-64.0869	-53.7109	-58.5938	-48.8281	-53.1006	-43.9453
48.3	-68.3594	-80.5664	-61.6455	-67.1387	-61.6455	-67.1387	-63.4766	-62.2559	-68.9697	-53.1006	-50.0488	-47.6074	-45.7764
48.4	-73.2422	-74.4629	-60.4248	-59.8145	-66.5283	-65.918	-71.4111	-67.1387	-65.3076	-57.9834	-54.9316	-56.1523	-57.373
48.5	-66.5283	-79.3457	-65.3076	-65.918	-68.9697	-66.5283	-62.2559	-63.4766	-62.8662	-53.7109	-62.2559	-48.2178	-55.542
48.6	-77.5146	-75.6836	-63.4766	-68.9697	-72.0215	-68.3594	-64.0869	-70.1904	-65.3076	-55.542	-53.1006	-54.9316	-48.8281
48.7	-60.4248	-68.3594	-58.5938	-67.1387	-70.8008	-67.749	-68.3594	-61.6455	-62.8662	-54.9316	-50.0488	-56.1523	-50.6592
48.8	-73.8525	-68.9697	-68.9697	-67.1387	-68.9697	-65.3076	-65.918	-67.1387	-60.4248	-48.8281	-52.4902	-55.542	-57.373
48.9	-73.2422	-76.2939	-63.4766	-62.8662	-67.1387	-72.0215	-70.1904	-65.918	-64.6973	-58.5938	-55.542	-48.8281	-48.2178
49	-65.3076	-70.8008	-55.542	-67.749	-70.1904	-67.1387	-62.2559	-64.6973	-61.0352	-54.9316	-54.3213	-51.2695	-52.4902
49.1	-73.2422	-71.4111	-65.3076	-70.8008	-65.918	-62.8662	-65.918	-63.4766	-62.8662	-57.9834	-57.373	-53.1006	-57.373
49.2	-67.749	-72.0215	-64.6973	-71.4111	-70.8008	-72.6318	-64.6973	-60.4248	-70.8008	-65.3076	-58.5938	-52.4902	-61.0352
49.3	-76.9043	-71.4111	-58.5938	-67.749	-68.3594	-64.0869	-64.6973	-61.6455	-62.2559	-54.9316	-53.7109	-49.4385	-57.9834
49.4	-72.0215	-68.9697	-63.4766	-62.8662	-66.5283	-61.6455	-61.6455	-59.2041	-62.2559	-54.9316	-53.7109	-50.0488	-50.0488
49.5	-67.1387	-72.0215	-56.1523	-62.2559	-65.3076	-67.749	-65.3076	-63.4766	-57.9834	-51.8799	-56.1523	-46.9971	-48.2178
49.6	-77.5146	-75.0732	-63.4766	-67.1387	-68.9697	-62.8662	-65.918	-59.8145	-62.2559	-60.4248	-50.6592	-57.373	-54.9316
49.7	-69.5801	-67.1387	-62.8662	-61.0352	-65.3076	-61.6455	-67.1387	-64.6973	-62.8662	-50.6592	-51.8799	-55.542	-53.1006
49.8	-70.8008	-72.0215	-61.6455	-66.5283	-69.5801	-58.5938	-72.0215	-67.1387	-65.3076	-58.5938	-48.2178	-48.8281	-48.8281
49.9	-62.2559	-70.1904	-65.3076	-65.918	-69.5801	-67.1387	-61.0352	-62.8662	-62.2559	-51.8799	-51.8799	-51.8799	-54.9316
50	-73.8525	-75.0732	-63.4766	-64.0869	-70.1904	-70.1904	-61.6455	-61.0352	-62.2559	-58.5938	-47.6074	-56.1523	-49.4385
50.1	-70.8008	-68.3594	-65.3076	-65.3076	-73.2422	-63.4766	-70.8008	-63.4766	-64.6973	-59.2041	-46.9971	-42.1143	-46.3867
50.2	-68.3594	-71.4111	-62.8662	-68.9697	-74.4629	-66.5283	-65.918	-62.2559	-65.3076	-51.2695	-50.6592	-48.8281	-51.8799
50.3	-71.4111	-82.3975	-61.6455	-64.0869	-77.5146	-67.1387	-64.0869	-57.373	-62.2559	-57.9834	-50.6592	-55.542	-57.9834
50.4	-69.5801	-65.3076	-63.4766	-65.918	-70.1904	-69.5801	-62.2559	-67.749	-60.4248	-55.542	-53.1006	-56.1523	-49.4385
50.5	-67.749	-73.2422	-62.2559	-62.8662	-68.3594	-70.1904	-59.8145	-57.9834	-65.918	-59.8145	-54.3213	-50.6592	-54.3213
50.6	-75.0732	-67.749	-61.6455	-66.5283	-68.3594	-62.2559	-65.918	-61.0352	-65.3076	-53.1006	-53.1006	-46.9971	-54.3213
50.7	-67.749	-73.2422	-65.918	-62.2559	-71.4111	-64.6973	-59.2041	-56.7627	-68.9697	-52.4902	-51.2695	-50.0488	-46.9971
50.8	-71.4111	-76.2939	-61.0352	-67.1387	-68.9697	-64.0869	-59.8145	-63.4766	-58.5938	-57.9834	-48.8281	-46.9971	-57.9834
50.9	-69.5801	-68.3594	-62.2559	-59.8145	-68.9697	-70.8008	-59.2041	-64.6973	-65.918	-54.3213	-51.8799	-50.6592	-55.542
51	-66.5283	-71.4111	-62.2559	-64.6973	-61.0352	-66.5283	-63.4766	-71.4111	-62.8662	-56.1523	-53.1006	-53.7109	-50.0488
51.1	-70.8008	-74.4629	-58.5938	-61.6455	-70.1904	-66.5283	-59.8145	-60.4248	-64.0869	-55.542	-53.1006	-49.4385	-48.8281
51.2	-64.0869	-70.1904	-68.3594	-63.4766	-68.9697	-68.3594	-66.5283	-68.3594	-56.7627	-58.5938	-56.7627	-49.4385	-47.6074
51.3	-68.9697	-72.6318	-67.749	-63.4766	-74.4629	-68.9697	-56.1523	-62.8662	-62.2559	-51.2695	-56.7627	-53.1006	-50.0488
51.4	-62.8662	-72.6318	-65.3076	-59.8145	-68.3594	-73.2422	-67.749	-59.2041	-57.9834	-59.2041	-53.7109	-46.3867	-56.1523
51.5	-64.6973	-69.5801	-59.8145	-72.0215	-64.6973	-68.3594	-70.8008	-64.6973	-58.5938	-56.7627	-50.0488	-46.9971	-48.8281
51.6	-72.6318	-76.2939	-65.918	-61.6455	-68.9697	-64.0869	-64.6973	-69.5801	-52.4902	-53.7109	-51.2695	-42.1143	-53.7109
51.7	-70.1904	-78.7354	-65.3076	-67.1387	-65.918	-64.6973	-61.6455	-66.5283	-60.4248	-56.1523	-56.1523	-51.8799	-54.9316
51.8	-67.1387	-63.4766	-67.749	-70.1904	-67.1387	-63.4766	-59.2041	-63.4766	-56.1523	-58.5938	-57.9834	-54.9316	-53.1006
51.9	-70.1904	-73.2422	-59.8145	-67.749	-72.0215	-68.3594	-62.8662	-62.2559	-62.2559	-60.4248	-51.2695	-48.2178	-51.2695
52	-67.749	-73.2422	-64.6973	-70.8008	-70.8008	-63.4766	-67.749	-67.1387	-64.6973	-56.7627	-57.9834	-48.2178	-50.0488
52.1	-71.4111	-75.0732	-67.1387	-65.918	-64.0869	-62.2559	-67.1387	-63.4766	-55.542	-59.2041	-51.2695	-47.6074	-50.6592
52.2	-70.1904	-68.3594	-59.2041	-63.4766	-67.1387	-66.5283	-64.0869	-55.542	-63.4766	-54.3213	-49.4385	-51.2695	-46.9971
52.3	-68.9697	-70.1904	-62.8662	-68.3594	-68.9697	-65.918	-63.4766	-68.3594	-57.373	-55.542	-57.373	-48.8281	-50.0488
52.4	-74.4629	-70.1904	-61.6455	-67.1387	-67.1387	-67.749	-64.6973	-64.0869	-58.5938	-52.4902	-52.4902	-53.1006	-47.6074
52.5	-68.9697	-68.3594	-65.3076	-70.8008	-71.4111	-64.6973	-64.0869	-52.4902	-56.1523	-52.4902	-61.0352	-51.8799	-51.8799
52.6	-68.9697	-65.918	-64.0869	-66.5283	-68.9697	-60.4248	-68.9697	-64.6973	-59.8145	-53.7109	-57.9834	-50.0488	-51.2695
52.7	-68.9697	-72.6318	-65.918	-65.918	-68.3594	-70.1904	-62.2559	-63.4766	-62.8662	-54.3213	-51.2695	-43.335	-50.0488
52.8	-69.5801	-81.7871	-65.918	-72.0215	-70.8008	-67.1387	-62.2559	-64.0869	-61.0352	-52.4902	-57.373	-47.6074	-51.2695
52.9	-67.749	-70.1904	-65.3076	-69.5801	-75.6836	-61.0352	-68.3594	-62.8662	-70.1904	-55.542	-51.2695	-48.2178	-46.9971
53	-70.8008	-78.125	-62.2559	-68.3594	-66.5283	-64.6973	-65.918	-63.4766	-56.7627	-54.9316	-53.1006	-50.0488	-52.4902
53.1	-70.1904	-68.3594	-59.8145	-62.2559	-65.3076	-70.1904	-64.0869	-63.4766	-61.0352	-58.5938	-56.1523	-57.373	-53.1006
53.2	-65.918	-64.6973	-64.6973	-64.0869	-67.749	-67.1387	-59.8145	-61.0352	-62.2559	-54.3213	-53.7109	-50.0488	-40.2832
53.3	-72.6318	-67.1387	-62.2559	-65.3076	-62.8662	-66.5283	-65.3076	-57.9834	-57.9834	-56.1523	-55.542	-53.1006	-55.542
53.4	-61.6455	-70.8008	-61.6455	-69.5801	-69.5801	-67.749	-70.1904	-56.7627	-63.4766	-56.7627	-50.0488	-54.9316	-59.2041
53.5	-70.1904	-70.8008	-68.3594	-67.749	-72.0215	-70.1904	-65.918	-60.4248	-62.8662	-52.4902	-48.8281	-50.0488	-48.8281
53.6	-63.4766	-70.1904	-68.3594	-65.3076	-66.5283	-62.8662	-63.4766	-60.4248	-53.7109	-51.8799	-54.9316	-50.0488	-51.8799
53.7	-72.0215	-67.1387	-64.0869	-62.2559	-68.3594	-65.918	-69.5801	-65.918	-62.8662	-54.9316	-51.8799	-45.166	-49.4385
53.8	-67.1387	-62.2559	-65.3076	-72.0215	-71.4111	-71.4111	-67.1387	-65.3076	-59.2041	-53.7109	-56.1523	-51.2695	-52.4902
53.9	-64.6973	-65.918	-67.1387	-64.6973	-62.8662	-73.8525	-64.6973	-59.8145	-57.9834	-52.4902	-56.7627	-56.1523	-54.3213
54	-68.9697	-73.2422	-67.1387	-70.1904	-72.0215	-62.2559	-51.2695	-61.0352	-55.542	-53.7109	-51.8799	-49.4385	-51.8799
54.1	-71.4111	-75.0732	-72.6318	-65.918	-70.1904	-67.1387	-61.6455	-64.0869	-54.3213	-57.373	-60.4248	-46.9971	-46.3867
54.2	-68.9697	-70.8008	-65.918	-67.1387	-64.6973	-61.6455	-63.4766	-64.0869	-60.4248	-54.3213	-53.1006	-55.542	-51.8799
54.3	-69.5801	-71.4111	-64.0869	-63.4766	-66.5283	-68.3594	-62.8662	-70.1904	-54.9316	-57.9834	-53.1006	-51.2695	-53.7109
54.4	-70.8008	-69.5801	-64.6973	-68.9697	-64.0869	-66.5283	-64.0869	-62.8662	-51.2695	-54.9316	-55.542	-52.4902	-54.9316
54.5	-71.4111	-73.8525	-73.8525	-63.4766	-69.5801	-64.0869	-64.6973	-63.4766	-57.373	-49.4385	-49.4385	-54.9316	-47.6074
54.6	-70.8008	-78.125	-67.749	-76.9043	-61.6455	-66.5283	-63.4766	-61.6455	-54.9316	-51.8799	-52.4902	-48.8281	-50.6592
54.7	-68.3594	-70.8008	-65.918	-65.3076	-71.4111	-68.3594	-56.1523	-64.0869	-55.542	-62.8662	-50.6592	-46.3867	-43.9453
54.8	-64.6973	-76.2939	-67.749	-68.3594	-69.5801	-66.5283	-63.4766	-62.8662	-61.0352	-54.9316	-51.2695	-54.9316	-51.2695
54.9	-70.8008	-75.6836	-70.1904	-69.5801	-67.749	-68.3594	-66.5283	-66.5283	-54.9316	-52.4902	-53.1006	-53.1006	-56.1523
55	-73.8525	-72.6318	-62.8662	-68.9697	-70.8008	-70.1904	-62.8662	-67.749	-51.8799	-58.5938	-53.7109	-49.4385	-53.1006
55.1	-67.749	-76.2939	-70.8008	-66.5283	-65.3076	-72.0215	-68.9697	-62.8662	-59.2041	-58.5938	-55.542	-52.4902	-54.3213
55.2	-67.749	-72.0215	-70.1904	-67.749	-70.1904	-68.3594	-65.3076	-70.8008	-63.4766	-52.4902	-57.373	-57.9834	-47.6074
55.3	-67.1387	-74.4629	-66.5283	-71.4111	-70.8008	-62.2559	-57.373	-69.5801	-59.8145	-59.2041	-53.7109	-55.542	-51.2695
55.4	-70.1904	-68.3594	-67.749	-66.5283	-75.6836	-71.4111	-73.8525	-61.0352	-54.9316	-54.9316	-51.2695	-51.8799	-55.542
55.5	-67.749	-78.7354	-65.3076	-74.4629	-73.8525	-64.6973	-64.0869	-61.0352	-61.6455	-50.6592	-53.7109	-44.5557	-51.8799
55.6	-73.8525	-66.5283	-70.1904	-73.2422	-68.3594	-66.5283	-68.3594	-67.1387	-61.0352	-61.6455	-52.4902	-54.9316	-51.8799
55.7	-73.2422	-68.9697	-66.5283	-71.4111	-67.1387	-70.8008	-72.0215	-69.5801	-53.7109	-50.6592	-53.1006	-55.542	-45.7764
55.8	-65.918	-69.5801	-68.3594	-64.6973	-75.6836	-69.5801	-68.9697	-67.749	-64.6973	-56.1523	-53.1006	-51.8799	-51.2695
55.9	-72.6318	-69.5801	-67.749	-76.2939	-73.2422	-69.5801	-65.918	-61.6455	-63.4766	-56.7627	-54.9316	-54.3213	-46.9971
56	-66.5283	-77.5146	-62.8662	-73.2422	-67.749	-70.8008	-72.0215	-65.918	-62.8662	-56.1523	-53.1006	-51.2695	-54.9316
56.1	-72.0215	-72.0215	-64.6973	-67.749	-75.0732	-68.3594	-63.4766	-70.1904	-61.6455	-56.7627	-51.8799	-51.8799	-51.2695
56.2	-70.8008	-67.1387	-67.1387	-68.3594	-62.8662	-67.1387	-65.3076	-70.8008	-63.4766	-62.2559	-49.4385	-50.6592	-51.2695
56.3	-70.1904	-69.5801	-70.8008	-67.1387	-65.918	-68.3594	-66.5283	-72.6318	-59.2041	-60.4248	-54.9316	-55.542	-45.7764
56.4	-66.5283	-67.1387	-68.9697	-72.6318	-68.9697	-65.3076	-63.4766	-67.1387	-62.8662	-57.9834	-54.3213	-53.1006	-50.6592
56.5	-70.8008	-74.4629	-63.4766	-67.749	-67.749	-71.4111	-70.8008	-64.6973	-57.9834	-56.1523	-48.8281	-52.4902	-45.166
56.6	-69.5801	-75.0732	-72.0215	-73.8525	-69.5801	-62.8662	-68.9697	-63.4766	-57.9834	-57.9834	-53.1006	-53.7109	-46.9971
56.7	-75.0732	-73.2422	-66.5283	-70.1904	-67.749	-67.1387	-72.6318	-67.749	-63.4766	-53.1006	-55.542	-54.3213	-51.8799
56.8	-66.5283	-65.3076	-65.3076	-70.1904	-67.749	-65.918	-68.9697	-63.4766	-59.2041	-54.3213	-56.7627	-61.0352	-45.166
56.9	-68.9697	-72.0215	-61.6455	-65.918	-71.4111	-66.5283	-63.4766	-67.1387	-64.6973	-57.373	-49.4385	-59.2041	-53.7109
57	-72.0215	-72.0215	-68.3594	-65.3076	-70.1904	-61.0352	-64.0869	-72.6318	-62.8662	-64.0869	-51.2695	-53.7109	-53.7109
57.1	-68.3594	-67.749	-68.9697	-70.8008	-68.3594	-68.9697	-67.749	-71.4111	-61.0352	-62.2559	-53.1006	-53.1006	-44.5557
57.2	-72.0215	-71.4111	-59.8145	-61.0352	-63.4766	-63.4766	-68.3594	-63.4766	-64.6973	-57.9834	-50.6592	-56.7627	-53.7109
57.3	-73.2422	-75.0732	-64.0869	-68.9697	-72.0215	-61.6455	-68.3594	-64.6973	-58.5938	-53.7109	-51.2695	-53.7109	-51.8799
57.4	-72.0215	-73.2422	-62.2559	-60.4248	-65.918	-74.4629	-61.6455	-72.0215	-65.3076	-55.542	-59.2041	-55.542	-53.1006
57.5	-71.4111	-75.6836	-68.3594	-71.4111	-67.749	-70.8008	-62.8662	-72.0215	-57.9834	-57.9834	-48.2178	-54.3213	-48.8281
57.6	-72.0215	-79.9561	-65.3076	-70.8008	-67.749	-61.6455	-64.6973	-57.9834	-59.8145	-53.1006	-49.4385	-43.9453	-52.4902
57.7	-70.1904	-73.2422	-62.8662	-74.4629	-68.9697	-63.4766	-62.8662	-56.1523	-70.8008	-62.2559	-54.9316	-52.4902	-48.8281
57.8	-73.8525	-79.3457	-62.8662	-71.4111	-70.1904	-68.3594	-67.749	-64.6973	-65.918	-55.542	-51.2695	-49.4385	-50.6592
57.9	-68.9697	-70.1904	-61.6455	-72.6318	-68.9697	-64.0869	-67.1387	-67.749	-65.918	-53.7109	-54.9316	-46.9971	-50.0488
58	-68.9697	-73.2422	-72.0215	-69.5801	-70.8008	-73.2422	-60.4248	-65.918	-63.4766	-51.2695	-50.0488	-47.6074	-54.3213
58.1	-72.0215	-76.2939	-68.3594	-65.3076	-63.4766	-67.1387	-73.2422	-70.1904	-55.542	-57.9834	-48.2178	-49.4385	-50.0488
58.2	-68.3594	-72.6318	-64.0869	-65.3076	-68.9697	-72.0215	-64.6973	-65.3076	-54.3213	-54.9316	-49.4385	-52.4902	-53.1006
58.3	-70.8008	-79.3457	-67.749	-69.5801	-68.3594	-66.5283	-66.5283	-60.4248	-54.3213	-57.373	-46.3867	-50.0488	-48.2178
58.4	-69.5801	-76.9043	-57.9834	-69.5801	-67.749	-62.2559	-64.0869	-67.1387	-61.0352	-63.4766	-56.1523	-54.9316	-49.4385
58.5	-75.0732	-68.9697	-65.918	-73.2422	-73.2422	-73.8525	-62.8662	-61.0352	-56.1523	-56.7627	-51.8799	-58.5938	-51.8799
58.6	-65.918	-78.125	-66.5283	-69.5801	-67.1387	-62.8662	-61.6455	-67.749	-60.4248	-62.8662	-59.8145	-52.4902	-48.8281
58.7	-66.5283	-76.2939	-68.9697	-67.1387	-65.918	-67.749	-70.8008	-62.8662	-61.0352	-59.8145	-51.2695	-51.2695	-48.2178
58.8	-71.4111	-68.9697	-70.8008	-71.4111	-70.1904	-66.5283	-65.918	-64.0869	-55.542	-52.4902	-51.8799	-49.4385	-50.0488
58.9	-66.5283	-70.1904	-70.8008	-70.8008	-68.3594	-78.7354	-66.5283	-56.7627	-65.918	-61.6455	-48.8281	-51.8799	-45.166
59	-74.4629	-72.6318	-67.749	-71.4111	-70.8008	-71.4111	-68.9697	-72.0215	-56.1523	-59.8145	-44.5557	-54.9316	-54.3213
59.1	-68.3594	-72.6318	-62.8662	-68.3594	-70.8008	-65.918	-65.918	-59.2041	-62.2559	-55.542	-43.9453	-57.373	-42.1143
59.2	-68.9697	-76.2939	-68.9697	-74.4629	-64.6973	-72.0215	-65.3076	-70.8008	-57.373	-52.4902	-50.0488	-55.542	-56.7627
59.3	-68.3594	-78.125	-65.918	-70.8008	-72.0215	-67.749	-65.918	-64.6973	-61.0352	-57.373	-46.9971	-50.0488	-51.2695
59.4	-66.5283	-72.0215	-59.2041	-71.4111	-69.5801	-58.5938	-70.8008	-70.1904	-64.6973	-59.2041	-43.335	-50.6592	-57.9834
59.5	-70.1904	-74.4629	-62.8662	-69.5801	-68.9697	-65.918	-65.918	-68.9697	-62.8662	-53.7109	-51.2695	-48.2178	-50.0488
59.6	-64.6973	-79.9561	-68.3594	-70.1904	-69.5801	-65.918	-62.2559	-71.4111	-62.8662	-53.1006	-51.2695	-55.542	-50.6592
59.7	-72.6318	-81.1768	-72.0215	-73.2422	-68.9697	-68.9697	-67.749	-64.6973	-64.6973	-54.9316	-53.7109	-46.3867	-50.0488
59.8	-74.4629	-79.3457	-62.8662	-70.8008	-62.8662	-62.8662	-64.6973	-75.0732	-59.8145	-56.7627	-53.7109	-56.7627	-52.4902
59.9	-74.4629	-75.0732	-56.7627	-70.1904	-68.3594	-67.1387	-70.8008	-69.5801	-58.5938	-53.7109	-52.4902	-44.5557	-46.3867
60	-70.8008	-75.6836	-67.749	-73.2422	-68.9697	-73.2422	-68.9697	-65.918	-58.5938	-57.373	-50.6592	-53.7109	-52.4902
60.1	-70.8008	-69.5801	-61.6455	-70.8008	-65.918	-62.2559	-70.1904	-65.918	-59.8145	-57.373	-52.4902	-53.7109	-53.7109
60.2	-72.6318	-78.7354	-65.3076	-72.0215	-64.6973	-63.4766	-71.4111	-65.3076	-59.2041	-62.2559	-54.3213	-46.9971	-44.5557
60.3	-77.5146	-73.2422	-61.0352	-67.749	-74.4629	-65.3076	-63.4766	-68.3594	-53.7109	-63.4766	-51.2695	-54.9316	-51.8799
60.4	-78.125	-75.0732	-60.4248	-73.2422	-70.1904	-68.9697	-62.8662	-60.4248	-58.5938	-51.2695	-51.8799	-53.7109	-48.8281
60.5	-70.8008	-71.4111	-67.749	-68.3594	-71.4111	-67.749	-65.3076	-66.5283	-54.3213	-55.542	-47.6074	-50.0488	-45.7764
60.6	-74.4629	-77.5146	-61.0352	-67.1387	-64.6973	-63.4766	-68.9697	-59.2041	-63.4766	-55.542	-56.7627	-48.8281	-49.4385
60.7	-70.1904	-75.6836	-60.4248	-72.6318	-65.918	-67.1387	-62.2559	-65.3076	-62.2559	-49.4385	-51.8799	-52.4902	-51.8799
60.8	-68.9697	-72.0215	-65.918	-72.0215	-64.6973	-61.6455	-67.749	-62.2559	-59.2041	-62.2559	-49.4385	-51.8799	-50.6592
60.9	-73.2422	-73.8525	-61.6455	-63.4766	-68.3594	-68.3594	-72.0215	-64.0869	-53.7109	-49.4385	-51.8799	-49.4385	-46.9971
61	-78.125	-73.2422	-63.4766	-67.1387	-70.1904	-62.2559	-65.3076	-69.5801	-64.6973	-54.9316	-55.542	-56.1523	-52.4902
61.1	-70.8008	-75.6836	-62.2559	-68.3594	-63.4766	-75.0732	-65.918	-67.1387	-53.7109	-57.9834	-43.9453	-49.4385	-51.2695
61.2	-70.1904	-75.6836	-55.542	-70.1904	-67.749	-70.8008	-65.3076	-67.1387	-61.6455	-53.7109	-54.3213	-53.1006	-48.8281
61.3	-68.3594	-73.2422	-62.8662	-69.5801	-67.749	-66.5283	-67.749	-62.2559	-60.4248	-57.373	-51.2695	-57.373	-53.7109
61.4	-71.4111	-70.8008	-62.8662	-67.1387	-70.1904	-68.3594	-60.4248	-64.6973	-60.4248	-59.8145	-52.4902	-49.4385	-45.7764
61.5	-70.1904	-71.4111	-61.6455	-73.2422	-70.8008	-67.1387	-63.4766	-59.8145	-56.7627	-56.7627	-46.9971	-46.9971	-53.1006
61.6	-72.0215	-74.4629	-62.2559	-73.2422	-64.6973	-70.1904	-61.0352	-67.749	-64.0869	-59.2041	-49.4385	-53.1006	-45.7764
61.7	-67.1387	-69.5801	-65.918	-71.4111	-65.3076	-72.0215	-62.2559	-61.0352	-59.2041	-59.8145	-50.0488	-51.2695	-48.8281
61.8	-72.0215	-74.4629	-62.2559	-68.9697	-59.8145	-68.3594	-69.5801	-67.749	-59.8145	-57.9834	-48.2178	-54.3213	-48.2178
61.9	-75.0732	-72.6318	-58.5938	-65.3076	-64.6973	-66.5283	-63.4766	-67.1387	-61.6455	-57.373	-52.4902	-54.9316	-49.4385
62	-62.2559	-73.8525	-59.8145	-64.0869	-64.6973	-73.2422	-62.8662	-68.3594	-55.542	-53.1006	-41.5039	-53.1006	-54.9316
62.1	-73.2422	-65.3076	-61.0352	-67.1387	-71.4111	-72.0215	-65.3076	-65.3076	-54.3213	-53.7109	-54.9316	-52.4902	-50.6592
62.2	-71.4111	-76.9043	-59.2041	-67.1387	-68.9697	-66.5283	-61.6455	-62.8662	-60.4248	-57.373	-46.3867	-49.4385	-57.373
62.3	-76.2939	-72.0215	-62.2559	-72.0215	-67.749	-65.3076	-61.0352	-67.749	-58.5938	-61.6455	-54.9316	-47.6074	-53.7109
62.4	-69.5801	-70.8008	-70.1904	-68.9697	-69.5801	-63.4766	-64.6973	-61.6455	-59.2041	-62.2559	-51.2695	-53.7109	-50.0488
62.5	-75.6836	-75.0732	-67.1387	-73.8525	-67.749	-65.3076	-62.8662	-67.1387	-60.4248	-58.5938	-48.8281	-50.0488	-51.2695
62.6	-72.6318	-72.0215	-58.5938	-71.4111	-64.6973	-67.749	-56.7627	-61.6455	-66.5283	-59.8145	-50.6592	-52.4902	-55.542
62.7	-75.6836	-70.1904	-60.4248	-68.3594	-64.6973	-67.749	-61.6455	-59.2041	-58.5938	-54.9316	-48.8281	-53.7109	-52.4902
62.8	-68.9697	-72.6318	-62.8662	-66.5283	-70.1904	-70.1904	-62.8662	-63.4766	-59.2041	-55.542	-54.3213	-51.2695	-54.3213
62.9	-71.4111	-68.3594	-63.4766	-74.4629	-66.5283	-67.749	-62.2559	-61.0352	-62.8662	-59.8145	-53.7109	-51.8799	-53.7109
63	-65.3076	-68.9697	-66.5283	-63.4766	-64.0869	-63.4766	-61.0352	-67.1387	-55.542	-54.9316	-46.9971	-51.2695	-46.9971
63.1	-72.0215	-73.2422	-62.2559	-68.3594	-67.1387	-66.5283	-62.8662	-62.8662	-63.4766	-51.2695	-50.6592	-51.2695	-50.6592
63.2	-70.8008	-71.4111	-61.6455	-70.8008	-65.918	-70.1904	-68.3594	-62.2559	-57.373	-61.6455	-53.7109	-56.7627	-51.2695
63.3	-72.0215	-72.6318	-66.5283	-72.6318	-67.1387	-63.4766	-57.373	-63.4766	-62.2559	-57.373	-54.9316	-46.9971	-51.8799
63.4	-67.1387	-70.8008	-62.2559	-74.4629	-58.5938	-71.4111	-63.4766	-65.918	-56.7627	-54.3213	-52.4902	-59.8145	-45.7764
63.5	-67.749	-77.5146	-66.5283	-68.3594	-70.1904	-65.3076	-65.918	-68.9697	-57.9834	-65.3076	-43.9453	-54.9316	-48.8281
63.6	-65.918	-67.1387	-65.3076	-64.0869	-64.0869	-67.749	-63.4766	-60.4248	-54.9316	-59.8145	-54.9316	-50.0488	-54.9316
63.7	-67.749	-66.5283	-66.5283	-67.749	-59.2041	-69.5801	-66.5283	-57.373	-64.6973	-56.1523	-53.1006	-55.542	-49.4385
63.8	-74.4629	-67.749	-72.0215	-77.5146	-71.4111	-75.0732	-67.749	-64.6973	-63.4766	-54.9316	-48.8281	-49.4385	-53.7109
63.9	-62.2559	-72.6318	-68.9697	-73.8525	-68.3594	-62.2559	-69.5801	-61.0352	-58.5938	-58.5938	-45.7764	-53.1006	-57.9834
64	-66.5283	-76.2939	-70.1904	-69.5801	-69.5801	-73.2422	-64.6973	-70.1904	-58.5938	-53.1006	-59.2041	-51.8799	-57.9834
64.1	-72.6318	-72.6318	-71.4111	-65.918	-65.3076	-59.2041	-65.918	-65.918	-57.9834	-54.9316	-51.8799	-54.9316	-49.4385
64.2	-64.6973	-72.6318	-61.6455	-73.2422	-65.918	-62.2559	-67.749	-63.4766	-59.2041	-59.2041	-47.6074	-54.9316	-52.4902
64.3	-68.3594	-72.0215	-72.6318	-71.4111	-65.3076	-68.9697	-70.8008	-57.9834	-58.5938	-57.373	-51.8799	-50.6592	-61.6455
64.4	-70.1904	-75.6836	-68.9697	-70.1904	-68.3594	-71.4111	-67.1387	-64.6973	-53.7109	-56.7627	-55.542	-53.1006	-51.2695
64.5	-72.0215	-76.2939	-62.2559	-65.918	-64.0869	-67.749	-71.4111	-61.0352	-57.9834	-59.8145	-47.6074	-56.1523	-59.2041
64.6	-70.8008	-71.4111	-61.6455	-68.3594	-67.1387	-68.9697	-69.5801	-62.2559	-54.9316	-61.6455	-51.8799	-47.6074	-60.4248
64.7	-64.6973	-77.5146	-64.0869	-70.1904	-67.749	-68.9697	-68.3594	-64.0869	-63.4766	-61.6455	-56.7627	-53.7109	-54.9316
64.8	-70.1904	-72.6318	-73.2422	-68.9697	-72.6318	-68.3594	-67.1387	-56.7627	-58.5938	-56.1523	-51.2695	-50.6592	-54.3213
64.9	-67.1387	-72.0215	-67.1387	-68.3594	-68.9697	-68.3594	-68.3594	-54.9316	-59.2041	-55.542	-53.1006	-51.2695	-52.4902
65	-70.8008	-75.0732	-65.918	-65.3076	-64.6973	-67.749	-67.749	-59.8145	-66.5283	-58.5938	-50.6592	-52.4902	-50.6592
65.1	-66.5283	-72.6318	-59.2041	-63.4766	-72.0215	-62.2559	-58.5938	-61.6455	-56.1523	-61.6455	-49.4385	-47.6074	-46.3867
65.2	-70.1904	-71.4111	-66.5283	-70.1904	-72.0215	-73.2422	-67.1387	-58.5938	-55.542	-56.7627	-48.8281	-51.2695	-49.4385
65.3	-65.3076	-76.9043	-63.4766	-64.6973	-71.4111	-65.3076	-61.6455	-59.8145	-64.6973	-53.1006	-48.2178	-51.2695	-51.2695
65.4	-70.1904	-72.6318	-71.4111	-70.8008	-68.3594	-65.918	-56.1523	-65.3076	-56.7627	-64.0869	-46.9971	-50.6592	-55.542
65.5	-67.1387	-76.2939	-66.5283	-66.5283	-67.1387	-66.5283	-59.2041	-67.749	-59.8145	-54.9316	-54.3213	-50.0488	-53.1006
65.6	-70.8008	-76.2939	-58.5938	-68.3594	-70.8008	-61.0352	-62.2559	-68.3594	-57.9834	-59.8145	-49.4385	-49.4385	-50.6592
65.7	-71.4111	-73.8525	-62.2559	-58.5938	-69.5801	-65.918	-66.5283	-56.7627	-59.8145	-57.373	-52.4902	-54.3213	-53.1006
65.8	-72.6318	-74.4629	-64.0869	-69.5801	-67.1387	-65.3076	-64.6973	-61.6455	-66.5283	-62.8662	-43.9453	-50.6592	-51.2695
65.9	-65.918	-72.6318	-65.3076	-68.9697	-69.5801	-67.1387	-61.0352	-59.8145	-59.2041	-53.7109	-56.7627	-47.6074	-50.0488
66	-66.5283	-64.6973	-61.0352	-72.6318	-70.1904	-70.8008	-60.4248	-61.0352	-58.5938	-54.3213	-51.8799	-49.4385	-43.9453
66.1	-69.5801	-72.0215	-65.918	-65.3076	-67.749	-65.918	-64.0869	-62.8662	-65.3076	-55.542	-50.6592	-53.1006	-53.1006
66.2	-64.6973	-75.6836	-57.373	-67.1387	-71.4111	-65.918	-64.6973	-57.9834	-56.1523	-54.3213	-51.2695	-53.1006	-53.1006
66.3	-67.1387	-70.8008	-63.4766	-61.0352	-72.6318	-67.1387	-58.5938	-71.4111	-62.2559	-61.0352	-51.2695	-53.1006	-50.6592
66.4	-70.8008	-73.2422	-64.0869	-66.5283	-70.8008	-61.0352	-64.6973	-61.6455	-61.6455	-58.5938	-52.4902	-56.1523	-48.2178
66.5	-71.4111	-74.4629	-62.8662	-68.9697	-70.1904	-67.1387	-67.1387	-56.1523	-64.0869	-56.7627	-50.0488	-50.0488	-44.5557
66.6	-65.3076	-76.2939	-63.4766	-62.2559	-72.6318	-65.3076	-72.6318	-57.9834	-57.373	-54.9316	-51.8799	-52.4902	-48.2178
66.7	-68.3594	-65.918	-64.6973	-70.8008	-68.3594	-68.9697	-62.2559	-62.2559	-65.3076	-53.7109	-51.8799	-50.0488	-50.0488
66.8	-65.918	-70.8008	-68.3594	-67.749	-77.5146	-61.0352	-64.6973	-60.4248	-57.9834	-54.9316	-51.8799	-50.6592	-48.8281
66.9	-70.1904	-69.5801	-56.7627	-72.0215	-70.8008	-70.1904	-65.3076	-61.6455	-60.4248	-56.7627	-46.3867	-52.4902	-50.6592
67	-70.8008	-67.749	-61.6455	-70.1904	-70.8008	-66.5283	-58.5938	-53.1006	-62.2559	-59.2041	-56.1523	-50.0488	-57.9834
67.1	-67.749	-71.4111	-65.3076	-68.9697	-74.4629	-65.3076	-70.8008	-62.2559	-62.2559	-56.1523	-46.3867	-53.1006	-46.9971
67.2	-68.9697	-72.6318	-62.2559	-65.918	-70.1904	-68.3594	-69.5801	-62.2559	-58.5938	-53.7109	-48.8281	-49.4385	-57.373
67.3	-64.6973	-77.5146	-61.6455	-64.6973	-70.1904	-69.5801	-70.1904	-64.6973	-59.2041	-57.9834	-49.4385	-49.4385	-52.4902
67.4	-70.1904	-68.9697	-63.4766	-69.5801	-70.1904	-70.1904	-64.0869	-62.8662	-62.2559	-55.542	-50.6592	-51.2695	-57.9834
67.5	-65.918	-74.4629	-56.1523	-72.0215	-71.4111	-61.0352	-56.7627	-63.4766	-58.5938	-54.9316	-53.1006	-51.8799	-50.6592
67.6	-70.1904	-70.1904	-62.8662	-70.8008	-67.749	-63.4766	-62.8662	-65.3076	-57.373	-57.9834	-52.4902	-53.7109	-53.1006
67.7	-70.1904	-70.1904	-61.0352	-72.0215	-74.4629	-62.2559	-62.8662	-60.4248	-59.8145	-56.7627	-50.0488	-46.9971	-56.1523
67.8	-63.4766	-68.3594	-62.2559	-71.4111	-72.0215	-64.6973	-65.3076	-64.6973	-56.1523	-58.5938	-56.1523	-53.1006	-57.9834
67.9	-67.749	-74.4629	-65.918	-78.125	-71.4111	-65.918	-65.918	-65.3076	-57.9834	-60.4248	-53.7109	-53.7109	-51.8799
68	-67.749	-66.5283	-63.4766	-67.1387	-67.749	-70.1904	-62.2559	-58.5938	-57.373	-59.2041	-56.1523	-56.7627	-53.1006
68.1	-72.0215	-69.5801	-67.1387	-70.1904	-71.4111	-67.1387	-68.3594	-62.8662	-57.9834	-56.1523	-48.8281	-49.4385	-49.4385
68.2	-63.4766	-67.1387	-67.1387	-74.4629	-63.4766	-70.8008	-67.749	-66.5283	-61.6455	-57.9834	-54.3213	-50.0488	-53.1006
68.3	-67.1387	-71.4111	-60.4248	-67.1387	-66.5283	-64.0869	-64.0869	-66.5283	-57.373	-57.9834	-56.7627	-52.4902	-51.8799
68.4	-68.9697	-68.3594	-66.5283	-65.918	-72.6318	-68.9697	-65.918	-57.373	-62.2559	-62.2559	-53.7109	-51.2695	-56.1523
68.5	-65.918	-71.4111	-64.6973	-68.3594	-69.5801	-59.8145	-67.1387	-57.373	-62.8662	-59.8145	-46.9971	-52.4902	-50.6592
68.6	-64.6973	-63.4766	-62.8662	-68.9697	-66.5283	-68.3594	-67.1387	-60.4248	-59.2041	-56.1523	-52.4902	-48.2178	-42.7246
68.7	-68.3594	-67.1387	-61.6455	-65.3076	-71.4111	-67.1387	-68.3594	-59.8145	-62.2559	-59.8145	-53.7109	-50.0488	-49.4385
68.8	-67.749	-67.1387	-62.2559	-71.4111	-67.1387	-70.1904	-70.8008	-63.4766	-61.0352	-62.8662	-53.7109	-50.6592	-49.4385
68.9	-64.6973	-67.1387	-65.3076	-72.6318	-70.1904	-66.5283	-65.3076	-68.9697	-56.7627	-59.8145	-56.1523	-50.6592	-54.3213
69	-65.918	-67.749	-61.6455	-72.6318	-64.0869	-69.5801	-63.4766	-68.3594	-64.0869	-56.7627	-52.4902	-50.0488	-53.7109
69.1	-68.9697	-72.0215	-66.5283	-64.6973	-69.5801	-67.749	-63.4766	-66.5283	-62.8662	-58.5938	-59.2041	-53.7109	-51.2695
69.2	-60.4248	-70.8008	-62.8662	-75.6836	-68.3594	-62.8662	-56.7627	-64.0869	-56.7627	-57.9834	-49.4385	-49.4385	-53.1006
69.3	-66.5283	-67.749	-62.2559	-68.3594	-71.4111	-69.5801	-71.4111	-66.5283	-57.9834	-58.5938	-48.8281	-45.166	-47.6074
69.4	-68.3594	-79.9561	-64.0869	-64.6973	-66.5283	-73.8525	-64.6973	-61.0352	-59.8145	-59.2041	-47.6074	-46.9971	-50.0488
69.5	-67.749	-76.2939	-66.5283	-67.749	-67.1387	-67.1387	-65.3076	-62.2559	-63.4766	-56.7627	-52.4902	-47.6074	-51.8799
69.6	-68.9697	-66.5283	-65.918	-61.6455	-64.0869	-65.3076	-61.0352	-60.4248	-61.0352	-57.373	-46.9971	-53.1006	-51.8799
69.7	-65.918	-69.5801	-66.5283	-67.1387	-68.9697	-63.4766	-66.5283	-59.8145	-65.3076	-50.0488	-51.8799	-50.6592	-49.4385
69.8	-68.9697	-65.918	-59.8145	-72.6318	-67.1387	-61.6455	-57.9834	-64.6973	-55.542	-59.2041	-55.542	-51.2695	-47.6074
69.9	-62.8662	-77.5146	-69.5801	-64.6973	-67.1387	-64.0869	-62.2559	-63.4766	-65.3076	-58.5938	-53.7109	-46.9971	-50.0488
70	-72.6318	-70.1904	-67.1387	-66.5283	-73.2422	-67.1387	-64.0869	-66.5283	-58.5938	-56.7627	-46.3867	-54.9316	-48.8281
70.1	-67.1387	-68.3594	-66.5283	-62.8662	-65.3076	-61.6455	-63.4766	-67.1387	-57.9834	-59.8145	-54.3213	-51.8799	-53.1006
70.2	-74.4629	-76.9043	-68.3594	-68.3594	-65.918	-62.8662	-65.918	-65.918	-54.9316	-60.4248	-49.4385	-47.6074	-49.4385
70.3	-72.0215	-74.4629	-68.9697	-61.6455	-61.0352	-64.0869	-63.4766	-67.1387	-58.5938	-61.0352	-54.3213	-57.9834	-46.3867
70.4	-61.0352	-75.6836	-59.8145	-65.3076	-62.8662	-62.8662	-64.0869	-64.6973	-61.6455	-50.6592	-56.7627	-52.4902	-54.3213
70.5	-70.1904	-69.5801	-70.1904	-71.4111	-69.5801	-65.918	-65.3076	-62.2559	-54.3213	-57.373	-52.4902	-51.2695	-56.7627
70.6	-68.3594	-69.5801	-64.6973	-65.918	-70.1904	-64.0869	-62.8662	-60.4248	-56.1523	-56.1523	-57.9834	-56.7627	-53.1006
70.7	-72.0215	-71.4111	-67.749	-61.6455	-69.5801	-70.1904	-67.749	-59.2041	-56.1523	-59.2041	-55.542	-53.7109	-51.8799
70.8	-68.3594	-73.2422	-61.0352	-68.3594	-66.5283	-61.0352	-62.8662	-59.2041	-62.2559	-58.5938	-50.0488	-54.9316	-45.7764
70.9	-73.2422	-70.1904	-67.1387	-70.8008	-65.3076	-62.2559	-67.1387	-59.2041	-62.8662	-56.1523	-57.9834	-54.9316	-50.0488
71	-73.2422	-71.4111	-67.1387	-70.1904	-68.3594	-65.3076	-64.6973	-64.6973	-57.9834	-56.7627	-54.9316	-57.373	-54.3213
71.1	-66.5283	-74.4629	-65.918	-70.1904	-66.5283	-61.0352	-68.9697	-61.6455	-57.9834	-55.542	-56.7627	-48.2178	-51.2695
71.2	-67.1387	-69.5801	-67.1387	-68.3594	-66.5283	-63.4766	-63.4766	-58.5938	-63.4766	-56.7627	-57.9834	-51.8799	-54.9316
71.3	-68.3594	-67.749	-66.5283	-64.6973	-65.918	-68.3594	-67.1387	-57.9834	-58.5938	-57.373	-57.373	-55.542	-56.1523
71.4	-68.9697	-73.8525	-68.3594	-65.3076	-64.0869	-64.6973	-64.0869	-54.9316	-57.9834	-58.5938	-46.3867	-50.0488	-42.7246
71.5	-68.9697	-71.4111	-64.6973	-67.1387	-62.8662	-62.8662	-65.3076	-59.2041	-56.7627	-53.7109	-48.8281	-55.542	-50.0488
71.6	-68.9697	-72.6318	-61.6455	-72.0215	-76.2939	-61.6455	-69.5801	-60.4248	-60.4248	-62.2559	-55.542	-48.8281	-49.4385
71.7	-72.6318	-68.3594	-71.4111	-68.3594	-68.3594	-57.9834	-68.3594	-62.8662	-62.2559	-54.9316	-53.7109	-50.6592	-56.7627
71.8	-67.1387	-71.4111	-68.9697	-73.8525	-65.918	-67.1387	-61.0352	-61.6455	-67.1387	-57.373	-59.2041	-51.2695	-52.4902
71.9	-68.3594	-68.3594	-72.0215	-70.1904	-68.3594	-65.3076	-65.918	-61.0352	-57.9834	-62.2559	-51.8799	-49.4385	-53.7109
72	-72.6318	-68.9697	-60.4248	-71.4111	-72.6318	-65.3076	-64.0869	-57.9834	-55.542	-50.0488	-54.3213	-51.8799	-47.6074
72.1	-71.4111	-68.9697	-69.5801	-76.2939	-62.8662	-59.2041	-64.0869	-56.1523	-59.8145	-62.8662	-51.2695	-49.4385	-46.3867
72.2	-73.2422	-64.6973	-64.0869	-72.6318	-69.5801	-65.918	-63.4766	-61.6455	-62.2559	-56.7627	-50.6592	-51.2695	-46.3867
72.3	-70.8008	-73.2422	-68.3594	-73.8525	-71.4111	-66.5283	-64.6973	-64.6973	-62.2559	-57.9834	-51.2695	-50.6592	-46.9971
72.4	-69.5801	-64.0869	-65.918	-71.4111	-68.3594	-68.9697	-65.918	-54.9316	-61.0352	-53.7109	-56.7627	-51.8799	-49.4385
72.5	-68.9697	-62.2559	-65.3076	-70.8008	-67.1387	-59.8145	-61.0352	-58.5938	-51.8799	-55.542	-56.1523	-57.373	-56.1523
72.6	-69.5801	-70.1904	-69.5801	-75.0732	-68.9697	-63.4766	-66.5283	-61.6455	-53.7109	-62.8662	-51.2695	-57.373	-54.9316
72.7	-70.8008	-78.125	-66.5283	-75.6836	-72.6318	-66.5283	-68.3594	-62.8662	-60.4248	-57.373	-59.2041	-50.0488	-48.2178
72.8	-66.5283	-65.918	-68.3594	-70.1904	-65.918	-67.1387	-59.2041	-59.2041	-54.9316	-56.1523	-54.3213	-57.373	-55.542
72.9	-68.3594	-67.1387	-65.918	-71.4111	-62.2559	-66.5283	-61.0352	-64.6973	-56.7627	-56.7627	-48.8281	-54.3213	-50.6592
73	-71.4111	-73.2422	-57.9834	-71.4111	-65.918	-63.4766	-73.2422	-52.4902	-64.0869	-50.6592	-52.4902	-56.1523	-53.7109
73.1	-69.5801	-73.2422	-66.5283	-75.0732	-62.8662	-69.5801	-61.0352	-62.8662	-58.5938	-60.4248	-53.1006	-54.3213	-46.9971
73.2	-72.0215	-78.7354	-64.6973	-63.4766	-71.4111	-62.8662	-65.918	-63.4766	-63.4766	-51.2695	-60.4248	-54.9316	-48.2178
73.3	-71.4111	-72.6318	-62.2559	-72.6318	-69.5801	-70.1904	-63.4766	-54.3213	-54.3213	-48.8281	-62.2559	-52.4902	-62.8662
73.4	-71.4111	-70.1904	-71.4111	-66.5283	-67.749	-62.8662	-68.9697	-62.2559	-54.3213	-53.1006	-51.8799	-55.542	-53.7109
73.5	-67.749	-67.1387	-61.6455	-73.2422	-68.9697	-66.5283	-67.749	-53.7109	-61.6455	-57.9834	-49.4385	-51.2695	-60.4248
73.6	-67.1387	-75.0732	-60.4248	-74.4629	-70.8008	-64.6973	-71.4111	-61.0352	-65.3076	-54.3213	-55.542	-47.6074	-51.8799
73.7	-71.4111	-72.6318	-68.3594	-72.0215	-75.0732	-62.2559	-67.1387	-57.9834	-62.2559	-54.9316	-53.1006	-45.166	-53.7109
73.8	-67.1387	-72.0215	-67.1387	-72.0215	-75.6836	-64.6973	-63.4766	-53.1006	-57.9834	-57.9834	-52.4902	-54.3213	-50.6592
73.9	-78.125	-70.8008	-65.918	-67.749	-70.8008	-61.0352	-64.6973	-57.9834	-57.9834	-53.1006	-52.4902	-50.6592	-49.4385
74	-71.4111	-73.2422	-66.5283	-68.9697	-75.0732	-70.8008	-64.0869	-68.9697	-58.5938	-54.3213	-51.2695	-54.3213	-56.1523
74.1	-69.5801	-71.4111	-62.8662	-68.9697	-67.749	-68.3594	-64.0869	-60.4248	-56.7627	-55.542	-51.8799	-54.3213	-56.7627
74.2	-68.9697	-72.6318	-64.6973	-70.1904	-70.8008	-60.4248	-64.6973	-57.373	-60.4248	-57.373	-60.4248	-57.373	-46.9971
74.3	-70.1904	-72.6318	-66.5283	-67.749	-70.8008	-67.749	-65.918	-56.7627	-61.6455	-52.4902	-53.7109	-50.6592	-45.7764
74.4	-67.749	-73.2422	-63.4766	-68.3594	-65.3076	-64.0869	-64.6973	-61.6455	-56.1523	-57.9834	-54.9316	-53.7109	-59.8145
74.5	-70.1904	-67.749	-62.2559	-69.5801	-68.3594	-64.6973	-69.5801	-69.5801	-59.8145	-59.8145	-53.7109	-56.7627	-50.0488
74.6	-74.4629	-63.4766	-59.8145	-62.8662	-70.1904	-67.1387	-72.6318	-63.4766	-54.9316	-55.542	-48.8281	-53.1006	-55.542
74.7	-69.5801	-68.3594	-64.0869	-70.8008	-65.918	-64.0869	-65.918	-62.8662	-59.2041	-52.4902	-51.2695	-54.9316	-50.0488
74.8	-68.3594	-70.8008	-67.749	-69.5801	-65.918	-68.3594	-64.0869	-57.373	-56.7627	-59.2041	-48.8281	-56.7627	-53.1006
74.9	-67.749	-72.6318	-68.3594	-74.4629	-65.3076	-64.0869	-67.749	-63.4766	-53.1006	-55.542	-48.2178	-59.2041	-55.542
75	-73.8525	-68.3594	-65.918	-62.8662	-67.749	-68.3594	-64.0869	-67.1387	-57.373	-61.0352	-54.3213	-53.1006	-50.6592
75.1	-68.3594	-76.2939	-68.3594	-72.0215	-68.3594	-67.749	-65.3076	-58.5938	-55.542	-61.0352	-51.8799	-51.2695	-54.3213
75.2	-75.0732	-73.8525	-62.8662	-68.9697	-67.749	-68.9697	-67.1387	-53.1006	-57.373	-56.7627	-53.7109	-56.1523	-60.4248
75.3	-78.7354	-70.1904	-67.749	-68.3594	-67.749	-62.8662	-68.3594	-61.0352	-58.5938	-58.5938	-46.3867	-54.3213	-47.6074
75.4	-71.4111	-70.8008	-61.6455	-64.6973	-65.918	-64.0869	-70.1904	-61.6455	-60.4248	-56.1523	-55.542	-57.373	-53.1006
75.5	-68.9697	-68.9697	-66.5283	-69.5801	-67.749	-65.918	-64.6973	-61.0352	-55.542	-62.8662	-49.4385	-53.7109	-49.4385
75.6	-70.8008	-62.8662	-68.9697	-62.8662	-68.3594	-65.3076	-62.2559	-61.6455	-61.6455	-53.7109	-56.1523	-54.9316	-51.2695
75.7	-67.1387	-74.4629	-58.5938	-71.4111	-69.5801	-62.2559	-62.2559	-62.8662	-58.5938	-62.2559	-55.542	-54.3213	-56.7627
75.8	-72.0215	-75.6836	-67.749	-67.749	-66.5283	-70.8008	-63.4766	-67.749	-52.4902	-60.4248	-53.1006	-53.7109	-50.0488
75.9	-75.0732	-71.4111	-61.0352	-72.6318	-70.1904	-67.749	-66.5283	-58.5938	-61.0352	-58.5938	-50.0488	-52.4902	-51.2695
76	-76.2939	-65.918	-68.9697	-69.5801	-64.0869	-65.918	-72.0215	-64.0869	-57.9834	-51.8799	-52.4902	-48.2178	-56.1523
76.1	-75.0732	-74.4629	-66.5283	-66.5283	-62.2559	-64.6973	-70.8008	-53.7109	-58.5938	-48.8281	-57.9834	-55.542	-53.7109
76.2	-68.9697	-67.749	-67.1387	-73.2422	-71.4111	-62.8662	-68.3594	-63.4766	-54.9316	-52.4902	-52.4902	-52.4902	-50.0488
76.3	-70.1904	-68.9697	-64.0869	-74.4629	-70.1904	-65.918	-68.9697	-58.5938	-57.9834	-55.542	-48.2178	-49.4385	-47.6074
76.4	-68.9697	-71.4111	-61.0352	-67.749	-67.1387	-67.1387	-65.918	-63.4766	-62.2559	-55.542	-54.3213	-56.1523	-43.335
76.5	-73.2422	-75.0732	-65.3076	-65.918	-65.918	-63.4766	-65.918	-62.2559	-58.5938	-54.9316	-51.2695	-51.8799	-51.2695
76.6	-71.4111	-75.0732	-68.3594	-70.8008	-59.8145	-68.3594	-67.749	-63.4766	-58.5938	-52.4902	-54.9316	-48.2178	-51.2695
76.7	-67.1387	-65.918	-61.6455	-75.0732	-64.0869	-65.3076	-66.5283	-59.8145	-56.7627	-53.1006	-56.1523	-53.1006	-51.2695
76.8	-70.8008	-73.2422	-67.749	-69.5801	-65.3076	-64.6973	-68.3594	-66.5283	-61.6455	-57.9834	-53.1006	-56.1523	-46.9971
76.9	-72.0215	-73.2422	-62.8662	-73.2422	-72.6318	-67.1387	-64.6973	-67.1387	-57.9834	-57.373	-54.3213	-48.8281	-49.4385
77	-71.4111	-76.9043	-64.6973	-72.6318	-70.8008	-73.8525	-60.4248	-57.9834	-62.2559	-63.4766	-55.542	-51.2695	-48.8281
77.1	-71.4111	-73.2422	-64.6973	-66.5283	-67.1387	-66.5283	-62.2559	-61.0352	-57.373	-59.2041	-56.1523	-51.8799	-49.4385
77.2	-68.3594	-68.3594	-61.0352	-70.8008	-64.0869	-70.1904	-66.5283	-62.8662	-60.4248	-53.1006	-51.8799	-47.6074	-50.0488
77.3	-75.0732	-73.2422	-62.2559	-70.1904	-69.5801	-65.3076	-65.3076	-65.3076	-60.4248	-56.7627	-57.373	-48.8281	-50.6592
77.4	-70.8008	-74.4629	-69.5801	-67.1387	-68.3594	-67.749	-67.1387	-58.5938	-65.3076	-60.4248	-42.1143	-44.5557	-51.2695
77.5	-69.5801	-73.8525	-59.8145	-67.749	-65.918	-67.1387	-66.5283	-58.5938	-57.373	-56.1523	-53.1006	-48.2178	-51.2695
77.6	-68.9697	-70.8008	-64.6973	-62.2559	-71.4111	-68.3594	-72.0215	-59.2041	-56.7627	-51.8799	-50.6592	-46.3867	-56.1523
77.7	-70.8008	-78.7354	-61.0352	-68.9697	-64.0869	-67.1387	-71.4111	-64.6973	-57.373	-57.373	-54.3213	-53.1006	-53.1006
77.8	-69.5801	-65.918	-72.0215	-67.749	-70.1904	-67.1387	-68.9697	-58.5938	-60.4248	-60.4248	-51.8799	-56.7627	-51.8799
77.9	-73.8525	-75.0732	-66.5283	-62.2559	-73.2422	-66.5283	-68.9697	-59.8145	-62.8662	-53.1006	-53.7109	-51.2695	-53.1006
78	-75.0732	-69.5801	-57.9834	-69.5801	-69.5801	-64.6973	-63.4766	-57.9834	-58.5938	-55.542	-48.2178	-47.6074	-50.6592
78.1	-70.8008	-75.6836	-56.1523	-69.5801	-67.1387	-70.1904	-72.0215	-60.4248	-61.0352	-65.3076	-46.3867	-46.3867	-51.2695
78.2	-64.6973	-73.2422	-64.6973	-65.3076	-65.3076	-71.4111	-67.1387	-61.0352	-57.373	-47.6074	-48.8281	-51.8799	-56.7627
78.3	-74.4629	-74.4629	-66.5283	-65.3076	-68.9697	-59.8145	-65.3076	-64.6973	-62.8662	-53.1006	-53.7109	-53.1006	-59.8145
78.4	-75.0732	-70.1904	-65.3076	-64.6973	-70.8008	-67.749	-61.6455	-64.0869	-54.9316	-55.542	-50.6592	-53.1006	-51.2695
78.5	-71.4111	-73.2422	-62.8662	-64.6973	-73.2422	-65.3076	-66.5283	-67.749	-57.9834	-59.2041	-52.4902	-57.373	-48.2178
78.6	-72.0215	-71.4111	-64.6973	-63.4766	-72.0215	-67.1387	-66.5283	-59.8145	-61.0352	-64.0869	-48.8281	-52.4902	-40.8936
78.7	-73.2422	-76.2939	-58.5938	-65.3076	-65.3076	-65.3076	-64.0869	-56.7627	-65.918	-61.6455	-54.9316	-55.542	-52.4902
78.8	-71.4111	-67.1387	-67.749	-67.1387	-71.4111	-65.3076	-68.3594	-64.6973	-59.2041	-53.1006	-43.335	-57.373	-48.2178
78.9	-68.3594	-72.6318	-64.0869	-65.3076	-72.0215	-70.8008	-63.4766	-65.3076	-59.2041	-60.4248	-60.4248	-51.2695	-46.3867
79	-70.8008	-72.0215	-65.3076	-65.3076	-68.9697	-65.3076	-62.8662	-62.8662	-59.8145	-61.6455	-56.7627	-49.4385	-55.542
79.1	-72.0215	-75.0732	-59.2041	-64.6973	-69.5801	-70.8008	-65.918	-61.6455	-62.8662	-60.4248	-53.1006	-47.6074	-55.542
79.2	-74.4629	-75.6836	-62.2559	-70.8008	-62.8662	-68.3594	-64.0869	-59.8145	-65.3076	-55.542	-50.6592	-57.373	-56.7627
79.3	-71.4111	-73.8525	-68.3594	-67.1387	-70.8008	-72.0215	-62.8662	-58.5938	-58.5938	-59.2041	-50.0488	-48.8281	-51.2695
79.4	-70.1904	-67.1387	-65.3076	-62.8662	-76.9043	-70.8008	-75.0732	-62.2559	-55.542	-57.373	-57.9834	-51.8799	-45.166
79.5	-73.2422	-64.6973	-70.1904	-68.3594	-69.5801	-66.5283	-70.1904	-62.2559	-57.373	-59.8145	-56.1523	-48.8281	-51.2695
79.6	-72.0215	-73.2422	-64.0869	-76.9043	-65.3076	-71.4111	-65.3076	-65.3076	-59.2041	-66.5283	-52.4902	-52.4902	-50.6592
79.7	-73.8525	-62.8662	-66.5283	-66.5283	-66.5283	-70.8008	-65.3076	-61.6455	-59.2041	-53.7109	-54.3213	-48.2178	-42.1143
79.8	-73.8525	-68.3594	-63.4766	-68.3594	-67.749	-65.918	-69.5801	-59.8145	-59.8145	-59.2041	-49.4385	-51.2695	-53.7109
79.9	-65.3076	-73.8525	-70.1904	-70.8008	-69.5801	-75.6836	-67.1387	-70.1904	-53.1006	-57.373	-48.8281	-50.0488	-50.0488
80	-68.9697	-71.4111	-62.2559	-64.0869	-70.8008	-72.0215	-64.0869	-62.2559	-59.2041	-56.7627	-53.1006	-45.166	-50.0488
80.1	-74.4629	-75.6836	-57.9834	-69.5801	-72.6318	-66.5283	-58.5938	-67.749	-60.4248	-64.0869	-51.2695	-48.8281	-56.1523
80.2	-68.9697	6.71387	57.373	34.1797	-19.5312	-12.8174	122.07	150.757	433.96	581.055	612.183	676.88	505.371
80.3	-71.4111	-10.9863	35.4004	46.3867	17.7002	48.2178	143.433	153.809	151.367	186.768	188.599	174.561	34.1797
80.4	-76.2939	-36.0107	-4.88281	8.54492	1.83105	23.1934	94.6045	108.032	112.915	159.912	156.25	175.781	109.253
80.5	-67.749	-45.166	-18.9209	-7.32422	10.9863	26.8555	74.4629	97.0459	112.915	161.133	167.847	205.078	190.43
80.6	-73.8525	-50.6592	-31.1279	-11.5967	18.9209	36.0107	59.8145	101.929	125.732	173.95	177.002	217.896	235.596
80.7	-67.749	-59.8145	-39.0625	-17.0898	17.7002	36.6211	56.1523	99.4873	129.395	167.236	186.768	215.454	234.985
80.8	-70.1904	-64.6973	-42.7246	-15.8691	18.9209	42.1143	48.2178	90.332	123.901	153.198	160.522	167.847	209.351
80.9	-72.0215	-62.8662	-39.0625	-16.4795	17.0898	34.79	43.9453	79.9561	104.98	126.343	112.915	120.85	148.315
81	-68.3594	-59.8145	-48.2178	-18.9209	11.5967	29.2969	43.335	76.9043	89.1113	83.6182	61.0352	58.5938	103.149
81.1	-65.918	-61.0352	-39.0625	-19.5312	7.93457	28.0762	32.959	62.2559	63.4766	42.7246	12.8174	13.4277	70.1904
81.2	-65.3076	-60.4248	-40.2832	-28.6865	3.66211	21.9727	31.7383	46.3867	37.8418	-3.05176	-40.2832	-21.3623	48.2178
81.3	-74.4629	-65.3076	-39.0625	-25.0244	2.44141	14.0381	21.3623	35.4004	6.71387	-43.335	-68.9697	-36.0107	35.4004
81.4	-74.4629	-56.1523	-40.8936	-29.2969	-3.05176	12.8174	10.376	19.5312	-21.3623	-82.3975	-91.5527	-42.7246	30.5176
81.5	-68.3594	-58.5938	-47.6074	-23.1934	-6.71387	4.27246	15.2588	4.27246	-53.7109	-107.422	-100.708	-42.7246	43.335
81.6	-70.8008	-64.6973	-42.7246	-26.8555	1.83105	7.32422	7.32422	-12.8174	-79.9561	-117.798	-104.37	-39.0625	36.0107
81.7	-69.5801	-63.4766	-45.166	-28.6865	-12.8174	6.71387	4.88281	-23.1934	-100.098	-136.108	-101.318	-28.6865	45.166
81.8	-72.0215	-58.5938	-46.3867	-31.1279	-20.1416	-6.10352	-0.610352	-34.1797	-117.798	-131.836	-95.8252	-18.9209	48.8281
81.9	-70.1904	-68.3594	-38.4521	-23.1934	-12.8174	-10.376	-0.610352	-53.1006	-142.822	-131.836	-85.4492	-12.8174	54.9316
82	-70.8008	-62.2559	-38.4521	-31.7383	-15.2588	-8.54492	-17.0898	-60.4248	-142.212	-134.277	-66.5283	2.44141	57.373
82.1	-67.1387	-62.2559	-39.0625	-28.6865	-18.3105	-10.9863	-24.4141	-67.1387	-144.043	-127.563	-62.2559	10.9863	70.1904
82.2	-72.6318	-63.4766	-45.7764	-34.1797	-20.752	-9.76562	-18.9209	-69.5801	-142.822	-121.46	-46.3867	8.54492	65.3076
82.3	-71.4111	-64.6973	-40.8936	-32.3486	-17.7002	-11.5967	-25.6348	-83.0078	-146.484	-100.708	-39.0625	25.0244	64.6973
82.4	-74.4629	-67.1387	-40.8936	-36.6211	-25.0244	-20.1416	-19.5312	-83.0078	-143.433	-95.2148	-27.4658	26.8555	59.2041
82.5	-71.4111	-64.0869	-52.4902	-31.7383	-14.0381	-19.5312	-33.5693	-82.3975	-134.277	-86.6699	-17.7002	26.2451	67.749
82.6	-69.5801	-62.8662	-46.3867	-31.7383	-24.4141	-15.8691	-21.3623	-89.7217	-126.343	-79.3457	-12.8174	20.1416	64.0869
82.7	-74.4629	-64.6973	-46.3867	-38.4521	-26.8555	-20.752	-26.8555	-85.4492	-115.967	-72.0215	-10.9863	38.4521	63.4766
82.8	-67.1387	-64.0869	-51.8799	-36.6211	-21.3623	-21.3623	-34.79	-87.8906	-107.422	-67.1387	-6.10352	34.79	66.5283
82.9	-73.2422	-55.542	-45.7764	-36.0107	-23.8037	-16.4795	-33.5693	-90.9424	-107.422	-57.9834	-3.05176	31.1279	65.918
83	-71.4111	-61.6455	-50.0488	-35.4004	-25.0244	-19.5312	-28.0762	-92.7734	-100.708	-54.3213	6.71387	32.3486	63.4766
83.1	-65.3076	-61.6455	-42.7246	-34.79	-28.6865	-25.0244	-38.4521	-93.9941	-87.2803	-46.3867	6.10352	33.5693	64.6973
83.2	-73.8525	-63.4766	-48.2178	-41.5039	-30.5176	-25.6348	-29.2969	-89.7217	-81.1768	-43.335	4.27246	41.5039	62.8662
83.3	-68.3594	-63.4766	-47.6074	-36.0107	-20.752	-27.4658	-34.1797	-89.7217	-81.7871	-37.2314	7.32422	37.8418	65.918
83.4	-69.5801	-64.6973	-52.4902	-35.4004	-34.79	-28.0762	-42.7246	-84.2285	-72.0215	-27.4658	9.76562	38.4521	62.8662
83.5	-71.4111	-65.918	-49.4385	-39.6729	-28.6865	-24.4141	-42.1143	-82.3975	-67.1387	-28.6865	9.76562	34.79	57.9834
83.6	-68.3594	-64.6973	-45.166	-40.8936	-29.9072	-25.6348	-41.5039	-84.2285	-65.918	-26.8555	10.376	34.79	58.5938
83.7	-74.4629	-61.6455	-46.9971	-38.4521	-35.4004	-26.8555	-43.335	-78.125	-54.9316	-31.1279	10.376	37.8418	61.6455
83.8	-74.4629	-65.3076	-45.166	-40.2832	-25.6348	-28.6865	-38.4521	-75.0732	-54.3213	-18.9209	12.8174	33.5693	57.373
83.9	-70.1904	-60.4248	-45.166	-43.9453	-33.5693	-31.1279	-42.7246	-72.6318	-49.4385	-17.7002	10.376	38.4521	61.0352
84	-70.8008	-62.8662	-45.7764	-40.8936	-33.5693	-29.9072	-39.0625	-78.7354	-45.166	-20.752	16.4795	31.1279	61.6455
84.1	-64.6973	-70.8008	-42.1143	-40.8936	-36.0107	-26.8555	-36.0107	-72.6318	-39.6729	-18.3105	14.6484	32.3486	59.2041
84.2	-72.0215	-61.0352	-50.6592	-45.7764	-33.5693	-23.8037	-31.7383	-68.3594	-41.5039	-12.8174	14.0381	36.0107	58.5938
84.3	-65.918	-64.0869	-50.6592	-36.6211	-37.2314	-29.2969	-38.4521	-64.0869	-36.0107	-17.7002	11.5967	37.2314	62.8662
84.4	-65.918	-61.6455	-47.6074	-40.8936	-26.8555	-28.0762	-36.6211	-58.5938	-31.1279	-11.5967	17.0898	36.0107	61.0352
84.5	-70.1904	-64.6973	-50.0488	-41.5039	-33.5693	-22.583	-41.5039	-68.9697	-26.8555	-6.71387	17.7002	37.8418	59.2041
84.6	-68.9697	-66.5283	-45.166	-45.166	-32.959	-32.959	-34.79	-65.918	-33.5693	-4.27246	19.5312	35.4004	59.8145
84.7	-73.8525	-70.8008	-46.9971	-45.166	-36.6211	-26.2451	-39.0625	-65.3076	-34.79	-8.54492	17.7002	36.0107	61.0352
84.8	-69.5801	-62.2559	-47.6074	-45.7764	-31.1279	-35.4004	-40.8936	-60.4248	-37.2314	-4.88281	12.207	31.7383	49.4385
84.9	-70.8008	-61.6455	-40.2832	-43.9453	-34.1797	-29.9072	-26.2451	-59.8145	-29.2969	-7.93457	14.6484	37.2314	56.1523
85	-71.4111	-68.3594	-43.9453	-46.3867	-34.79	-31.7383	-34.79	-59.2041	-28.0762	-6.71387	17.0898	37.8418	63.4766
85.1	-76.2939	-62.8662	-45.7764	-45.7764	-36.0107	-32.959	-37.2314	-56.7627	-23.1934	-10.9863	10.376	28.6865	59.8145
85.2	-73.8525	-64.0869	-48.8281	-49.4385	-34.1797	-34.1797	-29.9072	-56.1523	-28.6865	-1.2207	20.752	36.6211	52.4902
85.3	-67.1387	-69.5801	-48.8281	-47.6074	-35.4004	-36.6211	-32.3486	-54.3213	-28.6865	3.05176	17.7002	34.79	54.3213
85.4	-70.8008	-60.4248	-45.7764	-42.1143	-40.2832	-36.0107	-34.1797	-50.0488	-24.4141	-3.05176	19.5312	41.5039	60.4248
85.5	-68.3594	-64.0869	-46.9971	-43.9453	-37.8418	-30.5176	-34.1797	-47.6074	-22.583	0	10.9863	33.5693	53.1006
85.6	-74.4629	-65.3076	-43.9453	-43.335	-32.959	-31.1279	-31.7383	-46.9971	-26.2451	-0.610352	22.583	32.3486	57.373
85.7	-66.5283	-67.1387	-51.2695	-40.8936	-32.959	-32.3486	-34.79	-42.1143	-26.8555	-5.49316	16.4795	37.2314	50.0488
85.8	-69.5801	-64.0869	-45.166	-42.7246	-37.8418	-26.2451	-33.5693	-44.5557	-28.6865	-3.05176	14.6484	33.5693	50.6592
85.9	-65.918	-64.6973	-53.7109	-45.166	-37.8418	-38.4521	-31.1279	-45.7764	-30.5176	-0.610352	18.9209	31.1279	57.373
86	-74.4629	-62.8662	-46.9971	-43.9453	-40.8936	-37.2314	-36.0107	-43.9453	-23.8037	-6.10352	14.6484	34.79	58.5938
86.1	-70.8008	-61.6455	-46.3867	-45.7764	-36.6211	-32.3486	-34.1797	-51.8799	-30.5176	1.2207	17.0898	31.1279	54.3213
86.2	-68.9697	-71.4111	-46.3867	-48.2178	-35.4004	-35.4004	-31.7383	-39.0625	-24.4141	7.32422	17.0898	34.1797	59.8145
86.3	-75.6836	-68.9697	-46.9971	-42.7246	-36.0107	-29.9072	-35.4004	-40.2832	-25.6348	-0.610352	13.4277	37.8418	51.2695
86.4	-68.9697	-64.6973	-45.166	-40.8936	-36.6211	-34.79	-33.5693	-45.7764	-25.0244	7.93457	10.376	34.1797	56.7627
86.5	-67.749	-67.749	-43.335	-42.1143	-29.2969	-31.7383	-36.0107	-39.6729	-18.3105	-0.610352	16.4795	37.8418	56.7627
86.6	-67.749	-64.6973	-51.8799	-49.4385	-37.8418	-39.0625	-37.8418	-43.9453	-26.8555	1.2207	14.0381	28.6865	52.4902
86.7	-69.5801	-59.8145	-49.4385	-44.5557	-33.5693	-35.4004	-35.4004	-45.7764	-19.5312	11.5967	17.7002	34.1797	56.7627
86.8	-68.9697	-62.2559	-46.9971	-49.4385	-34.79	-34.1797	-35.4004	-49.4385	-29.9072	-2.44141	10.376	28.6865	50.6592
86.9	-71.4111	-65.3076	-50.6592	-45.166	-32.959	-36.6211	-32.959	-53.7109	-25.0244	4.27246	20.1416	40.2832	53.7109
87	-71.4111	-65.918	-51.2695	-43.9453	-37.2314	-36.6211	-33.5693	-51.2695	-28.6865	7.32422	20.752	36.0107	48.2178
87.1	-70.1904	-64.0869	-53.1006	-42.1143	-34.79	-34.1797	-30.5176	-48.8281	-20.1416	0.610352	12.8174	32.959	57.9834
87.2	-70.1904	-61.6455	-46.3867	-48.8281	-43.335	-40.8936	-34.1797	-49.4385	-23.8037	-0.610352	13.4277	34.1797	56.1523
87.3	-64.6973	-64.6973	-45.166	-46.9971	-36.0107	-32.3486	-32.3486	-43.335	-22.583	3.66211	15.8691	30.5176	57.373
87.4	-72.6318	-60.4248	-54.3213	-48.2178	-38.4521	-31.7383	-36.6211	-38.4521	-20.1416	4.27246	17.7002	37.8418	59.8145
87.5	-68.3594	-60.4248	-51.2695	-39.0625	-34.1797	-36.6211	-34.79	-39.0625	-21.3623	-0.610352	16.4795	30.5176	56.1523
87.6	-75.0732	-57.9834	-45.7764	-43.9453	-37.8418	-31.1279	-28.6865	-42.1143	-20.752	0	13.4277	28.0762	59.2041
87.7	-76.9043	-65.3076	-46.9971	-44.5557	-33.5693	-36.6211	-36.0107	-35.4004	-27.4658	10.376	15.8691	34.79	52.4902
87.8	-65.918	-61.0352	-50.6592	-43.9453	-40.8936	-38.4521	-39.0625	-35.4004	-20.752	8.54492	17.7002	34.79	50.0488
87.9	-75.6836	-62.8662	-46.9971	-39.0625	-37.8418	-40.2832	-32.959	-29.9072	-21.3623	1.83105	15.8691	34.79	56.1523
88	-61.0352	-61.0352	-56.7627	-48.8281	-39.6729	-41.5039	-31.1279	-32.3486	-21.9727	3.66211	21.9727	26.8555	56.1523
88.1	-75.6836	-62.8662	-49.4385	-53.7109	-35.4004	-35.4004	-29.2969	-37.2314	-18.3105	2.44141	17.0898	31.1279	60.4248
88.2	-69.5801	-65.918	-56.1523	-51.8799	-35.4004	-34.1797	-28.0762	-36.0107	-19.5312	4.88281	14.6484	33.5693	57.373
88.3	-74.4629	-63.4766	-52.4902	-48.8281	-38.4521	-26.8555	-27.4658	-40.8936	-15.8691	-1.2207	20.1416	36.6211	58.5938
88.4	-63.4766	-62.2559	-46.3867	-45.7764	-41.5039	-31.1279	-30.5176	-40.8936	-18.9209	4.88281	21.3623	29.9072	55.542
88.5	-73.2422	-69.5801	-52.4902	-43.335	-32.959	-36.0107	-33.5693	-37.2314	-12.8174	-0.610352	19.5312	35.4004	54.9316
88.6	-72.0215	-59.2041	-49.4385	-45.7764	-36.6211	-29.2969	-37.2314	-37.8418	-14.0381	3.05176	21.9727	38.4521	56.7627
88.7	-69.5801	-65.918	-53.7109	-46.9971	-39.0625	-37.2314	-36.6211	-36.6211	-20.1416	7.93457	20.752	36.6211	57.373
88.8	-73.8525	-62.8662	-48.8281	-50.6592	-40.2832	-37.2314	-34.1797	-40.2832	-13.4277	3.05176	24.4141	34.79	62.8662
88.9	-68.9697	-57.373	-51.2695	-39.0625	-38.4521	-38.4521	-34.1797	-37.8418	-18.3105	3.66211	20.752	36.6211	54.3213
89	-62.8662	-58.5938	-46.9971	-46.3867	-38.4521	-37.8418	-31.1279	-37.8418	-14.0381	0.610352	15.2588	34.79	53.1006
89.1	-68.3594	-65.3076	-54.9316	-48.8281	-41.5039	-37.8418	-37.2314	-40.8936	-5.49316	2.44141	17.7002	32.959	54.9316
89.2	-65.918	-56.7627	-51.2695	-44.5557	-39.6729	-34.79	-35.4004	-35.4004	-21.3623	9.76562	21.3623	35.4004	61.6455
89.3	-64.6973	-59.8145	-46.3867	-44.5557	-37.2314	-36.0107	-43.335	-34.1797	-13.4277	-0.610352	14.6484	29.9072	64.6973
89.4	-69.5801	-65.3076	-48.2178	-46.9971	-37.2314	-37.2314	-30.5176	-29.9072	-14.6484	6.10352	20.752	32.3486	56.1523
89.5	-67.1387	-62.8662	-51.2695	-50.6592	-36.0107	-42.1143	-39.0625	-28.6865	-10.376	8.54492	20.752	34.79	57.9834
89.6	-72.0215	-60.4248	-46.3867	-46.9971	-34.1797	-26.8555	-39.0625	-34.1797	-14.0381	3.05176	22.583	34.1797	55.542
89.7	-70.8008	-63.4766	-47.6074	-44.5557	-38.4521	-40.8936	-31.1279	-25.6348	-13.4277	1.83105	21.9727	36.6211	59.8145
89.8	-64.6973	-58.5938	-53.1006	-45.7764	-35.4004	-31.7383	-33.5693	-27.4658	-9.15527	10.9863	23.8037	31.1279	59.2041
89.9	-68.9697	-65.918	-51.8799	-41.5039	-39.6729	-29.9072	-36.0107	-28.0762	-13.4277	8.54492	18.9209	37.8418	61.0352
90	-71.4111	-65.3076	-43.9453	-47.6074	-41.5039	-32.959	-37.8418	-26.8555	-9.76562	11.5967	21.9727	39.0625	59.8145
90.1	-63.4766	-60.4248	-50.6592	-45.166	-40.2832	-36.0107	-36.0107	-32.3486	-10.376	0	24.4141	34.79	64.6973
90.2	-71.4111	-56.1523	-51.2695	-44.5557	-37.2314	-35.4004	-35.4004	-26.8555	-12.207	3.66211	18.9209	29.2969	56.7627
90.3	-70.8008	-66.5283	-48.2178	-49.4385	-37.8418	-33.5693	-37.8418	-29.9072	-10.376	7.32422	17.0898	32.959	59.2041
90.4	-66.5283	-63.4766	-51.8799	-49.4385	-41.5039	-34.79	-34.1797	-31.1279	-9.76562	9.15527	24.4141	37.2314	55.542
90.5	-68.3594	-61.0352	-50.0488	-48.2178	-37.2314	-34.1797	-39.0625	-21.9727	-5.49316	8.54492	17.0898	37.2314	61.6455
90.6	-72.0215	-65.3076	-45.166	-43.9453	-34.79	-37.2314	-31.7383	-29.2969	-5.49316	6.10352	18.9209	35.4004	60.4248
90.7	-59.2041	-64.6973	-47.6074	-40.8936	-34.1797	-35.4004	-28.6865	-28.0762	-7.32422	7.93457	18.3105	41.5039	59.8145
90.8	-73.2422	-58.5938	-49.4385	-44.5557	-37.8418	-34.79	-32.3486	-21.3623	-12.207	7.93457	15.2588	40.8936	56.1523
90.9	-76.9043	-62.8662	-55.542	-41.5039	-39.0625	-41.5039	-37.2314	-22.583	-5.49316	12.207	21.9727	39.6729	61.6455
91	-70.8008	-55.542	-51.2695	-45.166	-34.79	-37.8418	-29.9072	-25.6348	-9.15527	10.376	20.1416	36.6211	55.542
91.1	-71.4111	-62.2559	-47.6074	-39.0625	-38.4521	-31.7383	-37.2314	-18.9209	-6.10352	7.93457	25.0244	32.3486	57.373
91.2	-73.2422	-56.7627	-48.8281	-50.0488	-38.4521	-33.5693	-36.6211	-23.8037	-9.15527	12.207	16.4795	34.79	55.542
91.3	-70.1904	-53.7109	-50.0488	-42.1143	-35.4004	-34.79	-34.79	-25.6348	-14.0381	7.93457	21.3623	39.6729	59.2041
91.4	-72.0215	-62.8662	-47.6074	-39.6729	-39.0625	-35.4004	-30.5176	-21.3623	-13.4277	6.71387	11.5967	38.4521	63.4766
91.5	-71.4111	-61.0352	-52.4902	-43.9453	-39.6729	-39.0625	-31.7383	-22.583	-7.32422	3.66211	15.2588	37.2314	61.6455
91.6	-65.3076	-58.5938	-50.0488	-39.0625	-32.3486	-31.7383	-34.1797	-25.0244	-2.44141	7.32422	19.5312	36.0107	58.5938
91.7	-68.9697	-64.0869	-52.4902	-41.5039	-31.7383	-38.4521	-29.2969	-20.752	-3.05176	4.88281	18.3105	45.166	56.7627
91.8	-76.9043	-70.8008	-52.4902	-45.7764	-39.0625	-32.959	-35.4004	-20.752	-12.8174	14.6484	15.8691	36.0107	55.542
91.9	-68.3594	-60.4248	-48.8281	-50.6592	-38.4521	-40.8936	-42.7246	-24.4141	-12.8174	9.76562	17.7002	34.79	57.9834
92	-70.8008	-66.5283	-56.1523	-42.1143	-36.6211	-38.4521	-33.5693	-18.3105	-6.71387	3.66211	18.3105	41.5039	64.0869
92.1	-73.8525	-59.8145	-49.4385	-45.7764	-36.0107	-38.4521	-37.2314	-19.5312	-7.93457	9.76562	21.3623	44.5557	58.5938
92.2	-73.2422	-61.6455	-52.4902	-47.6074	-39.0625	-34.79	-29.9072	-20.1416	-17.0898	6.10352	20.752	39.6729	59.2041
92.3	-70.1904	-57.373	-52.4902	-37.8418	-39.0625	-28.6865	-36.0107	-26.2451	-7.32422	13.4277	18.3105	40.8936	56.7627
92.4	-73.8525	-70.1904	-49.4385	-44.5557	-34.1797	-32.959	-33.5693	-24.4141	-9.15527	3.66211	21.9727	39.0625	58.5938
92.5	-71.4111	-66.5283	-47.6074	-47.6074	-40.8936	-40.8936	-35.4004	-30.5176	-9.76562	9.15527	21.9727	42.7246	63.4766
92.6	-75.0732	-64.0869	-51.2695	-39.0625	-36.6211	-36.6211	-34.79	-18.9209	-10.376	5.49316	23.1934	47.6074	59.8145
92.7	-72.6318	-57.373	-51.8799	-36.6211	-38.4521	-38.4521	-36.6211	-21.9727	-10.9863	12.8174	19.5312	42.1143	66.5283
92.8	-74.4629	-62.2559	-53.7109	-47.6074	-38.4521	-36.0107	-33.5693	-16.4795	-6.71387	7.32422	21.9727	40.8936	67.1387
92.9	-72.6318	-70.1904	-56.7627	-47.6074	-34.79	-36.0107	-37.2314	-17.0898	-11.5967	1.2207	21.3623	46.9971	61.6455
93	-73.8525	-68.3594	-46.3867	-43.9453	-40.8936	-31.7383	-32.3486	-18.3105	-4.27246	14.0381	21.3623	44.5557	69.5801
93.1	-70.1904	-67.749	-55.542	-46.3867	-33.5693	-40.8936	-34.1797	-17.7002	-10.9863	14.0381	16.4795	46.3867	69.5801
93.2	-72.6318	-64.6973	-50.6592	-40.8936	-43.335	-32.959	-34.79	-20.752	-9.76562	9.15527	26.2451	47.6074	67.1387
93.3	-68.3594	-61.0352	-57.9834	-43.335	-32.959	-36.6211	-31.7383	-23.8037	-12.207	7.32422	23.1934	47.6074	65.3076
93.4	-70.8008	-56.1523	-53.7109	-43.9453	-43.335	-37.2314	-31.1279	-25.6348	-4.88281	5.49316	19.5312	48.2178	62.2559
93.5	-70.8008	-68.9697	-55.542	-44.5557	-36.6211	-33.5693	-34.1797	-25.6348	-17.0898	4.88281	23.1934	45.166	68.9697
93.6	-72.6318	-65.918	-53.7109	-44.5557	-39.0625	-32.3486	-34.1797	-18.9209	-7.93457	4.88281	25.0244	46.9971	75.0732
93.7	-72.6318	-59.2041	-50.0488	-41.5039	-38.4521	-25.0244	-31.7383	-25.0244	-8.54492	6.10352	18.9209	47.6074	65.3076
93.8	-70.1904	-65.918	-51.2695	-39.0625	-39.6729	-31.1279	-32.959	-23.8037	-7.93457	9.76562	25.0244	48.8281	65.3076
93.9	-72.6318	-68.9697	-51.8799	-46.9971	-33.5693	-33.5693	-28.6865	-26.8555	-6.71387	9.76562	25.6348	53.7109	71.4111
94	-67.749	-56.7627	-54.3213	-46.3867	-36.0107	-36.6211	-29.9072	-29.9072	-9.76562	7.93457	16.4795	42.7246	67.749
94.1	-65.918	-65.3076	-53.1006	-48.2178	-37.8418	-37.8418	-31.7383	-17.0898	-11.5967	2.44141	27.4658	48.8281	72.6318
94.2	-68.9697	-62.8662	-54.9316	-45.7764	-33.5693	-36.6211	-31.7383	-19.5312	-8.54492	10.9863	21.3623	46.3867	67.1387
94.3	-70.8008	-64.0869	-58.5938	-41.5039	-37.2314	-31.7383	-37.8418	-17.0898	-6.10352	8.54492	20.1416	50.0488	70.1904
94.4	-72.6318	-63.4766	-48.2178	-45.166	-39.0625	-36.6211	-32.3486	-23.1934	-9.15527	5.49316	23.1934	50.0488	71.4111
94.5	-70.1904	-63.4766	-51.8799	-50.6592	-34.1797	-32.3486	-33.5693	-23.1934	-9.76562	0.610352	26.8555	51.2695	69.5801
94.6	-70.8008	-59.8145	-51.8799	-40.8936	-37.2314	-40.2832	-31.1279	-20.752	-8.54492	9.76562	28.6865	42.7246	73.8525
94.7	-67.749	-61.0352	-53.7109	-43.9453	-39.0625	-42.7246	-33.5693	-15.2588	-6.71387	17.0898	28.0762	54.3213	77.5146
94.8	-70.8008	-62.2559	-57.373	-46.3867	-45.166	-39.0625	-32.3486	-18.9209	-7.32422	14.6484	28.0762	53.1006	79.3457
94.9	-67.749	-64.6973	-50.6592	-48.2178	-33.5693	-37.2314	-29.2969	-23.1934	-6.10352	11.5967	24.4141	50.0488	86.6699
95	-70.1904	-65.3076	-48.8281	-48.2178	-39.0625	-36.0107	-32.959	-20.1416	-9.76562	12.8174	23.8037	54.9316	78.125
95.1	-72.6318	-60.4248	-59.8145	-51.2695	-35.4004	-30.5176	-32.959	-25.0244	-6.71387	7.32422	25.0244	51.8799	78.125
95.2	-67.1387	-60.4248	-46.3867	-47.6074	-40.8936	-37.8418	-30.5176	-20.1416	-2.44141	3.66211	24.4141	56.7627	84.2285
95.3	-67.1387	-63.4766	-50.0488	-46.9971	-37.2314	-34.1797	-28.0762	-10.9863	-7.32422	11.5967	21.9727	55.542	79.9561
95.4	-66.5283	-67.749	-54.3213	-45.7764	-42.7246	-39.6729	-29.2969	-17.0898	-9.15527	12.207	25.0244	57.9834	78.7354
95.5	-71.4111	-61.6455	-53.1006	-50.0488	-36.6211	-36.0107	-29.9072	-20.752	-14.6484	9.15527	21.3623	54.9316	83.6182
95.6	-70.8008	-57.373	-50.6592	-43.335	-37.8418	-39.6729	-28.0762	-14.6484	-10.9863	15.8691	27.4658	57.373	77.5146
95.7	-67.749	-57.9834	-50.6592	-40.2832	-42.1143	-36.6211	-25.0244	-21.9727	-6.71387	11.5967	22.583	54.9316	82.3975
95.8	-65.3076	-65.918	-52.4902	-41.5039	-35.4004	-42.1143	-29.9072	-16.4795	-8.54492	16.4795	28.0762	53.1006	75.0732
95.9	-68.9697	-61.0352	-46.3867	-51.8799	-34.1797	-38.4521	-28.0762	-17.7002	-7.32422	12.8174	31.1279	50.0488	75.6836
96	-69.5801	-65.918	-45.7764	-43.335	-34.1797	-32.959	-29.9072	-15.8691	-12.8174	12.8174	26.8555	59.8145	85.4492
96.1	-70.8008	-64.0869	-50.0488	-40.2832	-41.5039	-39.6729	-29.2969	-14.6484	-10.376	14.0381	23.1934	57.373	84.8389
96.2	-70.1904	-61.0352	-43.9453	-44.5557	-38.4521	-42.1143	-23.8037	-15.2588	-12.8174	15.8691	26.2451	65.918	87.2803
96.3	-73.2422	-60.4248	-46.9971	-47.6074	-41.5039	-32.3486	-28.0762	-7.93457	-10.9863	14.0381	24.4141	61.6455	84.2285
96.4	-69.5801	-57.9834	-50.0488	-43.335	-31.7383	-36.0107	-28.6865	-18.3105	-5.49316	14.0381	29.2969	56.1523	82.3975
96.5	-68.9697	-61.6455	-50.6592	-43.335	-34.79	-38.4521	-27.4658	-10.9863	-4.27246	15.2588	31.7383	64.6973	85.4492
96.6	-63.4766	-62.8662	-53.7109	-46.3867	-33.5693	-36.0107	-26.2451	-14.6484	-8.54492	8.54492	31.7383	63.4766	86.0596
96.7	-68.3594	-62.2559	-43.9453	-45.166	-34.1797	-34.79	-21.9727	-10.376	-4.27246	12.207	32.3486	57.9834	88.501
96.8	-68.9697	-60.4248	-49.4385	-42.7246	-42.7246	-34.1797	-20.1416	-21.3623	0	7.32422	28.6865	58.5938	81.1768
96.9	-66.5283	-64.6973	-46.9971	-45.166	-39.6729	-37.8418	-23.8037	-7.32422	-4.27246	14.0381	29.9072	57.373	84.8389
97	-66.5283	-61.0352	-49.4385	-49.4385	-31.7383	-31.7383	-27.4658	-12.8174	-7.93457	14.6484	29.2969	61.6455	85.4492
97.1	-65.918	-65.3076	-51.8799	-47.6074	-36.0107	-34.1797	-15.8691	-16.4795	-4.27246	6.10352	32.959	64.0869	85.4492
97.2	-63.4766	-61.0352	-48.8281	-46.3867	-43.335	-26.8555	-18.9209	-17.7002	-2.44141	13.4277	34.1797	62.2559	88.501
97.3	-66.5283	-61.0352	-51.2695	-45.7764	-45.166	-36.0107	-23.8037	-14.6484	-3.66211	16.4795	28.0762	62.8662	90.9424
97.4	-72.6318	-53.7109	-54.9316	-43.9453	-36.0107	-36.6211	-23.8037	-12.8174	-5.49316	11.5967	32.3486	65.918	86.6699
97.5	-68.9697	-67.1387	-53.1006	-42.7246	-39.0625	-35.4004	-29.9072	-14.0381	0	11.5967	28.0762	60.4248	92.7734
97.6	-68.3594	-65.3076	-51.2695	-48.8281	-40.2832	-34.1797	-32.959	-12.207	-1.2207	10.376	32.959	64.6973	97.0459
97.7	-67.1387	-60.4248	-49.4385	-48.2178	-38.4521	-32.959	-23.8037	-12.207	-10.376	16.4795	32.3486	61.6455	89.7217
97.8	-69.5801	-62.2559	-45.7764	-45.7764	-45.7764	-36.0107	-29.9072	-7.93457	-0.610352	20.1416	34.1797	62.8662	95.2148
97.9	-67.1387	-56.7627	-45.7764	-45.7764	-37.2314	-36.6211	-20.1416	-3.05176	-0.610352	10.376	37.8418	61.6455	90.332
98	-65.918	-56.7627	-48.2178	-47.6074	-34.1797	-41.5039	-26.8555	-12.207	0	14.6484	31.1279	66.5283	95.2148
98.1	-68.3594	-57.9834	-54.3213	-44.5557	-43.335	-37.8418	-26.2451	-7.93457	-8.54492	15.8691	37.8418	67.1387	103.149
98.2	-65.918	-54.9316	-49.4385	-45.166	-39.6729	-31.7383	-31.7383	-18.3105	-3.66211	17.0898	36.0107	64.0869	98.877
98.3	-70.1904	-67.749	-47.6074	-45.7764	-40.8936	-38.4521	-24.4141	-9.76562	-1.2207	11.5967	38.4521	64.0869	89.7217
98.4	-75.6836	-66.5283	-52.4902	-40.2832	-43.9453	-35.4004	-34.79	-10.9863	-1.83105	15.2588	31.1279	65.918	101.318
98.5	-61.6455	-61.6455	-46.9971	-49.4385	-42.1143	-34.1797	-28.6865	-8.54492	-4.27246	15.8691	36.6211	64.0869	98.2666
98.6	-66.5283	-58.5938	-52.4902	-46.9971	-41.5039	-40.8936	-23.1934	-12.8174	-1.2207	15.2588	32.959	68.3594	100.098
98.7	-72.6318	-67.1387	-48.8281	-42.7246	-44.5557	-29.9072	-30.5176	-10.376	-4.27246	19.5312	37.2314	67.749	95.8252
98.8	-60.4248	-54.9316	-52.4902	-44.5557	-39.6729	-34.1797	-23.8037	-7.32422	-0.610352	18.3105	42.1143	65.3076	101.318
98.9	-67.749	-61.6455	-48.2178	-42.7246	-38.4521	-30.5176	-25.0244	-10.9863	1.2207	18.3105	36.0107	64.0869	100.098
99	-67.1387	-63.4766	-52.4902	-46.3867	-41.5039	-37.2314	-27.4658	-11.5967	-1.2207	20.1416	42.1143	70.8008	109.863
99.1	-66.5283	-62.8662	-52.4902	-45.166	-40.8936	-32.3486	-32.3486	-10.9863	0.610352	15.2588	32.3486	76.2939	94.6045
99.2	-70.8008	-62.8662	-49.4385	-41.5039	-43.9453	-40.8936	-31.7383	-4.88281	-0.610352	18.3105	39.6729	70.8008	106.201
99.3	-70.1904	-58.5938	-48.2178	-46.3867	-35.4004	-32.959	-26.2451	-12.8174	6.71387	22.583	40.2832	78.125	106.201
99.4	-62.8662	-62.8662	-53.1006	-43.335	-42.7246	-34.79	-21.3623	-13.4277	-1.83105	22.583	39.0625	75.0732	107.422
99.5	-67.749	-58.5938	-51.8799	-41.5039	-40.8936	-32.959	-28.6865	-14.0381	1.2207	17.0898	32.959	76.9043	106.812
99.6	-69.5801	-61.0352	-50.0488	-42.7246	-45.7764	-28.0762	-23.1934	-13.4277	-0.610352	16.4795	42.7246	79.3457	119.019
99.7	-72.6318	-61.6455	-48.2178	-46.9971	-38.4521	-37.2314	-23.8037	-15.8691	0	20.1416	38.4521	82.3975	116.577
99.8	-62.2559	-64.6973	-53.7109	-43.9453	-45.166	-32.959	-18.9209	-12.207	2.44141	16.4795	37.8418	85.4492	114.746
99.9	-66.5283	-61.0352	-45.7764	-42.7246	-40.2832	-32.959	-20.752	-10.9863	1.2207	20.1416	36.6211	80.5664	115.967
100	-61.6455	-64.0869	-54.3213	-43.9453	-43.9453	-32.959	-18.9209	-10.376	-4.27246	21.9727	40.8936	81.7871	116.577
100.1	-67.1387	-64.6973	-50.0488	-37.8418	-34.1797	-36.0107	-24.4141	-12.207	0	15.8691	34.79	80.5664	120.239
100.2	-61.6455	-58.5938	-50.0488	-38.4521	-36.6211	-34.79	-17.0898	-9.15527	5.49316	20.1416	33.5693	86.6699	118.408
100.3	-71.4111	-61.0352	-49.4385	-42.7246	-42.1143	-28.6865	-22.583	-18.9209	-1.83105	19.5312	39.6729	83.0078	125.122
100.4	-68.3594	-61.0352	-46.3867	-45.7764	-45.7764	-43.335	-22.583	-11.5967	6.71387	20.1416	37.2314	87.2803	119.019
100.5	-66.5283	-61.0352	-52.4902	-44.5557	-38.4521	-32.3486	-26.8555	-20.1416	6.71387	21.9727	40.8936	84.8389	127.563
100.6	-68.9697	-64.6973	-45.166	-43.335	-37.2314	-23.8037	-25.6348	-13.4277	7.32422	24.4141	40.2832	89.1113	124.512
100.7	-74.4629	-62.8662	-51.8799	-43.335	-42.1143	-33.5693	-19.5312	-18.3105	1.83105	23.8037	39.0625	87.8906	124.512
100.8	-62.2559	-61.0352	-53.7109	-48.8281	-39.6729	-33.5693	-22.583	-16.4795	0.610352	29.9072	42.1143	93.3838	119.629
100.9	-68.9697	-53.7109	-51.8799	-42.7246	-43.335	-29.9072	-18.9209	-9.76562	-1.2207	14.6484	44.5557	93.3838	122.681
101	-68.3594	-62.2559	-45.7764	-48.2178	-35.4004	-36.0107	-26.8555	-4.88281	2.44141	21.9727	43.9453	90.332	122.07
101.1	-71.4111	-66.5283	-50.6592	-36.6211	-40.2832	-36.0107	-22.583	-14.6484	4.27246	21.3623	46.3867	86.0596	126.343
101.2	-70.1904	-59.8145	-52.4902	-43.9453	-36.0107	-29.9072	-25.0244	-7.93457	-3.66211	23.8037	45.7764	85.4492	126.953
101.3	-65.918	-64.0869	-51.2695	-51.2695	-34.79	-31.1279	-21.9727	-15.2588	-1.2207	25.6348	51.8799	93.9941	125.732
101.4	-64.6973	-64.6973	-43.9453	-48.8281	-34.1797	-34.79	-25.6348	-10.376	1.83105	20.1416	41.5039	92.1631	131.836
101.5	-65.918	-61.0352	-53.7109	-48.2178	-39.6729	-31.7383	-17.0898	-15.2588	3.66211	17.0898	43.9453	90.332	134.277
101.6	-62.8662	-59.2041	-53.1006	-53.1006	-46.9971	-32.3486	-26.8555	-10.9863	12.8174	18.9209	43.335	93.9941	128.174
101.7	-72.0215	-56.7627	-55.542	-49.4385	-41.5039	-34.79	-21.3623	-11.5967	4.27246	23.8037	53.1006	100.098	132.446
101.8	-65.918	-62.8662	-52.4902	-45.7764	-37.2314	-28.6865	-25.6348	-13.4277	-1.83105	21.9727	47.6074	98.877	132.446
101.9	-66.5283	-60.4248	-54.3213	-50.0488	-34.79	-32.959	-28.0762	-15.8691	3.05176	28.6865	46.3867	93.3838	137.939
102	-70.8008	-56.7627	-49.4385	-40.8936	-46.3867	-29.9072	-10.9863	-18.9209	-3.66211	24.4141	47.6074	100.708	128.784
102.1	-69.5801	-62.8662	-49.4385	-41.5039	-39.0625	-33.5693	-25.6348	-14.0381	7.93457	23.1934	45.7764	101.929	134.277
102.2	-67.749	-61.6455	-54.3213	-44.5557	-41.5039	-39.6729	-20.1416	-12.8174	4.88281	19.5312	51.2695	98.877	138.55
102.3	-65.918	-61.6455	-51.8799	-46.3867	-39.0625	-34.79	-24.4141	-17.7002	0	25.0244	50.6592	104.37	139.771
102.4	-75.6836	-61.0352	-54.9316	-41.5039	-37.8418	-32.3486	-19.5312	-12.207	-1.2207	23.1934	51.8799	104.37	146.484
102.5	-78.125	-59.8145	-57.373	-45.7764	-39.0625	-28.6865	-27.4658	-15.2588	-3.05176	22.583	51.8799	102.539	143.433
102.6	-69.5801	-59.2041	-53.7109	-37.8418	-39.6729	-28.0762	-21.3623	-17.0898	3.05176	23.1934	50.0488	105.591	135.498
102.7	-72.0215	-63.4766	-43.9453	-42.1143	-45.166	-29.9072	-23.1934	-19.5312	4.27246	23.1934	53.7109	107.422	142.212
102.8	-68.3594	-66.5283	-57.373	-45.7764	-38.4521	-33.5693	-26.2451	-18.9209	5.49316	23.8037	57.9834	103.76	143.433
102.9	-68.9697	-59.8145	-48.8281	-51.8799	-39.0625	-34.79	-20.752	-21.9727	-0.610352	32.3486	54.3213	102.539	147.705
103	-59.2041	-65.3076	-51.2695	-48.8281	-40.8936	-31.7383	-26.2451	-7.93457	4.27246	27.4658	54.3213	109.253	152.588
103.1	-67.1387	-63.4766	-53.7109	-45.7764	-44.5557	-28.6865	-24.4141	-14.6484	10.9863	26.8555	54.9316	111.694	151.978
103.2	-77.5146	-67.749	-46.3867	-48.8281	-37.8418	-27.4658	-16.4795	-13.4277	3.66211	21.9727	51.8799	107.422	153.809
103.3	-62.8662	-67.1387	-50.6592	-47.6074	-39.0625	-36.6211	-24.4141	-18.9209	9.76562	20.1416	56.7627	103.149	147.705
103.4	-70.1904	-65.918	-48.8281	-45.7764	-40.8936	-32.959	-21.3623	-18.9209	3.05176	24.4141	55.542	112.915	151.367
103.5	-77.5146	-65.918	-53.7109	-50.0488	-43.335	-34.1797	-15.8691	-21.3623	7.32422	29.2969	61.6455	116.577	155.029
103.6	-72.6318	-63.4766	-50.0488	-43.335	-42.1143	-24.4141	-17.7002	-12.8174	7.32422	26.2451	58.5938	114.746	159.302
103.7	-75.6836	-60.4248	-50.0488	-45.7764	-39.6729	-36.0107	-17.7002	-22.583	6.71387	32.3486	59.8145	122.681	150.757
103.8	-68.3594	-62.2559	-50.0488	-45.166	-38.4521	-37.8418	-23.1934	-15.2588	4.88281	31.7383	58.5938	115.967	161.133
103.9	-71.4111	-62.8662	-48.8281	-44.5557	-35.4004	-29.2969	-24.4141	-17.7002	7.32422	30.5176	61.0352	113.525	159.912
104	-72.6318	-67.1387	-51.8799	-49.4385	-40.8936	-32.3486	-19.5312	-18.3105	4.88281	34.79	62.2559	121.46	160.522
104.1	-78.7354	-64.0869	-51.8799	-40.8936	-46.3867	-34.1797	-23.1934	-9.76562	10.376	34.1797	66.5283	123.901	163.574
104.2	-72.6318	-57.9834	-45.166	-50.6592	-38.4521	-35.4004	-24.4141	-16.4795	4.27246	34.1797	61.6455	124.512	169.678
104.3	-71.4111	-62.2559	-47.6074	-47.6074	-40.8936	-26.8555	-18.3105	-11.5967	8.54492	28.6865	59.2041	128.784	163.574
104.4	-68.9697	-65.918	-50.0488	-43.9453	-40.8936	-29.9072	-23.8037	-17.7002	11.5967	31.7383	65.3076	124.512	166.016
104.5	-65.918	-61.0352	-46.3867	-48.2178	-38.4521	-32.959	-24.4141	-7.93457	6.10352	33.5693	64.6973	125.122	171.509
104.6	-71.4111	-61.0352	-45.166	-45.166	-39.6729	-36.6211	-24.4141	-14.6484	7.32422	37.2314	67.1387	129.395	162.964
104.7	-73.2422	-72.0215	-42.7246	-39.0625	-39.6729	-26.2451	-24.4141	-9.15527	11.5967	40.2832	66.5283	126.343	168.457
104.8	-69.5801	-63.4766	-49.4385	-42.7246	-46.9971	-32.959	-26.2451	-3.66211	6.71387	36.6211	70.1904	129.395	175.171
104.9	-67.1387	-58.5938	-54.9316	-48.8281	-40.2832	-33.5693	-21.9727	-7.93457	4.88281	42.7246	68.3594	130.005	183.716
105	-68.3594	-62.2559	-49.4385	-45.166	-37.2314	-32.3486	-26.2451	-10.9863	10.9863	31.7383	74.4629	131.836	180.054
105.1	-72.0215	-59.8145	-48.8281	-45.7764	-39.6729	-28.6865	-23.8037	-17.7002	4.88281	37.2314	72.0215	131.836	170.898
105.2	-66.5283	-61.6455	-56.7627	-43.335	-42.7246	-31.1279	-21.9727	-10.376	6.10352	32.959	75.6836	133.667	180.054
105.3	-73.8525	-61.0352	-50.6592	-39.6729	-40.2832	-35.4004	-25.6348	-7.93457	6.71387	29.9072	77.5146	130.005	180.054
105.4	-66.5283	-58.5938	-56.1523	-36.6211	-35.4004	-32.3486	-20.752	-5.49316	9.76562	29.9072	81.7871	140.991	173.34
105.5	-68.9697	-58.5938	-45.166	-40.8936	-39.6729	-31.1279	-24.4141	-6.71387	15.8691	35.4004	82.3975	137.329	181.274
105.6	-67.749	-62.2559	-50.0488	-48.2178	-43.335	-35.4004	-17.7002	-5.49316	6.10352	36.6211	74.4629	135.498	184.326
105.7	-64.6973	-57.373	-48.8281	-50.0488	-42.7246	-33.5693	-25.6348	-3.05176	7.32422	32.959	78.7354	142.822	187.988
105.8	-67.749	-58.5938	-48.2178	-50.6592	-42.7246	-31.1279	-23.8037	-5.49316	8.54492	36.0107	81.7871	141.602	185.547
105.9	-68.9697	-59.8145	-48.8281	-41.5039	-30.5176	-36.6211	-28.0762	-3.66211	13.4277	33.5693	84.2285	140.991	202.026
106	-72.0215	-58.5938	-53.1006	-41.5039	-34.1797	-30.5176	-17.7002	-9.15527	9.76562	34.1797	74.4629	142.822	199.585
106.1	-64.0869	-65.3076	-51.2695	-39.6729	-39.0625	-32.3486	-24.4141	-12.207	9.15527	39.0625	84.8389	139.16	197.144
106.2	-65.918	-64.0869	-53.7109	-46.3867	-31.1279	-29.2969	-18.9209	-5.49316	10.376	40.2832	90.9424	142.822	202.026
106.3	-66.5283	-60.4248	-48.2178	-45.166	-39.0625	-34.79	-20.752	-4.27246	14.0381	43.335	91.5527	137.939	205.688
106.4	-61.0352	-62.2559	-54.9316	-48.8281	-36.0107	-30.5176	-25.6348	-8.54492	10.376	36.6211	84.8389	144.043	207.52
106.5	-67.1387	-62.2559	-49.4385	-50.0488	-42.1143	-29.9072	-22.583	-3.66211	7.93457	42.7246	89.1113	147.095	208.74
106.6	-72.6318	-57.9834	-51.2695	-42.1143	-37.2314	-32.959	-21.3623	-18.3105	12.8174	50.0488	93.3838	150.146	214.844
106.7	-70.1904	-62.2559	-45.7764	-43.335	-42.1143	-28.0762	-26.8555	-13.4277	12.8174	42.7246	95.8252	145.264	213.623
106.8	-68.3594	-67.1387	-48.2178	-43.9453	-35.4004	-26.2451	-28.6865	-1.2207	9.15527	41.5039	89.7217	150.757	211.182
106.9	-67.1387	-62.2559	-57.373	-46.3867	-35.4004	-32.3486	-20.1416	-6.10352	12.207	41.5039	90.332	150.757	217.285
107	-68.9697	-65.3076	-50.6592	-46.9971	-42.1143	-26.8555	-25.6348	-8.54492	10.376	49.4385	93.9941	155.029	214.844
107.1	-72.6318	-64.0869	-51.2695	-45.7764	-43.9453	-26.2451	-29.9072	-7.32422	18.3105	52.4902	102.539	151.367	223.389
107.2	-65.3076	-64.6973	-51.2695	-42.7246	-37.2314	-29.2969	-22.583	-11.5967	11.5967	48.2178	98.2666	153.198	222.168
107.3	-64.0869	-67.1387	-53.1006	-49.4385	-36.0107	-31.7383	-21.9727	-3.05176	17.7002	43.335	94.6045	151.978	222.778
107.4	-72.6318	-62.2559	-56.7627	-45.7764	-34.1797	-33.5693	-18.3105	-1.2207	15.2588	50.6592	94.6045	163.574	223.389
107.5	-73.8525	-62.8662	-54.3213	-43.9453	-38.4521	-29.2969	-14.6484	-6.10352	11.5967	53.1006	97.0459	152.588	228.882
107.6	-75.6836	-64.0869	-52.4902	-45.7764	-45.7764	-26.8555	-21.9727	-4.88281	12.207	54.3213	98.877	156.25	233.154
107.7	-67.1387	-54.9316	-46.3867	-45.166	-36.0107	-32.959	-22.583	-4.27246	10.376	55.542	97.6562	161.743	233.765
107.8	-68.3594	-60.4248	-56.1523	-43.9453	-37.2314	-26.2451	-20.1416	-3.66211	9.15527	54.3213	95.2148	158.081	231.323
107.9	-68.9697	-60.4248	-51.8799	-48.2178	-45.166	-25.6348	-20.1416	-2.44141	14.0381	56.7627	95.2148	155.64	232.544
108	-68.9697	-67.1387	-48.2178	-42.1143	-37.2314	-32.3486	-22.583	-9.76562	18.9209	53.7109	101.318	161.743	228.271
108.1	-72.0215	-62.2559	-49.4385	-50.6592	-43.9453	-31.7383	-25.0244	1.83105	15.8691	53.7109	95.8252	166.016	234.375
108.2	-72.0215	-62.2559	-50.0488	-46.3867	-46.3867	-30.5176	-24.4141	1.2207	20.752	51.8799	93.9941	161.133	238.647
108.3	-72.0215	-66.5283	-51.8799	-42.7246	-43.335	-29.9072	-18.3105	-4.27246	20.1416	56.1523	97.0459	170.288	239.868
108.4	-70.1904	-70.8008	-47.6074	-43.9453	-35.4004	-29.9072	-22.583	-6.10352	12.8174	62.2559	100.708	162.354	239.868
108.5	-70.1904	-58.5938	-50.6592	-38.4521	-36.6211	-31.7383	-12.8174	-1.2207	12.8174	51.2695	98.2666	162.964	238.647
108.6	-72.0215	-64.0869	-47.6074	-46.3867	-40.8936	-27.4658	-12.8174	-9.15527	10.376	59.8145	106.812	166.626	241.089
108.7	-70.8008	-63.4766	-48.8281	-43.9453	-39.0625	-28.6865	-26.8555	-5.49316	9.76562	59.8145	107.422	164.185	243.53
108.8	-67.749	-59.2041	-48.8281	-44.5557	-35.4004	-30.5176	-16.4795	-6.71387	23.1934	56.7627	103.149	162.354	254.517
108.9	-69.5801	-66.5283	-51.8799	-44.5557	-40.2832	-32.3486	-21.9727	-3.05176	19.5312	59.2041	106.812	172.119	251.465
109	-72.0215	-61.0352	-48.2178	-40.2832	-39.0625	-32.3486	-24.4141	-6.71387	18.9209	55.542	106.812	169.067	249.023
109.1	-70.8008	-59.8145	-46.9971	-45.7764	-40.8936	-31.7383	-21.9727	-5.49316	17.0898	56.7627	107.422	174.561	258.789
109.2	-72.6318	-62.8662	-48.8281	-46.3867	-36.0107	-35.4004	-20.752	-3.66211	19.5312	54.9316	106.201	173.34	262.451
109.3	-72.0215	-62.8662	-49.4385	-45.166	-40.2832	-25.6348	-21.9727	-3.66211	18.3105	65.918	109.253	178.223	267.944
109.4	-65.918	-62.2559	-58.5938	-45.7764	-46.9971	-29.9072	-28.6865	-6.10352	22.583	55.542	105.591	180.664	259.399
109.5	-76.2939	-64.6973	-51.2695	-49.4385	-36.6211	-32.959	-28.6865	-2.44141	19.5312	61.6455	112.305	186.157	261.841
109.6	-72.6318	-67.1387	-53.1006	-51.8799	-37.2314	-31.1279	-21.3623	-3.66211	19.5312	62.2559	113.525	182.495	269.165
109.7	-71.4111	-60.4248	-58.5938	-43.335	-43.335	-32.3486	-22.583	-7.32422	21.3623	72.0215	108.643	183.716	268.555
109.8	-70.1904	-61.0352	-47.6074	-43.335	-40.8936	-29.9072	-18.9209	-6.71387	24.4141	64.6973	116.577	180.664	268.555
109.9	-73.8525	-60.4248	-43.335	-37.2314	-34.79	-34.79	-23.8037	-4.27246	21.9727	67.749	122.07	187.988	276.489
110	-75.0732	-63.4766	-53.1006	-40.8936	-37.8418	-37.2314	-14.0381	-3.05176	20.1416	75.0732	112.915	189.209	275.269
110.1	-68.9697	-62.2559	-49.4385	-45.7764	-37.8418	-24.4141	-12.207	-10.9863	23.8037	69.5801	123.291	181.274	280.762
110.2	-71.4111	-64.6973	-56.7627	-41.5039	-41.5039	-31.7383	-17.7002	1.2207	21.9727	70.1904	116.577	185.547	279.541
110.3	-74.4629	-64.6973	-50.6592	-47.6074	-40.2832	-27.4658	-20.1416	-1.83105	28.0762	67.1387	117.798	184.326	278.931
110.4	-72.6318	-60.4248	-53.1006	-40.8936	-34.1797	-28.0762	-19.5312	-4.27246	27.4658	64.6973	122.681	188.599	286.255
110.5	-68.9697	-68.9697	-49.4385	-43.335	-34.1797	-28.6865	-20.752	-3.66211	26.8555	76.9043	124.512	187.378	290.527
110.6	-69.5801	-64.0869	-57.373	-45.166	-40.8936	-24.4141	-21.9727	-1.2207	21.9727	73.8525	120.85	182.495	288.696
110.7	-73.2422	-68.9697	-57.373	-46.9971	-39.0625	-29.9072	-21.9727	-4.88281	24.4141	68.9697	115.967	181.885	292.969
110.8	-72.0215	-65.918	-57.373	-44.5557	-41.5039	-31.7383	-21.3623	-3.05176	31.1279	67.1387	115.967	184.937	289.917
110.9	-70.1904	-65.3076	-49.4385	-36.6211	-33.5693	-33.5693	-15.8691	-0.610352	31.1279	70.8008	122.07	183.105	292.969
111	-72.0215	-64.0869	-45.166	-51.8799	-35.4004	-29.2969	-20.752	4.27246	30.5176	67.749	112.915	190.43	300.903
111.1	-65.3076	-60.4248	-49.4385	-45.7764	-38.4521	-25.6348	-15.2588	-5.49316	28.0762	67.1387	126.953	193.481	299.072
111.2	-70.8008	-59.8145	-51.8799	-42.7246	-36.0107	-34.1797	-16.4795	1.2207	24.4141	65.3076	119.629	192.871	299.072
111.3	-73.2422	-66.5283	-47.6074	-46.3867	-34.1797	-31.1279	-12.207	3.66211	31.7383	70.8008	120.239	195.923	299.683
111.4	-74.4629	-62.8662	-53.1006	-43.335	-41.5039	-34.1797	-17.7002	-1.83105	26.2451	71.4111	124.512	198.364	301.514
111.5	-70.1904	-65.3076	-50.6592	-46.3867	-35.4004	-36.0107	-20.1416	-6.71387	29.2969	73.2422	122.681	200.195	307.007
111.6	-65.918	-61.0352	-50.6592	-43.9453	-35.4004	-28.6865	-22.583	-1.2207	32.959	72.0215	127.563	201.416	307.617
111.7	-70.8008	-57.9834	-55.542	-41.5039	-37.2314	-25.0244	-22.583	-3.66211	26.8555	78.7354	125.732	201.416	312.5
111.8	-75.0732	-63.4766	-46.3867	-48.2178	-34.79	-32.3486	-15.2588	-0.610352	34.79	73.8525	131.836	202.637	311.89
111.9	-67.749	-60.4248	-50.6592	-43.9453	-39.6729	-29.9072	-17.0898	-4.27246	37.2314	75.6836	128.174	204.468	319.824
112	-65.918	-62.8662	-47.6074	-45.166	-37.2314	-32.3486	-17.7002	6.10352	29.2969	73.2422	133.057	205.078	322.876
112.1	-65.918	-70.8008	-51.2695	-48.2178	-28.6865	-21.9727	-16.4795	3.66211	29.9072	71.4111	132.446	206.909	318.604
112.2	-70.8008	-62.2559	-53.7109	-38.4521	-40.2832	-33.5693	-14.6484	2.44141	22.583	72.6318	128.174	213.623	325.928
112.3	-68.3594	-59.8145	-48.8281	-49.4385	-40.2832	-29.9072	-19.5312	-4.27246	29.9072	75.6836	130.615	214.844	334.473
112.4	-68.9697	-64.6973	-47.6074	-46.9971	-39.6729	-31.1279	-17.0898	1.83105	36.6211	72.0215	128.784	217.285	329.59
112.5	-70.8008	-65.918	-45.166	-45.166	-33.5693	-29.9072	-17.0898	2.44141	35.4004	75.0732	137.329	218.506	336.914
112.6	-68.3594	-61.0352	-51.2695	-45.166	-40.8936	-32.3486	-15.2588	0.610352	37.2314	78.7354	131.836	219.727	327.148
112.7	-67.749	-64.0869	-46.9971	-42.7246	-36.0107	-35.4004	-15.2588	0.610352	39.0625	80.5664	147.095	221.558	328.369
112.8	-73.2422	-63.4766	-50.0488	-43.9453	-34.1797	-30.5176	-9.15527	-0.610352	29.2969	76.9043	141.602	225.22	341.797
112.9	-68.3594	-64.6973	-54.9316	-46.3867	-32.959	-34.1797	-8.54492	6.10352	35.4004	78.125	142.212	223.389	340.576
113	-67.1387	-61.6455	-46.3867	-45.7764	-33.5693	-29.9072	-11.5967	-3.05176	34.79	80.5664	137.329	225.83	344.849
113.1	-67.749	-60.4248	-48.2178	-40.8936	-39.0625	-28.6865	-20.1416	3.66211	26.8555	73.8525	139.16	231.934	345.459
113.2	-62.2559	-65.3076	-54.3213	-39.0625	-31.1279	-31.7383	-10.376	7.32422	37.8418	75.6836	143.433	227.051	347.29
113.3	-71.4111	-65.918	-51.2695	-48.2178	-34.79	-37.8418	-12.207	-1.2207	37.8418	78.7354	145.264	233.765	345.459
113.4	-67.749	-67.1387	-53.1006	-41.5039	-37.2314	-29.2969	-15.8691	6.10352	32.959	79.9561	139.771	238.647	352.173
113.5	-75.0732	-61.0352	-49.4385	-39.0625	-39.0625	-26.8555	-9.76562	-1.83105	34.1797	79.9561	141.602	236.206	356.445
113.6	-69.5801	-60.4248	-51.2695	-44.5557	-35.4004	-28.0762	-15.8691	4.88281	34.1797	79.3457	145.874	233.765	352.783
113.7	-73.8525	-64.6973	-54.9316	-45.166	-37.8418	-34.1797	-6.10352	3.05176	40.8936	81.1768	152.588	236.206	358.276
113.8	-72.0215	-62.2559	-56.1523	-49.4385	-40.8936	-25.6348	-16.4795	3.66211	38.4521	78.125	146.484	243.53	356.445
113.9	-67.749	-61.6455	-53.7109	-46.9971	-37.2314	-30.5176	-13.4277	5.49316	36.6211	78.125	150.757	242.92	368.042
114	-73.2422	-64.0869	-50.0488	-43.9453	-40.8936	-36.0107	-17.7002	4.88281	32.959	84.2285	153.809	244.751	367.432
114.1	-72.0215	-60.4248	-47.6074	-46.3867	-43.9453	-29.9072	-12.207	5.49316	37.8418	83.0078	156.86	241.089	370.483
114.2	-72.0215	-61.6455	-51.2695	-40.2832	-32.3486	-34.79	-11.5967	-1.83105	39.0625	83.0078	153.198	242.92	366.211
114.3	-66.5283	-65.3076	-47.6074	-46.9971	-34.1797	-29.2969	-16.4795	3.66211	33.5693	82.3975	154.419	242.92	373.535
114.4	-68.3594	-65.918	-47.6074	-46.3867	-33.5693	-36.6211	-10.376	1.83105	37.8418	87.8906	159.912	252.075	372.314
114.5	-69.5801	-67.1387	-47.6074	-42.1143	-42.1143	-33.5693	-16.4795	-1.2207	39.0625	82.3975	162.354	245.361	376.587
114.6	-70.8008	-62.8662	-50.6592	-41.5039	-36.6211	-32.959	-16.4795	-1.2207	37.8418	86.0596	159.912	245.972	380.249
114.7	-73.8525	-64.0869	-50.6592	-42.1143	-36.0107	-37.2314	-9.15527	4.88281	32.3486	89.7217	166.626	241.699	387.573
114.8	-68.3594	-63.4766	-48.2178	-43.9453	-40.2832	-28.6865	-13.4277	2.44141	36.6211	91.5527	163.574	255.127	388.794
114.9	-69.5801	-65.918	-55.542	-39.0625	-37.2314	-32.3486	-14.6484	-3.66211	32.3486	89.7217	164.795	256.958	389.404
115	-57.9834	-68.3594	-46.9971	-42.7246	-40.2832	-26.8555	-17.0898	2.44141	42.1143	89.7217	171.509	254.517	393.677
115.1	-62.2559	-61.6455	-48.8281	-48.8281	-37.2314	-30.5176	-10.376	0	44.5557	97.6562	178.223	249.634	399.78
115.2	-69.5801	-67.749	-46.3867	-44.5557	-40.2832	-31.1279	-13.4277	5.49316	41.5039	84.8389	169.678	256.348	401.001
115.3	-70.1904	-69.5801	-48.8281	-46.3867	-34.79	-38.4521	-17.7002	5.49316	39.0625	93.9941	175.171	261.23	406.494
115.4	-67.1387	-58.5938	-54.3213	-42.7246	-41.5039	-25.0244	-12.207	10.9863	40.8936	86.6699	174.561	256.348	410.767
115.5	-71.4111	-67.749	-54.9316	-50.6592	-36.6211	-34.1797	-10.376	9.15527	48.2178	92.1631	171.509	267.944	404.053
115.6	-68.9697	-60.4248	-48.8281	-44.5557	-32.959	-27.4658	-17.0898	9.15527	36.0107	89.7217	182.495	263.672	408.325
115.7	-69.5801	-66.5283	-54.9316	-48.8281	-39.0625	-33.5693	-17.0898	8.54492	43.335	94.6045	175.171	267.334	413.818
115.8	-66.5283	-61.0352	-52.4902	-42.1143	-37.2314	-30.5176	-8.54492	6.71387	40.2832	95.8252	186.157	270.996	417.48
115.9	-65.918	-57.9834	-50.0488	-48.8281	-39.6729	-32.959	-10.376	6.10352	39.0625	95.8252	177.612	274.048	410.156
116	-70.1904	-65.918	-54.9316	-39.0625	-37.8418	-23.1934	-9.76562	7.32422	38.4521	97.0459	186.157	276.489	418.701
116.1	-64.0869	-61.6455	-50.6592	-41.5039	-37.8418	-32.3486	-11.5967	8.54492	36.0107	94.6045	189.209	277.71	416.26
116.2	-64.6973	-64.0869	-43.9453	-45.7764	-37.2314	-37.8418	-11.5967	4.88281	42.7246	95.2148	183.105	281.372	423.584
116.3	-72.6318	-59.2041	-54.9316	-44.5557	-40.2832	-29.2969	-7.32422	8.54492	39.6729	94.6045	185.547	274.658	428.467
116.4	-70.1904	-61.0352	-51.8799	-42.1143	-34.79	-29.9072	-10.376	-0.610352	46.9971	102.539	184.326	279.541	424.805
116.5	-66.5283	-55.542	-57.373	-45.166	-32.3486	-31.1279	-13.4277	3.05176	40.2832	96.4355	186.157	280.151	420.532
116.6	-70.1904	-71.4111	-50.6592	-45.166	-32.959	-30.5176	-14.0381	3.05176	40.2832	95.2148	194.702	282.593	426.025
116.7	-69.5801	-61.0352	-50.6592	-45.166	-32.3486	-25.6348	-16.4795	5.49316	48.2178	103.149	192.871	292.358	431.519
116.8	-70.8008	-62.2559	-51.8799	-48.2178	-39.6729	-31.1279	-17.0898	3.05176	46.3867	101.318	185.547	292.969	434.57
116.9	-71.4111	-66.5283	-45.166	-41.5039	-36.6211	-30.5176	-9.76562	1.83105	42.7246	101.929	191.65	297.241	436.401
117	-68.3594	-62.2559	-52.4902	-39.0625	-34.79	-29.2969	-11.5967	4.88281	42.7246	104.37	192.871	297.241	432.739
117.1	-62.2559	-58.5938	-48.2178	-43.335	-41.5039	-39.0625	-6.10352	6.10352	48.8281	100.708	197.754	295.41	435.791
117.2	-62.2559	-63.4766	-44.5557	-45.166	-40.8936	-31.7383	-13.4277	-0.610352	48.2178	103.76	195.312	303.955	439.453
117.3	-68.9697	-59.2041	-50.6592	-42.1143	-34.1797	-30.5176	-13.4277	1.83105	51.2695	111.084	198.975	304.565	441.284
117.4	-70.1904	-62.2559	-51.8799	-48.2178	-39.0625	-31.1279	-5.49316	5.49316	51.2695	104.98	199.585	307.617	444.946
117.5	-68.9697	-65.3076	-50.0488	-40.2832	-45.166	-37.8418	-7.32422	7.32422	51.8799	108.643	196.533	310.669	445.557
117.6	-69.5801	-62.8662	-53.1006	-40.8936	-43.335	-29.9072	-11.5967	6.71387	54.3213	106.812	202.026	307.617	451.66
117.7	-68.3594	-60.4248	-50.6592	-43.9453	-40.2832	-28.6865	-11.5967	4.27246	55.542	111.084	196.533	315.552	445.557
117.8	-63.4766	-64.6973	-53.1006	-46.3867	-36.6211	-29.2969	-7.93457	7.93457	50.6592	117.188	198.364	316.772	452.271
117.9	-75.6836	-57.373	-51.8799	-42.1143	-42.7246	-29.2969	-12.207	4.27246	46.3867	112.915	200.195	311.89	460.205
118	-68.3594	-64.6973	-52.4902	-45.7764	-40.8936	-30.5176	-11.5967	7.93457	46.9971	109.253	204.468	312.5	457.153
118.1	-65.3076	-65.918	-51.8799	-46.9971	-40.8936	-24.4141	-10.9863	7.93457	53.1006	120.85	208.13	319.824	463.867
118.2	-64.0869	-61.0352	-48.8281	-41.5039	-39.0625	-26.8555	-15.8691	14.0381	52.4902	125.732	209.351	317.993	465.088
118.3	-68.9697	-65.918	-50.0488	-43.335	-38.4521	-31.7383	-13.4277	6.10352	53.1006	120.239	202.637	322.266	470.581
118.4	-71.4111	-59.2041	-51.8799	-44.5557	-40.8936	-23.1934	-8.54492	6.10352	58.5938	128.784	206.299	319.824	470.581
118.5	-65.918	-62.2559	-51.8799	-43.9453	-34.1797	-27.4658	-7.93457	8.54492	53.7109	126.343	213.013	322.266	476.074
118.6	-68.3594	-61.0352	-52.4902	-46.9971	-30.5176	-26.8555	-10.376	4.27246	56.1523	131.226	205.688	326.538	475.464
118.7	-76.2939	-58.5938	-54.3213	-40.8936	-43.335	-26.2451	-8.54492	4.88281	48.8281	126.953	211.182	327.148	480.347
118.8	-67.1387	-62.2559	-43.9453	-46.9971	-34.1797	-31.1279	-6.10352	10.9863	51.2695	120.85	210.571	325.317	482.788
118.9	-62.8662	-65.918	-47.6074	-42.7246	-39.0625	-28.6865	-15.8691	9.15527	54.9316	128.784	211.182	331.421	480.347
119	-74.4629	-61.6455	-57.373	-44.5557	-39.0625	-34.1797	-9.15527	15.8691	51.8799	128.784	212.402	329.59	488.281
119.1	-67.1387	-61.0352	-48.2178	-43.9453	-37.2314	-28.0762	-3.05176	10.9863	52.4902	127.563	214.844	337.524	493.774
119.2	-74.4629	-61.6455	-52.4902	-39.6729	-34.79	-31.1279	-6.71387	6.10352	56.1523	126.953	216.675	337.524	490.723
119.3	-65.918	-62.8662	-56.7627	-40.8936	-42.7246	-23.8037	-9.15527	15.2588	52.4902	130.005	216.064	338.135	499.268
119.4	-69.5801	-64.6973	-51.2695	-45.166	-44.5557	-30.5176	-8.54492	8.54492	48.2178	126.343	221.558	341.797	493.774
119.5	-65.918	-65.3076	-54.9316	-46.3867	-32.959	-29.9072	-5.49316	6.71387	53.1006	127.563	220.947	341.797	502.319
119.6	-71.4111	-67.1387	-50.6592	-45.7764	-34.1797	-27.4658	-3.05176	9.15527	61.0352	134.277	222.168	340.576	503.54
119.7	-71.4111	-62.8662	-51.2695	-45.7764	-46.3867	-32.959	-4.88281	6.71387	59.8145	132.446	219.116	346.68	512.085
119.8	-71.4111	-68.9697	-58.5938	-39.0625	-39.0625	-26.8555	-3.66211	14.6484	57.373	138.55	222.778	340.576	515.747
119.9	-67.1387	-65.918	-48.8281	-48.8281	-37.2314	-34.1797	-7.93457	6.71387	49.4385	136.719	226.44	349.731	520.02
120	-68.3594	-60.4248	-52.4902	-41.5039	-35.4004	-29.9072	-8.54492	10.376	60.4248	130.615	231.934	343.628	518.799
120.1	-64.6973	-64.6973	-53.1006	-47.6074	-39.0625	-34.1797	-7.32422	14.6484	62.2559	142.212	228.882	354.614	518.188
120.2	-64.6973	-67.1387	-48.8281	-43.335	-39.6729	-23.1934	-7.93457	15.2588	58.5938	147.705	225.83	350.952	516.357
120.3	-67.749	-59.8145	-53.1006	-46.3867	-37.8418	-25.6348	-9.76562	8.54492	59.2041	133.667	231.934	350.952	519.409
120.4	-72.0215	-62.2559	-48.2178	-45.166	-37.8418	-30.5176	-8.54492	14.0381	56.1523	139.771	230.103	354.004	523.071
120.5	-73.2422	-58.5938	-49.4385	-43.335	-34.79	-28.6865	-12.207	10.9863	56.1523	142.822	239.868	354.614	529.175
120.6	-68.3594	-63.4766	-51.2695	-42.1143	-38.4521	-28.0762	0	19.5312	62.2559	152.588	237.427	358.276	529.175
120.7	-69.5801	-61.0352	-45.166	-35.4004	-32.3486	-30.5176	-17.7002	16.4795	65.3076	153.809	242.31	363.159	532.227
120.8	-63.4766	-57.9834	-49.4385	-38.4521	-42.7246	-28.0762	-7.93457	20.752	59.2041	150.146	240.479	358.887	531.006
120.9	-68.3594	-63.4766	-50.6592	-46.9971	-34.79	-26.8555	-13.4277	18.3105	63.4766	150.146	242.31	361.328	532.837
121	-69.5801	-63.4766	-50.0488	-44.5557	-36.0107	-34.1797	-10.9863	17.0898	70.8008	153.198	243.53	374.146	529.175
121.1	-68.3594	-62.8662	-44.5557	-43.335	-36.6211	-27.4658	-10.376	19.5312	62.2559	158.691	252.686	368.042	528.564
121.2	-72.6318	-61.6455	-50.0488	-42.1143	-34.1797	-28.0762	-10.9863	16.4795	64.6973	157.471	246.582	369.873	534.058
121.3	-64.0869	-61.6455	-45.7764	-46.9971	-36.0107	-29.9072	-11.5967	10.376	68.9697	157.471	250.854	375.977	533.447
121.4	-80.5664	-61.0352	-48.8281	-40.8936	-40.2832	-31.1279	-13.4277	17.0898	72.0215	153.198	250.244	380.859	536.499
121.5	-64.0869	-65.918	-54.9316	-45.7764	-39.6729	-29.9072	-7.93457	17.0898	71.4111	153.809	256.958	382.08	537.109
121.6	-66.5283	-65.3076	-51.2695	-47.6074	-40.2832	-22.583	-4.88281	16.4795	68.3594	145.874	251.465	386.963	543.213
121.7	-64.6973	-67.749	-53.7109	-38.4521	-39.0625	-28.6865	-3.66211	17.0898	69.5801	151.367	256.348	379.639	545.654
121.8	-68.3594	-61.6455	-48.8281	-47.6074	-38.4521	-28.6865	-8.54492	16.4795	70.8008	154.419	248.413	385.132	547.485
121.9	-64.0869	-58.5938	-54.3213	-41.5039	-34.1797	-25.0244	-2.44141	13.4277	73.2422	156.86	249.634	388.794	548.706
122	-63.4766	-60.4248	-51.8799	-47.6074	-34.1797	-28.6865	-3.05176	19.5312	75.6836	159.912	257.568	391.235	552.979
122.1	-70.8008	-62.2559	-46.3867	-43.9453	-41.5039	-29.9072	-7.32422	19.5312	69.5801	155.029	264.282	397.339	552.979
122.2	-73.2422	-66.5283	-46.3867	-49.4385	-42.7246	-20.1416	-7.32422	17.7002	79.3457	158.691	255.127	402.832	560.303
122.3	-75.6836	-64.6973	-57.373	-48.2178	-37.2314	-25.6348	-0.610352	18.9209	77.5146	156.86	258.179	397.339	562.134
122.4	-69.5801	-56.1523	-51.8799	-39.6729	-35.4004	-29.2969	-7.32422	23.1934	75.0732	156.86	264.893	403.442	574.341
122.5	-67.1387	-56.7627	-46.3867	-39.0625	-36.0107	-32.3486	-4.88281	20.1416	73.8525	162.354	265.503	401.611	573.12
122.6	-75.6836	-59.2041	-57.373	-46.9971	-39.0625	-21.9727	-4.27246	20.752	73.8525	151.367	269.165	410.767	577.393
122.7	-67.1387	-53.7109	-51.2695	-43.335	-36.6211	-32.3486	-7.32422	24.4141	73.8525	162.354	267.944	398.56	584.717
122.8	-72.6318	-59.2041	-51.2695	-43.335	-37.2314	-25.0244	1.2207	13.4277	70.8008	159.302	276.489	402.832	578.613
122.9	-68.9697	-64.6973	-50.0488	-45.7764	-33.5693	-27.4658	-5.49316	12.8174	77.5146	155.64	269.775	411.377	581.055
123	-65.918	-57.373	-50.0488	-37.8418	-33.5693	-32.3486	-3.66211	20.1416	73.2422	156.25	272.217	413.818	584.106
123.1	-67.1387	-61.6455	-51.8799	-45.166	-40.8936	-20.752	-7.32422	18.9209	66.5283	162.354	277.71	418.701	588.379
123.2	-72.6318	-59.2041	-51.8799	-49.4385	-39.0625	-31.7383	-3.66211	19.5312	68.3594	165.405	272.827	422.363	592.651
123.3	-71.4111	-60.4248	-50.6592	-47.6074	-37.2314	-24.4141	-4.88281	20.1416	71.4111	162.964	277.1	427.856	589.6
123.4	-67.749	-61.6455	-54.9316	-34.79	-37.8418	-29.2969	-7.93457	17.0898	76.2939	161.743	285.034	423.584	584.717
123.5	-65.918	-56.7627	-53.1006	-50.0488	-37.8418	-22.583	-9.15527	18.3105	78.7354	170.288	277.1	424.805	598.755
123.6	-61.6455	-62.8662	-54.9316	-43.9453	-45.166	-31.7383	-0.610352	22.583	76.2939	169.678	286.865	422.974	599.365
123.7	-69.5801	-64.6973	-51.2695	-45.166	-39.6729	-29.9072	-5.49316	24.4141	84.2285	171.509	286.255	423.584	603.027
123.8	-68.3594	-61.0352	-51.8799	-44.5557	-32.3486	-29.2969	-4.27246	26.8555	90.9424	169.067	287.476	428.467	609.131
123.9	-67.749	-63.4766	-53.7109	-43.9453	-39.6729	-32.959	-4.27246	21.3623	85.4492	166.626	295.41	430.298	609.131
124	-68.9697	-60.4248	-50.6592	-46.9971	-29.9072	-25.0244	-7.93457	28.0762	84.8389	168.457	296.631	432.129	618.286
124.1	-72.0215	-57.373	-52.4902	-42.1143	-34.79	-27.4658	-2.44141	26.8555	83.6182	177.002	296.021	433.35	610.962
124.2	-65.918	-61.6455	-55.542	-43.335	-40.2832	-22.583	-1.83105	19.5312	84.8389	169.678	293.579	435.791	618.286
124.3	-70.1904	-69.5801	-53.1006	-44.5557	-34.1797	-32.959	-9.15527	24.4141	91.5527	170.898	287.476	435.791	620.728
124.4	-65.3076	-61.0352	-51.2695	-47.6074	-40.8936	-26.2451	-4.27246	28.0762	89.1113	178.833	294.189	433.96	617.065
124.5	-77.5146	-65.918	-49.4385	-47.6074	-30.5176	-22.583	-9.15527	24.4141	83.6182	178.223	296.021	440.674	624.39
124.6	-69.5801	-66.5283	-50.6592	-44.5557	-33.5693	-26.8555	-3.66211	26.8555	81.1768	181.274	291.748	435.181	623.779
124.7	-70.1904	-60.4248	-57.9834	-36.0107	-36.6211	-26.8555	-3.66211	29.2969	93.3838	181.274	293.579	435.181	624.39
124.8	-73.2422	-59.8145	-52.4902	-45.166	-37.2314	-31.1279	-3.66211	25.0244	89.1113	184.326	294.8	441.284	615.845
124.9	-72.0215	-61.0352	-54.3213	-39.6729	-38.4521	-28.0762	-6.10352	20.1416	94.6045	180.054	297.852	442.505	626.221
125	-64.0869	-65.918	-53.7109	-43.335	-34.79	-35.4004	1.2207	17.7002	88.501	189.209	308.228	443.115	628.662
125.1	-73.2422	-63.4766	-48.2178	-45.166	-43.335	-26.8555	-3.66211	29.2969	92.7734	187.378	305.176	447.388	626.831
125.2	-66.5283	-62.8662	-51.2695	-51.2695	-39.6729	-31.1279	-4.88281	27.4658	93.3838	191.65	303.345	451.05	634.766
125.3	-77.5146	-62.8662	-51.2695	-44.5557	-40.2832	-25.6348	0.610352	26.8555	96.4355	187.988	314.941	453.491	639.648
125.4	-73.2422	-62.8662	-54.9316	-40.2832	-32.3486	-26.2451	0.610352	24.4141	95.2148	187.378	314.331	460.815	643.311
125.5	-72.0215	-61.0352	-49.4385	-48.8281	-34.1797	-36.0107	-9.15527	25.6348	93.9941	187.378	313.11	456.543	637.817
125.6	-72.6318	-65.3076	-51.2695	-43.9453	-39.0625	-28.6865	-0.610352	28.6865	103.149	192.261	316.772	467.529	651.245
125.7	-75.6836	-65.3076	-53.7109	-46.3867	-36.6211	-28.6865	3.66211	30.5176	90.9424	193.481	314.331	466.309	646.362
125.8	-79.3457	-65.3076	-51.2695	-45.166	-37.8418	-25.6348	-2.44141	27.4658	90.332	196.533	320.435	466.919	645.142
125.9	-76.2939	-56.7627	-50.0488	-45.7764	-39.6729	-19.5312	-2.44141	27.4658	90.332	198.975	327.759	466.919	650.024
126	-74.4629	-56.1523	-54.3213	-47.6074	-38.4521	-26.8555	-4.88281	25.6348	98.2666	197.754	322.266	466.919	654.297
126.1	-71.4111	-61.0352	-50.6592	-43.9453	-30.5176	-27.4658	2.44141	26.2451	96.4355	197.144	332.642	473.022	654.907
126.2	-74.4629	-72.6318	-46.9971	-47.6074	-40.2832	-25.6348	-3.05176	28.6865	99.4873	201.416	333.862	474.854	655.518
126.3	-75.6836	-65.3076	-51.2695	-43.335	-42.1143	-17.7002	-0.610352	25.6348	101.318	198.975	333.862	472.412	664.673
126.4	-67.749	-64.6973	-54.3213	-45.7764	-30.5176	-29.9072	-4.27246	24.4141	98.877	201.416	327.148	476.074	657.959
126.5	-70.8008	-61.6455	-43.9453	-39.0625	-30.5176	-24.4141	-14.6484	30.5176	92.1631	198.975	333.252	473.633	659.18
126.6	-68.9697	-62.8662	-53.7109	-42.7246	-37.2314	-29.2969	-5.49316	34.79	92.7734	202.637	338.135	470.581	669.556
126.7	-72.6318	-61.6455	-53.7109	-42.7246	-34.79	-32.959	-0.610352	34.79	100.708	207.52	345.459	478.516	661.011
126.8	-70.1904	-54.3213	-53.7109	-45.7764	-33.5693	-29.9072	-2.44141	34.79	105.591	206.909	336.914	484.009	668.335
126.9	-64.6973	-57.373	-51.2695	-47.6074	-37.2314	-25.0244	-7.32422	37.8418	104.98	206.909	334.473	477.905	670.776
127	-57.373	-65.3076	-60.4248	-41.5039	-32.959	-32.3486	-10.9863	39.0625	106.812	208.74	333.252	482.178	668.945
127.1	-70.1904	-65.3076	-54.3213	-45.7764	-35.4004	-22.583	-10.9863	37.2314	106.812	223.999	338.745	487.061	666.504
127.2	-70.8008	-57.9834	-48.8281	-42.7246	-35.4004	-22.583	0	38.4521	104.98	214.233	334.473	483.398	673.828
127.3	-64.6973	-65.918	-47.6074	-50.6592	-34.79	-31.1279	-7.93457	32.959	100.708	213.623	332.642	491.333	671.387
127.4	-67.1387	-64.0869	-51.2695	-42.1143	-39.6729	-27.4658	-7.32422	36.0107	112.305	217.896	336.304	498.657	677.49
127.5	-70.8008	-62.8662	-47.6074	-36.6211	-36.6211	-25.6348	-3.05176	37.8418	103.149	213.623	339.966	499.268	672.607
127.6	-70.8008	-63.4766	-46.9971	-42.1143	-36.6211	-23.1934	-4.88281	33.5693	112.915	213.013	334.473	500.488	676.88
127.7	-75.6836	-65.3076	-41.5039	-43.335	-32.959	-29.2969	-4.88281	39.0625	109.863	219.727	341.187	491.943	676.88
127.8	-64.0869	-65.918	-50.6592	-42.1143	-36.6211	-29.2969	-10.376	32.959	105.591	217.896	337.524	499.878	684.204
127.9	-70.8008	-57.9834	-53.7109	-46.3867	-34.79	-26.2451	-5.49316	37.2314	111.084	219.727	340.576	499.878	687.256
128	-72.0215	-61.0352	-47.6074	-43.9453	-34.79	-31.7383	3.05176	34.1797	111.084	216.675	339.966	497.437	693.97
128.1	-77.5146	-64.6973	-47.6074	-48.2178	-37.2314	-18.3105	-2.44141	32.959	108.032	216.675	336.914	497.437	690.308
128.2	-70.8008	-64.0869	-51.2695	-39.6729	-31.7383	-21.9727	-4.88281	34.79	107.422	219.116	357.056	494.995	692.139
128.3	-73.2422	-63.4766	-50.6592	-39.0625	-40.2832	-30.5176	-1.83105	36.0107	114.136	223.389	354.004	499.878	697.021
128.4	-64.6973	-73.2422	-56.1523	-43.335	-34.1797	-28.0762	-0.610352	33.5693	114.746	223.389	351.562	501.709	695.19
128.5	-68.9697	-65.918	-50.6592	-42.1143	-33.5693	-28.6865	-0.610352	35.4004	115.356	214.844	357.056	505.371	708.008
128.6	-75.6836	-58.5938	-53.7109	-43.335	-37.2314	-27.4658	-3.66211	32.3486	109.253	224.609	361.328	503.54	705.566
128.7	-75.6836	-68.3594	-54.3213	-38.4521	-32.959	-25.0244	-3.66211	32.3486	108.032	222.778	355.225	510.254	705.566
128.8	-65.918	-61.0352	-44.5557	-47.6074	-39.6729	-22.583	5.49316	24.4141	112.305	220.947	358.887	510.254	714.111
128.9	-68.9697	-54.9316	-51.2695	-46.3867	-35.4004	-25.6348	3.05176	32.959	115.967	220.337	361.938	512.695	718.384
129	-76.9043	-64.0869	-45.7764	-40.8936	-30.5176	-24.4141	-0.610352	32.3486	116.577	223.999	366.821	511.475	721.436
129.1	-68.9697	-66.5283	-46.9971	-41.5039	-39.6729	-28.0762	3.05176	36.6211	113.525	218.506	365.601	510.864	723.877
129.2	-68.3594	-65.918	-54.9316	-43.9453	-38.4521	-26.8555	-0.610352	23.8037	116.577	219.727	366.211	513.306	721.436
129.3	-74.4629	-62.2559	-50.0488	-42.7246	-36.0107	-34.1797	0.610352	31.1279	120.239	223.999	363.77	518.188	729.98
129.4	-75.6836	-64.0869	-50.0488	-46.9971	-37.2314	-31.1279	2.44141	33.5693	112.305	228.882	367.432	516.357	727.539
129.5	-69.5801	-65.918	-52.4902	-40.8936	-29.9072	-24.4141	6.10352	36.6211	117.188	231.323	374.756	515.137	731.201
129.6	-65.918	-62.2559	-50.0488	-46.3867	-33.5693	-22.583	1.83105	36.0107	119.019	231.934	380.859	523.682	734.253
129.7	-73.2422	-67.749	-48.2178	-39.0625	-34.1797	-28.0762	5.49316	34.79	116.577	233.154	377.808	520.02	736.694
129.8	-68.3594	-69.5801	-53.1006	-40.2832	-36.6211	-31.1279	3.05176	35.4004	115.967	233.154	378.418	520.02	738.525
129.9	-68.9697	-73.2422	-46.9971	-40.2832	-34.1797	-23.8037	4.88281	31.1279	123.901	229.492	380.859	529.785	740.967
[truncated: 10,201 more rows]

## Sheet: Q2-GW
0	-23.1934	-19.5312	-24.4141	-14.0381	-16.4795	-20.1416	-15.2588	-7.32422	-9.15527	-16.4795	-14.0381	-16.4795	-17.0898
[truncated: 11,500 more rows]

[truncated: 1 more sheets: GW 2018.03.22.0000]
