# Supplementary material for: Plural molecular and cellular mechanisms of pore domain KCNQ2 encephalopathy
Source: eLife. 2025 Jan 6;13:RP91204. doi: 10.7554/eLife.91204 (PMC11703504; doi:10.7554/eLife.91204)
Supplement: Figure 3—source data 1. [file elife-91204-fig3-data1.xlsx]

## Sheet: Sheet1
Homozygous
					Control									+ezogabine
																				KCNQ2 G256W primers:
			WT				G256W					WT				G256W
	Ipeak, pA/pF		AVG	SE			AVG	SE				AVG	SE			AVG	SE				Q2-G256W-F		gcagagaaaTgggagaacgaccactttgacacctac
	-80		-0.489808	0.160501			-0.280729	0.177345				-0.356672	0.214			-0.257174	0.272725				Q2-G256W-R		ttctcccAtttctctgccaagtacaccaggaacgag
	-70		0.216656	0.247897			-0.123695	0.198423				-0.165173	0.201352			0.170885	0.305181
	-60		-0.2442	0.245773			-0.358065	0.200015				0.688925	0.360393			0.215882	0.225206
	-50		-0.0918955	0.216228			-0.275884	0.207038				3.68572	1.34361			0.2266	0.25988
	-40		-0.395219	0.257662			-0.201714	0.322586				7.96256	2.78995			0.414696	0.367342
	-30		1.27605	0.892435			-0.303352	0.250467				13.6807	4.70988			1.26628	0.397571
	-20		4.69017	2.2672			0.797181	0.393127				17.1227	6.15782			1.97228	0.612449
	-10		9.98929	4.04104			1.13155	0.410813				21.3598	7.64223			1.64396	0.694909
	0		13.864	5.27074			1.76549	0.319699				23.5675	8.50405			2.10982	0.584275
	10		19.2423	6.34259			1.41744	0.529332				26.8441	9.76169			1.48641	0.777468
	20		20.6378	7.35461			3.54903	0.523064				29.0076	10.2766			1.48421	0.956682
	30		25.6596	7.62983			4.09882	0.854353				30.9743	10.6847			2.65515	1.06917
	40		29.2646	7.62949			5.61563	0.782741				32.9809	11.0863			5.03062	0.737862
	n =		21				28					17				24
Heterozygous
					Control									+ezogabine
			WT+WT				G256W+WT					WT+WT				G256W+WT
	Ipeak, pA/pF		AVG	SE			AVG	SE				AVG	SE			AVG	SE
	-80		2.47665	0.424503			1.83254	0.695878				0.267307	0.325916			-0.114571	0.479096
	-70		1.43724	0.367106			1.05168	0.496351				-0.309703	0.320839			-1.0335	0.531029
	-60		1.132	0.335979			0.707434	0.437507				0.0959047	0.301937			-0.442659	0.547849
	-50		0.341681	0.307732			0.0153449	0.426122				1.30408	0.475491			-0.507545	0.554127
	-40		0.296641	0.311382			-0.412613	0.368656				6.73716	1.30399			1.7711	0.710995
	-30		-0.464592	0.298615			-1.1036	0.319598				14.7367	2.64688			5.81006	1.41774
	-20		0.286629	0.322329			-0.598694	0.398249				24.6087	4.07568			10.9672	2.29709
	-10		3.61168	0.71385			0.826366	0.739418				33.8702	5.46846			15.5551	3.21321
	0		9.5233	1.56961			3.86596	1.18496				42.569	6.90545			19.881	4.10235
	10		16.1648	2.54465			6.91984	1.69791				50.7515	8.21324			24.0388	4.90152
	20		22.2141	3.44452			9.44586	1.99147				58.0709	9.27901			28.1544	5.56839
	30		27.2047	4.26356			11.579	2.32609				64.494	10.2605			31.4638	6.21539
	40		31.8463	4.93791			14.1021	2.52382				69.3927	11.0095			34.8453	6.64811
	n =		60				40					50				31
	from WT										from control
	ΔV½, mV		0	0.569683			-0.0547143	0.99179			ΔV½, mV	-34.5262	0.822663			-33.8843	0.889065
	k/kWT		1	0.035702			0.813163	0.0581594			k/kcontrol	1.22048	0.0313704			1.54824	0.0536139
			42				15					36				19
			G256W				WT+WT				G256W+WT
	Δcurrent, pA/pF		AVG	SE			AVG	SE			AVG	SE
	-80		0.0235549	0.272725			-2.20934	0.325916			-1.94711	0.479096
	-70		0.29458	0.305181			-1.74694	0.320839			-2.08518	0.531029
	-60		0.573947	0.225206			-1.03609	0.301937			-1.15009	0.547849
	-50		0.502484	0.25988			0.962396	0.475491			-0.522889	0.554127
	-40		0.616409	0.367342			6.44052	1.30399			2.18372	0.710995
	-30		1.56963	0.397571			15.2013	2.64688			6.91366	1.41774
	-20		1.1751	0.612449			24.3221	4.07568			11.5659	2.29709
	-10		0.512403	0.694909			30.2585	5.46846			14.7287	3.21321
	0		0.344323	0.584275			33.0457	6.90545			16.0151	4.10235
	10		0.0689652	0.777468			34.5868	8.21324			17.119	4.90152
	20		-2.06482	0.956682			35.8569	9.27901			18.7086	5.56839
	30		-1.44366	1.06917			37.2893	10.2605			19.8848	6.21539
	40		-0.585018	0.737862			37.5464	11.0095			20.7432	6.64811
	n =		24				50				31
