# Supplementary material for: Plural molecular and cellular mechanisms of pore domain KCNQ2 encephalopathy
Source: eLife. 2025 Jan 6;13:RP91204. doi: 10.7554/eLife.91204 (PMC11703504; doi:10.7554/eLife.91204)
Supplement: Figure 4—figure supplement 2—source data 1. [file elife-91204-fig4-figsupp2-data1.xlsx]

## Sheet: Sheet1
Lane	Genotype	28kD Signal	Normalized signal
1	WT	0.168	1.16667
2	WT	0.162	1.125
3	WT	0.102	0.708333
4	E254fs	0.122	0.847222
5	E254fs	0.0905	0.628472
6	E254fs	0.18	1.25
