# Supplementary material for: Plural molecular and cellular mechanisms of pore domain KCNQ2 encephalopathy
Source: eLife. 2025 Jan 6;13:RP91204. doi: 10.7554/eLife.91204 (PMC11703504; doi:10.7554/eLife.91204)
Supplement: Figure 4—source data 1. [file elife-91204-fig4-data1.xlsx]

## Sheet: Weight
Cage	Litter	Sex	Genotype	Tattoo ID	Ear Punch	Weight Day 4	Weight Day 5	Weight Day 6	Weight Day 7	Weight Day 8	Weight Day 9	Weight Day 10	Weight Day 11	Weight Day 12	Weight Day 13	Weight Day 14		Genotype	4	5	6	7	8	9	10	11	12	13	14
131	3	F	WT	Mouse 1	1L	NA	NA	3	3.39	4.12	4.58	4.73	5.22	5.53	5.95	6.28		WT	2.645	2.88111	3.50941	4.13353	4.65647	5.14	5.67077	6.28765	6.79769	6.89667	7.4825
131	3	F	WT	Mouse 2	1R	NA	NA	3.06	4.36	4.23	4.29	5.06	5.32	5.74	6.21	6.27		Het	2.304	2.768	3.36333	3.825	4.3725	4.93455	5.45636	5.91	6.2625	6.79727	7.15583
131	3	F	Het	Mouse 3	2L	NA	NA	3.22	3.71	4.04	4.32	4.91	5.4	5.58	6.09	6.4
131	3	F	Het	Mouse 4	2R	NA	NA	3.31	3.66	4.1	4.65	5.1	5.59	6	6.38	6.68		WT SEM	0.199946	0.135968	0.109052	0.11544	0.127195	0.188832	0.194021	0.167719	0.254461	0.379235	0.303592
131	3	F	Het	Mouse 5	LR	NA	NA	3.65	4.14	4.49	5.05	5.55	6.08	6.48	6.97	7.12		Het SEM	0.170223	0.246422	0.136495	0.149876	0.153317	0.200732	0.203694	0.192366	0.224345	0.249848	0.240298
131	3	M	Het	Mouse 6	1L	NA	NA	3.69	4.19	4.71	5.04	5.87	6.26	6.46	6.88	6.97
131	3	M	Het	Mouse 7	1R	NA	NA	3.39	3.81	4.07	4.58	4.95	5.35	5.67	6.03	6.25		WT M	2.625	2.916	3.59286	4.20429	4.75714	5.34	5.83167	6.34714	6.838	6.935	7.43833
131	3	M	Het	Mouse 8	2L	NA	NA	3.42	3.63	4.69	5.43	5.59	6.21	6	7.32	7.31		Het M	2.32	2.755	3.406	3.846	4.456	5.05	5.528	5.978	6.294	6.882	7.13
131	3	M	WT	Mouse 9	2R	NA	NA	3.41	3.88	4.16	4.97	5.41	5.45	5.92	6.51	6.82
131	3	F	WT	Mouse 10	2L1R	NA	NA	3.85	3.8	4.23	4.55	5.2	6.2	6.67	6.43	6.59		WT M SEM	0.210812	0.120067	0.152608	0.154579	0.184103	0.194594	0.215351	0.22529	0.382667	0.647154	0.641703
142	1	M	WT	Mouse 1	1L	NA	2.75	3.67	4.2	4.8	5.4	6	6.35	NA	NA	7.66		Het M SEM	0.42	0.435	0.224201	0.251567	0.237857	0.276188	0.289074	0.315934	0.359939	0.364725	0.385318
142	1	F	WT	Mouse 2	1L	NA	2.59	3.09	3.7	4.1	4.7	5.25	5.71	NA	NA	6.88
142	1	F	WT	Mouse 3	1R	NA	2.6	3.2	4.12	4.56	5.3	6	6.37	NA	NA	7.86
131	5	M	WT	Mouse 1	1L	2.35	2.75	3.19	3.88	4.37	5.07	5.52	6.14	6.55	5.62	4.93		WT F	2.685	2.8375	3.451	4.084	4.586	4.96857	5.53286	6.246	6.7725	6.866	7.509
131	5	F	Het	Mouse 2	1L	2.22	2.61	2.96	3.44	4.12	4.61	5.28	5.94	6.25	6.66	7.13		Het F	2.29333	2.77667	3.33286	3.81	4.31286	4.83833	5.39667	5.86143	6.24	6.72667	7.17429
131	5	M	Het	Mouse 3	1R	1.9	2.32	2.6	3.06	3.75	4.34	4.84	5.18	5.72	6.18	6.62
131	5	M	WT	Mouse 4	2L	2.18	2.69	3.15	3.7	4.31	4.83	5.26	5.83	6.25	6.91	7.26		WT F SEM	0.575	0.292842	0.155409	0.168709	0.178152	0.307868	0.315954	0.246699	0.35755	0.51569	0.329108
131	5	F	Het	Mouse 5	1R	2	2.23	2.61	3.15	3.59	4.17	4.72	5	5.23	5.86	6.37		Het F SEM	0.194022	0.373155	0.185057	0.200926	0.213338	0.304657	0.30799	0.260434	0.310299	0.371498	0.332629
131	5	F	WT	Mouse 6	2L	2.11	2.45	2.89	3.49	4.11	4.68	5.27	5.71	6	6.91	7.28
143	2	M	WT	Mouse 1	1L	3	3.08	3.5	4.37	5	5.7	6.16	6.6	NA	NA	NA
143	2	M	WT	Mouse 2	1R	2.97	3.31	4	4.8	5.33	6.07	6.64	7.13	7.89	8.7	9.63
143	2	M	Het	Mouse 3	2L	2.74	3.19	3.93	4.54	5.06	5.86	6.39	6.89	7.62	8	8.5
143	2	F	WT	Mouse 4	1R	3.26	3.71	4.4	5.21	5.84	6.68	7.22	7.64	8.44	8.83	9.34
143	2	F	Het	Mouse 5	1L	2.66	3.49	4.14	4.8	5.4	6.23	6.82	7.19	7.81	8.4	8.89
130	5	F	WT	Mouse 1	1L	NA	NA	3.67	4.37	5	NA	NA	6.85	7.45	NA	8.35
130	5	F	WT	Mouse 2	1R	NA	NA	3.9	4.35	5	NA	NA	7.05	7.61	NA	8.61
130	5	F	Het	Mouse 3	2L	NA	NA	3.44	3.77	4.45	NA	NA	5.83	6.33	NA	7.63
130	5	F	WT	Mouse 4	2R	NA	NA	3.45	4.05	4.67	NA	NA	6.39	6.74	NA	7.63
130	5	M	WT	Mouse 5	1L	NA	NA	4.23	4.6	5.33	NA	NA	6.93	7.58	NA	8.33

## Sheet: Negative Geotaxis
Cage	Litter	Sex	Genotype	Tattoo ID	Ear Punch	Latency Day 4	Latency Day 5	Latency Day 6	Latency Day 7	Latency Day 8	Latency Day 9	Latency Day 10	Latency Day 11	Day Complete		Genotype	4	5	6	7	8	9	10	11
131	3	F	WT	Mouse 1	1L	NA	NA	30	30	30	13.58	11.95	Done	10		WT	26.95	24.4944	18.1623	16.99	20.9343	9.64923	13.8383	6.18
131	3	F	WT	Mouse 2	1R	NA	NA	15	30	30	24.45	24	Done	10		Het	25.478	18.7645	18.6173	18.6173	21.055	14.4791	10.4075	7.366
131	3	F	Het	Mouse 3	2L	NA	NA	30	30	15.15	30	14.41	6.75	11
131	3	F	Het	Mouse 4	2R	NA	NA	30	30	9.56	14.3	Done	Done	9		WT SEM	3.05	2.93431	2.90503	3.36329	4.3127	2.42243	4.36235	1.51899
131	3	F	Het	Mouse 5	LR	NA	NA	30	4.23	30	14	9.83	Done	10		Het SEM	4.522	6.0044	3.36819	3.65518	4.06638	2.68394	1.4189	0.902314
131	3	M	Het	Mouse 6	1L	NA	NA	30	30	11.62	10.62	Done	Done	9
131	3	M	Het	Mouse 7	1R	NA	NA	11	30	30	13.16	9.68	Done	10		Genotype	Day Complete
131	3	M	Het	Mouse 8	2L	NA	NA	30	30	30	20.25	7.71	Done	10		WT	8.30769
131	3	M	WT	Mouse 9	2R	NA	NA	30	30	30	30	30	19	12		Het	8.27273
131	3	F	WT	Mouse 10	2L1R	NA	NA	30	30	7.22	9.96	Done	Done	9
142	1	M	WT	Mouse 1	1L	NA	30	30	5.1	30	6.75	4.4	12.19	10
142	1	F	WT	Mouse 2	1L	NA	30	16.36	4.32	11.91	13.38	7.16	8	7
142	1	F	WT	Mouse 3	1R	NA	30	9.22	30	7.41	4.59	5.52	3.88	9
131	5	M	WT	Mouse 1	1L	30	30	30	6.2	NA	3.5	NA	4.29	9
131	5	F	Het	Mouse 2	1L	30	30	6.8	6.55	NA	2.85	NA	7.2	7
131	5	M	Het	Mouse 3	1R	7.39	6.33	8.78	8.78	NA	8.21	NA	7.61	5
131	5	M	WT	Mouse 4	2L	11.7	30	17.91	18.28	NA	3.95	NA	3.56	7
131	5	F	Het	Mouse 5	1R	30	4.69	7.61	6.91	NA	7.53	NA	4.47	6
131	5	F	WT	Mouse 6	2L	30	7	5.26	22.8	NA	1.96	NA	7.36	6
143	2	M	WT	Mouse 1	1L	30	30	8.13	7.61	NA	4.9	NA	6.29	7
143	2	M	WT	Mouse 2	1R	30	14.35	9.5	3.86	NA	6.16	NA	5.53	6
143	2	M	Het	Mouse 3	2L	30	30	17.11	4.27	NA	30	NA	6.36	7
143	2	F	WT	Mouse 4	1R	30	19.1	4.73	2.7	NA	2.26	NA	4.52	6
143	2	F	Het	Mouse 5	1L	30	30	5.11	24.05	NA	8.35	NA	11.19	7

## Sheet: Surface Righting
Cage	Litter	Sex	Genotype	Tattoo ID	Ear Punch	Latency Day 4	Latency Day 5	Latency Day 6	Latency Day 7	Latency Day 8	Latency Day 9	Latency Day 10	Latency Day 11		Genotype	4	5	6	7	8	9	10	11
131	3	F	WT	Mouse 1	1L	NA	NA	4	3.61	1.49	1.23	1.31	0.8		WT	11.9367	3.805	2.71364	2.31769	1.85714	1.33	1.24286	0.771111
131	3	F	WT	Mouse 2	1R	NA	NA	NA	4.22	0.76	1.46	1.73	0.58		Het	7.53667	3.14125	1.81636	1.81636	2.28167	1.96273	1.81167	1.118
131	3	F	Het	Mouse 3	2L	NA	NA	NA	1.24	1.5	1.53	0.91	0.51
131	3	F	Het	Mouse 4	2R	NA	NA	4.5	4.29	2.59	2.73	2.4	0.78		WT SEM	4.37299	1.00733	0.347375	0.448062	0.349964	0.177052	0.165497	0.0666681
131	3	F	Het	Mouse 5	LR	NA	NA	NA	3.86	2.45	2.07	1.18	0.86		Het SEM	1.04167	0.740163	0.420966	0.360102	0.436566	0.292292	0.392015	0.130999
131	3	M	Het	Mouse 6	1L	NA	NA	4	2.45	1.03	1.31	1.39	0.86
131	3	M	Het	Mouse 7	1R	NA	NA	5	1.31	4.11	3.18	3.48	0.7
131	3	M	Het	Mouse 8	2L	NA	NA	NA	1.07	2.01	2.76	1.51	0.98
131	3	M	WT	Mouse 9	2R	NA	NA	3	1.46	1.81	1.6	1.1	0.55
131	3	F	WT	Mouse 10	2L1R	NA	NA	2	1.27	1.38	0.98	0.86	NA
142	1	M	WT	Mouse 1	1L	NA	3.07	NA	1.75	3.3	2.03	1.06	1.3
142	1	F	WT	Mouse 2	1L	NA	7.66	5.52	4.28	1.31	1.31	0.73	0.62
142	1	F	WT	Mouse 3	1R	NA	5.61	2.47	5.96	2.95	3.03	1.91	0.58
131	5	M	WT	Mouse 1	1L	NA	1.15	1.53	1.4	NA	0.95	NA	0.86
131	5	F	Het	Mouse 2	1L	NA	NA	2.28	1.26	NA	0.65	NA	1.23
131	5	M	Het	Mouse 3	1R	6.49	3.16	2.01	1.15	NA	1.28	NA	1.5
131	5	M	WT	Mouse 4	2L	8.5	NA	2.53	1.26	NA	1.26	NA	0.88
131	5	F	Het	Mouse 5	1R	6.5	1.13	2.95	0.96	NA	3.43	NA	1.85
131	5	F	WT	Mouse 6	2L	6.69	1.91	2.56	1.15	NA	1.05	NA	0.74
143	2	M	WT	Mouse 1	1L	NA	7.91	2.23	1.08	NA	0.55	NA	0.43
143	2	M	WT	Mouse 2	1R	NA	1	2.45	1.41	NA	1.16	NA	0.9
143	2	M	Het	Mouse 3	2L	NA	4.74	2.33	0.91	NA	0.65	NA	0.48
143	2	F	WT	Mouse 4	1R	20.62	2.13	1.56	1.28	NA	0.68	NA	0.63
143	2	F	Het	Mouse 5	1L	9.62	3.19	2.06	1.48	NA	2	NA	0.53

## Sheet: Cliff Aversion
Cage	Litter	Sex	Genotype	Tattoo ID	Ear Punch	Latency Day 4	Latency Day 5	Latency Day 6	Latency Day 7	Latency Day 8	Latency Day 9	Latency Day 10	Latency Day 11		Genotype	4	5	6	7	8	9	10	11
131	3	F	WT	Mouse 1	1L	NA	NA	30	19.99	30	2.2	7.11	Done		WT	21.6467	15.2189	11.8046	7.74308	6.97714	4.56538	4.6075	5.6
131	3	F	WT	Mouse 2	1R	NA	NA	4	30	4.78	4.86	Done	Done		Het	30	13.4745	11.2055	11.2055	2.28667	1.99727	#DIV/0!	4.78
131	3	F	Het	Mouse 3	2L	NA	NA	30	4.25	1.92	1.92	Done	Done
131	3	F	Het	Mouse 4	2R	NA	NA	30	29.32	1.49	1.88	Done	Done		WT SEM	5.29964	4.71578	3.53938	2.66881	3.854	2.1834	0.889816	3.22843
131	3	F	Het	Mouse 5	LR	NA	NA	3	9.85	1.27	2.33	Done	Done		Het SEM	0	0.64172	3.99717	3.68328	0.709914	0.24022	#DIV/0!	1.6545
131	3	M	Het	Mouse 6	1L	NA	NA	30	30	1.63	0.75	Done	Done
131	3	M	Het	Mouse 7	1R	NA	NA	3	30	5.81	3.38	Done	Done
131	3	M	Het	Mouse 8	2L	NA	NA	3	5.39	1.6	2.38	Done	Done
131	3	M	WT	Mouse 9	2R	NA	NA	30	21.13	2.36	2.01	Done	Done
131	3	F	WT	Mouse 10	2L1R	NA	NA	3	1.24	2.06	1.13	Done	Done
142	1	M	WT	Mouse 1	1L	NA	0.68	30	2.05	3.86	1.26	3.58	3.85
142	1	F	WT	Mouse 2	1L	NA	2.3	9.55	6.59	3.3	2.98	4.61	30
142	1	F	WT	Mouse 3	1R	NA	1.79	2.33	2.63	2.48	7.63	3.13	10.45
131	5	M	WT	Mouse 1	1L	30	5.02	30	1.51	NA	1.55	NA	0.91
131	5	F	Het	Mouse 2	1L	30	2.92	9.6	6.86	NA	2.63	NA	1.54
131	5	M	Het	Mouse 3	1R	30	3.67	1.48	0.98	NA	1.28	NA	6.11
131	5	M	WT	Mouse 4	2L	3.32	30	3.11	3.66	NA	30	NA	1.3
131	5	F	Het	Mouse 5	1R	30	2.32	30	4.38	NA	1.23	NA	9.36
131	5	F	WT	Mouse 6	2L	30	7.18	3.41	1.31	NA	2.45	NA	2.3
143	2	M	WT	Mouse 1	1L	30	30	2.23	0.89	NA	1.41	NA	0.5
143	2	M	WT	Mouse 2	1R	30	30	2.25	1.4	NA	0.79	NA	0.51
143	2	M	Het	Mouse 3	2L	30	0.5	3.73	1.2	NA	2.83	NA	0.45
143	2	F	WT	Mouse 4	1R	6.56	30	3.58	8.26	NA	1.08	NA	0.58
143	2	F	Het	Mouse 5	1L	30	0.5	4.41	1.03	NA	1.36	NA	6.44
