# Supplementary material for: Plural molecular and cellular mechanisms of pore domain KCNQ2 encephalopathy
Source: eLife. 2025 Jan 6;13:RP91204. doi: 10.7554/eLife.91204 (PMC11703504; doi:10.7554/eLife.91204)
Supplement: Figure 5—figure supplement 1—source data 1. [file elife-91204-fig5-figsupp1-data1.xlsx]

## Sheet: 1st action potential delay
WT	G256W/+
254.42	138.32
980.46	141.38
201.38	203.18
105.82	731.16
342.1	544.84
213.18	775.08
174.28	368.34
183.78	104.44
124.26	228.76
539.5	144.14
348.92	315.48
836.3	88.52
395.28	556.96
116.84	633.74
639.48	362.78
716.68	244.1

## Sheet: Action potential number
Current Injection	WT P12-15																G256W P13-15
25	0	0	0	5	0	1	2	0	0	0	0	0	0	0	0	0	0	0	0	0	0	0	0	0	0	0	0	0	11	0	0	0
50	0	4	5	9	0	6	7	1	6	5	0	0	3	0	0	1	0	0	6	0	8	11	4	2	0	0	0	0	28	4	0	0
75	7	9	8	12	3	9	11	6	9	15	3	0	7	0	0	7	0	3	10	4	14	20	15	6	0	1	3	0	31	10	0	8
100	11	13	9	14	5	11	15	9	13	21	7	1	9	4	0	10	2	7	14	9	20	26	22	9	1	9	8	5	35	11	5	14
125	13	16	11	18	6	14	18	10	15	25	10	5	11	8	0	15	6	10	18	12	22	31	27	11	4	14	11	9	37	19	9	15
150	16	19	13	22	6	16	23	11	16	29	13	8	14	11	0	16	11	13	22	13	26	34	31	14	6	20	13	12	40	23	15	18
175	20	21	13	25	7	18	23	12	18	32	16	11	16	15	2	19	14	16	26	15	29	37	31	16	8	24	16	14	43	26	20	20
200	23	24	16	28	8	21	25	14	20	34	18	13	17	18	2	21	18	19	29	17	32	41	35	20	10	26	18	16	45	29	23	24
225	26	27	17	32	9	23	24	15	22	36	21	15	19	22	5	23	21	20	33	19	33	43	36	22	12	30	23	18	47	31	23	27
250	30	30	19	34	9	26	29	16	22	38	23	16	21	24	7	27	24	23	35	20	35	45	39	25	15	32	26	20	48	33	26	28
275	34	33	19	37	11	26	25	16	21	40	25	17	22	27	10	28	27	26	38	22	37	46	41	27	15	35	28	23	49	34	29	31
300	39	34	21	39	11	27	26	19	19	42	26	20	24	31	12	30	29	28	40	25	38	47	43	28	18	38	31	25	51	37	32	33
325	43	36	23	40	12	26	31	19	18	44	30	22	26	34	16	32	33	30	42	26	40	50	45	31	20	40	33	27	52	37	36	34

## Sheet: Resting membrane potential
WT	G256W/+
-57.0501	-64.1573
-52.3723	-61.9549
-60.9675	-51.1468
-66.1455	-52.8451
-57.1577	-60.1636
-61.9958	-60.7114
-61.6307	-53.5917
-60.0052	-58.977
-66.4021	-66.7184
-63.0771	-60.3963
-58.7348	-49.2977
-58.4698	-55.744
-59.0671	-62.9681
-57.9395	-62.5767
-58.4811	-61.0103
-65.1799	-66.2354

## Sheet: Action potential amplitude
WT	G256W/+
102.648	103.245
114.627	104.625
103.204	98.9016
104.505	112.032
102.503	110.714
108.847	102.152
93.38	105.755
104.395	102.857
98.6533	108.347
100.946	104.122
103.117	110.02
110.223	108.629
106.157	102.493
105.402	104.686
112.646	103.418
104.087	101.915

## Sheet: Action potential half width
WT	G256W/+
1.26891	1.29326
1.25105	1.15281
1.24729	1.08765
1.15063	1.23402
1.28769	1.25085
1.30332	1.36054
1.61287	1.33911
1.4121	1.40769
1.71818	1.36311
1.675	1.18005
1.13696	1.16227
1.34561	1.27363
1.51675	1.51716
1.28818	1.33339
1.10891	0.953609
1.00484	1.20453

## Sheet: Action potential rate of rise
WT	G256W/+
308.868	288.11
371.166	344.512
324.695	295.732
357.798	352.134
260.671	358.896
321.101	286.585
195.719	289.634
288.11	264.526
198.777	314.985
224.085	357.798
355.183	417.683
277.439	425.305
339.939	228.659
282.875	282.012
364.329	385.671
347.561	305.81

## Sheet: Action potential rate of decay
WT	G256W/+
-71.8654	-67.2783
-73.1707	-73.1707
-70.1219	-82.3171
-74.9235	-71.6463
-70.1219	-71.6463
-70.1219	-62.5
-54.878	-65.5488
-61.1621	-64.2202
-56.4024	-64.0244
-50.3049	-76.2195
-76.2195	-74.9235
-70.1219	-68.8073
-59.816	-59.4512
-73.3945	-64.0244
-86.8902	-94.5122
-91.4634	-67.2783

## Sheet: Somatic input resistance
Current Injection	WT P12-15																G256W P13-15
-100	143.586	143.889	201.079	259.664	162.268	198.396	137.84	176.333	243.14	149.272	138.976	103.306	175.013	113.428	117.516	173.622	125.663	122.786	162.679	147.147	132.082	157.645	136.397	201.809	128.411	117.535	140.486	135.569	261.753	119.552	96.1838	144.352
-75	154.53	154.139	223.73	278.11	167.166	221.316	141.049	184.991	249.534	155.665	138.1	109.675	190.917	110.111	121.607	185.207	128.851	123.658	170.276	151.132	142.283	165.746	139.823	214.512	131.182	121.937	144.19	142.433	276.939	122.147	95.3104	156.548
-50	149.578	154.117	213.715	303.792	169.995	231.343	151.27	195.128	276.912	171.433	142.467	121.115	221.648	114.057	123.999	203.572	133.657	135.329	182.596	149.356	159.887	175.236	143.753	241.606	131.821	132.522	147.305	156.418	359.755	132.565	104	163.575
-25	183.601	156.941	242.102	311.386	171.194	264.346	170.06	207.993	266.947	189.623	141.493	126.439	236.199	88.9173	126.279	217.473	150.236	135.077	192.703	143.213	165.751	180.97	155.461	272.358	141.492	135.485	159.817	185.971	378.998	146.293	101.354	182.112
