# Supplementary material for: Plural molecular and cellular mechanisms of pore domain KCNQ2 encephalopathy
Source: eLife. 2025 Jan 6;13:RP91204. doi: 10.7554/eLife.91204 (PMC11703504; doi:10.7554/eLife.91204)
Supplement: Figure 7—source data 1. [file elife-91204-fig7-data1.xlsx]

## Sheet: Metadata
Mouse ID	Strain	Sex	RNA Tube ID	Age (Days)	Genotype	Brain Weight (g)
A120.1-2	G256W	F	W1	21	WT	0.44
A120.1-4	G256W	F	W2	21	WT	0.42
A120.3-11	G256W	F	W3	21	WT	0.43
A120.3-2	G256W	M	W4	21	WT	0.41
A120.3-4	G256W	M	W5	21	WT	0.42
A120.3-5	G256W	M	W6	21	WT	0.42
D105.2-3	E254fs	F	D1	21	Het	0.41
D100.5-2	E254fs	F	D2	21	Het	0.42
D105.4-5	E254fs	F	D3	22	Het	0.43
D100.5-1	E254fs	M	D4	21	Het	0.44
D105.4-4	E254fs	M	D5	22	Het	0.41
D105.6-1	E254fs	M	D6	20	Het	0.36
T111.4-6	G256W	F	G1	21	Het	0.44
T111.6-4	G256W	F	G2	21	Het	0.42
T111.6-5	G256W	F	G3	21	Het	0.43
T111.4-4	G256W	M	G5	21	Het	0.44
T111.4-5	G256W	M	G6	21	Het	0.44

## Sheet: Hip Kcnq2
Mouse ID	Strain	Sex	RNA Tube ID	Age (Days)	Genotype	Fold Change
A120.1-2	G256W	F	W1	21	WT	0.952605		Genotype	Average Fold Change	SEM
A120.1-4	G256W	F	W2	21	WT	0.92191		WT	1.00129	0.0247816
A120.3-11	G256W	F	W3	21	WT	1.02594		E254fs	0.71983	0.0316775
A120.3-2	G256W	M	W4	21	WT	0.997968		G256W/+	1.00201	0.0300698
A120.3-4	G256W	M	W5	21	WT	1.04116
A120.3-5	G256W	M	W6	21	WT	1.06817
D105.2-3	E254fs	F	D1	21	Het	0.680526
D100.5-2	E254fs	F	D2	21	Het	0.681809
D105.4-5	E254fs	F	D3	22	Het	0.702937
D100.5-1	E254fs	M	D4	21	Het	0.660979
D105.4-4	E254fs	M	D5	22	Het	0.720043
D105.6-1	E254fs	M	D6	20	Het	0.872685
T111.4-6	G256W	F	G1	21	Het	1.05891
T111.6-4	G256W	F	G2	21	Het	0.891333
T111.6-5	G256W	F	G3	21	Het	0.98714
T111.4-4	G256W	M	G5	21	Het	1.0396
T111.4-5	G256W	M	G6	21	Het	1.03305

## Sheet: One sample ttest hip Q2
E254fs Kcnq2 fold change		Sample size	6
0.680526		Sample mean	0.71983
0.681809		Sample standard deviation	0.0775936
0.702937		Sample SEM	0.0129323
0.660979		Degrees of freedom	5
0.720043		Hypothesized mean	0.5
0.872685		T statistic t	16.9986
		P-value	1.28906e-05

## Sheet: DeltaDelta CT Hip Kcnq2
Sample Name	Sex	Delta Ct		Sample Name	Sex	DeltaCt	Stdev Tech Reps	DeltaDeltaCT	Fold Change
W1	F	3.83276		W1	F	3.84663	0.0655046	0.0700499	0.952605
W1	F	3.78917		W2	F	3.89389	0.0115135	0.117303	0.92191
W1	F	3.91796		W3	F	3.73964	0.0291642	-0.0369447	1.02594
W2	F	3.90117		W4	M	3.77952	0.0421787	0.00293414	0.997968
W2	F	3.88061		W5	M	3.71839	0.0297336	-0.0581977	1.04116
W2	F	3.89988		W6	M	3.68144	0.0296785	-0.0951443	1.06817
W3	F	3.73917		D1	F	4.33186	0.020505	0.555277	0.680526
W3	F	3.76903		D2	F	4.32914	0.0377415	0.552561	0.681809
W3	F	3.71071		D3	F	4.28511	0.0320498	0.508532	0.702937
W4	M	3.82457		D4	M	4.37391	0.0209427	0.597323	0.660979
W4	M	3.74096		D5	M	4.25043	0.0389788	0.473845	0.720043
W4	M	3.77302		D6	M	3.97305	0.0418173	0.196467	0.872685
W5	M	3.70637		G1	F	3.69401	0.00638002	-0.0825755	1.05891
W5	M	3.69654		G2	F	3.94255	0.0276025	0.165963	0.891333
W5	M	3.75225		G3	F	3.79526	0.0153011	0.0186729	0.98714
W6	M	3.67386		G5	M	3.72056	0.0136306	-0.0560265	1.0396
W6	M	3.65629		G6	M	3.72968	0.0185665	-0.0469055	1.03305
W6	M	3.71417
D1	M	4.32683
D1	F	4.31434
D1	F	4.35441
D2	F	4.3719
D2	F	4.31507
D2	F	4.30046
D3	F	4.25135
D3	F	4.31512
D3	F	4.28887
D4	F	4.38523
D4	M	4.34974
D4	M	4.38675
D5	M	4.22427
D5	M	4.23179
D5	M	4.29523
D6	M	4.0198
D6	M	3.93921
D6	M	3.96014
G1	M	3.70137
G1	M	3.69017
G1	F	3.69048
G2	F	3.9167
G2	F	3.97162
G2	F	3.93931
G3	F	3.8019
G3	F	3.77776
G3	F	3.80611
G5	M	3.70482
G5	M	3.72863
G5	M	3.72822
G6	M	3.71751
G6	M	3.72048
G6	M	3.75105

## Sheet: Hip Kcnq2 CT QC
Animal	Technical replicate number	Target	Cycle threshold (CT)		Animal	Genotype	Average Kcnq2 CT	Average Gapdh CT	SD Kcnq2 CT	SD Gapdh CT		Genotype	Average Kcnq2 CT	SEM Kcnq2 CT
W1	1	Gapdh	18.9858		W1	WT	22.8092	18.9626	0.122679	0.0614118		WT	22.84	0.0593383
W1	2	Kcnq2	22.8186		W2	WT	22.692	18.7981	0.104963	0.109583		E254fs/+	23.4502	0.0485335
W1	3	Gapdh	18.8929		W3	WT	22.7126	18.973	0.106704	0.0892967		G256W/+	22.9188	0.0325714
W1	1	Kcnq2	22.6821		W4	WT	22.7887	19.0092	0.0459191	0.0785862
W1	2	Gapdh	19.009		W5	WT	23.026	19.3076	0.00176443	0.0297601		Genotype	Average Gapdh CT	SEM Gapdh CT
W1	3	Kcnq2	22.9269		W6	WT	23.0113	19.3298	0.0657303	0.0917109		WT	19.0634	0.0860755
W2	1	Gapdh	18.6725		D1	E254fs/+	23.4553	19.1235	0.194957	0.184902		E254fs/+	19.193	0.0492207
W2	2	Kcnq2	22.5737		D2	E254fs/+	23.6311	19.3019	0.0788633	0.0541291		G256W/+	19.1424	0.0506536
W2	3	Gapdh	18.8481		D3	E254fs/+	23.4678	19.1826	0.0146729	0.0220649
W2	1	Kcnq2	22.7287		D4	E254fs/+	23.3679	18.994	0.0437537	0.0266753
W2	2	Gapdh	18.8739		D5	E254fs/+	23.4981	19.2476	0.0169391	0.0267541
W2	3	Kcnq2	22.7737		D6	E254fs/+	23.2812	19.3082	0.0152692	0.0303418
W3	1	Gapdh	18.8825		G1	G256W/+	22.8203	19.1263	0.0228491	0.0204012
W3	2	Kcnq2	22.6217		G2	G256W/+	22.9266	18.984	0.0223034	0.017799
W3	3	Gapdh	19.0611		G3	G256W/+	22.8732	19.0779	0.00273983	0.0130552
W3	1	Kcnq2	22.8301		G5	G256W/+	22.9407	19.2202	0.0251196	0.0318639
W3	2	Gapdh	18.9754		G6	G256W/+	23.0334	19.3037	0.0560959	0.0379706
W3	3	Kcnq2	22.6861
W4	1	Gapdh	18.9189
W4	2	Kcnq2	22.7434
W4	3	Gapdh	19.0464
W4	1	Kcnq2	22.7873
W4	2	Gapdh	19.0622
W4	3	Kcnq2	22.8353
W5	1	Gapdh	19.3215
W5	2	Kcnq2	23.0279
W5	3	Gapdh	19.3278
W5	1	Kcnq2	23.0244
W5	2	Gapdh	19.2734
W5	3	Kcnq2	23.0257
W6	1	Gapdh	19.3092
W6	2	Kcnq2	22.983
W6	3	Gapdh	19.4301
W6	1	Kcnq2	23.0864
W6	2	Gapdh	19.2502
W6	3	Kcnq2	22.9644
D1	1	Gapdh	19.2896
D1	2	Kcnq2	23.6165
D1	3	Gapdh	18.9243
D1	1	Kcnq2	23.2386
D1	2	Gapdh	19.1565
D1	3	Kcnq2	23.5109
D2	1	Gapdh	19.3192
D2	2	Kcnq2	23.6911
D2	3	Gapdh	19.3453
D2	1	Kcnq2	23.6604
D2	2	Gapdh	19.2413
D2	3	Kcnq2	23.5417
D3	1	Gapdh	19.1999
D3	2	Kcnq2	23.4512
D3	3	Gapdh	19.1578
D3	1	Kcnq2	23.4729
D3	2	Gapdh	19.1903
D3	3	Kcnq2	23.4792
D4	1	Gapdh	18.984
D4	2	Kcnq2	23.3692
D4	3	Gapdh	18.9737
D4	1	Kcnq2	23.3235
D4	2	Gapdh	19.0242
D4	3	Kcnq2	23.4109
D5	1	Gapdh	19.2734
D5	2	Kcnq2	23.4977
D5	3	Gapdh	19.2495
D5	1	Kcnq2	23.4813
D5	2	Gapdh	19.22
D5	3	Kcnq2	23.5152
D6	1	Gapdh	19.2781
D6	2	Kcnq2	23.2979
D6	3	Gapdh	19.3388
D6	1	Kcnq2	23.278
D6	2	Gapdh	19.3077
D6	3	Kcnq2	23.2679
G1	1	Gapdh	19.1327
G1	2	Kcnq2	22.8341
G1	3	Gapdh	19.1427
G1	1	Kcnq2	22.8329
G1	2	Gapdh	19.1035
G1	3	Kcnq2	22.7939
G2	1	Gapdh	18.9842
G2	2	Kcnq2	22.9009
G2	3	Gapdh	18.9662
G2	1	Kcnq2	22.9378
G2	2	Gapdh	19.0018
G2	3	Kcnq2	22.9411
G3	1	Gapdh	19.0707
G3	2	Kcnq2	22.8726
G3	3	Gapdh	19.093
G3	1	Kcnq2	22.8707
G3	2	Gapdh	19.07
G3	3	Kcnq2	22.8761
G5	1	Gapdh	19.2448
G5	2	Kcnq2	22.9496
G5	3	Gapdh	19.2316
G5	1	Kcnq2	22.9603
G5	2	Gapdh	19.1842
G5	3	Kcnq2	22.9124
G6	1	Gapdh	19.2892
G6	2	Kcnq2	23.0067
G6	3	Gapdh	19.2752
G6	1	Kcnq2	22.9956
G6	2	Gapdh	19.3468
G6	3	Kcnq2	23.0979

## Sheet: CTX Kcnq2
Mouse ID	Strain	Sex	RNA Tube ID	Age (Days)	Genotype	Fold Change	Notes
A120.1-2	G256W	F	W1	21	WT	1.08874		Genotype	Average Fold Change	SEM
A120.1-4	G256W	F	W2	21	WT	0.94559		WT	1.00443	0.0429337
A120.3-11	G256W	F	W3	21	WT	1.17161		E254fs	0.785957	0.0161909
A120.3-2	G256W	M	W4	21	WT	0.891896		G256W/+	1.09324	0.0605699
A120.3-4	G256W	M	W5	21	WT	0.94308
A120.3-5	G256W	M	W6	21	WT	0.985663
D105.2-3	E254fs	F	D1	21	Het	0.789896
D100.5-2	E254fs	F	D2	21	Het	0.718561
D105.4-5	E254fs	F	D3	22	Het	0.798552
D100.5-1	E254fs	M	D4	21	Het	0.824029
D105.4-4	E254fs	M	D5	22	Het	0.804723
D105.6-1	E254fs	M	D6	20	Het	0.77998
T111.4-6	G256W	F	G1	21	Het	1.17286
T111.6-4	G256W	F	G2	21	Het	0.970964
T111.6-5	G256W	F	G3	21	Het	1.0101
T111.4-4	G256W	M	G5	21	Het	2.40989	Outlier removed from analysis
T111.4-5	G256W	M	G6	21	Het	1.21902

## Sheet: CTX Kcnq2 G256W Grubbs test
G256W Kcnq2 fold change		Max	2.40989	=MAX(A2:A6)
1.17286		Mean	1.35657	=AVERAGE(A2:A6)
0.970964		Standard Deviation	0.598097	=STDEV(A2:A6)
1.0101		G	1.76112	=(D1-D2)/D3
2.40989
1.21902		Alpha	0.05
		Sample Size	5
		Significance value	0.01	=D6/D7
		Degrees of Freedom	3	=D7-2
		t-Critical Value	4.5407	=T.INV(1-D8,D9)
		G-Critical Value	0.964975	=(D7-1)*(D10/SQRT(D7*(D9*(D9+D10^2))))
		Test statistic G > G-Critical, thus maximum value is signifcant outlier

## Sheet: One sample ttest CTX Q2
E254fs Kcnq2 fold change		Sample size	6
0.789896		Sample mean	0.785957
0.718561		Sample standard deviation	0.036204
0.798552		Sample SEM	0.006034
0.824029		Degrees of freedom	5
0.804723		Hypothesized mean	0.5
0.77998		T statistic t	47.3909
		P-value	7.90242e-08

## Sheet: DeltaDelta CT CTX Kcnq2
Sample Name	Sex	Delta Ct		Sample Name	Sex	DeltaCt	Stdev Tech Reps	DeltaDeltaCT	Fold Change
W1	F	4.10057		W1	F	4.05284	0.0415732	-0.122653	1.08874
W1	F	4.02456		W2	F	4.2562	0.0257541	0.0807131	0.94559
W1	F	4.03338		W3	F	3.94699	0.00981493	-0.228494	1.17161
W2	F	4.27166		W4	M	4.34054	0.0588796	0.165052	0.891896
W2	F	4.22647		W5	M	4.26004	0.0134824	0.0845481	0.94308
W2	F	4.27048		W6	M	4.19632	0.0188796	0.0208338	0.985663
W3	F	3.93596		D1	F	4.51575	0.0139837	0.340266	0.789896
W3	F	3.95027		D2	F	4.6523	0.00987907	0.476817	0.718561
W3	F	3.95475		D3	F	4.50003	0.0166632	0.324541	0.798552
W4	M	4.39453		D4	M	4.45472	0.05163	0.279234	0.824029
W4	M	4.27776		D5	M	4.48892	0.00845941	0.313436	0.804723
W4	M	4.34933		D6	M	4.53398	0.0325259	0.358492	0.77998
W5	M	4.25743		G1	F	3.94546	0.00563437	-0.230032	1.17286
W5	M	4.24805		G2	F	4.218	0.0133909	0.0425101	0.970964
W5	M	4.27463		G3	F	4.161	0.00823777	-0.0144922	1.0101
W6	M	4.18359		G5	M	2.90652	0.0812095	-1.26896	2.40989
W6	M	4.18736		G6	M	3.88977	0.0168612	-0.285722	1.21902
W6	M	4.21801
D1	M	4.53148
D1	F	4.50471
D1	F	4.51107
D2	F	4.66315
D2	F	4.64381
D2	F	4.64996
D3	F	4.4808
D3	F	4.50919
D3	F	4.5101
D4	F	4.39553
D4	M	4.47819
D4	M	4.49045
D5	M	4.47919
D5	M	4.4945
D5	M	4.49308
D6	M	4.55891
D6	M	4.54584
D6	M	4.49719
G1	M	3.95173
G1	M	3.94083
G1	F	3.94381
G2	F	4.21741
G2	F	4.23168
G2	F	4.20491
G3	F	4.16607
G3	F	4.15149
G3	F	4.16543
G5	M	2.8763
G5	M	2.84476
G5	M	2.99851
G6	M	3.87393
G6	M	3.88788
G6	M	3.90749

## Sheet: Cortex Kcnq2 CT QC
Animal	Technical replicate number	Target	Cycle threshold (CT)		Animal	Genotype	Average Kcnq2 CT	Average Gapdh CT	SD Kcnq2 CT	SD Gapdh CT		Genotype	Average Kcnq2 CT	SEM Kcnq2 CT
W1	1	Gapdh	19.9977		W1	WT	24.0876	20.0347	0.0699154	0.0803692		WT	24.0186	0.206923
W1	2	Kcnq2	24.0983		W2	WT	23.2936	19.0374	0.0717816	0.0476816		E254fs/+	24.3615	0.260511
W1	3	Gapdh	20.1269		W3	WT	24.7479	20.8009	0.0863656	0.0958627		G256W/+	23.9749	0.288906
W1	1	Kcnq2	24.1515		W4	WT	24.3435	20.003	0.161348	0.123904		G256W/+ No G5	24.2644	0.165067
W1	2	Gapdh	19.9795		W5	WT	23.6828	19.4228	0.0227002	0.0360743
W1	3	Kcnq2	24.0129		W6	WT	23.9565	19.7602	0.0633876	0.0813559		Genotype	Average Gapdh CT	SEM Gapdh CT
W2	1	Gapdh	19.0835		D1	E254fs/+	24.5536	20.0379	0.0856073	0.0723692		WT	19.8432	0.245795
W2	2	Kcnq2	23.3551		D2	E254fs/+	24.9602	20.3078	0.0283534	0.0186126		E254fs/+	20.1323	0.202531
W2	3	Gapdh	18.9882		D3	E254fs/+	23.3952	20.6656	0.33747	0.157109		G256W/+	20.1507	0.14794
W2	1	Kcnq2	23.2147		D4	E254fs/+	24.7071	20.2524	0.11046	0.137909		G256W/+ No G5	20.2108	0.194302
W2	2	Gapdh	19.0404		D5	E254fs/+	24.8118	20.3229	0.104563	0.106939
W2	3	Kcnq2	23.3108		D6	E254fs/+	23.7413	19.2073	0.050872	0.0811706
W3	1	Gapdh	20.8995		G1	G256W/+	24.476	20.5305	0.10109	0.10663
W3	2	Kcnq2	24.8354		G2	G256W/+	24.5325	20.3145	0.0708769	0.0796096
W3	3	Gapdh	20.7953		G3	G256W/+	23.8063	19.6453	0.0907208	0.0831497
W3	1	Kcnq2	24.7455		G5	G256W/+	22.8169	19.9104	0.129806	0.086376
W3	2	Gapdh	20.708		G6	G256W/+	24.2429	20.3531	0.0425494	0.0261303
W3	3	Kcnq2	24.6628
W4	1	Gapdh	20.1347
W4	2	Kcnq2	24.5293
W4	3	Gapdh	19.9854
W4	1	Kcnq2	24.2632
W4	2	Gapdh	19.8888
W4	3	Kcnq2	24.2381
W5	1	Gapdh	19.4256
W5	2	Kcnq2	23.6831
W5	3	Gapdh	19.4574
W5	1	Kcnq2	23.7054
W5	2	Gapdh	19.3854
W5	3	Kcnq2	23.66
W6	1	Gapdh	19.8336
W6	2	Kcnq2	24.0172
W6	3	Gapdh	19.7742
W6	1	Kcnq2	23.9615
W6	2	Gapdh	19.6727
W6	3	Kcnq2	23.8908
D1	1	Gapdh	20.1075
D1	2	Kcnq2	24.6389
D1	3	Gapdh	19.963
D1	1	Kcnq2	24.4677
D1	2	Gapdh	20.0432
D1	3	Kcnq2	24.5542
D2	1	Gapdh	20.3292
D2	2	Kcnq2	24.9924
D2	3	Gapdh	20.2951
D2	1	Kcnq2	24.9389
D2	2	Gapdh	20.2992
D2	3	Kcnq2	24.9492
D3	1	Gapdh	20.8173
D3	2	Kcnq2	23.7041
D3	3	Gapdh	20.676
D3	1	Kcnq2	23.4464
D3	2	Gapdh	20.5036
D3	3	Kcnq2	23.035
D4	1	Gapdh	20.3718
D4	2	Kcnq2	24.7673
D4	3	Gapdh	20.1015
D4	1	Kcnq2	24.5796
D4	2	Gapdh	20.284
D4	3	Kcnq2	24.7744
D5	1	Gapdh	20.3718
D5	2	Kcnq2	24.851
D5	3	Gapdh	20.3966
D5	1	Kcnq2	24.8911
D5	2	Gapdh	20.2002
D5	3	Kcnq2	24.6933
D6	1	Gapdh	19.1678
D6	2	Kcnq2	23.7267
D6	3	Gapdh	19.1535
D6	1	Kcnq2	23.6993
D6	2	Gapdh	19.3007
D6	3	Kcnq2	23.7978
G1	1	Gapdh	20.4194
G1	2	Kcnq2	24.3712
G1	3	Gapdh	20.632
G1	1	Kcnq2	24.5729
G1	2	Gapdh	20.54
G1	3	Kcnq2	24.4838
G2	1	Gapdh	20.2514
G2	2	Kcnq2	24.4688
G2	3	Gapdh	20.2881
G2	1	Kcnq2	24.5198
G2	2	Gapdh	20.4039
G2	3	Kcnq2	24.6088
G3	1	Gapdh	19.7254
G3	2	Kcnq2	23.8914
G3	3	Gapdh	19.5594
G3	1	Kcnq2	23.7108
G3	2	Gapdh	19.6511
G3	3	Kcnq2	23.8165
G5	1	Gapdh	19.8114
G5	2	Kcnq2	22.6877
G5	3	Gapdh	19.9708
G5	1	Kcnq2	22.8156
G5	2	Gapdh	19.9488
G5	3	Kcnq2	22.9473
G6	1	Gapdh	20.3245
G6	2	Kcnq2	24.1985
G6	3	Gapdh	20.359
G6	1	Kcnq2	24.2469
G6	2	Gapdh	20.3758
G6	3	Kcnq2	24.2833

[truncated: 6 more sheets: Hip Kcnq3, DeltaDeltaCT Hip Kcnq3, Hip Kcnq3 CT QC, CTX Kcnq3, DeltaDeltaCT CTX Kcnq3, CTX Kcnq3 CT QC]
