# Supplementary material for: Plural molecular and cellular mechanisms of pore domain KCNQ2 encephalopathy
Source: eLife. 2025 Jan 6;13:RP91204. doi: 10.7554/eLife.91204 (PMC11703504; doi:10.7554/eLife.91204)
Supplement: Figure 7—source data 2. [file elife-91204-fig7-data2.xlsx]

## Sheet: Metadata
Mouse ID	Strain	Tube Label	DOB	DOD	Sex	Age (Days)	Genotype
T104.2-3	G256W	WF1	2020-04-06	2020-06-24	F	79	WT
A102.2-4	G256W	WF2	2020-03-08	2020-07-07	F	121	WT
187.4-3	G256W	WF3	2020-03-08	2020-07-14	F	128	WT
T103.1-3	G256W	WM1	2020-03-14	2020-07-20	M	128	WT
T102.1-5	G256W	WM2	2020-03-10	2020-06-24	M	106	WT
T104.1-1	G256W	WM3	2020-03-16	2020-07-08	M	114	WT
190.2-3	E254fs	DF1	2020-03-25	2020-07-16	F	113	Het
190.2-5	E254fs	DF2	2020-03-25	2020-07-16	F	113	Het
190.2-7	E254fs	DF3	2020-03-25	2020-07-16	F	113	Het
211.1-2	E254fs	DM1	2020-03-02	2020-07-08	M	128	Het
211.1-3	E254fs	DM2	2020-03-02	2020-07-08	M	128	Het
211.2-3	E254fs	DM3	2020-04-16	2020-07-16	M	91	Het
T102.1-1	G256W	GF1	2020-03-10	2020-06-24	F	106	Het
T102.1-3	G256W	GF2	2020-03-10	2020-06-24	F	106	Het
T102.1-6	G256W	GF3	2020-03-10	2020-06-24	F	106	Het
T104.1-3	G256W	GM1	2020-03-16	2020-07-20	M	126	Het
T102.1-2	G256W	GM2	2020-03-10	2020-06-24	M	106	Het
T102.1-4	G256W	GM3	2020-03-10	2020-06-24	M	106	Het

## Sheet: Hippocampus Kcnq2 Quant
Mouse ID	Strain	Tube Label	DOB	DOD	Sex	Age (Days)	Genotype	Fold Change
T102.1-1	G256W	GF1	2020-03-10	2020-06-24	F	106	Het	1.16826		Genotype	Average Fold Change	SEM
T102.1-3	G256W	GF2	2020-03-10	2020-06-24	F	106	Het	0.983642		WT	1.00179	0.0265563
T102.1-6	G256W	GF3	2020-03-10	2020-06-24	F	106	Het	0.805867		G256W	1.02255	0.0661223
190.2-3	E254fs	DF1	2020-03-25	2020-07-16	F	113	Het	0.493632		E254fs	0.628043	0.0353494
190.2-5	E254fs	DF2	2020-03-25	2020-07-16	F	113	Het	0.62108
190.2-7	E254fs	DF3	2020-03-25	2020-07-16	F	113	Het	0.716127
T104.1-3	G256W	GM1	2020-03-16	2020-07-20	M	126	Het	0.910661
T102.1-2	G256W	GM2	2020-03-10	2020-06-24	M	106	Het	1.02309
T102.1-4	G256W	GM3	2020-03-10	2020-06-24	M	106	Het	1.24379
211.1-2	E254fs	DM1	2020-03-02	2020-07-08	M	128	Het	0.58362
211.1-3	E254fs	DM2	2020-03-02	2020-07-08	M	128	Het	0.726227
211.2-3	E254fs	DM3	2020-04-16	2020-07-16	M	91	Het	0.627571
T104.2-3	G256W	WF1	2020-04-06	2020-06-24	F	79	WT	0.963912
A102.2-4	G256W	WF2	2020-03-08	2020-07-07	F	121	WT	1.00869
187.4-3	G256W	WF3	2020-03-08	2020-07-14	F	128	WT	0.901867
T103.1-3	G256W	WM1	2020-03-14	2020-07-20	M	128	WT	1.0651
T102.1-5	G256W	WM2	2020-03-10	2020-06-24	M	106	WT	1.0768
T104.1-1	G256W	WM3	2020-03-16	2020-07-08	M	114	WT	0.994346

## Sheet: One sample ttest Hip Q2
E254fs Kcnq2 fold change		Sample size	6
0.493632		Sample mean	0.628043
0.62108		Sample standard deviation	0.0865879
0.716127		Sample SEM	0.0144313
0.58362		Degrees of freedom	5
0.726227		Hypothesized mean	0.5
0.627571		T statistic t	8.87258
		P-value	0.000302476

## Sheet: DeltaDeltaCT Hip Kcnq2
DeltaCT	RNA ID		RNA ID	DeltaCt	DeltaDeltaCT	Fold Change
4.30956	GF1		GF1	4.35751	-0.224365	1.16826
4.37222	GF1		GF2	4.60567	0.0237942	0.983642
4.39074	GF1		GF3	4.89326	0.311386	0.805867
4.57115	GF2		DF1	5.60036	1.01849	0.493632
4.63309	GF2		DF2	5.26902	0.687148	0.62108
4.61275	GF2		DF3	5.06358	0.481712	0.716127
4.94486	GF3		GM1	4.71688	0.135014	0.910661
4.89611	GF3		GM2	4.54894	-0.0329342	1.02309
4.8388	GF3		GM3	4.26713	-0.314745	1.24379
5.6007	DF1		DM1	5.35877	0.776898	0.58362
5.55951	DF1		DM2	5.04338	0.461507	0.726227
5.64087	DF1		DM3	5.25402	0.67215	0.627571
5.27652	DF2		WF1	4.6349	0.0530268	0.963912
5.22809	DF2		WF2	4.56939	-0.0124791	1.00869
5.30245	DF2		WF3	4.73088	0.149013	0.901867
5.05931	DF3		WM1	4.49088	-0.0909932	1.0651
5.08192	DF3		WM2	4.47512	-0.106748	1.0768
5.04952	DF3		WM3	4.59005	0.00818062	0.994346
4.58216	WF1
4.675	WF1
4.64753	WF1
4.5896	WF2
4.54151	WF2
4.57707	WF2
4.74551	WF3
4.72769	WF3
4.71945	WF3
4.70684	GM1
4.64295	GM1
4.80087	GM1
4.56808	GM2
4.50938	GM2
4.56935	GM2
4.31591	GM3
4.3108	GM3
4.17467	GM3
5.38681	DM1
5.35661	DM1
5.33289	DM1
5.05735	DM2
4.9874	DM2
5.08539	DM2
5.26992	DM3
5.21745	DM3
5.27469	DM3
4.45908	WM1
4.50672	WM1
4.50683	WM1
4.46433	WM2
4.4896	WM2
4.47143	WM2
4.57528	WM3
4.56402	WM3
4.63086	WM3

## Sheet: Hip Kcnq2 CT QC
Animal	Technical replicate number	Target	Cycle threshold (CT)		Animal	Genotype	Average Kcnq2 CT	Average Gapdh CT	SD Kcnq2 CT	SD Gapdh CT		Genotype	Average Kcnq2 CT	SEM Kcnq2 CT
WF1	1	Gapdh	16.9556		WF1	WT	21.553	16.9181	0.0144273	0.0334101		WT	21.8617	0.132691
WF1	2	Kcnq2	21.5377		WF2	WT	22.2631	17.6937	0.0359319	0.0402258		E254fs/+	22.651	0.0958268
WF1	3	Gapdh	16.8914		WF3	WT	22.1862	17.4553	0.0208216	0.0210872		G256W/+	21.6005	0.128282
WF1	1	Kcnq2	21.5664		WM1	WT	21.4955	17.0046	0.0144755	0.0265561
WF1	2	Gapdh	16.9073		WM2	WT	21.7114	17.2363	0.0830355	0.0857917		Genotype	Average Gapdh CT	SEM Gapdh CT
WF1	3	Kcnq2	21.5549		WM3	WT	21.9611	17.371	0.127073	0.0921942		WT	17.2798	0.118155
WF2	1	Gapdh	17.7074		DF1	E254fs/+	22.8236	17.2232	0.0352404	0.0645173		E254fs/+	17.3861	0.0543849
WF2	2	Kcnq2	22.297		DF2	E254fs/+	22.679	17.41	0.0344846	0.0397368		G256W/+	17.0357	0.108224
WF2	3	Gapdh	17.7252		DF3	E254fs/+	22.3497	17.2861	0.00625587	0.016475
WF2	1	Kcnq2	22.2667		DM1	E254fs/+	22.8583	17.4995	0.0209122	0.0239452
WF2	2	Gapdh	17.6484		DM2	E254fs/+	22.368	17.3246	0.0660494	0.0340456
WF2	3	Kcnq2	22.2254		DM3	E254fs/+	22.8272	17.5731	0.0702538	0.057989
WF3	1	Gapdh	17.4546		GF1	G256W/+	21.0628	16.7053	0.0717594	0.0311858
WF3	2	Kcnq2	22.2001		GF2	G256W/+	21.4251	16.8194	0.0118514	0.0207182
WF3	3	Gapdh	17.4345		GF3	G256W/+	21.8423	16.949	0.0412028	0.0739477
WF3	1	Kcnq2	22.1622		GM1	G256W/+	21.9219	17.205	0.0299317	0.063797
WF3	2	Gapdh	17.4767		GM2	G256W/+	21.6557	17.1068	0.0398774	0.0369664
WF3	3	Kcnq2	22.1961		GM3	G256W/+	21.6955	17.4284	0.0212091	0.0780064
WM1	1	Gapdh	17.031
WM1	2	Kcnq2	21.4901
WM1	3	Gapdh	16.9779
WM1	1	Kcnq2	21.4846
WM1	2	Gapdh	17.0051
WM1	3	Kcnq2	21.5119
WM2	1	Gapdh	17.1902
WM2	2	Kcnq2	21.6545
WM2	3	Gapdh	17.1833
WM2	1	Kcnq2	21.6729
WM2	2	Gapdh	17.3352
WM2	3	Kcnq2	21.8067
WM3	1	Gapdh	17.3082
WM3	2	Kcnq2	21.8835
WM3	3	Gapdh	17.328
WM3	1	Kcnq2	21.8921
WM3	2	Gapdh	17.4769
WM3	3	Kcnq2	22.1077
DF1	1	Gapdh	17.2593
DF1	2	Kcnq2	22.86
DF1	3	Gapdh	17.2617
DF1	1	Kcnq2	22.8212
DF1	2	Gapdh	17.1488
DF1	3	Kcnq2	22.7896
DF2	1	Gapdh	17.4412
DF2	2	Kcnq2	22.7177
DF2	3	Gapdh	17.4235
DF2	1	Kcnq2	22.6516
DF2	2	Gapdh	17.3652
DF2	3	Kcnq2	22.6677
DF3	1	Gapdh	17.2832
DF3	2	Kcnq2	22.3425
DF3	3	Gapdh	17.2713
DF3	1	Kcnq2	22.3532
DF3	2	Gapdh	17.3038
DF3	3	Kcnq2	22.3534
DM1	1	Gapdh	17.4739
DM1	2	Kcnq2	22.8607
DM1	3	Gapdh	17.5213
DM1	1	Kcnq2	22.8779
DM1	2	Gapdh	17.5034
DM1	3	Kcnq2	22.8363
DM2	1	Gapdh	17.2889
DM2	2	Kcnq2	22.3463
DM2	3	Gapdh	17.3281
DM2	1	Kcnq2	22.3155
DM2	2	Gapdh	17.3568
DM2	3	Kcnq2	22.4421
DM3	1	Gapdh	17.518
DM3	2	Kcnq2	22.7879
DM3	3	Gapdh	17.5679
DM3	1	Kcnq2	22.7853
DM3	2	Gapdh	17.6336
DM3	3	Kcnq2	22.9083
GF1	1	Gapdh	16.6775
GF1	2	Kcnq2	20.987
GF1	3	Gapdh	16.6994
GF1	1	Kcnq2	21.0716
GF1	2	Gapdh	16.739
GF1	3	Kcnq2	21.1297
GF2	1	Gapdh	16.8431
GF2	2	Kcnq2	21.4143
GF2	3	Gapdh	16.8047
GF2	1	Kcnq2	21.4378
GF2	2	Gapdh	16.8105
GF2	3	Kcnq2	21.4233
GF3	1	Gapdh	16.9137
GF3	2	Kcnq2	21.8586
GF3	3	Gapdh	16.8993
GF3	1	Kcnq2	21.7954
GF3	2	Gapdh	17.034
GF3	3	Kcnq2	21.8728
GM1	1	Gapdh	17.2384
GM1	2	Kcnq2	21.9452
GM1	3	Gapdh	17.2452
GM1	1	Kcnq2	21.8881
GM1	2	Gapdh	17.1314
GM1	3	Kcnq2	21.9323
GM2	1	Gapdh	17.1337
GM2	2	Kcnq2	21.7018
GM2	3	Gapdh	17.1221
GM2	1	Kcnq2	21.6315
GM2	2	Gapdh	17.0647
GM2	3	Kcnq2	21.634
GM3	1	Gapdh	17.3623
GM3	2	Kcnq2	21.6782
GM3	3	Gapdh	17.4084
GM3	1	Kcnq2	21.7192
GM3	2	Gapdh	17.5145
GM3	3	Kcnq2	21.6891

## Sheet: Cortex Kcnq2 Quant
Mouse ID	Strain	Tube Label	DOB	DOD	Sex	Genotype	Fold Change
T102.1-1	G256W	GF1	2020-03-10	2020-06-24	F	Het	0.924066		Genotype	Average Fold Change	SEM
T102.1-3	G256W	GF2	2020-03-10	2020-06-24	F	Het	0.914756		WT	1.00134	0.0231009
T102.1-6	G256W	GF3	2020-03-10	2020-06-24	F	Het	0.865786		G256W	0.993718	0.0439157
190.2-3	E254fs	DF1	2020-03-25	2020-07-16	F	Het	0.578405		E254fs	0.640196	0.0462687
190.2-5	E254fs	DF2	2020-03-25	2020-07-16	F	Het	0.716253
190.2-7	E254fs	DF3	2020-03-25	2020-07-16	F	Het	0.730184
T104.1-3	G256W	GM1	2020-03-16	2020-07-20	M	Het	1.11243
T102.1-2	G256W	GM2	2020-03-10	2020-06-24	M	Het	1.02873
T102.1-4	G256W	GM3	2020-03-10	2020-06-24	M	Het	1.11654
211.1-2	E254fs	DM1	2020-03-02	2020-07-08	M	Het	0.576208
211.1-3	E254fs	DM2	2020-03-02	2020-07-08	M	Het	0.764318
211.2-3	E254fs	DM3	2020-04-16	2020-07-16	M	Het	0.47581
T104.2-3	G256W	WF1	2020-04-06	2020-06-24	F	WT	0.98069
A102.2-4	G256W	WF2	2020-03-08	2020-07-07	F	WT	1.02936
187.4-3	G256W	WF3	2020-03-08	2020-07-14	F	WT	0.949888
T103.1-3	G256W	WM1	2020-03-14	2020-07-20	M	WT	0.930267
T102.1-5	G256W	WM2	2020-03-10	2020-06-24	M	WT	1.07427
T104.1-1	G256W	WM3	2020-03-16	2020-07-08	M	WT	1.04354

## Sheet: One Sample ttest CTX Q2
E254Vfs Kcnq2 fold change		Sample size	6
0.578405		Sample mean	0.640196
0.716253		Sample standard deviation	0.113335
0.730184		Sample SEM	0.0188891
0.576208		Degrees of freedom	5
0.764318		Hypothesized mean	0.5
0.47581		T statistic t	7.42206
		P-value	0.000699385

## Sheet: DeltaDeltaCT Cortex Kcnq2
DeltaCT	RNA ID		RNA ID	DeltaCt	DeltaDeltaCT	DeltaDeltaCT By Sex	Fold Change
4.63485	GF1		GF1	4.70574	0.113932	0.093747	0.924066
4.69381	GF1		GF2	4.72035	0.128541	0.108356	0.914756
4.78855	GF1		GF3	4.79972	0.207917	0.187732	0.865786
4.62996	GF2		DF1	5.38165	0.789848	0.769663	0.578405
4.75368	GF2		DF2	5.07326	0.481459	0.461273	0.716253
4.7774	GF2		DF3	5.04547	0.453668	0.433483	0.730184
4.84426	GF3		GM1	4.43809	-0.153717	-0.133531	1.11243
4.74542	GF3		GM2	4.55095	-0.04086	-0.0206748	1.02873
4.80949	GF3		GM3	4.43277	-0.15904	-0.138855	1.11654
5.36486	DF1		DM1	5.38714	0.795338	0.815523	0.576208
5.3643	DF1		DM2	4.97956	0.387756	0.407941	0.764318
5.4158	DF1		DM3	5.66335	1.07154	1.09173	0.47581
4.97007	DF2		WF1	4.61994	0.0281314	0.00794623	0.98069
5.01591	DF2		WF2	4.55006	-0.0417462	-0.0619314	1.02936
5.23381	DF2		WF3	4.66598	0.0741703	0.0539852	0.949888
5.05061	DF3		WM1	4.69609	0.104284	0.124469	0.930267
5.04087	DF3		WM2	4.48845	-0.103356	-0.0831704	1.07427
5.04494	DF3		WM3	4.53032	-0.0614835	-0.0412983	1.04354
4.37852	GM1
4.4565	GM1
4.47925	GM1
4.55027	GM2
4.585	GM2
4.51757	GM2
4.26467	GM3
4.56344	GM3
4.47018	GM3
5.52609	DM1
5.27445	DM1
5.36089	DM1
4.96526	DM2
4.92801	DM2
5.04541	DM2
5.67753	DM3
5.62755	DM3
5.68495	DM3
4.61803	WF1
4.61841	WF1
4.62337	WF1
4.60173	WF2
4.4687	WF2
4.57975	WF2
4.73867	WF3
4.46553	WF3
4.79373	WF3
4.70532	WM1
4.67388	WM1
4.70906	WM1
4.47843	WM2
4.42758	WM2
4.55934	WM2
4.50032	WM3
4.65561	WM3
4.43504	WM3

## Sheet: Cortex Kcnq2 CT QC
Animal	Technical replicate number	Target	Cycle threshold (CT)		Animal	Genotype	Average Kcnq2 CT	Average Gapdh CT	SD Kcnq2 CT	SD Gapdh CT		Genotype	Average Kcnq2 CT	SEM Kcnq2 CT
WF1	1	Gapdh	17.184		WF1	WT	21.6366	17.0166	0.349258	0.34768		WT	21.8937	0.129394
WF1	2	Kcnq2	21.8021		WF2	WT	21.53	16.98	0.281247	0.309942		E254fs/+	22.3196	0.147336
WF1	3	Gapdh	16.6169		WF3	WT	22.2061	17.51	0.198085	0.17952		G256W/+	21.6818	0.0418143
WF1	1	Kcnq2	21.2353		WM1	WT	22.3073	17.2618	0.3287	0.328567
WF1	2	Gapdh	17.249		WM2	WT	21.963	17.4746	0.0658399	0.131733		Genotype	Average Gapdh CT	SEM Gapdh CT
WF1	3	Kcnq2	21.8723		WM3	WT	21.7192	17.1888	0.0406313	0.0767015		WT	17.2386	0.0910172
WF2	1	Gapdh	17.1094		DF1	E254fs/+	22.2427	16.861	0.244298	0.224657		E254fs/+	17.1278	0.0588707
WF2	2	Kcnq2	21.7112		DF2	E254fs/+	22.3147	17.2414	0.0986129	0.0942241		G256W/+	17.0739	0.0596431
WF2	3	Gapdh	17.2042		DF3	E254fs/+	21.7649	17.0989	0.964706	0.895646
WF2	1	Kcnq2	21.6728		DM1	E254fs/+	22.5083	17.1212	0.19697	0.32051
WF2	2	Gapdh	16.6263		DM2	E254fs/+	22.2262	17.2467	0.227374	0.173851
WF2	3	Kcnq2	21.206		DM3	E254fs/+	22.8611	17.1978	0.323895	0.344564
WF3	1	Gapdh	17.6471		GF1	G256W/+	21.7494	17.0436	0.756232	0.680236
WF3	2	Kcnq2	22.3525		GF2	G256W/+	21.7378	17.0175	0.540778	0.466199
WF3	3	Gapdh	17.3068		GF3	G256W/+	21.6371	16.8374	0.185902	0.219124
WF3	1	Kcnq2	21.9807		GM1	G256W/+	21.5593	17.1212	0.190892	0.143691
WF3	2	Gapdh	17.5761		GM2	G256W/+	21.8194	17.2685	0.387602	0.413845
WF3	3	Kcnq2	22.2851		GM3	G256W/+	21.5879	17.1551	0.547047	0.485471
WM1	1	Gapdh	17.1107
WM1	2	Kcnq2	22.1613
WM1	3	Gapdh	17.0359
WM1	1	Kcnq2	22.0768
WM1	2	Gapdh	17.6387
WM1	3	Kcnq2	22.6837
WM2	1	Gapdh	17.4806
WM2	2	Kcnq2	21.959
WM2	3	Gapdh	17.6032
WM2	1	Kcnq2	22.0308
WM2	2	Gapdh	17.3399
WM2	3	Kcnq2	21.8993
WM3	1	Gapdh	17.1925
WM3	2	Kcnq2	21.6929
WM3	3	Gapdh	17.1103
WM3	1	Kcnq2	21.766
WM3	2	Gapdh	17.2636
WM3	3	Kcnq2	21.6987
DF1	1	Gapdh	16.9569
DF1	2	Kcnq2	22.3218
DF1	3	Gapdh	16.6043
DF1	1	Kcnq2	21.9686
DF1	2	Gapdh	17.0218
DF1	3	Kcnq2	22.4376
DF2	1	Gapdh	17.2321
DF2	2	Kcnq2	22.2021
DF2	3	Gapdh	17.3399
DF2	1	Kcnq2	22.3559
DF2	2	Gapdh	17.1522
DF2	3	Kcnq2	22.386
DF3	1	Gapdh	16.2956
DF3	2	Kcnq2	21.0343
DF3	3	Gapdh	16.9363
DF3	1	Kcnq2	21.4019
DF3	2	Gapdh	18.0647
DF3	3	Kcnq2	22.8584
DM1	1	Gapdh	16.7548
DM1	2	Kcnq2	22.2809
DM1	3	Gapdh	17.3497
DM1	1	Kcnq2	22.6241
DM1	2	Gapdh	17.259
DM1	3	Kcnq2	22.6199
DM2	1	Gapdh	17.1099
DM2	2	Kcnq2	22.0752
DM2	3	Gapdh	17.1878
DM2	1	Kcnq2	22.1158
DM2	2	Gapdh	17.4423
DM2	3	Kcnq2	22.4877
DM3	1	Gapdh	16.8245
DM3	2	Kcnq2	22.502
DM3	3	Gapdh	17.5037
DM3	1	Kcnq2	23.1312
DM3	2	Gapdh	17.2651
DM3	3	Kcnq2	22.95
GF1	1	Gapdh	16.5359
GF1	2	Kcnq2	21.1707
GF1	3	Gapdh	16.7785
GF1	1	Kcnq2	21.4723
GF1	2	Gapdh	17.8165
GF1	3	Kcnq2	22.6051
GF2	1	Gapdh	16.5503
GF2	2	Kcnq2	21.1803
GF2	3	Gapdh	17.0194
GF2	1	Kcnq2	21.7731
GF2	2	Gapdh	17.4827
GF2	3	Kcnq2	22.2601
GF3	1	Gapdh	16.5849
GF3	2	Kcnq2	21.4292
GF3	3	Gapdh	16.9496
GF3	1	Kcnq2	21.6951
GF3	2	Gapdh	16.9777
GF3	3	Kcnq2	21.7872
GM1	1	Gapdh	17.0009
GM1	2	Kcnq2	21.3794
GM1	3	Gapdh	17.0824
GM1	1	Kcnq2	21.5389
GM1	2	Gapdh	17.2803
GM1	3	Kcnq2	21.7596
GM2	1	Gapdh	16.9848
GM2	2	Kcnq2	21.5351
GM2	3	Gapdh	17.0772
GM2	1	Kcnq2	21.6622
GM2	2	Gapdh	17.7433
GM2	3	Kcnq2	22.2609
GM3	1	Gapdh	16.8459
GM3	2	Kcnq2	21.1106
GM3	3	Gapdh	16.9049
GM3	1	Kcnq2	21.4683
GM3	2	Gapdh	17.7147
GM3	3	Kcnq2	22.1849

## Sheet: Hippocampus Kcnq3 Quant
Mouse ID	Strain	Tube Label	DOB	DOD	Sex	Age (Days)	Genotype	Fold Change
T102.1-1	G256W	GF1	2020-03-10	2020-06-24	F	106	Het	1.25576		Genotype	Average Fold Change	SEM
T102.1-3	G256W	GF2	2020-03-10	2020-06-24	F	106	Het	1.17765		WT	1.0009	0.0189972
T102.1-6	G256W	GF3	2020-03-10	2020-06-24	F	106	Het	1.05982		G256W	1.16223	0.0349765
190.2-3	E254fs	DF1	2020-03-25	2020-07-16	F	113	Het	0.958791		E254fs	1.04929	0.0273761
190.2-5	E254fs	DF2	2020-03-25	2020-07-16	F	113	Het	1.14379
190.2-7	E254fs	DF3	2020-03-25	2020-07-16	F	113	Het	1.01064
T104.1-3	G256W	GM1	2020-03-16	2020-07-20	M	126	Het	1.08023
T102.1-2	G256W	GM2	2020-03-10	2020-06-24	M	106	Het	1.13809
T102.1-4	G256W	GM3	2020-03-10	2020-06-24	M	106	Het	1.26183
211.1-2	E254fs	DM1	2020-03-02	2020-07-08	M	128	Het	1.02505
211.1-3	E254fs	DM2	2020-03-02	2020-07-08	M	128	Het	1.05093
211.2-3	E254fs	DM3	2020-04-16	2020-07-16	M	91	Het	1.10655
T104.2-3	G256W	WF1	2020-04-06	2020-06-24	F	79	WT	0.940207
A102.2-4	G256W	WF2	2020-03-08	2020-07-07	F	121	WT	0.996102
187.4-3	G256W	WF3	2020-03-08	2020-07-14	F	128	WT	1.06675
T103.1-3	G256W	WM1	2020-03-14	2020-07-20	M	128	WT	1.03916
T102.1-5	G256W	WM2	2020-03-10	2020-06-24	M	106	WT	0.998531
T104.1-1	G256W	WM3	2020-03-16	2020-07-08	M	114	WT	0.964643

[truncated: 5 more sheets: DeltaDeltaCT Hip Kcnq3, Hip Kcnq3 CT QC, Cortex Kcnq3 Quant, DeltaDeltaCT Cortex Kcnq3, CTX Kcnq3 CT QC]
