# Supplementary material for: Plural molecular and cellular mechanisms of pore domain KCNQ2 encephalopathy
Source: eLife. 2025 Jan 6;13:RP91204. doi: 10.7554/eLife.91204 (PMC11703504; doi:10.7554/eLife.91204)
Supplement: Figure 7—source data 3. [file elife-91204-fig7-data3.xlsx]

## Sheet: Metadata
Mouse ID	Strain	Sex	RNA Tube ID	Age (Days)	Genotype	Brain Weight (g)
A120.1-2	G256W	F	W1	21	WT	0.44
A120.1-4	G256W	F	W2	21	WT	0.42
A120.3-11	G256W	F	W3	21	WT	0.43
A120.3-2	G256W	M	W4	21	WT	0.41
A120.3-4	G256W	M	W5	21	WT	0.42
A120.3-5	G256W	M	W6	21	WT	0.42
D105.2-3	E254fs	F	D1	21	Het	0.41
D100.5-2	E254fs	F	D2	21	Het	0.42
D105.4-5	E254fs	F	D3	22	Het	0.43
D100.5-1	E254fs	M	D4	21	Het	0.44
D105.4-4	E254fs	M	D5	22	Het	0.41
D105.6-1	E254fs	M	D6	20	Het	0.36
T111.4-6	G256W	F	G1	21	Het	0.44
T111.6-4	G256W	F	G2	21	Het	0.42
T111.6-5	G256W	F	G3	21	Het	0.43
T111.4-4	G256W	M	G5	21	Het	0.44
T111.4-5	G256W	M	G6	21	Het	0.44

## Sheet: Hip Kcnq2
Mouse ID	Strain	Sex	RNA Tube ID	Age (Days)	Genotype	Fold Change
A120.1-2	G256W	F	W1	21	WT	0.803516		Genotype	Average Fold Change	SEM
A120.1-4	G256W	F	W2	21	WT	1.02645		WT	1.00495	0.046544
A120.3-11	G256W	F	W3	21	WT	1.10765		E254fs	0.504064	0.0272827
A120.3-2	G256W	M	W4	21	WT	1.01783		G256W/+	0.444593	0.0293638
A120.3-4	G256W	M	W5	21	WT	1.02412
A120.3-5	G256W	M	W6	21	WT	1.05012
D105.2-3	E254fs	F	D1	21	Het	0.498334
D100.5-2	E254fs	F	D2	21	Het	0.527862
D105.4-5	E254fs	F	D3	22	Het	0.415168
D100.5-1	E254fs	M	D4	21	Het	0.456122
D105.4-4	E254fs	M	D5	22	Het	0.516132
D105.6-1	E254fs	M	D6	20	Het	0.610763
T111.4-6	G256W	F	G1	21	Het	0.495621
T111.6-4	G256W	F	G2	21	Het	0.420434
T111.6-5	G256W	F	G3	21	Het	0.469285
T111.4-4	G256W	M	G5	21	Het	0.340972
T111.4-5	G256W	M	G6	21	Het	0.496652

## Sheet: One sample ttest hip Q2
E254fs Kcnq2 fold change		Sample size	6
0.498334		Sample mean	0.504064
0.527862		Sample standard deviation	0.0668288
0.415168		Sample SEM	0.0111381
0.456122		Degrees of freedom	5
0.516132		Hypothesized mean	0.5
0.610763		T statistic t	0.364844
		P-value	0.730152

## Sheet: Raw hip Kcnq2
Sample Name	Sex	Delta Ct		Sample Name	Sex	DeltaCt	Stdev Tech Reps	DeltaDeltaCT	Fold Change
W1	F	4.8823		W1	F	4.89701	0.0383839	0.315601	0.803516
W1	F	4.86816		W2	F	4.54375	0.0259359	-0.0376598	1.02645
W1	F	4.94057		W3	F	4.43391	0.0354704	-0.1475	1.10765
W2	F	4.51729		W4	M	4.55591	0.0209139	-0.0254998	1.01783
W2	F	4.54483		W5	M	4.54703	0.0360508	-0.0343842	1.02412
W2	F	4.56913		W6	M	4.51085	0.0230698	-0.0705577	1.05012
W3	F	4.40641		D1	F	5.58622	0.00908708	1.00481	0.498334
W3	F	4.42137		D2	F	5.50318	0.0974871	0.921766	0.527862
W3	F	4.47395		D3	F	5.84964	0.031278	1.26823	0.415168
W4	M	4.56522		D4	M	5.71392	0.0296518	1.13251	0.456122
W4	M	4.53196		D5	M	5.5356	0.0187471	0.954188	0.516132
W4	M	4.57055		D6	M	5.29272	0.0612038	0.711315	0.610763
W5	M	4.51119		G1	F	5.5941	0.0296746	1.01269	0.495621
W5	M	4.54659		G2	F	5.83146	0.0216153	1.25005	0.420434
W5	M	4.58329		G3	F	5.67287	0.0190672	1.09146	0.469285
W6	M	4.48827		G5	M	6.13368	0.0584987	1.55227	0.340972
W6	M	4.53438		G6	M	5.5911	0.0443305	1.00969	0.496652
W6	M	4.5099
D1	M	5.58135
D1	F	5.59671
D1	F	5.58061
D2	F	5.56999
D2	F	5.39131
D2	F	5.54823
D3	F	5.81643
D3	F	5.87853
D3	F	5.85397
D4	F	5.68128
D4	M	5.7392
D4	M	5.72127
D5	M	5.55691
D5	M	5.52164
D5	M	5.52824
D6	M	5.22385
D6	M	5.31343
D6	M	5.34089
G1	M	5.56244
G1	M	5.62127
G1	F	5.5986
G2	F	5.85271
G2	F	5.8095
G2	F	5.83217
G3	F	5.65112
G3	F	5.68668
G3	F	5.68083
G5	M	6.15158
G5	M	6.06833
G5	M	6.18114
G6	M	5.54144
G6	M	5.62668
G6	M	5.60519

## Sheet: Hip Kcnq2 CT QC
Animal	Technical replicate number	Target	Cycle threshold (CT)		Animal	Genotype	Average Kcnq2 CT	Average Gapdh CT	SD Kcnq2 CT	SD Gapdh CT		Genotype	Average Kcnq2 CT	SEM Kcnq2 CT
W1	1	Gapdh	19.9945		W1	WT	24.9044	20.0074	0.063871	0.0255819		WT	24.7896	0.0649907
W1	2	Kcnq2	24.8768		W2	WT	24.7601	20.2163	0.0929623	0.068345		E254fs/+	25.7412	0.0912798
W1	3	Gapdh	19.9908		W3	WT	24.5121	20.0782	0.0785917	0.0896584		G256W/+	25.8361	0.0903959
W1	1	Kcnq2	24.8589		W4	WT	24.9243	20.3684	0.0646666	0.0455222
W1	2	Gapdh	20.0368		W5	WT	24.7296	20.1825	0.003354	0.0372729		Genotype	Average Gapdh CT	SEM Gapdh CT
W1	3	Kcnq2	24.9774		W6	WT	24.9075	20.3966	0.0754666	0.0958313		WT	20.2082	0.0630163
W2	1	Gapdh	20.1379		D1	E254fs/+	25.7261	20.1399	0.179378	0.180658		E254fs/+	20.161	0.0807361
W2	2	Kcnq2	24.6552		D2	E254fs/+	25.8488	20.3456	0.190101	0.141536		G256W/+	20.0715	0.0493143
W2	3	Gapdh	20.2479		D3	E254fs/+	26.0768	20.2271	0.109277	0.0810243
W2	1	Kcnq2	24.7927		D4	E254fs/+	25.4966	19.7827	0.0811174	0.0523216
W2	2	Gapdh	20.2632		D5	E254fs/+	25.8059	20.2703	0.147244	0.158498
W2	3	Kcnq2	24.8323		D6	E254fs/+	25.4932	20.2004	0.165538	0.147439
W3	1	Gapdh	20.1791		G1	G256W/+	25.7514	20.1573	0.15783	0.138848
W3	2	Kcnq2	24.5855		G2	G256W/+	25.7778	19.9463	0.164474	0.155806
W3	3	Gapdh	20.0078		G3	G256W/+	25.6284	19.9555	0.196288	0.197568
W3	1	Kcnq2	24.4292		G5	G256W/+	26.2126	20.0789	0.181513	0.126568
W3	2	Gapdh	20.0475		G6	G256W/+	25.8103	20.2192	0.263182	0.230345
W3	3	Kcnq2	24.5215
W4	1	Gapdh	20.4094
W4	2	Kcnq2	24.9746
W4	3	Gapdh	20.3194
W4	1	Kcnq2	24.8514
W4	2	Gapdh	20.3764
W4	3	Kcnq2	24.9469
W5	1	Gapdh	20.2176
W5	2	Kcnq2	24.7288
W5	3	Gapdh	20.1866
W5	1	Kcnq2	24.7332
W5	2	Gapdh	20.1434
W5	3	Kcnq2	24.7267
W6	1	Gapdh	20.5064
W6	2	Kcnq2	24.9946
W6	3	Gapdh	20.3293
W6	1	Kcnq2	24.8637
W6	2	Gapdh	20.3542
W6	3	Kcnq2	24.8641
D1	1	Gapdh	20.3382
D1	2	Kcnq2	25.9195
D1	3	Gapdh	20.097
D1	1	Kcnq2	25.6937
D1	2	Gapdh	19.9846
D1	3	Kcnq2	25.5652
D2	1	Gapdh	20.4966
D2	2	Kcnq2	26.0666
D2	3	Gapdh	20.3245
D2	1	Kcnq2	25.7158
D2	2	Gapdh	20.2159
D2	3	Kcnq2	25.7641
D3	1	Gapdh	20.1707
D3	2	Kcnq2	25.9871
D3	3	Gapdh	20.32
D3	1	Kcnq2	26.1985
D3	2	Gapdh	20.1907
D3	3	Kcnq2	26.0447
D4	1	Gapdh	19.7223
D4	2	Kcnq2	25.4035
D4	3	Gapdh	19.8132
D4	1	Kcnq2	25.5524
D4	2	Gapdh	19.8126
D4	3	Kcnq2	25.5338
D5	1	Gapdh	20.1802
D5	2	Kcnq2	25.7371
D5	3	Gapdh	20.4533
D5	1	Kcnq2	25.975
D5	2	Gapdh	20.1775
D5	3	Kcnq2	25.7057
D6	1	Gapdh	20.1448
D6	2	Kcnq2	25.3687
D6	3	Gapdh	20.3676
D6	1	Kcnq2	25.681
D6	2	Gapdh	20.0889
D6	3	Kcnq2	25.4298
G1	1	Gapdh	20.0219
G1	2	Kcnq2	25.5843
G1	3	Gapdh	20.1508
G1	1	Kcnq2	25.7721
G1	2	Gapdh	20.2993
G1	3	Kcnq2	25.8979
G2	1	Gapdh	20.0875
G2	2	Kcnq2	25.9402
G2	3	Gapdh	19.9723
G2	1	Kcnq2	25.7818
G2	2	Gapdh	19.7792
G2	3	Kcnq2	25.6113
G3	1	Gapdh	20.0162
G3	2	Kcnq2	25.6673
G3	3	Gapdh	20.1156
G3	1	Kcnq2	25.8023
G3	2	Gapdh	19.7347
G3	3	Kcnq2	25.4155
G5	1	Gapdh	20.0564
G5	2	Kcnq2	26.208
G5	3	Gapdh	19.9651
G5	1	Kcnq2	26.0334
G5	2	Gapdh	20.2152
G5	3	Kcnq2	26.3963
G6	1	Gapdh	20.0855
G6	2	Kcnq2	25.6269
G6	3	Gapdh	20.4852
G6	1	Kcnq2	26.1119
G6	2	Gapdh	20.087
G6	3	Kcnq2	25.6922

## Sheet: CTX Kcnq2
Mouse ID	Strain	Sex	RNA Tube ID	Age (Days)	Genotype	Fold Change	Notes
A120.1-2	G256W	F	W1	21	WT	1.06976		Genotype	Average Fold Change	SEM
A120.1-4	G256W	F	W2	21	WT	0.985426		WT	1.00467	0.043856
A120.3-11	G256W	F	W3	21	WT	1.17935		E254fs	0.525973	0.018814
A120.3-2	G256W	M	W4	21	WT	0.866016		G256W/+	0.478957	0.0240358
A120.3-4	G256W	M	W5	21	WT	0.961875
A120.3-5	G256W	M	W6	21	WT	0.965612
D105.2-3	E254fs	F	D1	21	Het	0.529697
D100.5-2	E254fs	F	D2	21	Het	0.455597
D105.4-5	E254fs	F	D3	22	Het	0.561779
D100.5-1	E254fs	M	D4	21	Het	0.501062
D105.4-4	E254fs	M	D5	22	Het	0.539266
D105.6-1	E254fs	M	D6	20	Het	0.568437
T111.4-6	G256W	F	G1	21	Het	0.500321
T111.6-4	G256W	F	G2	21	Het	0.418224
T111.6-5	G256W	F	G3	21	Het	0.46692
T111.4-4	G256W	M	G5	21	Het	0.518258
T111.4-5	G256W	M	G6	21	Het	0.530365

## Sheet: One sample ttest CTX Q2
E254fs Kcnq2 fold change		Sample size	6
0.529697		Sample mean	0.525973
0.455597		Sample standard deviation	0.0420693
0.561779		Sample SEM	0.00701156
0.501062		Degrees of freedom	5
0.539266		Hypothesized mean	0.5
0.568437		T statistic t	3.70431
		P-value	0.0139368

## Sheet: CTX Kcnq2 raw data
Sample Name	Sex	Delta Ct		Sample Name	Sex	DeltaCt	Stdev Tech Reps	DeltaDeltaCT	Fold Change
W1	F	4.73252		W1	F	4.75216	0.49352	-0.0972911	1.06976
W1	F	4.70569		W2	F	4.87063	0.0177974	0.0211807	0.985426
W1	F	4.81827		W3	F	4.61147	0.0531646	-0.237986	1.17935
W2	F	4.87042		W4	M	5.05699	0.0364911	0.207534	0.866016
W2	F	4.88853		W5	M	4.90553	0.0461617	0.0560788	0.961875
W2	F	4.85294		W6	M	4.89994	0.0187117	0.0504839	0.965612
W3	F	4.55176		D1	F	5.76621	0.0252184	0.916761	0.529697
W3	F	4.65367		D2	F	5.98362	0.00469197	1.13417	0.455597
W3	F	4.62897		D3	F	5.68138	0.0289385	0.831926	0.561779
W4	M	5.09838		D4	M	5.84639	0.011299	0.996938	0.501062
W4	M	5.04309		D5	M	5.74038	0.0101258	0.89093	0.539266
W4	M	5.02948		D6	M	5.66438	0.0350175	0.814928	0.568437
W5	M	4.85866		G1	F	5.84853	0.0426057	0.999075	0.500321
W5	M	4.90699		G2	F	6.1071	0.0686273	1.25765	0.418224
W5	M	4.95095		G3	F	5.9482	0.0235997	1.09875	0.46692
W6	M	4.89402		G5	M	5.79771	0.0149543	0.948258	0.518258
W6	M	4.8849		G6	M	5.76439	0.0659102	0.914941	0.530365
W6	M	4.92089
D1	M	5.76539
D1	F	5.74141
D1	F	5.79183
D2	F	5.98624
D2	F	5.9782
D2	F	5.98642
D3	F	5.64969
D3	F	5.68804
D3	F	5.7064
D4	F	5.83629
D4	M	5.84428
D4	M	5.85859
D5	M	5.75185
D5	M	5.73664
D5	M	5.73266
D6	M	5.65213
D6	M	5.63713
D6	M	5.70388
G1	M	5.87886
G1	M	5.79982
G1	F	5.8669
G2	F	6.02787
G2	F	6.14798
G2	F	6.14546
G3	F	5.92464
G3	F	5.97184
G3	F	5.94813
G5	M	5.79389
G5	M	5.78504
G5	M	5.8142
G6	M	5.70695
G6	M	5.74988
G6	M	5.83635

## Sheet: Cortex Kcnq2 CT QC
Animal	Technical replicate number	Target	Cycle threshold (CT)		Animal	Genotype	Average Kcnq2 CT	Average Gapdh CT	SD Kcnq2 CT	SD Gapdh CT		Genotype	Average Kcnq2 CT	SEM Kcnq2 CT
W1	1	Gapdh	20.4361		W1	WT	25.2587	20.5065	0.107433	0.06346		WT	25.0124	0.201109
W1	2	Kcnq2	25.1686		W2	WT	24.3139	19.4433	0.167863	0.181754		E254fs/+	26.254	0.245044
W1	3	Gapdh	20.5241		W3	WT	25.6743	21.0628	0.136263	0.0834514		G256W/+	26.3865	0.148701
W1	1	Kcnq2	25.2298		W4	WT	25.2749	20.2179	0.0439564	0.0169355
W1	2	Gapdh	20.5593		W5	WT	24.624	19.7184	0.0324285	0.0653432		Genotype	Average Gapdh CT	SEM Gapdh CT
W1	3	Kcnq2	25.3776		W6	WT	24.9286	20.0287	0.0332991	0.0426338		WT	20.1629	0.235534
W2	1	Gapdh	19.319		D1	E254fs/+	26.0575	20.2913	0.0158854	0.0409806		E254fs/+	20.4736	0.231835
W2	2	Kcnq2	24.1894		D2	E254fs/+	26.4563	20.4727	0.0369803	0.0366842		G256W/+	20.4933	0.159656
W2	3	Gapdh	19.359		D3	E254fs/+	26.7693	21.088	0.0228183	0.0263112
W2	1	Kcnq2	24.2476		D4	E254fs/+	26.5409	20.6945	0.0389325	0.0439234
W2	2	Gapdh	19.6519		D5	E254fs/+	26.5737	20.8333	0.0592512	0.0602669
W2	3	Kcnq2	24.5048		D6	E254fs/+	25.1263	19.4619	0.0290732	0.0216096
W3	1	Gapdh	20.9668		G1	G256W/+	26.8161	20.9676	0.0284905	0.0259785
W3	2	Kcnq2	25.5186		G2	G256W/+	26.5564	20.4493	0.0504664	0.0702597
W3	3	Gapdh	21.1181		G3	G256W/+	25.908	19.9597	0.00826208	0.0266817
W3	1	Kcnq2	25.7717		G5	G256W/+	26.1248	20.3271	0.159912	0.147641
W3	2	Gapdh	21.1036		G6	G256W/+	26.5271	20.7627	0.0730861	0.113049
W3	3	Kcnq2	25.7325
W4	1	Gapdh	20.2263
W4	2	Kcnq2	25.3247
W4	3	Gapdh	20.1984
W4	1	Kcnq2	25.2415
W4	2	Gapdh	20.229
W4	3	Kcnq2	25.2584
W5	1	Gapdh	19.7607
W5	2	Kcnq2	24.6193
W5	3	Gapdh	19.7515
W5	1	Kcnq2	24.6585
W5	2	Gapdh	19.6432
W5	3	Kcnq2	24.5941
W6	1	Gapdh	20.0731
W6	2	Kcnq2	24.9671
W6	3	Gapdh	20.025
W6	1	Kcnq2	24.9099
W6	2	Gapdh	19.988
W6	3	Kcnq2	24.9089
D1	1	Gapdh	20.2955
D1	2	Kcnq2	26.0609
D1	3	Gapdh	20.33
D1	1	Kcnq2	26.0714
D1	2	Gapdh	20.2483
D1	3	Kcnq2	26.0401
D2	1	Gapdh	20.4356
D2	2	Kcnq2	26.4218
D2	3	Gapdh	20.4735
D2	1	Kcnq2	26.4517
D2	2	Gapdh	20.5089
D2	3	Kcnq2	26.4954
D3	1	Gapdh	21.0998
D3	2	Kcnq2	26.7495
D3	3	Gapdh	21.1062
D3	1	Kcnq2	26.7943
D3	2	Gapdh	21.0578
D3	3	Kcnq2	26.7642
D4	1	Gapdh	20.6889
D4	2	Kcnq2	26.5252
D4	3	Gapdh	20.7409
D4	1	Kcnq2	26.5852
D4	2	Gapdh	20.6536
D4	3	Kcnq2	26.5122
D5	1	Gapdh	20.8074
D5	2	Kcnq2	26.5592
D5	3	Gapdh	20.9022
D5	1	Kcnq2	26.6389
D5	2	Gapdh	20.7904
D5	3	Kcnq2	26.523
D6	1	Gapdh	19.4464
D6	2	Kcnq2	25.0986
D6	3	Gapdh	19.4866
D6	1	Kcnq2	25.1237
D6	2	Gapdh	19.4527
D6	3	Kcnq2	25.1565
G1	1	Gapdh	20.9382
G1	2	Kcnq2	26.817
G1	3	Gapdh	20.9874
G1	1	Kcnq2	26.7872
G1	2	Gapdh	20.9772
G1	3	Kcnq2	26.8441
G2	1	Gapdh	20.5101
G2	2	Kcnq2	26.5379
G2	3	Gapdh	20.4656
G2	1	Kcnq2	26.6135
G2	2	Gapdh	20.3724
G2	3	Kcnq2	26.5178
G3	1	Gapdh	19.9805
G3	2	Kcnq2	25.9051
G3	3	Gapdh	19.9296
G3	1	Kcnq2	25.9015
G3	2	Gapdh	19.9691
G3	3	Kcnq2	25.9173
G5	1	Gapdh	20.3957
G5	2	Kcnq2	26.1895
G5	3	Gapdh	20.1577
G5	1	Kcnq2	25.9427
G5	2	Gapdh	20.4281
G5	3	Kcnq2	26.2423
G6	1	Gapdh	20.7882
G6	2	Kcnq2	26.4951
G6	3	Gapdh	20.8609
G6	1	Kcnq2	26.6107
G6	2	Gapdh	20.6391
G6	3	Kcnq2	26.4755
