# Supplementary material for: Plural molecular and cellular mechanisms of pore domain KCNQ2 encephalopathy
Source: eLife. 2025 Jan 6;13:RP91204. doi: 10.7554/eLife.91204 (PMC11703504; doi:10.7554/eLife.91204)
Supplement: Figure 7—source data 4. [file elife-91204-fig7-data4.xlsx]

## Sheet: Metadata
Mouse ID	Strain	Tube Label	DOB	DOD	Sex	Age (Days)	Genotype
T104.2-3	G256W	WF1	2020-04-06	2020-06-24	F	79	WT
A102.2-4	G256W	WF2	2020-03-08	2020-07-07	F	121	WT
187.4-3	G256W	WF3	2020-03-08	2020-07-14	F	128	WT
T103.1-3	G256W	WM1	2020-03-14	2020-07-20	M	128	WT
T102.1-5	G256W	WM2	2020-03-10	2020-06-24	M	106	WT
T104.1-1	G256W	WM3	2020-03-16	2020-07-08	M	114	WT
190.2-3	E254fs	DF1	2020-03-25	2020-07-16	F	113	Het
190.2-5	E254fs	DF2	2020-03-25	2020-07-16	F	113	Het
190.2-7	E254fs	DF3	2020-03-25	2020-07-16	F	113	Het
211.1-2	E254fs	DM1	2020-03-02	2020-07-08	M	128	Het
211.1-3	E254fs	DM2	2020-03-02	2020-07-08	M	128	Het
211.2-3	E254fs	DM3	2020-04-16	2020-07-16	M	91	Het
T102.1-1	G256W	GF1	2020-03-10	2020-06-24	F	106	Het
T102.1-3	G256W	GF2	2020-03-10	2020-06-24	F	106	Het
T102.1-6	G256W	GF3	2020-03-10	2020-06-24	F	106	Het
T104.1-3	G256W	GM1	2020-03-16	2020-07-20	M	126	Het
T102.1-2	G256W	GM2	2020-03-10	2020-06-24	M	106	Het
T102.1-4	G256W	GM3	2020-03-10	2020-06-24	M	106	Het

## Sheet: Hippocampus Kcnq2 Quant
Mouse ID	Strain	Tube Label	DOB	DOD	Sex	Age (Days)	Genotype	Fold Change
T102.1-1	G256W	GF1	2020-03-10	2020-06-24	F	106	Het	0.44577		Genotype	Average Fold Change	SEM
T102.1-3	G256W	GF2	2020-03-10	2020-06-24	F	106	Het	0.444579		WT	1.00622	0.047978
T102.1-6	G256W	GF3	2020-03-10	2020-06-24	F	106	Het	0.413482		G256W	0.438764	0.0299555
190.2-3	E254fs	DF1	2020-03-25	2020-07-16	F	113	Het	0.469919		E254fs	0.510632	0.0529115
190.2-5	E254fs	DF2	2020-03-25	2020-07-16	F	113	Het	0.400006
190.2-7	E254fs	DF3	2020-03-25	2020-07-16	F	113	Het	0.76709
T104.1-3	G256W	GM1	2020-03-16	2020-07-20	M	126	Het	0.564528
T102.1-2	G256W	GM2	2020-03-10	2020-06-24	M	106	Het	0.337603
T102.1-4	G256W	GM3	2020-03-10	2020-06-24	M	106	Het	0.426619
211.1-2	E254fs	DM1	2020-03-02	2020-07-08	M	128	Het	0.45571
211.1-3	E254fs	DM2	2020-03-02	2020-07-08	M	128	Het	0.48073
211.2-3	E254fs	DM3	2020-04-16	2020-07-16	M	91	Het	0.490338
T104.2-3	G256W	WF1	2020-04-06	2020-06-24	F	79	WT	1.09714
A102.2-4	G256W	WF2	2020-03-08	2020-07-07	F	121	WT	1.05056
187.4-3	G256W	WF3	2020-03-08	2020-07-14	F	128	WT	0.799241
T103.1-3	G256W	WM1	2020-03-14	2020-07-20	M	128	WT	0.93263
T102.1-5	G256W	WM2	2020-03-10	2020-06-24	M	106	WT	1.08154
T104.1-1	G256W	WM3	2020-03-16	2020-07-08	M	114	WT	1.07618

## Sheet: One sample ttest Hip Q2
E254fs Kcnq2 fold change		Sample size	6
0.469919		Sample mean	0.510632
0.400006		Sample standard deviation	0.129606
0.76709		Sample SEM	0.021601
0.45571		Degrees of freedom	5
0.48073		Hypothesized mean	0.5
0.490338		T statistic t	0.492213
		P-value	0.643417

## Sheet: Hippocampus Kcnq2 Data
5.56847	GF1		DeltaCt	DeltaDeltaCT	Fold Change
5.47475	GF1	GF1	5.50967	1.16563	0.44577
5.4858	GF1	GF2	5.51353	1.16949	0.444579
5.46095	GF2	GF3	5.61815	1.2741	0.413482
5.47353	GF2	DF1	5.43356	1.08952	0.469919
5.60611	GF2	DF2	5.66595	1.32191	0.400006
5.59404	GF3	DF3	4.72658	0.382531	0.76709
5.62791	GF3	GM1	5.16893	0.824882	0.564528
5.6325	GF3	GM2	5.91065	1.5666	0.337603
5.4129	DF1	GM3	5.57303	1.22898	0.426619
5.42287	DF1	DM1	5.47786	1.13381	0.45571
5.46491	DF1	DM2	5.40075	1.0567	0.48073
5.65598	DF2	DM3	5.3722	1.02815	0.490338
5.64864	DF2	WF1	4.21029	-0.133751	1.09714
5.69323	DF2	WF2	4.27288	-0.0711651	1.05056
4.75233	DF3	WF3	4.66734	0.323298	0.799241
4.71911	DF3	WM1	4.44467	0.100623	0.93263
4.70829	DF3	WM2	4.23096	-0.113087	1.08154
4.2227	WF1	WM3	4.23813	-0.105918	1.07618
4.18356	WF1
4.22462	WF1
4.29939	WF2
4.25587	WF2
4.26338	WF2
4.67059	WF3
4.6843	WF3
4.64713	WF3
5.20465	GM1
5.1956	GM1
5.10653	GM1
6.01158	GM2
5.90853	GM2
5.81183	GM2
5.5309	GM3
5.6112	GM3
5.57698	GM3
5.38681	DM1
5.47491	DM1
5.57186	DM1
5.56769	DM2
5.29493	DM2
5.33962	DM2
5.31211	DM3
5.42547	DM3
5.379	DM3
5.31073	WM1
3.99853	WM1
4.02475	WM1
4.20319	WM2
4.23765	WM2
4.25204	WM2
4.27501	WM3
4.26645	WM3
4.17292	WM3

## Sheet: Hippocampus Kcnq2 CT QC
Animal	Technical replicate number	Target	Cycle threshold (CT)		Animal	Genotype	Average Kcnq2 CT	Average Gapdh CT	SD Kcnq2 CT	SD Gapdh CT		Genotype	Average Kcnq2 CT	SEM Kcnq2 CT
WF1	1	Gapdh	20.011		WF1	WT	24.1883	19.9783	0.0430968	0.0283608		WT	23.9634	0.16095
WF1	2	Kcnq2	24.233		WF2	WT	24.3307	20.0577	0.0517912	0.0505008		E254fs/+	25.2389	0.153524
WF1	3	Gapdh	19.964		WF3	WT	24.3243	19.657	0.0506392	0.0339559		G256W/+	25.1913	0.191718
WF1	1	Kcnq2	24.147		WM1	WT	23.5317	19.5047	0.015885	0.0172143
WF1	2	Gapdh	19.96		WM2	WT	23.9663	19.7357	0.0140119	0.0357957		Genotype	Average Gapdh CT	SEM Gapdh CT
WF1	3	Kcnq2	24.185		WM3	WT	23.439	19.2007	0.0905704	0.0365285		WT	19.689	0.128489
WF2	1	Gapdh	20.058		DF1	E254fs/+	25.3247	19.891	0.0832847	0.0661438		E254fs/+	19.897	0.0944926
WF2	2	Kcnq2	24.357		DF2	E254fs/+	25.6447	19.9787	0.0368284	0.0140119		G256W/+	19.6613	0.120807
WF2	3	Gapdh	20.108		DF3	E254fs/+	24.705	19.9783	0.0257099	0.0147422
WF2	1	Kcnq2	24.364		DM1	E254fs/+	25.2283	19.6903	0.0840079	0.0983328
WF2	2	Gapdh	20.007		DM2	E254fs/+	24.913	19.5973	0.189042	0.178912
WF2	3	Kcnq2	24.271		DM3	E254fs/+	25.618	20.2463	0.215965	0.159519
WF3	1	Gapdh	19.641		GF1	G256W/+	24.8083	19.2987	0.106978	0.0563678
WF3	2	Kcnq2	24.312		GF2	G256W/+	25.519	20.0057	0.161149	0.235173
WF3	3	Gapdh	19.696		GF3	G256W/+	25.1733	19.5553	0.220618	0.23057
WF3	1	Kcnq2	24.38		GM1	G256W/+	24.466	19.3948	0.281384	0.26972
WF3	2	Gapdh	19.634		GM2	G256W/+	25.631	19.736	0.130042	0.0947523
WF3	3	Kcnq2	24.281		GM3	G256W/+	25.5503	19.9773	0.250815	0.23356
WM1	1	Gapdh	19.491
WM1	2	Kcnq2	23.55
WM1	3	Gapdh	19.524
WM1	1	Kcnq2	23.522
WM1	2	Gapdh	19.499
WM1	3	Kcnq2	23.523
WM2	1	Gapdh	19.777
WM2	2	Kcnq2	23.98
WM2	3	Gapdh	19.715
WM2	1	Kcnq2	23.952
WM2	2	Gapdh	19.715
WM2	3	Kcnq2	23.967
WM3	1	Gapdh	19.238
WM3	2	Kcnq2	23.513
WM3	3	Gapdh	19.199
WM3	1	Kcnq2	23.466
WM3	2	Gapdh	19.165
WM3	3	Kcnq2	23.338
DF1	1	Gapdh	19.816
DF1	2	Kcnq2	25.229
DF1	3	Gapdh	19.941
DF1	1	Kcnq2	25.364
DF1	2	Gapdh	19.916
DF1	3	Kcnq2	25.381
DF2	1	Gapdh	19.983
DF2	2	Kcnq2	25.639
DF2	3	Gapdh	19.963
DF2	1	Kcnq2	25.611
DF2	2	Gapdh	19.99
DF2	3	Kcnq2	25.684
DF3	1	Gapdh	19.973
DF3	2	Kcnq2	24.725
DF3	3	Gapdh	19.995
DF3	1	Kcnq2	24.714
DF3	2	Gapdh	19.967
DF3	3	Kcnq2	24.676
DM1	1	Gapdh	19.753
DM1	2	Kcnq2	25.227
DM1	3	Gapdh	19.741
DM1	1	Kcnq2	25.313
DM1	2	Gapdh	19.577
DM1	3	Kcnq2	25.145
DM2	1	Gapdh	19.65
DM2	2	Kcnq2	24.945
DM2	3	Gapdh	19.744
DM2	1	Kcnq2	25.084
DM2	2	Gapdh	19.398
DM2	3	Kcnq2	24.71
DM3	1	Gapdh	20.369
DM3	2	Kcnq2	25.794
DM3	3	Gapdh	20.304
DM3	1	Kcnq2	25.683
DM3	2	Gapdh	20.066
DM3	3	Kcnq2	25.377
GF1	1	Gapdh	19.362
GF1	2	Kcnq2	24.93
GF1	3	Gapdh	19.254
GF1	1	Kcnq2	24.729
GF1	2	Gapdh	19.28
GF1	3	Kcnq2	24.766
GF2	1	Gapdh	20.223
GF2	2	Kcnq2	25.684
GF2	3	Gapdh	20.038
GF2	1	Kcnq2	25.511
GF2	2	Gapdh	19.756
GF2	3	Kcnq2	25.362
GF3	1	Gapdh	19.669
GF3	2	Kcnq2	25.263
GF3	3	Gapdh	19.707
GF3	1	Kcnq2	25.335
GF3	2	Gapdh	19.29
GF3	3	Kcnq2	24.922
GM1	1	Gapdh	19.454
GM1	2	Kcnq2	24.658
GM1	3	Gapdh	19.401
GM1	1	Kcnq2	24.597
GM1	2	Gapdh	19.036
GM1	3	Kcnq2	24.143
GM1	1	Gapdh	19.688
GM2	2	Kcnq2	25.7
GM2	3	Gapdh	19.803
GM2	1	Kcnq2	25.712
GM2	2	Gapdh	19.669
GM2	3	Kcnq2	25.481
GM3	1	Gapdh	19.996
GM3	2	Kcnq2	25.527
GM3	3	Gapdh	20.201
GM3	1	Kcnq2	25.812
GM3	2	Gapdh	19.735
GM3	3	Kcnq2	25.312

## Sheet: Cortex Kcnq2 Quant
Mouse ID	Strain	Tube Label	DOB	DOD	Sex	Genotype	Fold Change
T102.1-1	G256W	GF1	2020-03-10	2020-06-24	F	Het	0.499586		Genotype	Average Fold Change	SEM
T102.1-3	G256W	GF2	2020-03-10	2020-06-24	F	Het	0.544471		WT	1.00213	0.0297537
T102.1-6	G256W	GF3	2020-03-10	2020-06-24	F	Het	0.516034		G256W	0.503534	0.0264902
190.2-3	E254fs	DF1	2020-03-25	2020-07-16	F	Het	0.502958		E254fs	0.515673	0.019415
190.2-5	E254fs	DF2	2020-03-25	2020-07-16	F	Het	0.509956
190.2-7	E254fs	DF3	2020-03-25	2020-07-16	F	Het	0.458866
T104.1-3	G256W	GM1	2020-03-16	2020-07-20	M	Het	0.530716
T102.1-2	G256W	GM2	2020-03-10	2020-06-24	M	Het	0.377089
T102.1-4	G256W	GM3	2020-03-10	2020-06-24	M	Het	0.553306
211.1-2	E254fs	DM1	2020-03-02	2020-07-08	M	Het	0.500191
211.1-3	E254fs	DM2	2020-03-02	2020-07-08	M	Het	0.603057
211.2-3	E254fs	DM3	2020-04-16	2020-07-16	M	Het	0.519008
T104.2-3	G256W	WF1	2020-04-06	2020-06-24	F	WT	0.944373
A102.2-4	G256W	WF2	2020-03-08	2020-07-07	F	WT	0.930487
187.4-3	G256W	WF3	2020-03-08	2020-07-14	F	WT	0.977869
T103.1-3	G256W	WM1	2020-03-14	2020-07-20	M	WT	0.998303
T102.1-5	G256W	WM2	2020-03-10	2020-06-24	M	WT	1.1313
T104.1-1	G256W	WM3	2020-03-16	2020-07-08	M	WT	1.03045

## Sheet: One Sample ttest CTX Q2
E254fs Kcnq2 fold change		Sample size	6
0.502958		Sample mean	0.515673
0.509956		Sample standard deviation	0.0475567
0.458866		Sample SEM	0.00792612
0.500191		Degrees of freedom	5
0.603057		Hypothesized mean	0.5
0.519008		T statistic t	1.97737
		P-value	0.104931

## Sheet: Cortex Kcnq2 Data
			DeltaCt	DeltaDeltaCT	Fold Change
5.4272	GF1	GF1	5.4515	1.0012	0.499586
5.47839	GF1	GF2	5.32738	0.877073	0.544471
5.44892	GF1	GF3	5.40477	0.954461	0.516034
5.24888	GF2	DF1	5.4418	0.991491	0.502958
5.33425	GF2	DF2	5.42186	0.971554	0.509956
5.39902	GF2	DF3	5.57416	1.12385	0.458866
5.36815	GF3	GM1	5.3643	0.913989	0.530716
5.35425	GF3	GM2	5.85733	1.40702	0.377089
5.49191	GF3	GM3	5.30416	0.853851	0.553306
5.38971	DF1	DM1	5.44976	0.999449	0.500191
5.46318	DF1	DM2	5.17994	0.729633	0.603057
5.47251	DF1	DM3	5.39648	0.94617	0.519008
5.41509	DF2	WF1	4.53288	0.082571	0.944373
5.39213	DF2	WF2	4.55425	0.103942	0.930487
5.45837	DF2	WF3	4.4826	0.032287	0.977869
5.53764	DF3	WM1	4.45276	0.00245031	0.998303
5.63499	DF3	WM2	4.27233	-0.177981	1.1313
5.54986	DF3	WM3	4.40704	-0.0432695	1.03045
5.30999	GM1
5.40494	GM1
5.37796	GM1
5.8873	GM2
5.83219	GM2
5.8525	GM2
5.29542	GM3
5.28691	GM3
5.33015	GM3
5.4897	DM1
5.41724	DM1
5.44234	DM1
5.1347	DM2
5.18002	DM2
5.22511	DM2
5.37659	DM3
5.39932	DM3
5.41352	DM3
4.46155	WF1
4.42913	WF1
4.70797	WF1
4.52877	WF2
4.55852	WF2
4.57546	WF2
4.47968	WF3
4.49617	WF3
4.47193	WF3
4.51644	WM1
4.37598	WM1
4.46586	WM1
4.27723	WM2
4.23654	WM2
4.30322	WM2
4.42194	WM3
4.38617	WM3
4.41301	WM3

## Sheet: Cortex Kcnq2 CT QC
Animal	Technical replicate number	Target	Cycle threshold (CT)		Animal	Genotype	Average Kcnq2 CT	Average Gapdh CT	SD Kcnq2 CT	SD Gapdh CT		Genotype	Average Kcnq2 CT	SEM Kcnq2 CT
WF1	1	Gapdh	19.8842		WF1	WT	24.4374	19.9045	0.128814	0.0418843		WT	24.2571	0.141892
WF1	2	Kcnq2	24.3457		WF2	WT	23.971	19.4168	0.0216116	0.00634775		E254fs/+	24.9927	0.0531096
WF1	3	Gapdh	19.9527		WF3	WT	24.8538	20.3712	0.02903	0.0182241		G256W/+	25.1568	0.105394
WF1	1	Kcnq2	24.3818		WM1	WT	24.2346	19.7818	0.0504332	0.0511715
WF1	2	Gapdh	19.8767		WM2	WT	24.1304	19.8581	0.0135736	0.0239034		Genotype	Average Gapdh CT	SEM Gapdh CT
WF1	3	Kcnq2	24.5847		WM3	WT	23.915	19.508	0.0349062	0.0230999		WT	19.8067	0.138177
WF2	1	Gapdh	19.4174		DF1	E254fs/+	24.8148	19.373	0.0140779	0.0322052		E254fs/+	19.5821	0.0596478
WF2	2	Kcnq2	23.9462		DF2	E254fs/+	25.179	19.7572	0.0192487	0.0196443		G256W/+	19.7052	0.0730634
WF2	3	Gapdh	19.4228		DF3	E254fs/+	25.0389	19.4648	0.0474602	0.00640617
WF2	1	Kcnq2	23.9813		DM1	E254fs/+	25.0663	19.6165	0.0169411	0.0209059
WF2	2	Gapdh	19.4101		DM2	E254fs/+	24.8932	19.7133	0.00849037	0.0493944
WF2	3	Kcnq2	23.9856		DM3	E254fs/+	24.964	19.5676	0.00840297	0.0116629
WF3	1	Gapdh	20.3804		GF1	G256W/+	25.0653	19.6138	0.0456894	0.0226615
WF3	2	Kcnq2	24.8601		GF2	G256W/+	24.916	19.5886	0.0313894	0.0582978
WF3	3	Gapdh	20.3831		GF3	G256W/+	24.9088	19.504	0.0586785	0.0215464
WF3	1	Kcnq2	24.8792		GM1	G256W/+	25.1585	19.7942	0.034294	0.0268481
WF3	2	Gapdh	20.3503		GM2	G256W/+	25.5839	19.7266	0.0197126	0.0204425
WF3	3	Kcnq2	24.8222		GM3	G256W/+	25.3083	20.0041	0.0229417	0.0232213
WM1	1	Gapdh	19.776
WM1	2	Kcnq2	24.2924
WM1	3	Gapdh	19.8357
WM1	1	Kcnq2	24.2117
WM1	2	Gapdh	19.7338
WM1	3	Kcnq2	24.1997
WM2	1	Gapdh	19.8638
WM2	2	Kcnq2	24.141
WM2	3	Gapdh	19.8786
WM2	1	Kcnq2	24.1151
WM2	2	Gapdh	19.8318
WM2	3	Kcnq2	24.135
WM3	1	Gapdh	19.533
WM3	2	Kcnq2	23.9549
WM3	3	Gapdh	19.5037
WM3	1	Kcnq2	23.8899
WM3	2	Gapdh	19.4874
WM3	3	Kcnq2	23.9004
DF1	1	Gapdh	19.4092
DF1	2	Kcnq2	24.7989
DF1	3	Gapdh	19.3624
DF1	1	Kcnq2	24.8256
DF1	2	Gapdh	19.3475
DF1	3	Kcnq2	24.82
DF2	1	Gapdh	19.7495
DF2	2	Kcnq2	25.1646
DF2	3	Gapdh	19.7795
DF2	1	Kcnq2	25.1716
DF2	2	Gapdh	19.7425
DF2	3	Kcnq2	25.2009
DF3	1	Gapdh	19.4714
DF3	2	Kcnq2	25.0091
DF3	3	Gapdh	19.4587
DF3	1	Kcnq2	25.0936
DF3	2	Gapdh	19.4642
DF3	3	Kcnq2	25.014
DM1	1	Gapdh	19.5961
DM1	2	Kcnq2	25.0858
DM1	3	Gapdh	19.6378
DM1	1	Kcnq2	25.0551
DM1	2	Gapdh	19.6156
DM1	3	Kcnq2	25.058
DM2	1	Gapdh	19.7666
DM2	2	Kcnq2	24.9013
DM2	3	Gapdh	19.7043
DM2	1	Kcnq2	24.8843
DM2	2	Gapdh	19.669
DM2	3	Kcnq2	24.8941
DM3	1	Gapdh	19.5777
DM3	2	Kcnq2	24.9543
DM3	3	Gapdh	19.5701
DM3	1	Kcnq2	24.9694
DM3	2	Gapdh	19.5548
DM3	3	Kcnq2	24.9684
GF1	1	Gapdh	19.5876
GF1	2	Kcnq2	25.0148
GF1	3	Gapdh	19.6255
GF1	1	Kcnq2	25.1039
GF1	2	Gapdh	19.6281
GF1	3	Kcnq2	25.0771
GF2	1	Gapdh	19.6332
GF2	2	Kcnq2	24.8821
GF2	3	Gapdh	19.6099
GF2	1	Kcnq2	24.9441
GF2	2	Gapdh	19.5226
GF2	3	Kcnq2	24.9216
GF3	1	Gapdh	19.5249
GF3	2	Kcnq2	24.893
GF3	3	Gapdh	19.5054
GF3	1	Kcnq2	24.8596
GF3	2	Gapdh	19.4819
GF3	3	Kcnq2	24.9738
GM1	1	Gapdh	19.8219
GM1	2	Kcnq2	25.1319
GM1	3	Gapdh	19.7923
GM1	1	Kcnq2	25.1972
GM1	2	Gapdh	19.7683
GM1	3	Kcnq2	25.1463
GM2	1	Gapdh	19.7049
GM2	2	Kcnq2	25.5922
GM2	3	Gapdh	19.7292
GM2	1	Kcnq2	25.5614
GM2	2	Gapdh	19.7456
GM2	3	Kcnq2	25.5981
GM3	1	Gapdh	20.0304
GM3	2	Kcnq2	25.3259
GM3	3	Gapdh	19.9954
GM3	1	Kcnq2	25.2823
GM3	2	Gapdh	19.9865
GM3	3	Kcnq2	25.3166
