# Supplementary material for: Plural molecular and cellular mechanisms of pore domain KCNQ2 encephalopathy
Source: eLife. 2025 Jan 6;13:RP91204. doi: 10.7554/eLife.91204 (PMC11703504; doi:10.7554/eLife.91204)
Supplement: Figure 7—source data 5. [file elife-91204-fig7-data5.xlsx]

## Sheet: P21 Hip Fold-change
Sample Name	Sex	Assay	Delta Ct		Animal ID	Sample Name	Genotype	Assay type	Sex	DeltaCt	Stdev Tech Reps	DeltaDeltaCT	Fold Change
W1	F	Non-Allele Specific	5.29221		A120.1-2	W1	WT	Non-Allele Specific	F	5.28044	0.0179704	0.432343	0.741058
W1	F	Non-Allele Specific	5.25976		A120.1-4	W2	WT	Non-Allele Specific	F	4.72741	0.0468716	-0.120689	1.08725
W1	F	Non-Allele Specific	5.28936		A120.3-11	W3	WT	Non-Allele Specific	F	4.665	0.0203199	-0.183099	1.13532
W2	F	Non-Allele Specific	4.71065		A120.3-2	W4	WT	Non-Allele Specific	M	4.79476	0.0371253	-0.0533377	1.03766
W2	F	Non-Allele Specific	4.69123		A120.3-4	W5	WT	Non-Allele Specific	M	4.83923	0.0357553	-0.00887489	1.00617
W2	F	Non-Allele Specific	4.78036		A120.3-5	W6	WT	Non-Allele Specific	M	4.78176	0.0345661	-0.0663414	1.04706
W3	F	Non-Allele Specific	4.6859		D105.2-3	D1	E254fs/+	Non-Allele Specific	F	5.28521	0.0200682	0.437111	0.738612
W3	F	Non-Allele Specific	4.6638		D100.5-2	D2	E254fs/+	Non-Allele Specific	F	5.21974	0.0238325	0.371638	0.772904
W3	F	Non-Allele Specific	4.64531		D105.4-5	D3	E254fs/+	Non-Allele Specific	F	5.55803	0.0351438	0.709928	0.611351
W4	M	Non-Allele Specific	4.83759		D100.5-1	D4	E254fs/+	Non-Allele Specific	M	5.46816	0.0241682	0.620064	0.650642
W4	M	Non-Allele Specific	4.77174		D105.4-4	D5	E254fs/+	Non-Allele Specific	M	5.24427	0.0143793	0.396167	0.759874
W4	M	Non-Allele Specific	4.77496		D105.6-1	D6	E254fs/+	Non-Allele Specific	M	4.97438	0.0431303	0.126275	0.916194
W5	M	Non-Allele Specific	4.79803		A120.1-2	W1	WT	WT Allele Specific	F	5.84559	0.0461248	0.36573	0.776076
W5	M	Non-Allele Specific	4.85749		A120.1-4	W2	WT	WT Allele Specific	F	5.50076	0.0095616	0.0209019	0.985616
W5	M	Non-Allele Specific	4.86216		A120.3-11	W3	WT	WT Allele Specific	F	5.255	0.00698273	-0.224864	1.16867
W6	M	Non-Allele Specific	4.82119		A120.3-2	W4	WT	WT Allele Specific	M	5.46052	0.024723	-0.0193413	1.0135
W6	M	Non-Allele Specific	4.75667		A120.3-4	W5	WT	WT Allele Specific	M	5.40047	0.0546027	-0.0793922	1.05657
W6	M	Non-Allele Specific	4.76742		A120.3-5	W6	WT	WT Allele Specific	M	5.41683	0.0297036	-0.0630348	1.04466
D1	M	Non-Allele Specific	5.2634		D105.2-3	D1	E254fs/+	WT Allele Specific	F	6.50423	0.0507149	1.02437	0.491624
D1	F	Non-Allele Specific	5.28935		D100.5-2	D2	E254fs/+	WT Allele Specific	F	6.44517	0.0167503	0.965306	0.51217
D1	F	Non-Allele Specific	5.30289		D105.4-5	D3	E254fs/+	WT Allele Specific	F	6.78111	0.0262495	1.30124	0.405776
D2	F	Non-Allele Specific	5.24674		D100.5-1	D4	E254fs/+	WT Allele Specific	M	6.51517	0.0475895	1.03531	0.487912
D2	F	Non-Allele Specific	5.21086		D105.4-4	D5	E254fs/+	WT Allele Specific	M	6.36791	0.0322634	0.888044	0.540346
D2	F	Non-Allele Specific	5.20162		D105.6-1	D6	E254fs/+	WT Allele Specific	M	6.20924	0.0242998	0.729383	0.603162
D3	F	Non-Allele Specific	5.59688
D3	F	Non-Allele Specific	5.54877
D3	F	Non-Allele Specific	5.52844
D4	F	Non-Allele Specific	5.44044
D4	M	Non-Allele Specific	5.48477
D4	M	Non-Allele Specific	5.47929
D5	M	Non-Allele Specific	5.23466
D5	M	Non-Allele Specific	5.2608
D5	M	Non-Allele Specific	5.23734
D6	M	Non-Allele Specific	4.96823
D6	M	Non-Allele Specific	4.93465
D6	M	Non-Allele Specific	5.02025
W1	F	WT Allele Specific	5.79873
W1	F	WT Allele Specific	5.8471
W1	F	WT Allele Specific	5.89094
W2	F	WT Allele Specific	5.51175
W2	F	WT Allele Specific	5.49437
W2	F	WT Allele Specific	5.49616
W3	F	WT Allele Specific	5.25911
W3	F	WT Allele Specific	5.24693
W3	F	WT Allele Specific	5.25894
W4	M	WT Allele Specific	5.46799
W4	M	WT Allele Specific	5.43292
W4	M	WT Allele Specific	5.48064
W5	M	WT Allele Specific	5.34764
W5	M	WT Allele Specific	5.39707
W5	M	WT Allele Specific	5.45669
W6	M	WT Allele Specific	5.38434
W6	M	WT Allele Specific	5.44261
W6	M	WT Allele Specific	5.42353
D1	M	WT Allele Specific	6.45159
D1	F	WT Allele Specific	6.50833
D1	F	WT Allele Specific	6.55277
D2	F	WT Allele Specific	6.46062
D2	F	WT Allele Specific	6.42737
D2	F	WT Allele Specific	6.44752
D3	F	WT Allele Specific	6.75113
D3	F	WT Allele Specific	6.79217
D3	F	WT Allele Specific	6.80001
D4	F	WT Allele Specific	6.46476
D4	M	WT Allele Specific	6.55932
D4	M	WT Allele Specific	6.52142
D5	M	WT Allele Specific	6.36247
D5	M	WT Allele Specific	6.40254
D5	M	WT Allele Specific	6.3387
D6	M	WT Allele Specific	6.2303
D6	M	WT Allele Specific	6.18266
D6	M	WT Allele Specific	6.21477

## Sheet: P21 Hip CT Quality check
Animal	Assay	Technical replicate number	Target	Cycle threshold (CT)		Animal	Assay	Genotype	Average Kcnq2 CT	Average Gapdh CT	SD Kcnq2 CT	SD Gapdh CT		Genotype	Assay	Average Kcnq2 CT	SEM Kcnq2 CT
W1	Non-Allele Specific	1	Gapdh	20.2398		W1	Non-Allele Specific	WT	25.5287	20.2482	0.0111495	0.0266005		WT	Non-Allele Specific	25.2046	0.0928427
W1	Non-Allele Specific	2	Kcnq2	25.532		W2	Non-Allele Specific	WT	25.1336	20.4062	0.0470578	0.0294548		E254fs/+	Non-Allele Specific	25.4699	0.0986068
W1	Non-Allele Specific	3	Gapdh	20.278		W3	Non-Allele Specific	WT	24.8421	20.1771	0.0214997	0.0170727		WT	WT Allele Specific	25.8905	0.0854289
W1	Non-Allele Specific	1	Kcnq2	25.5378		W4	Non-Allele Specific	WT	25.3056	20.5109	0.0238537	0.0151994		E254fs/+	WT Allele Specific	26.7095	0.0953759
W1	Non-Allele Specific	2	Gapdh	20.2269		W5	Non-Allele Specific	WT	25.1501	20.3109	0.0129433	0.0356491
W1	Non-Allele Specific	3	Kcnq2	25.5162		W6	Non-Allele Specific	WT	25.2674	20.4856	0.0573165	0.022796		Genotype	Assay	Average Gapdh CT	SEM Gapdh CT
W2	Non-Allele Specific	1	Gapdh	20.3787		D1	Non-Allele Specific	E254fs/+	25.425	20.1398	0.0254077	0.0441671		WT	Non-Allele Specific	20.3565	0.0544592
W2	Non-Allele Specific	2	Kcnq2	25.0893		D2	Non-Allele Specific	E254fs/+	25.6411	20.4214	0.0412697	0.0205173		E254fs/+	Non-Allele Specific	20.1782	0.0778868
W2	Non-Allele Specific	3	Gapdh	20.4373		D3	Non-Allele Specific	E254fs/+	25.7812	20.2232	0.0521269	0.0203282		WT	WT Allele Specific	20.4107	0.0432405
W2	Non-Allele Specific	1	Kcnq2	25.1285		D4	Non-Allele Specific	E254fs/+	25.3279	19.8597	0.058387	0.053923		E254fs/+	WT Allele Specific	20.2391	0.0708461
W2	Non-Allele Specific	2	Gapdh	20.4027		D5	Non-Allele Specific	E254fs/+	25.5451	20.3008	0.028012	0.0301573
W2	Non-Allele Specific	3	Kcnq2	25.183		D6	Non-Allele Specific	E254fs/+	25.0989	20.1245	0.016015	0.0487181
W3	Non-Allele Specific	1	Gapdh	20.1794		W1	WT Allele Specific	WT	26.1497	20.3041	0.0111495	0.0266005
W3	Non-Allele Specific	2	Kcnq2	24.8653		W2	WT Allele Specific	WT	25.9534	20.4527	0.0470578	0.0294548
W3	Non-Allele Specific	3	Gapdh	20.159		W3	WT Allele Specific	WT	25.5522	20.2973	0.0214997	0.0170727
W3	Non-Allele Specific	1	Kcnq2	24.8228		W4	WT Allele Specific	WT	26.0279	20.5674	0.0238537	0.0151994
W3	Non-Allele Specific	2	Gapdh	20.1929		W5	WT Allele Specific	WT	25.7701	20.3696	0.0129433	0.0356491
W3	Non-Allele Specific	3	Kcnq2	24.8382		W6	WT Allele Specific	WT	25.8898	20.473	0.0573165	0.022796
W4	Non-Allele Specific	1	Gapdh	20.495		D1	WT Allele Specific	E254fs/+	26.7315	20.2272	0.0254077	0.0441671
W4	Non-Allele Specific	2	Kcnq2	25.3326		D2	WT Allele Specific	E254fs/+	26.9393	20.4941	0.0412697	0.0205173
W4	Non-Allele Specific	3	Gapdh	20.5253		D3	WT Allele Specific	E254fs/+	27.0003	20.2192	0.0521269	0.0203282
W4	Non-Allele Specific	1	Kcnq2	25.297		D4	WT Allele Specific	E254fs/+	26.4736	19.9585	0.058387	0.053923
W4	Non-Allele Specific	2	Gapdh	20.5123		D5	WT Allele Specific	E254fs/+	26.6836	20.3157	0.028012	0.0301573
W4	Non-Allele Specific	3	Kcnq2	25.2873		D6	WT Allele Specific	E254fs/+	26.4289	20.2197	0.016015	0.0487181
W5	Non-Allele Specific	1	Gapdh	20.3502
W5	Non-Allele Specific	2	Kcnq2	25.1482
W5	Non-Allele Specific	3	Gapdh	20.2807
W5	Non-Allele Specific	1	Kcnq2	25.1382
W5	Non-Allele Specific	2	Gapdh	20.3017
W5	Non-Allele Specific	3	Kcnq2	25.1639
W6	Non-Allele Specific	1	Gapdh	20.5119
W6	Non-Allele Specific	2	Kcnq2	25.3331
W6	Non-Allele Specific	3	Gapdh	20.4708
W6	Non-Allele Specific	1	Kcnq2	25.2275
W6	Non-Allele Specific	2	Gapdh	20.4742
W6	Non-Allele Specific	3	Kcnq2	25.2416
D1	Non-Allele Specific	1	Gapdh	20.1814
D1	Non-Allele Specific	2	Kcnq2	25.4448
D1	Non-Allele Specific	3	Gapdh	20.1444
D1	Non-Allele Specific	1	Kcnq2	25.4338
D1	Non-Allele Specific	2	Gapdh	20.0935
D1	Non-Allele Specific	3	Kcnq2	25.3963
D2	Non-Allele Specific	1	Gapdh	20.4415
D2	Non-Allele Specific	2	Kcnq2	25.6882
D2	Non-Allele Specific	3	Gapdh	20.4005
D2	Non-Allele Specific	1	Kcnq2	25.6113
D2	Non-Allele Specific	2	Gapdh	20.4222
D2	Non-Allele Specific	3	Kcnq2	25.6238
D3	Non-Allele Specific	1	Gapdh	20.2355
D3	Non-Allele Specific	2	Kcnq2	25.8324
D3	Non-Allele Specific	3	Gapdh	20.2343
D3	Non-Allele Specific	1	Kcnq2	25.7831
D3	Non-Allele Specific	2	Gapdh	20.1997
D3	Non-Allele Specific	3	Kcnq2	25.7282
D4	Non-Allele Specific	1	Gapdh	19.8687
D4	Non-Allele Specific	2	Kcnq2	25.3092
D4	Non-Allele Specific	3	Gapdh	19.9086
D4	Non-Allele Specific	1	Kcnq2	25.3933
D4	Non-Allele Specific	2	Gapdh	19.8018
D4	Non-Allele Specific	3	Kcnq2	25.2811
D5	Non-Allele Specific	1	Gapdh	20.3348
D5	Non-Allele Specific	2	Kcnq2	25.5694
D5	Non-Allele Specific	3	Gapdh	20.2906
D5	Non-Allele Specific	1	Kcnq2	25.5514
D5	Non-Allele Specific	2	Gapdh	20.2771
D5	Non-Allele Specific	3	Kcnq2	25.5145
D6	Non-Allele Specific	1	Gapdh	20.1491
D6	Non-Allele Specific	2	Kcnq2	25.1174
D6	Non-Allele Specific	3	Gapdh	20.1561
D6	Non-Allele Specific	1	Kcnq2	25.0907
D6	Non-Allele Specific	2	Gapdh	20.0684
D6	Non-Allele Specific	3	Kcnq2	25.0887
W1	WT Allele Specific	1	Gapdh	20.1667
W1	WT Allele Specific	2	Kcnq2	25.9654
W1	WT Allele Specific	3	Gapdh	20.66
W1	WT Allele Specific	1	Kcnq2	26.5071
W1	WT Allele Specific	2	Gapdh	20.0858
W1	WT Allele Specific	3	Kcnq2	25.9767
W2	WT Allele Specific	1	Gapdh	20.4002
W2	WT Allele Specific	2	Kcnq2	25.912
W2	WT Allele Specific	3	Gapdh	20.7369
W2	WT Allele Specific	1	Kcnq2	26.2313
W2	WT Allele Specific	2	Gapdh	20.2209
W2	WT Allele Specific	3	Kcnq2	25.7171
W3	WT Allele Specific	1	Gapdh	20.377
W3	WT Allele Specific	2	Kcnq2	25.6361
W3	WT Allele Specific	3	Gapdh	20.3326
W3	WT Allele Specific	1	Kcnq2	25.5795
W3	WT Allele Specific	2	Gapdh	20.1822
W3	WT Allele Specific	3	Kcnq2	25.4411
W4	WT Allele Specific	1	Gapdh	20.5358
W4	WT Allele Specific	2	Kcnq2	26.0038
W4	WT Allele Specific	3	Gapdh	20.5438
W4	WT Allele Specific	1	Kcnq2	25.9768
W4	WT Allele Specific	2	Gapdh	20.6224
W4	WT Allele Specific	3	Kcnq2	26.103
W5	WT Allele Specific	1	Gapdh	20.3969
W5	WT Allele Specific	2	Kcnq2	25.7446
W5	WT Allele Specific	3	Gapdh	20.4018
W5	WT Allele Specific	1	Kcnq2	25.7988
W5	WT Allele Specific	2	Gapdh	20.3102
W5	WT Allele Specific	3	Kcnq2	25.7669
W6	WT Allele Specific	1	Gapdh	20.5172
W6	WT Allele Specific	2	Kcnq2	25.9015
W6	WT Allele Specific	3	Gapdh	20.4546
W6	WT Allele Specific	1	Kcnq2	25.8972
W6	WT Allele Specific	2	Gapdh	20.4472
W6	WT Allele Specific	3	Kcnq2	25.8707
D1	WT Allele Specific	1	Gapdh	20.2902
D1	WT Allele Specific	2	Kcnq2	26.7418
D1	WT Allele Specific	3	Gapdh	20.2417
D1	WT Allele Specific	1	Kcnq2	26.7501
D1	WT Allele Specific	2	Gapdh	20.1497
D1	WT Allele Specific	3	Kcnq2	26.7025
D2	WT Allele Specific	1	Gapdh	20.5185
D2	WT Allele Specific	2	Kcnq2	26.9791
D2	WT Allele Specific	3	Gapdh	20.5054
D2	WT Allele Specific	1	Kcnq2	26.9327
D2	WT Allele Specific	2	Gapdh	20.4585
D2	WT Allele Specific	3	Kcnq2	26.906
D3	WT Allele Specific	1	Gapdh	20.2295
D3	WT Allele Specific	2	Kcnq2	26.9806
D3	WT Allele Specific	3	Gapdh	20.1906
D3	WT Allele Specific	1	Kcnq2	26.9828
D3	WT Allele Specific	2	Gapdh	20.2376
D3	WT Allele Specific	3	Kcnq2	27.0376
D4	WT Allele Specific	1	Gapdh	19.8063
D4	WT Allele Specific	2	Kcnq2	26.2711
D4	WT Allele Specific	3	Gapdh	20.0889
D4	WT Allele Specific	1	Kcnq2	26.6482
D4	WT Allele Specific	2	Gapdh	19.9801
D4	WT Allele Specific	3	Kcnq2	26.5016
D5	WT Allele Specific	1	Gapdh	20.3528
D5	WT Allele Specific	2	Kcnq2	26.7153
D5	WT Allele Specific	3	Gapdh	20.4763
D5	WT Allele Specific	1	Kcnq2	26.8789
D5	WT Allele Specific	2	Gapdh	20.1179
D5	WT Allele Specific	3	Kcnq2	26.4566
D6	WT Allele Specific	1	Gapdh	20.2014
D6	WT Allele Specific	2	Kcnq2	26.4317
D6	WT Allele Specific	3	Gapdh	20.3089
D6	WT Allele Specific	1	Kcnq2	26.4916
D6	WT Allele Specific	2	Gapdh	20.1488
D6	WT Allele Specific	3	Kcnq2	26.3636

## Sheet: P21 CTX Fold-change
Sample Name	Sex	Assay	Delta Ct		Animal ID	Sample Name	Genotype	Assay type	Sex	DeltaCt	Stdev Tech Reps	DeltaDeltaCT	Fold Change
W1	F	Non-Allele Specific	4.88682		A120.1-2	W1	WT	Non-Allele Specific	F	4.87171	0.015371	0.221565	0.857635
W1	F	Non-Allele Specific	4.87222		A120.1-4	W2	WT	Non-Allele Specific	F	4.74427	0.0601121	0.094129	0.936838
W1	F	Non-Allele Specific	4.85609		A120.3-11	W3	WT	Non-Allele Specific	F	4.28339	0.00463004	-0.366753	1.28945
W2	F	Non-Allele Specific	4.67486		A120.3-2	W4	WT	Non-Allele Specific	M	4.66505	0.0364497	0.0149073	0.98972
W2	F	Non-Allele Specific	4.77941		A120.3-4	W5	WT	Non-Allele Specific	M	4.70632	0.0175633	0.0561792	0.961808
W2	F	Non-Allele Specific	4.77855		A120.3-5	W6	WT	Non-Allele Specific	M	4.63012	0.0252318	-0.0200277	1.01398
W3	F	Non-Allele Specific	4.27805		D105.2-3	D1	E254fs/+	Non-Allele Specific	F	4.93063	0.0246162	0.280487	0.823313
W3	F	Non-Allele Specific	4.28606		D100.5-2	D2	E254fs/+	Non-Allele Specific	F	5.07489	0.0291206	0.424748	0.744969
W3	F	Non-Allele Specific	4.28607		D105.4-5	D3	E254fs/+	Non-Allele Specific	F	4.60939	0.0209793	-0.0407536	1.02865
W4	M	Non-Allele Specific	4.6654		D100.5-1	D4	E254fs/+	Non-Allele Specific	M	4.99993	0.0278925	0.349789	0.784699
W4	M	Non-Allele Specific	4.62843		D105.4-4	D5	E254fs/+	Non-Allele Specific	M	4.86875	0.0119187	0.218607	0.859395
W4	M	Non-Allele Specific	4.70133		D105.6-1	D6	E254fs/+	Non-Allele Specific	M	4.84565	0.0319598	0.195504	0.873268
W5	M	Non-Allele Specific	4.68652		A120.1-2	W1	WT	WT Allele Specific	F	5.33231	0.0333214	0.145339	0.904167
W5	M	Non-Allele Specific	4.72		A120.1-4	W2	WT	WT Allele Specific	F	5.262	0.0147584	0.0750282	0.949324
W5	M	Non-Allele Specific	4.71245		A120.3-11	W3	WT	WT Allele Specific	F	4.87593	0.036378	-0.311041	1.2406
W6	M	Non-Allele Specific	4.65129		A120.3-2	W4	WT	WT Allele Specific	M	5.29091	0.0364565	0.103944	0.930486
W6	M	Non-Allele Specific	4.63687		A120.3-4	W5	WT	WT Allele Specific	M	5.20734	0.0358255	0.0203738	0.985977
W6	M	Non-Allele Specific	4.6022		A120.3-5	W6	WT	WT Allele Specific	M	5.15332	0.027235	-0.0336443	1.02359
D1	M	Non-Allele Specific	4.93673		D105.2-3	D1	E254fs/+	WT Allele Specific	F	5.94849	0.0359111	0.761521	0.589874
D1	F	Non-Allele Specific	4.90354		D100.5-2	D2	E254fs/+	WT Allele Specific	F	6.1445	0.0129891	0.957532	0.514937
D1	F	Non-Allele Specific	4.95163		D105.4-5	D3	E254fs/+	WT Allele Specific	F	6.08162	0.0211912	0.894651	0.537877
D2	F	Non-Allele Specific	5.10631		D100.5-1	D4	E254fs/+	WT Allele Specific	M	6.15643	0.0349908	0.969463	0.510696
D2	F	Non-Allele Specific	5.0488		D105.4-4	D5	E254fs/+	WT Allele Specific	M	6.00131	0.0281108	0.814339	0.568669
D2	F	Non-Allele Specific	5.06957		D105.6-1	D6	E254fs/+	WT Allele Specific	M	5.93396	0.0245636	0.746995	0.595843
D3	F	Non-Allele Specific	4.63005
D3	F	Non-Allele Specific	4.5881
D3	F	Non-Allele Specific	4.61002
D4	F	Non-Allele Specific	5.02628
D4	M	Non-Allele Specific	5.0028
D4	M	Non-Allele Specific	4.97072
D5	M	Non-Allele Specific	4.87365
D5	M	Non-Allele Specific	4.87744
D5	M	Non-Allele Specific	4.85516
D6	M	Non-Allele Specific	4.88246
D6	M	Non-Allele Specific	4.82493
D6	M	Non-Allele Specific	4.82956
W1	F	WT Allele Specific	5.29896
W1	F	WT Allele Specific	5.3656
W1	F	WT Allele Specific	5.33236
W2	F	WT Allele Specific	5.26529
W2	F	WT Allele Specific	5.27483
W2	F	WT Allele Specific	5.24587
W3	F	WT Allele Specific	4.83668
W3	F	WT Allele Specific	4.8826
W3	F	WT Allele Specific	4.90851
W4	M	WT Allele Specific	5.33227
W4	M	WT Allele Specific	5.27705
W4	M	WT Allele Specific	5.26342
W5	M	WT Allele Specific	5.18179
W5	M	WT Allele Specific	5.19194
W5	M	WT Allele Specific	5.24829
W6	M	WT Allele Specific	5.17743
W6	M	WT Allele Specific	5.15875
W6	M	WT Allele Specific	5.12378
D1	M	WT Allele Specific	5.94004
D1	F	WT Allele Specific	5.91755
D1	F	WT Allele Specific	5.98787
D2	F	WT Allele Specific	6.12951
D2	F	WT Allele Specific	6.15154
D2	F	WT Allele Specific	6.15245
D3	F	WT Allele Specific	6.05723
D3	F	WT Allele Specific	6.09214
D3	F	WT Allele Specific	6.09549
D4	F	WT Allele Specific	6.12592
D4	M	WT Allele Specific	6.14875
D4	M	WT Allele Specific	6.19463
D5	M	WT Allele Specific	6.0337
D5	M	WT Allele Specific	5.98698
D5	M	WT Allele Specific	5.98325
D6	M	WT Allele Specific	5.92058
D6	M	WT Allele Specific	5.96231
D6	M	WT Allele Specific	5.919

## Sheet: P21 CTX CT Quality check
Animal	Assay	Technical replicate number	Target	Cycle threshold (CT)		Animal	Assay	Genotype	Average Kcnq2 CT	Average Gapdh CT	SD Kcnq2 CT	SD Gapdh CT		Genotype	Assay	Average Kcnq2 CT	SEM Kcnq2 CT
W1	Non-Allele Specific	1	Gapdh	19.9918		W1	Non-Allele Specific	WT	24.908	20.0363	0.0267397	0.0418409		WT	Non-Allele Specific	24.6528	0.184435
W1	Non-Allele Specific	2	Kcnq2	24.8786		W2	Non-Allele Specific	WT	24.0966	19.3523	0.19824	0.190918		E254fs/+	Non-Allele Specific	25.4318	0.245871
W1	Non-Allele Specific	3	Gapdh	20.0421		W3	Non-Allele Specific	WT	25.2957	21.0123	0.0792808	0.0773027		WT	WT Allele Specific	25.0502	0.207016
W1	Non-Allele Specific	1	Kcnq2	24.9143		W4	Non-Allele Specific	WT	24.8852	20.2202	0.098137	0.134146		E254fs/+	WT Allele Specific	26.558	0.27377
W1	Non-Allele Specific	2	Gapdh	20.0749		W5	Non-Allele Specific	WT	24.2826	19.5762	0.017218	0.0100332
W1	Non-Allele Specific	3	Kcnq2	24.931		W6	Non-Allele Specific	WT	24.4488	19.8187	0.0694697	0.0492259		Genotype	Assay	Average Gapdh CT	SEM Gapdh CT
W2	Non-Allele Specific	1	Gapdh	19.3613		D1	Non-Allele Specific	E254fs/+	25.1182	20.1875	0.0350052	0.054366		WT	Non-Allele Specific	20.0027	0.238497
W2	Non-Allele Specific	2	Kcnq2	24.0361		D2	Non-Allele Specific	E254fs/+	25.506	20.4311	0.0331468	0.0115314		E254fs/+	Non-Allele Specific	20.5436	0.257624
W2	Non-Allele Specific	3	Gapdh	19.5386		D3	Non-Allele Specific	E254fs/+	25.8645	21.2551	0.192573	0.200944		WT	WT Allele Specific	19.8632	0.230195
W2	Non-Allele Specific	1	Kcnq2	24.318		D4	Non-Allele Specific	E254fs/+	25.9467	20.9468	0.147585	0.119771		E254fs/+	WT Allele Specific	20.5136	0.243023
W2	Non-Allele Specific	2	Gapdh	19.1571		D5	Non-Allele Specific	E254fs/+	25.7871	20.9184	0.0714695	0.0629845
W2	Non-Allele Specific	3	Kcnq2	23.9357		D6	Non-Allele Specific	E254fs/+	24.3683	19.5226	0.148315	0.139872
W3	Non-Allele Specific	1	Gapdh	20.9762		W1	WT Allele Specific	WT	25.4727	20.1404	0.0267397	0.0418409
W3	Non-Allele Specific	2	Kcnq2	25.2543		W2	WT Allele Specific	WT	24.7554	19.4935	0.19824	0.190918
W3	Non-Allele Specific	3	Gapdh	21.1011		W3	WT Allele Specific	WT	25.5945	20.7186	0.0792808	0.0773027
W3	Non-Allele Specific	1	Kcnq2	25.3871		W4	WT Allele Specific	WT	25.443	20.1521	0.098137	0.134146
W3	Non-Allele Specific	2	Gapdh	20.9597		W5	WT Allele Specific	WT	24.481	19.2737	0.017218	0.0100332
W3	Non-Allele Specific	3	Kcnq2	25.2457		W6	WT Allele Specific	WT	24.5545	19.4011	0.0694697	0.0492259
W4	Non-Allele Specific	1	Gapdh	20.1983		D1	WT Allele Specific	E254fs/+	25.9494	20.0009	0.0350052	0.054366
W4	Non-Allele Specific	2	Kcnq2	24.8637		D2	WT Allele Specific	E254fs/+	26.7948	20.6503	0.0331468	0.0115314
W4	Non-Allele Specific	3	Gapdh	20.3639		D3	WT Allele Specific	E254fs/+	27.1026	21.021	0.192573	0.200944
W4	Non-Allele Specific	1	Kcnq2	24.9923		D4	WT Allele Specific	E254fs/+	27.0792	20.9228	0.147585	0.119771
W4	Non-Allele Specific	2	Gapdh	20.0983		D5	WT Allele Specific	E254fs/+	26.9226	20.9213	0.0714695	0.0629845
W4	Non-Allele Specific	3	Kcnq2	24.7996		D6	WT Allele Specific	E254fs/+	25.4993	19.5653	0.148315	0.139872
W5	Non-Allele Specific	1	Gapdh	19.5822
W5	Non-Allele Specific	2	Kcnq2	24.2687
W5	Non-Allele Specific	3	Gapdh	19.5818
W5	Non-Allele Specific	1	Kcnq2	24.3019
W5	Non-Allele Specific	2	Gapdh	19.5647
W5	Non-Allele Specific	3	Kcnq2	24.2771
W6	Non-Allele Specific	1	Gapdh	19.8755
W6	Non-Allele Specific	2	Kcnq2	24.5268
W6	Non-Allele Specific	3	Gapdh	19.7892
W6	Non-Allele Specific	1	Kcnq2	24.426
W6	Non-Allele Specific	2	Gapdh	19.7914
W6	Non-Allele Specific	3	Kcnq2	24.3936
D1	Non-Allele Specific	1	Gapdh	20.2057
D1	Non-Allele Specific	2	Kcnq2	25.1424
D1	Non-Allele Specific	3	Gapdh	20.2305
D1	Non-Allele Specific	1	Kcnq2	25.134
D1	Non-Allele Specific	2	Gapdh	20.1264
D1	Non-Allele Specific	3	Kcnq2	25.078
D2	Non-Allele Specific	1	Gapdh	20.4379
D2	Non-Allele Specific	2	Kcnq2	25.5442
D2	Non-Allele Specific	3	Gapdh	20.4375
D2	Non-Allele Specific	1	Kcnq2	25.4863
D2	Non-Allele Specific	2	Gapdh	20.4178
D2	Non-Allele Specific	3	Kcnq2	25.4873
D3	Non-Allele Specific	1	Gapdh	21.2761
D3	Non-Allele Specific	2	Kcnq2	25.9062
D3	Non-Allele Specific	3	Gapdh	21.4447
D3	Non-Allele Specific	1	Kcnq2	26.0328
D3	Non-Allele Specific	2	Gapdh	21.0445
D3	Non-Allele Specific	3	Kcnq2	25.6545
D4	Non-Allele Specific	1	Gapdh	21.0529
D4	Non-Allele Specific	2	Kcnq2	26.0791
D4	Non-Allele Specific	3	Gapdh	20.9705
D4	Non-Allele Specific	1	Kcnq2	25.9733
D4	Non-Allele Specific	2	Gapdh	20.8169
D4	Non-Allele Specific	3	Kcnq2	25.7876
D5	Non-Allele Specific	1	Gapdh	20.9864
D5	Non-Allele Specific	2	Kcnq2	25.86
D5	Non-Allele Specific	3	Gapdh	20.9068
D5	Non-Allele Specific	1	Kcnq2	25.7842
D5	Non-Allele Specific	2	Gapdh	20.862
D5	Non-Allele Specific	3	Kcnq2	25.7172
D6	Non-Allele Specific	1	Gapdh	19.5596
D6	Non-Allele Specific	2	Kcnq2	24.442
D6	Non-Allele Specific	3	Gapdh	19.6403
D6	Non-Allele Specific	1	Kcnq2	24.4652
D6	Non-Allele Specific	2	Gapdh	19.368
D6	Non-Allele Specific	3	Kcnq2	24.1975
W1	WT Allele Specific	1	Gapdh	20.1735
W1	WT Allele Specific	2	Kcnq2	25.4724
W1	WT Allele Specific	3	Gapdh	20.2806
W1	WT Allele Specific	1	Kcnq2	25.6462
W1	WT Allele Specific	2	Gapdh	19.9672
W1	WT Allele Specific	3	Kcnq2	25.2996
W2	WT Allele Specific	1	Gapdh	19.5691
W2	WT Allele Specific	2	Kcnq2	24.8344
W2	WT Allele Specific	3	Gapdh	19.5005
W2	WT Allele Specific	1	Kcnq2	24.7753
W2	WT Allele Specific	2	Gapdh	19.4107
W2	WT Allele Specific	3	Kcnq2	24.6566
W3	WT Allele Specific	1	Gapdh	20.8067
W3	WT Allele Specific	2	Kcnq2	25.6434
W3	WT Allele Specific	3	Gapdh	20.7281
W3	WT Allele Specific	1	Kcnq2	25.6107
W3	WT Allele Specific	2	Gapdh	20.6208
W3	WT Allele Specific	3	Kcnq2	25.5294
W4	WT Allele Specific	1	Gapdh	20.1653
W4	WT Allele Specific	2	Kcnq2	25.4975
W4	WT Allele Specific	3	Gapdh	20.1746
W4	WT Allele Specific	1	Kcnq2	25.4516
W4	WT Allele Specific	2	Gapdh	20.1165
W4	WT Allele Specific	3	Kcnq2	25.3799
W5	WT Allele Specific	1	Gapdh	19.3364
W5	WT Allele Specific	2	Kcnq2	24.5182
W5	WT Allele Specific	3	Gapdh	19.2346
W5	WT Allele Specific	1	Kcnq2	24.4266
W5	WT Allele Specific	2	Gapdh	19.25
W5	WT Allele Specific	3	Kcnq2	24.4983
W6	WT Allele Specific	1	Gapdh	19.419
W6	WT Allele Specific	2	Kcnq2	24.5965
W6	WT Allele Specific	3	Gapdh	19.4032
W6	WT Allele Specific	1	Kcnq2	24.5619
W6	WT Allele Specific	2	Gapdh	19.3812
W6	WT Allele Specific	3	Kcnq2	24.505
D1	WT Allele Specific	1	Gapdh	20.0311
D1	WT Allele Specific	2	Kcnq2	25.9712
D1	WT Allele Specific	3	Gapdh	19.9836
D1	WT Allele Specific	1	Kcnq2	25.9012
D1	WT Allele Specific	2	Gapdh	19.9881
D1	WT Allele Specific	3	Kcnq2	25.976
D2	WT Allele Specific	1	Gapdh	20.6036
D2	WT Allele Specific	2	Kcnq2	26.7331
D2	WT Allele Specific	3	Gapdh	20.7451
D2	WT Allele Specific	1	Kcnq2	26.8966
D2	WT Allele Specific	2	Gapdh	20.6022
D2	WT Allele Specific	3	Kcnq2	26.7546
D3	WT Allele Specific	1	Gapdh	21.0169
D3	WT Allele Specific	2	Kcnq2	27.0741
D3	WT Allele Specific	3	Gapdh	21.0073
D3	WT Allele Specific	1	Kcnq2	27.0995
D3	WT Allele Specific	2	Gapdh	21.0388
D3	WT Allele Specific	3	Kcnq2	27.1343
D4	WT Allele Specific	1	Gapdh	20.947
D4	WT Allele Specific	2	Kcnq2	27.073
D4	WT Allele Specific	3	Gapdh	20.9592
D4	WT Allele Specific	1	Kcnq2	27.1079
D4	WT Allele Specific	2	Gapdh	20.8622
D4	WT Allele Specific	3	Kcnq2	27.0569
D5	WT Allele Specific	1	Gapdh	20.908
D5	WT Allele Specific	2	Kcnq2	26.9417
D5	WT Allele Specific	3	Gapdh	20.9877
D5	WT Allele Specific	1	Kcnq2	26.9746
D5	WT Allele Specific	2	Gapdh	20.8681
D5	WT Allele Specific	3	Kcnq2	26.8514
D6	WT Allele Specific	1	Gapdh	19.6482
D6	WT Allele Specific	2	Kcnq2	25.5688
D6	WT Allele Specific	3	Gapdh	19.5714
D6	WT Allele Specific	1	Kcnq2	25.5338
D6	WT Allele Specific	2	Gapdh	19.4763
D6	WT Allele Specific	3	Kcnq2	25.3953

## Sheet: P100 HIP Fold-change
Sample Name	Sex	Assay	Delta Ct		Animal ID	Sample Name	Genotype	Assay type	Sex	DeltaCt	Stdev Tech Reps	DeltaDeltaCT	Fold Change
W1	F	Non-Allele Specific	4.83439		A120.1-2	W1	WT	Non-Allele Specific	F	4.85255	0.0214009	0.0181493	0.987499
W1	F	Non-Allele Specific	4.84711		A120.1-4	W2	WT	Non-Allele Specific	F	4.91671	0.0163568	0.0823118	0.944543
W1	F	Non-Allele Specific	4.87614		A120.3-11	W3	WT	Non-Allele Specific	F	4.89209	0.0128635	0.0576931	0.960799
W2	F	Non-Allele Specific	4.9214		A120.3-2	W4	WT	Non-Allele Specific	M	4.64994	0.0172421	-0.184458	1.13639
W2	F	Non-Allele Specific	4.93021		A120.3-4	W5	WT	Non-Allele Specific	M	4.80899	0.0181175	-0.0254095	1.01777
W2	F	Non-Allele Specific	4.89852		A120.3-5	W6	WT	Non-Allele Specific	M	4.88611	0.0342105	0.0517129	0.96479
W3	F	Non-Allele Specific	4.90459		D105.2-3	D1	E254fs/+	Non-Allele Specific	F	5.65904	0.00806424	0.82464	0.564623
W3	F	Non-Allele Specific	4.8928		D100.5-2	D2	E254fs/+	Non-Allele Specific	F	5.57145	0.0424833	0.737049	0.599965
W3	F	Non-Allele Specific	4.87889		D105.4-5	D3	E254fs/+	Non-Allele Specific	F	5.20406	0.00803087	0.369659	0.773965
W4	M	Non-Allele Specific	4.65749		D100.5-1	D4	E254fs/+	Non-Allele Specific	M	5.39484	0.00989997	0.560438	0.678096
W4	M	Non-Allele Specific	4.63021		D105.4-4	D5	E254fs/+	Non-Allele Specific	M	5.1498	0.0146133	0.315398	0.803629
W4	M	Non-Allele Specific	4.66212		D105.6-1	D6	E254fs/+	Non-Allele Specific	M	5.22906	0.0275553	0.394662	0.760667
W5	M	Non-Allele Specific	4.78847		A120.1-2	W1	WT	WT Allele Specific	F	5.51339	0.00522666	0.153774	0.898896
W5	M	Non-Allele Specific	4.81573		A120.1-4	W2	WT	WT Allele Specific	F	5.38651	0.0238816	0.0268974	0.981529
W5	M	Non-Allele Specific	4.82277		A120.3-11	W3	WT	WT Allele Specific	F	5.49528	0.0509282	0.135668	0.910248
W6	M	Non-Allele Specific	4.90357		A120.3-2	W4	WT	WT Allele Specific	M	5.19809	0.0255673	-0.161524	1.11847
W6	M	Non-Allele Specific	4.90807		A120.3-4	W5	WT	WT Allele Specific	M	5.28643	0.0304911	-0.0731888	1.05204
W6	M	Non-Allele Specific	4.84669		A120.3-5	W6	WT	WT Allele Specific	M	5.27799	0.0269506	-0.0816263	1.05821
D1	M	Non-Allele Specific	5.65135		D105.2-3	D1	E254fs/+	WT Allele Specific	F	6.61227	0.0505721	1.25265	0.419676
D1	F	Non-Allele Specific	5.65834		D100.5-2	D2	E254fs/+	WT Allele Specific	F	6.57581	0.00829365	1.21619	0.430417
D1	F	Non-Allele Specific	5.66743		D105.4-5	D3	E254fs/+	WT Allele Specific	F	5.7479	0.019505	0.388287	0.764036
D2	F	Non-Allele Specific	5.61718		D100.5-1	D4	E254fs/+	WT Allele Specific	M	6.39276	0.0272036	1.03315	0.488643
D2	F	Non-Allele Specific	5.56395		D105.4-4	D5	E254fs/+	WT Allele Specific	M	6.04645	0.0287691	0.686838	0.621214
D2	F	Non-Allele Specific	5.53321		D105.6-1	D6	E254fs/+	WT Allele Specific	M	6.33621	0.0110557	0.976591	0.508179
D3	F	Non-Allele Specific	5.20827
D3	F	Non-Allele Specific	5.2091
D3	F	Non-Allele Specific	5.1948
D4	F	Non-Allele Specific	5.38395
D4	M	Non-Allele Specific	5.39727
D4	M	Non-Allele Specific	5.40329
D5	M	Non-Allele Specific	5.13838
D5	M	Non-Allele Specific	5.16627
D5	M	Non-Allele Specific	5.14474
D6	M	Non-Allele Specific	5.20733
D6	M	Non-Allele Specific	5.2198
D6	M	Non-Allele Specific	5.26005
W1	F	WT Allele Specific	5.51172
W1	F	WT Allele Specific	5.5092
W1	F	WT Allele Specific	5.51925
W2	F	WT Allele Specific	5.40499
W2	F	WT Allele Specific	5.35955
W2	F	WT Allele Specific	5.395
W3	F	WT Allele Specific	5.4384
W3	F	WT Allele Specific	5.53664
W3	F	WT Allele Specific	5.51081
W4	M	WT Allele Specific	5.22727
W4	M	WT Allele Specific	5.1874
W4	M	WT Allele Specific	5.1796
W5	M	WT Allele Specific	5.27727
W5	M	WT Allele Specific	5.26157
W5	M	WT Allele Specific	5.32045
W6	M	WT Allele Specific	5.28108
W6	M	WT Allele Specific	5.24963
W6	M	WT Allele Specific	5.30326
D1	M	WT Allele Specific	6.56763
D1	F	WT Allele Specific	6.66719
D1	F	WT Allele Specific	6.60199
D2	F	WT Allele Specific	6.58154
D2	F	WT Allele Specific	6.5663
D2	F	WT Allele Specific	6.57958
D3	F	WT Allele Specific	5.77021
D3	F	WT Allele Specific	5.7394
D3	F	WT Allele Specific	5.73409
D4	F	WT Allele Specific	6.38172
D4	M	WT Allele Specific	6.42375
D4	M	WT Allele Specific	6.37282
D5	M	WT Allele Specific	6.03503
D5	M	WT Allele Specific	6.02515
D5	M	WT Allele Specific	6.07918
D6	M	WT Allele Specific	6.33386
D6	M	WT Allele Specific	6.32651
D6	M	WT Allele Specific	6.34825

## Sheet: P100 HIP CT Quality check
Animal	Assay	Technical replicate number	Target	Cycle threshold (CT)		Animal	Assay	Genotype	Average Kcnq2 CT	Average Gapdh CT	SD Kcnq2 CT	SD Gapdh CT		Genotype	Assay	Average Kcnq2 CT	SEM Kcnq2 CT
WF1	Non-Allele Specific	1	Gapdh	19.865		WF1	Non-Allele Specific	WT	24.7012	19.8486	0.0922318	0.10767		WT	Non-Allele Specific	24.6136	0.171532
WF1	Non-Allele Specific	2	Kcnq2	24.6994		WF2	Non-Allele Specific	WT	24.9574	20.0406	0.0963061	0.0800022		E254fs/+	Non-Allele Specific	25.1865	0.132803
WF1	Non-Allele Specific	3	Gapdh	19.9472		WF3	Non-Allele Specific	WT	25.0639	19.8598	0.0635502	0.0555689		WT	WT Allele Specific	25.2425	0.163713
WF1	Non-Allele Specific	1	Kcnq2	24.7943		WM1	Non-Allele Specific	WT	23.9418	19.2919	0.0203432	0.0347092		E254fs/+	WT Allele Specific	26.2429	0.192337
WF1	Non-Allele Specific	2	Gapdh	19.7337		WM2	Non-Allele Specific	WT	24.3077	19.4987	0.00509189	0.0224523
WF1	Non-Allele Specific	3	Kcnq2	24.6099		WM3	Non-Allele Specific	WT	24.71	19.8239	0.0822113	0.055752		Genotype	Assay	Average Gapdh CT	SEM Gapdh CT
WF2	Non-Allele Specific	1	Gapdh	20.0556		DF1	Non-Allele Specific	E254fs/+	25.1411	19.482	0.0131796	0.0210692		WT	Non-Allele Specific	19.7273	0.112785
WF2	Non-Allele Specific	2	Kcnq2	24.977		DF2	Non-Allele Specific	E254fs/+	25.3145	19.7431	0.0722358	0.0302395		E254fs/+	Non-Allele Specific	19.8704	0.141233
WF2	Non-Allele Specific	3	Gapdh	20.1121		DF3	Non-Allele Specific	E254fs/+	24.8759	19.9838	0.0655637	0.0527135		WT	WT Allele Specific	19.8408	0.0957465
WF2	Non-Allele Specific	1	Kcnq2	25.0423		DM1	Non-Allele Specific	E254fs/+	25.2456	19.8507	0.055098	0.0609291		E254fs/+	WT Allele Specific	19.9998	0.15755
WF2	Non-Allele Specific	2	Gapdh	19.9542		DM2	Non-Allele Specific	E254fs/+	24.8257	19.6759	0.0602333	0.0645918
WF2	Non-Allele Specific	3	Kcnq2	24.8527		DM3	Non-Allele Specific	E254fs/+	25.7161	20.4871	0.00770825	0.0232519
WF3	Non-Allele Specific	1	Gapdh	19.8955		WF1	WT Allele Specific	WT	25.4613	19.9479	0.0922318	0.10767
WF3	Non-Allele Specific	2	Kcnq2	25.1038		WF2	WT Allele Specific	WT	25.4718	20.0853	0.0963061	0.0800022
WF3	Non-Allele Specific	3	Gapdh	19.8881		WF3	WT Allele Specific	WT	25.7572	20.0093	0.0635502	0.0555689
WF3	Non-Allele Specific	1	Kcnq2	25.0972		WM1	WT Allele Specific	WT	24.6277	19.4296	0.0203432	0.0347092
WF3	Non-Allele Specific	2	Gapdh	19.7958		WM2	WT Allele Specific	WT	25.0598	19.7734	0.00509189	0.0224523
WF3	Non-Allele Specific	3	Kcnq2	24.9906		WM3	WT Allele Specific	WT	25.0775	19.7995	0.0822113	0.055752
WM1	Non-Allele Specific	1	Gapdh	19.2935		DF1	WT Allele Specific	E254fs/+	26.0808	19.4685	0.0131796	0.0210692
WM1	Non-Allele Specific	2	Kcnq2	23.951		DF2	WT Allele Specific	E254fs/+	26.3958	19.82	0.0722358	0.0302395
WM1	Non-Allele Specific	3	Gapdh	19.3258		DF3	WT Allele Specific	E254fs/+	25.641	20.1457	0.0655637	0.0527135
WM1	Non-Allele Specific	1	Kcnq2	23.956		DM1	WT Allele Specific	E254fs/+	26.5269	20.1341	0.055098	0.0609291
WM1	Non-Allele Specific	2	Gapdh	19.2564		DM2	WT Allele Specific	E254fs/+	25.8755	19.8291	0.0602333	0.0645918
WM1	Non-Allele Specific	3	Kcnq2	23.9185		DM3	WT Allele Specific	E254fs/+	26.9374	20.6012	0.00770825	0.0232519
WM2	Non-Allele Specific	1	Gapdh	19.5246
WM2	Non-Allele Specific	2	Kcnq2	24.3131
WM2	Non-Allele Specific	3	Gapdh	19.4872
WM2	Non-Allele Specific	1	Kcnq2	24.3029
WM2	Non-Allele Specific	2	Gapdh	19.4844
WM2	Non-Allele Specific	3	Kcnq2	24.3071
WM3	Non-Allele Specific	1	Gapdh	19.8862
WM3	Non-Allele Specific	2	Kcnq2	24.7898
WM3	Non-Allele Specific	3	Gapdh	19.8065
WM3	Non-Allele Specific	1	Kcnq2	24.7145
WM3	Non-Allele Specific	2	Gapdh	19.7789
WM3	Non-Allele Specific	3	Kcnq2	24.6256
DF1	Non-Allele Specific	1	Gapdh	19.4996
DF1	Non-Allele Specific	2	Kcnq2	25.151
DF1	Non-Allele Specific	3	Gapdh	19.4878
DF1	Non-Allele Specific	1	Kcnq2	25.1461
DF1	Non-Allele Specific	2	Gapdh	19.4587
DF1	Non-Allele Specific	3	Kcnq2	25.1261
DF2	Non-Allele Specific	1	Gapdh	19.7718
DF2	Non-Allele Specific	2	Kcnq2	25.389
DF2	Non-Allele Specific	3	Gapdh	19.7459
DF2	Non-Allele Specific	1	Kcnq2	25.3099
DF2	Non-Allele Specific	2	Gapdh	19.7115
DF2	Non-Allele Specific	3	Kcnq2	25.2447
DF3	Non-Allele Specific	1	Gapdh	20.0333
DF3	Non-Allele Specific	2	Kcnq2	24.9379
DF3	Non-Allele Specific	3	Gapdh	19.9898
DF3	Non-Allele Specific	1	Kcnq2	24.8826
DF3	Non-Allele Specific	2	Gapdh	19.9284
DF3	Non-Allele Specific	3	Kcnq2	24.8073
DM1	Non-Allele Specific	1	Gapdh	19.8773
DM1	Non-Allele Specific	2	Kcnq2	25.2613
DM1	Non-Allele Specific	3	Gapdh	19.8938
DM1	Non-Allele Specific	1	Kcnq2	25.2911
DM1	Non-Allele Specific	2	Gapdh	19.781
DM1	Non-Allele Specific	3	Kcnq2	25.1843
DM2	Non-Allele Specific	1	Gapdh	19.7465
DM2	Non-Allele Specific	2	Kcnq2	24.8848
DM2	Non-Allele Specific	3	Gapdh	19.6615
DM2	Non-Allele Specific	1	Kcnq2	24.8278
DM2	Non-Allele Specific	2	Gapdh	19.6197
DM2	Non-Allele Specific	3	Kcnq2	24.7644
DM3	Non-Allele Specific	1	Gapdh	20.5097
DM3	Non-Allele Specific	2	Kcnq2	25.7171
DM3	Non-Allele Specific	3	Gapdh	20.4882
DM3	Non-Allele Specific	1	Kcnq2	25.708
DM3	Non-Allele Specific	2	Gapdh	20.4633
DM3	Non-Allele Specific	3	Kcnq2	25.7233
WF1	WT Allele Specific	1	Gapdh	19.9725
WF1	WT Allele Specific	2	Kcnq2	25.4842
WF1	WT Allele Specific	3	Gapdh	19.9953
WF1	WT Allele Specific	1	Kcnq2	25.5045
WF1	WT Allele Specific	2	Gapdh	19.876
WF1	WT Allele Specific	3	Kcnq2	25.3952
WF2	WT Allele Specific	1	Gapdh	20.1102
WF2	WT Allele Specific	2	Kcnq2	25.5152
WF2	WT Allele Specific	3	Gapdh	20.1357
WF2	WT Allele Specific	1	Kcnq2	25.4953
WF2	WT Allele Specific	2	Gapdh	20.0099
WF2	WT Allele Specific	3	Kcnq2	25.4049
WF3	WT Allele Specific	1	Gapdh	20.0561
WF3	WT Allele Specific	2	Kcnq2	25.8264
WF3	WT Allele Specific	3	Gapdh	20.0054
WF3	WT Allele Specific	1	Kcnq2	25.7448
WF3	WT Allele Specific	2	Gapdh	19.9665
WF3	WT Allele Specific	3	Kcnq2	25.7005
WM1	WT Allele Specific	1	Gapdh	19.4484
WM1	WT Allele Specific	2	Kcnq2	24.6757
WM1	WT Allele Specific	3	Gapdh	19.3947
WM1	WT Allele Specific	1	Kcnq2	24.5821
WM1	WT Allele Specific	2	Gapdh	19.4455
WM1	WT Allele Specific	3	Kcnq2	24.6251
WM2	WT Allele Specific	1	Gapdh	19.8185
WM2	WT Allele Specific	2	Kcnq2	25.0958
WM2	WT Allele Specific	3	Gapdh	19.7924
WM2	WT Allele Specific	1	Kcnq2	25.0539
WM2	WT Allele Specific	2	Gapdh	19.7092
WM2	WT Allele Specific	3	Kcnq2	25.0296
WM3	WT Allele Specific	1	Gapdh	19.829
WM3	WT Allele Specific	2	Kcnq2	25.11
WM3	WT Allele Specific	3	Gapdh	19.8222
WM3	WT Allele Specific	1	Kcnq2	25.0719
WM3	WT Allele Specific	2	Gapdh	19.7472
WM3	WT Allele Specific	3	Kcnq2	25.0505
DF1	WT Allele Specific	1	Gapdh	19.5599
DF1	WT Allele Specific	2	Kcnq2	26.1275
DF1	WT Allele Specific	3	Gapdh	19.4487
DF1	WT Allele Specific	1	Kcnq2	26.1158
DF1	WT Allele Specific	2	Gapdh	19.397
DF1	WT Allele Specific	3	Kcnq2	25.999
DF2	WT Allele Specific	1	Gapdh	19.8431
DF2	WT Allele Specific	2	Kcnq2	26.4246
DF2	WT Allele Specific	3	Gapdh	19.8384
DF2	WT Allele Specific	1	Kcnq2	26.4047
DF2	WT Allele Specific	2	Gapdh	19.7786
DF2	WT Allele Specific	3	Kcnq2	26.3581
DF3	WT Allele Specific	1	Gapdh	20.1063
DF3	WT Allele Specific	2	Kcnq2	25.5447
DF3	WT Allele Specific	3	Gapdh	20.2922
DF3	WT Allele Specific	1	Kcnq2	25.8289
DF3	WT Allele Specific	2	Gapdh	20.0386
DF3	WT Allele Specific	3	Kcnq2	25.5494
DM1	WT Allele Specific	1	Gapdh	20.1412
DM1	WT Allele Specific	2	Kcnq2	26.5229
DM1	WT Allele Specific	3	Gapdh	20.1257
DM1	WT Allele Specific	1	Kcnq2	26.5495
DM1	WT Allele Specific	2	Gapdh	20.1354
DM1	WT Allele Specific	3	Kcnq2	26.5082
DM2	WT Allele Specific	1	Gapdh	19.8321
DM2	WT Allele Specific	2	Kcnq2	25.8672
DM2	WT Allele Specific	3	Gapdh	19.8878
DM2	WT Allele Specific	1	Kcnq2	25.9129
DM2	WT Allele Specific	2	Gapdh	19.7674
DM2	WT Allele Specific	3	Kcnq2	25.8465
DM3	WT Allele Specific	1	Gapdh	20.5903
DM3	WT Allele Specific	2	Kcnq2	26.9241
DM3	WT Allele Specific	3	Gapdh	20.655
DM3	WT Allele Specific	1	Kcnq2	26.9815
DM3	WT Allele Specific	2	Gapdh	20.5582
DM3	WT Allele Specific	3	Kcnq2	26.9065

## Sheet: P100 CTX Fold-change
Sample Name	Sex	Assay	Delta Ct		Animal ID	Sample Name	Genotype	Assay type	Sex	DeltaCt	Stdev Tech Reps	DeltaDeltaCT	Fold Change
W1	F	Non-Allele Specific	3.99076		A120.1-2	W1	WT	Non-Allele Specific	F	3.99741	0.0150532	0.129468	0.914168
W1	F	Non-Allele Specific	4.01464		A120.1-4	W2	WT	Non-Allele Specific	F	3.9568	0.0160721	0.0888531	0.94027
W1	F	Non-Allele Specific	3.98683		A120.3-11	W3	WT	Non-Allele Specific	F	3.74001	0.00761978	-0.127936	1.09273
W2	F	Non-Allele Specific	3.93996		A120.3-2	W4	WT	Non-Allele Specific	M	3.82933	0.0178045	-0.0386137	1.02713
W2	F	Non-Allele Specific	3.95845		A120.3-4	W5	WT	Non-Allele Specific	M	3.8277	0.0139624	-0.0402394	1.02828
W2	F	Non-Allele Specific	3.97198		A120.3-5	W6	WT	Non-Allele Specific	M	3.85641	0.0181203	-0.0115319	1.00803
W3	F	Non-Allele Specific	3.73171		D105.2-3	D1	E254fs/+	Non-Allele Specific	F	4.46211	0.0258638	0.594165	0.662428
W3	F	Non-Allele Specific	3.74163		D100.5-2	D2	E254fs/+	Non-Allele Specific	F	4.42903	0.00100371	0.561091	0.677789
W3	F	Non-Allele Specific	3.74669		D105.4-5	D3	E254fs/+	Non-Allele Specific	F	3.85743	0.0264112	-0.0105147	1.00731
W4	M	Non-Allele Specific	3.83184		D100.5-1	D4	E254fs/+	Non-Allele Specific	M	4.23359	0.00877443	0.365652	0.776118
W4	M	Non-Allele Specific	3.8104		D105.4-4	D5	E254fs/+	Non-Allele Specific	M	4.14915	0.0153818	0.281202	0.822905
W4	M	Non-Allele Specific	3.84575		D105.6-1	D6	E254fs/+	Non-Allele Specific	M	4.26663	0.0191887	0.398685	0.75855
W5	M	Non-Allele Specific	3.82139		A120.1-2	W1	WT	WT Allele Specific	F	4.53334	0.0481317	0.0824086	0.94448
W5	M	Non-Allele Specific	3.84371		A120.1-4	W2	WT	WT Allele Specific	F	4.43625	0.017084	-0.0146812	1.01023
W5	M	Non-Allele Specific	3.81802		A120.3-11	W3	WT	WT Allele Specific	F	4.39413	0.0200197	-0.0568018	1.04016
W6	M	Non-Allele Specific	3.86721		A120.3-2	W4	WT	WT Allele Specific	M	4.52831	0.011093	0.077377	0.947779
W6	M	Non-Allele Specific	3.86653		A120.3-4	W5	WT	WT Allele Specific	M	4.41753	0.0329145	-0.0334088	1.02343
W6	M	Non-Allele Specific	3.83549		A120.3-5	W6	WT	WT Allele Specific	M	4.39604	0.023663	-0.0548938	1.03878
D1	M	Non-Allele Specific	4.48465		D105.2-3	D1	E254fs/+	WT Allele Specific	F	5.46639	0.0186341	1.01546	0.494671
D1	F	Non-Allele Specific	4.4678		D100.5-2	D2	E254fs/+	WT Allele Specific	F	5.46507	0.00995816	1.01414	0.495124
D1	F	Non-Allele Specific	4.43387		D105.4-5	D3	E254fs/+	WT Allele Specific	F	5.5365	0.0507713	1.08556	0.471209
D2	F	Non-Allele Specific	4.43013		D100.5-1	D4	E254fs/+	WT Allele Specific	M	5.29878	0.0175752	0.847849	0.555612
D2	F	Non-Allele Specific	4.42882		D105.4-4	D5	E254fs/+	WT Allele Specific	M	5.21801	0.0232962	0.767073	0.587608
D2	F	Non-Allele Specific	4.42816		D105.6-1	D6	E254fs/+	WT Allele Specific	M	5.411	0.0171761	0.960063	0.514034
D3	F	Non-Allele Specific	3.86536
D3	F	Non-Allele Specific	3.87897
D3	F	Non-Allele Specific	3.82796
D4	F	Non-Allele Specific	4.23865
D4	M	Non-Allele Specific	4.22346
D4	M	Non-Allele Specific	4.23867
D5	M	Non-Allele Specific	4.16175
D5	M	Non-Allele Specific	4.15367
D5	M	Non-Allele Specific	4.13201
D6	M	Non-Allele Specific	4.24582
D6	M	Non-Allele Specific	4.28362
D6	M	Non-Allele Specific	4.27044
W1	F	WT Allele Specific	4.49
W1	F	WT Allele Specific	4.52489
W1	F	WT Allele Specific	4.58514
W2	F	WT Allele Specific	4.41957
W2	F	WT Allele Specific	4.43548
W2	F	WT Allele Specific	4.45371
W3	F	WT Allele Specific	4.40799
W3	F	WT Allele Specific	4.37118
W3	F	WT Allele Specific	4.40323
W4	M	WT Allele Specific	4.54059
W4	M	WT Allele Specific	4.51901
W4	M	WT Allele Specific	4.52534
W5	M	WT Allele Specific	4.39697
W5	M	WT Allele Specific	4.40012
W5	M	WT Allele Specific	4.45549
W6	M	WT Allele Specific	4.41011
W6	M	WT Allele Specific	4.36872
W6	M	WT Allele Specific	4.40929
D1	M	WT Allele Specific	5.45566
D1	F	WT Allele Specific	5.45561
D1	F	WT Allele Specific	5.48791
D2	F	WT Allele Specific	5.4761
D2	F	WT Allele Specific	5.45674
D2	F	WT Allele Specific	5.46238
D3	F	WT Allele Specific	5.50823
D3	F	WT Allele Specific	5.59511
D3	F	WT Allele Specific	5.50615
D4	F	WT Allele Specific	5.31605
D4	M	WT Allele Specific	5.29938
D4	M	WT Allele Specific	5.28092
D5	M	WT Allele Specific	5.24337
D5	M	WT Allele Specific	5.21309
D5	M	WT Allele Specific	5.19756
D6	M	WT Allele Specific	5.41637
D6	M	WT Allele Specific	5.42484
D6	M	WT Allele Specific	5.39178

## Sheet: P100 CTX CT Quality check
Animal	Assay	Technical replicate number	Target	Cycle threshold (CT)		Animal	Assay	Genotype	Average Kcnq2 CT	Average Gapdh CT	SD Kcnq2 CT	SD Gapdh CT		Genotype	Assay	Average Kcnq2 CT	SEM Kcnq2 CT
WF1	Non-Allele Specific	1	Gapdh	20.7198		WF1	Non-Allele Specific	WT	24.7262	20.7288	0.131081	0.116735		WT	Non-Allele Specific	24.338	0.144564
WF1	Non-Allele Specific	2	Kcnq2	24.7106		WF2	Non-Allele Specific	WT	24.0081	20.0513	0.028392	0.037295		E254fs/+	Non-Allele Specific	24.3267	0.113282
WF1	Non-Allele Specific	3	Gapdh	20.8497		WF3	Non-Allele Specific	WT	24.7252	20.9852	0.0185131	0.0260641		WT	WT Allele Specific	24.9711	0.103291
WF1	Non-Allele Specific	1	Kcnq2	24.8643		WM1	Non-Allele Specific	WT	24.2821	20.4527	0.0575582	0.0525418		E254fs/+	WT Allele Specific	25.6462	0.076976
WF1	Non-Allele Specific	2	Gapdh	20.6167		WM2	Non-Allele Specific	WT	24.4062	20.5785	0.0395204	0.033975
WF1	Non-Allele Specific	3	Kcnq2	24.6036		WM3	Non-Allele Specific	WT	23.88	20.0236	0.0545092	0.0389363		Genotype	Assay	Average Gapdh CT	SEM Gapdh CT
WF2	Non-Allele Specific	1	Gapdh	20.0659		DF1	Non-Allele Specific	E254fs/+	24.3904	19.9282	0.101088	0.07546		WT	Non-Allele Specific	20.47	0.154815
WF2	Non-Allele Specific	2	Kcnq2	24.0059		DF2	Non-Allele Specific	E254fs/+	24.7829	20.3539	0.164762	0.164719		E254fs/+	Non-Allele Specific	20.0937	0.0581097
WF2	Non-Allele Specific	3	Gapdh	20.0791		DF3	Non-Allele Specific	E254fs/+	23.9348	20.0774	0.0714655	0.0806452		WT	WT Allele Specific	20.5201	0.0950173
WF2	Non-Allele Specific	1	Kcnq2	24.0376		DM1	Non-Allele Specific	E254fs/+	24.256	20.0224	0.149814	0.144023		E254fs/+	WT Allele Specific	20.2469	0.0708719
WF2	Non-Allele Specific	2	Gapdh	20.0089		DM2	Non-Allele Specific	E254fs/+	24.2188	20.0696	0.0869821	0.0724415
WF2	Non-Allele Specific	3	Kcnq2	23.9809		DM3	Non-Allele Specific	E254fs/+	24.3774	20.1108	0.217161	0.199631
WF3	Non-Allele Specific	1	Gapdh	21.0146		WF1	WT Allele Specific	WT	25.3343	20.801	0.131081	0.116735
WF3	Non-Allele Specific	2	Kcnq2	24.7463		WF2	WT Allele Specific	WT	24.7296	20.2934	0.028392	0.037295
WF3	Non-Allele Specific	3	Gapdh	20.9764		WF3	WT Allele Specific	WT	25.1962	20.802	0.0185131	0.0260641
WF3	Non-Allele Specific	1	Kcnq2	24.718		WM1	WT Allele Specific	WT	24.94	20.4117	0.0575582	0.0525418
WF3	Non-Allele Specific	2	Gapdh	20.9648		WM2	WT Allele Specific	WT	24.9322	20.5147	0.0395204	0.033975
WF3	Non-Allele Specific	3	Kcnq2	24.7114		WM3	WT Allele Specific	WT	24.6941	20.2981	0.0545092	0.0389363
WM1	Non-Allele Specific	1	Gapdh	20.5134		DF1	WT Allele Specific	E254fs/+	25.6335	20.1671	0.101088	0.07546
WM1	Non-Allele Specific	2	Kcnq2	24.3452		DF2	WT Allele Specific	E254fs/+	26.0204	20.5553	0.164762	0.164719
WM1	Non-Allele Specific	3	Gapdh	20.4222		DF3	WT Allele Specific	E254fs/+	25.5813	20.0448	0.0714655	0.0806452
WM1	Non-Allele Specific	1	Kcnq2	24.2326		DM1	WT Allele Specific	E254fs/+	25.5711	20.2723	0.149814	0.144023
WM1	Non-Allele Specific	2	Gapdh	20.4226		DM2	WT Allele Specific	E254fs/+	25.4954	20.2774	0.0869821	0.0724415
WM1	Non-Allele Specific	3	Kcnq2	24.2683		DM3	WT Allele Specific	E254fs/+	25.5755	20.1645	0.217161	0.199631
WM2	Non-Allele Specific	1	Gapdh	20.6102
WM2	Non-Allele Specific	2	Kcnq2	24.4316
WM2	Non-Allele Specific	3	Gapdh	20.5826
WM2	Non-Allele Specific	1	Kcnq2	24.4263
WM2	Non-Allele Specific	2	Gapdh	20.5426
WM2	Non-Allele Specific	3	Kcnq2	24.3606
WM3	Non-Allele Specific	1	Gapdh	20.0653
WM3	Non-Allele Specific	2	Kcnq2	23.9325
WM3	Non-Allele Specific	3	Gapdh	20.0173
WM3	Non-Allele Specific	1	Kcnq2	23.8838
WM3	Non-Allele Specific	2	Gapdh	19.9882
WM3	Non-Allele Specific	3	Kcnq2	23.8237
DF1	Non-Allele Specific	1	Gapdh	19.9843
DF1	Non-Allele Specific	2	Kcnq2	24.469
DF1	Non-Allele Specific	3	Gapdh	19.958
DF1	Non-Allele Specific	1	Kcnq2	24.4258
DF1	Non-Allele Specific	2	Gapdh	19.8424
DF1	Non-Allele Specific	3	Kcnq2	24.2763
DF2	Non-Allele Specific	1	Gapdh	20.2984
DF2	Non-Allele Specific	2	Kcnq2	24.7285
DF2	Non-Allele Specific	3	Gapdh	20.5392
DF2	Non-Allele Specific	1	Kcnq2	24.968
DF2	Non-Allele Specific	2	Gapdh	20.2241
DF2	Non-Allele Specific	3	Kcnq2	24.6523
DF3	Non-Allele Specific	1	Gapdh	19.9872
DF3	Non-Allele Specific	2	Kcnq2	23.8526
DF3	Non-Allele Specific	3	Gapdh	20.1025
DF3	Non-Allele Specific	1	Kcnq2	23.9815
DF3	Non-Allele Specific	2	Gapdh	20.1425
DF3	Non-Allele Specific	3	Kcnq2	23.9705
DM1	Non-Allele Specific	1	Gapdh	20.1861
DM1	Non-Allele Specific	2	Kcnq2	24.4248
DM1	Non-Allele Specific	3	Gapdh	19.9154
DM1	Non-Allele Specific	1	Kcnq2	24.1388
DM1	Non-Allele Specific	2	Gapdh	19.9656
DM1	Non-Allele Specific	3	Kcnq2	24.2043
DM2	Non-Allele Specific	1	Gapdh	20.1041
DM2	Non-Allele Specific	2	Kcnq2	24.2658
DM2	Non-Allele Specific	3	Gapdh	20.1184
DM2	Non-Allele Specific	1	Kcnq2	24.2721
DM2	Non-Allele Specific	2	Gapdh	19.9864
DM2	Non-Allele Specific	3	Kcnq2	24.1184
DM3	Non-Allele Specific	1	Gapdh	19.9483
DM3	Non-Allele Specific	2	Kcnq2	24.1941
DM3	Non-Allele Specific	3	Gapdh	20.3336
DM3	Non-Allele Specific	1	Kcnq2	24.6173
DM3	Non-Allele Specific	2	Gapdh	20.0505
DM3	Non-Allele Specific	3	Kcnq2	24.3209
WF1	WT Allele Specific	1	Gapdh	20.8175
WF1	WT Allele Specific	2	Kcnq2	25.3075
WF1	WT Allele Specific	3	Gapdh	20.8383
WF1	WT Allele Specific	1	Kcnq2	25.3632
WF1	WT Allele Specific	2	Gapdh	20.7471
WF1	WT Allele Specific	3	Kcnq2	25.3322
WF2	WT Allele Specific	1	Gapdh	20.3575
WF2	WT Allele Specific	2	Kcnq2	24.7771
WF2	WT Allele Specific	3	Gapdh	20.3882
WF2	WT Allele Specific	1	Kcnq2	24.8237
WF2	WT Allele Specific	2	Gapdh	20.1344
WF2	WT Allele Specific	3	Kcnq2	24.5881
WF3	WT Allele Specific	1	Gapdh	21.0002
WF3	WT Allele Specific	2	Kcnq2	25.4082
WF3	WT Allele Specific	3	Gapdh	20.5787
WF3	WT Allele Specific	1	Kcnq2	24.9499
WF3	WT Allele Specific	2	Gapdh	20.8272
WF3	WT Allele Specific	3	Kcnq2	25.2304
WM1	WT Allele Specific	1	Gapdh	20.4312
WM1	WT Allele Specific	2	Kcnq2	24.9718
WM1	WT Allele Specific	3	Gapdh	20.4044
WM1	WT Allele Specific	1	Kcnq2	24.9234
WM1	WT Allele Specific	2	Gapdh	20.3994
WM1	WT Allele Specific	3	Kcnq2	24.9247
WM2	WT Allele Specific	1	Gapdh	20.5071
WM2	WT Allele Specific	2	Kcnq2	24.9041
WM2	WT Allele Specific	3	Gapdh	20.5708
WM2	WT Allele Specific	1	Kcnq2	24.9709
WM2	WT Allele Specific	2	Gapdh	20.4661
WM2	WT Allele Specific	3	Kcnq2	24.9215
WM3	WT Allele Specific	1	Gapdh	20.3285
WM3	WT Allele Specific	2	Kcnq2	24.7386
WM3	WT Allele Specific	3	Gapdh	20.3375
WM3	WT Allele Specific	1	Kcnq2	24.7063
WM3	WT Allele Specific	2	Gapdh	20.2282
WM3	WT Allele Specific	3	Kcnq2	24.6375
DF1	WT Allele Specific	1	Gapdh	20.2585
DF1	WT Allele Specific	2	Kcnq2	25.7142
DF1	WT Allele Specific	3	Gapdh	20.2082
DF1	WT Allele Specific	1	Kcnq2	25.6638
DF1	WT Allele Specific	2	Gapdh	20.0345
DF1	WT Allele Specific	3	Kcnq2	25.5224
DF2	WT Allele Specific	1	Gapdh	20.5549
DF2	WT Allele Specific	2	Kcnq2	26.031
DF2	WT Allele Specific	3	Gapdh	20.6044
DF2	WT Allele Specific	1	Kcnq2	26.0611
DF2	WT Allele Specific	2	Gapdh	20.5066
DF2	WT Allele Specific	3	Kcnq2	25.969
DF3	WT Allele Specific	1	Gapdh	20.1348
DF3	WT Allele Specific	2	Kcnq2	25.643
DF3	WT Allele Specific	3	Gapdh	20.0256
DF3	WT Allele Specific	1	Kcnq2	25.6207
DF3	WT Allele Specific	2	Gapdh	19.974
DF3	WT Allele Specific	3	Kcnq2	25.4801
DM1	WT Allele Specific	1	Gapdh	20.3059
DM1	WT Allele Specific	2	Kcnq2	25.622
DM1	WT Allele Specific	3	Gapdh	20.4119
DM1	WT Allele Specific	1	Kcnq2	25.7112
DM1	WT Allele Specific	2	Gapdh	20.0991
DM1	WT Allele Specific	3	Kcnq2	25.38
DM2	WT Allele Specific	1	Gapdh	20.3332
DM2	WT Allele Specific	2	Kcnq2	25.5766
DM2	WT Allele Specific	3	Gapdh	20.431
DM2	WT Allele Specific	1	Kcnq2	25.6441
DM2	WT Allele Specific	2	Gapdh	20.0679
DM2	WT Allele Specific	3	Kcnq2	25.2655
DM3	WT Allele Specific	1	Gapdh	20.1663
DM3	WT Allele Specific	2	Kcnq2	25.5826
DM3	WT Allele Specific	3	Gapdh	20.1813
DM3	WT Allele Specific	1	Kcnq2	25.6062
DM3	WT Allele Specific	2	Gapdh	20.146
DM3	WT Allele Specific	3	Kcnq2	25.5378
