# Supplementary material for: Plural molecular and cellular mechanisms of pore domain KCNQ2 encephalopathy
Source: eLife. 2025 Jan 6;13:RP91204. doi: 10.7554/eLife.91204 (PMC11703504; doi:10.7554/eLife.91204)
Supplement: Figure 8—figure supplement 1—source data 1. [file elife-91204-fig8-figsupp1-data1.xlsx]

## Sheet: Sheet1
File name	Animal #	Genotype	Colabel	Interneuron #	Location	Somatic KCNQ2 labeling?	Somatic KCNQ3 labeling?	AIS KCNQ2 labeling?	AIS KCNQ3 labeling?		Genotype	Image stacks per genotype	Animals per genotype	Total # of interneurons	# of interneurons with somatic KCNQ2 labeling	# of interneurons with somatic KCNQ3 labeling	# of interneurons with AIS KCNQ2 labeling	# of interneurons with AIS KCNQ3 labeling
20221024 SL15 CA1 B 20x 2z	5	WT	AnkG	1	SR	No	No	No	No		WT	6	3	19	0	0	2	2
		WT	AnkG	2	SR	No	No	No	No		G256W/+	6	3	11	11	1	4	3
		WT	AnkG	3	SR	No	No	No	No
		WT	AnkG	4	SO	No	No	No	No
20221024 SL19 CA1 B 20x 2.5z	1	G256W/+	AnkG	0	NA	NA	NA	NA	NA
20230206 SL45 CA1 B 20x 2z	6	WT	AnkG	1	SR	No	No	No	No
		WT	AnkG	2	SR	No	No	No	No
		WT	AnkG	3	SR	No	No	No	No
20230206 SL49 CA1 B 20x 2z	4	G256W/+	AnkG	1	SR	Yes	No	Yes	Yes
		G256W/+	AnkG	2	CA1 PCL	Yes	No	No	No
		G256W/+	AnkG	3	SO	Yes	No	No	No
		G256W/+	AnkG	4	SO	Yes	No	No	No
		G256W/+	AnkG	5	SO	Yes	Yes	Yes	Yes
20230201 SL39 CA1 B 20x 2z	6	WT	AnkG	1	SR	No	No	No	No
		WT	AnkG	2	SR	No	No	No	No
		WT	AnkG	3	SR	No	No	Yes	Yes
20230201 SL43 CA1 B 20x 2z	2	G256W/+	AnkG	1	SR	Yes	No	No	No
		G256W/+	AnkG	2	SO	Yes	No	No	No
20230120 SL31 CA1 B 20x 2z	13	WT	AnkG	1	SR	No	No	No	No
		WT	AnkG	2	SO	No	No	No	No
		WT	AnkG	3	SO	No	No	No	No
		WT	AnkG	4	SO	No	No	No	No
		WT	AnkG	5	SO	No	No	No	No
20230120 SL35 CA1 B 20x 2z	1	G256W/+	AnkG	1	SO	Yes	No	No	No
20221031 SL16 CA1 B 20x 2z	5	WT	PanNav	1	SR	No	No	No	No
20221031 SL20 CA1 B 20x 2z	1	G256W/+	PanNav	1	SO	Yes	No	No	No
20221129 SL24 CA1 B 20x 2z	5	WT	PanNav	1	SR	No	No	No	No
		WT	PanNav	2	SR	No	No	Yes	Yes
		WT	PanNav	3	SR	No	No	No	No
20230206 SL50 CA1 B 20x 2z	4	G256W/+	PanNav	1	SR	Yes	No	Yes	No
		G256W/+	PanNav	2	SO	Yes	No	Yes	Yes
