# Supplementary material for: Plural molecular and cellular mechanisms of pore domain KCNQ2 encephalopathy
Source: eLife. 2025 Jan 6;13:RP91204. doi: 10.7554/eLife.91204 (PMC11703504; doi:10.7554/eLife.91204)
Supplement: Figure 8—source data 1. [file elife-91204-fig8-data1.xlsx]

## Sheet: Homepage
Marker	Region	Genotype	Value	Normalized
Q2	CA1 B	WT	1.63069	1
		E254VFs/+	1.44754	0.887684
		G256W/+	1.10635	0.678455
	CA3 A MF	WT	1.52712	1
		E254VFs/+	1.24463	0.815016
		G256W/+	0.805804	0.527663
	CA3 A AIS	WT	1.21766	1
		E254VFs/+	1.21068	0.994263
		G256W/+	0.934661	0.767586
	DG	WT	2.41916	1
		E254VFs/+	2.30584	0.953158
		G256W/+	1.63435	0.675585
Q3	CA1 B	WT	2.18307	1
		E254VFs/+	1.70878	0.78274
		G256W/+	1.28381	0.588076
	CA3 A MF	WT	1.84088	1
		E254VFs/+	1.54283	0.838091
		G256W/+	1.10922	0.60255
	CA3 A AIS	WT	1.31568	1
		E254VFs/+	1.35266	1.02811
		G256W/+	1.04814	0.796657
	DG	WT	2.14362	1
		E254VFs/+	2.02876	0.946414
		G256W/+	1.52454	0.7112
PanNa-V	CA1 B	WT	1.65104	1
		E254VFs/+	1.80134	1.09103
		G256W/+	1.59323	0.964987
	CA3 A MF	WT	1.32157	1
		E254VFs/+	1.27658	0.965955
		G256W/+	1.23587	0.935154
	CA3 A AIS	WT	1.33693	1
		E254VFs/+	1.36156	1.01842
		G256W/+	1.30795	0.978321
	DG	WT	1.14364	1
		E254VFs/+	1.08317	0.947123
		G256W/+	1.00082	0.875119
DAPI	CA1 B	WT	0.704299	1
		E254VFs/+	0.7401	1.05083
		G256W/+	0.713706	1.01336
	CA3 A MF	WT	0.508936	1
		E254VFs/+	0.572568	1.12503
		G256W/+	0.512313	1.00664
	CA3 A AIS	WT	0.759512	1
		E254VFs/+	0.758711	0.998945
		G256W/+	0.776636	1.02255
	DG	WT	0.339837	1
		E254VFs/+	0.334144	0.983248
		G256W/+	0.360941	1.0621

## Sheet: Q2
WT											254											256
Image Details				Adjusted Ratio Method							Image Details				Adjusted Ratio Method							Image Details				Adjusted Ratio Method
Slide #	Animal #	Region	ROI #	Mean AIS/Mean Soma	AIS/Soma	Mean (AIS/Soma)					Slide #	Animal #	Region	ROI #	Mean AIS/Mean Soma	AIS/Soma	Mean (AIS/Soma)					Slide #	Animal #	Region	ROI #	Mean AIS/Mean Soma	AIS/Soma	Mean (AIS/Soma)
16	5	CA1 B	1	1.6443	1.38653	1.66388	1.66388	1.41773	1.63069		18	16	CA1 B	1	1.29496	1.18308	1.2977	1.2977	1.6037	1.44754		20	1	CA1 B	1	1.05891	1.16394	1.0599	1.0599	1.15898	1.10635
16	5	CA1 B	2		2.3813						18	16	CA1 B	2		1.24122						20	1	CA1 B	2		1.07032
16	5	CA1 B	3		1.72784						18	16	CA1 B	3		1.596						20	1	CA1 B	3		1.05908
16	5	CA1 B	4		1.58541						18	16	CA1 B	4		1.16162						20	1	CA1 B	4		1.0255
16	5	CA1 B	5		1.23831						18	16	CA1 B	5		1.30658						20	1	CA1 B	5		0.980643
24	5	CA1 B	1	1.1645	1.30171	1.17158	1.17158				25	16	CA1 B	1	1.51856	1.80312	1.52208	1.52208				28	1	CA1 B	1	1.10588	1.1999	1.11246	1.11246
24	5	CA1 B	2		1.38575						25	16	CA1 B	2		1.40911						28	1	CA1 B	2		1.06911
24	5	CA1 B	3		1.20733						25	16	CA1 B	3		1.36347						28	1	CA1 B	3		1.04508
24	5	CA1 B	4		0.978027						25	16	CA1 B	4		1.44013						28	1	CA1 B	4		0.988067
24	5	CA1 B	5		0.985094						25	16	CA1 B	5		1.59459						28	1	CA1 B	5		1.26014
32	13	CA1 B	1	1.76118	1.25009	1.76457	1.76457	1.76457			34	16	CA1 B	1	1.98453	1.8835	1.99131	1.99131				36	1	CA1 B	1	1.30188	1.03671	1.30459	1.30459
32	13	CA1 B	2		1.61806						34	16	CA1 B	2		2.19135						36	1	CA1 B	2		1.43684
32	13	CA1 B	3		2.43989						34	16	CA1 B	3		2.18365						36	1	CA1 B	3		1.18723
32	13	CA1 B	4		1.92488						34	16	CA1 B	4		1.63538						36	1	CA1 B	4		1.33219
32	13	CA1 B	5		1.58992						34	16	CA1 B	5		2.06268						36	1	CA1 B	5		1.52996
40	6	CA1 B	1	1.8026	1.60551	1.79852	1.79852	1.70978			42	12	CA1 B	1	1.1855	1.31482	1.18802	1.18802	1.18802			44	2	CA1 B	1	1.04694	0.878954	1.05986	1.05986	1.05986
40	6	CA1 B	2		1.55957						42	12	CA1 B	2		1.1494						44	2	CA1 B	2		1.13149
40	6	CA1 B	3		2.11621						42	12	CA1 B	3		1.08412						44	2	CA1 B	3		1.17965
40	6	CA1 B	4		1.65639						42	12	CA1 B	4		1.24506						44	2	CA1 B	4		1.06287
40	6	CA1 B	5		2.05492						42	12	CA1 B	5		1.14671						44	2	CA1 B	5		1.04633
46	6	CA1 B	1	1.62059	1.57546	1.62103	1.62103				48	15	CA1 B	1	1.55163	1.52802	1.5509	1.5509	1.5509			50	4	CA1 B	1	1.09891	1.01904	1.10021	1.10021	1.10021
46	6	CA1 B	2		1.83744						48	15	CA1 B	2		1.48723						50	4	CA1 B	2		0.985851
46	6	CA1 B	3		1.73003						48	15	CA1 B	3		1.74101						50	4	CA1 B	3		1.12447
46	6	CA1 B	4		1.39193						48	15	CA1 B	4		1.29882						50	4	CA1 B	4		1.25074
46	6	CA1 B	5		1.5703						48	15	CA1 B	5		1.69939						50	4	CA1 B	5		1.12098
Slide #	Animal #	Region	ROI #	Mean MF/Mean Soma	MF/Soma	Mean (MF/Soma)					Slide #	Animal #	Region	ROI #	Mean MF/Mean Soma	MF/Soma	Mean (MF/Soma)					Slide #	Animal #	Region	ROI #	Mean MF/Mean Soma	MF/Soma	Mean (MF/Soma)
16	5	CA3 A	1	1.04686	1.07952	1.05102	1.05102	1.42904	1.52712		18	16	CA3 A	1	1.06726	0.948385	1.07101	1.07101	1.35247	1.24463		20	1	CA3 A	1	0.717512	0.760291	0.729346	0.729346	0.779954	0.805804
16	5	CA3 A	2		1.00025						18	16	CA3 A	2		0.993718						20	1	CA3 A	2		0.741231
16	5	CA3 A	3		1.19305						18	16	CA3 A	3		1.07042						20	1	CA3 A	3		0.804433
16	5	CA3 A	4		1.04794						18	16	CA3 A	4		1.16126						20	1	CA3 A	4		0.603461
16	5	CA3 A	5		0.934334						18	16	CA3 A	5		1.18128						20	1	CA3 A	5		0.737314
24	5	CA3 A	1	1.79677	1.83418	1.80706	1.80706				25	16	CA3 A	1	1.26922	1.06153	1.28084	1.28084				28	1	CA3 A	1	0.873981	0.996835	0.880594	0.880594
24	5	CA3 A	2		1.59333						25	16	CA3 A	2		1.18541						28	1	CA3 A	2		0.893433
24	5	CA3 A	3		1.67283						25	16	CA3 A	3		1.33071						28	1	CA3 A	3		0.866125
24	5	CA3 A	4		2.10834						25	16	CA3 A	4		1.30219						28	1	CA3 A	4		0.78132
24	5	CA3 A	5		1.82662						25	16	CA3 A	5		1.52434						28	1	CA3 A	5		0.865257
32	13	CA3 A	1	1.82753	1.87291	1.83679	1.83679	1.83679			34	16	CA3 A	1	1.70059	1.97925	1.70556	1.70556				36	1	CA3 A	1	0.727298	0.775746	0.729924	0.729924
32	13	CA3 A	2		1.69382						34	16	CA3 A	2		1.97973						36	1	CA3 A	2		0.729361
32	13	CA3 A	3		2.04887						34	16	CA3 A	3		1.62313						36	1	CA3 A	3		0.697037
32	13	CA3 A	4		1.95302						34	16	CA3 A	4		1.51107						36	1	CA3 A	4		0.748174
32	13	CA3 A	5		1.61531						34	16	CA3 A	5		1.43462						36	1	CA3 A	5		0.699301
40	6	CA3 A	1	1.30416	1.0879	1.36553	1.36553	1.31553			42	12	CA3 A	1	1.28225	1.1223	1.2904	1.2904	1.2904			44	2	CA3 A	1	0.916998	0.787963	0.93928	0.93928	0.93928
40	6	CA3 A	2		2.30647						42	12	CA3 A	2		1.16518						44	2	CA3 A	2		1.25546
40	6	CA3 A	3		1.22255						42	12	CA3 A	3		1.39844						44	2	CA3 A	3		0.806041
40	6	CA3 A	4		1.2374						42	12	CA3 A	4		1.19359						44	2	CA3 A	4		0.863142
40	6	CA3 A	5		0.97333						42	12	CA3 A	5		1.57246						44	2	CA3 A	5		0.983791
46	6	CA3 A	1	1.27239	1.12649	1.26553	1.26553				48	15	CA3 A	1	1.07824	0.875525	1.09101	1.09101	1.09101			50	4	CA3 A	1	0.698294	0.602056	0.698178	0.698178	0.698178
46	6	CA3 A	2		1.16624						48	15	CA3 A	2		1.07619						50	4	CA3 A	2		0.702953
46	6	CA3 A	3		1.31451						48	15	CA3 A	3		1.08434						50	4	CA3 A	3		0.665335
46	6	CA3 A	4		1.23811						48	15	CA3 A	4		1.15072						50	4	CA3 A	4		0.793958
46	6	CA3 A	5		1.48232						48	15	CA3 A	5		1.26829						50	4	CA3 A	5		0.726591
Slide #	Animal #	Region	ROI #	Mean AIS/Mean Soma	AIS/Soma	Mean (AIS/Soma)					Slide #	Animal #	Region	ROI #	Mean AIS/Mean Soma	AIS/Soma	Mean (AIS/Soma)					Slide #	Animal #	Region	ROI #	Mean AIS/Mean Soma	AIS/Soma	Mean (AIS/Soma)
24	5	CA3 A	1	1.20294	1.25409	1.2001	1.2001	1.2001	1.21766		25	16	CA3 A	1	1.25205	1.02386	1.2623	1.2623	1.33118	1.21068		28	1	CA3 A	1	0.956673	0.942616	0.955971	0.955971	0.902306	0.934661
24	5	CA3 A	2		1.29164						25	16	CA3 A	2		1.12556						28	1	CA3 A	2		0.950414
24	5	CA3 A	3		1.22782						25	16	CA3 A	3		1.51814						28	1	CA3 A	3		0.925319
24	5	CA3 A	4		1.10544						25	16	CA3 A	4		1.36483						28	1	CA3 A	4		0.936354
24	5	CA3 A	5		1.12151						25	16	CA3 A	5		1.2791						28	1	CA3 A	5		1.02515
32	13	CA3 A	1	1.2686	1.41608	1.27065	1.27065	1.27065			34	16	CA3 A	1	1.40325	1.13693	1.40007	1.40007				36	1	CA3 A	1	0.846533	0.838577	0.848641	0.848641
32	13	CA3 A	2		1.04233						34	16	CA3 A	2		1.41973						36	1	CA3 A	2		0.839142
32	13	CA3 A	3		1.23571						34	16	CA3 A	3		1.32121						36	1	CA3 A	3		0.940986
32	13	CA3 A	4		1.18764						34	16	CA3 A	4		1.74231						36	1	CA3 A	4		0.809779
32	13	CA3 A	5		1.4715						34	16	CA3 A	5		1.38018						36	1	CA3 A	5		0.814721
40	6	CA3 A	1	1.15684	1.37812	1.19106	1.19106	1.18224			42	12	CA3 A	1	1.19042	1.17022	1.19361	1.19361	1.19361			44	2	CA3 A	1	0.976165	0.955689	0.997774	0.997774	0.997774
40	6	CA3 A	2		1.60915						42	12	CA3 A	2		1.08467						44	2	CA3 A	2		1.30635
40	6	CA3 A	3		0.860032						42	12	CA3 A	3		1.30448						44	2	CA3 A	3		0.903966
40	6	CA3 A	4		1.23821						42	12	CA3 A	4		1.15758						44	2	CA3 A	4		0.91917
40	6	CA3 A	5		0.869773						42	12	CA3 A	5		1.25111						44	2	CA3 A	5		0.903692
46	6	CA3 A	1	1.17483	1.0212	1.17342	1.17342				48	15	CA3 A	1	1.10253	1.01711	1.10724	1.10724	1.10724			50	4	CA3 A	1	0.904255	0.77521	0.903904	0.903904	0.903904
46	6	CA3 A	2		1.33926						48	15	CA3 A	2		1.13013						50	4	CA3 A	2		0.968107
46	6	CA3 A	3		1.15715						48	15	CA3 A	3		1.09053						50	4	CA3 A	3		1.12031
46	6	CA3 A	4		1.12118						48	15	CA3 A	4		1.17431						50	4	CA3 A	4		0.887575
46	6	CA3 A	5		1.22833						48	15	CA3 A	5		1.12412						50	4	CA3 A	5		0.768316
Slide #	Animal #	Region	ROI #	Mean Hilus/Mean Dentate	Hilus/Dentate	Mean (Hilus/Dentate)					Slide #	Animal #	Region	ROI #	Mean Hilus/Mean Dentate	Hilus/Dentate	Mean (Hilus/Dentate)					Slide #	Animal #	Region	ROI #	Mean Hilus/Mean Dentate	Hilus/Dentate	Mean (Hilus/Dentate)
16	5	DG	1	2.14024	2.72823	2.15818	2.15818	2.31022	2.41916		18	16	DG	1	1.80945	2.02435	1.81323	1.81323	2.62849	2.30584		20	1	DG	1	1.23848	1.24989	1.23875	1.23875	1.6286	1.63435
16	5	DG	2		2.04671						18	16	DG	2		1.8175						20	1	DG	2		1.17135
16	5	DG	3		2.13493						18	16	DG	3		1.82939						20	1	DG	3		1.27065
16	5	DG	4		1.75887						18	16	DG	4		1.82899						20	1	DG	4		1.28482
16	5	DG	5		2.12215						18	16	DG	5		1.56591						20	1	DG	5		1.21703
16	5	DG	all	2.0585							18	16	DG	all	1.60002							20	1	DG	all	1.20527
24	5	DG	1	2.31103	2.936	2.46226	2.46226				25	16	DG	1	2.33708	2.56552	2.34799	2.34799				28	1	DG	1	1.85434	1.68328	1.86254	1.86254
24	5	DG	2		1.82395						25	16	DG	2		2.39078						28	1	DG	2		2.04493
24	5	DG	3		3.23026						25	16	DG	3		2.38032						28	1	DG	3		1.8689
24	5	DG	4		1.69276						25	16	DG	4		2.27545						28	1	DG	4		1.9925
24	5	DG	5		2.62833						25	16	DG	5		2.1279						28	1	DG	5		1.7231
24	5	DG	all	2.08462							25	16	DG	all	2.13869							28	1	DG	all	1.71707
32	13	DG	1	2.9678	3.21402	2.99509	2.99509	2.99509			34	16	DG	1	3.71687	3.87214	3.72426	3.72426				36	1	DG	1	1.77237	1.36038	1.78451	1.78451
32	13	DG	2		3.08598						34	16	DG	2		3.88142						36	1	DG	2		1.86019
32	13	DG	3		3.2844						34	16	DG	3		3.77417						36	1	DG	3		2.05345
32	13	DG	4		2.55714						34	16	DG	4		3.28859						36	1	DG	4		1.83627
32	13	DG	5		2.8339						34	16	DG	5		3.80499						36	1	DG	5		1.81226
32	13	DG	all	2.71784							34	16	DG	all	3.0764							36	1	DG	all	1.73879
40	6	DG	1	1.85145	1.79168	1.85589	1.85589	1.95216			42	12	DG	1	2.22506	1.85824	2.24065	2.24065	2.24065			44	2	DG	1	1.66088	1.3075	1.69266	1.69266	1.69266
40	6	DG	2		1.99254						42	12	DG	2		2.42656						44	2	DG	2		2.29808
40	6	DG	3		1.87614						42	12	DG	3		2.27077						44	2	DG	3		1.57991
40	6	DG	4		1.7887						42	12	DG	4		2.3306						44	2	DG	4		1.78967
40	6	DG	5		1.83039						42	12	DG	5		2.31709						44	2	DG	5		1.48816
40	6	DG	all	1.9855							42	12	DG	all	2.12283							44	2	DG	all	1.62146
46	6	DG	1	2.0486	2.45554	2.04843	2.04843				48	15	DG	1	1.9831	1.67335	2.04836	2.04836	2.04836			50	4	DG	1	1.5734	1.85329	1.58177	1.58177	1.58177
46	6	DG	2		2.13097						48	15	DG	2		2.5684						50	4	DG	2		1.44134
46	6	DG	3		2.07357						48	15	DG	3		1.67739						50	4	DG	3		1.50076
46	6	DG	4		1.82319						48	15	DG	4		1.8788						50	4	DG	4		1.54303
46	6	DG	5		1.75891						48	15	DG	5		2.44388						50	4	DG	5		1.57044
46	6	DG	all	1.8974							48	15	DG	all	1.93327							50	4	DG	all	1.48508

## Sheet: Q2 for Prism
CA1 B Unnormalized				CA1 B Normalized
WT	E254fs	G256W		WT	E254fs	G256W
1.41773	1.6037	1.15898		0.869404	0.983446	0.710729
1.76457	1.18802	1.05986		1.0821	0.728539	0.649943
1.70978	1.5509	1.10021		1.0485	0.951067	0.674692
CA3 A MF Unnormalized				CA3 A MF Normalized
WT	E254fs	G256W		WT	E254fs	G256W
1.42904	1.35247	0.779954		0.935775	0.885634	0.510736
1.83679	1.2904	0.93928		1.20278	0.844987	0.615066
1.31553	1.09101	0.698178		0.861447	0.714425	0.457186
CA3 A AIS Unnormalized				CA3 AIS Normalized
WT	E254fs	G256W		WT	E254fs	G256W
1.2001	1.33118	0.902306		0.985576	1.09323	0.741014
1.27065	1.19361	0.997774		1.04352	0.980247	0.819417
1.18224	1.10724	0.903904		0.970908	0.909314	0.742327
DG Unnormalized				DG Normalized
WT	E254fs	G256W		WT	E254fs	G256W
2.31022	2.62849	1.6286		0.954969	1.08653	0.67321
2.99509	2.24065	1.69266		1.23807	0.926213	0.699692
1.95216	2.04836	1.58177		0.80696	0.846726	0.653853

## Sheet: Q3
WT											254											256
Image Details				Adjusted Ratio Method							Image Details				Adjusted Ratio Method							Image Details				Adjusted Ratio Method
Slide #	Animal #	Region	ROI #	Mean AIS/Mean Soma	AIS/Soma	Mean (AIS/Soma)					Slide #	Animal #	Region	ROI #	Mean AIS/Mean Soma	AIS/Soma	Mean (AIS/Soma)					Slide #	Animal #	Region	ROI #	Mean AIS/Mean Soma	AIS/Soma	Mean (AIS/Soma)
16	5	CA1 B	1	2.26381	1.9208	2.32349	2.32349	1.87334	2.18307		18	16	CA1 B	1	1.45086	1.47945	1.45918	1.45918	1.8304	1.70878		20	1	CA1 B	1	1.47432	1.46564	1.47235	1.47235	1.54765	1.28381
16	5	CA1 B	2		3.59343						18	16	CA1 B	2		1.50211						20	1	CA1 B	2		1.57236
16	5	CA1 B	3		2.68313						18	16	CA1 B	3		1.52473						20	1	CA1 B	3		1.55642
16	5	CA1 B	4		2.1591						18	16	CA1 B	4		1.16536						20	1	CA1 B	4		1.46534
16	5	CA1 B	5		1.26099						18	16	CA1 B	5		1.62425						20	1	CA1 B	5		1.302
24	5	CA1 B	1	1.41653	1.38272	1.4232	1.4232				25	16	CA1 B	1	1.92498	2.37589	1.93167	1.93167				28	1	CA1 B	1	1.47301	1.64675	1.48399	1.48399
24	5	CA1 B	2		2.12531						25	16	CA1 B	2		1.70418						28	1	CA1 B	2		1.41605
24	5	CA1 B	3		1.18022						25	16	CA1 B	3		1.75844						28	1	CA1 B	3		1.41222
24	5	CA1 B	4		1.10137						25	16	CA1 B	4		1.8542						28	1	CA1 B	4		1.31813
24	5	CA1 B	5		1.32637						25	16	CA1 B	5		1.96563						28	1	CA1 B	5		1.62683
32	13	CA1 B	1	2.03986	1.26095	2.04416	2.04416	2.04416			34	16	CA1 B	1	2.09441	1.98402	2.10037	2.10037				36	1	CA1 B	1	1.68464	1.28226	1.6866	1.6866
32	13	CA1 B	2		2.04987						34	16	CA1 B	2		2.17391						36	1	CA1 B	2		1.94203
32	13	CA1 B	3		2.96927						34	16	CA1 B	3		2.48686						36	1	CA1 B	3		1.67967
32	13	CA1 B	4		2.06125						34	16	CA1 B	4		1.7462						36	1	CA1 B	4		1.52108
32	13	CA1 B	5		1.87945						34	16	CA1 B	5		2.11084						36	1	CA1 B	5		2.00798
40	6	CA1 B	1	2.25422	2.03238	2.2662	2.2662	2.63171			42	12	CA1 B	1	1.28193	1.28112	1.28504	1.28504	1.28504			44	2	CA1 B	1	1.12135	0.878971	1.13223	1.13223	1.13223
40	6	CA1 B	2		1.64322						42	12	CA1 B	2		1.21984						44	2	CA1 B	2		1.09796
40	6	CA1 B	3		2.91617						42	12	CA1 B	3		1.17803						44	2	CA1 B	3		1.24799
40	6	CA1 B	4		1.87003						42	12	CA1 B	4		1.39272						44	2	CA1 B	4		1.20942
40	6	CA1 B	5		2.86922						42	12	CA1 B	5		1.35351						44	2	CA1 B	5		1.22678
46	6	CA1 B	1	2.99417	2.8944	2.99721	2.99721				48	15	CA1 B	1	2.01237	1.91012	2.01088	2.01088	2.01088			50	4	CA1 B	1	1.16942	0.994155	1.17156	1.17156	1.17156
46	6	CA1 B	2		3.71018						48	15	CA1 B	2		1.99038						50	4	CA1 B	2		1.05248
46	6	CA1 B	3		3.46067						48	15	CA1 B	3		2.28446						50	4	CA1 B	3		1.34871
46	6	CA1 B	4		2.39655						48	15	CA1 B	4		1.57081						50	4	CA1 B	4		1.26629
46	6	CA1 B	5		2.52427						48	15	CA1 B	5		2.29863						50	4	CA1 B	5		1.19615
Slide #	Animal #	Region	ROI #	Mean MF/Mean Soma	MF/Soma	Mean (MF/Soma)					Slide #	Animal #	Region	ROI #	Mean MF/Mean Soma	MF/Soma	Mean (MF/Soma)					Slide #	Animal #	Region	ROI #	Mean MF/Mean Soma	MF/Soma	Mean (MF/Soma)
16	5	CA3 A	1	1.46016	1.49276	1.46697	1.46697	1.80532	1.84088		18	16	CA3 A	1	1.48116	1.64175	1.49382	1.49382	1.63962	1.54283		20	1	CA3 A	1	1.14668	1.11621	1.1632	1.1632	1.2734	1.10922
16	5	CA3 A	2		1.38672						18	16	CA3 A	2		1.5444						20	1	CA3 A	2		1.37964
16	5	CA3 A	3		1.73188						18	16	CA3 A	3		1.44195						20	1	CA3 A	3		1.11212
16	5	CA3 A	4		1.39947						18	16	CA3 A	4		1.45954						20	1	CA3 A	4		0.9934
16	5	CA3 A	5		1.32403						18	16	CA3 A	5		1.38146						20	1	CA3 A	5		1.21464
24	5	CA3 A	1	2.08987	1.86738	2.14366	2.14366				25	16	CA3 A	1	1.45446	1.403	1.45537	1.45537				28	1	CA3 A	1	1.32273	1.39575	1.32431	1.32431
24	5	CA3 A	2		1.70309						25	16	CA3 A	2		1.49632						28	1	CA3 A	2		1.27048
24	5	CA3 A	3		2.0521						25	16	CA3 A	3		1.48131						28	1	CA3 A	3		1.33126
24	5	CA3 A	4		2.70777						25	16	CA3 A	4		1.37019						28	1	CA3 A	4		1.27318
24	5	CA3 A	5		2.38799						25	16	CA3 A	5		1.52602						28	1	CA3 A	5		1.35089
32	13	CA3 A	1	1.93551	1.87626	1.94216	1.94216	1.94216			34	16	CA3 A	1	1.96555	1.97054	1.96966	1.96966				36	1	CA3 A	1	1.33572	1.21677	1.33268	1.33268
32	13	CA3 A	2		1.71343						34	16	CA3 A	2		1.99326						36	1	CA3 A	2		1.33163
32	13	CA3 A	3		2.11855						34	16	CA3 A	3		1.86474						36	1	CA3 A	3		1.17538
32	13	CA3 A	4		2.11394						34	16	CA3 A	4		2.13278						36	1	CA3 A	4		1.52479
32	13	CA3 A	5		1.88861						34	16	CA3 A	5		1.88697						36	1	CA3 A	5		1.41486
40	6	CA3 A	1	1.59474	1.25361	1.68263	1.68263	1.77517			42	12	CA3 A	1	1.49971	1.43762	1.50471	1.50471	1.50471			44	2	CA3 A	1	1.08682	1.01161	1.13692	1.13692	1.13692
40	6	CA3 A	2		2.7086						42	12	CA3 A	2		1.63017						44	2	CA3 A	2		1.69313
40	6	CA3 A	3		1.55979						42	12	CA3 A	3		1.59621						44	2	CA3 A	3		0.904474
40	6	CA3 A	4		1.7718						42	12	CA3 A	4		1.35944						44	2	CA3 A	4		1.00443
40	6	CA3 A	5		1.11934						42	12	CA3 A	5		1.50009						44	2	CA3 A	5		1.07095
46	6	CA3 A	1	1.8743	1.60284	1.86772	1.86772				48	15	CA3 A	1	1.48453	1.48598	1.48416	1.48416	1.48416			50	4	CA3 A	1	0.914574	0.867858	0.917356	0.917356	0.917356
46	6	CA3 A	2		1.8153						48	15	CA3 A	2		1.45581						50	4	CA3 A	2		0.976717
46	6	CA3 A	3		2.12491						48	15	CA3 A	3		1.49716						50	4	CA3 A	3		0.962156
46	6	CA3 A	4		1.76531						48	15	CA3 A	4		1.43988						50	4	CA3 A	4		0.912474
46	6	CA3 A	5		2.03023						48	15	CA3 A	5		1.54198						50	4	CA3 A	5		0.867573
Slide #	Animal #	Region	ROI #	Mean AIS/Mean Soma	AIS/Soma	Mean (AIS/Soma)					Slide #	Animal #	Region	ROI #	Mean AIS/Mean Soma	AIS/Soma	Mean (AIS/Soma)					Slide #	Animal #	Region	ROI #	Mean AIS/Mean Soma	AIS/Soma	Mean (AIS/Soma)
24	5	CA3 A	1	1.27793	1.2879	1.26582	1.26582	1.26582	1.31568		25	16	CA3 A	1	1.31638	1.0363	1.3134	1.3134	1.41511	1.35266		28	1	CA3 A	1	1.11483	1.07116	1.11251	1.11251	1.16589	1.04814
24	5	CA3 A	2		1.37661						25	16	CA3 A	2		1.28201						28	1	CA3 A	2		1.05775
24	5	CA3 A	3		1.30801						25	16	CA3 A	3		1.57985						28	1	CA3 A	3		1.11404
24	5	CA3 A	4		1.11669						25	16	CA3 A	4		1.37096						28	1	CA3 A	4		1.11652
24	5	CA3 A	5		1.23987						25	16	CA3 A	5		1.29788						28	1	CA3 A	5		1.20308
32	13	CA3 A	1	1.30369	1.43824	1.31014	1.31014	1.31014			34	16	CA3 A	1	1.48538	1.23334	1.51682	1.51682				36	1	CA3 A	1	1.22679	1.12172	1.21927	1.21927
32	13	CA3 A	2		1.07806						34	16	CA3 A	2		1.46199						36	1	CA3 A	2		1.11198
32	13	CA3 A	3		1.25076						34	16	CA3 A	3		1.28098						36	1	CA3 A	3		1.20933
32	13	CA3 A	4		1.29069						34	16	CA3 A	4		1.99426						36	1	CA3 A	4		1.25265
32	13	CA3 A	5		1.49295						34	16	CA3 A	5		1.61351						36	1	CA3 A	5		1.40069
40	6	CA3 A	1	1.26903	1.41189	1.31219	1.31219	1.37108			42	12	CA3 A	1	1.3113	1.37335	1.31602	1.31602	1.31602			44	2	CA3 A	1	1.00175	0.957372	1.04079	1.04079	1.04079
40	6	CA3 A	2		1.77458						42	12	CA3 A	2		1.3254						44	2	CA3 A	2		1.45027
40	6	CA3 A	3		1.01329						42	12	CA3 A	3		1.3596						44	2	CA3 A	3		0.918643
40	6	CA3 A	4		1.54307						42	12	CA3 A	4		1.27518						44	2	CA3 A	4		0.990076
40	6	CA3 A	5		0.818115						42	12	CA3 A	5		1.24656						44	2	CA3 A	5		0.887588
46	6	CA3 A	1	1.42711	1.12429	1.42997	1.42997				48	15	CA3 A	1	1.32678	1.3406	1.32687	1.32687	1.32687			50	4	CA3 A	1	0.930454	0.804391	0.937749	0.937749	0.937749
46	6	CA3 A	2		1.67574						48	15	CA3 A	2		1.30966						50	4	CA3 A	2		0.989188
46	6	CA3 A	3		1.56824						48	15	CA3 A	3		1.3066						50	4	CA3 A	3		1.19614
46	6	CA3 A	4		1.28503						48	15	CA3 A	4		1.3645						50	4	CA3 A	4		0.864749
46	6	CA3 A	5		1.49655						48	15	CA3 A	5		1.31298						50	4	CA3 A	5		0.834276
Slide #	Animal #	Region	ROI #	Mean Hilus/Mean Dentate	Hilus/Dentate	Mean (Hilus/Dentate)					Slide #	Animal #	Region	ROI #	Mean Hilus/Mean Dentate	Hilus/Dentate	Mean (Hilus/Dentate)					Slide #	Animal #	Region	ROI #	Mean Hilus/Mean Dentate	Hilus/Dentate	Mean (Hilus/Dentate)
16	5	DG	1	2.23581	2.72463	2.25034	2.25034	2.17501	2.14362		18	16	DG	1	2.02104	2.55812	2.03527	2.03527	2.30044	2.02876		20	1	DG	1	1.42834	1.51152	1.42927	1.42927	1.57879	1.52454
16	5	DG	2		2.05715						18	16	DG	2		2.03016						20	1	DG	2		1.38275
16	5	DG	3		2.37997						18	16	DG	3		2.03826						20	1	DG	3		1.40914
16	5	DG	4		1.77146						18	16	DG	4		1.97106						20	1	DG	4		1.43577
16	5	DG	5		2.3185						18	16	DG	5		1.57877						20	1	DG	5		1.4072
24	5	DG	1	2.04299	2.44741	2.09969	2.09969				25	16	DG	1	1.99323	2.26677	2.0029	2.0029				28	1	DG	1	1.721	1.84229	1.72397	1.72397
24	5	DG	2		1.74906						25	16	DG	2		1.972						28	1	DG	2		1.90646
24	5	DG	3		2.52375						25	16	DG	3		1.97273						28	1	DG	3		1.63307
24	5	DG	4		1.59557						25	16	DG	4		1.98888						28	1	DG	4		1.7279
24	5	DG	5		2.18265						25	16	DG	5		1.81413						28	1	DG	5		1.51011
32	13	DG	1	2.35058	2.37111	2.3633	2.3633	2.3633			34	16	DG	1	2.85786	2.95941	2.86313	2.86313				36	1	DG	1	1.5744	1.46447	1.58313	1.58313
32	13	DG	2		2.58038						34	16	DG	2		3.03957						36	1	DG	2		1.64254
32	13	DG	3		2.54059						34	16	DG	3		2.8945						36	1	DG	3		1.77081
32	13	DG	4		2.09097						34	16	DG	4		2.5056						36	1	DG	4		1.64634
32	13	DG	5		2.23345						34	16	DG	5		2.91658						36	1	DG	5		1.3915
40	6	DG	1	1.77053	1.77563	1.77523	1.77523	1.89255			42	12	DG	1	1.86951	1.66675	1.87649	1.87649	1.87649			44	2	DG	1	1.49159	1.21494	1.51313	1.51313	1.51313
40	6	DG	2		1.78799						42	12	DG	2		1.93291						44	2	DG	2		2.09136
40	6	DG	3		1.90821						42	12	DG	3		1.95171						44	2	DG	3		1.38893
40	6	DG	4		1.61705						42	12	DG	4		1.99352						44	2	DG	4		1.59595
40	6	DG	5		1.78727						42	12	DG	5		1.83758						44	2	DG	5		1.27448
46	6	DG	1	2.01408	2.34682	2.00988	2.00988				48	15	DG	1	1.82449	1.57227	1.90934	1.90934	1.90934			50	4	DG	1	1.47144	1.72215	1.48171	1.48171	1.48171
46	6	DG	2		2.124						48	15	DG	2		2.47774						50	4	DG	2		1.3487
46	6	DG	3		2.01658						48	15	DG	3		1.44733						50	4	DG	3		1.33555
46	6	DG	4		1.80715						48	15	DG	4		1.71984						50	4	DG	4		1.45853
46	6	DG	5		1.75485						48	15	DG	5		2.3295						50	4	DG	5		1.54363

## Sheet: Q3 for Prism
CA1 B Unnormalized				CA1 B Normalized
WT	E254fs	G256W		WT	E254fs	G256W
1.87334	1.8304	1.54765		0.858124	0.838454	0.708933
2.04416	1.28504	1.13223		0.936368	0.588641	0.518639
2.63171	2.01088	1.17156		1.20551	0.921126	0.536656
CA3 A MF Unnormalized				CA3 A MF Normalized
WT	E254fs	G256W		WT	E254fs	G256W
1.80532	1.63962	1.2734		0.98068	0.890667	0.691732
1.94216	1.50471	1.13692		1.05501	0.817384	0.617594
1.77517	1.48416	0.917356		0.964306	0.806223	0.498323
CA3 A AIS Unnormalized				CA3 AIS Normalized
WT	E254fs	G256W		WT	E254fs	G256W
1.26582	1.41511	1.16589		0.962102	1.07557	0.886154
1.31014	1.31602	1.04079		0.99579	1.00026	0.791068
1.37108	1.32687	0.937749		1.04211	1.00851	0.71275
DG Unnormalized				DG Normalized
WT	E254fs	G256W		WT	E254fs	G256W
2.17501	2.30044	1.57879		1.01464	1.07315	0.736506
2.3633	1.87649	1.51313		1.10248	0.875384	0.705876
1.89255	1.90934	1.48171		0.882877	0.890705	0.691218

## Sheet: PanNa-V
WT											254											256
Image Details				Adjusted Ratio Method							Image Details				Adjusted Ratio Method							Image Details				Adjusted Ratio Method
Slide #	Animal #	Region	ROI #	Mean AIS/Mean Soma	AIS/Soma	Mean (AIS/Soma)					Slide #	Animal #	Region	ROI #	Mean AIS/Mean Soma	AIS/Soma	Mean (AIS/Soma)					Slide #	Animal #	Region	ROI #	Mean AIS/Mean Soma	AIS/Soma	Mean (AIS/Soma)
16	5	CA1 B	1	2.78183	2.05878	2.96861	2.07124	1.71425	1.65104		18	16	CA1 B	1	2.02355	2.46257	2.03635	1.52118	1.79111	1.80134		20	1	CA1 B	1	2.42593	2.2762	2.45095	1.69943	1.60481	1.59323
16	5	CA1 B	2		4.81102						18	16	CA1 B	2		1.99073						20	1	CA1 B	2		2.27861
16	5	CA1 B	3		3.79396						18	16	CA1 B	3		2.28993						20	1	CA1 B	3		3.16792
16	5	CA1 B	4		2.47659						18	16	CA1 B	4		1.49109						20	1	CA1 B	4		2.69521
16	5	CA1 B	5		1.7027						18	16	CA1 B	5		1.94743						20	1	CA1 B	5		1.83681
16	5	CA1 B	all	2.07124							18	16	CA1 B	all	1.52118							20	1	CA1 B	all	1.69943
24	5	CA1 B	1	2.27964	2.02782	2.32884	1.35726				25	16	CA1 B	1	2.95772	3.43611	2.98298	1.88853				28	1	CA1 B	1	2.57625	2.69709	2.57905	1.50903
24	5	CA1 B	2		3.20027						25	16	CA1 B	2		2.67484						28	1	CA1 B	2		2.31469
24	5	CA1 B	3		2.3074						25	16	CA1 B	3		2.58027						28	1	CA1 B	3		2.60022
24	5	CA1 B	4		2.07016						25	16	CA1 B	4		2.79288						28	1	CA1 B	4		2.71096
24	5	CA1 B	5		2.03855						25	16	CA1 B	5		3.43083						28	1	CA1 B	5		2.57231
24	5	CA1 B	all	1.35726							25	16	CA1 B	all	1.88853							28	1	CA1 B	all	1.50903
32	13	CA1 B	1	2.32844	1.56399	2.3592	1.5873	1.5873			34	16	CA1 B	1	3.29922	3.51159	3.32209	1.96361				36	1	CA1 B	1	2.74058	2.59093	2.74985	1.60598
32	13	CA1 B	2		2.64449						34	16	CA1 B	2		2.87295						36	1	CA1 B	2		3.31327
32	13	CA1 B	3		2.99804						34	16	CA1 B	3		3.83287						36	1	CA1 B	3		2.47361
32	13	CA1 B	4		2.41999						34	16	CA1 B	4		3.06368						36	1	CA1 B	4		2.5825
32	13	CA1 B	5		2.1695						34	16	CA1 B	5		3.32935						36	1	CA1 B	5		2.78892
32	13	CA1 B	all	1.5873							34	16	CA1 B	all	1.96361							36	1	CA1 B	all	1.60598
40	6	CA1 B	1	2.96729	3.03203	3.00475	1.54105	1.65158			42	12	CA1 B	1	2.5699	2.95909	2.60022	1.77526	1.77526			44	2	CA1 B	1	1.82442	1.06514	1.95501	1.27772	1.27772
40	6	CA1 B	2		3.27126						42	12	CA1 B	2		2.89465						44	2	CA1 B	2		1.23002
40	6	CA1 B	3		3.52075						42	12	CA1 B	3		2.22302						44	2	CA1 B	3		2.15462
40	6	CA1 B	4		2.32272						42	12	CA1 B	4		2.87808						44	2	CA1 B	4		3.08468
40	6	CA1 B	5		2.87701						42	12	CA1 B	5		2.04625						44	2	CA1 B	5		2.24057
40	6	CA1 B	all	1.54105							42	12	CA1 B	all	1.77526							44	2	CA1 B	all	1.27772
46	6	CA1 B	1	3.48322	3.07835	3.49588	1.7621				48	15	CA1 B	1	3.57848	3.3383	3.57689	1.83765	1.83765			50	4	CA1 B	1	3.57711	3.49134	3.58708	1.89718	1.89718
46	6	CA1 B	2		3.83235						48	15	CA1 B	2		3.65732						50	4	CA1 B	2		3.01656
46	6	CA1 B	3		3.80433						48	15	CA1 B	3		3.26988						50	4	CA1 B	3		3.43232
46	6	CA1 B	4		3.22901						48	15	CA1 B	4		4.1453						50	4	CA1 B	4		3.50346
46	6	CA1 B	5		3.53535						48	15	CA1 B	5		3.47367						50	4	CA1 B	5		4.49171
46	6	CA1 B	all	1.7621							48	15	CA1 B	all	1.83765							50	4	CA1 B	all	1.89718
Slide #	Animal #	Region	ROI #	Mean MF/Mean Soma	MF/Soma	Mean (MF/Soma)					Slide #	Animal #	Region	ROI #	Mean MF/Mean Soma	MF/Soma	Mean (MF/Soma)					Slide #	Animal #	Region	ROI #	Mean MF/Mean Soma	MF/Soma	Mean (MF/Soma)
16	5	CA3 A	1	1.06212	1.05462	1.09075	0.900361	1.18439	1.32157		18	16	CA3 A	1	0.971432	0.827596	0.976546	0.864487	1.09308	1.27658		20	1	CA3 A	1	0.869054	0.754871	0.871935	0.820097	1.08604	1.23587
16	5	CA3 A	2		0.939388						18	16	CA3 A	2		0.895621						20	1	CA3 A	2		0.938999
16	5	CA3 A	3		1.46246						18	16	CA3 A	3		1.10493						20	1	CA3 A	3		0.912446
16	5	CA3 A	4		1.14199						18	16	CA3 A	4		1.02665						20	1	CA3 A	4		0.881313
16	5	CA3 A	5		0.855275						18	16	CA3 A	5		1.02793						20	1	CA3 A	5		0.872044
16	5	CA3 A	all	0.900361							18	16	CA3 A	all	0.864487							20	1	CA3 A	all	0.820097
24	5	CA3 A	1	1.96596	2.08252	1.98938	1.46842				25	16	CA3 A	1	1.27227	0.974174	1.29178	1.09095				28	1	CA3 A	1	1.45763	1.38496	1.45862	1.20709
24	5	CA3 A	2		1.52626						25	16	CA3 A	2		1.39209						28	1	CA3 A	2		1.55952
24	5	CA3 A	3		1.95041						25	16	CA3 A	3		1.4123						28	1	CA3 A	3		1.4315
24	5	CA3 A	4		2.34589						25	16	CA3 A	4		1.28866						28	1	CA3 A	4		1.45077
24	5	CA3 A	5		2.0418						25	16	CA3 A	5		1.39167						28	1	CA3 A	5		1.46634
24	5	CA3 A	all	1.46842							25	16	CA3 A	all	1.09095							28	1	CA3 A	all	1.20709
32	13	CA3 A	1	1.79662	1.76574	1.80826	1.51996	1.51996			34	16	CA3 A	1	1.57465	1.58662	1.57521	1.32381				36	1	CA3 A	1	1.28001	1.13871	1.27992	1.23094
32	13	CA3 A	2		1.58262						34	16	CA3 A	2		1.70931						36	1	CA3 A	2		1.32588
32	13	CA3 A	3		2.02639						34	16	CA3 A	3		1.57258						36	1	CA3 A	3		1.19116
32	13	CA3 A	4		2.11152						34	16	CA3 A	4		1.53674						36	1	CA3 A	4		1.43838
32	13	CA3 A	5		1.55501						34	16	CA3 A	5		1.47079						36	1	CA3 A	5		1.3055
32	13	CA3 A	all	1.51996							34	16	CA3 A	all	1.32381							36	1	CA3 A	all	1.23094
40	6	CA3 A	1	1.54577	1.20443	1.62387	1.35797	1.26037			42	12	CA3 A	1	1.72889	1.69803	1.73425	1.52976	1.52976			44	2	CA3 A	1	1.70345	1.52399	1.77821	1.60871	1.60871
40	6	CA3 A	2		2.77813						42	12	CA3 A	2		1.6369						44	2	CA3 A	2		2.66787
40	6	CA3 A	3		1.47629						42	12	CA3 A	3		1.96598						44	2	CA3 A	3		1.57492
40	6	CA3 A	4		1.673						42	12	CA3 A	4		1.51768						44	2	CA3 A	4		1.46985
40	6	CA3 A	5		0.987499						42	12	CA3 A	5		1.85267						44	2	CA3 A	5		1.65444
40	6	CA3 A	all	1.35797							42	12	CA3 A	all	1.52976							44	2	CA3 A	all	1.60871
46	6	CA3 A	1	1.45769	1.18623	1.46475	1.16277				48	15	CA3 A	1	1.49051	1.31275	1.49358	1.2069	1.2069			50	4	CA3 A	1	1.22186	0.822665	1.25231	1.01287	1.01287
46	6	CA3 A	2		1.22359						48	15	CA3 A	2		1.42579						50	4	CA3 A	2		1.04114
46	6	CA3 A	3		1.92727						48	15	CA3 A	3		1.72367						50	4	CA3 A	3		1.47015
46	6	CA3 A	4		1.3059						48	15	CA3 A	4		1.49821						50	4	CA3 A	4		1.44623
46	6	CA3 A	5		1.68079						48	15	CA3 A	5		1.50748						50	4	CA3 A	5		1.48136
46		CA3 A	all	1.16277							48	15	CA3 A	all	1.2069							50	4	CA3 A	all	1.01287
Slide #	Animal #	Region	ROI #	Mean AIS/Mean Soma	AIS/Soma	Mean (AIS/Soma)					Slide #	Animal #	Region	ROI #	Mean AIS/Mean Soma	AIS/Soma	Mean (AIS/Soma)					Slide #	Animal #	Region	ROI #	Mean AIS/Mean Soma	AIS/Soma	Mean (AIS/Soma)
24	5	CA3 A	1	1.61689	1.51342	1.62111	1.32565	1.32565	1.33693		25	16	CA3 A	1	1.51666	1.38585	1.52967	1.21128	1.2792	1.36156		28	1	CA3 A	1	1.96045	1.64398	1.95677	1.36016	1.32019	1.30795
24	5	CA3 A	2		1.46315						25	16	CA3 A	2		1.48871						28	1	CA3 A	2		1.82571
24	5	CA3 A	3		1.79908						25	16	CA3 A	3		1.89203						28	1	CA3 A	3		1.70858
24	5	CA3 A	4		1.58929						25	16	CA3 A	4		1.36622						28	1	CA3 A	4		2.33731
24	5	CA3 A	5		1.74064						25	16	CA3 A	5		1.51554						28	1	CA3 A	5		2.26827
24	5	CA3 A	all	1.32565							25	16	CA3 A	all	1.21128							28	1	CA3 A	all	1.36016
32	13	CA3 A	1	1.77622	1.99851	1.78852	1.34108	1.34108			34	16	CA3 A	1	1.62654	1.30527	1.62466	1.34713				36	1	CA3 A	1	1.54184	1.40897	1.54155	1.28022
32	13	CA3 A	2		1.32757						34	16	CA3 A	2		1.58213						36	1	CA3 A	2		1.55737
32	13	CA3 A	3		1.71399						34	16	CA3 A	3		1.42045						36	1	CA3 A	3		1.6963
32	13	CA3 A	4		1.86566						34	16	CA3 A	4		2.06272						36	1	CA3 A	4		1.48498
32	13	CA3 A	5		2.03685						34	16	CA3 A	5		1.7527						36	1	CA3 A	5		1.56011
32	13	CA3 A	all	1.34108							34	16	CA3 A	all	1.34713							36	1	CA3 A	all	1.28022
40	6	CA3 A	1	1.71712	2.1861	1.78999	1.34079	1.34406			42	12	CA3 A	1	1.95204	1.84441	1.95191	1.5132	1.5132			44	2	CA3 A	1	1.75613	1.85912	1.85884	1.32273	1.32273
40	6	CA3 A	2		2.1261						42	12	CA3 A	2		1.89958						44	2	CA3 A	2		2.77707
40	6	CA3 A	3		1.19321						42	12	CA3 A	3		2.20619						44	2	CA3 A	3		1.82856
40	6	CA3 A	4		2.28098						42	12	CA3 A	4		1.90583						44	2	CA3 A	4		1.42829
40	6	CA3 A	5		1.16356						42	12	CA3 A	5		1.90356						44	2	CA3 A	5		1.40118
40	6	CA3 A	all	1.34079							42	12	CA3 A	all	1.5132							44	2	CA3 A	all	1.32273
46	6	CA3 A	1	2.02754	2.13688	2.08767	1.34734				48	15	CA3 A	1	1.89382	2.15725	1.88492	1.29229	1.29229			50	4	CA3 A	1	1.79084	1.55177	1.81549	1.28093	1.28093
46	6	CA3 A	2		2.49865						48	15	CA3 A	2		1.90796						50	4	CA3 A	2		1.69655
46	6	CA3 A	3		2.57964						48	15	CA3 A	3		1.93486						50	4	CA3 A	3		2.07593
46	6	CA3 A	4		1.49497						48	15	CA3 A	4		1.81903						50	4	CA3 A	4		1.80672
46	6	CA3 A	5		1.7282						48	15	CA3 A	5		1.60551						50	4	CA3 A	5		1.9465
46	6	CA3 A	all	1.34734							48	15	CA3 A	all	1.29229							50	4	CA3 A	all	1.28093
Slide #	Animal #	Region	ROI #	Mean Hilus/Mean Dentate	Hilus/Dentate	Mean (Hilus/Dentate)					Slide #	Animal #	Region	ROI #	Mean Hilus/Mean Dentate	Hilus/Dentate	Mean (Hilus/Dentate)					Slide #	Animal #	Region	ROI #	Mean Hilus/Mean Dentate	Hilus/Dentate	Mean (Hilus/Dentate)
16	5	DG	1	0.994287	1.1927	1.00191	1.12753	1.14179	1.14364		18	16	DG	1	0.995269	1.191	0.99883	0.962255	1.15828	1.08317		20	1	DG	1	1.00666	1.017	1.00585	0.908739	1.10914	1.00082
16	5	DG	2		0.946895						18	16	DG	2		0.884004						20	1	DG	2		0.7639
16	5	DG	3		1.02033						18	16	DG	3		0.844123						20	1	DG	3		0.979158
16	5	DG	4		0.821152						18	16	DG	4		1.00213						20	1	DG	4		1.10675
16	5	DG	5		1.02849						18	16	DG	5		1.0729						20	1	DG	5		1.16242
16	5	DG	all	1.12753							18	16	DG	all	0.962255							20	1	DG	all	0.908739
24	5	DG	1	1.07385	0.948433	1.07776	1.15605				25	16	DG	1	1.07373	1.11581	1.07797	1.1167				28	1	DG	1	1.07317	1.28576	1.10683	1.14036
24	5	DG	2		1.19345						25	16	DG	2		0.99176						28	1	DG	2		1.21136
24	5	DG	3		1.12412						25	16	DG	3		1.04853						28	1	DG	3		1.14167
24	5	DG	4		1.20745						25	16	DG	4		1.21548						28	1	DG	4		1.14998
24	5	DG	5		0.915336						25	16	DG	5		1.01826						28	1	DG	5		0.745383
24	5	DG	all	1.15605							25	16	DG	all	1.1167							28	1	DG	all	1.14036
32	13	DG	1	1.40606	1.42857	1.42002	1.40894	1.40894			34	16	DG	1	1.49476	1.52937	1.50495	1.3959				36	1	DG	1	1.24068	1.1298	1.25398	1.27833
32	13	DG	2		1.4419						34	16	DG	2		1.63309						36	1	DG	2		1.21953
32	13	DG	3		1.59543						34	16	DG	3		1.40078						36	1	DG	3		1.54754
32	13	DG	4		1.10795						34	16	DG	4		1.30019						36	1	DG	4		1.15885
32	13	DG	5		1.52626						34	16	DG	5		1.66133						36	1	DG	5		1.2142
32	13	DG	all	1.40894							34	16	DG	all	1.3959							36	1	DG	all	1.27833
40	6	DG	1	0.7505	0.627584	0.75566	0.965856	0.880196			42	12	DG	1	1.09119	0.852689	1.10335	1.17994	1.17994			44	2	DG	1	0.869971	0.810254	0.899831	1.07679	1.07679
40	6	DG	2		0.757431						42	12	DG	2		1.18602						44	2	DG	2		1.33947
40	6	DG	3		0.825285						42	12	DG	3		1.12588						44	2	DG	3		0.794319
40	6	DG	4		0.759624						42	12	DG	4		1.25247						44	2	DG	4		0.735062
40	6	DG	5		0.808377						42	12	DG	5		1.09971						44	2	DG	5		0.820047
40	6	DG	all	0.965856							42	12	DG	all	1.17994							44	2	DG	all	1.07679
46	6	DG	1	0.686483	0.819388	0.692498	0.794536				48	15	DG	1	0.909264	0.792528	0.96211	0.911285	0.911285			50	4	DG	1	0.828877	0.906882	0.835407	0.816542	0.816542
46	6	DG	2		0.640942						48	15	DG	2		1.18871						50	4	DG	2		0.724168
46	6	DG	3		0.746148						48	15	DG	3		0.597938						50	4	DG	3		0.707644
46	6	DG	4		0.688903						48	15	DG	4		1.08061						50	4	DG	4		0.861691
46	6	DG	5		0.567111						48	15	DG	5		1.15077						50	4	DG	5		0.976648
46	6	DG	all	0.794536							48	15	DG	all	0.911285							50	4	DG	all	0.816542

## Sheet: DAPI
WT											254											256
Image Details				Adjusted Ratio Method							Image Details				Adjusted Ratio Method							Image Details				Adjusted Ratio Method
Slide #	Animal #	Region	ROI #	Mean AIS/Mean Soma	AIS/Soma	Mean (AIS/Soma)					Slide #	Animal #	Region	ROI #	Mean AIS/Mean Soma	AIS/Soma	Mean (AIS/Soma)					Slide #	Animal #	Region	ROI #	Mean AIS/Mean Soma	AIS/Soma	Mean (AIS/Soma)
16	5	CA1 B	1	0.900593	0.6749	0.908069	0.836216	0.723675	0.704299		18	16	CA1 B	1	0.908123	0.933603	0.910612	0.832632	0.816879	0.7401		20	1	CA1 B	1	0.937858	0.873534	0.944922	0.672838	0.72415	0.713706
16	5	CA1 B	2		0.947383						18	16	CA1 B	2		0.937391						20	1	CA1 B	2		1.20697
16	5	CA1 B	3		1.00608						18	16	CA1 B	3		0.917186						20	1	CA1 B	3		0.932768
16	5	CA1 B	4		0.901995						18	16	CA1 B	4		0.840619						20	1	CA1 B	4		0.959614
16	5	CA1 B	5		1.00999						18	16	CA1 B	5		0.92426						20	1	CA1 B	5		0.751727
16	5	CA1 B	all	0.836216							18	16	CA1 B	all	0.832632							20	1	CA1 B	all	0.672838
24	5	CA1 B	1	0.546673	0.307881	0.543203	0.611134				25	16	CA1 B	1	0.900853	0.818276	0.904133	0.809871				28	1	CA1 B	1	0.836371	0.596132	0.843592	0.762982
24	5	CA1 B	2		0.335966						25	16	CA1 B	2		0.898331						28	1	CA1 B	2		0.753814
24	5	CA1 B	3		0.729095						25	16	CA1 B	3		0.894227						28	1	CA1 B	3		0.947672
24	5	CA1 B	4		0.627689						25	16	CA1 B	4		0.850524						28	1	CA1 B	4		0.930789
24	5	CA1 B	5		0.715384						25	16	CA1 B	5		1.05931						28	1	CA1 B	5		0.989552
24	5	CA1 B	all	0.611134							25	16	CA1 B	all	0.809871							28	1	CA1 B	all	0.762982
32	13	CA1 B	1	0.882104	1.05569	0.895472	0.813337	0.813337			34	16	CA1 B	1	0.853235	0.665785	0.850266	0.808135				36	1	CA1 B	1	0.72093	0.737077	0.719959	0.736632
32	13	CA1 B	2		1.22092						34	16	CA1 B	2		0.922643						36	1	CA1 B	2		0.665301
32	13	CA1 B	3		0.65194						34	16	CA1 B	3		0.885976						36	1	CA1 B	3		0.588559
32	13	CA1 B	4		0.709035						34	16	CA1 B	4		0.826566						36	1	CA1 B	4		0.849194
32	13	CA1 B	5		0.839772						34	16	CA1 B	5		0.950362						36	1	CA1 B	5		0.759663
32	13	CA1 B	all	0.813337							34	16	CA1 B	all	0.808135							36	1	CA1 B	all	0.736632
40	6	CA1 B	1	0.514672	0.557966	0.508865	0.623963	0.575887			42	12	CA1 B	1	0.896459	0.864218	0.90635	0.762472	0.762472			44	2	CA1 B	1	0.410599	0.433274	0.43159	0.686627	0.686627
40	6	CA1 B	2		0.692144						42	12	CA1 B	2		0.780231						44	2	CA1 B	2		0.540575
40	6	CA1 B	3		0.368789						42	12	CA1 B	3		0.922474						44	2	CA1 B	3		0.14343
40	6	CA1 B	4		0.410548						42	12	CA1 B	4		0.903106						44	2	CA1 B	4		0.282888
40	6	CA1 B	5		0.51488						42	12	CA1 B	5		1.06172						44	2	CA1 B	5		0.757783
40	6	CA1 B	all	0.623963							42	12	CA1 B	all	0.762472							44	2	CA1 B	all	0.686627
46	6	CA1 B	1	0.629399	0.849924	0.624955	0.52781				48	15	CA1 B	1	0.589664	0.610952	0.614413	0.64095	0.64095			50	4	CA1 B	1	0.794199	0.675794	0.807291	0.730341	0.730341
46	6	CA1 B	2		0.783219						48	15	CA1 B	2		0.432338						50	4	CA1 B	2		0.772083
46	6	CA1 B	3		0.481473						48	15	CA1 B	3		0.250187						50	4	CA1 B	3		1.01205
46	6	CA1 B	4		0.664354						48	15	CA1 B	4		0.866913						50	4	CA1 B	4		0.868513
46	6	CA1 B	5		0.345805						48	15	CA1 B	5		0.911673						50	4	CA1 B	5		0.708016
46	6	CA1 B	all	0.52781							48	15	CA1 B	all	0.64095							50	4	CA1 B	all	0.730341
Slide #	Animal #	Region	ROI #	Mean MF/Mean Soma	MF/Soma	Mean (MF/Soma)					Slide #	Animal #	Region	ROI #	Mean MF/Mean Soma	MF/Soma	Mean (MF/Soma)					Slide #	Animal #	Region	ROI #	Mean MF/Mean Soma	MF/Soma	Mean (MF/Soma)
16	5	CA3 A	1	0.185048	0.379337	0.144622	0.433307	0.480096	0.508936		18	16	CA3 A	1	0.871815	0.484411	0.864469	0.877987	0.68256	0.572568		20	1	CA3 A	1	0.376386	0.389014	0.389007	0.285138	0.489988	0.512313
16	5	CA3 A	2		0.110285						18	16	CA3 A	2		0.919726						20	1	CA3 A	2		0.412512
16	5	CA3 A	3		0.0213893						18	16	CA3 A	3		1.14865						20	1	CA3 A	3		0.530226
16	5	CA3 A	4		0.0642467						18	16	CA3 A	4		0.738984						20	1	CA3 A	4		0.0895915
16	5	CA3 A	5		0.147854						18	16	CA3 A	5		1.03058						20	1	CA3 A	5		0.523694
16	5	CA3 A	all	0.433307							18	16	CA3 A	all	0.877987							20	1	CA3 A	all	0.285138
24	5	CA3 A	1	0.400064	0.230859	0.402601	0.526885				25	16	CA3 A	1	0.4927	0.487204	0.501143	0.603579				28	1	CA3 A	1	0.469151	0.42569	0.484841	0.558269
24	5	CA3 A	2		0.409019						25	16	CA3 A	2		0.594678						28	1	CA3 A	2		0.570566
24	5	CA3 A	3		0.504667						25	16	CA3 A	3		0.455032						28	1	CA3 A	3		0.513178
24	5	CA3 A	4		0.439923						25	16	CA3 A	4		0.553272						28	1	CA3 A	4		0.365541
24	5	CA3 A	5		0.428539						25	16	CA3 A	5		0.415529						28	1	CA3 A	5		0.549228
24	5	CA3 A	all	0.526885							25	16	CA3 A	all	0.603579							28	1	CA3 A	all	0.558269
32	13	CA3 A	1	0.384569	0.313597	0.384541	0.53323	0.53323			34	16	CA3 A	1	0.464557	0.486401	0.465424	0.566113				36	1	CA3 A	1	0.556701	0.52085	0.557565	0.626557
32	13	CA3 A	2		0.432621						34	16	CA3 A	2		0.443926						36	1	CA3 A	2		0.49134
32	13	CA3 A	3		0.385111						34	16	CA3 A	3		0.440822						36	1	CA3 A	3		0.465153
32	13	CA3 A	4		0.378784						34	16	CA3 A	4		0.438108						36	1	CA3 A	4		0.609533
32	13	CA3 A	5		0.412592						34	16	CA3 A	5		0.517862						36	1	CA3 A	5		0.700951
32	13	CA3 A	all	0.53323							34	16	CA3 A	all	0.566113							36	1	CA3 A	all	0.626557
40	6	CA3 A	1	0.423621	0.320504	0.530343	0.574054	0.513481			42	12	CA3 A	1	0.469943	0.528624	0.474644	0.561917	0.561917			44	2	CA3 A	1	0.490046	0.4988	0.495483	0.583829	0.583829
40	6	CA3 A	2		1.27815						42	12	CA3 A	2		0.570409						44	2	CA3 A	2		0.613783
40	6	CA3 A	3		0.38632						42	12	CA3 A	3		0.413451						44	2	CA3 A	3		0.410739
40	6	CA3 A	4		0.408045						42	12	CA3 A	4		0.436602						44	2	CA3 A	4		0.455729
40	6	CA3 A	5		0.258699						42	12	CA3 A	5		0.424134						44	2	CA3 A	5		0.498363
40	6	CA3 A	all	0.574054							42	12	CA3 A	all	0.561917							44	2	CA3 A	all	0.583829
46	6	CA3 A	1	0.325425	0.324615	0.330664	0.452908				48	15	CA3 A	1	0.393141	0.342644	0.400096	0.473229	0.473229			50	4	CA3 A	1	0.354053	0.322622	0.357569	0.463122	0.463122
46	6	CA3 A	2		0.284131						48	15	CA3 A	2		0.366717						50	4	CA3 A	2		0.390786
46	6	CA3 A	3		0.424369						48	15	CA3 A	3		0.376207						50	4	CA3 A	3		0.299141
46	6	CA3 A	4		0.300162						48	15	CA3 A	4		0.498696						50	4	CA3 A	4		0.447589
46	6	CA3 A	5		0.320045						48	15	CA3 A	5		0.416217						50	4	CA3 A	5		0.327707
46		CA3 A	all	0.452908							48	15	CA3 A	all	0.473229							50	4	CA3 A	all	0.463122
Slide #	Animal #	Region	ROI #	Mean AIS/Mean Soma	AIS/Soma	Mean (AIS/Soma)					Slide #	Animal #	Region	ROI #	Mean AIS/Mean Soma	AIS/Soma	Mean (AIS/Soma)					Slide #	Animal #	Region	ROI #	Mean AIS/Mean Soma	AIS/Soma	Mean (AIS/Soma)
24	5	CA3 A	1	0.606199	0.477334	0.60805	0.66604	0.66604	0.759512		25	16	CA3 A	1	0.750563	0.802616	0.774039	0.732231	0.779055	0.758711		28	1	CA3 A	1	0.878874	0.753144	0.913568	0.854892	0.848892	0.776636
24	5	CA3 A	2		0.674818						25	16	CA3 A	2		1.03073						28	1	CA3 A	2		1.33103
24	5	CA3 A	3		0.666056						25	16	CA3 A	3		0.711757						28	1	CA3 A	3		0.82073
24	5	CA3 A	4		0.727873						25	16	CA3 A	4		0.889046						28	1	CA3 A	4		0.759072
24	5	CA3 A	5		0.494167						25	16	CA3 A	5		0.436053						28	1	CA3 A	5		0.903863
24	5	CA3 A	all	0.66604							25	16	CA3 A	all	0.732231							28	1	CA3 A	all	0.854892
32	13	CA3 A	1	0.838562	0.643628	0.825185	0.919342	0.919342			34	16	CA3 A	1	0.941426	0.949712	0.937696	0.825878				36	1	CA3 A	1	0.787178	0.773612	0.791238	0.842893
32	13	CA3 A	2		0.760454						34	16	CA3 A	2		0.765508						36	1	CA3 A	2		0.762609
32	13	CA3 A	3		0.835392						34	16	CA3 A	3		1.20072						36	1	CA3 A	3		0.968736
32	13	CA3 A	4		0.770547						34	16	CA3 A	4		1.09518						36	1	CA3 A	4		0.546933
32	13	CA3 A	5		1.1159						34	16	CA3 A	5		0.677357						36	1	CA3 A	5		0.904301
32	13	CA3 A	all	0.919342							34	16	CA3 A	all	0.825878							36	1	CA3 A	all	0.842893
40	6	CA3 A	1	0.74516	0.639287	0.91783	0.711362	0.693155			42	12	CA3 A	1	0.646515	0.614406	0.65898	0.811328	0.811328			44	2	CA3 A	1	0.842029	0.904219	0.833147	0.78386	0.78386
40	6	CA3 A	2		2.12624						42	12	CA3 A	2		0.660946						44	2	CA3 A	2		0.654581
40	6	CA3 A	3		0.875135						42	12	CA3 A	3		0.656042						44	2	CA3 A	3		0.939803
40	6	CA3 A	4		0.552955						42	12	CA3 A	4		0.455328						44	2	CA3 A	4		0.922323
40	6	CA3 A	5		0.395536						42	12	CA3 A	5		0.908179						44	2	CA3 A	5		0.744808
40	6	CA3 A	all	0.711362							42	12	CA3 A	all	0.811328							44	2	CA3 A	all	0.78386
46	6	CA3 A	1	0.597623	0.411013	0.602967	0.674948				48	15	CA3 A	1	0.816728	0.905439	0.818628	0.685751	0.685751			50	4	CA3 A	1	0.646629	0.520687	0.644544	0.697158	0.697158
46	6	CA3 A	2		0.559805						48	15	CA3 A	2		0.728731						50	4	CA3 A	2		0.844064
46	6	CA3 A	3		0.759167						48	15	CA3 A	3		0.915351						50	4	CA3 A	3		0.77989
46	6	CA3 A	4		0.708121						48	15	CA3 A	4		0.911667						50	4	CA3 A	4		0.704171
46	6	CA3 A	5		0.576727						48	15	CA3 A	5		0.631951						50	4	CA3 A	5		0.373905
46	6	CA3 A	all	0.674948							48	15	CA3 A	all	0.685751							50	4	CA3 A	all	0.697158
Slide #	Animal #	Region	ROI #	Mean Hilus/Mean Dentate	Hilus/Dentate	Mean (Hilus/Dentate)					Slide #	Animal #	Region	ROI #	Mean Hilus/Mean Dentate	Hilus/Dentate	Mean (Hilus/Dentate)					Slide #	Animal #	Region	ROI #	Mean Hilus/Mean Dentate	Hilus/Dentate	Mean (Hilus/Dentate)
16	5	DG	1	0.189632	0.184629	0.190987	0.357044	0.362343	0.339837		18	16	DG	1	0.278091	0.414037	0.277411	0.400211	0.383243	0.334144		20	1	DG	1	0.300032	0.386242	0.306833	0.386736	0.504075	0.360941
16	5	DG	2		0.171618						18	16	DG	2		0.302032						20	1	DG	2		0.404909
16	5	DG	3		0.23456						18	16	DG	3		0.181196						20	1	DG	3		0.240186
16	5	DG	4		0.164199						18	16	DG	4		0.26204						20	1	DG	4		0.307676
16	5	DG	5		0.19993						18	16	DG	5		0.227747						20	1	DG	5		0.195153
16	5	DG	all	0.357044							18	16	DG	all	0.400211							20	1	DG	all	0.386736
24	5	DG	1	0.249742	0.289797	0.270498	0.367641				25	16	DG	1	0.20788	0.216064	0.208106	0.338271				28	1	DG	1	0.512982	0.752946	0.507393	0.538019
24	5	DG	2		0.263266						25	16	DG	2		0.212358						28	1	DG	2		0.631683
24	5	DG	3		0.145243						25	16	DG	3		0.179192						28	1	DG	3		0.334498
24	5	DG	4		0.474404						25	16	DG	4		0.235591						28	1	DG	4		0.344893
24	5	DG	5		0.179779						25	16	DG	5		0.197323						28	1	DG	5		0.472946
24	5	DG	all	0.367641							25	16	DG	all	0.338271							28	1	DG	all	0.538019
32	13	DG	1	0.240077	0.301588	0.243479	0.361596	0.361596			34	16	DG	1	0.336473	0.390089	0.337764	0.411248				36	1	DG	1	0.463195	0.633262	0.497893	0.587468
32	13	DG	2		0.233308						34	16	DG	2		0.394403						36	1	DG	2		0.416497
32	13	DG	3		0.192469						34	16	DG	3		0.231921						36	1	DG	3		0.750699
32	13	DG	4		0.232346						34	16	DG	4		0.383954						36	1	DG	4		0.397958
32	13	DG	5		0.257685						34	16	DG	5		0.288452						36	1	DG	5		0.291046
32	13	DG	all	0.361596							34	16	DG	all	0.411248							36	1	DG	all	0.587468
40	6	DG	1	0.251897	0.3067	0.253794	0.359701	0.295573			42	12	DG	1	0.216893	0.337019	0.222543	0.358371	0.358371			44	2	DG	1	0.178549	0.158066	0.178622	0.290239	0.290239
40	6	DG	2		0.247006						42	12	DG	2		0.204173						44	2	DG	2		0.291333
40	6	DG	3		0.252831						42	12	DG	3		0.210945						44	2	DG	3		0.147347
40	6	DG	4		0.216473						42	12	DG	4		0.214558						44	2	DG	4		0.150519
40	6	DG	5		0.245962						42	12	DG	5		0.146021						44	2	DG	5		0.145843
40	6	DG	all	0.359701							42	12	DG	all	0.358371							44	2	DG	all	0.290239
46	6	DG	1	0.161574	0.202228	0.162404	0.231444				48	15	DG	1	0.194499	0.15048	0.200422	0.260818	0.260818			50	4	DG	1	0.196791	0.177513	0.197422	0.288509	0.288509
46	6	DG	2		0.158988						48	15	DG	2		0.214308						50	4	DG	2		0.216538
46	6	DG	3		0.139781						48	15	DG	3		0.167455						50	4	DG	3		0.177797
46	6	DG	4		0.170011						48	15	DG	4		0.167853						50	4	DG	4		0.187572
46	6	DG	5		0.141014						48	15	DG	5		0.302015						50	4	DG	5		0.227689
46	6	DG	all	0.231444							48	15	DG	all	0.260818							50	4	DG	all	0.288509

## Sheet: Q2 Raw Data 1
Image Details				Raw Data				Adjusted Ratio Method
Slide #	Genotype	Region	ROI #	Mean MF	SD MF	Mean Soma	SD Soma	Mean MF	Mean Soma	Mean MF/Mean Soma	MF/Soma	Mean (MF/Soma)		Slide #	Background
16	WT	CA3 A	1	650.895	99.6646	625.048	113.077	350.895	325.048	1.04686	1.07952	1.05102		16	300
16	WT	CA3 A	2	598.007	87.6899	597.932	85.2964	298.007	297.932		1.00025			18	394
16	WT	CA3 A	3	596.228	85.7938	548.295	75.3618	296.228	248.295		1.19305			20	296
16	WT	CA3 A	4	598.621	90.8343	584.959	86.2126	298.621	284.959		1.04794
16	WT	CA3 A	5	576.805	80.4853	596.259	86.3866	276.805	296.259		0.934334
18	254	CA3 A	1	874.62	139.956	900.777	141.248	480.62	506.777	1.06726	0.948385	1.07101
18	254	CA3 A	2	873.181	133.866	876.21	136.332	479.181	482.21		0.993718
18	254	CA3 A	3	905.316	138.266	871.678	126.631	511.316	477.678		1.07042
18	254	CA3 A	4	935.616	150.003	860.403	132.013	541.616	466.403		1.16126
18	254	CA3 A	5	915.766	163.029	835.696	144.32	521.766	441.696		1.18128
20	256	CA3 A	1	591.55	81.1308	684.732	99.2933	295.55	388.732	0.717512	0.760291	0.729346
20	256	CA3 A	2	597.104	88.6142	702.221	114.011	301.104	406.221		0.741231
20	256	CA3 A	3	627.806	94.8459	708.472	125.422	331.806	412.472		0.804433
20	256	CA3 A	4	677.824	109.766	928.724	139.712	381.824	632.724		0.603461
20	256	CA3 A	5	670.012	104.88	803.263	123.547	374.012	507.263		0.737314
Slide #	Genotype	Region	ROI #	Mean AIS	SD AIS	Mean Soma	SD Soma	Mean AIS	Mean Soma	Mean AIS/Mean Soma	AIS/Soma	Mean (AIS/Soma)		Slide #	Background
16	WT	CA1 B	1	738.682	223.236	644.822	97.2449	336.682	242.822	1.6443	1.38653	1.66388		16	402
16	WT	CA1 B	2	936.669	406.28	626.528	93.567	534.669	224.528		2.3813			18	450
16	WT	CA1 B	3	842.961	273.608	657.209	98.8391	440.961	255.209		1.72784			20	364
16	WT	CA1 B	4	793.471	252.601	648.922	100.986	391.471	246.922		1.58541
16	WT	CA1 B	5	736.504	230.999	672.128	187.315	334.504	270.128		1.23831
18	254	CA1 B	1	835.099	166.983	775.507	111.637	385.099	325.507	1.29496	1.18308	1.2977
18	254	CA1 B	2	839.493	193.926	763.799	116.554	389.493	313.799		1.24122
18	254	CA1 B	3	935.022	209.14	753.898	114.624	485.022	303.898		1.596
18	254	CA1 B	4	811.735	138.92	761.405	144.529	361.735	311.405		1.16162
18	254	CA1 B	5	822.7	185.771	735.248	118.64	372.7	285.248		1.30658
20	256	CA1 B	1	704.132	141.777	656.224	95.2818	340.132	292.224	1.05891	1.16394	1.0599
20	256	CA1 B	2	688.761	142.739	667.424	95.4983	324.761	303.424		1.07032
20	256	CA1 B	3	713.448	171.331	693.955	94.7363	349.448	329.955		1.05908
20	256	CA1 B	4	686.103	133.794	678.094	97.9445	322.103	314.094		1.0255
20	256	CA1 B	5	661.236	124.259	667.103	99.6866	297.236	303.103		0.980643
Slide #	Genotype	Region	ROI #	Mean AIS&MF	SD AIS&MF	Mean Soma	SD Soma	Mean AIS&MF	Mean Mg	Mean AIS&MF/Mean Soma	AIS&MF/Soma	Mean (AIS&MF/Soma)		Slide #	Background
16	WT	DG	1	736.346	95.1873	475.141	59.7194	412.346	151.141	2.14024	2.72823	2.15818		24	324
16	WT	DG	2	626.856	80.8252	471.973	67.4542	302.856	147.973		2.04671			25	296
16	WT	DG	3	715.429	103.73	507.345	79.7399	391.429	183.345		2.13493			28	311
16	WT	DG	4	651.096	89.5715	509.969	76.3119	327.096	185.969		1.75887
16	WT	DG	5	691.521	96.9165	497.184	69.3588	367.521	173.184		2.12215
18	254	DG	1	818.521	116.824	554.118	73.6188	522.521	258.118	1.80945	2.02435	1.81323
18	254	DG	2	733.438	111.68	536.681	69.5795	437.438	240.681		1.8175
18	254	DG	3	749.977	113.175	544.157	71.2987	453.977	248.157		1.82939
18	254	DG	4	735.799	111.531	536.46	70.4192	439.799	240.46		1.82899
18	254	DG	5	727.158	125.963	571.34	83.7945	431.158	275.34		1.56591
20	256	DG	1	573.351	72.7059	520.898	65.8812	262.351	209.898	1.23848	1.24989	1.23875
20	256	DG	2	578.479	74.7579	539.351	64.4169	267.479	228.351		1.17135
20	256	DG	3	599.879	79.4153	538.348	70.9471	288.879	227.348		1.27065
20	256	DG	4	607.173	83.1657	541.517	66.4313	296.173	230.517		1.28482
20	256	DG	5	598.123	75.5195	546.922	69.5013	287.123	235.922		1.21703

## Sheet: Q2 Raw Data 2
Image Details				Raw Data				Adjusted Ratio Method
Slide #	Genotype	Region	ROI #	Mean MF	SD MF	Mean Soma	SD Soma	Mean MF	Mean Soma	Mean MF/Mean Soma	MF/Soma	Mean (MF/Soma)		Slide #	Background
24	WT	CA3 A	1	963.939	163.304	669.713	96.658	646.939	352.713	1.79677	1.83418	1.80706		24	317
24	WT	CA3 A	2	947.257	162.765	712.56	103.037	630.257	395.56		1.59333			25	291
24	WT	CA3 A	3	972.729	165.066	708.988	127.58	655.729	391.988		1.67283			28	297
24	WT	CA3 A	4	1026.43	174.285	653.487	85.2033	709.431	336.487		2.10834
24	WT	CA3 A	5	991.555	182.821	686.291	100.466	674.555	369.291		1.82662
25	254	CA3 A	1	764.592	138.884	737.141	119.449	473.592	446.141	1.26922	1.06153	1.28084
25	254	CA3 A	2	801.229	148.679	721.422	116.584	510.229	430.422		1.18541
25	254	CA3 A	3	796.779	145.296	671.083	103.706	505.779	380.083		1.33071
25	254	CA3 A	4	814.653	150.231	693.133	147.653	523.653	402.133		1.30219
25	254	CA3 A	5	841.346	158.692	652.039	99.8289	550.346	361.039		1.52434
28	256	CA3 A	1	563.353	80.9131	564.198	81.7136	266.353	267.198	0.873981	0.996835	0.880594
28	256	CA3 A	2	557.519	81.8277	588.593	93.7697	260.519	291.593		0.893433
28	256	CA3 A	3	575.22	79.6893	618.224	94.7488	278.22	321.224		0.866125
28	256	CA3 A	4	575.741	86.4529	653.757	99.4213	278.741	356.757		0.78132
28	256	CA3 A	5	586.37	86.7395	631.433	106.45	289.37	334.433		0.865257
Slide #	Genotype	Region	ROI #	Mean AIS	SD AIS	Mean Soma	SD Soma	Mean AIS	Mean Mg	Mean AIS/Mean Soma	AIS/Soma	Mean (AIS/Soma)		Slide #	Background
24	WT	CA3 A	1	759.335	150.538	669.713	96.658	442.335	352.713	1.20294	1.25409	1.2001		24	317
24	WT	CA3 A	2	827.919	176.683	712.56	103.037	510.919	395.56		1.29164			25	291
24	WT	CA3 A	3	798.29	180.324	708.988	127.58	481.29	391.988		1.22782			28	297
24	WT	CA3 A	4	688.967	159.624	653.487	85.2033	371.967	336.487		1.10544
24	WT	CA3 A	5	731.165	151.711	686.291	100.466	414.165	369.291		1.12151
25	254	CA3 A	1	747.786	175.433	737.141	119.449	456.786	446.141	1.25205	1.02386	1.2623
25	254	CA3 A	2	775.466	202.65	721.422	116.584	484.466	430.422		1.12556
25	254	CA3 A	3	868.02	324.604	671.083	103.706	577.02	380.083		1.51814
25	254	CA3 A	4	839.843	250.79	693.133	147.653	548.843	402.133		1.36483
25	254	CA3 A	5	752.807	181.745	652.039	99.8289	461.807	361.039		1.2791
28	256	CA3 A	1	548.865	71.6635	564.198	81.7136	251.865	267.198	0.956673	0.942616	0.955971
28	256	CA3 A	2	574.134	92.5212	588.593	93.7697	277.134	291.593		0.950414
28	256	CA3 A	3	594.234	106.649	618.224	94.7488	297.234	321.224		0.925319
28	256	CA3 A	4	631.051	104.576	653.757	99.4213	334.051	356.757		0.936354
28	256	CA3 A	5	639.845	104.843	631.433	106.45	342.845	334.433		1.02515
Slide #	Genotype	Region	ROI #	Mean AIS	SD AIS	Mean Soma	SD Soma	Mean AIS	Mean Mg	Mean AIS/Mean Soma	AIS/Soma	Mean (AIS/Soma)		Slide #	Background
24	WT	CA1 B	1	756.985	146.662	668.218	105.876	382.985	294.218	1.1645	1.30171	1.17158		24	374
24	WT	CA1 B	2	737.909	207.424	636.607	80.5444	363.909	262.607		1.38575			25	357
24	WT	CA1 B	3	664.592	110.737	614.69	79.4304	290.592	240.69		1.20733			28	296
24	WT	CA1 B	4	647.016	104.249	653.149	90.2061	273.016	279.149		0.978027
24	WT	CA1 B	5	685.461	152.276	690.174	90.3877	311.461	316.174		0.985094
25	254	CA1 B	1	778.471	194.974	590.745	83.0699	421.471	233.745	1.51856	1.80312	1.52208
25	254	CA1 B	2	687.041	169.195	591.22	87.8943	330.041	234.22		1.40911
25	254	CA1 B	3	700.921	203.894	609.24	80.7435	343.921	252.24		1.36347
25	254	CA1 B	4	697.078	180.275	593.145	83.5693	340.078	236.145		1.44013
25	254	CA1 B	5	708.7	240.195	577.559	75.346	351.7	220.559		1.59459
28	256	CA1 B	1	536.103	104.924	496.103	76.2583	240.103	200.103	1.10588	1.1999	1.11246
28	256	CA1 B	2	553.097	109.482	536.478	76.4913	257.097	240.478		1.06911
28	256	CA1 B	3	540.019	92.1968	529.492	76.3673	244.019	233.492		1.04508
28	256	CA1 B	4	559.038	111.403	562.215	82.5808	263.038	266.215		0.988067
28	256	CA1 B	5	586.696	117.306	526.687	72.24	290.696	230.687		1.26014
Slide #	Genotype	Region	ROI #	Mean AIS&MF	SD AIS&MF	Mean Soma	SD Soma	Mean AIS&MF	Mean Mg	Mean AIS&MF/Mean Soma	AIS&MF/Soma	Mean (AIS&MF/Soma)		Slide #	Background
24	WT	DG	1	1183.17	209.179	634.438	115.055	832.175	283.438	2.31103	2.936	2.46226		24	351
24	WT	DG	2	1211.06	180.309	822.536	152.203	860.058	471.536		1.82395			25	334
24	WT	DG	3	1283.33	198.8	639.624	149.7	932.331	288.624		3.23026			28	382
24	WT	DG	4	1189.91	272.253	846.588	130.723	838.909	495.588		1.69276
24	WT	DG	5	1126.66	201.216	646.113	138.874	775.655	295.113		2.62833
25	254	DG	1	1235.15	195.135	685.255	166.29	901.152	351.255	2.33708	2.56552	2.34799
25	254	DG	2	1216.36	217.401	703.069	172.77	882.363	369.069		2.39078
25	254	DG	3	1268.08	214.769	726.417	165.86	934.076	392.417		2.38032
25	254	DG	4	1224.87	216.016	725.512	173.398	890.865	391.512		2.27545
25	254	DG	5	1278.95	198.731	778.074	184.766	944.947	444.074		2.1279
28	256	DG	1	1031.33	173.648	767.75	130.003	649.327	385.75	1.85434	1.68328	1.86254
28	256	DG	2	1055.55	162.526	711.375	121.646	673.548	329.375		2.04493
28	256	DG	3	1116.45	171.921	774.986	145.284	734.45	392.986		1.8689
28	256	DG	4	1024.34	154.752	704.379	142.968	642.34	322.379		1.9925
28	256	DG	5	999.855	155.371	740.571	139.206	617.855	358.571		1.7231

## Sheet: Q2 Raw Data 3
Image Details				Raw Data				Adjusted Ratio Method
Slide #	Genotype	Region	ROI #	Mean AIS	SD AIS	Mean Soma	SD Soma	Mean AIS	Mean Soma	Mean AIS/Mean Soma	AIS/Soma	Mean (AIS/Soma)		Slide #	Background
32	WT	CA1 B	1	827.933	237.688	737.919	106.025	449.933	359.919	1.76118	1.25009	1.76457		32	378
32	WT	CA1 B	2	980.161	364.876	750.149	120.37	602.161	372.149		1.61806			34	431
32	WT	CA1 B	3	1233.75	406.907	728.733	101.376	855.752	350.733		2.43989			36	311
32	WT	CA1 B	4	1091.98	328.533	748.924	108.815	713.982	370.924		1.92488
32	WT	CA1 B	5	949.443	309.894	737.416	107.825	571.443	359.416		1.58992
34	254	CA1 B	1	1077.15	336.483	774.061	119.907	646.153	343.061	1.98453	1.8835	1.99131
34	254	CA1 B	2	1190.92	443.238	777.783	124.37	759.923	346.783		2.19135
34	254	CA1 B	3	1177.28	463.008	772.759	115.547	746.282	341.759		2.18365
34	254	CA1 B	4	1049.01	405.398	808.903	160.912	618.014	377.903		1.63538
34	254	CA1 B	5	1139.17	410.017	774.326	123.604	708.172	343.326		2.06268
36	256	CA1 B	1	723.973	154.31	709.349	96.729	412.973	398.349	1.30188	1.03671	1.30459
36	256	CA1 B	2	865.446	277.718	696.879	108.259	554.446	385.879		1.43684
36	256	CA1 B	3	822.436	238.573	741.782	114.609	511.436	430.782		1.18723
36	256	CA1 B	4	852.784	250.395	717.686	97.3242	541.784	406.686		1.33219
36	256	CA1 B	5	918.86	290.448	708.305	100.003	607.86	397.305		1.52996
Slide #	Genotype	Region	ROI #	Mean MF	SD MF	Mean Soma	SD Soma	Mean MF	Mean Soma	Mean MF/Mean Soma	MF/Soma	Mean (MF/Soma)		Slide #	Background
32	WT	CA3 A	1	1316.73	269.238	860.572	170.789	978.729	522.572	1.82753	1.87291	1.83679		32	338
32	WT	CA3 A	2	1396.16	287.232	962.721	227.692	1058.16	624.721		1.69382			34	359
32	WT	CA3 A	3	1463.61	261.201	887.378	204.49	1125.61	549.378		2.04887			36	289
32	WT	CA3 A	4	1504.15	290.112	935.101	162.652	1166.15	597.101		1.95302
32	WT	CA3 A	5	1378.51	302.19	982.155	187.526	1040.51	644.155		1.61531
34	254	CA3 A	1	1462.6	266.336	916.583	150.993	1103.6	557.583	1.70059	1.97925	1.70556
34	254	CA3 A	2	1530.93	276.618	950.968	146.769	1171.93	591.968		1.97973
34	254	CA3 A	3	1374.19	273.521	984.452	166.912	1015.19	625.452		1.62313
34	254	CA3 A	4	1267.22	254.708	960.043	168.262	908.217	601.043		1.51107
34	254	CA3 A	5	1212.69	208.84	954.065	156.166	853.693	595.065		1.43462
36	256	CA3 A	1	684.886	89.6232	799.329	119.452	395.886	510.329	0.727298	0.775746	0.729924
36	256	CA3 A	2	694.198	91.3739	844.553	133.871	405.198	555.553		0.729361
36	256	CA3 A	3	728.267	99.6856	919.191	177.42	439.267	630.191		0.697037
36	256	CA3 A	4	828.769	111.754	1010.45	168.153	539.769	721.448		0.748174
36	256	CA3 A	5	835.029	117.038	1069.82	179.663	546.029	780.821		0.699301
Slide #	Genotype	Region	ROI #	Mean AIS	SD AIS	Mean Soma	SD Soma	Mean AIS	Mean Soma	Mean AIS/Mean Soma	AIS/Soma	Mean (AIS/Soma)		Slide #	Background
32	WT	CA3 A	1	1078	284.602	860.572	170.789	740.002	522.572	1.2686	1.41608	1.27065		32	338
32	WT	CA3 A	2	989.165	258.901	962.721	227.692	651.165	624.721		1.04233			34	359
32	WT	CA3 A	3	1016.87	318.875	887.378	204.49	678.872	549.378		1.23571			36	289
32	WT	CA3 A	4	1047.14	381.991	935.101	162.652	709.139	597.101		1.18764
32	WT	CA3 A	5	1285.87	331.332	982.155	187.526	947.874	644.155		1.4715
34	254	CA3 A	1	992.933	300.404	916.583	150.993	633.933	557.583	1.40325	1.13693	1.40007
34	254	CA3 A	2	1199.43	399.148	950.968	146.769	840.433	591.968		1.41973
34	254	CA3 A	3	1185.35	525.986	984.452	166.912	826.354	625.452		1.32121
34	254	CA3 A	4	1406.2	531.793	960.043	168.262	1047.2	601.043		1.74231
34	254	CA3 A	5	1180.29	428.868	954.065	156.166	821.295	595.065		1.38018
36	256	CA3 A	1	716.95	111.353	799.329	119.452	427.95	510.329	0.846533	0.838577	0.848641
36	256	CA3 A	2	755.188	162.571	844.553	133.871	466.188	555.553		0.839142
36	256	CA3 A	3	882.001	163.965	919.191	177.42	593.001	630.191		0.940986
36	256	CA3 A	4	873.214	189.105	1010.45	168.153	584.214	721.448		0.809779
36	256	CA3 A	5	925.151	196.181	1069.82	179.663	636.151	780.821		0.814721
Slide #	Genotype	Region	ROI #	Mean MF	SD MF	Mean Soma	SD Soma	Mean MF	Mean Soma	Mean MF/Mean Soma	MF/Soma	Mean (MF/Soma)		Slide #	Background
32	WT	DG	1	1277.25	176.978	602.681	108.2	979.249	304.681	2.9678	3.21402	2.99509		32	298
32	WT	DG	2	1398.9	214.39	654.741	119.259	1100.9	356.741		3.08598			34	325
32	WT	DG	3	1580.48	283.986	688.476	131.055	1282.48	390.476		3.2844			36	322
32	WT	DG	4	1479.94	229.793	760.213	156.199	1181.94	462.213		2.55714
32	WT	DG	5	1377.18	286.011	678.812	130.808	1079.18	380.812		2.8339
34	254	DG	1	1896.51	355.986	730.851	156.829	1571.51	405.851	3.71687	3.87214	3.72426
34	254	DG	2	1876.77	409.794	724.795	129.79	1551.77	399.795		3.88142
34	254	DG	3	1851.22	341.09	729.387	141.832	1526.22	404.387		3.77417
34	254	DG	4	1756.85	384.439	760.4	163.054	1431.85	435.4		3.28859
34	254	DG	5	1814.85	358.803	716.552	155.579	1489.85	391.552		3.80499
36	256	DG	1	801.523	136.076	674.491	95.2113	479.523	352.491	1.77237	1.36038	1.78451
36	256	DG	2	953.577	138.507	661.522	102.697	631.577	339.522		1.86019
36	256	DG	3	898.774	146.613	602.881	90.0978	576.774	280.881		2.05345
36	256	DG	4	982.048	149.364	681.45	97.1417	660.048	359.45		1.83627
36	256	DG	5	934.613	142.173	660.039	98.6859	612.613	338.039		1.81226

[truncated: 7 more sheets: Q2 Raw Data 4, Q2 Raw Data 5, Q3 Raw Data 1, Q3 Raw Data 2, Q3 Raw Data 3, Q3 Raw Data 4, Q3 Raw Data 5]
