# Supplementary material for: Plural molecular and cellular mechanisms of pore domain KCNQ2 encephalopathy
Source: eLife. 2025 Jan 6;13:RP91204. doi: 10.7554/eLife.91204 (PMC11703504; doi:10.7554/eLife.91204)
Supplement: Figure 9—source data 1. [file elife-91204-fig9-data1.xlsx]

## Sheet: KCNQ2 Monomer Quantification
Mouse	Tissue weight (mg)	Genotype	Q2 Signal	Normalized Q2 Signal only	Tubulin Signal	Q2/Tubulin signal	Normalized Q2/Tubulin Signal
G5	40	WT	1.37	1.18444	3.32	0.412651	1.42649
D1	62.1	E254fs/+	0.31	0.268012	3.21	0.0965732	0.333843
G4	38.4	G256W/+	0.568	0.491066	5.77	0.0984402	0.340297
W2	36	WT	1.21	1.04611	5.98	0.202341	0.699471
D2	36.5	E254fs/+	0.511	0.441787	4.07	0.125553	0.434022
G2	30.2	G256W/+	0.492	0.42536	3.96	0.124242	0.429492
W3	24.6	WT	0.89	0.769452	3.52	0.252841	0.874043
D3	38	E254fs/+	0.506	0.437464	3.88	0.130412	0.450821
G3	29.7	G256W/+	0.426	0.3683	2.95	0.144407	0.499198

## Sheet: KCNQ2 tetramer quantification
Mouse	Tissue weight (mg)	Genotype	Tetramer Signal	Normalized Tetramer Signal only	Tubulin Signal	Tetramer/Tubulin signal	Normalized Tetramer/Tubulin Signal
G5	40	WT	0.507	0.405925	3.32	0.152711	0.487408
D1	62.1	E254fs/+	0.477	0.381906	3.21	0.148598	0.474281
G4	38.4	G256W/+	0.325	0.260208	5.77	0.0563258	0.179775
W2	36	WT	1.14	0.91273	5.98	0.190635	0.608452
D2	36.5	E254fs/+	0.653	0.522818	4.07	0.160442	0.512084
G2	30.2	G256W/+	1.35	1.08086	3.96	0.340909	1.08808
W3	24.6	WT	2.1	1.68135	3.52	0.596591	1.90414
D3	38	E254fs/+	0.62	0.496397	3.88	0.159794	0.510014
G3	29.7	G256W/+	0.64	0.51241	2.95	0.216949	0.692437

## Sheet: KCNQ2 dimer quantification
Mouse	Tissue weight (mg)	Genotype	Dimer Signal	Normalized Dimer Signal only	Tubulin Signal	Dimer/Tubulin signal	Normalized Dimer/Tubulin Signal
G5	40	WT	1.17	0.676301	3.32	0.35241	0.845646
D1	62.1	E254fs/+	1.11	0.641618	3.21	0.345794	0.829772
G4	38.4	G256W/+	0.914	0.528324	5.77	0.158406	0.380111
W2	36	WT	2.09	1.20809	5.98	0.349498	0.83866
D2	36.5	E254fs/+	1.15	0.66474	4.07	0.282555	0.678022
G2	30.2	G256W/+	1.12	0.647399	3.96	0.282828	0.678677
W3	24.6	WT	1.93	1.11561	3.52	0.548295	1.31569
D3	38	E254fs/+	1.05	0.606936	3.88	0.270619	0.649379
G3	29.7	G256W/+	1.22	0.705202	2.95	0.413559	0.992381

## Sheet: Total Q2 Signal Quantification
Mouse	Tissue weight (mg)	Genotype	Monomer Signal	Tetramer Signal	Dimer Signal	Total KCNQ2 Signal	Normalized Total KCNQ2 Signal only	Tubulin Signal	Total KCNQ2/Tubulin signal	Normalized Total KCNQ2/Tubulin Signal
G5	40	WT	1.37	0.507	1.17	3.047	0.736762	3.32	0.917771	0.900372
D1	62.1	E254fs/+	0.31	0.477	1.11	1.897	0.458693	3.21	0.590966	0.579762
G4	38.4	G256W/+	0.568	0.325	0.914	1.807	0.436931	5.77	0.313172	0.307234
W2	36	WT	1.21	1.14	2.09	4.44	1.07359	5.98	0.742475	0.728399
D2	36.5	E254fs/+	0.511	0.653	1.15	2.314	0.559523	4.07	0.56855	0.557772
G2	30.2	G256W/+	0.492	1.35	1.12	2.962	0.716209	3.96	0.74798	0.7338
W3	24.6	WT	0.89	2.1	1.93	4.92	1.18965	3.52	1.39773	1.37123
D3	38	E254fs/+	0.506	0.62	1.05	2.176	0.526155	3.88	0.560825	0.550193
G3	29.7	G256W/+	0.426	0.64	1.22	2.286	0.552752	2.95	0.774915	0.760224

## Sheet: 234 kD signal quantification
Mouse	Tissue weight (mg)	Genotype	234 kD Signal	Normalized 234 kD Signal only	Tubulin Signal	234 kD/Tubulin signal	Normalized 234 kD/Tubulin Signal
G5	40	WT	1.6	0.893855	3.32	0.481928	1.08251
D1	62.1	E254fs/+	1.27	0.709497	3.21	0.395639	0.888691
G4	38.4	G256W/+	1.14	0.636872	5.77	0.197574	0.443794
W2	36	WT	1.86	1.03911	5.98	0.311037	0.698657
D2	36.5	E254fs/+	1.19	0.664804	4.07	0.292383	0.656757
G2	30.2	G256W/+	1.17	0.653631	3.96	0.295455	0.663655
W3	24.6	WT	1.91	1.06704	3.52	0.542614	1.21883
D3	38	E254fs/+	1.25	0.698324	3.88	0.322165	0.723653
G3	29.7	G256W/+	1.47	0.821229	2.95	0.498305	1.1193

## Sheet: Total Q2 Signal +234 kD 
Mouse	Tissue weight (mg)	Genotype	Monomer Signal	Tetramer Signal	Dimer Signal	234 kD Signal	Total KCNQ2 Signal	Normalized Total KCNQ2 Signal only	Tubulin Signal	Total KCNQ2/Tubulin signal	Normalized Total KCNQ2/Tubulin Signal
G5	40	WT	1.37	0.507	1.17	1.6	4.647	0.784216	3.32	1.3997	0.955741
D1	62.1	E254fs/+	0.31	0.477	1.11	1.27	3.167	0.534455	3.21	0.986604	0.673672
G4	38.4	G256W/+	0.568	0.325	0.914	1.14	2.947	0.497328	5.77	0.510745	0.348747
W2	36	WT	1.21	1.14	2.09	1.86	6.3	1.06317	5.98	1.05351	0.719358
D2	36.5	E254fs/+	0.511	0.653	1.15	1.19	3.504	0.591326	4.07	0.860934	0.587862
G2	30.2	G256W/+	0.492	1.35	1.12	1.17	4.132	0.697306	3.96	1.04343	0.712477
W3	24.6	WT	0.89	2.1	1.93	1.91	6.83	1.15261	3.52	1.94034	1.3249
D3	38	E254fs/+	0.506	0.62	1.05	1.25	3.426	0.578163	3.88	0.88299	0.602922
G3	29.7	G256W/+	0.426	0.64	1.22	1.47	3.756	0.633853	2.95	1.27322	0.869379

## Sheet: KCNQ3 Monomer Quantification
Mouse	Tissue weight (mg)	Genotype	Q3 Signal	Normalized Q3 Signal only	Tubulin Signal	Q3/Tubulin signal	Normalized Q3/Tubulin Signal
G5	40	WT	11.4	1.20169	3.32	3.43373	1.50797
D1	62.1	E254fs/+	11.4	1.20169	3.21	3.5514	1.55964
G4	38.4	G256W/+	10.8	1.13844	5.77	1.87175	0.822003
W2	36	WT	12.4	1.3071	5.98	2.07358	0.910639
D2	36.5	E254fs/+	11.9	1.25439	4.07	2.92383	1.28404
G2	30.2	G256W/+	11.6	1.22277	3.96	2.92929	1.28644
W3	24.6	WT	4.66	0.491216	3.52	1.32386	0.581392
D3	38	E254fs/+	8.55	0.901265	3.88	2.20361	0.967743
G3	29.7	G256W/+	10	1.05411	2.95	3.38983	1.48869

## Sheet: BCA Results and Blot Loading
KCNQ2 Blot Loading (20 uL per lane)
Mouse	Genotype	Protein concentration ug/uL	Vol for 30 uG*2.2 Overhead	Sample buffer w/*2.2 Overhead	H2O
G5	WT	12.9864	5.08224	11	27.9178
W2	WT	8.30112	7.95073	11	25.0493
W3	WT	9.13704	7.22335	11	25.7767
D1	E254fs/+	9.66336	6.82992	11	26.1701
D2	E254fs/+	8.8584	7.45056	11	25.5494
D3	E254fs/+	9.02352	7.31422	11	25.6858
G2	G256W/+	9.3228	7.07942	11	25.9206
G3	G256W/+	9.10608	7.2479	11	25.7521
G4	G256W/+	10.3961	6.34855	11	26.6515
